# Supplementary material for: Fenton-like chemistry enables catalytic oxidative desulfurization of thioacetals and thioketals with hydrogen peroxide
Source: Royal Society of Chemistry journal article supplement (doi:10.1039/d2gc01050j), 2022-01-01

## Supplementary Information

### Fenton-like Chemistry Enables Catalytic Oxidative Desulfurization of Thioacetals and Thioketals with Hydrogen Peroxide

Guodong Zhao<sup>#\*a,b</sup>, Yaxin Wang<sup>#a</sup>, Cheng Wang<sup>#a</sup>, Haimin Lei<sup>a</sup>, Bingqing Yi<sup>a</sup> and Rongbiao Tong<sup>\*b,c</sup>

<sup>a</sup>School of Chinese Materia Medica, Beijing University of Chinese Medicine, Beijing 102488, China. E-mail: [202001036@bucm.edu.cn](mailto:202001036@bucm.edu.cn); Fax: +(86) 010-64213817; Tel: +(86) 010-64286426

<sup>b</sup>Department of Chemistry and <sup>c</sup>the Southern Marine Science and Engineering Guangdong Laboratory (Guangzhou), The Hong Kong University of Science and Technology, Clearwater Bay, Kowloon, Hong Kong, China. E-mail: [rtong@ust.hk](mailto:rtong@ust.hk); Fax: +(852) 23581594; Tel: +(852) 23587357

#### Table of Contents

|     |                                                                                                          |      |
|-----|----------------------------------------------------------------------------------------------------------|------|
| 1.  | General Information                                                                                      | S-2  |
| 2.  | [Br <sup>+</sup> ] from CeBr <sub>3</sub> -H <sub>2</sub> O <sub>2</sub> system was confirmed to be HOBr | S-3  |
| 3.  | Optimization of the 1,3-dithiane deprotection                                                            | S-4  |
| 4.  | Preparation of thioacetals, thioketals and methylthiomethyl ether                                        | S-4  |
| 5.  | Deprotections of thioacetals, thioketals and methylthiomethyl ether                                      | S-19 |
| 6.  | Gram-scale dethioacetalization of <b>3a</b> and <b>5j</b> under open-air condition                       | S-35 |
| 7.  | Controlled experiments of bromide and cerium catalysts for dethioacetalization                           | S-36 |
| 8.  | Radical trapping (ABTS) experiments                                                                      | S-37 |
| 9.  | Isotopic labeling experiment                                                                             | S-38 |
| 10. | The isolation and confirmation of related side products                                                  | S-38 |
| 11. | Green chemistry metrics analysis                                                                         | S-41 |
| 12. | References                                                                                               | S-43 |
| 13. | Copies of <sup>1</sup> H- and <sup>13</sup> C-NMR spectra                                                | S-46 |

## 1. General Information

Reactions were carried out in a round-bottom flask with vigorous stirring at room temperature with open-air condition, unless otherwise noted. Anhydrous ethanol (EtOH), acetonitrile (MeCN), tetrahydrofuran (THF), dichloromethane (DCM), dimethyl sulfoxide (DMSO), *N,N*-dimethylformamide (DMF), 1-butanol (*n*-BuOH) and pyridine were used as received without further purification unless otherwise noted. Anhydrous CeBr<sub>3</sub>, FeBr<sub>2</sub> and FeBr<sub>3</sub> were purchased from Sigma-Aldrich and dried under vacuum before use. Solvents were used as received from commercial suppliers without prior purification for workup, extraction and column chromatography. Reactions were monitored by thin-layer chromatography (TLC, 0.25 mm) on pre-coated silica gel plates. Flash chromatography was performed with silica gel 60 (particle size 0.040-0.062 mm). <sup>1</sup>H- and <sup>13</sup>C-NMR spectra were recorded on a 400 MHz spectrometer (400 MHz for <sup>1</sup>H, 100 MHz for <sup>13</sup>C). Chemical shifts are reported in parts per million (ppm) as values relative to the internal chloroform (7.26 ppm for <sup>1</sup>H and 77.16 ppm for <sup>13</sup>C) or DMSO (2.50 ppm for <sup>1</sup>H and 39.52 ppm for <sup>13</sup>C). Abbreviations for signal coupling are as follows: s, singlet; d, doublet; t, triplet; q, quartet; m, multiplet. Mass spectra were detected by ESI-TOF (Agilent 6520 or G6125B) or GC-MS (Agilent 7890A/5975C). Infrared spectrometry was recorded on Nicolet iS10 FT-IR (Thermo). Fluorescence emission spectra were recorded on LS-45 fluorescence spectrophotometer (PerkinElmer). Optical rotations were measured on Autopol I polarimeter (Rudolph Research Analytical) with  $[\alpha]_D$  values reported in degrees. Melting points were determined on MP70 instrument (Mettler Toledo) without correction.

## 2. [Br<sup>+</sup>] from CeBr<sub>3</sub>-H<sub>2</sub>O<sub>2</sub> system was confirmed to be HOBr.

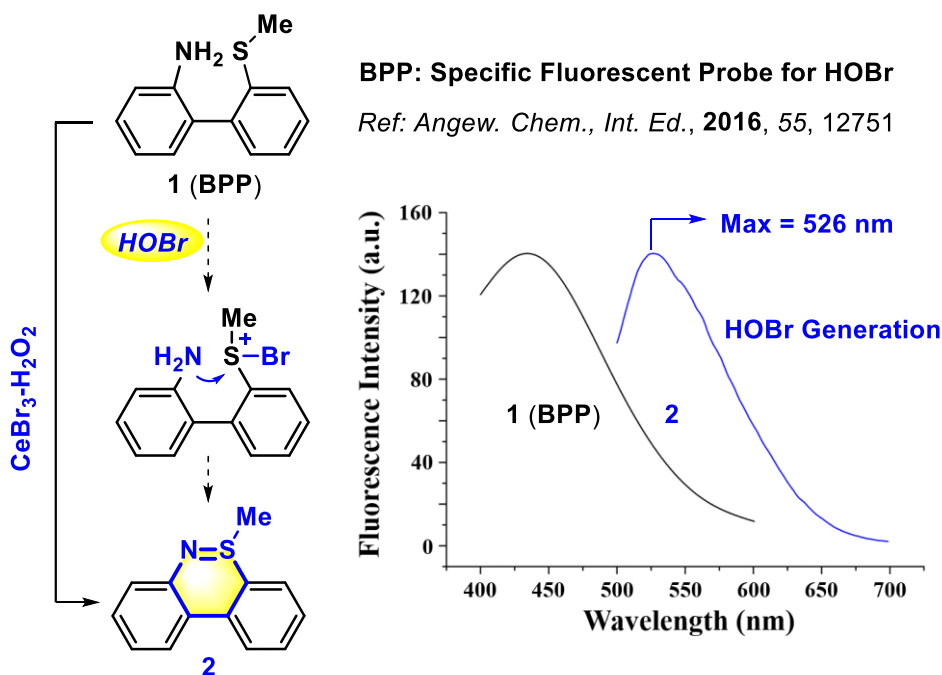

To a stirred solution of fluorescent probe **BPP**<sup>1</sup> (compound **1**, 108 mg, 0.5 mmol) in MeCN/H<sub>2</sub>O (3/1, 10 mL) were added CeBr<sub>3</sub> (56.9 mg, 0.15 mmol) and H<sub>2</sub>O<sub>2</sub> (30%, 150 μL, 1.5 mmol). After completion of the addition, the reaction mixture was stirred at room temperature (rt) for 1.5 h. The reaction was quenched by aqueous Na<sub>2</sub>S<sub>2</sub>O<sub>3</sub> solution (0.1 M, 50 mL) and ethyl acetate (50 mL). The organic fractions were collected, and the aqueous phase was extracted with ethyl acetate (2 × 20 mL). The combined organic fractions were washed with H<sub>2</sub>O, dried over Na<sub>2</sub>SO<sub>4</sub>, filtered, and concentrated under reduced pressure. Compound **2**<sup>1</sup> was purified by flash column chromatography (ethyl acetate/hexane = 1:1 to 3:1) as a gray solid (85.3 mg, 80%). M.P. 142–144 °C. <sup>1</sup>H-NMR (400 MHz, CDCl<sub>3</sub>) δ: 7.95 (d, *J* = 8.1 Hz, 1H), 7.89 (d, *J* = 8.0 Hz, 1H), 7.63–7.57 (m, 1H), 7.42 (d, *J* = 4.6 Hz, 2H), 7.34–7.27 (m, 1H), 7.22 (d, *J* = 8.2 Hz, 1H), 6.97 (t, *J* = 7.5 Hz, 1H), 2.35 (s, 3H). <sup>13</sup>C-NMR (100 MHz, CDCl<sub>3</sub>) δ: 148.7, 132.6, 131.9, 130.5, 127.6, 125.8, 124.8, 124.6, 124.3, 123.6, 120.8, 119.8, 32.1. IR 2971.9, 2895.4, 1590.2, 1563.1, 1465.4, 1413.1, 1280.4, 1218.5, 1148.6, 1109.4, 1037.1, 738.3 cm<sup>-1</sup>; HRMS (ESI<sup>+</sup>) (*m/z*) calcd. for C<sub>13</sub>H<sub>12</sub>NS [M+H]<sup>+</sup> 214.0685; found 214.0683.

Notably, no product **2** was furnished after the combination of Br<sub>2</sub> (38.4 μL, 0.75 mmol) or H<sub>2</sub>O<sub>2</sub> (30%, 150 μL, 1.5 mmol) with fluorescent probe **BPP** (108 mg, 0.5 mmol) following the above protocol (1.5 h at rt in MeCN/H<sub>2</sub>O 3/1), further indicating the specificity of fluorescent probe **BPP** for HOBr<sup>1</sup> detection.

The emission spectra of fluorescent probe **BPP** **1** (0.9 mM in MeCN, black) and **2** (7.5 mM in MeCN, blue) were got under the excitation wavelength of 375 nm and 480 nm respectively, and the emission wavelength collected were 400–600 nm (for **BPP**) and 500–700 nm (for compound **2**), which were reported in the literature<sup>1</sup>.

### 3. Optimization of the 1,3-dithiane deprotection.

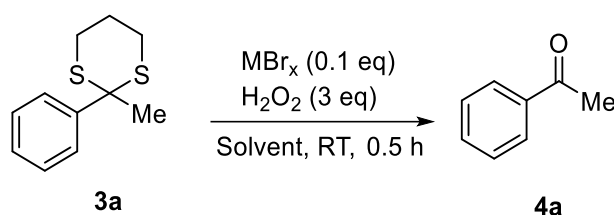

**General Procedure:** To a stirred solution of compound **3a** (21.0 mg, 0.1 mmol) in solvent (1 mL) were added  $MBr_x$  (0.01 mmol) and  $H_2O_2$  (30 wt%, 30  $\mu$ L, 0.3 mmol). After completion of the addition, the reaction mixture was allowed to stir at room temperature (rt) for 1.5 h. The reaction was quenched by dilute aqueous  $Na_2S_2O_3$  solution (0.1 M, 10 mL) and ethyl acetate (10 mL). The organic fractions were collected, and the aqueous phase was extracted with ethyl acetate ( $2 \times 10$  mL). The combined organic fractions were washed with  $H_2O$ , dried over  $Na_2SO_4$ , filtered, and concentrated under reduced pressure. Yield was determined by  $^1H$ -NMR of the crude reaction mixture using  $CH_2Br_2$  as the internal reference.

| entry <sup>a</sup>    | $MBr_x$ (0.1 eq)        | Solvent                                | Yield <sup>c</sup> (%) |
|-----------------------|-------------------------|----------------------------------------|------------------------|
| 1                     | CeBr <sub>3</sub>       | DCM/H <sub>2</sub> O (10/1)            | <5                     |
| 2                     | CeBr <sub>3</sub>       | DMSO/H <sub>2</sub> O (10/1)           | <5                     |
| 3                     | CeBr <sub>3</sub>       | DMF/H <sub>2</sub> O (10/1)            | <5                     |
| 4                     | CeBr <sub>3</sub>       | THF/H <sub>2</sub> O (10/1)            | 13                     |
| 5                     | CeBr <sub>3</sub>       | <i>n</i> -BuOH/H <sub>2</sub> O (10/1) | 32                     |
| 6                     | CeBr <sub>3</sub>       | MeCN/H <sub>2</sub> O (10/1)           | 70                     |
| 7                     | CeBr <sub>3</sub>       | EtOH/H <sub>2</sub> O (10/1)           | 75                     |
| <b>8</b>              | <b>CeBr<sub>3</sub></b> | <b>EtOH</b>                            | <b>77</b>              |
| 9                     | FeBr <sub>2</sub>       | EtOH                                   | 69                     |
| 10                    | FeBr <sub>3</sub>       | EtOH                                   | 73                     |
| <b>11<sup>b</sup></b> | <b>CeBr<sub>3</sub></b> | <b>EtOH</b>                            | <b>86</b>              |

<sup>a</sup>Reaction was carried out at rt: **3a** (0.1 mmol) was dissolved in solvent (1 mL), then CeBr<sub>3</sub>, FeBr<sub>2</sub> or FeBr<sub>3</sub> (0.01 mmol), and  $H_2O_2$  (30%, 30  $\mu$ L, 0.3 mmol) were added and stirred at rt for 1.5 h. <sup>b</sup>0.005 mmol CeBr<sub>3</sub> and 0.2 mmol  $H_2O_2$  were added, and the reaction was stirred at 40°C for 15 min. <sup>c</sup>Yield was determined by  $^1H$ -NMR of the crude reaction mixture using  $CH_2Br_2$  as the internal reference.

### 4. Preparation of thioacetals, thioketals and methylthiomethyl ether.

**4.1.** Substrates **3c**<sup>2</sup>, **3g**<sup>3</sup>, **3h**<sup>4</sup>, **3k**<sup>5</sup>, **3l**<sup>6</sup>, **3n**<sup>7</sup>, **3p-t**<sup>8</sup>, **3u**<sup>9</sup>, **3v**<sup>10</sup>, **3x**<sup>11</sup>, **3y**<sup>12</sup>, **3ab**<sup>7</sup>, **3am**<sup>13</sup>, **5a**<sup>14</sup>, **5b**<sup>15</sup> and **5n**<sup>16</sup> were prepared according to the published procedure.

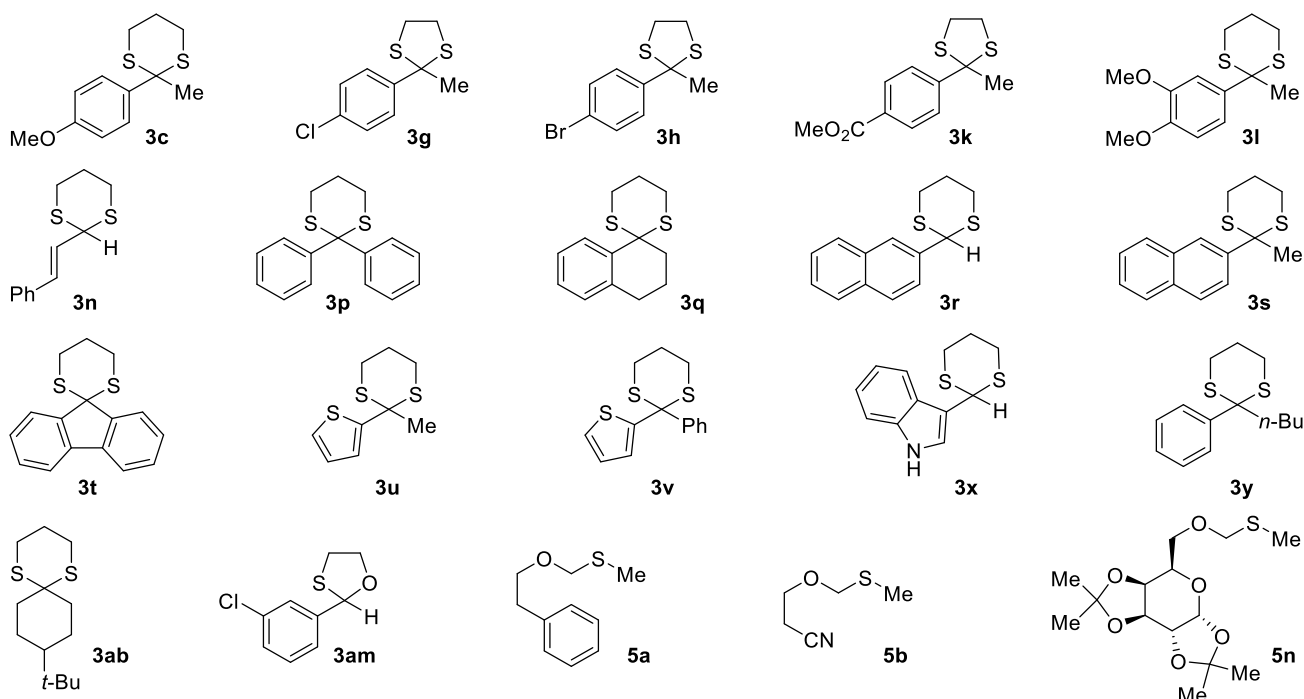

**4.2. Synthesis of 4ac and 6t:** To a stirred solution of compound **S1** or **S2** (20 mmol) in anhydrous pyridine (40 mL) or dichloromethane (DCM: 100 mL) were added acetic anhydride ( $\text{Ac}_2\text{O}$ : 9.4 mL, 100 mmol) and 4-dimethylaminopyridine (DMAP: 244 mg, 2 mmol) or *tert*-butyldimethylsilyl chloride (TBSCl: 3.01 g, 20 mmol) and imidazole (2.04 g, 30 mmol). After completion of the addition, the reaction mixture was allowed to stir at rt for 1 h. Then the mixture was quenched by cooled aqueous HCl or  $\text{NaHCO}_3$  solution and DCM (200 mL). The organic fractions were collected, and the aqueous phase was extracted with DCM ( $2 \times 100$  mL). The combined organic fractions were washed with brine, dried over  $\text{Na}_2\text{SO}_4$ , filtered, and concentrated under reduced pressure. The resulting residue was purified by flash column chromatography (ethyl acetate/hexane = 1:10 to 1:3) to give **4ac** (4.72 g, 71%) or **6t** (5.42 g, 80%). The detail spectra data was described in detail below (Part 5).

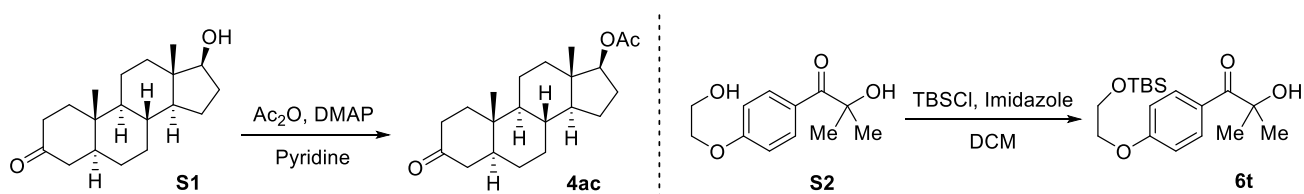

**4.3. Others** were synthesized according to “**General Procedure I or II**” as below:

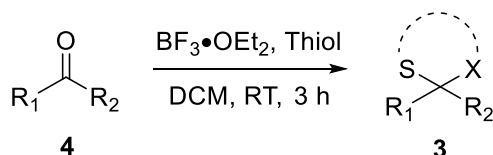

**General Procedure I:** To a stirred solution of compound **4** (8 mmol) in DCM (40 mL) were added thiol (1,3-propanedithiol, 1,2-ethanedithiol, 2-mercaptoethanol, 3-mercaptopropanol, 2-mercaptophenol, 2-aminothiophenol or L-cysteine ethyl ester hydrochloride: 8 mmol; 4-methylbenzenethiol or benzyl

mercaptan: 16 mmol) and  $\text{BF}_3 \cdot \text{OEt}_2$  (1.97 mL, 16 mmol) at rt. After completion of the addition, the reaction mixture was allowed to stir at rt for 3 h. Then the mixture was quenched by saturated aqueous  $\text{NaHCO}_3$  solution (100 mL) and  $\text{CH}_2\text{Cl}_2$  (100 mL). The organic fractions were collected, and the aqueous phase was extracted with  $\text{CH}_2\text{Cl}_2$  (3  $\times$  50 mL). The combined organic fractions were washed with brine, dried over  $\text{Na}_2\text{SO}_4$ , filtered, and concentrated under reduced pressure. The resulting residue was purified by flash column chromatography to give compound **3**.

### 2-Methyl-2-phenyl-1,3-dithiane (**3a**)

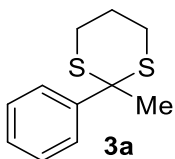

**3a**<sup>17</sup> was purified by flash column chromatography (ethyl acetate/hexane = 1:40 to 1:10) as a light-yellow oil (1.26 g, 75%). <sup>1</sup>H-NMR (400 MHz,  $\text{CDCl}_3$ )  $\delta$ : 7.96–7.91 (m, 2H), 7.38–7.33 (m, 2H), 7.26–7.21 (m, 1H), 2.76–2.64 (m, 4H), 1.95–1.89 (m, 2H), 1.78 (s, 3H). <sup>13</sup>C-NMR (100 MHz,  $\text{CDCl}_3$ )  $\delta$ : 143.8, 128.5, 127.7, 127.0, 53.9, 32.8, 28.1, 24.6. IR 3055.6, 2907.4, 1593.1, 1485.7, 1440.9, 1368.0, 1275.1, 1179.9, 1062.5, 906.6, 866.5, 760.5  $\text{cm}^{-1}$ ; HRMS (ESI<sup>+</sup>) (m/z) calcd. for  $\text{C}_{11}\text{H}_{15}\text{S}_2$  [M+H]<sup>+</sup> 211.0610; found 211.0610.

### 2-Methyl-2-(4-phenylphenyl)-1,3-dithiane (**3b**)

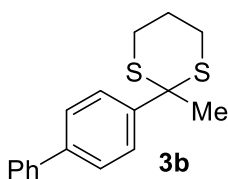

**3b** was purified by flash column chromatography (ethyl acetate/hexane = 1:40 to 1:10) as a white solid (1.83 g, 80%). M.P. 135–137 °C. <sup>1</sup>H-NMR (400 MHz,  $\text{CDCl}_3$ )  $\delta$ : 8.03–7.99 (m, 2H), 7.65–7.60 (m, 4H), 7.48–7.43 (m, 2H), 7.39–7.34 (m, 1H), 2.81–2.75 (m, 4H), 2.02–1.95 (m, 2H), 1.85 (s, 3H). <sup>13</sup>C-NMR (100 MHz,  $\text{CDCl}_3$ )  $\delta$ : 143.1, 140.7, 140.0, 128.9, 128.4, 127.5, 127.4, 127.2, 53.9, 32.9, 28.3, 24.8. IR 2878.7, 1591.8, 1478.2, 1390.6, 1275.8, 1175.3, 1069.9, 999.6, 845.7, 761.6  $\text{cm}^{-1}$ ; HRMS (ESI<sup>+</sup>) (m/z) calcd. for  $\text{C}_{17}\text{H}_{19}\text{S}_2$  [M+H]<sup>+</sup> 287.0923; found 287.0922.

### 2-Methyl-2-(4-benzyloxyphenyl)-1,3-dithiane (**3d**)

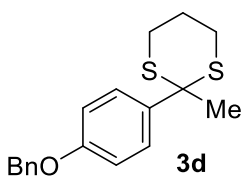

**3d** was purified by flash column chromatography (dichloromethane/hexane = 1:1 to 2:1) as a white solid (1.77 g, 70%). M.P. 98–100 °C. <sup>1</sup>H-NMR (400 MHz,  $\text{CDCl}_3$ )  $\delta$ : 7.87–7.82 (m, 2H), 7.49–7.36 (m, 5H), 7.00–6.95 (m, 2H), 5.08 (s, 2H), 2.81–2.69 (m, 4H), 1.99–1.93 (m, 2H), 1.81 (s, 3H). <sup>13</sup>C-NMR (100 MHz,  $\text{CDCl}_3$ )  $\delta$ : 158.0, 137.1, 136.2, 129.3, 128.7, 128.1, 127.7, 114.8, 70.2, 53.6, 32.3, 28.3, 24.9. IR 3030.9, 2906.3, 1600.2, 1573.8, 1498.1, 1453.7, 1383.7, 1287.4, 1236.1, 1169.8, 1070.4, 1007.1, 835.9, 736.5  $\text{cm}^{-1}$ ; HRMS (ESI<sup>+</sup>) (m/z) calcd. for  $\text{C}_{18}\text{H}_{21}\text{OS}_2$  [M+H]<sup>+</sup> 317.1028; found 317.1028.

### 2-Methyl-2-(4-acetoxyphenyl)-1,3-dithiane (**3e**)

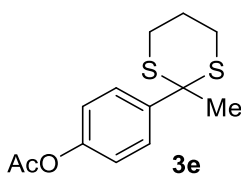

**3e**<sup>18</sup> was purified by flash column chromatography (dichloromethane/hexane = 1:1 to 2:1) as a light-yellow oil (1.70 g, 79%). <sup>1</sup>H-NMR (400 MHz,  $\text{CDCl}_3$ )  $\delta$ : 7.96–7.92 (m, 2H), 7.10–7.05 (m, 2H), 2.75–2.69 (m, 4H), 2.30 (s, 3H), 1.99–1.88 (m, 2H), 1.77 (s, 3H). <sup>13</sup>C-NMR (100 MHz,  $\text{CDCl}_3$ )  $\delta$ : 169.5, 149.7, 141.5, 129.2, 121.6,

53.7, 33.1, 28.2, 24.7, 21.3. IR 2900.7, 1763.3, 1591.2, 1494.0, 1415.5, 1363.6, 1277.8, 1189.2, 1067.1, 1011.1, 903.9, 846.3  $\text{cm}^{-1}$ ; HRMS (ESI<sup>+</sup>) (m/z) calcd. for  $\text{C}_{13}\text{H}_{17}\text{O}_2\text{S}_2$  [M+H]<sup>+</sup> 269.0664; found 269.0666.

### 2-Methyl-2-(4-fluorophenyl)-1,3-dithiolane (3f)

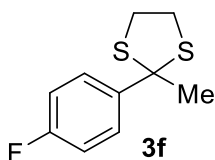

**3f** was purified by flash column chromatography (ethyl acetate/hexane = 1:40 to 1:10) as a light-yellow oil (1.37 g, 80%). <sup>1</sup>H-NMR (400 MHz,  $\text{CDCl}_3$ )  $\delta$ : 7.76–7.69 (m, 2H), 7.01–6.94 (m, 2H), 3.52–3.43 (m, 2H), 3.42–3.34 (m, 2H), 2.13 (s, 3H). <sup>13</sup>C-NMR (100 MHz,  $\text{CDCl}_3$ )  $\delta$ : 160.7 (d,  $J = 245$  Hz), 141.9 (d,  $J = 3.2$  Hz), 128.8 (d,  $J = 8$  Hz), 114.7 (d,  $J = 21.3$  Hz), 68.1, 40.6, 34.0. IR 2922.4, 1599.3, 1501.2, 1445.3, 1372.8, 1273.8, 1224.2, 1106.3, 1067.1, 1013.2, 833.6  $\text{cm}^{-1}$ ; HRMS (ESI<sup>+</sup>) (m/z) calcd. for  $\text{C}_{10}\text{H}_{12}\text{FS}_2$  [M+H]<sup>+</sup> 215.0359; found 215.0357.

### 2-Methyl-2-(4-iodophenyl)-1,3-dithiolane (3i)

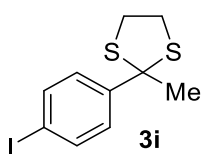

**3i** was purified by flash column chromatography (ethyl acetate/hexane = 1:40 to 1:10) as a light-yellow oil (1.86 g, 72%). <sup>1</sup>H-NMR (400 MHz,  $\text{CDCl}_3$ )  $\delta$ : 7.65–7.58 (m, 2H), 7.53–7.46 (m, 2H), 3.49–3.39 (m, 2H), 3.38–3.28 (m, 2H), 2.11 (s, 3H). <sup>13</sup>C-NMR (100 MHz,  $\text{CDCl}_3$ )  $\delta$ : 146.0, 137.0, 129.0, 92.9, 68.1, 40.5, 33.5. IR 2916.4, 1568.7, 1465.3, 1435.9, 1374.9, 1263.5, 1172.4, 1102.9, 1066.4, 817.3  $\text{cm}^{-1}$ ; HRMS (ESI<sup>+</sup>) (m/z) calcd. for  $\text{C}_{10}\text{H}_{12}\text{IS}_2$  [M+H]<sup>+</sup> 322.9420; found 322.9412.

### 2-Methyl-2-[4-(4,4,5,5-Tetramethyl-1,3,2-dioxaborolan-2-yl)phenyl]-1,3-dithiane (3j)

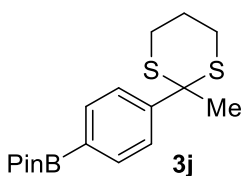

**3j** was purified by flash column chromatography (ethyl acetate/hexane = 1:40 to 1:10) as a white solid (1.78 g, 66%). M.P. 153–155 °C. <sup>1</sup>H-NMR (400 MHz,  $\text{CDCl}_3$ )  $\delta$ : 7.98–7.93 (m, 2H), 7.84–7.81 (m, 2H), 2.73–2.67 (m, 4H), 1.96–1.90 (m, 2H), 1.76 (s, 3H), 1.35 (s, 12H). <sup>13</sup>C-NMR (100 MHz,  $\text{CDCl}_3$ )  $\delta$ : 147.2, 135.3, 127.3, 84.0, 54.4, 33.0, 28.2, 25.0, 24.7. IR 2972.6, 2906.4, 1600.9, 1391.9, 1356.7, 1324.0, 1265.7, 1209.9, 1138.7, 1066.6, 1013.9, 849.8  $\text{cm}^{-1}$ ; HRMS (ESI<sup>+</sup>) (m/z) calcd. for  $\text{C}_{17}\text{H}_{26}\text{BO}_2\text{S}_2$  [M+H]<sup>+</sup> 337.1462; found 337.1468.

### 2-(2,3-dihydrobenzofuran-5-yl)-1,3-dithiane (3m)

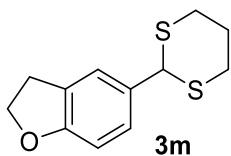

**3m** was purified by flash column chromatography (dichloromethane/hexane = 1:1 to 2:1) as a white solid (1.33 g, 70%). M.P. 167–169 °C. <sup>1</sup>H-NMR (400 MHz,  $\text{CDCl}_3$ )  $\delta$ : 7.32 (s, 1H), 7.18 (dd,  $J = 8.2, 2.0$  Hz, 1H), 6.71 (d,  $J = 8.2$  Hz, 1H), 5.11 (s, 1H), 4.52 (t,  $J = 8.7$  Hz, 2H), 3.15 (t,  $J = 8.7$  Hz, 2H), 3.08–2.99 (m, 2H), 2.91–2.84 (m, 2H), 2.18–2.11 (m, 1H), 1.95–1.83 (m, 1H). <sup>13</sup>C-NMR (100 MHz,  $\text{CDCl}_3$ )  $\delta$ : 160.3, 131.3, 127.8, 127.6, 124.4, 109.3, 71.5, 51.1, 32.3, 29.6, 25.1. IR 2926.3, 2891.1, 1602.5, 1483.4, 1417.2, 1319.8, 1275.6, 1237.0, 1174.2, 1099.0, 898.8  $\text{cm}^{-1}$ ; HRMS (ESI<sup>+</sup>) (m/z) calcd. for  $\text{C}_{12}\text{H}_{15}\text{OS}_2$  [M+H]<sup>+</sup> 239.0559; found 239.0550.

### 2-(2-ethynylphenyl)-1,3-dithiane (3o)

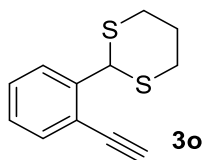

THF (40 mL) was used as the reaction solvent instead of DCM, and **3o** was purified by flash column chromatography (dichloromethane/hexane = 1:1 to 2:1) as a white solid (1.15 g, 65%). M.P. 102–104 °C. <sup>1</sup>H-NMR (400 MHz, CDCl<sub>3</sub>) δ: 7.65 (dd, *J* = 7.9, 1.2 Hz, 1H), 7.47 (dd, *J* = 7.7, 1.4 Hz, 1H), 7.34 (td, *J* = 7.6, 1.4 Hz, 1H), 7.22 (td, *J* = 7.6, 1.4 Hz, 1H), 5.73 (s, 1H), 3.37 (s, 1H), 3.14–3.05 (m, 2H), 2.87 (dt, *J* = 14.4, 4.2 Hz, 2H), 2.20–2.10 (m, 1H), 1.99–1.86 (m, 1H). <sup>13</sup>C-NMR (100 MHz, CDCl<sub>3</sub>) δ: 141.0, 133.1, 129.6, 128.14, 128.09, 120.7, 82.2, 80.9, 48.9, 32.3, 25.2. IR 3236.8, 3048.4, 2945.9, 2891.1, 2103.2, 1475.4, 1443.1, 1271.2, 1243.2, 1191.3, 756.9 cm<sup>-1</sup>; HRMS (ESI<sup>+</sup>) (*m/z*) calcd. for C<sub>12</sub>H<sub>13</sub>S<sub>2</sub> [M+H]<sup>+</sup> 221.0453; found 221.0452.

### 2-(benzofuran-2-yl)-1,3-dithiane (**3w**)

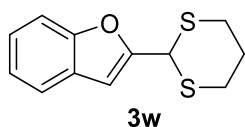

**3w** was purified by flash column chromatography (ethyl acetate/hexane = 1:40 to 1:10) as a light-yellow oil (1.40 g, 74%). <sup>1</sup>H-NMR (400 MHz, CDCl<sub>3</sub>) δ: 7.50 (d, *J* = 7.5 Hz, 1H), 7.45 (d, *J* = 8.1 Hz, 1H), 7.28–7.22 (m, 1H), 7.22–7.16 (m, 1H), 6.77 (s, 1H), 5.26 (s, 1H), 3.02–2.94 (m, 2H), 2.93–2.85 (m, 2H), 2.14–2.04 (m, 1H), 2.04–1.92 (m, 1H). <sup>13</sup>C-NMR (100 MHz, CDCl<sub>3</sub>) δ: 154.7, 154.6, 128.0, 124.5, 122.9, 121.0, 111.3, 104.7, 41.9, 29.8, 25.2. IR 3087.7, 2901.8, 1583.8, 1446.1, 1419.2, 1341.4, 1273.4, 1244.7, 1199.0, 1159.7, 1124.6, 1005.2, 748.4 cm<sup>-1</sup>; HRMS (ESI<sup>+</sup>) (*m/z*) calcd. for C<sub>12</sub>H<sub>13</sub>OS<sub>2</sub> [M+H]<sup>+</sup> 237.0402; found 237.0399.

### 2,2-Dipentyl-1,3-dithiane (**3z**)

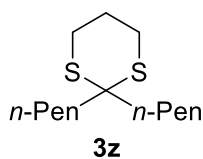

**3z**<sup>19</sup> was purified by flash column chromatography (ethyl acetate/hexane = 1:40 to 1:10) as a light-yellow oil (1.50 g, 72%). <sup>1</sup>H-NMR (400 MHz, CDCl<sub>3</sub>) δ: 2.77–2.74 (m, 4H), 1.92–1.88 (m, 2H), 1.82–1.79 (m, 4H), 1.40–1.35 (m, 4H), 1.32–1.27 (m, 4H), 1.27–1.22 (m, 4H), 0.85 (t, *J* = 4.0 Hz, 6H). <sup>13</sup>C-NMR (100 MHz, CDCl<sub>3</sub>) δ: 52.4, 37.1, 31.0, 25.0, 24.7, 22.7, 21.6, 13.1. IR 2930.2, 2860.7, 1458.2, 1421.8, 1376.4, 1272.9, 1239.0, 1120.4, 907.5, 734.5 cm<sup>-1</sup>; HRMS (ESI<sup>+</sup>) (*m/z*) calcd. for C<sub>14</sub>H<sub>29</sub>S<sub>2</sub> [M+H]<sup>+</sup> 261.1705; found 261.1704.

### 9-Phenyl-1,5-dithiaspiro[5.5]undecane (**3aa**)

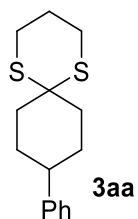

**3aa**<sup>20</sup> was purified by flash column chromatography (ethyl acetate/hexane = 1:40 to 1:10) as a white solid (1.44 g, 68%). M.P. 110–112 °C; <sup>1</sup>H-NMR (400 MHz, CDCl<sub>3</sub>) δ: 7.31–7.26 (m, 2H), 7.25–7.21 (m, 2H), 7.21–7.16 (m, 1H), 2.93–2.89 (m, 2H), 2.80–2.75 (m, 2H), 2.50 (tt, *J* = 12.1, 3.7 Hz, 1H), 2.50–2.44 (m, 2H), 2.05–1.94 (m, 4H), 1.87–1.78 (m, 2H), 1.76–1.69 (m, 2H). <sup>13</sup>C-NMR (100 MHz, CDCl<sub>3</sub>) δ: 146.7, 128.5, 127.0, 126.3, 49.8, 44.3, 38.2, 29.7, 26.4, 25.9. IR 3018.4, 2918.7, 1596.0, 1487.4, 1417.4, 1268.8, 1232.2, 1099.8, 1066.0, 993.0, 831.9, 755.2 cm<sup>-1</sup>; HRMS (ESI<sup>+</sup>) (*m/z*) calcd. for C<sub>15</sub>H<sub>21</sub>S<sub>2</sub> [M+H]<sup>+</sup> 265.1079; found 265.1076.



### (5S)-17-Acetyl-4,5-dihydrotestosterone Cyclic 1,3-Propanediyl Dithioacetal (**3ac**)

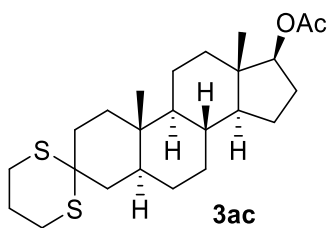

**3ac** was purified by flash column chromatography (ethyl acetate/hexane = 1:40 to 1:10) as a white solid (2.03 g, 60%). M.P. 213–215 °C. <sup>1</sup>H-NMR (400 MHz, CDCl<sub>3</sub>) δ: 4.57 (t, *J* = 8.5 Hz, 1H), 2.90–2.84 (m, 2H), 2.76–2.71 (m, 2H), 2.23–2.08 (m, 2H), 2.02 (s, 3H), 2.00–1.93 (m, 2H), 1.92–1.78 (m, 2H), 1.73–1.53 (m, 6H), 1.52–1.38 (m, 4H), 1.33–1.19 (m, 4H), 1.18–0.88 (m, 4H), 0.80 (s, 3H), 0.76 (s, 3H). <sup>13</sup>C-NMR (100 MHz, CDCl<sub>3</sub>) δ: 171.3, 83.0,

54.1, 50.9, 50.6, 42.8, 41.5, 40.6, 37.0, 36.6, 35.4, 34.6, 34.0, 31.5, 28.1, 27.7, 26.41, 26.35, 26.1, 23.6, 21.3, 20.6, 12.2, 12.0. IR 2920.5, 2851.3, 1722.8, 1439.0, 1378.6, 1246.6, 1028.3 cm<sup>-1</sup>; HRMS (ESI<sup>+</sup>) (*m/z*) calcd. for C<sub>24</sub>H<sub>39</sub>O<sub>2</sub>S<sub>2</sub> [M+H]<sup>+</sup> 423.2386; found 423.2388. [α]<sub>D</sub><sup>25</sup> = +21 (*c* 1, CHCl<sub>3</sub>).

### 1-(Bisbenzylthio)indane (**3ad**)

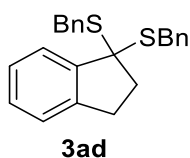

InCl<sub>3</sub> (177 mg, 0.8 mmol) was used as the reaction solvent instead of BF<sub>3</sub>•OEt<sub>2</sub>, and **3ad** was purified by flash column chromatography (ethyl acetate/hexane = 1:40 to 1:10) as a light-yellow oil (1.45 g, 50%). <sup>1</sup>H-NMR (400 MHz, CDCl<sub>3</sub>) δ: 7.28–7.16 (m, 14H), 3.89 (d, *J* = 12.0 Hz, 2H), 3.71 (d, *J* = 12.0 Hz, 2H), 2.96 (t, *J* = 6.9 Hz, 2H), 2.44 (t, *J* = 6.9

Hz, 2H). <sup>13</sup>C-NMR (100 MHz, CDCl<sub>3</sub>) δ: 144.0, 142.8, 137.4, 129.3, 128.6, 128.4, 127.1, 126.5, 125.5, 123.9, 67.7, 43.1, 36.0, 30.6. IR 2936.2, 2879.2, 1616.9, 1407.2, 1321.9, 1162.9, 1117.5, 1013.0, 758.9, 710.6 cm<sup>-1</sup>; HRMS (ESI<sup>+</sup>) (*m/z*) calcd. for C<sub>23</sub>H<sub>23</sub>S<sub>2</sub> [M+H]<sup>+</sup> 363.1236; found 363.1223.

### 1-[Bis(4-tolylthio)methyl]-4-*tert*-butylbenzene (**3ae**)

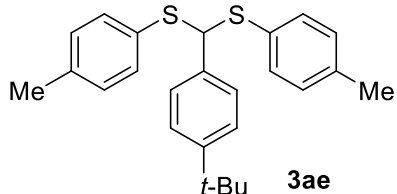

**3ae** was purified by flash column chromatography (ethyl acetate/hexane = 1:40 to 1:10) as a white solid (2.39 g, 76%). M.P. 84–86 °C. <sup>1</sup>H-NMR (400 MHz, CDCl<sub>3</sub>) δ: 7.28–7.20 (m, 8H), 7.03 (d, *J* = 7.8 Hz, 4H), 5.31 (s, 1H), 2.30 (s, 6H), 1.29 (s, 9H). <sup>13</sup>C-NMR (100 MHz, CDCl<sub>3</sub>) δ: 151.0, 138.0, 137.0, 133.1, 131.4, 129.7, 127.6, 125.5,

61.3, 34.7, 31.5, 21.3. IR 2959.1, 2864.1, 1600.8, 1487.9, 1401.0, 1360.7, 1265.9, 1213.2, 1084.3, 1015.4, 800.4 cm<sup>-1</sup>; HRMS (ESI<sup>+</sup>) (*m/z*) calcd. for C<sub>25</sub>H<sub>28</sub>NaS<sub>2</sub> [M+Na]<sup>+</sup> 415.1525; found 415.1534.

### 1-[Bis(4-tolylthio)methyl]-4-methoxybenzene (**3af**)

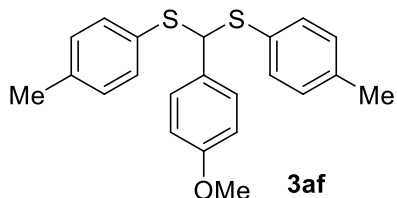

**3af**<sup>21</sup> was purified by flash column chromatography (ethyl acetate/hexane = 1:40 to 1:10) as a light-yellow oil (2.11 g, 72%). <sup>1</sup>H-NMR (400 MHz, CDCl<sub>3</sub>) δ: 7.31–7.24 (m, 6H), 7.05 (d, *J* = 7.9 Hz, 4H), 6.78–6.83 (m, 2H), 5.33 (s, 1H), 3.80 (s, 3H), 2.32 (s, 6H). <sup>13</sup>C-NMR (100 MHz, CDCl<sub>3</sub>) δ: 159.3, 138.0, 133.1, 132.1, 131.2,

129.7, 129.2, 113.8, 60.7, 55.4, 21.3. IR 2919.6, 1605.7, 1501.7, 1452.4, 1301.2, 1247.4, 1098.2, 1028.6, 835.9 cm<sup>-1</sup>; HRMS (ESI<sup>+</sup>) (*m/z*) calcd. for C<sub>22</sub>H<sub>22</sub>NaOS<sub>2</sub> [M+Na]<sup>+</sup> 389.1004; found 389.0998.

### 1-[Bis(4-tolylthio)methyl]-4-phenylbenzene (**3ag**)

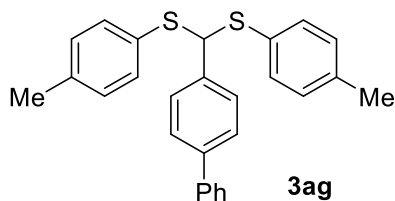

**3ag** was purified by flash column chromatography (ethyl acetate/hexane = 1:40 to 1:10) as a white solid (2.48 g, 75%). M.P. 113–115 °C. <sup>1</sup>H-NMR (400 MHz, DMSO) δ: 7.67–7.58 (m, 4H), 7.56–7.51 (m, 2H), 7.43 (t, *J* = 7.4 Hz, 2H), 7.38–7.33 (m, 1H), 7.29 (d, *J* = 8.0 Hz, 4H), 7.10 (d, *J* = 8.0 Hz, 4H), 6.00 (s, 1H), 2.25 (s, 6H).

<sup>13</sup>C-NMR (100 MHz, DMSO) δ: 139.6, 139.4, 138.5, 137.2, 131.5, 130.5, 129.6, 128.9, 128.4, 127.6, 126.6, 57.1, 20.6. IR 3023.1, 2918.1, 1599.7, 1482.0, 1444.8, 1399.8, 1176.5, 1106.3, 1008.9, 838.2, 758.3 cm<sup>-1</sup>; HRMS (ESI<sup>+</sup>) (*m/z*) calcd. for C<sub>27</sub>H<sub>24</sub>NaS<sub>2</sub> [M+Na]<sup>+</sup> 435.1212; found 435.1208.

### 1-[Bis(2-Hydroxyethyl)thio]pyrene (**3ah**)

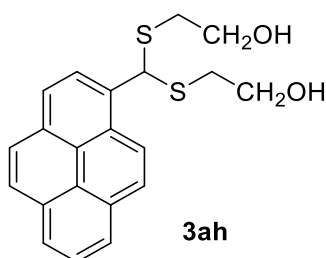

TsOH (800 mg, 4.64 mmol) was used instead of BF<sub>3</sub>•OEt<sub>2</sub>, and the mixture was refluxed with 2-mercaptoethanol (1.69 mL, 24 mmol) in EtOH for 24 h under nitrogen atmosphere. **3ah**<sup>22</sup> was purified by flash column chromatography (ethyl acetate/hexane = 1:5 to 2:1) as a yellow solid (2.21 g, 75%). M.P. 132–134 °C. <sup>1</sup>H-NMR (400 MHz, DMSO) δ: 8.65 (d, *J* = 9.4 Hz, 1H), 8.40–8.24 (m, 5H), 8.21–8.14 (m, 2H), 8.06 (t, *J* = 7.6 Hz, 1H), 6.43 (s, 1H), 4.80 (t, *J* = 5.4 Hz, 2H), 3.60–3.49 (m, 4H), 2.85–2.76 (m, 2H), 2.70–

2.62 (m, 2H). <sup>13</sup>C-NMR (100 MHz, DMSO) δ: 134.4, 130.8, 130.3, 130.2, 127.54, 127.46, 127.3, 126.4, 126.0, 125.5, 125.3, 124.9, 124.1, 123.9, 60.8, 35.0. IR 3221.3, 2912.0, 1592.9, 1394.2, 1284.6, 1231.6, 1161.3, 1004.6, 823.2 cm<sup>-1</sup>; HRMS (ESI<sup>+</sup>) (*m/z*) calcd. for C<sub>21</sub>H<sub>20</sub>NaO<sub>2</sub>S<sub>2</sub> [M+Na]<sup>+</sup> 391.0797; found 391.0789.

### 1-Oxa-5-thiaspiro[5.11]heptadecane (**3ai**)

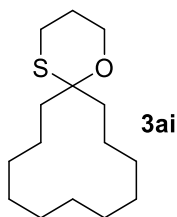

THF (40 mL) was used as the reaction solvent instead of DCM, and **3ai** was purified by flash column chromatography (ethyl acetate/hexane = 1:20 to 1:5) as a light-yellow oil (1.23 g, 60%). M.P. 59–61 °C. <sup>1</sup>H-NMR (400 MHz, CDCl<sub>3</sub>) δ: 3.81 (t, *J* = 5.4 Hz, 2H), 2.86–2.82 (m, 2H), 2.17–2.08 (m, 2H), 1.83–1.68 (m, 4H), 1.34 (m, 18H). <sup>13</sup>C-NMR (100 MHz, CDCl<sub>3</sub>) δ: 85.5, 61.9, 33.3, 26.3, 26.2, 25.7, 24.1, 22.5, 22.1, 19.3. IR 2909.4, 2853.6, 1468.0, 1439.6, 1211.9, 1074.0, 1021.3, 722.1 cm<sup>-1</sup>; HRMS (ESI<sup>+</sup>) (*m/z*) calcd.

for C<sub>15</sub>H<sub>29</sub>OS [M+H]<sup>+</sup> 257.1934; found 257.1929.

### 2-[2-(Ethoxycarbonyl)ethyl]-2-methyl-1,3-oxathiane (**3aj**)

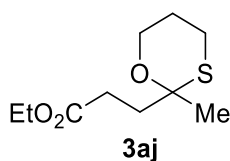

THF (40 mL) was used as the reaction solvent instead of DCM, and **3aj** was purified by flash column chromatography (ethyl acetate/petroleum ether = 1:20 to 1:5) as a light-yellow oil (1.36 g, 78%). <sup>1</sup>H-NMR (400 MHz, CDCl<sub>3</sub>) δ: 4.03 (q, *J* = 7.1 Hz, 2H), 3.83–3.72 (m, 2H), 2.82–2.76 (m, 2H), 2.46–2.32 (m, 2H), 2.23–2.03 (m, 2H),

1.74–1.67 (m, 2H), 1.48 (s, 3H), 1.17 (t, *J* = 7.2 Hz, 3H). <sup>13</sup>C-NMR (100 MHz, CDCl<sub>3</sub>) δ: 173.5, 80.7, 61.9,

60.4, 35.4, 29.1, 26.1, 25.1, 24.3, 14.2. IR 2939.4, 2873.1, 1729.8, 1438.2, 1373.7, 1171.7, 1094.4, 1015.8  $\text{cm}^{-1}$ ; HRMS (ESI<sup>+</sup>) (m/z) calcd. for  $\text{C}_{10}\text{H}_{19}\text{O}_3\text{S}$  [M+H]<sup>+</sup> 219.1049; found 219.1039.

### 2-(2,4-Dichlorophenyl)-1,3-oxathiane (3ak)

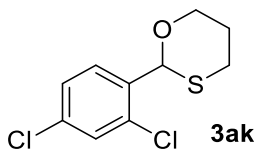

THF (40 mL) was used as the reaction solvent instead of DCM, and **3ak** was purified by flash column chromatography (ethyl acetate/hexane = 1:40 to 1:10) as a white solid (1.46 g, 73%). M.P. 60–62 °C. <sup>1</sup>H-NMR (400 MHz,  $\text{CDCl}_3$ )  $\delta$ : 7.62 (d,  $J = 8.4$  Hz, 1H), 7.34 (d,  $J = 2.1$  Hz, 1H), 7.27 (dd,  $J = 8.4, 2.2$  Hz, 1H), 6.03 (s, 1H), 4.36–4.29 (m, 1H), 3.79 (td,  $J = 12.5, 2.2$  Hz, 1H), 3.21 (td,  $J = 13.2, 2.8$  Hz, 1H), 2.86–2.79 (m, 1H), 2.18–2.05 (m, 1H), 1.82–1.74 (m, 1H). <sup>13</sup>C-NMR (100 MHz,  $\text{CDCl}_3$ )  $\delta$ : 135.9, 134.8, 132.0, 129.7, 129.2, 127.7, 80.7, 70.9, 29.3, 25.7. IR 2912.8, 2865.5, 1585.1, 1465.8, 1376.8, 1342.9, 1227.9, 1072.8, 852.5, 752.1  $\text{cm}^{-1}$ ; HRMS (ESI<sup>+</sup>) (m/z) calcd. for  $\text{C}_{10}\text{H}_{11}\text{Cl}_2\text{OS}$  [M+H]<sup>+</sup> 248.9902; found 248.9896.

### 2-Methyl-2-(4-trifluoromethylphenyl)-1,3-oxathiolane (3al)

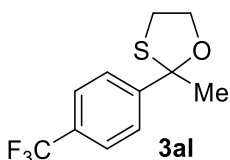

THF (40 mL) was used as the reaction solvent instead of DCM, and **3al** was purified by flash column chromatography (ethyl acetate/hexane = 1:40 to 1:10) as a light-yellow oil (1.41 g, 71%). <sup>1</sup>H-NMR (400 MHz,  $\text{CDCl}_3$ )  $\delta$ : 7.63 (d,  $J = 4.7$  Hz, 2H), 7.59 (d,  $J = 5.1$  Hz, 2H), 4.38–4.34 (m, 1H), 4.04–4.00 (m, 1H), 3.25–3.21 (m, 1H), 3.09–3.05 (m, 1H), 1.92 (s, 3H). <sup>13</sup>C-NMR (100 MHz,  $\text{CDCl}_3$ )  $\delta$ : 151.1, 129.2 (q,  $J = 18.4$  Hz), 125.4, 125.2 (q,  $J = 2.1$  Hz), 121.9 (q,  $J = 155$  Hz), 95.0, 71.0, 34.6, 32.2. IR 2980.1, 2879.2, 1616.9, 1407.2, 1321.9, 1162.8, 1117.6, 1067.9, 1013.0, 840.4  $\text{cm}^{-1}$ ; HRMS (ESI<sup>+</sup>) (m/z) calcd. for  $\text{C}_{11}\text{H}_{12}\text{F}_3\text{OS}$  [M+H]<sup>+</sup> 249.0555; found 249.0567.

### 2-Ethyl-2-(6-methoxynaphthalen-2-yl)-1,3-oxathiolane (3an)

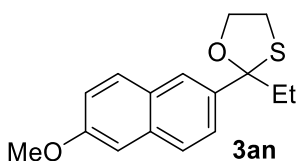

THF (40 mL) was used as the reaction solvent instead of DCM, and **3an** was purified by flash column chromatography (ethyl acetate/hexane = 1:40 to 1:10) as a light-yellow oil (1.54 g, 70%). <sup>1</sup>H-NMR (400 MHz,  $\text{CDCl}_3$ )  $\delta$ : 7.93 (d,  $J = 1.2$  Hz, 1H), 7.78 (d,  $J = 5.2$  Hz, 1H), 7.74 (d,  $J = 4.9$  Hz, 1H), 7.54 (dd,  $J = 4.9, 1.1$  Hz, 1H), 7.20 (dd,  $J = 5.1, 1.5$  Hz, 1H), 7.16 (d,  $J = 1.6$  Hz, 1H), 4.42–4.39 (m, 1H), 4.04–4.00 (m, 1H), 3.92 (s, 3H), 3.21–3.16 (m, 1H), 3.08–3.04 (m, 1H), 2.26 (q,  $J = 4.1$  Hz, 2H), 0.97 (t,  $J = 4.2$  Hz, 3H). <sup>13</sup>C-NMR (100 MHz,  $\text{CDCl}_3$ )  $\delta$ : 157.8, 140.4, 133.7, 129.7, 128.3, 126.8, 124.8, 123.8, 118.9, 105.5, 100.0, 70.7, 55.2, 37.4, 34.0, 9.8. IR 3055.1, 2927.4, 2871.1, 1599.1, 1473.2, 1378.9, 1335.2, 1220.3, 1122.3, 1024.7, 884.9  $\text{cm}^{-1}$ ; HRMS (ESI<sup>+</sup>) (m/z) calcd. for  $\text{C}_{16}\text{H}_{19}\text{O}_2\text{S}$  [M+H]<sup>+</sup> 275.1100; found 275.1096.

### 2-(Anthracen-9-yl)benzothiazoline (3ao)

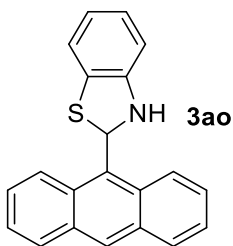

EtOH (40 mL) was used as the reaction solvent instead of DCM, and no  $\text{BF}_3 \cdot \text{OEt}_2$  was needed. **3ao** was purified by flash column chromatography (dichloromethane/hexane = 1:5 to 1:2) as a yellow solid (1.63 g, 65%). M.P. 126–128 °C.  $^1\text{H-NMR}$  (400 MHz,  $\text{CDCl}_3$ )  $\delta$ : 8.75 (d,  $J = 8.1$  Hz, 2H), 8.48 (s, 1H), 8.12 (s, 1H), 8.05–7.99 (m, 2H), 7.53–7.45 (m, 4H), 7.18 (dd,  $J = 7.6, 1.2$  Hz, 1H), 7.01 (td,  $J = 7.6, 1.3$  Hz, 1H), 6.85 (td,  $J = 7.6, 1.2$  Hz, 1H), 6.67 (dd,  $J = 7.8, 1.2$  Hz, 1H), 4.42 (s, 1H).  $^{13}\text{C-NMR}$  (100 MHz,  $\text{CDCl}_3$ )  $\delta$ : 146.7, 131.7, 130.7, 130.1, 129.6, 128.0, 127.9, 126.2, 125.9, 125.1, 124.4, 122.1, 121.0, 110.5, 65.7. IR 3337.9, 3040.1, 1576.7, 1447.7, 1366.9, 1072.6, 1015.9, 844.1, 731.8  $\text{cm}^{-1}$ ; HRMS (ESI<sup>+</sup>) (m/z) calcd. for  $\text{C}_{21}\text{H}_{16}\text{NS}$   $[\text{M}+\text{H}]^+$  314.0998; found 314.1012.

### 2-(*n*-Heptyl)benzothiazoline (**3ap**)

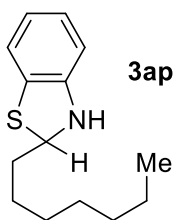

EtOH (40 mL) was used as the reaction solvent instead of DCM, and no  $\text{BF}_3 \cdot \text{OEt}_2$  was needed. **3ap**<sup>23</sup> was purified by flash column chromatography (dichloromethane/hexane = 1:5 to 1:2) as a light-yellow oil (1.32 g, 70%).  $^1\text{H-NMR}$  (400 MHz,  $\text{CDCl}_3$ )  $\delta$ : 7.06 (dd,  $J = 7.6, 1.3$  Hz, 1H), 6.89 (td,  $J = 7.6, 1.4$  Hz, 1H), 6.72 (td,  $J = 7.5, 1.2$  Hz, 1H), 6.63 (dd,  $J = 7.8, 1.2$  Hz, 1H), 5.25 (t,  $J = 6.6$  Hz, 1H), 3.99 (s, 1H), 1.91–1.85 (m, 2H), 1.43–1.29 (m, 10H), 0.89 (t,  $J = 7.0$  Hz, 3H).  $^{13}\text{C-NMR}$  (100 MHz,  $\text{CDCl}_3$ )  $\delta$ : 146.7, 127.6, 125.2, 122.0, 120.8, 110.9, 69.0, 38.7, 31.8, 29.33, 29.25, 26.2, 22.7, 14.2. IR 3298.3, 2920.6, 2850.9, 1583.0, 1462.7, 1400.6, 1366.5, 1211.3, 1118.0, 1019.5, 736.5  $\text{cm}^{-1}$ ; HRMS (ESI<sup>+</sup>) (m/z) calcd. for  $\text{C}_{14}\text{H}_{22}\text{NS}$   $[\text{M}+\text{H}]^+$  236.1467; found 236.1472.

### 2-(3-Bromo-4-fluorophenyl)-2-methyl-1,3-benzoxathiole (**3aq**)

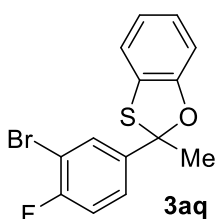

$\text{CHCl}_3$  (40 mL) was used as the reaction solvent instead of DCM, and the mixture was refluxed under nitrogen for 3 h. **3aq** was purified by flash column chromatography (ethyl acetate/hexane = 1:40 to 1:10) as a light-yellow oil (1.56 g, 60%).  $^1\text{H-NMR}$  (400 MHz,  $\text{CDCl}_3$ )  $\delta$ : 7.81 (dd,  $J = 6.4, 2.4$  Hz, 1H), 7.49 (ddd,  $J = 8.6, 4.5, 2.4$  Hz, 1H), 7.13–7.04 (m, 3H), 6.98–6.89 (m, 2H), 2.14 (s, 3H).  $^{13}\text{C-NMR}$  (100 MHz,  $\text{CDCl}_3$ )  $\delta$ : 157.5 (d,  $J = 247$  Hz), 154.6, 142.2 (d,  $J = 3.7$  Hz), 130.4, 126.3, 125.9, 125.8 (d,  $J = 7.5$  Hz), 122.9, 122.2, 116.2 (d,  $J = 22.5$  Hz), 111.0, 109.0 (d,  $J = 21.1$  Hz), 98.3, 31.1. IR 1579.4, 1491.9, 1456.9, 1384.7, 1228.9, 1083.4, 1045.5, 1017.0, 852.7, 739.7  $\text{cm}^{-1}$ ; HRMS (ESI<sup>+</sup>) (m/z) calcd. for  $\text{C}_{14}\text{H}_{11}\text{BrFOS}$   $[\text{M}+\text{H}]^+$  324.9693; found 324.9690.

### 2-Ethyl-2-(3-fluorophenyl)-1,3-benzoxathiole (**3ar**)

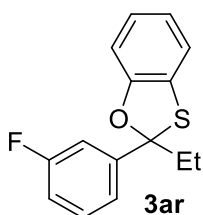

$\text{CHCl}_3$  (40 mL) was used as the reaction solvent instead of DCM, and the mixture was refluxed under nitrogen for 3 h. **3ar** was purified by flash column chromatography (ethyl acetate/hexane = 1:40 to 1:10) as a light-yellow oil (1.35 g, 65%).  $^1\text{H-NMR}$  (400 MHz,  $\text{CDCl}_3$ )  $\delta$ : 7.30–7.19 (m, 3H), 7.04 (dd,  $J = 7.6, 1.4$  Hz, 1H), 7.02–6.90 (m, 3H), 6.82 (td,  $J = 7.5, 1.3$  Hz, 1H), 2.44–2.24 (m, 2H), 0.96 (t,  $J = 7.3$  Hz, 3H).  $^{13}\text{C-NMR}$

(100 MHz, CDCl<sub>3</sub>)  $\delta$ : 161.5 (d,  $J$  = 245 Hz), 155.2, 146.7 (d,  $J$  = 6.6 Hz), 129.9 (d,  $J$  = 8.1 Hz), 126.0, 125.8, 122.6, 122.1, 120.8 (d,  $J$  = 2.9 Hz), 114.8 (d,  $J$  = 21.1 Hz), 112.4 (d,  $J$  = 23.2 Hz), 110.6, 102.7 (d,  $J$  = 1.9 Hz), 36.7, 9.3. IR 2935.2, 1585.8, 1458.3, 1229.1, 1119.9, 862.9, 781.6, 739.4 cm<sup>-1</sup>; HRMS (ESI<sup>+</sup>) (m/z) calcd. for C<sub>13</sub>H<sub>14</sub>FOS [M+H]<sup>+</sup> 261.0744; found 261.0757.

### 2-(4-Bromophenyl)benzothiazoline (3as)

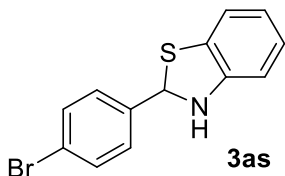

EtOH (40 mL) was used as the reaction solvent instead of DCM, and no BF<sub>3</sub>•OEt<sub>2</sub> was needed. **3as** was purified by flash column chromatography (ethyl acetate/hexane = 1:40 to 1:10) as a yellow solid (1.64 g, 70%). M.P. 81–83 °C. <sup>1</sup>H-NMR (400 MHz, CDCl<sub>3</sub>)  $\delta$ : 7.50–7.46 (m, 2H), 7.42–7.38 (m, 2H), 7.04 (dd,  $J$  = 7.6, 1.3 Hz, 1H), 6.96 (td,  $J$  = 7.7, 1.3 Hz, 1H), 6.77 (td,  $J$  = 7.5, 1.2 Hz, 1H), 6.65 (dd,  $J$  = 7.7, 1.2 Hz, 1H), 6.30 (s, 1H), 4.03 (s, 1H). <sup>13</sup>C-NMR (100 MHz, CDCl<sub>3</sub>)  $\delta$ : 146.1, 140.9, 131.9, 128.3, 126.3, 125.7, 122.7, 121.7, 120.9, 110.0, 69.3. IR 3342.5, 1576.4, 1461.9, 1391.1, 1250.2, 1064.1, 826.1, 746.6 cm<sup>-1</sup>; HRMS (ESI<sup>+</sup>) (m/z) calcd. for C<sub>13</sub>H<sub>11</sub>BrNS [M+H]<sup>+</sup> 291.9790; found 291.9789.

### 2-Methyl-2-(6-methoxynaphthalen-2-yl)-1,3-benzoxathiole (3at)

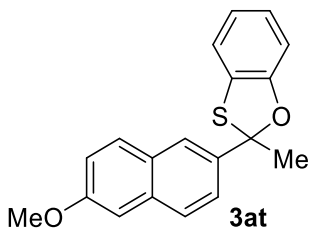

THF (40 mL) was used as the reaction solvent instead of DCM, and **3at** was purified by flash column chromatography (ethyl acetate/hexane = 1:40 to 1:10) as a white solid (1.83 g, 74%). M.P. 122–124 °C. <sup>1</sup>H-NMR (400 MHz, CDCl<sub>3</sub>)  $\delta$ : 7.99 (d,  $J$  = 2.0 Hz, 1H), 7.76 (d,  $J$  = 8.7 Hz, 2H), 7.68 (dd,  $J$  = 8.6, 2.0 Hz, 1H), 7.18 (dd,  $J$  = 8.9, 2.5 Hz, 1H), 7.16–7.13 (m, 2H), 7.11–7.06 (m, 1H), 7.02 (dd,  $J$  = 8.0, 1.4 Hz, 1H), 6.90 (td,  $J$  = 7.4, 1.4 Hz, 1H), 3.93 (s, 3H), 2.29 (s, 3H). <sup>13</sup>C-NMR (100 MHz, CDCl<sub>3</sub>)  $\delta$ : 158.3, 155.1, 139.3, 134.3, 130.0, 128.2, 127.3, 126.6, 126.0, 124.0, 123.3, 122.5, 122.1, 119.3, 110.9, 105.8, 99.8, 55.4, 31.0. IR 2963.1, 1600.9, 1454.0, 1368.9, 1268.9, 1232.1, 1198.7, 1089.4, 1027.8, 841.8, 742.2 cm<sup>-1</sup>; HRMS (ESI<sup>+</sup>) (m/z) calcd. for C<sub>19</sub>H<sub>17</sub>O<sub>2</sub>S [M+H]<sup>+</sup> 309.0944; found 309.0941.

### (2*RS*,4*R*) Ethyl-2-(4-methylphenyl)thiazolidine-4-carboxylate (3au)

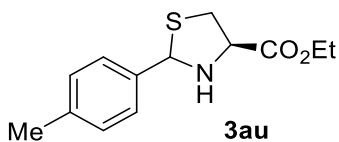

EtOH (40 mL) was used as the reaction solvent instead of DCM, and Et<sub>3</sub>N (1.11 mL, 8 mmol) was added. **3au**<sup>24</sup> was purified by flash column chromatography (ethyl acetate/hexane = 1:5 to 1:2) as a light-yellow oil (1.51 g, 75%). <sup>1</sup>H-NMR (400 MHz, CDCl<sub>3</sub>)  $\delta$ : 7.44–7.35 (m, 2H), 7.19–7.11 (m, 2H), 5.81–5.52 (m, 1H), 4.30–4.21 (m, 2H), 4.21–3.93 (m, 1H), 3.48–3.35 (m, 1H), 3.22–3.07 (m, 1H), 2.69 (s, 1H), 2.36–2.32 (m, 3H), 1.33–1.27 (m, 3H). <sup>13</sup>C-NMR (100 MHz, CDCl<sub>3</sub>)  $\delta$ : 171.8, 171.2, 138.6, 138.3, 137.6, 135.2, 129.4, 129.1, 127.4, 126.9, 72.6, 70.8, 65.7, 64.4, 61.7, 61.6, 39.3, 38.2, 21.2, 21.1, 14.2. IR 3312.5, 2926.5, 1734.2, 1512.8, 1449.1, 1374.1, 1266.3, 1190.4, 1094.2, 1025.5, 763.0 cm<sup>-1</sup>; HRMS (ESI<sup>+</sup>) (m/z) calcd. for C<sub>13</sub>H<sub>18</sub>NO<sub>2</sub>S [M+H]<sup>+</sup> 252.1053; found 252.1061.

**(2*RS*,4*R*) Ethyl-2-(2-fluorophenyl)thiazolidine-4-carboxylate (3av)**

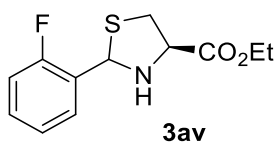

EtOH (40 mL) was used as the reaction solvent instead of DCM, and Et<sub>3</sub>N (1.11 mL, 8 mmol) was added. **3av** was purified by flash column chromatography (ethyl acetate/hexane = 1:5 to 1:2) as a light-yellow oil (0.92 g, 45%). <sup>1</sup>H-NMR (400 MHz, CDCl<sub>3</sub>) δ: 7.64–7.49 (m, 1H), 7.35–7.21 (m, 1H), 7.19–7.00 (m, 2H), 6.04–5.78 (m, 1H), 4.30–4.24 (m, 2H), 4.24–3.93 (m, 1H), 3.50–3.37 (m, 1H), 3.17–3.08 (m, 1H), 2.82 (s, 1H), 1.34–1.29 (m, 3H). <sup>13</sup>C-NMR (100 MHz, CDCl<sub>3</sub>) δ: 171.6, 171.1, 159.5 (d, *J* = 247 Hz), 159.2 (d, *J* = 246 Hz), 130.3 (d, *J* = 8.5 Hz), 129.4 (d, *J* = 12.3 Hz), 129.3 (d, *J* = 8.1 Hz), 128.6 (d, *J* = 3.3 Hz), 127.2 (d, *J* = 3.6 Hz), 125.3 (d, *J* = 12.5 Hz), 124.6 (d, *J* = 3.5 Hz), 124.1 (d, *J* = 3.5 Hz), 115.8 (d, *J* = 21.7 Hz), 115.5 (d, *J* = 21.1 Hz), 65.8, 65.7 (d, *J* = 3.7 Hz), 64.8, 64.3 (d, *J* = 2.2 Hz), 61.82, 61.79, 39.2, 38.0, 14.2. IR 3319.3, 2981.4, 1732.5, 1585.7, 1487.0, 1454.9, 1374.6, 1265.0, 1192.1, 1090.0, 1025.9, 753.6 cm<sup>-1</sup>; HRMS (ESI<sup>+</sup>) (*m/z*) calcd. for C<sub>12</sub>H<sub>15</sub>FNO<sub>2</sub>S [M+H]<sup>+</sup> 256.0802; found 256.0811.

**(2*RS*,4*R*) Ethyl-2-(3-methoxyphenyl)thiazolidine-4-carboxylate (3aw)**

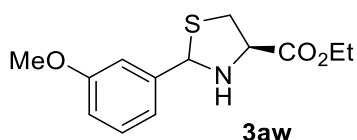

EtOH (40 mL) was used as the reaction solvent instead of DCM, and Et<sub>3</sub>N (1.11 mL, 8 mmol) was added. **3aw** was purified by flash column chromatography (ethyl acetate/hexane = 1:5 to 1:2) as a light-yellow oil (1.07 g, 50%). <sup>1</sup>H-NMR (400 MHz, CDCl<sub>3</sub>) δ: 7.30–7.21 (m, 1H), 7.13–7.04 (m, 2H), 6.89–6.78 (m, 1H), 5.82–5.52 (m, 1H), 4.29–4.21 (m, 2H), 4.19–3.93 (m, 1H), 3.82–3.79 (m, 3H), 3.48–3.35 (m, 1H), 3.19–3.07 (m, 1H), 2.67 (s, 1H), 1.34–1.28 (m, 3H). <sup>13</sup>C-NMR (100 MHz, CDCl<sub>3</sub>) δ: 171.8, 171.2, 159.9, 159.7, 143.2, 139.8, 129.8, 129.5, 119.8, 119.3, 114.4, 113.4, 113.0, 112.5, 72.6, 70.8, 65.8, 64.5, 61.8, 61.7, 55.4, 55.3, 39.3, 38.3, 14.2. IR 3313.8, 2934.5, 1733.3, 1595.0, 1458.4, 1373.2, 1255.3, 1154.5, 1039.1, 758.1 cm<sup>-1</sup>; HRMS (ESI<sup>+</sup>) (*m/z*) calcd. for C<sub>13</sub>H<sub>18</sub>NO<sub>3</sub>S [M+H]<sup>+</sup> 268.1002; found 268.1012.

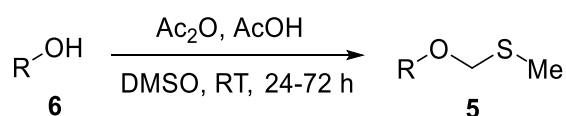

**General Procedure II:** To a solution of compound **6** (6.5 mmol) in dimethyl sulfoxide (20 mL) was added a mixture of acetic anhydride (14 mL) and acetic acid (2.5 mL) at rt. After completion of the addition, the mixture was allowed to stand for 24–72 h (primary alcohol: 24 h; secondary alcohol: 48 h; tertiary alcohol: 72 h). Then the mixture was quenched by saturated aqueous NaHCO<sub>3</sub> solution (200 mL) and ethyl acetate (100 mL). The organic fractions were collected, and the aqueous phase was extracted with ethyl acetate (3 × 50 mL). The combined organic fractions were washed with brine, dried over Na<sub>2</sub>SO<sub>4</sub>, filtered, and concentrated under reduced pressure. The resulting residue was purified by flash column chromatography to give compound **5**.

**Methylthiomethyl 2-phenoxyethyl ether (5c)**

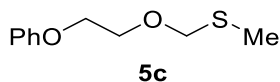

**5c** was purified by flash column chromatography (ethyl acetate/hexane = 1:40 to 1:10) as a light-yellow oil (0.97 g, 75%). <sup>1</sup>H-NMR (400 MHz, CDCl<sub>3</sub>) δ: 7.28–7.23 (m, 2H), 6.95–6.90 (m, 3H), 4.72 (s, 2H), 4.12 (t, *J* = 4.6 Hz, 2H), 3.88 (t, *J* = 4.8 Hz, 2H), 2.15 (s, 3H). <sup>13</sup>C-NMR (100 MHz, CDCl<sub>3</sub>) δ: 158.8, 129.5, 121.0, 114.7, 75.6, 67.1, 66.3, 13.9. IR 2922.2, 1742.0, 1594.6, 1493.0, 1430.0, 1369.6, 1299.1, 1241.8, 1212.4, 1174.3, 1085.1, 1022.9, 959.4, 922.2, 840.6, 752.9, 607.8, 509.7, 464.3 cm<sup>-1</sup>; HRMS (ESI<sup>+</sup>) (*m/z*) calcd. for C<sub>10</sub>H<sub>15</sub>O<sub>2</sub>S [M+H]<sup>+</sup> 199.0787; found 199.0786.

#### Cyclohexylmethyl methylthiomethyl ether (**5d**)

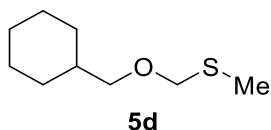

**5d** was purified by flash column chromatography (ethyl acetate/hexane = 1:40 to 1:10) as a light-yellow oil (0.76 g, 67%). <sup>1</sup>H-NMR (400 MHz, CDCl<sub>3</sub>) δ: 4.61 (s, 2H), 3.30 (d, *J* = 7.8 Hz, 2H), 2.13 (s, 3H), 1.77–1.67 (m, 5H), 1.60–1.54 (m, 1H), 1.26–1.16 (m, 3H), 0.99–0.89 (m, 2H). <sup>13</sup>C-NMR (100 MHz, CDCl<sub>3</sub>) δ: 75.4, 74.0, 37.9, 30.2, 26.7, 26.0, 13.9. IR 2919.9, 2850.1, 1445.0, 1299.1, 1260.0, 1068.3, 956.6, 882.2, 728.9, 678.9 cm<sup>-1</sup>; HRMS (ESI<sup>+</sup>) (*m/z*) calcd. for C<sub>9</sub>H<sub>19</sub>OS [M+H]<sup>+</sup> 175.1151; found 175.1154.

#### Cyclopentylmethyl methylthiomethyl ether (**5e**)

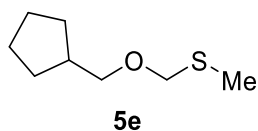

**5e** was purified by flash column chromatography (ethyl acetate/hexane = 1:40 to 1:10) as a light-yellow oil (0.89 g, 85%). <sup>1</sup>H-NMR (400 MHz, CDCl<sub>3</sub>) δ: 4.60 (s, 2H), 3.36 (d, *J* = 7.0 Hz, 2H), 2.14–2.08 (m, 4H), 1.76–1.68 (m, 2H), 1.60–1.47 (m, 4H), 1.24–1.19 (m, 2H). <sup>13</sup>C-NMR (100 MHz, CDCl<sub>3</sub>) δ: 75.4, 72.8, 39.3, 29.8, 25.6, 13.9. IR 2948.4, 2863.9, 1434.8, 1299.5, 1256.9, 1070.2, 960.0, 923.7, 728.7, 678.7 cm<sup>-1</sup>; HRMS (ESI<sup>+</sup>) (*m/z*) calcd. for C<sub>8</sub>H<sub>20</sub>NOS [M+NH<sub>4</sub>]<sup>+</sup> 178.1260; found 178.1253.

#### Methylthiomethyl *n*-undecanyl ether (**5f**)

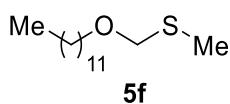

**5f** was purified by flash column chromatography (ethyl acetate/hexane = 1:40 to 1:10) as a light-yellow oil (1.35 g, 84%). <sup>1</sup>H-NMR (400 MHz, CDCl<sub>3</sub>) δ: 4.63 (s, 2H), 3.52 (t, *J* = 6.5 Hz, 2H), 2.15 (s, 3H), 1.62–1.55 (m, 2H), 1.32–1.26 (m, 18H), 0.89 (t, *J* = 6.5 Hz, 3H). <sup>13</sup>C-NMR (100 MHz, CDCl<sub>3</sub>) δ: 75.3, 68.3, 32.0, 29.78, 29.75, 29.72, 29.56, 29.52, 29.47, 26.4, 22.8, 14.2, 14.0. IR 2921.6, 2853.3, 1461.8, 1381.1, 1299.4, 1081.6, 952.9, 726.3, 679.7 cm<sup>-1</sup>; HRMS (ESI<sup>+</sup>) (*m/z*) calcd. for C<sub>14</sub>H<sub>31</sub>OS [M+H]<sup>+</sup> 247.2090; found 247.2096.

#### 3-[(*tert*-Butyloxycarbonyl)amino]propanyl methylthiomethyl ether (**5g**)

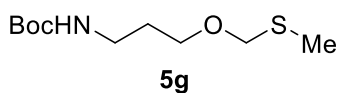

**5g** was purified by flash column chromatography (ethyl acetate/hexane = 1:20 to 1:5) as a light-yellow oil (1.16 g, 76%). <sup>1</sup>H-NMR (400 MHz, CDCl<sub>3</sub>) δ: 4.81 (s, 1H), 4.59 (s, 2H), 3.54 (t, *J* = 6.0 Hz, 2H), 3.23–3.18 (m, 2H), 2.12 (s, 3H), 1.78–1.72 (m, 2H), 1.41 (s, 9H). <sup>13</sup>C-NMR (100 MHz, CDCl<sub>3</sub>) δ: 156.1, 79.1, 75.5, 66.3, 38.5, 29.6, 28.5, 14.1. IR 3357.9, 2925.7, 1693.2, 1511.7, 1447.5, 1391.5, 1364.8, 1246.3, 1166.8, 1072.9, 859.7, 779.1, 728.6, 678.5 cm<sup>-1</sup>; HRMS (ESI<sup>+</sup>) (*m/z*) calcd. for C<sub>10</sub>H<sub>22</sub>NO<sub>3</sub>S [M+H]<sup>+</sup> 236.1315; found 236.1313.

### 3-(3-Trifluoromethylphenyl)propanyl methylthiomethyl ether (**5h**)

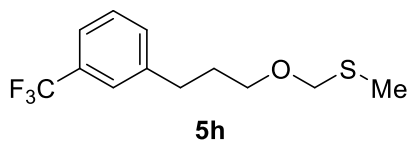

**5h** was purified by flash column chromatography (ethyl acetate/hexane = 1:40 to 1:10) as a light-yellow oil (1.53 g, 89%) as colorless oil. <sup>1</sup>H-NMR (400 MHz, CDCl<sub>3</sub>) δ: 7.46–7.38 (m, 4H), 4.64 (s, 2H), 3.53 (t, *J* = 6.1 Hz, 2H), 2.76 (t, *J* = 7.7 Hz, 2H), 2.17 (s, 3H), 1.90 (p, *J* = 6.7 Hz, 2H). <sup>13</sup>C-NMR (100 MHz, CDCl<sub>3</sub>) δ: 142.9, 132.0, 130.3 (q, *J* = 32.0 Hz), 128.9, 125.3 (q, *J* = 4.0 Hz), 122.8 (q, *J* = 4.0 Hz), 120.3 (q, *J* = 270.0 Hz), 75.5, 67.2, 32.4, 31.0, 14.2. IR 2924.4, 1744.4, 1442.0, 1326.4, 1210.6, 1162.4, 1121.3, 1068.2, 1017.9, 959.7, 907.4, 800.3, 732.7, 701.1, 458.8 cm<sup>-1</sup>; HRMS (ESI<sup>+</sup>) (m/z) calcd. for C<sub>12</sub>H<sub>16</sub>F<sub>3</sub>OS [M+H]<sup>+</sup> 265.0868; found 265.0876.

### 2-(Naphthalen-1-yl)ethyl methylthiomethyl ether (**5i**)

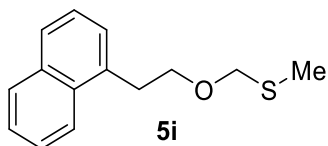

**5i** was purified by flash column chromatography (ethyl acetate/hexane = 1:40 to 1:10) as a light-yellow oil (1.22 g, 81%). <sup>1</sup>H-NMR (400 MHz, CDCl<sub>3</sub>) δ: 8.09 (d, *J* = 8.3 Hz, 1H), 7.87 (d, *J* = 8.0 Hz, 1H), 7.75 (d, *J* = 9.4 Hz, 1H), 7.57–7.49 (m, 2H), 7.46–7.41 (m, 2H), 4.67 (s, 2H), 3.90 (t, *J* = 7.2 Hz, 2H), 3.40 (t, *J* = 7.2 Hz, 2H), 2.11 (s, 3H). <sup>13</sup>C-NMR (100 MHz, CDCl<sub>3</sub>) δ: 134.8, 133.9, 132.2, 128.9, 127.2, 126.9, 126.1, 125.61, 125.59, 123.8, 75.4, 68.3, 33.1, 14.0. IR 3046.2, 2916.7, 1727.2, 1594.8, 1510.1, 1431.4, 1392.6, 1299.2, 1258.9, 1163.6, 1062.2, 955.8, 862.1, 775.0, 728.8, 678.0, 596.5, 520.6, 478.0, 422.3 cm<sup>-1</sup>; HRMS (ESI<sup>+</sup>) (m/z) calcd. for C<sub>14</sub>H<sub>16</sub>NaOS [M+Na]<sup>+</sup> 255.0814; found 255.0810.

### Cyclohexyl methylthiomethyl ether (**5j**)

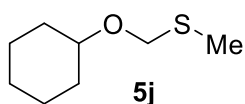

**5j**<sup>25</sup> was purified by flash column chromatography (ethyl acetate/hexane = 1:40 to 1:10) as a light-yellow oil (0.78 g, 75%). <sup>1</sup>H-NMR (400 MHz, CDCl<sub>3</sub>) δ: 4.63 (s, 2H), 3.61–3.56 (m, 1H), 2.14 (s, 3H), 1.88–1.83 (m, 2H), 1.73–1.69 (m, 2H), 1.54–1.50 (m, 1H), 1.25 (t, *J* = 9.7 Hz, 5H). <sup>13</sup>C-NMR (100 MHz, CDCl<sub>3</sub>) δ: 74.5, 72.0, 32.1, 25.9, 24.3, 13.9. IR 2927.1, 2855.1, 1444.5, 1298.0, 1263.2, 1060.9, 931.2, 890.3, 792.7, 728.5, 677.5 cm<sup>-1</sup>; HRMS (ESI<sup>+</sup>) (m/z) calcd. for C<sub>8</sub>H<sub>17</sub>OS [M+H]<sup>+</sup> 161.0995; found 161.0993.

### Tetrahydropyran-4-yl methylthiomethyl ether (**5k**)

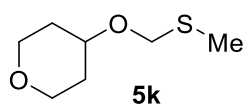

**5k** was purified by flash column chromatography (ethyl acetate/hexane = 1:40 to 1:10) as a light-yellow oil (0.97 g, 92%). <sup>1</sup>H-NMR (400 MHz, CDCl<sub>3</sub>) δ: 4.63 (s, 2H), 3.87 (dt, *J* = 11.7, 4.4 Hz, 2H), 3.85–3.81 (m, 1H), 3.45–3.39 (m, 2H), 2.12 (s, 3H), 1.86–1.81 (m, 2H), 1.60–1.51 (m, 2H). <sup>13</sup>C-NMR (100 MHz, CDCl<sub>3</sub>) δ: 71.8, 70.7, 65.7, 32.2, 13.8. IR 2922.6, 2846.8, 1743.6, 1435.3, 1366.7, 1296.9, 1155.5, 1067.9, 1004.2, 947.1, 858.9, 818.5, 728.7, 678.0, 599.6, 515.6 cm<sup>-1</sup>; HRMS (ESI<sup>+</sup>) (m/z) calcd. for C<sub>7</sub>H<sub>15</sub>O<sub>2</sub>S [M+H]<sup>+</sup> 163.0787; found 163.0784.

### *trans*-1-[(*tert*-Butyloxycarbonyl)amino]-4-methylthiomethoxy cyclohexane (**5l**)



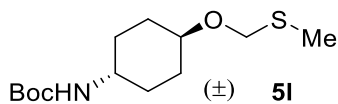

**5I** was purified by flash column chromatography (ethyl acetate/hexane = 1:20 to 1:5) as a light-yellow oil (1.32 g, 74%) as white solid. M.P. 92–94 °C; <sup>1</sup>H-NMR (400 MHz, CDCl<sub>3</sub>) δ: 4.64 (s, 2H), 4.44 (s, 1H), 3.61–3.55 (m, 1H), 3.44 (s, 1H), 2.15 (s, 3H), 2.05–1.97 (m, 4H), 1.44 (s, 9H), 1.39–1.35 (m, 2H), 1.21–1.15 (m, 2H). <sup>13</sup>C-NMR (100 MHz, CDCl<sub>3</sub>) δ: 155.3, 79.3, 73.7, 72.3, 49.0, 31.2, 30.4, 28.5, 13.8. IR 3320.8, 2976.9, 2931.6, 2860.4, 1676.0, 1522.4, 1445.2, 1365.5, 1310.0, 1271.2, 1229.5, 1164.3, 1076.5, 1038.5, 962.2, 926.7, 896.2, 856.6, 785.9, 735.4, 677.4, 646.4, 463.0 cm<sup>-1</sup>; HRMS (ESI<sup>+</sup>) (m/z) calcd. for C<sub>13</sub>H<sub>26</sub>NO<sub>3</sub>S [M+H]<sup>+</sup> 276.1628; found 276.1624.

#### (1*R*,2*S*,5*R*) 2-Isopropyl-5-methyl-1-methylthiomethoxy cyclohexane (**5m**)

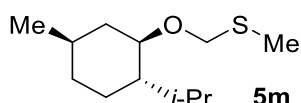

**5m**<sup>26</sup> was purified by flash column chromatography (ethyl acetate/hexane = 1:40 to 1:10) as a light-yellow oil (1.01 g, 72%) as colorless oil. <sup>1</sup>H-NMR (400 MHz, CDCl<sub>3</sub>) δ: 4.62 (dd, *J* = 15.4, 11.4 Hz, 2H), 3.36 (td, *J* = 10.5, 4.2 Hz, 1H), 2.21–2.15 (m, 1H), 2.14 (s, 3H), 2.10–2.05 (m, 1H), 1.65–1.61 (m, 2H), 1.36–1.33 (m, 1H), 1.23–1.20 (m, 1H), 1.00–0.88 (m, 8H), 0.86–0.84 (m, 1H), 0.79 (d, *J* = 7.0 Hz, 3H). <sup>13</sup>C-NMR (100 MHz, CDCl<sub>3</sub>) δ: 75.9, 72.4, 48.4, 40.0, 34.6, 31.6, 25.4, 23.2, 22.4, 21.3, 15.9, 14.2. IR 2951.9, 2919.6, 2868.8, 1452.7, 1374.2, 1297.2, 1179.6, 1051.4, 1005.0, 959.3, 918.0, 839.5, 729.3, 678.5, 512.7 cm<sup>-1</sup>; HRMS (ESI<sup>+</sup>) (m/z) calcd. for C<sub>12</sub>H<sub>25</sub>OS [M+H]<sup>+</sup> 217.1621; found 217.1613. [α]<sub>D</sub><sup>25</sup> = -228 (*c* 0.1, EtOH).

#### (1*S*,2*R*)-1,7,7-Trimethylbicyclo[2.2.1]heptan-2-yl methylthiomethyl ether (**5o**)

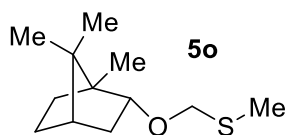

**5o** was purified by flash column chromatography (ethyl acetate/hexane = 1:40 to 1:10) as a light-yellow oil (0.53 g, 38%). <sup>1</sup>H-NMR (400 MHz, CDCl<sub>3</sub>) δ: 4.69–4.51 (m, 2H), 3.92 (ddd, *J* = 9.5, 3.2, 1.8 Hz, 1H), 2.14–2.10 (m, 4H), 1.97–1.90 (m, 1H), 1.74–1.68 (m, 1H), 1.62 (t, *J* = 4.6 Hz, 1H), 1.24–1.19 (m, 2H), 0.98 (dd, *J* = 13.0, 3.4 Hz, 1H), 0.86–0.83 (m, 9H). <sup>13</sup>C-NMR (100 MHz, CDCl<sub>3</sub>) δ: 81.6, 74.0, 49.0, 47.9, 45.2, 35.9, 28.3, 27.0, 19.8, 19.0, 13.9, 13.7. IR 2947.3, 1450.2, 1368.8, 1301.0, 1261.9, 1112.7, 1062.9, 818.6, 728.7, 678.4, 473.3 cm<sup>-1</sup>; HRMS (ESI<sup>+</sup>) (m/z) calcd. for C<sub>12</sub>H<sub>22</sub>NaOS [M+Na]<sup>+</sup> 237.1284; found 237.1282. [α]<sub>D</sub><sup>25</sup> = -160 (*c* 0.1, EtOH).

#### 1,1-Dimethyl-2-phenylethyl methylthiomethyl ether (**5p**)

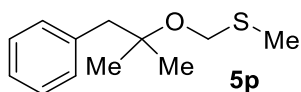

**5p** was purified by flash column chromatography (ethyl acetate/hexane = 1:40 to 1:10) as a light-yellow oil (0.74 g, 54%). <sup>1</sup>H-NMR (400 MHz, CDCl<sub>3</sub>) δ: 7.26–7.20 (m, 5H), 4.56 (s, 2H), 2.81 (s, 2H), 2.16 (s, 3H), 1.19 (s, 6H). <sup>13</sup>C-NMR (100 MHz, CDCl<sub>3</sub>) δ: 138.1, 130.7, 127.9, 126.3, 77.1, 66.9, 47.9, 25.2, 14.4. IR 3028.1, 2973.1, 2919.5, 1494.2, 1449.7, 1372.8, 1302.7, 1219.8, 1130.7, 1040.6, 856.3, 763.6, 698.8, 610.6, 514.6, 468.5 cm<sup>-1</sup>; HRMS (ESI<sup>+</sup>) (m/z) calcd. for C<sub>12</sub>H<sub>19</sub>OS [M+H]<sup>+</sup> 211.1151; found 211.1149.

#### 3,7,7-Trimethyl-7-methylthiomethoxy heptaldehyde (**5q**)

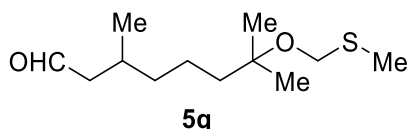

**5q** was purified by flash column chromatography (ethyl acetate/hexane = 1:40 to 1:10) as a light-yellow oil (0.91 g, 60%). <sup>1</sup>H-NMR (400 MHz, CDCl<sub>3</sub>) δ: 9.74 (t, *J* = 2.3 Hz, 1H), 4.48 (s, 2H), 2.36 (ddd, *J* = 16.1, 5.7, 2.0 Hz, 1H), 2.24 (td, *J* = 8.1, 2.5 Hz, 1H), 2.18 (s, 3H), 2.10–2.02 (m, 1H), 1.48–1.29 (m, 6H), 1.19 (s, 6H), 0.95 (d, *J* = 6.7 Hz, 3H). <sup>13</sup>C-NMR (100 MHz, CDCl<sub>3</sub>) δ: 203.1, 76.6, 66.8, 51.2, 41.0, 37.4, 28.3, 25.73, 25.71, 21.4, 20.1, 14.6. IR 2926.4, 2716.2, 1723.0, 1462.3, 1371.9, 1304.9, 1213.1, 1151.5, 1045.1, 961.7, 733.9, 683.4 cm<sup>-1</sup>; HRMS (ESI<sup>+</sup>) (*m/z*) calcd. for C<sub>12</sub>H<sub>24</sub>NaO<sub>2</sub>S [M+Na]<sup>+</sup> 255.1389; found 255.1389.

### 1-Ethyl-1,5-dimethylhexyl methylthiomethyl ether (**5r**)

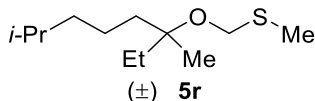

**5r** was purified by flash column chromatography (ethyl acetate/hexane = 1:40 to 1:10) as a light-yellow oil (0.75 g, 53%). <sup>1</sup>H-NMR (400 MHz, CDCl<sub>3</sub>) δ: 4.44 (s, 2H), 2.18 (s, 3H), 1.55–1.50 (m, 3H), 1.45–1.41 (m, 2H), 1.30–1.28 (m, 2H), 1.16–1.14 (m, 5H), 0.87–0.85 (m, 9H). <sup>13</sup>C-NMR (100 MHz, CDCl<sub>3</sub>) δ: 78.9, 66.2, 39.7, 38.1, 30.8, 28.0, 22.8, 22.75, 22.73, 21.4, 14.6, 8.1. IR 2949.1, 1462.0, 1374.5, 1300.5, 1154.3, 1042.0, 872.3, 733.2, 683.2 cm<sup>-1</sup>; HRMS (ESI<sup>+</sup>) (*m/z*) calcd. for C<sub>12</sub>H<sub>27</sub>OS [M+H]<sup>+</sup> 219.1777; found 219.1775.

### 1-Adamantyl methylthiomethyl ether (**5s**)

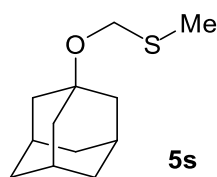

**5s**<sup>27</sup> was purified by flash column chromatography (ethyl acetate/hexane = 1:40 to 1:10) as a light-yellow oil (1.02 g, 74%). <sup>1</sup>H-NMR (400 MHz, CDCl<sub>3</sub>) δ: 4.58 (s, 2H), 2.17 (s, 3H), 2.14 (s, 3H), 1.79 (d, *J* = 2.8 Hz, 6H), 1.62–1.60 (m, 6H). <sup>13</sup>C-NMR (100 MHz, CDCl<sub>3</sub>) δ: 74.1, 65.7, 41.9, 36.4, 30.6, 14.4. IR 2906.3, 2850.6, 1446.8, 1353.4, 1298.5, 1104.9, 1073.4, 1035.9, 905.6, 875.8, 813.9, 777.6, 679.3, 548.9, 464.9 cm<sup>-1</sup>; HRMS (ESI<sup>+</sup>) (*m/z*) calcd. for C<sub>12</sub>H<sub>21</sub>OS [M+H]<sup>+</sup> 213.1308; found 213.1301.

### 1-[4-[2-(*tert*-Butyldimethylsilyloxy)ethoxy]phenyl]-2-methyl-2-methylthiomethoxypropan-1-one (**5t**)

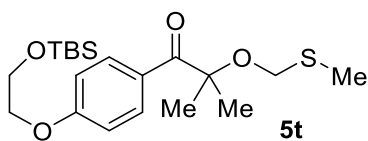

**5t** was purified by flash column chromatography (ethyl acetate/hexane = 1:40 to 1:10) as a light-yellow oil (2.31 g, 89%) as colorless oil. <sup>1</sup>H-NMR (400 MHz, CDCl<sub>3</sub>) δ: 8.28 (d, *J* = 5.2 Hz, 2H), 6.92 (d, *J* = 5.1 Hz, 2H), 4.45 (s, 2H), 4.10 (d, *J* = 3.0 Hz, 2H), 3.99–3.98 (m, 2H), 2.06 (s, 3H), 1.57 (s, 6H), 0.90 (s, 9H), 0.10 (s, 6H). <sup>13</sup>C-NMR (100 MHz, CDCl<sub>3</sub>) δ: 201.0, 162.8, 132.6, 127.5, 114.1, 83.8, 69.9, 69.6, 62.0, 26.0, 25.6, 18.5, 15.3, -5.1. IR 2929.3, 1742.6, 1670.7, 1598.3, 1506.0, 1427.0, 1371.0, 1254.7, 1211.6, 1159.7, 1129.4, 1014.4, 958.7, 912.1, 834.5, 775.6, 697.5, 599.3, 560.5, 516.5, 463.1 cm<sup>-1</sup>; HRMS (ESI<sup>+</sup>) (*m/z*) calcd. for C<sub>20</sub>H<sub>35</sub>O<sub>4</sub>SSi [M+H]<sup>+</sup> 399.2020; found 399.2008.

### 2-(Thiophen-2-yl)ethyl methylthiomethyl ether (**5u**)

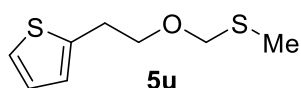

**5u** was purified by flash column chromatography (dichloromethane/hexane = 1:2 to 1:1) as a light-yellow oil (0.43 g, 35%). <sup>1</sup>H-NMR (400 MHz, CDCl<sub>3</sub>) δ:

7.14 (dd,  $J = 5.1, 1.2$  Hz, 1H), 6.93 (dd,  $J = 5.1, 3.4$  Hz, 1H), 6.88–6.86 (m, 1H), 4.66 (s, 2H), 3.77 (t,  $J = 6.6$  Hz, 2H), 3.11 (t,  $J = 7.3$  Hz, 2H), 2.12 (s, 3H).  $^{13}\text{C}$ -NMR (100 MHz,  $\text{CDCl}_3$ )  $\delta$ : 141.3, 126.8, 125.3, 123.8, 75.4, 68.6, 30.3, 14.1. IR 3071.5, 2856.1, 1761.7, 1431.4, 1300.7, 1201.8, 1083.0, 1050.1, 985.7, 954.2, 825.3, 688.3, 476.6  $\text{cm}^{-1}$ ; HRMS (ESI<sup>+</sup>) ( $m/z$ ) calcd. for  $\text{C}_8\text{H}_{13}\text{OS}_2$   $[\text{M}+\text{H}]^+$  189.0402; found 189.0404.

### 5. Deprotections of thioacetals, thioketals and methylthiomethyl ether.

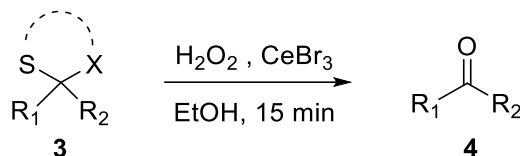

**General Procedure III:** To a stirred solution of compound **3** (1 mmol) in ethanol (EtOH: 10 mL) were added  $\text{CeBr}_3$  (19.0 mg, 0.05 mmol) and 30%  $\text{H}_2\text{O}_2$  (200  $\mu\text{L}$ , 2 mmol) at rt. After completion of the addition, the resulting mixture was allowed to stir at 40  $^\circ\text{C}$  for 15 min. Then the mixture was quenched by aqueous  $\text{Na}_2\text{S}_2\text{O}_3$  (0.1 M, 40 mL) and ethyl acetate (50 mL). The organic fractions were collected, and the aqueous phase was extracted with ethyl acetate (3  $\times$  20 mL). The combined organic fractions were washed with brine, dried over  $\text{Na}_2\text{SO}_4$ , filtered, and concentrated under reduced pressure. The residue was purified by flash column chromatography to give compound **4**.

#### Acetophenone (**4a**)

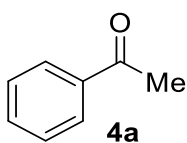

**4a**<sup>28</sup> was purified by flash column chromatography (ethyl acetate/hexane = 1:10 to 1:3) as a light-yellow oil (103 mg, 86%).  $^1\text{H}$ -NMR (400 MHz,  $\text{CDCl}_3$ )  $\delta$ : 7.98–7.93 (m, 2H), 7.59–7.53 (m, 1H), 7.44 (t,  $J = 7.9$  Hz, 2H), 2.60 (s, 3H).  $^{13}\text{C}$ -NMR (100 MHz,  $\text{CDCl}_3$ )  $\delta$ : 198.3, 137.3, 133.2, 128.7, 128.4, 26.7. IR 3062.1, 1680.2, 1593.2, 1445.1, 1357.9, 1179.6, 758.2  $\text{cm}^{-1}$ ; HRMS (ESI<sup>+</sup>) ( $m/z$ ) calcd. for  $\text{C}_8\text{H}_8\text{O}$   $[\text{M}+\text{H}]^+$  121.0648; found 121.0649.

#### 4'-Phenylacetophenone (**4b**)

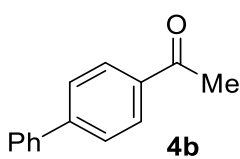

**4b**<sup>28</sup> was purified by flash column chromatography (ethyl acetate/hexane = 1:10 to 1:3) as a white solid (165 mg, 84%). M.P. 118–120  $^\circ\text{C}$ .  $^1\text{H}$ -NMR (400 MHz,  $\text{CDCl}_3$ )  $\delta$ : 8.06–8.02 (m, 2H), 7.71–7.67 (m, 2H), 7.65–7.61 (m, 2H), 7.50–7.45 (m, 2H), 7.43–7.38 (m, 1H), 2.64 (s, 3H).  $^{13}\text{C}$ -NMR (100 MHz,  $\text{CDCl}_3$ )  $\delta$ : 197.9, 145.9, 140.0, 136.0, 129.10, 129.06, 128.4, 127.42, 127.38, 26.8. IR 1672.5, 1592.6, 1479.6, 1398.6, 1356.5, 1202.2, 1122.2, 835.3, 759.3  $\text{cm}^{-1}$ ; HRMS (ESI<sup>+</sup>) ( $m/z$ ) calcd. for  $\text{C}_{14}\text{H}_{10}\text{O}$   $[\text{M}+\text{H}]^+$  197.0961; found 197.0957.

#### 4'-Methoxyacetophenone (**4c**)

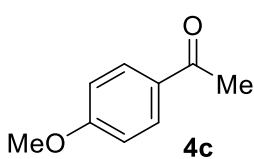

**4c**<sup>28</sup> was purified by flash column chromatography (ethyl acetate/hexane = 1:10 to 1:3) as a light-yellow oil (138 mg, 92%).  $^1\text{H}$ -NMR (400 MHz,  $\text{CDCl}_3$ )  $\delta$ : 7.96–7.91 (m, 2H), 6.95–6.91 (m, 2H), 3.87 (s, 3H), 2.55 (s, 3H).  $^{13}\text{C}$ -NMR (100 MHz,  $\text{CDCl}_3$ )  $\delta$ : 196.9, 163.6, 130.7, 130.5, 113.8, 55.6, 26.5. IR 1667.0, 1597.7, 1505.8,

1416.7, 1356.4, 1248.1, 1171.5, 1018.7, 829.4  $\text{cm}^{-1}$ ; HRMS (ESI<sup>+</sup>) (m/z) calcd. for  $\text{C}_9\text{H}_{11}\text{O}_2$  [M+H]<sup>+</sup> 151.0754; found 151.0755.

#### 4'-Benzyloxyacetophenone (4d)

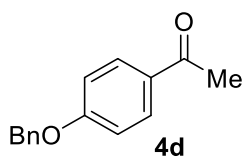

**4d**<sup>29</sup> was purified by flash column chromatography (ethyl acetate/hexane = 1:10 to 1:3) as a white solid (186 mg, 82%). M.P. 93–95 °C. <sup>1</sup>H-NMR (400 MHz,  $\text{CDCl}_3$ )  $\delta$ : 7.96–7.92 (m, 2H), 7.45–7.30 (m, 5H), 7.04–6.99 (m, 2H), 5.13 (s, 2H), 2.55 (s, 3H). <sup>13</sup>C-NMR (100 MHz,  $\text{CDCl}_3$ )  $\delta$ : 196.8, 162.7, 136.3, 130.7, 130.6, 128.8, 128.3, 127.6, 114.6, 70.2, 26.4. IR 3060.5, 2939.3, 2881.9, 1674.3, 1593.3, 1506.3, 1451.6, 1422.6, 1356.3, 1243.1, 1006.0, 826.9, 757.5  $\text{cm}^{-1}$ ; HRMS (ESI<sup>+</sup>) (m/z) calcd. for  $\text{C}_{15}\text{H}_{15}\text{O}_2$  [M+H]<sup>+</sup> 227.1067; found 227.1066.

#### 4'-Acetyloxyacetophenone (4e)

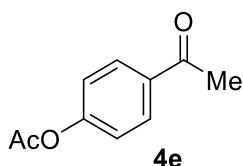

**4e**<sup>30</sup> was purified by flash column chromatography (ethyl acetate/hexane = 1:10 to 1:3) as a light-yellow oil (142.55 mg, 80%). <sup>1</sup>H-NMR (400 MHz,  $\text{CDCl}_3$ )  $\delta$ : 8.00–7.95 (m, 2H), 7.20–7.15 (m, 2H), 2.58 (s, 3H), 2.31 (s, 3H). <sup>13</sup>C-NMR (100 MHz,  $\text{CDCl}_3$ )  $\delta$ : 196.9, 168.9, 154.4, 134.8, 130.0, 121.9, 26.7, 21.2. IR 3071.8, 1749.0, 1670.8, 1591.3, 1503.6, 1418.0, 1265.5, 1161.4, 1007.5, 850.3  $\text{cm}^{-1}$ ; HRMS (ESI<sup>+</sup>) (m/z) calcd. for  $\text{C}_{10}\text{H}_{11}\text{O}_3$  [M+H]<sup>+</sup> 179.0703; found 179.0700.

#### 4'-Fluoroacetophenone (4f)

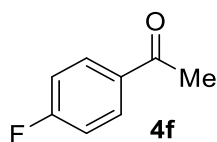

**4f**<sup>31</sup> was purified by flash column chromatography (ethyl acetate/hexane = 1:10 to 1:5) as a light-yellow oil (117 mg, 85%). <sup>1</sup>H-NMR (400 MHz,  $\text{CDCl}_3$ )  $\delta$ : 8.01–7.94 (m, 2H), 7.15–7.08 (m, 2H), 2.58 (s, 3H). <sup>13</sup>C-NMR (100 MHz,  $\text{CDCl}_3$ )  $\delta$ : 196.6, 164.6 (d,  $J = 253$  Hz), 133.7 (d,  $J = 2.9$  Hz), 131.0 (d,  $J = 9.2$  Hz), 115.7 (d,  $J = 21.6$  Hz), 26.6. IR 3073.3, 1682.2, 1594.3, 1504.5, 1408.4, 1357.5, 1227.6, 1155.1, 835.0  $\text{cm}^{-1}$ ; HRMS (ESI<sup>+</sup>) (m/z) calcd. for  $\text{C}_8\text{H}_8\text{FO}$  [M+H]<sup>+</sup> 139.0554; found 139.0549.

#### 4'-Chloroacetophenone (4g)

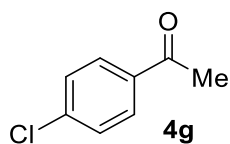

**4g**<sup>31</sup> was purified by flash column chromatography (ethyl acetate/hexane = 1:10 to 1:5) as a light-yellow oil (139 mg, 90%). <sup>1</sup>H-NMR (400 MHz,  $\text{CDCl}_3$ )  $\delta$ : 7.89–7.84 (m, 2H), 7.43–7.38 (m, 2H), 2.56 (s, 3H). <sup>13</sup>C-NMR (100 MHz,  $\text{CDCl}_3$ )  $\delta$ : 196.9, 139.6, 135.5, 129.8, 129.0, 26.6. IR 3066.7, 1682.3, 1585.2, 1485.8, 1395.4, 1356.5, 1255.6, 1092.3, 1011.7, 823.6, 758.7  $\text{cm}^{-1}$ ; HRMS (ESI<sup>+</sup>) (m/z) calcd. for  $\text{C}_8\text{H}_8\text{ClO}$  [M+H]<sup>+</sup> 155.0258; found 155.0254.

#### 4'-Bromoacetophenone (4h)

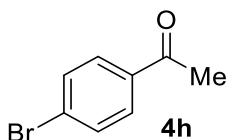

**4h**<sup>31</sup> was purified by flash column chromatography (ethyl acetate/hexane = 1:10 to 1:5) as a light-yellow oil (175 mg, 88%). <sup>1</sup>H-NMR (400 MHz, CDCl<sub>3</sub>) δ: 7.83–7.78 (m, 2H), 7.61–7.57 (m, 2H), 2.57 (s, 3H). <sup>13</sup>C-NMR (100 MHz, CDCl<sub>3</sub>) δ: 197.1, 135.9, 132.0, 130.0, 128.4, 26.6. IR 1666.1, 1576.2, 1390.4, 1258.7, 1171.7, 1068.0, 818.4 cm<sup>-1</sup>; HRMS (ESI<sup>+</sup>) (m/z) calcd. for C<sub>8</sub>H<sub>8</sub>BrO [M+H]<sup>+</sup> 198.9753; found 198.9747.

#### 4'-Iodoacetophenone (4i)

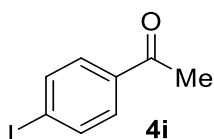

**4i**<sup>28</sup> was purified by flash column chromatography (ethyl acetate/hexane = 1:10 to 1:5) as a brown solid (224 mg, 91%). M.P. 80–82 °C. <sup>1</sup>H-NMR (400 MHz, CDCl<sub>3</sub>) δ: 7.84–7.80 (m, 2H), 7.67–7.63 (m, 2H), 2.56 (s, 3H). <sup>13</sup>C-NMR (100 MHz, CDCl<sub>3</sub>) δ: 197.4, 138.0, 136.5, 129.8, 101.2, 26.6. IR 1668.1, 1573.4, 1417.8, 1386.4, 1354.0, 1171.5, 813.5 cm<sup>-1</sup>; HRMS (ESI<sup>+</sup>) (m/z) calcd. for C<sub>8</sub>H<sub>8</sub>IO [M+H]<sup>+</sup> 246.9614; found 246.9611.

#### 4'-(4,4,5,5-Tetramethyl-1,3,2-dioxaborolan-2-yl)acetophenone (4j)

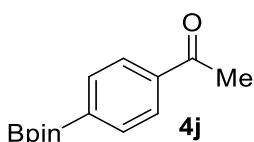

**4j**<sup>32</sup> was purified by flash column chromatography (ethyl acetate/hexane = 1:5 to 2:1) as a light-yellow oil (172 mg, 70%). <sup>1</sup>H-NMR (400 MHz, CDCl<sub>3</sub>) δ: 7.88 (q, *J* = 8.0 Hz, 4H), 2.61 (s, 3H), 1.35 (s, 12H). <sup>13</sup>C-NMR (100 MHz, CDCl<sub>3</sub>) δ: 198.6, 139.1, 135.0, 127.4, 84.3, 26.9, 25.0. IR 1678.1, 1506.6, 1393.8, 1353.7, 1261.5, 1140.3, 1090.4, 854.8 cm<sup>-1</sup>; HRMS (ESI<sup>+</sup>) (m/z) calcd. for C<sub>14</sub>H<sub>20</sub>BO<sub>3</sub> [M+H]<sup>+</sup> 247.1500; found 247.1498.

#### 4-Methoxycarbonylbenzaldehyde (4k)

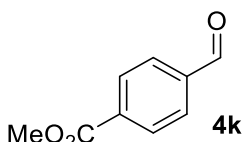

MeCN (10 mL) was used as the solvent instead of EtOH. **4k**<sup>31</sup> was purified by flash column chromatography (ethyl acetate/hexane = 1:10 to 1:3) as a light-yellow oil (148 mg, 90%). <sup>1</sup>H-NMR (400 MHz, CDCl<sub>3</sub>) δ: 10.10 (s, 1H), 8.21–8.17 (m, 2H), 7.97–7.93 (m, 2H), 3.96 (s, 3H). <sup>13</sup>C-NMR (100 MHz, CDCl<sub>3</sub>) δ: 191.8, 166.2, 139.3, 135.2, 130.3, 129.7, 52.7. IR 1720.7, 1682.2, 1572.2, 1500.4, 1432.6, 1387.8, 1193.9, 1102.3, 1007.8, 849.3 cm<sup>-1</sup>; HRMS (ESI<sup>+</sup>) (m/z) calcd. for C<sub>9</sub>H<sub>9</sub>O<sub>3</sub> [M+H]<sup>+</sup> 165.0546; found 165.0542.

#### 3,4-Dimethoxybenzaldehyde (4l)

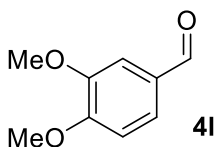

MeCN (10 mL) was used as the solvent instead of EtOH. **4l**<sup>33</sup> was purified by flash column chromatography (ethyl acetate/hexane = 1:10 to 1:3) as a light-yellow oil (143 mg, 86%). <sup>1</sup>H-NMR (400 MHz, CDCl<sub>3</sub>) δ: 9.81 (s, 1H), 7.41 (dd, *J* = 8.2, 1.9 Hz, 1H), 7.37 (d, *J* = 1.9 Hz, 1H), 6.93 (d, *J* = 8.2 Hz, 1H), 3.93 (s, 3H), 3.90 (s, 3H). <sup>13</sup>C-NMR (100 MHz, CDCl<sub>3</sub>) δ: 191.0, 154.5, 149.6, 130.1, 126.9, 110.4, 108.9, 56.2, 56.0. IR 3072.97, 2943.76, 2839.54, 2764.68, 1675.23, 1583.70, 1505.70, 1463.02, 1419.78, 1129.93, 1011.43, 869.50 cm<sup>-1</sup>; HRMS (ESI<sup>+</sup>) (m/z) calcd. for C<sub>9</sub>H<sub>11</sub>O<sub>3</sub> [M+H]<sup>+</sup> 167.0703; found 167.0700.

#### 2,3-Dihydrobenzofuran-5-carboxaldehyde (4m)

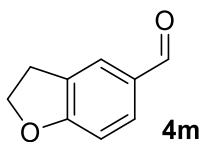

MeCN (10 mL) was used as the solvent instead of EtOH. **4m**<sup>34</sup> was purified by flash column chromatography (ethyl acetate/hexane = 1:10 to 1:3) as a light-yellow oil (120 mg, 81%). <sup>1</sup>H-NMR (400 MHz, CDCl<sub>3</sub>) δ: 9.80 (s, 1H), 7.73–7.70 (m, 1H), 7.66–7.62 (m, 1H), 6.84 (d, *J* = 8.2 Hz, 1H), 4.64 (t, *J* = 8.8 Hz, 2H), 3.22 (t, *J* = 9.2 Hz, 2H).

<sup>13</sup>C-NMR (100 MHz, CDCl<sub>3</sub>) δ: 190.7, 165.7, 133.1, 130.5, 128.5, 126.0, 109.7, 72.5, 28.8. IR 2906.3, 2833.3, 2742.8, 1677.6, 1596.9, 1486.1, 1441.2, 1327.5, 1239.7, 1091.9, 816.4 cm<sup>-1</sup>; HRMS (ESI<sup>+</sup>) (*m/z*) calcd. for C<sub>9</sub>H<sub>9</sub>O<sub>2</sub> [M+H]<sup>+</sup> 149.0597; found 149.0592.

#### *trans*-Cinnamaldehyde (**4n**)

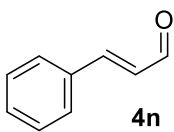

MeCN (10 mL) was used as the solvent instead of EtOH. **4n**<sup>33</sup> was purified by flash column chromatography (ethyl acetate/hexane = 1:10 to 1:5) as a light-yellow oil (104 mg, 79%). <sup>1</sup>H-NMR (400 MHz, CDCl<sub>3</sub>) δ: 9.69 (d, *J* = 7.7 Hz, 1H), 7.58–7.52 (m, 2H), 7.49–7.40 (m, 4H), 6.68 (dd, *J* = 16.0, 7.7 Hz, 1H). <sup>13</sup>C-NMR (100 MHz, CDCl<sub>3</sub>) δ: 193.7,

152.8, 134.1, 131.3, 129.2, 128.64, 128.55. IR 3057.9, 2813.5, 2741.8, 1668.6, 1621.7, 1448.8, 1296.4, 1247.8, 1118.7, 744.8 cm<sup>-1</sup>; HRMS (ESI<sup>+</sup>) (*m/z*) calcd. for C<sub>9</sub>H<sub>9</sub>O [M+H]<sup>+</sup> 133.0648; found 133.0647.

#### 2-Ethynylbenzaldehyde (**4o**)

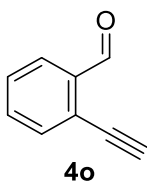

MeCN (10 mL) was used as the solvent instead of EtOH. **4o**<sup>35</sup> was purified by flash column chromatography (ethyl acetate/hexane = 1:10 to 1:5) as a light-yellow oil (107 mg, 82%). <sup>1</sup>H-NMR (400 MHz, CDCl<sub>3</sub>) δ: 10.53 (s, 1H), 7.91 (dd, *J* = 7.7, 1.4 Hz, 1H), 7.60 (dd, *J* = 7.8, 1.5 Hz, 1H), 7.54 (td, *J* = 7.3, 1.5 Hz, 1H), 7.50–7.44 (m, 1H), 3.46 (s, 1H). <sup>13</sup>C-NMR (100 MHz, CDCl<sub>3</sub>) δ: 191.5, 136.7, 134.0, 133.8, 129.3, 127.4, 125.6, 84.4, 79.3. IR 3345.2,

2847.6, 2753.7, 2091.9, 1681.6, 1584.3, 1445.5, 1388.2, 1342.0, 1264.4, 1195.3, 726.5 cm<sup>-1</sup>; HRMS (ESI<sup>+</sup>) (*m/z*) calcd. for C<sub>9</sub>H<sub>7</sub>O [M+H]<sup>+</sup> 131.0491; found 131.0490.

#### Benzophenone (**4p**)

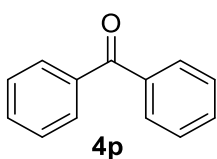

**4p**<sup>31</sup> was purified by flash column chromatography (ethyl acetate/hexane = 1:10 to 1:3) as a light-yellow oil (175 mg, 96%). <sup>1</sup>H-NMR (400 MHz, CDCl<sub>3</sub>) δ: 7.83–7.78 (m, 4H), 7.62–7.56 (m, 2H), 7.51–7.45 (m, 4H). <sup>13</sup>C-NMR (100 MHz, CDCl<sub>3</sub>) δ: 196.8, 137.7, 132.5, 130.2, 128.4. IR 3056.8, 1653.2, 1594.7, 1444.4, 1361.8, 1273.0, 756.5

cm<sup>-1</sup>; HRMS (ESI<sup>+</sup>) (*m/z*) calcd. for C<sub>13</sub>H<sub>11</sub>O [M+H]<sup>+</sup> 183.0804; found 183.0797.

#### 3,4-Dihydronaphthalen-1(2H)-one (**4q**)

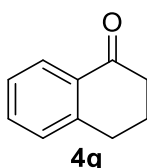

**4q**<sup>36</sup> was purified by flash column chromatography (ethyl acetate/hexane = 1:10 to 1:3) as a light-yellow oil (118 mg, 81%). <sup>1</sup>H-NMR (400 MHz, CDCl<sub>3</sub>) δ: 8.02 (dd, *J* = 7.8, 1.5 Hz, 1H), 7.44 (td, *J* = 7.4, 1.5 Hz, 1H), 7.33–7.22 (m, 2H), 2.95 (t, *J* = 6.1 Hz, 2H), 2.64 (t, *J* = 6.3 Hz, 2H), 2.11 (p, *J* = 6.6 Hz, 2H). <sup>13</sup>C-NMR (100 MHz, CDCl<sub>3</sub>) δ: 198.5, 144.6, 133.5, 132.7, 128.9, 127.3, 126.7, 39.3, 29.8, 23.4. IR 3025.1, 2941.2, 2871.7, 1678.7, 1599.1,

1452.1, 1323.3, 1186.2, 1024.3, 762.9  $\text{cm}^{-1}$ ; HRMS (ESI<sup>+</sup>) (m/z) calcd. for  $\text{C}_{10}\text{H}_{11}\text{O}$   $[\text{M}+\text{H}]^+$  147.0804; found 147.0797.

### 2-Naphthaldehyde (4r)

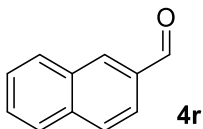

MeCN (10 mL) was used as the solvent instead of EtOH. **4r**<sup>31</sup> was purified by flash column chromatography (ethyl acetate/hexane = 1:10 to 1:5) as a light-yellow oil (131 mg, 84%). <sup>1</sup>H-NMR (400 MHz,  $\text{CDCl}_3$ )  $\delta$ : 10.13 (s, 1H), 8.28 (s, 1H), 7.99–7.84 (m, 4H), 7.65–7.53 (m, 2H). <sup>13</sup>C-NMR (100 MHz,  $\text{CDCl}_3$ )  $\delta$ : 192.2, 136.5, 134.6, 134.1, 132.7, 129.6, 129.14, 129.10, 128.1, 127.1, 122.8. IR 2825.3, 1683.0, 1458.0, 1339.6, 1158.4, 870.0, 745.2  $\text{cm}^{-1}$ ; HRMS (ESI<sup>+</sup>) (m/z) calcd. for  $\text{C}_{11}\text{H}_9\text{O}$   $[\text{M}+\text{H}]^+$  157.0648; found 157.0646.

### 2-Acetonaphthone (4s)

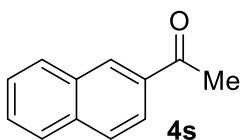

**4s**<sup>28</sup> was purified by flash column chromatography (ethyl acetate/hexane = 1:10 to 1:3) as a light-yellow oil (141 mg, 83%). <sup>1</sup>H-NMR (400 MHz,  $\text{CDCl}_3$ )  $\delta$ : 8.46 (s, 1H), 8.02 (dd,  $J = 8.6, 1.8$  Hz, 1H), 7.95 (d,  $J = 8.2$  Hz, 1H), 7.91–7.85 (m, 2H), 7.63–7.52 (m, 2H), 2.72 (s, 3H). <sup>13</sup>C-NMR (100 MHz,  $\text{CDCl}_3$ )  $\delta$ : 198.2, 135.7, 134.6, 132.6, 130.3, 129.7, 128.6, 128.5, 127.9, 126.9, 124.0, 26.8. IR 3057.5, 1668.7, 1460.1, 1425.8, 1360.4, 1274.9, 1186.0, 1123.0, 867.0, 751.0  $\text{cm}^{-1}$ ; HRMS (ESI<sup>+</sup>) (m/z) calcd. for  $\text{C}_{12}\text{H}_{11}\text{O}$   $[\text{M}+\text{H}]^+$  171.0804; found 171.0800.

### Fluorenone (4t)

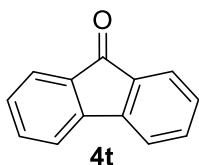

**4t**<sup>37</sup> was purified by flash column chromatography (ethyl acetate/hexane = 1:10 to 1:3) as a yellow solid (175 mg, 97%). M.P. 81–83 °C. <sup>1</sup>H-NMR (400 MHz,  $\text{CDCl}_3$ )  $\delta$ : 7.64 (d,  $J = 7.4$  Hz, 2H), 7.53–7.44 (m, 4H), 7.32–7.24 (m, 2H). <sup>13</sup>C-NMR (100 MHz,  $\text{CDCl}_3$ )  $\delta$ : 194.0, 144.6, 134.8, 134.3, 129.2, 124.4, 120.4. IR 3054.2, 1706.1, 1596.8, 1443.0, 1291.6, 1185.2, 1088.9, 726.8  $\text{cm}^{-1}$ ; HRMS (ESI<sup>+</sup>) (m/z) calcd. for  $\text{C}_{13}\text{H}_9\text{O}$   $[\text{M}+\text{H}]^+$  181.0648; found 181.0641.

### 2-Acetylthiophene (4u)

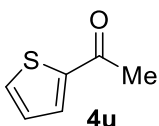

**4u**<sup>38</sup> was purified by flash column chromatography (dichloromethane/hexane = 1:1 to 3:1) as a light-yellow oil (105 mg, 83%). <sup>1</sup>H-NMR (400 MHz,  $\text{CDCl}_3$ )  $\delta$ : 7.69 (dd,  $J = 3.8, 1.2$  Hz, 1H), 7.63 (dd,  $J = 4.9, 1.1$  Hz, 1H), 7.12 (dd,  $J = 5.0, 3.8$  Hz, 1H), 2.57 (s, 3H). <sup>13</sup>C-NMR (100 MHz,  $\text{CDCl}_3$ )  $\delta$ : 190.9, 144.7, 133.9, 132.6, 128.2, 27.1. IR 3094.1, 1655.9, 1516.1, 1410.9, 1355.6, 1267.9, 1028.9, 852.8  $\text{cm}^{-1}$ ; HRMS (ESI<sup>+</sup>) (m/z) calcd. for  $\text{C}_6\text{H}_7\text{OS}$   $[\text{M}+\text{H}]^+$  127.0212; found 127.0211.

### 2-Benzoylthiophene (4v)

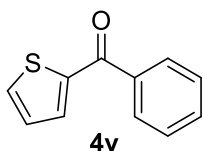

**4v**<sup>39</sup> was purified by flash column chromatography (ethyl acetate/hexane = 1:10 to 1:3) as a light-yellow oil (166 mg, 88%). <sup>1</sup>H-NMR (400 MHz, CDCl<sub>3</sub>) δ: 7.88–7.84 (m, 2H), 7.70 (dd, *J* = 4.9, 1.2 Hz, 1H), 7.63 (dd, *J* = 3.8, 1.2 Hz, 1H), 7.61–7.55 (m, 1H), 7.52–7.46 (m, 2H), 7.14 (dd, *J* = 5.0, 3.8 Hz, 1H). <sup>13</sup>C-NMR (100 MHz, CDCl<sub>3</sub>) δ: 188.3, 143.7, 138.2, 134.9, 134.3, 132.4, 129.2, 128.5, 128.1. IR 3099.1, 1623.7, 1588.8, 1511.9, 1447.3, 1409.2, 1049.4, 708.0 cm<sup>-1</sup>; HRMS (ESI<sup>+</sup>) (*m/z*) calcd. for C<sub>11</sub>H<sub>9</sub>OS [M+H]<sup>+</sup> 189.0369; found 189.0368.

#### Benzofuran-2-carboxaldehyde (**4w**)

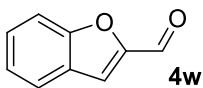

MeCN (10 mL) was used as the solvent instead of EtOH. **4w**<sup>40</sup> was purified by flash column chromatography (ethyl acetate/hexane = 1:10 to 1:3) as a light-yellow oil (120 mg, 82%). <sup>1</sup>H-NMR (400 MHz, CDCl<sub>3</sub>) δ: 9.84 (s, 1H), 7.71 (dt, *J* = 7.9, 1.0 Hz, 1H), 7.60–7.53 (m, 2H), 7.52–7.46 (m, 1H), 7.34–7.29 (m, 1H). <sup>13</sup>C-NMR (100 MHz, CDCl<sub>3</sub>) δ: 179.8, 156.3, 152.8, 129.3, 126.7, 124.3, 123.7, 117.9, 112.7. IR 3089.8, 2835.9, 2726.2, 1675.7, 1609.3, 1552.3, 1476.2, 1445.9, 1323.6, 1286.7, 1117.9, 735.3 cm<sup>-1</sup>; HRMS (ESI<sup>+</sup>) (*m/z*) calcd. for C<sub>9</sub>H<sub>7</sub>O<sub>2</sub> [M+H]<sup>+</sup> 147.0441; found 147.0445.

#### Indole-3-carboxaldehyde (**4x**)

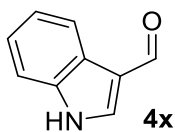

MeCN (10 mL) was used as the solvent instead of EtOH. **4x**<sup>40</sup> was purified by flash column chromatography (ethyl acetate/hexane = 1:5 to 1:1) as a brown solid (123 mg, 85%). M.P. 196–198 °C. <sup>1</sup>H-NMR (400 MHz, DMSO) δ: 12.13 (s, 1H), 9.93 (s, 1H), 8.30–8.25 (m, 1H), 8.08 (d, *J* = 8.0 Hz, 1H), 7.50 (d, *J* = 6.9 Hz, 1H), 7.29–7.18 (m, 2H). <sup>13</sup>C-NMR (100 MHz, DMSO) δ: 184.9, 138.4, 137.0, 124.1, 123.4, 122.1, 120.8, 118.1, 112.4. IR 3103.9, 3041.4, 2815.6, 2737.4, 1627.1, 1571.4, 1518.6, 1436.7, 1385.6, 1237.8, 1122.7, 1078.5, 756.0 cm<sup>-1</sup>; HRMS (ESI<sup>+</sup>) (*m/z*) calcd. for C<sub>9</sub>H<sub>8</sub>NO [M+H]<sup>+</sup> 146.0600; found 146.0600.

#### 1-Phenylpentan-1-one (**4y**)

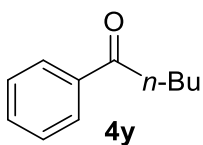

**4y**<sup>39</sup> was purified by flash column chromatography (ethyl acetate/hexane = 1:10 to 1:3) as a light-yellow oil (140 mg, 86%). <sup>1</sup>H-NMR (400 MHz, CDCl<sub>3</sub>) δ: 7.98–7.94 (m, 2H), 7.57–7.52 (m, 1H), 7.48–7.42 (m, 2H), 2.94 (t, *J* = 7.4 Hz, 2H), 1.69 (p, *J* = 7.3 Hz, 2H), 1.37 (h, *J* = 7.4 Hz, 2H), 0.93 (t, *J* = 7.4 Hz, 3H). <sup>13</sup>C-NMR (100 MHz, CDCl<sub>3</sub>) δ: 200.7, 137.2, 133.0, 128.7, 128.2, 38.4, 26.6, 22.6, 14.1. IR 3061.9, 2932.3, 2868.8, 1682.4, 1593.2, 1450.3, 1353.1, 1263.4, 1207.6, 1010.6, 747.4 cm<sup>-1</sup>; HRMS (ESI<sup>+</sup>) (*m/z*) calcd. for C<sub>11</sub>H<sub>15</sub>O [M+H]<sup>+</sup> 163.1117; found 163.1114.

#### Undecan-6-one (**4z**)

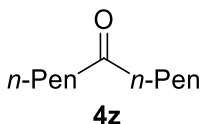

**4z**<sup>41</sup> was purified by flash column chromatography (ethyl acetate/hexane = 1:10 to 1:5) as a light-yellow oil (160 mg, 94%). <sup>1</sup>H-NMR (400 MHz, CDCl<sub>3</sub>) δ: 2.35 (t, *J* = 7.4 Hz, 4H), 1.52 (p, *J* = 7.5 Hz, 4H), 1.36–1.19 (m, 8H), 0.86 (t, *J* = 6.9 Hz, 6H). <sup>13</sup>C-NMR



(100 MHz, CDCl<sub>3</sub>)  $\delta$ : 211.8, 42.9, 31.6, 23.7, 22.6, 14.0. IR 2928.7, 2863.7, 1712.4, 1460.6, 1411.1, 1371.7, 1131.7, 729.1 cm<sup>-1</sup>; HRMS (ESI<sup>+</sup>) (m/z) calcd. for C<sub>11</sub>H<sub>23</sub>O [M+H]<sup>+</sup> 171.1743; found 171.1737.

#### 4-Phenylcyclohexanone (4aa)

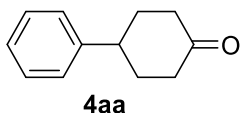

**4aa**<sup>42</sup> was purified by flash column chromatography (ethyl acetate/hexane = 1:10 to 1:3) as a light-yellow oil (129 mg, 74%). <sup>1</sup>H-NMR (400 MHz, CDCl<sub>3</sub>)  $\delta$ : 7.35–7.29 (m, 2H), 7.27–7.19 (m, 3H), 2.98 (tt, *J* = 12.1, 3.5 Hz, 1H), 2.57–2.46 (m, 4H), 2.26–2.17 (m, 2H), 2.01–1.87 (m, 2H). <sup>13</sup>C-NMR (100 MHz, CDCl<sub>3</sub>)  $\delta$ : 211.2, 144.9, 128.7, 126.8, 126.7, 42.8, 41.5, 34.1. IR 3026.3, 2937.1, 2866.9, 1698.4, 1599.6, 1489.8, 1450.2, 1416.9, 1163.6, 755.8 cm<sup>-1</sup>; HRMS (ESI<sup>+</sup>) (m/z) calcd. for C<sub>12</sub>H<sub>15</sub>O [M+H]<sup>+</sup> 175.1117; found 175.1114.

#### 4-*tert*-Butylcyclohexanone (4ab)

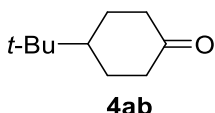

**4ab**<sup>36</sup> was purified by flash column chromatography (ethyl acetate/hexane = 1:10 to 1:5) as a light-yellow oil (119 mg, 77%). <sup>1</sup>H-NMR (400 MHz, CDCl<sub>3</sub>)  $\delta$ : 2.41–2.23 (m, 4H), 2.10–2.02 (m, 2H), 1.51–1.36 (m, 3H), 0.89 (s, 9H). <sup>13</sup>C-NMR (100 MHz, CDCl<sub>3</sub>)  $\delta$ : 212.6, 46.8, 41.4, 32.6, 27.7. IR 2945.7, 2868.3, 1719.2, 1460.4, 1420.3, 1362.1, 1218.3, 1160.8 cm<sup>-1</sup>; HRMS (ESI<sup>+</sup>) (m/z) calcd. for C<sub>10</sub>H<sub>19</sub>O [M+H]<sup>+</sup> 155.1430; found 155.1432.

#### (5S)-17-Acetyl-4,5-dihydrotestosterone (4ac)

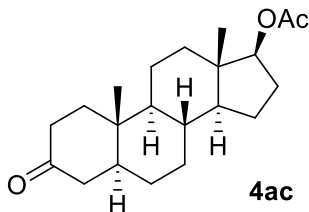

MeCN/AcOH (50/1, 10 mL) was used as the solvent instead of EtOH, and additional CeBr<sub>3</sub> (19 mg, 0.05 mmol) and H<sub>2</sub>O<sub>2</sub> (204  $\mu$ L, 2 mmol) were needed. **4ac**<sup>43</sup> was purified by flash column chromatography (ethyl acetate/hexane = 1:10 to 1:3) as a white solid (206 mg, 62%). M.P. 159–161 °C. <sup>1</sup>H-NMR (400 MHz, CDCl<sub>3</sub>)  $\delta$ : 4.62–4.56 (m, 1H), 2.42–2.09 (m, 5H), 2.03 (s, 3H), 1.77–1.24 (m, 14H), 1.20–1.12 (m, 1H), 1.01 (s, 3H), 0.96–0.85 (m, 1H), 0.80 (s, 3H), 0.78–0.71 (m, 1H). <sup>13</sup>C-NMR (100 MHz, CDCl<sub>3</sub>)  $\delta$ : 212.0, 171.3, 82.9, 53.9, 50.7, 46.7, 44.8, 42.8, 38.6, 38.2, 37.0, 35.9, 35.3, 31.4, 28.9, 27.7, 23.7, 21.3, 21.0, 12.3, 11.6. IR 2929.7, 2848.3, 1730.7, 1710.5, 1436.6, 1371.2, 1241.9, 1029.8 cm<sup>-1</sup>; HRMS (ESI<sup>+</sup>) (m/z) calcd. for C<sub>21</sub>H<sub>33</sub>O<sub>3</sub> [M+H]<sup>+</sup> 333.2424; found 333.2416.  $[\alpha]_D^{25} = +29$  (*c* 1, CHCl<sub>3</sub>).

#### 1-Indanone (4ad)

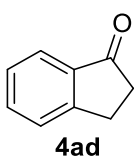

**4ad**<sup>38</sup> was purified by flash column chromatography (ethyl acetate/hexane = 1:10 to 1:5) as a light-yellow oil (83.3 mg, 63%). <sup>1</sup>H-NMR (400 MHz, CDCl<sub>3</sub>)  $\delta$ : 7.74 (d, *J* = 7.7 Hz, 1H), 7.60–7.55 (m, 1H), 7.46 (d, *J* = 7.7 Hz, 1H), 7.34 (t, *J* = 7.4 Hz, 1H), 3.12 (t, *J* = 5.8 Hz, 2H), 2.71–2.66 (m, 2H). <sup>13</sup>C-NMR (100 MHz, CDCl<sub>3</sub>)  $\delta$ : 207.2, 155.3, 137.2, 134.7, 127.4, 126.8, 123.8, 36.3, 25.9. IR 3049.6, 2943.9, 2893.5, 1704.0, 1601.8, 1471.1, 1439.6, 1274.8, 1195.5, 1033.3, 756.1 cm<sup>-1</sup>; HRMS (ESI<sup>+</sup>) (m/z) calcd. for C<sub>9</sub>H<sub>9</sub>O [M+H]<sup>+</sup> 133.0648; found 133.0644.

#### 4-*tert*-Butylbenzaldehyde (4ae)

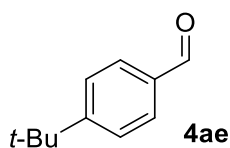

MeCN (10 mL) was used as the solvent instead of EtOH. **4ae**<sup>31</sup> was purified by flash column chromatography (ethyl acetate/hexane = 1:10 to 1:5) as a light-yellow oil (146 mg, 90%). <sup>1</sup>H-NMR (400 MHz, CDCl<sub>3</sub>) δ: 9.98 (s, 1H), 7.81 (d, *J* = 8.3 Hz, 2H), 7.54 (d, *J* = 8.2 Hz, 2H), 1.36 (s, 9H). <sup>13</sup>C-NMR (100 MHz, CDCl<sub>3</sub>) δ: 192.2, 158.6, 134.2, 129.8, 126.1, 35.5, 31.2. IR 2906.5, 2870.8, 2823.3, 2726.9, 1697.1, 1604.4, 1467.6, 1414.1, 1368.9, 1217.2, 1105.6, 825.9 cm<sup>-1</sup>; HRMS (ESI<sup>+</sup>) (*m/z*) calcd. for C<sub>11</sub>H<sub>15</sub>O [M+H]<sup>+</sup> 163.1117; found 163.1112.

#### 4-Methoxybenzaldehyde (4af)

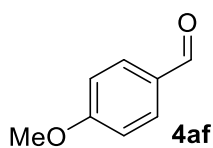

MeCN (10 mL) was used as the solvent instead of EtOH. **4af**<sup>31</sup> was purified by flash column chromatography (ethyl acetate/hexane = 1:10 to 1:5) as a light-yellow oil (128 mg, 94%). <sup>1</sup>H-NMR (400 MHz, CDCl<sub>3</sub>) δ: 9.88 (s, 1H), 7.82 (d, *J* = 8.4 Hz, 2H), 6.99 (d, *J* = 8.4 Hz, 2H), 3.88 (s, 3H). <sup>13</sup>C-NMR (100 MHz, CDCl<sub>3</sub>) δ: 190.9, 164.7, 132.1, 130.1, 114.4, 55.7. IR 3009.5, 2837.6, 2738.7, 1681.7, 1596.0, 1508.3, 1460.3, 1253.1, 1213.5, 1154.8, 1021.2, 827.1 cm<sup>-1</sup>; HRMS (ESI<sup>+</sup>) (*m/z*) calcd. for C<sub>8</sub>H<sub>8</sub>O<sub>2</sub> [M+H]<sup>+</sup> 137.0597; found 137.0597.

#### 4-Phenylbenzaldehyde (4ag)

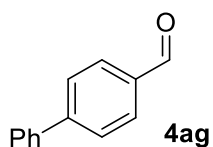

MeCN (10 mL) was used as the solvent instead of EtOH. **4ag**<sup>31</sup> was purified by flash column chromatography (ethyl acetate/hexane = 1:10 to 1:5) as a light-yellow oil (162 mg, 89%). <sup>1</sup>H-NMR (400 MHz, CDCl<sub>3</sub>) δ: 10.06 (s, 1H), 7.98–7.93 (m, 2H), 7.78–7.74 (m, 2H), 7.66–7.62 (m, 2H), 7.52–7.46 (m, 2H), 7.45–7.40 (m, 1H). <sup>13</sup>C-NMR (100 MHz, CDCl<sub>3</sub>) δ: 192.0, 147.3, 139.8, 135.3, 130.4, 129.1, 128.6, 127.8, 127.5. IR 3025.1, 2833.8, 2742.7, 1687.7, 1598.2, 1560.8, 1382.7, 1213.0, 1166.7, 830.3, 758.2 cm<sup>-1</sup>; HRMS (ESI<sup>+</sup>) (*m/z*) calcd. for C<sub>13</sub>H<sub>11</sub>O [M+H]<sup>+</sup> 183.0804; found 183.0810.

#### 1-Pyrenecarboxaldehyde (4ah)

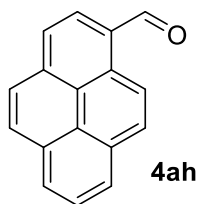

MeCN (10 mL) was used as the solvent instead of EtOH. **4ah**<sup>44</sup> was purified by flash column chromatography (ethyl acetate/hexane = 1:10 to 1:5) as a yellow solid (200 mg, 87%). M.P. 124–126 °C. <sup>1</sup>H-NMR (400 MHz, CDCl<sub>3</sub>) δ: 10.77 (s, 1H), 9.39 (d, *J* = 5.3 Hz, 1H), 8.41 (d, *J* = 4.5 Hz, 1H), 8.31–8.27 (m, 3H), 8.20 (dd, *J* = 7.7, 4.5 Hz, 2H), 8.10–8.06 (m, 2H). <sup>13</sup>C-NMR (100 MHz, CDCl<sub>3</sub>) δ: 193.2, 135.7, 131.5, 131.2, 131.1, 131.0, 130.8, 130.5, 127.5, 127.3, 127.2, 127.0, 126.7, 124.8, 124.7, 124.2, 123.1. IR 2705.2, 1675.1, 1577.8, 1498.3, 1370.5, 1174.1, 1051.6, 778.8 cm<sup>-1</sup>; HRMS (ESI<sup>+</sup>) (*m/z*) calcd. for C<sub>17</sub>H<sub>11</sub>O [M+H]<sup>+</sup> 231.0804; found 231.0797.

#### Cyclododecanone (4ai)

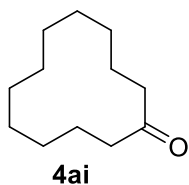

**4ai**<sup>37</sup> was purified by flash column chromatography (ethyl acetate/hexane = 1:40 to 1:5) as a light-yellow oil (168 mg, 92%). <sup>1</sup>H-NMR (400 MHz, CDCl<sub>3</sub>) δ: 2.47–2.42 (m, 4H), 1.74–1.65 (m, 4H), 1.35–1.20 (m, 14H). <sup>13</sup>C-NMR (100 MHz, CDCl<sub>3</sub>) δ: 212.7, 40.4, 24.8, 24.6, 24.2, 22.6, 22.4. IR 2926.0, 2856.4, 1702.1, 1468.0, 1435.4, 1362.4, 1129.8, 1019.2, 722.3 cm<sup>-1</sup>; HRMS (ESI<sup>+</sup>) (m/z) calcd. for C<sub>12</sub>H<sub>23</sub>O [M+H]<sup>+</sup> 183.1743; found

183.1741.

#### Ethyl levulinate (4aj)

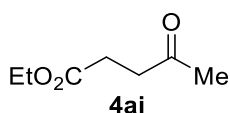

**4aj**<sup>45</sup> was purified by flash column chromatography (ethyl acetate/hexane = 1:10 to 1:3) as a light-yellow oil (123 mg, 85%). <sup>1</sup>H-NMR (400 MHz, CDCl<sub>3</sub>) δ: 4.06 (q, *J* = 7.1 Hz, 2H), 2.69 (t, *J* = 6.5 Hz, 2H), 2.51 (t, *J* = 6.7 Hz, 2H), 2.15 (s, 3H), 1.19 (t, *J* = 7.2 Hz, 3H).

<sup>13</sup>C-NMR (100 MHz, CDCl<sub>3</sub>) δ: 206.8, 172.8, 60.7, 38.0, 29.9, 28.1, 14.2. IR 2934.7, 1717.1, 1363.6, 1204.9, 1185.2, 1155.2, 1029.3 cm<sup>-1</sup>; HRMS (ESI<sup>+</sup>) (m/z) calcd. for C<sub>7</sub>H<sub>13</sub>O<sub>3</sub> [M+H]<sup>+</sup> 145.0859; found 145.0854.

#### 2,4-Dichlorobenzaldehyde (4ak)

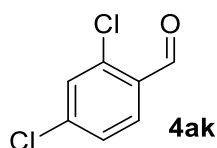

MeCN (10 mL) was used as the solvent instead of EtOH. **4ak**<sup>46</sup> was purified by flash column chromatography (ethyl acetate/hexane = 1:10 to 1:5) as a light-yellow oil (154 mg, 88%). <sup>1</sup>H-NMR (400 MHz, CDCl<sub>3</sub>) δ: 10.38 (s, 1H), 7.83 (d, *J* = 8.4 Hz, 1H), 7.44 (s, 1H), 7.33 (d, *J* = 8.4 Hz, 1H). <sup>13</sup>C-NMR (100 MHz, CDCl<sub>3</sub>) δ: 188.5, 141.2, 138.6,

131.0, 130.5, 130.4, 128.0. IR 3081.5, 2884.8, 2639.7, 1683.1, 1576.9, 1461.3, 1412.3, 1248.9, 1043.4, 820.6 cm<sup>-1</sup>; HRMS (ESI<sup>+</sup>) (m/z) calcd. for C<sub>7</sub>H<sub>5</sub>Cl<sub>2</sub>O [M+H]<sup>+</sup> 174.9712; found 174.9719.

#### 4'-Trifluoromethylacetophenone (4al)

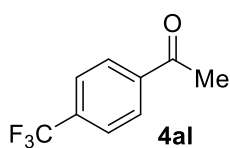

MeCN (10 mL) was used as the solvent instead of EtOH. **4al**<sup>38</sup> was purified by flash column chromatography (ethyl acetate/hexane = 1:10 to 1:5) as a light-yellow oil (175 mg, 93%). <sup>1</sup>H-NMR (400 MHz, CDCl<sub>3</sub>) δ: 8.02 (d, *J* = 5.0 Hz, 2H), 7.69 (d, *J* = 4.8 Hz, 2H), 2.62 (s, 3H). <sup>13</sup>C-NMR (100 MHz, CDCl<sub>3</sub>) δ: 197.0, 139.8, 134.2 (q, *J* = 18.5 Hz), 128.7, 125.7 (q, *J* = 2.2 Hz), 121.4 (q, *J* = 155 Hz), 26.8. IR 3010.9, 1690.9, 1409.6, 1320.2, 1258.6,

1165.8, 1116.9, 1058.8, 1013.0, 837.1 cm<sup>-1</sup>; HRMS (ESI<sup>+</sup>) (m/z) calcd. for C<sub>9</sub>H<sub>8</sub>F<sub>3</sub>O [M+H]<sup>+</sup> 189.0522; found 189.0516.

#### 3-Chlorobenzaldehyde (4am)

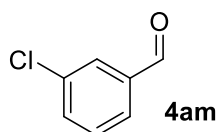

MeCN (10 mL) was used as the solvent instead of EtOH. **4am**<sup>31</sup> was purified by flash column chromatography (ethyl acetate/hexane = 1:10 to 1:5) as a light-yellow oil (128 mg, 91%). <sup>1</sup>H-NMR (400 MHz, CDCl<sub>3</sub>) δ: 9.97 (s, 1H), 7.84 (t, *J* = 1.1 Hz, 1H), 7.75 (dt, *J* = 4.3, 0.7 Hz, 1H), 7.58 (ddd, *J* = 4.6, 1.3, 0.6 Hz, 1H), 7.47 (t, *J* = 4.4 Hz, 1H).

<sup>13</sup>C-NMR (100 MHz, CDCl<sub>3</sub>) δ: 191.0, 137.9, 135.6, 134.5, 130.5, 129.4, 128.1. IR 3070.5, 2830.1, 2729.5,

1695.6, 1572.4, 1470.1, 1432.1, 1191.0, 1070.9, 785.5  $\text{cm}^{-1}$ ; HRMS (ESI<sup>+</sup>) (m/z) calcd. for  $\text{C}_7\text{H}_6\text{ClO}$  [M+H]<sup>+</sup> 141.0102; found 141.0099.

### 1-(6-methoxynaphthalen-2-yl)-propan-1-one (4an)

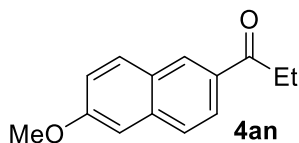

**4an**<sup>47</sup> was purified by flash column chromatography (ethyl acetate/hexane = 1:10 to 1:5) as a brown solid (201 mg, 94%). M.P. 110–112 °C. <sup>1</sup>H-NMR (400 MHz,  $\text{CDCl}_3$ )  $\delta$ : 8.38 (s, 1H), 7.99 (dd,  $J$  = 4.9, 1.0 Hz, 1H), 7.81 (d,  $J$  = 5.1 Hz, 1H), 7.73 (d,  $J$  = 4.9 Hz, 1H), 7.17 (dd,  $J$  = 5.1, 1.5 Hz, 1H), 7.12 (d,  $J$  = 1.5 Hz, 1H), 3.92 (s, 3H), 3.07 (q,  $J$  = 4.1 Hz, 2H), 1.26 (t,  $J$  = 4.1 Hz, 3H). <sup>13</sup>C-NMR (100 MHz,  $\text{CDCl}_3$ )  $\delta$ : 200.6, 159.7, 137.2, 132.4, 131.2, 129.5, 127.9, 127.1, 124.7, 119.7, 105.8, 55.5, 31.7, 8.6. IR 3059.5, 1674.9, 1618.2, 1474.8, 1383.1, 1344.9, 1185.4, 1017.3, 860.8  $\text{cm}^{-1}$ ; HRMS (ESI<sup>+</sup>) (m/z) calcd. for  $\text{C}_{14}\text{H}_{15}\text{O}_2$  [M+H]<sup>+</sup> 215.1067; found 215.1060.

### Anthracene-9-carbaldehyde (4ao)

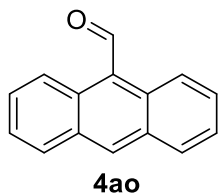

MeCN (10 mL) was used as the solvent instead of EtOH. **4ao**<sup>33</sup> was purified by flash column chromatography (ethyl acetate/hexane = 1:20 to 1:5) as a light-yellow solid (134 mg, 65%). M.P. 103–105 °C; <sup>1</sup>H-NMR (400 MHz,  $\text{CDCl}_3$ )  $\delta$ : 11.53 (s, 1H), 8.98 (dd,  $J$  = 9.0, 1.0 Hz, 2H), 8.70 (s, 1H), 8.06 (d,  $J$  = 8.4 Hz, 2H), 7.71–7.66 (m, 2H), 7.58–7.53 (m, 2H). <sup>13</sup>C-NMR (100 MHz,  $\text{CDCl}_3$ )  $\delta$ : 193.2, 135.4, 132.3, 131.2, 129.4, 129.3, 125.8, 124.9, 123.7. IR 1659.8, 1547.3, 1515.4, 1437.8, 1242.5, 1155.0, 1041.6, 843.8, 723.7  $\text{cm}^{-1}$ ; HRMS (ESI<sup>+</sup>) (m/z) calcd. for  $\text{C}_{15}\text{H}_{11}\text{O}$  [M+H]<sup>+</sup> 207.0804; found 207.0808.

### Octanal (4ap)

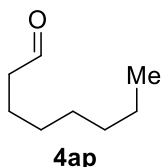

MeCN (10 mL) was used as the solvent instead of EtOH. **4ap**<sup>48</sup> was purified by flash column chromatography (ethyl acetate/hexane = 1:20 to 1:5) as a light-yellow oil (64.1 mg, 50%). <sup>1</sup>H-NMR (400 MHz,  $\text{CDCl}_3$ )  $\delta$ : 9.76 (t,  $J$  = 1.9 Hz, 1H), 2.39 (td,  $J$  = 7.4, 1.9 Hz, 2H), 1.67–1.59 (m, 2H), 1.34–1.24 (m, 8H), 0.86 (t,  $J$  = 7.0 Hz, 3H). <sup>13</sup>C-NMR (100 MHz,  $\text{CDCl}_3$ )  $\delta$ : 203.2, 44.1, 31.8, 29.3, 29.2, 22.7, 22.2, 14.2. IR 2925.5, 2857.5, 2715.6, 1725.1, 1461.0, 1383.9, 1140.4, 724.2  $\text{cm}^{-1}$ ; HRMS (ESI<sup>+</sup>) (m/z) calcd. for  $\text{C}_8\text{H}_{17}\text{O}$  [M+H]<sup>+</sup> 129.1274; found 129.1275.

### 3'-Bromo-4'-fluoroacetophenone (4aq)

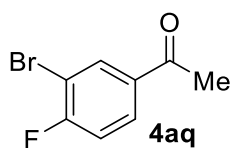

MeCN (10 mL) was used as the solvent instead of EtOH. **4aq** was purified by flash column chromatography (ethyl acetate/hexane = 1:10 to 1:5) as a light-yellow oil (176 mg, 81%). <sup>1</sup>H-NMR (400 MHz,  $\text{CDCl}_3$ )  $\delta$ : 8.15 (dd,  $J$  = 6.6, 2.2 Hz, 1H), 7.88 (ddd,  $J$  = 8.6, 4.6, 2.2 Hz, 1H), 7.17 (t,  $J$  = 8.3 Hz, 1H), 2.58 (s, 3H). <sup>13</sup>C-NMR (100 MHz,  $\text{CDCl}_3$ )  $\delta$ : 195.4, 160.9 (d,  $J$  = 254 Hz), 134.7 (d,  $J$  = 3.4 Hz), 134.3 (d,  $J$  = 1.8 Hz), 129.6 (d,  $J$  = 8.5

Hz), 116.7 (d,  $J = 22.8$  Hz), 109.7 (d,  $J = 21.5$  Hz), 26.6. IR 3088.9, 1677.3, 1583.0, 1484.9, 1391.0, 1351.1, 1248.8, 1040.3, 899.6  $\text{cm}^{-1}$ ; HRMS (ESI<sup>+</sup>) (m/z) calcd. for  $\text{C}_8\text{H}_7\text{BrFO}$  [M+H]<sup>+</sup> 216.9659; found 216.9668.

#### 1-(3-Fluorophenyl)propan-1-one (4ar)

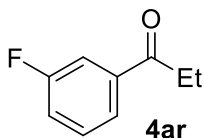

MeCN (10 mL) was used as the solvent instead of EtOH. **4ar**<sup>49</sup> was purified by flash column chromatography (ethyl acetate/hexane = 1:20 to 1:5) as a light-yellow oil (126 mg, 83%). <sup>1</sup>H-NMR (400 MHz,  $\text{CDCl}_3$ )  $\delta$ : 7.73 (d,  $J = 7.8$  Hz, 1H), 7.67–7.62 (m, 1H), 7.48–7.41 (m, 1H), 7.29–7.22 (m, 1H), 2.96 (q,  $J = 7.2$  Hz, 2H), 1.21 (t,  $J = 7.4$  Hz, 3H). <sup>13</sup>C-NMR (100 MHz,  $\text{CDCl}_3$ )  $\delta$ : 199.6 (d,  $J = 2.1$  Hz), 161.8 (d,  $J = 246$  Hz), 139.1 (d,  $J = 6.0$  Hz), 130.3 (d,  $J = 7.6$  Hz), 123.8 (d,  $J = 3.0$  Hz), 119.9 (d,  $J = 21.3$  Hz), 114.8 (d,  $J = 21.9$  Hz), 32.1, 8.2. IR 2940.6, 1687.8, 1586.4, 1439.3, 1350.4, 1244.9, 1165.4, 780.7  $\text{cm}^{-1}$ ; HRMS (ESI<sup>+</sup>) (m/z) calcd. for  $\text{C}_9\text{H}_{10}\text{FO}$  [M+H]<sup>+</sup> 153.0710; found 153.0713.

#### 4-Bromobenzaldehyde (4as)

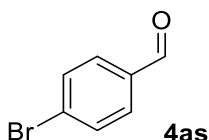

MeCN (10 mL) was used as the solvent instead of EtOH. **4as**<sup>31</sup> was purified by flash column chromatography (ethyl acetate/hexane = 1:20 to 1:5) as a light-yellow oil (124 mg, 67%). <sup>1</sup>H-NMR (400 MHz,  $\text{CDCl}_3$ )  $\delta$ : 9.97 (s, 1H), 7.76–7.71 (m, 2H), 7.70–7.65 (m, 2H). <sup>13</sup>C-NMR (100 MHz,  $\text{CDCl}_3$ )  $\delta$ : 191.2, 135.2, 132.6, 131.1, 129.9. IR 1685.5, 1576.3, 1473.0, 1379.3, 1198.1, 1147.2, 1058.3, 806.8  $\text{cm}^{-1}$ ; HRMS (ESI<sup>+</sup>) (m/z) calcd. for  $\text{C}_7\text{H}_6\text{BrO}$  [M+H]<sup>+</sup> 184.9597; found 184.9590.

#### 2-Acetyl-6-methoxy naphthalene (4at)

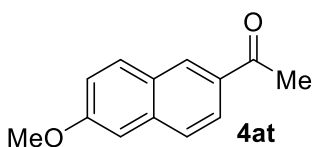

**4at**<sup>50</sup> was purified by flash column chromatography (ethyl acetate/hexane = 1:10 to 1:5) as a white solid (170 mg, 85%). M.P. 109–111 °C. <sup>1</sup>H-NMR (400 MHz,  $\text{CDCl}_3$ )  $\delta$ : 8.38 (s, 1H), 7.98 (dd,  $J = 8.6, 1.8$  Hz, 1H), 7.83 (d,  $J = 8.9$  Hz, 1H), 7.74 (d,  $J = 8.6$  Hz, 1H), 7.18 (dd,  $J = 8.9, 2.5$  Hz, 1H), 7.14 (d,  $J = 2.5$  Hz, 1H), 3.94 (s, 3H), 2.69 (s, 3H). <sup>13</sup>C-NMR (100 MHz,  $\text{CDCl}_3$ )  $\delta$ : 197.9, 159.9, 137.4, 132.8, 131.2, 130.2, 128.0, 127.2, 124.8, 119.8, 105.9, 55.5, 26.6. IR 1669.45, 1614.38, 1468.06, 1355.57, 1267.16, 1194.54, 1014.38, 857.77  $\text{cm}^{-1}$ ; HRMS (ESI<sup>+</sup>) (m/z) calcd. for  $\text{C}_{13}\text{H}_{13}\text{O}_2$  [M+H]<sup>+</sup> 201.0910; found 201.0904.

#### 4-Methylbenzaldehyde (4au)

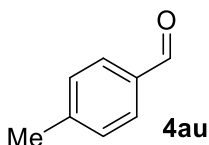

MeCN (10 mL) was used as the solvent instead of EtOH. **4au**<sup>33</sup> was purified by flash column chromatography (ethyl acetate/hexane = 1:20 to 1:5) as a light-yellow oil (76.9 mg, 64%). <sup>1</sup>H-NMR (400 MHz,  $\text{CDCl}_3$ )  $\delta$ : 9.95 (s, 1H), 7.75 (d,  $J = 8.1$  Hz, 2H), 7.31 (d,  $J = 7.8$  Hz, 2H), 2.43 (s, 3H). <sup>13</sup>C-NMR (100 MHz,  $\text{CDCl}_3$ )  $\delta$ : 192.1, 145.6, 134.3, 129.9, 129.8, 22.0. IR 2824.6, 2733.2, 1691.5, 1602.8, 1386.5, 1301.7, 1208.8, 1109.2, 1040.0, 844.9  $\text{cm}^{-1}$ ; HRMS (ESI<sup>+</sup>) (m/z) calcd. for  $\text{C}_8\text{H}_9\text{O}$  [M+H]<sup>+</sup> 121.0648; found 121.0654.

### 2-Fluorobenzaldehyde (4av)

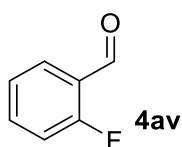

MeCN (10 mL) was used as the solvent instead of EtOH. **4av**<sup>31</sup> was purified by flash column chromatography (ethyl acetate/hexane = 1:10 to 1:5) as a light-yellow oil (62.1 mg, 50%). <sup>1</sup>H-NMR (400 MHz, CDCl<sub>3</sub>) δ: 10.33 (s, 1H), 7.82 (td, *J* = 7.4, 2.0 Hz, 1H), 7.64–7.57 (m, 1H), 7.29–7.23 (m, 1H), 7.19–7.12 (m, 1H). <sup>13</sup>C-NMR (100 MHz, CDCl<sub>3</sub>) δ: 186.8 (d, *J* = 6.6 Hz), 163.2 (d, *J* = 257 Hz), 136.2 (d, *J* = 9.1 Hz), 128.5 (d, *J* = 1.9 Hz), 124.5 (d, *J* = 3.8 Hz), 124.0 (d, *J* = 7.8 Hz), 116.2 (d, *J* = 20.3 Hz). IR 1693.7, 1609.6, 1583.1, 1481.5, 1457.5, 1400.5, 1273.1, 1188.0, 1095.9, 758.7 cm<sup>-1</sup>; HRMS (ESI<sup>+</sup>) (*m/z*) calcd. for C<sub>7</sub>H<sub>6</sub>FO [M+H]<sup>+</sup> 125.0397; found 125.0398.

### 3-Methoxybenzaldehyde (4aw)

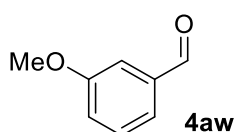

MeCN (10 mL) was used as the solvent instead of EtOH. **4aw**<sup>51</sup> was purified by flash column chromatography (ethyl acetate/hexane = 1:10 to 1:5) as a light-yellow oil (84.4 mg, 62%). <sup>1</sup>H-NMR (400 MHz, CDCl<sub>3</sub>) δ: 9.97 (s, 1H), 7.47–7.43 (m, 2H), 7.40–7.38 (m, 1H), 7.19–7.15 (m, 1H), 3.86 (s, 3H). <sup>13</sup>C-NMR (100 MHz, CDCl<sub>3</sub>) δ: 192.3, 160.3, 137.9, 130.2, 123.7, 121.7, 112.2, 55.6. IR 2837.8, 2730.0, 1697.0, 1589.8, 1482.7, 1459.9, 1389.1, 1146.2, 1038.2, 778.5 cm<sup>-1</sup>; HRMS (ESI<sup>+</sup>) (*m/z*) calcd. for C<sub>8</sub>H<sub>9</sub>O<sub>2</sub> [M+H]<sup>+</sup> 137.0597; found 137.0601.

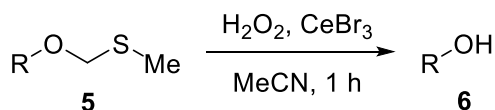

**General Procedure IV:** To a stirred solution of compound **5** (1 mmol) in MeCN (5 mL) were added CeBr<sub>3</sub> (19.0 mg, 0.05 mmol) and 30% H<sub>2</sub>O<sub>2</sub> (100 μL, 1 mmol) at rt. After completion of the addition, the resulting mixture was allowed to stir at room temperature for 1 h. Then the mixture was quenched by aqueous Na<sub>2</sub>S<sub>2</sub>O<sub>3</sub> (0.1 M, 20 mL) and ethyl acetate (20 mL). The organic fractions were collected, and the aqueous phase was extracted with ethyl acetate (3 × 20 mL). The combined organic fractions were washed with brine, dried over Na<sub>2</sub>SO<sub>4</sub>, filtered, and concentrated under reduced pressure. The residue was purified by flash column chromatography to give compound **6**.

### 2-Phenylethanol (6a)

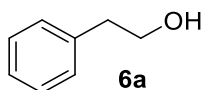

**6a**<sup>52</sup> was purified by flash column chromatography (ethyl acetate/hexane = 1:10 to 1:3) as a light-yellow oil (85.5 mg, 70%). <sup>1</sup>H-NMR (400 MHz, CDCl<sub>3</sub>) δ: 7.35–7.31 (m, 2H), 7.27–7.23 (m, 3H), 3.81 (t, *J* = 6.7 Hz, 2H), 2.85 (t, *J* = 6.6 Hz, 2H), 1.98 (brs, 1H). <sup>13</sup>C-NMR (100 MHz, CDCl<sub>3</sub>) δ: 138.6, 129.1, 128.6, 126.5, 63.7, 39.2. IR 3323.1, 3027.4, 2939.0, 2872.9, 1601.6, 1494.2, 1450.5, 1174.6, 1042.0, 907.3, 854.1, 742.1, 695.5, 570.2, 491.9 cm<sup>-1</sup>; HRMS (ESI<sup>+</sup>) (*m/z*) calcd. for C<sub>8</sub>H<sub>10</sub>O [M+H]<sup>+</sup> 123.0804; found 123.0809.

### 2-Cyanoethanol (6b)

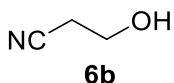

Solid Na<sub>2</sub>S<sub>2</sub>O<sub>3</sub> (316 mg, 2 mmol) was used to quench the reaction instead of an aqueous solution, and the resulting mixture was evaporated directly. **6b**<sup>53</sup> was purified by flash column chromatography (ethyl acetate/hexane = 1:5 to 2:1) as a light-yellow oil (59.7 mg, 84%). <sup>1</sup>H-NMR (400 MHz, CDCl<sub>3</sub>) δ: 3.84 (t, *J* = 6.0 Hz, 2H), 3.18 (s, 1H), 2.59 (t, *J* = 6.0 Hz, 2H). <sup>13</sup>C-NMR (101 MHz, CDCl<sub>3</sub>) δ: 118.5, 57.7, 21.5. IR 3417.4, 2899.2, 2254.3, 1723.4, 1638.2, 1414.3, 1326.5, 1171.0, 1119.1, 1051.1, 852.1, 576.1 cm<sup>-1</sup>; HRMS (ESI<sup>+</sup>) (*m/z*) calcd. for C<sub>3</sub>H<sub>6</sub>NO [M+H]<sup>+</sup> 72.0444; found 72.0447.

### 2-Phenoxyethanol (6c)

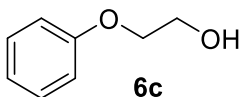

**6c**<sup>54</sup> was purified by flash column chromatography (ethyl acetate/hexane = 1:10 to 1:3) as a light-yellow oil (98.1 mg, 71%). <sup>1</sup>H-NMR (400 MHz, CDCl<sub>3</sub>) δ: 7.28 (t, *J* = 7.4 Hz, 2H), 7.00-6.92 (m, 3H), 4.06 (t, *J* = 4.2 Hz, 2H), 3.94 (t, *J* = 4.2 Hz, 2H), 2.53 (s, 1H). <sup>13</sup>C-NMR (100 MHz, CDCl<sub>3</sub>) δ: 158.7, 129.6, 121.2, 114.6, 69.2, 61.5. IR 3385.3, 2930.7, 1721.9, 1594.2, 1492.3, 1455.4, 1327.8, 1298.3, 1239.6, 1169.0, 1128.0, 1078.0, 1042.7, 957.2, 913.3, 791.7, 751.0, 690.3, 604.3, 554.6, 509.1, 482.1 cm<sup>-1</sup>; HRMS (ESI<sup>+</sup>) (*m/z*) calcd. for C<sub>8</sub>H<sub>11</sub>O<sub>2</sub> [M+H]<sup>+</sup> 139.0754; found 139.0751.

### Cyclohexylmethanol (6d)

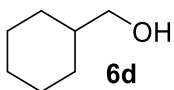

Solid Na<sub>2</sub>S<sub>2</sub>O<sub>3</sub> (316 mg, 2 mmol) was used to quench the reaction instead of an aqueous solution, and the resulting mixture was evaporated directly. **6d**<sup>55</sup> was purified by flash column chromatography (ethyl acetate/hexane = 1:10 to 1:3) as a light-yellow oil (74.2 mg, 65%). <sup>1</sup>H-NMR (400 MHz, CDCl<sub>3</sub>) δ: 3.37 (d, *J* = 6.4 Hz, 2H), 2.26 (s, 1H), 1.73–1.61 (m, 5H), 1.47–1.39 (m, 1H), 1.26–1.11 (m, 3H), 0.93–0.83 (m, 2H). <sup>13</sup>C-NMR (100 MHz, CDCl<sub>3</sub>) δ: 69.0, 40.7, 29.7, 26.7, 26.0. IR 3334.1, 2922.1, 2851.7, 1718.9, 1448.9, 1338.8, 1171.1, 1089.1, 1019.2, 973.0, 943.1, 891.7, 835.9, 778.5, 744.9, 554.1, 524.5, 486.3 cm<sup>-1</sup>; HRMS (ESI<sup>+</sup>) (*m/z*) calcd. for C<sub>7</sub>H<sub>15</sub>O [M+H]<sup>+</sup> 115.1117; found 115.1121.

### Cyclopentylmethanol (6e)

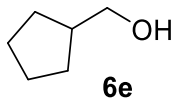

Solid Na<sub>2</sub>S<sub>2</sub>O<sub>3</sub> (316 mg, 2 mmol) was used to quench the reaction instead of an aqueous solution, and the resulting mixture was evaporated directly. **6e**<sup>56</sup> was purified by flash column chromatography (ethyl acetate/hexane = 1:10 to 1:3) as a light-yellow oil (73.1 mg, 73%). <sup>1</sup>H-NMR (400 MHz, CDCl<sub>3</sub>) δ: 3.50–3.48 (m, 2H), 2.11–2.04 (m, 1H), 1.77–1.70 (m, 2H), 1.60–1.51 (m, 4H), 1.24–1.19 (m, 2H). <sup>13</sup>C-NMR (100 MHz, CDCl<sub>3</sub>) δ: 67.5, 42.2, 29.2, 25.6. IR 3318.8, 2946.4, 2864.3, 1449.4, 1157.9, 1030.7, 934.7, 624.7 cm<sup>-1</sup>; HRMS (ESI<sup>+</sup>) (*m/z*) calcd. for C<sub>6</sub>H<sub>16</sub>NO [M+NH<sub>4</sub>]<sup>+</sup> 118.1226; found 118.1224.

### 1-Undecanol (6f)

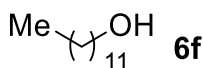

**6f**<sup>57</sup> was purified by flash column chromatography (ethyl acetate/hexane = 1:10 to 1:3) as a light-yellow oil (123 mg, 66%). <sup>1</sup>H-NMR (400 MHz, CDCl<sub>3</sub>) δ: 3.61 (t, *J* = 6.6 Hz,

2H), 1.56–1.51 (m, 2H), 1.27–1.23 (m, 18H), 0.84 (t,  $J = 6.3$  Hz, 3H).  $^{13}\text{C}$ -NMR (100 MHz,  $\text{CDCl}_3$ )  $\delta$ : 63.3, 32.7, 32.1, 29.8, 29.77, 29.74, 29.6, 29.5, 25.9, 22.8, 14.2. IR 3353.3, 2921.8, 2853.4, 1461.6, 1350.9, 1173.6, 1046.6, 720.5, 528.6  $\text{cm}^{-1}$ ; HRMS (ESI<sup>+</sup>) ( $m/z$ ) calcd. for  $\text{C}_{12}\text{H}_{27}\text{O}$  [ $\text{M}+\text{H}$ ]<sup>+</sup> 187.2056; found 187.2065.

### 3-[(*tert*-Butyloxycarbonyl)amino]propanol (**6g**)

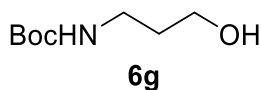

Solid  $\text{Na}_2\text{S}_2\text{O}_3$  (316 mg, 2 mmol) was used to quench the reaction instead of an aqueous solution, and the resulting mixture was evaporated directly. **6g**<sup>58</sup> was purified by flash column chromatography (ethyl acetate/hexane = 1:10 to 1:2) as a light-yellow oil (123 mg, 70%).  $^1\text{H}$ -NMR (400 MHz,  $\text{CDCl}_3$ )  $\delta$ : 4.91 (s, 1H), 3.61 (t,  $J = 5.3$  Hz, 2H), 3.29–3.24 (m, 2H), 1.67–1.64 (m, 2H), 1.41 (s, 9H).  $^{13}\text{C}$ -NMR (100 MHz,  $\text{CDCl}_3$ )  $\delta$ : 157.2, 79.6, 59.3, 37.1, 32.9, 28.5. IR 3348.7, 2974.1, 1682.7, 1519.6, 1452.0, 1393.9, 1365.4, 1163.9, 1046.1, 866.8, 777.9, 596.3  $\text{cm}^{-1}$ ; HRMS (ESI<sup>+</sup>) ( $m/z$ ) calcd. for  $\text{C}_8\text{H}_{18}\text{NO}_3$  [ $\text{M}+\text{H}$ ]<sup>+</sup> 176.1281; found 176.1283.

### 3-(3-Trifluoromethylphenyl)propanol (**6h**)

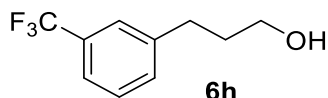

**6h**<sup>59</sup> was purified by flash column chromatography (ethyl acetate/hexane = 1:10 to 1:3) as a light-yellow oil (167 mg, 82%).  $^1\text{H}$ -NMR (400 MHz,  $\text{CDCl}_3$ )  $\delta$ : 7.45–7.38 (m, 4H), 3.67 (t,  $J = 6.3$  Hz, 2H), 2.76 (t,  $J = 7.8$  Hz, 2H), 1.94–1.87 (m, 2H).  $^{13}\text{C}$ -NMR (100 MHz,  $\text{CDCl}_3$ )  $\delta$ : 142.9, 132.0, 130.7 (q,  $J = 32.0$  Hz), 128.9, 125.2 (q,  $J = 4.0$  Hz), 122.8 (q,  $J = 4.0$  Hz), 120.3 (q,  $J = 271.0$  Hz), 62.0, 34.1, 32.0. IR 3325.8, 2941.1, 1448.4, 1325.3, 1160.5, 1118.6, 1067.8, 903.7, 798.8, 740.0, 700.5, 658.7, 516.0  $\text{cm}^{-1}$ ; HRMS (ESI<sup>+</sup>) ( $m/z$ ) calcd. for  $\text{C}_{10}\text{H}_{12}\text{F}_3\text{O}$  [ $\text{M}+\text{H}$ ]<sup>+</sup> 205.0835; found 205.0839.

### 2-Naphthaleneethanol (**6i**)

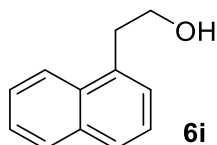

**6i**<sup>60</sup> was purified by flash column chromatography (ethyl acetate/hexane = 1:10 to 1:3) as a light-yellow oil (127 mg, 74%).  $^1\text{H}$ -NMR (400 MHz,  $\text{CDCl}_3$ )  $\delta$ : 8.05 (d,  $J = 8.2$  Hz, 1H), 7.87 (d,  $J = 7.8$  Hz, 1H), 7.76 (d,  $J = 8.0$  Hz, 1H), 7.56–7.48 (m, 2H), 7.45–7.38 (m, 2H), 3.98 (t,  $J = 6.6$  Hz, 2H), 3.34 (t,  $J = 6.6$  Hz, 2H).  $^{13}\text{C}$ -NMR (100 MHz,  $\text{CDCl}_3$ )  $\delta$ : 134.5, 134.1, 132.2, 129.0, 127.5, 127.3, 126.2, 125.8, 125.6, 123.8, 63.2, 36.3. IR 3327.4, 3046.4, 2943.2, 2875.6, 1716.1, 1593.9, 1509.5, 1391.4, 1164.1, 1034.7, 865.7, 772.7, 732.7, 597.7, 551.5, 422.3  $\text{cm}^{-1}$ ; HRMS (ESI<sup>+</sup>) ( $m/z$ ) calcd. for  $\text{C}_{12}\text{H}_{12}\text{NaO}$  [ $\text{M}+\text{Na}$ ]<sup>+</sup> 195.0780; found 195.0781.

### Cyclohexanol (**6j**)

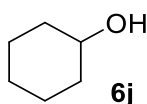

Solid  $\text{Na}_2\text{S}_2\text{O}_3$  (316 mg, 2 mmol) was used to quench the reaction instead of an aqueous solution, and the resulting mixture was evaporated directly. **6j**<sup>61</sup> was purified by flash column chromatography (ethyl acetate/hexane = 1:10 to 1:3) as a light-yellow oil (90.1 mg, 90%).  $^1\text{H}$ -NMR (400 MHz,  $\text{CDCl}_3$ )  $\delta$ : 3.62–3.59 (m, 1H), 1.92–1.87 (m, 1H), 1.77–1.70 (m, 2H), 1.57–1.45



(m, 3H), 1.31–1.14 (m, 5H). <sup>13</sup>C-NMR (100 MHz, CDCl<sub>3</sub>) δ: 70.3, 35.6, 25.5, 24.1. IR 3341.3, 2997.5, 2855.4, 1715.5, 1449.6, 1367.0, 1174.8, 1059.1, 964.0, 889.9, 841.5, 781.7 cm<sup>-1</sup>; HRMS (ESI<sup>+</sup>) (m/z) calcd. for C<sub>6</sub>H<sub>13</sub>O [M+H]<sup>+</sup> 101.0961; found 101.0956.

#### Tetrahydro-4-pyranol (**6k**)

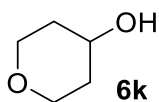

Solid Na<sub>2</sub>S<sub>2</sub>O<sub>3</sub> (316 mg, 2 mmol) was used to quench the reaction instead of an aqueous solution, and the resulting mixture was evaporated directly. **6k**<sup>62</sup> was purified by flash column chromatography (ethyl acetate/hexane = 1:5 to 2:1) as a light-yellow oil (87.8 mg, 86%).

<sup>1</sup>H-NMR (400 MHz, CDCl<sub>3</sub>) δ: 3.92 (dt, *J* = 11.7, 4.4 Hz, 2H), 3.88–3.81 (m, 1H), 3.46–3.40 (m, 2H), 1.91–1.87 (m, 2H), 1.74 (s, 1H), 1.60–1.51 (m, 2H). <sup>13</sup>C-NMR (100 MHz, CDCl<sub>3</sub>) δ: 67.1, 65.8, 35.6. IR 3382.2, 2945.2, 2854.8, 1652.8, 1450.3, 1368.0, 1285.3, 1227.1, 1133.0, 1077.0, 1032.7, 1004.5, 984.6, 857.2, 813.7, 611.6, 517.5 cm<sup>-1</sup>; HRMS (ESI<sup>+</sup>) (m/z) calcd. for C<sub>5</sub>H<sub>11</sub>O<sub>2</sub> [M+H]<sup>+</sup> 103.0754; found 103.0756.

#### *trans*-4-[(*tert*-Butyloxycarbonyl)amino]cyclohexan-1-ol (**6l**)

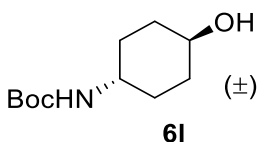

Solid Na<sub>2</sub>S<sub>2</sub>O<sub>3</sub> (316 mg, 2 mmol) was used to quench the reaction instead of an aqueous solution, and the resulting mixture was evaporated directly. **6l**<sup>63</sup> was purified by flash column chromatography (ethyl acetate/hexane = 1:10 to 1:2) as a white solid (129 mg, 60%). M.P. 172–174 °C.

<sup>1</sup>H-NMR (400 MHz, CDCl<sub>3</sub>) δ: 4.38 (s, 1H), 3.60–3.55 (m, 1H), 3.40 (s, 1H), 2.00–1.94 (m, 4H), 1.77 (s, 1H), 1.42 (s, 9H), 1.37–1.34 (m, 2H), 1.16–1.12 (m, 2H). <sup>13</sup>C-NMR (100 MHz, CDCl<sub>3</sub>) δ: 155.4, 79.4, 69.9, 49.0, 34.1, 31.3, 28.5. IR 3340.1, 2978.6, 2933.5, 2858.7, 2280.5, 2114.4, 1678.5, 1523.4, 1451.4, 1363.5, 1312.0, 1263.3, 1228.1, 1063.7, 948.5, 895.1, 782.9, 740.2, 619.0, 521.6, 461.4, 427.1 cm<sup>-1</sup>; HRMS (ESI<sup>+</sup>) (m/z) calcd. for C<sub>11</sub>H<sub>22</sub>NO<sub>3</sub> [M+H]<sup>+</sup> 216.1594; found 216.1592.

#### (1*R*,2*S*,5*R*) (-)-Menthol (**6m**)

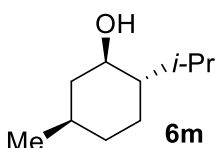

**6m**<sup>64</sup> was purified by flash column chromatography (ethyl acetate/hexane = 1:10 to 1:3) as a light-yellow oil (127 mg, 81%). <sup>1</sup>H-NMR (400 MHz, CDCl<sub>3</sub>) δ: 3.37 (td, *J* = 10.4, 4.3 Hz, 1H), 2.19–2.14 (m, 1H), 1.98–1.93 (m, 1H), 1.68–1.58 (m, 2H), 1.43–1.41 (m, 1H), 1.13–1.07 (m, 1H), 0.96–0.90 (m, 8H), 0.87–0.82 (m, 1H), 0.80 (d, *J* =

1.5 Hz, 3H). <sup>13</sup>C-NMR (100 MHz, CDCl<sub>3</sub>) δ: 71.7, 50.3, 45.2, 34.7, 31.8, 26.0, 23.3, 22.4, 21.2, 16.2. IR 3359.0, 2952.5, 2921.3, 2867.8, 1723.4, 1454.6, 1368.9, 1176.1, 1099.4, 1027.0, 985.3, 914.5, 874.4, 842.6, 771.2, 545.3 cm<sup>-1</sup>; HRMS (ESI<sup>+</sup>) (m/z) calcd. for C<sub>10</sub>H<sub>20</sub>NaO [M+Na]<sup>+</sup> 179.1406; found 179.1407. [α]<sub>D</sub><sup>25</sup> = -51 (*c* 0.1, EtOH)

#### 1,2:3,4-Di-*O*-isopropylidene- $\alpha$ -D-galactopyranose (**6n**)

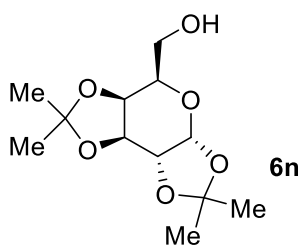

**6n**

**6n**<sup>65</sup> was purified by flash column chromatography (ethyl acetate/hexane = 1:5 to 2:1) as a light-yellow oil (195 mg, 75%). <sup>1</sup>H-NMR (400 MHz, CDCl<sub>3</sub>) δ: 5.56 (d, *J* = 5.0 Hz, 1H), 4.60 (d, *J* = 7.9 Hz, 1H), 4.34–4.26 (m, 2H), 3.87–3.83 (m, 2H), 3.77–3.73 (m, 1H), 1.53 (s, 3H), 1.46 (s, 3H), 1.33 (s, 6H). <sup>13</sup>C-NMR (100 MHz, CDCl<sub>3</sub>) δ: 109.6, 108.8, 96.4, 71.8, 70.9, 70.7, 68.2, 62.5, 26.2, 26.1, 25.1, 24.4. IR 3493.7, 2986.0, 2932.9, 1723.5, 1457.1, 1377.8, 1253.2, 1209.7, 1168.7, 1063.3, 997.7, 890.8, 858.7, 802.4, 769.0, 644.2, 552.8, 509.7 cm<sup>-1</sup>; HRMS (ESI<sup>+</sup>) (*m/z*) calcd. for C<sub>12</sub>H<sub>21</sub>O<sub>6</sub> [M+H]<sup>+</sup> 261.1333; found 261.1335. [α]<sub>D</sub><sup>25</sup> = -59 (*c* 0.1, CHCl<sub>3</sub>)

#### (-)-Borneol (6o)

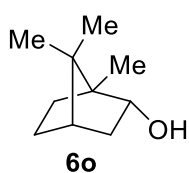

**6o**

**6o**<sup>66</sup> was purified by flash column chromatography (ethyl acetate/hexane = 1:10 to 1:3) as a white solid (128 mg, 83%). M.P. 207–210 °C. <sup>1</sup>H-NMR (400 MHz, CDCl<sub>3</sub>) δ: 4.01 (ddd, *J* = 10.0, 3.3, 1.6 Hz, 1H), 2.30–2.23 (m, 1H), 1.91–1.84 (m, 1H), 1.75–1.69 (m, 1H), 1.60 (t, *J* = 4.6 Hz, 1H), 1.27–1.20 (m, 2H), 0.91 (dd, *J* = 13.4, 3.4 Hz, 1H), 0.86–0.84 (m, 9H). <sup>13</sup>C-NMR (100 MHz, CDCl<sub>3</sub>) δ: 77.5, 49.6, 48.2, 45.2, 39.2, 28.4, 26.0, 20.3, 18.8, 13.5. IR 3299.0, 2945.2, 2874.9, 1451.8, 1380.2, 1303.0, 1232.1, 1139.3, 1107.5, 1053.4, 1023.0, 941.3, 828.4, 656.6, 528.1, 461.2 cm<sup>-1</sup>; HRMS (ESI<sup>+</sup>) (*m/z*) calcd. for C<sub>10</sub>H<sub>18</sub>KO [M+K]<sup>+</sup> 193.0989; found 193.0980. [α]<sub>D</sub><sup>25</sup> = -34 (*c* 0.1, EtOH).

#### 2-Methyl-1-phenylpropan-2-ol (6p)

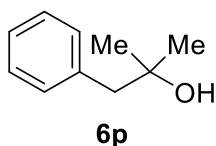

**6p**

**6p**<sup>64</sup> was purified by flash column chromatography (ethyl acetate/hexane = 1:10 to 1:3) as a light-yellow oil (116 mg, 77%). <sup>1</sup>H-NMR (400 MHz, CDCl<sub>3</sub>) δ: 7.32–7.20 (m, 5H), 2.76 (s, 2H), 1.22 (s, 6H). <sup>13</sup>C-NMR (100 MHz, CDCl<sub>3</sub>) δ: 137.9, 130.6, 128.3, 126.6, 70.9, 49.9, 29.3. IR 3389.7, 3028.6, 2971.0, 2927.6, 1709.0, 1493.1, 1455.1, 1373.1, 1306.5, 1207.1, 1146.6, 1031.3, 974.3, 900.0, 777.7, 725.4, 698.2, 608.2, 516.3, 466.3 cm<sup>-1</sup>; HRMS (ESI<sup>+</sup>) (*m/z*) calcd. for C<sub>10</sub>H<sub>14</sub>NaO [M+Na]<sup>+</sup> 173.0937; found 173.0938.

#### 7-Hydroxy-3,7-dimethyloctanal (6q)

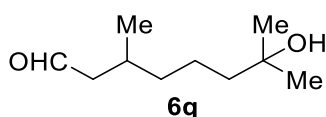

**6q**

**6q**<sup>67</sup> was purified by flash column chromatography (ethyl acetate/hexane = 1:10 to 1:2) as a light-yellow oil (141 mg, 82%). <sup>1</sup>H-NMR (400 MHz, CDCl<sub>3</sub>) δ: 9.69 (t, *J* = 2.3 Hz, 1H), 2.36–2.32 (m, 1H), 2.22–2.15 (m, 1H), 2.04–1.99 (m, 1H), 1.45–1.30 (m, 6H), 1.19–1.15 (m, 6H), 0.90 (d, *J* = 6.7 Hz, 3H). <sup>13</sup>C-NMR (100 MHz, CDCl<sub>3</sub>) δ: 203.2, 71.1, 51.1, 43.9, 37.4, 29.34, 29.25, 28.2, 21.7, 20.0. IR 3382.7, 2935.4, 1718.7, 1462.9, 1372.5, 1134.7, 937.1, 905.9, 761.9, 553.6, 482.7 cm<sup>-1</sup>; HRMS (ESI<sup>+</sup>) (*m/z*) calcd. for C<sub>10</sub>H<sub>20</sub>NaO<sub>2</sub> [M+Na]<sup>+</sup> 195.1356; found 195.1352.

#### 3,7-Dimethyloctan-3-ol (6r)

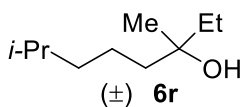

**6r**<sup>68</sup> was purified by flash column chromatography (ethyl acetate/hexane = 1:10 to 1:3) as a light-yellow oil (125 mg, 79%). <sup>1</sup>H-NMR (400 MHz, CDCl<sub>3</sub>) δ: 1.58–1.51 (m, 1H), 1.50–1.35 (m, 5H), 1.34–1.26 (m, 2H), 1.20–1.15 (m, 2H), 1.14 (s, 3H), 0.90–0.86 (m, 9H). <sup>13</sup>C-NMR (100 MHz, CDCl<sub>3</sub>) δ: 73.1, 41.7, 39.7, 34.4, 28.1, 26.5, 22.8, 21.7, 8.3. IR 3382.6, 2956.4, 1461.9, 1373.7, 1152.8, 1081.9, 972.8, 899.2, 840.1, 738.7, 612.3 cm<sup>-1</sup>; HRMS (ESI<sup>+</sup>) (m/z) calcd. for C<sub>10</sub>H<sub>22</sub>KO [M+K]<sup>+</sup> 197.1302; found 197.1301.

### 1-Adamantanol (6s)

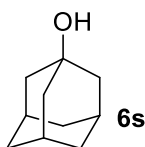

**6s**<sup>64</sup> was purified by flash column chromatography (ethyl acetate/hexane = 1:10 to 1:3) as a white solid (129 mg, 85%). M.P. 246–249 °C. <sup>1</sup>H-NMR (400 MHz, CDCl<sub>3</sub>) δ: 2.13 (s, 3H), 1.70 (d, *J* = 2.6 Hz, 6H), 1.64–1.56 (m, 6H). <sup>13</sup>C-NMR (100 MHz, CDCl<sub>3</sub>) δ: 68.4, 45.5, 36.2, 30.8. IR 3272.9, 2891.8, 2843.9, 1722.7, 1446.5, 1345.8, 1299.3, 1223.7, 1174.7, 1109.6, 1081.5, 976.6, 923.2, 809.3, 651.4, 548.4, 464.6, 432.5 cm<sup>-1</sup>; HRMS (ESI<sup>+</sup>) (m/z) calcd. for C<sub>10</sub>H<sub>16</sub>NaO [M+Na]<sup>+</sup> 175.1093; found 175.1090.

### 1-[4-[2-(*tert*-Butyldimethylsilyloxy)ethoxy]phenyl]-2-hydroxy-2-methylpropan-1-one (6t)

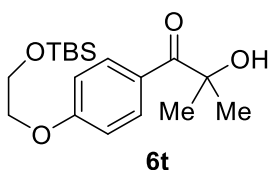

THF (5 mL) was used as the solvent instead of MeCN. **6t** was purified by flash column chromatography (ethyl acetate/hexane = 1:10 to 1:3) as a light-yellow oil (244 mg, 72%). <sup>1</sup>H-NMR (400 MHz, CDCl<sub>3</sub>) δ: 8.03 (d, *J* = 8.5 Hz, 2H), 6.93 (d, *J* = 8.5 Hz, 2H), 4.30 (s, 1H), 4.10 (t, *J* = 4.8 Hz, 2H), 3.97 (t, *J* = 4.8 Hz, 2H), 1.62 (s, 6H), 0.90 (s, 9H), 0.09 (s, 6H). <sup>13</sup>C-NMR (100 MHz, CDCl<sub>3</sub>) δ: 202.7, 163.0, 132.5, 126.0, 114.3, 75.9, 69.7, 61.9, 28.8, 26.0, 18.5, -5.1. IR 3454.2, 2931.6, 2858.5, 1736.9, 1663.6, 1598.3, 1571.8, 1507.4, 1463.8, 1416.8, 1368.4, 1306.8, 1252.4, 1161.5, 1128.4, 1053.9, 954.9, 832.0, 773.1, 728.5, 667.1, 586.8, 565.7, 510.9, 426.1 cm<sup>-1</sup>; HRMS (ESI<sup>+</sup>) (m/z) calcd. for C<sub>18</sub>H<sub>31</sub>O<sub>4</sub>Si [M+H]<sup>+</sup> 339.1986; found 339.1998.

### Thiophen-2-ylethanol (6u)

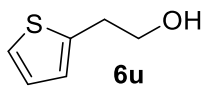

**6u**<sup>69</sup> was purified by flash column chromatography (ethyl acetate/hexane = 1:10 to 1:3) as a light-yellow oil (103 mg, 80%). <sup>1</sup>H-NMR (400 MHz, CDCl<sub>3</sub>) δ: 7.16 (dd, *J* = 5.1, 1.2 Hz, 1H), 6.95 (dd, *J* = 5.1, 3.4 Hz, 1H), 6.88–6.87 (m, 1H), 3.83 (t, *J* = 6.3 Hz, 2H), 3.06 (t, *J* = 6.4 Hz, 2H), 1.89 (s, 1H). <sup>13</sup>C-NMR (100 MHz, CDCl<sub>3</sub>) δ: 140.9, 127.1, 125.7, 124.1, 63.6, 33.4. IR 3327.40, 2936.70, 1433.76, 1239.20, 1132.01, 1041.30, 845.97, 821.23, 690.27, 494.72 cm<sup>-1</sup>; HRMS (ESI<sup>+</sup>) (m/z) calcd. for C<sub>6</sub>H<sub>9</sub>OS [M+H]<sup>+</sup> 129.0369; found 129.0370.

## 6. Gram-scale dethioacetalization of 3a and 5j under open-air condition

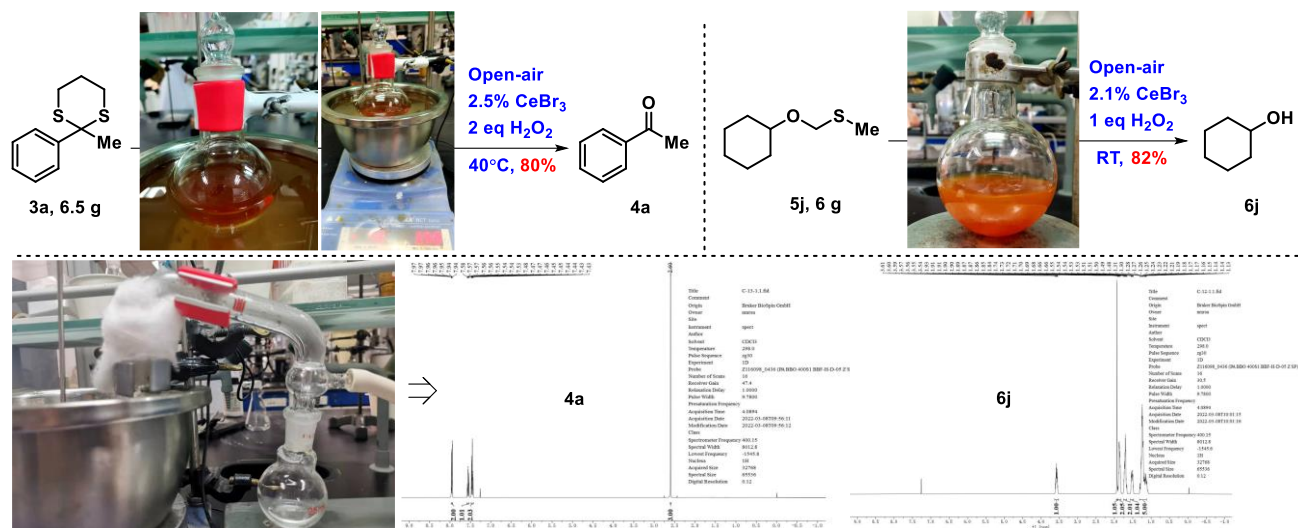

**Gram-scale synthesis of 4a:** To a stirred solution of compound **3a** (6.5 g, 30.9 mmol) in EtOH (150 mL) were added CeBr<sub>3</sub> (285 mg, 0.75 mmol) and H<sub>2</sub>O<sub>2</sub> (30%, 6.2 mL, 60 mmol). After completion of the addition, the resulting mixture was allowed to stir at 40 °C for additional 1 h. Then the reaction was quenched by solid Na<sub>2</sub>S<sub>2</sub>O<sub>3</sub> (9.5 g, 60 mmol), and stirred for 30 min followed by filtration. The resulting filtrate was evaporated and purified by vacuum distillation (131-139 °C/~80 Torr) to give compound **4a** (2.97 g, 80%).

**Gram-scale synthesis of 6j:** To a stirred solution of compound **5j** (6.0 g, 37.4 mmol) in MeCN (90 mL) were added CeBr<sub>3</sub> (300 mg, 0.79 mmol) and H<sub>2</sub>O<sub>2</sub> (30%, 3.9 mL, 37.4 mmol). After completion of the addition, the resulting mixture was allowed to stir at rt for additional 1 h. Then the reaction was quenched by solid Na<sub>2</sub>S<sub>2</sub>O<sub>3</sub> (5.9 g, 37.4 mmol), and stirred for 30 min followed by filtration. The resulting filtrate was evaporated and purified by vacuum distillation (107-113 °C/~80 Torr) to give compound **6j** (3.07 g, 82%).

## 7. Controlled experiments of bromide and cerium catalysts for dethioacetalization.

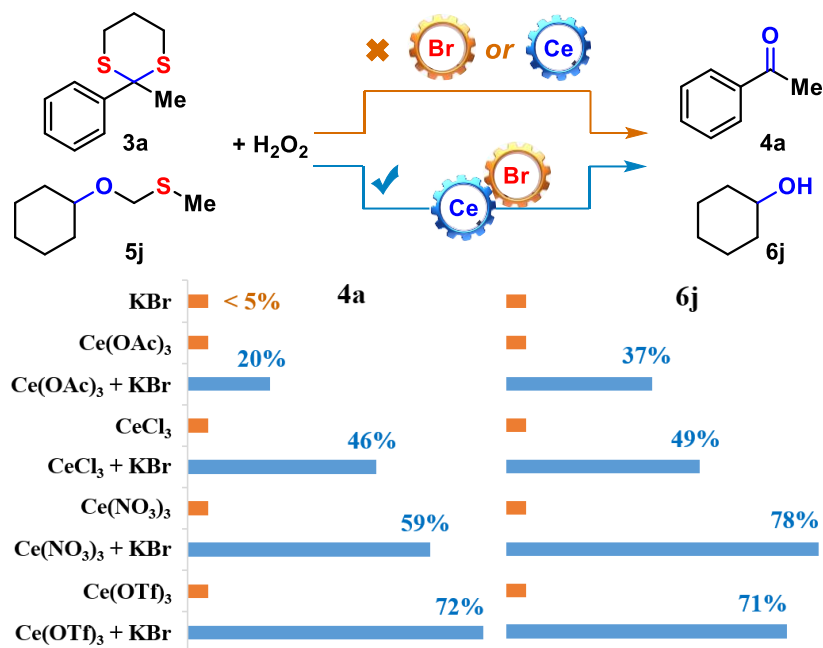

To a stirred solution of compound **3a** (21.0 mg, 0.1 mmol) in EtOH (1 mL) or **5j** (16.0 mg, 0.1 mmol) in MeCN (1 mL) were added KBr (with or without, 3.6 mg, 0.03 mmol), metal catalyst (0.01 mmol) and H<sub>2</sub>O<sub>2</sub> (30%, 20  $\mu$ L, 0.2 mmol for **3a**; 10  $\mu$ L, 0.1 mmol for **5j**). After completion of the addition, the reaction mixture was allowed to stir at rt for 1.5 h. The reaction was quenched by dilute aqueous Na<sub>2</sub>S<sub>2</sub>O<sub>3</sub> solution (0.1 M, 4 mL) and ethyl acetate (10 mL). The organic fractions were collected, and the aqueous phase was extracted with ethyl acetate (2  $\times$  10 mL). The combined organic fractions were washed with H<sub>2</sub>O, dried over Na<sub>2</sub>SO<sub>4</sub>, filtered, and concentrated under reduced pressure. Yield was determined by <sup>1</sup>H-NMR of the crude reaction mixture using CH<sub>2</sub>Br<sub>2</sub> as the internal reference. For compound **6j**, solid Na<sub>2</sub>S<sub>2</sub>O<sub>3</sub> (63.2 mg, 0.4 mmol) was added directly to quench the reaction instead of an aqueous solution, and the resulting mixture was evaporated directly.

### 8. Radical trapping (ABTS) experiments.

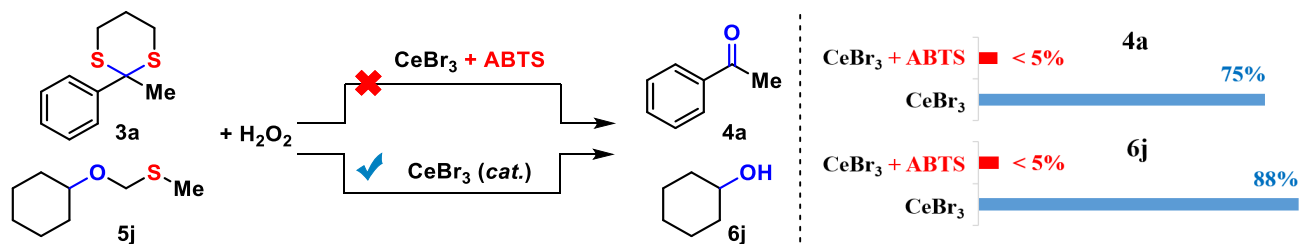

To a stirred solution of compound **3a** (21.0 mg, 0.1 mmol) in EtOH/H<sub>2</sub>O (10/1, 1.1 mL) or compound **5j** (16.0 mg, 0.1 mmol) in MeCN/H<sub>2</sub>O (10/1, 1.1 mL) were added ABTS (with or without, 110 mg, 0.2 mmol), and the mixture was stirred for 5 min. Then H<sub>2</sub>O<sub>2</sub> (30%, 20  $\mu$ L, 0.2 mmol for **3a**; 10  $\mu$ L, 0.1 mmol for **5j**) and CeBr<sub>3</sub> (3.8 mg, 0.01 mmol) were added, and the resulting solution was stirred at rt for 1.5 h. The reaction was quenched by dilute aqueous Na<sub>2</sub>S<sub>2</sub>O<sub>3</sub> solution (0.1 M, 4 mL) and ethyl acetate (10 mL). The organic fractions

were collected, and the aqueous phase was extracted with ethyl acetate (2 × 4 mL). The combined organic fractions were washed with H<sub>2</sub>O, dried over Na<sub>2</sub>SO<sub>4</sub>, filtered, and concentrated under reduced pressure. Yield was determined by <sup>1</sup>H-NMR of the crude reaction mixture using CH<sub>2</sub>Br<sub>2</sub> as the internal reference. For compound **6j**, solid Na<sub>2</sub>S<sub>2</sub>O<sub>3</sub> (63.2 mg, 0.4 mmol) was added to quench the reaction instead of an aqueous solution, and the resulting mixture was evaporated directly.

### 9. Isotopic labeling experiment.

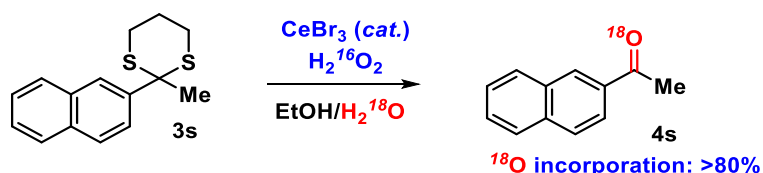

To a stirred solution of compound **3s** (13.0 mg, 0.05 mmol) in ethanol (1 mL) and H<sub>2</sub><sup>18</sup>O (0.2 mL) were added CeBr<sub>3</sub> (1.9 mg, 0.005 mmol) and 30% H<sub>2</sub>O<sub>2</sub> (10 μL, 0.1 mmol). After completion of the addition, the resulting mixture was allowed to stir at rt for 1.5 h. Then the mixture was quenched by aqueous Na<sub>2</sub>S<sub>2</sub>O<sub>3</sub> solution (0.1 M, 10 mL) and ethyl acetate (10 mL). The organic fractions were collected, and the aqueous phase was extracted with ethyl acetate (3 × 10 mL). The combined organic fractions were washed with brine, dried over Na<sub>2</sub>SO<sub>4</sub>, filtered, and concentrated under reduced pressure. The residue was purified by flash column chromatography (ethyl acetate/hexane = 1:10 to 1:3) to give compound **4s** (6.0 mg, 70%). MS = 173.1 for <sup>18</sup>O-**4s**, while MS = 171.2 for <sup>16</sup>O-**4s**.

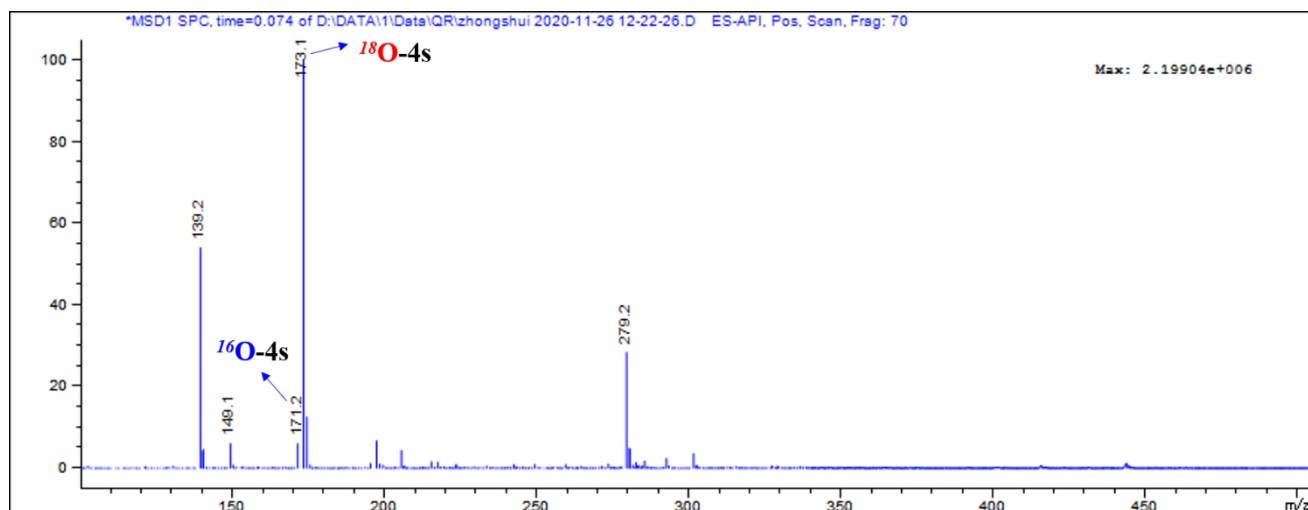

### 10. The isolation and confirmation of related side products.

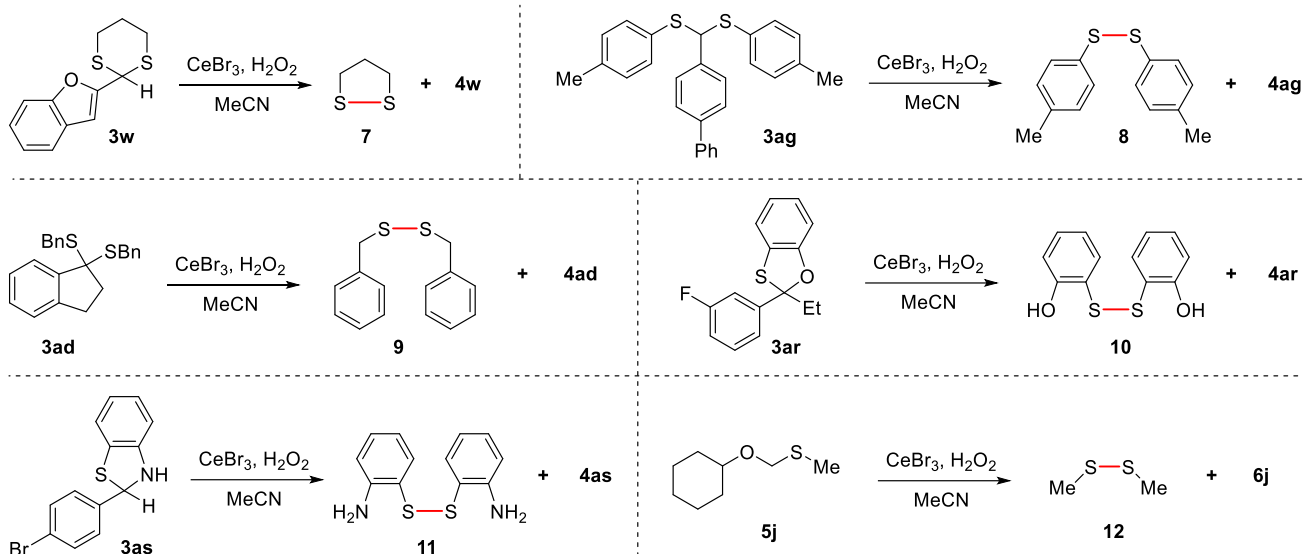

Disulfide **7-12** were isolated by flash column chromatography following the above **General Procedure III-IV** and confirmed by GC-MS, HRMS and NMR ( $^1\text{H}$  and  $^{13}\text{C}$ ).

### 1,2-Dithiolane (7)

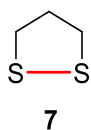

The purification of compound **7** always led to polymeric material<sup>70</sup>, so the reaction mixture of **3w** was passed through millipore filter (0.45  $\mu\text{m}$ ) directly after 5 min at rt and analyzed by GC-MS directly. Mass spectrum and retrieval results were listed below respectively, and compound **7** ( $m/z = 106.0$ ) was identified as 1,3-dithiolane.

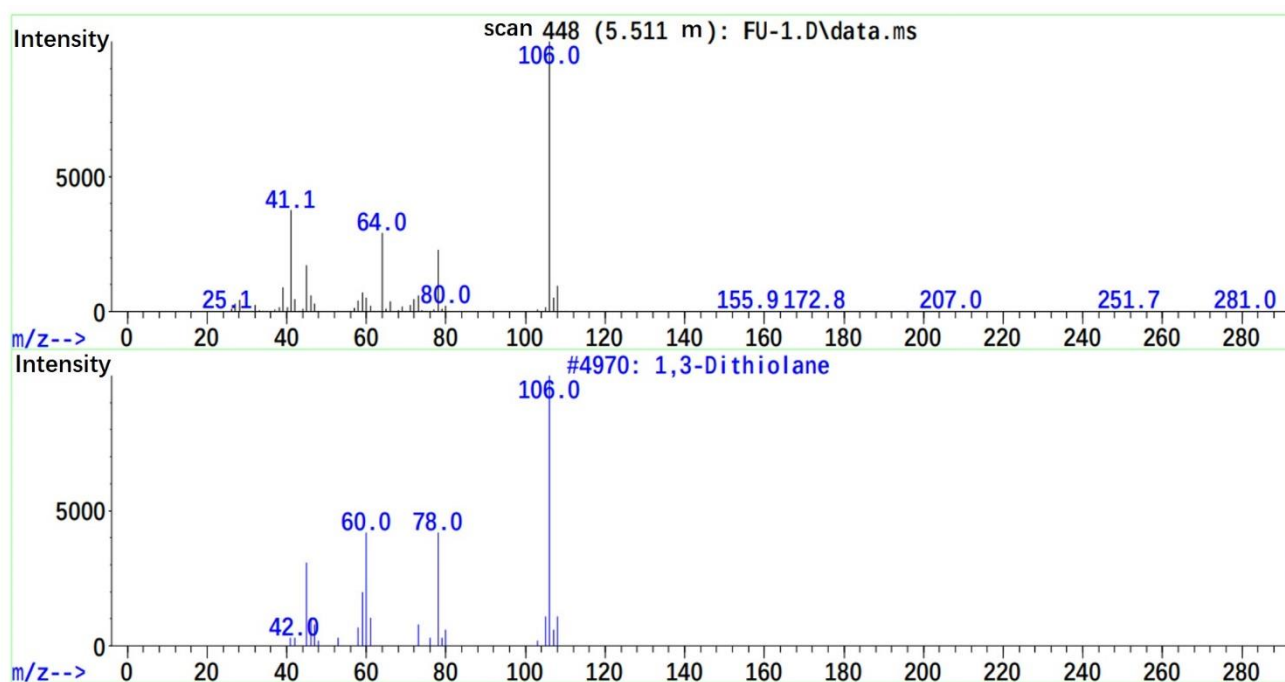

### Bis(4-methylphenyl) disulfide (**8**)

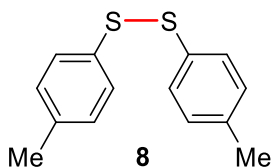

**8**<sup>71</sup> was purified by flash column chromatography (ethyl acetate/hexane = 1:40 to 1:20) as a light-yellow oil (207 mg, 84%) following the deprotection of **3ag** (1 mmol). <sup>1</sup>H-NMR (400 MHz, DMSO)  $\delta$ : 7.37 (d,  $J$  = 8.3 Hz, 4H), 7.16 (d,  $J$  = 8.0 Hz, 4H), 2.27 (s, 6H). <sup>13</sup>C-NMR (100 MHz, DMSO)  $\delta$ : 137.4, 132.6, 130.0, 128.1, 20.5. IR 1591.2, 1481.9, 1397.8, 1301.6, 1177.9, 1112.6, 1072.8, 1010.0, 794.3, 478.8 cm<sup>-1</sup>; HRMS (ESI<sup>+</sup>) (m/z) calcd. for C<sub>14</sub>H<sub>15</sub>S<sub>2</sub> [M+H]<sup>+</sup> 247.0610; found 247.0609.

### Dibenzyl disulfide (**9**)

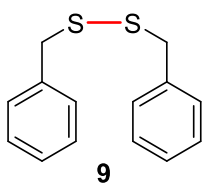

**9**<sup>71</sup> was purified by flash column chromatography (ethyl acetate/hexane = 1:40 to 1:20) as a light-yellow oil (123 mg, 50%) following the deprotection of **3ad** (1 mmol). <sup>1</sup>H-NMR (400 MHz, CDCl<sub>3</sub>)  $\delta$ : 7.24–7.11 (m, 10H), 3.49 (s, 4H). <sup>13</sup>C-NMR (100 MHz, CDCl<sub>3</sub>)  $\delta$ : 137.5, 129.5, 128.6, 127.5, 43.3. IR 3024.6, 2918.8, 1594.9, 1488.0, 1449.7, 1407.6, 1222.8, 1192.7, 1066.2, 1023.4, 758.7, 465.1 cm<sup>-1</sup>; HRMS (ESI<sup>+</sup>) (m/z) calcd.

for C<sub>14</sub>H<sub>15</sub>S<sub>2</sub> [M+H]<sup>+</sup> 247.0610; found 247.0604.

### Bis(2-hydroxyphenyl) disulfide (**10**)

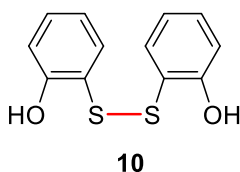

**10**<sup>72</sup> was purified by flash column chromatography (ethyl acetate/hexane = 1:5 to 1:1) as a light-yellow oil (173 mg, 69%) following the deprotection of **3ar** (1 mmol). <sup>1</sup>H-NMR (400 MHz, CDCl<sub>3</sub>)  $\delta$ : 7.37–7.32 (m, 2H), 7.22 (dd,  $J$  = 7.8, 1.7 Hz, 2H), 7.00 (dd,  $J$  = 8.2, 1.3 Hz, 2H), 6.81 (td,  $J$  = 7.6, 1.3 Hz, 2H), 6.29 (s, 2H). <sup>13</sup>C-NMR (100 MHz, CDCl<sub>3</sub>)  $\delta$ : 157.0, 136.3, 133.3, 121.2, 120.1, 115.9. IR 3449.7, 3399.5,

1566.5, 1459.4, 1331.8, 1291.5, 1236.4, 1174.4, 1021.1, 829.1, 749.4, 496.4, 428.1 cm<sup>-1</sup>; HRMS (ESI<sup>+</sup>) (m/z) calcd. for C<sub>12</sub>H<sub>11</sub>O<sub>2</sub>S<sub>2</sub> [M+H]<sup>+</sup> 251.0195; found 251.0189.

### Bis(2-aminophenyl) disulfide (**11**)

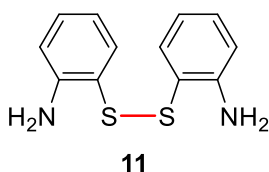

**11**<sup>71</sup> was purified by flash column chromatography (ethyl acetate/hexane = 1:5 to 1:1) as a light-yellow oil (109 mg, 44%) following the deprotection of **3as** (1 mmol). <sup>1</sup>H-NMR (400 MHz, CDCl<sub>3</sub>)  $\delta$ : 7.18–7.13 (m, 4H), 6.70 (dd,  $J$  = 8.4, 1.2 Hz, 2H), 6.57 (td,  $J$  = 7.4, 1.3 Hz, 2H), 4.22 (s, 4H). <sup>13</sup>C-NMR (100 MHz, CDCl<sub>3</sub>)  $\delta$ : 148.8, 137.0, 131.7, 118.9, 118.4, 115.4. IR 3375.1, 3061.7, 1611.8, 1580.3,

1468.2, 1441.1, 1299.5, 1242.9, 1151.1, 1020.8, 856.4, 745.5, 451.8 cm<sup>-1</sup>; HRMS (ESI<sup>+</sup>) (m/z) calcd. for C<sub>12</sub>H<sub>13</sub>N<sub>2</sub>S<sub>2</sub> [M+H]<sup>+</sup> 249.0515; found 249.0525.

### Dimethyl disulfide (**12**)

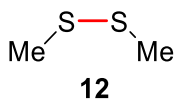

Compound **12** was too volatile to be isolated, so the reaction mixture of **5j** was passed through millipore filter (0.45  $\mu$ m) directly after 10 min and analyzed by GC-MS directly.



Mass spectrum and retrieval results were listed below respectively, and compound **12** ( $m/z = 94.0$ ) was identified as dimethyl disulfide.

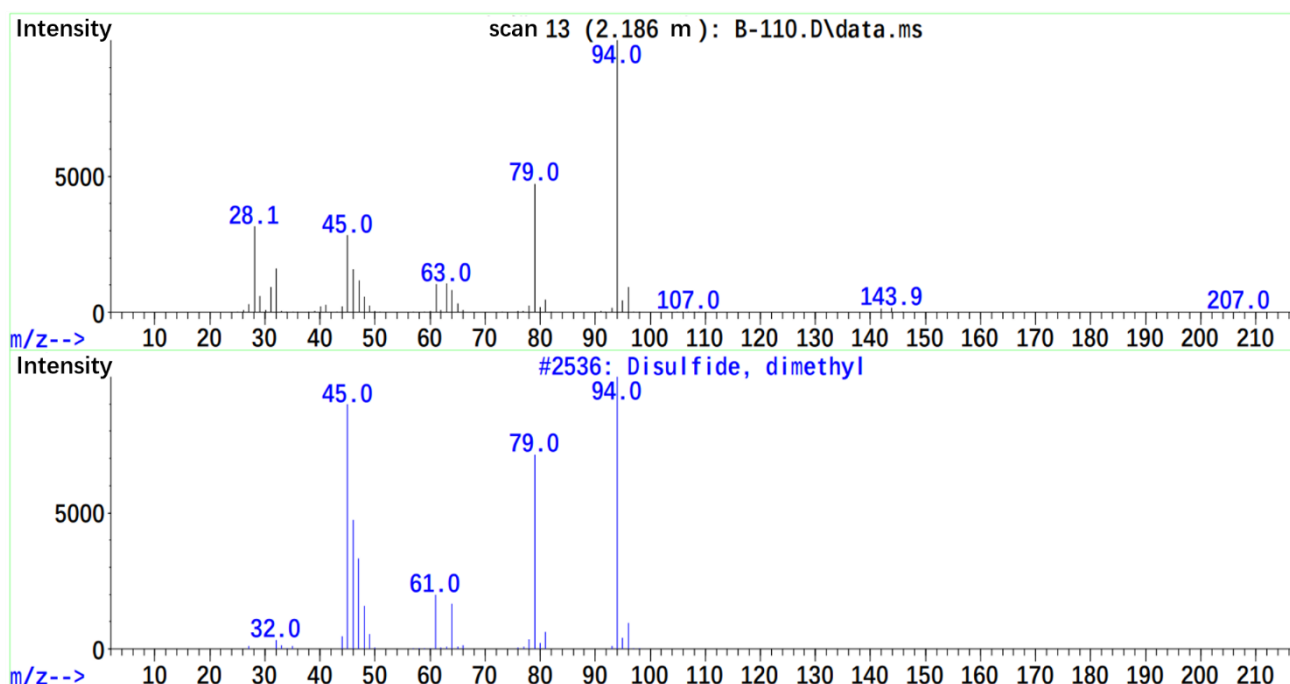

## 11. Green chemistry metrics analysis.

### E-Factor for **3a** and **3p** using $\text{H}_2\text{O}_2/\text{CeBr}_3$ :

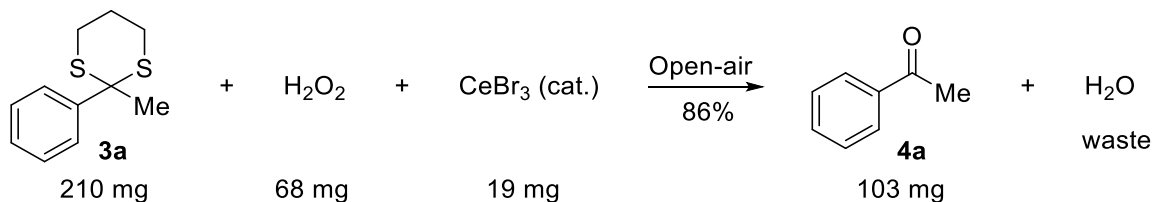

Total amount of reactants: 210 mg + 68 mg + 19 mg = 297 mg

Amount of final product: 103 mg

Amount of waste: 297 mg – 103 mg = 194 mg

E-Factor = Amount of waste/Amount of product = 194/103 = 1.88

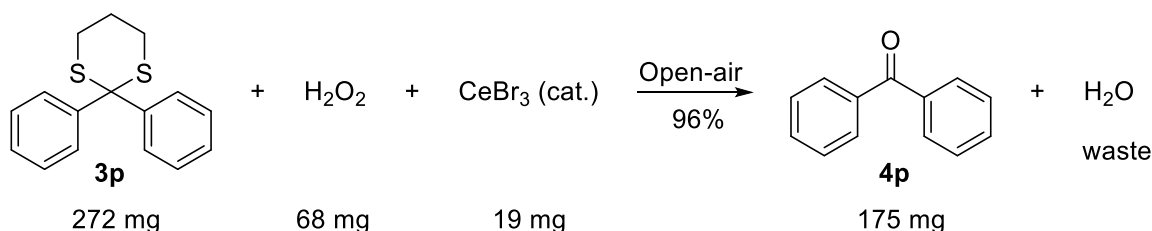

Total amount of reactants: 272 mg + 68 mg + 19 mg = 359 mg

Amount of final product: 175 mg

Amount of waste: 359 mg – 175 mg = 184 mg

E-Factor = Amount of waste/Amount of product = 184/175 = 1.05

**AE for 3a and 3p using H<sub>2</sub>O<sub>2</sub>/CeBr<sub>3</sub>:**

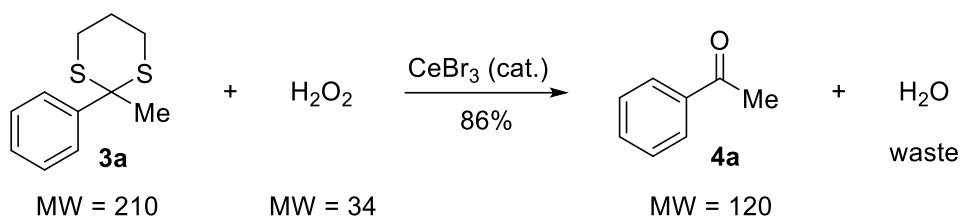

Molecular weight of product: 120

Sum of molecular weight of reagent: 210 + 34 = 244

Atom economy = Molecular weight of product/Sum of molecular weight of reagent = 120/244 = 49.2%

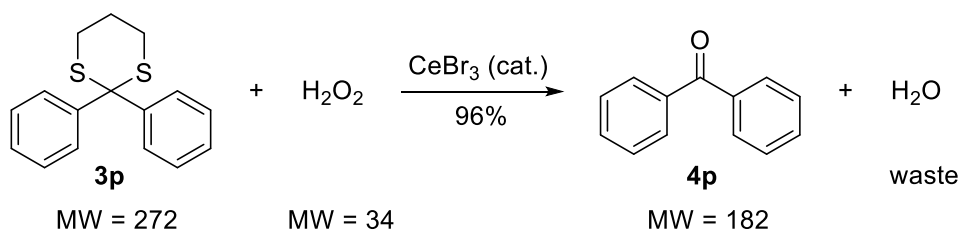

Molecular weight of product: 182

Sum of molecular weight of reagent: 272 + 34 = 306

Atom economy = Molecular weight of product/Sum of molecular weight of reagent = 182/306 = 59.5%

**RME for 3a and 3p using H<sub>2</sub>O<sub>2</sub>/CeBr<sub>3</sub>:**

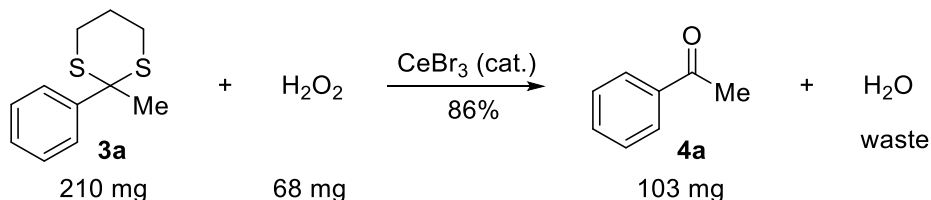

Mass of product: 103 mg

Total mass of reagent: 210 mg + 68 mg = 278 mg

RME = Mass of product/Total mass of reagent = 103/278 = 37.1%

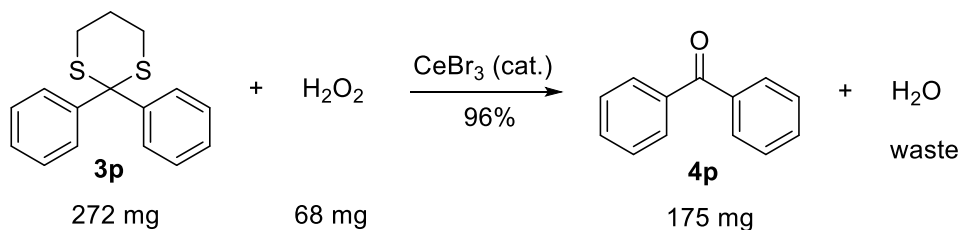

Mass of product: 175 mg

Total mass of reagent: 272 mg + 68 mg = 340 mg

RME = Mass of product/Total mass of reagent = 175/340 = 51.5%

### PMI for **3a** and **3p** using H<sub>2</sub>O<sub>2</sub>/CeBr<sub>3</sub>:

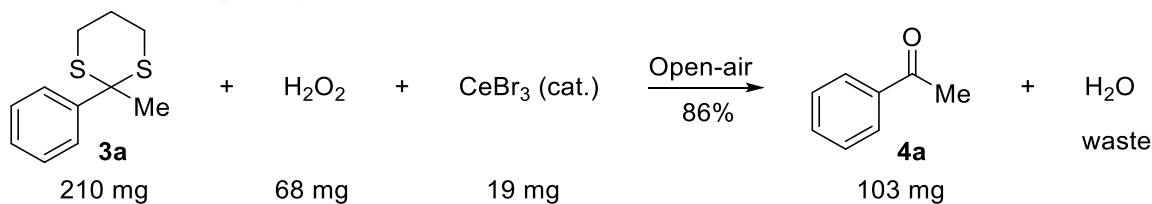

Total mass in process: 210 mg + 68 mg + 19 mg = 297 mg

Mass of product: 103 mg

PMI = Total mass in process/Mass of product = 297/103 = 2.88

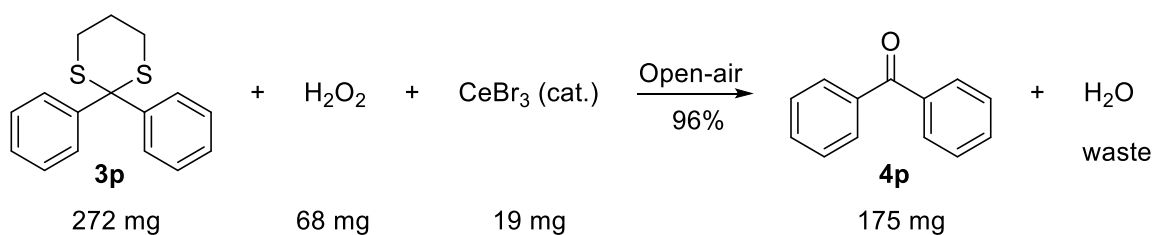

Total mass in process: 272 mg + 68 mg + 19 mg = 359 mg

Mass of product: 175 mg

PMI = Total mass in process/Mass of product = 359/175 = 2.05

Green chemistry metrics for **3a** and **3p** using other protocols (SDS-I<sub>2</sub>/H<sub>2</sub>O<sub>2</sub><sup>73</sup>, TBHP<sup>74</sup>, NBS<sup>75</sup>, IBX<sup>76</sup>, DDQ<sup>77</sup> and Oxone<sup>78</sup>) were calculated according to the published literatures, and the results were listed below:

| Reagent  | Average           |       |       |       |       |       |                                                    | 3p                |       |       |       |       |                                                    |
|----------|-------------------|-------|-------|-------|-------|-------|----------------------------------------------------|-------------------|-------|-------|-------|-------|----------------------------------------------------|
|          | CeBr <sub>3</sub> | IBX   | DDQ   | TBHP  | NBS   | Oxone | SDS, I <sub>2</sub> /H <sub>2</sub> O <sub>2</sub> | CeBr <sub>3</sub> | IBX   | DDQ   | TBHP  | NBS   | SDS, I <sub>2</sub> /H <sub>2</sub> O <sub>2</sub> |
| E-Factor | 1.47              | 3.90  | 4.11  | 2.16  | 2.65  | 14.2  | 2.05                                               | 1.05              | 3.09  | 3.11  | 1.70  | 2.07  | 1.63                                               |
| AE       | 54.4%             | 28.8% | 32.0% | 45.2% | 35.7% | 23.2% | 54.4%                                              | 59.5%             | 33.0% | 36.5% | 50.3% | 40.5% | 59.5%                                              |
| RME      | 44.3%             | 21.0% | 20.4% | 32.4% | 28.2% | 6.6%  | 39.7%                                              | 51.5%             | 24.5% | 24.4% | 37.0% | 32.6% | 44.6%                                              |
| PMI      | 2.47              | 4.90  | 5.11  | 3.16  | 3.65  | 15.2  | 3.05                                               | 2.05              | 4.09  | 4.11  | 2.70  | 3.07  | 2.63                                               |

  

| Reagent  | 3a                |       |       |       |       |       |                                                    |
|----------|-------------------|-------|-------|-------|-------|-------|----------------------------------------------------|
|          | CeBr <sub>3</sub> | IBX   | DDQ   | TBHP  | NBS   | Oxone | SDS, I <sub>2</sub> /H <sub>2</sub> O <sub>2</sub> |
| E-Factor | 1.88              | 4.70  | 5.11  | 2.61  | 3.22  | 14.2  | 2.47                                               |
| AE       | 49.2%             | 24.5% | 27.5% | 40.0% | 30.9% | 23.2% | 49.2%                                              |
| RME      | 37.1%             | 17.5% | 16.4% | 27.7% | 23.7% | 6.6%  | 34.70%                                             |
| PMI      | 2.88              | 5.70  | 6.11  | 3.61  | 4.22  | 15.2  | 3.47                                               |

## 12. References:

1. K. Xu, D. Luan, X. Wang, B. Hu, X. Liu, F. Kong and B. Tang, *Angew. Chem., Int. Ed.*, 2016, **55**, 12751-12754.
2. B. M. Lamb and C. F. Barbas lii, *Chem. Commun.*, 2015, **51**, 3196-3199.
3. S. K. De, *Adv. Synth. Catal.*, 2005, **347**, 673-676.
4. G. Bez and D. Gogoi, *Tetrahedron Lett.*, 2006, **47**, 5155-5157.
5. L. Liu, G. Wang, J. Jiao and P. Li, *Org. Lett.*, 2017, **19**, 6132-6135.
6. R. B. Kothapalli, R. Niddana and R. Balamurugan, *Org. Lett.*, 2014, **16**, 1278-1281.
7. N. Jung, S. Grässle, D. S. Lütjohann and S. Bräse, *Org. Lett.*, 2014, **16**, 1036-1039.
8. G. Zhao, L.-Z. Yuan, M. Alami and O. Provot, *Adv. Synth. Catal.*, 2018, **360**, 2522-2536.
9. N. C. Ganguly and P. Mondal, *Synth. Commun.*, 2011, **41**, 2374-2384.
10. B. Yucel and P. J. Walsh, *Adv. Synth. Catal.*, 2014, **356**, 3659-3667.

11. Z. Xing, M. Yang, H. Sun, Z. Wang, P. Chen, L. Liu, X. Wang, X. Xie and X. She, *Green Chem.*, 2018, **20**, 5117-5122.
12. K. Nozawa-Kumada, S. Ito, K. Noguchi, M. Shigeno and Y. Kondo, *Chem. Commun.*, 2019, **55**, 12968-12971.
13. Y.-C. Liu, D. M. Reddy, X.-A. Chen, Y.-C. Shieh and C.-F. Lee, *Eur. J. Org. Chem.*, 2020, **2020**, 2542-2552.
14. T. Benneche, P. Strande, R. Oftebro and K. Undheim, *Eur. J. Med. Chem.*, 1993, **28**, 463-472.
15. T. Ohgi, Y. Masutomi, K. Ishiyama, H. Kitagawa, Y. Shiba and J. Yano, *Org. Lett.*, 2005, **7**, 3477-3480.
16. I. P. Sánchez and E. Turos, *Tetrahedron: Asymmetr.*, 2009, **20**, 1646-1660.
17. T. Aoyama, T. Suzuki, T. Nagaoka, T. Takido and M. Kodomari, *Synth. Commun.*, 2013, **43**, 553-566.
18. M. Krumb, L. M. Kammer, R. Forster, C. Grundke and T. Opatz, *ChemPhotoChem*, 2020, **4**, 101-104.
19. S. C. Sondej and J. A. Katzenellenbogen, *J. Org. Chem.*, 1986, **51**, 3508-3513.
20. B. Akhlaghinia and A. Makarem, *J. Sulfur Chem.*, 2011, **32**, 575-581.
21. N. Hazarika, B. Sarmah, M. Bordoloi, P. Phukan and G. Baishya, *Org. Biomol. Chem.*, 2017, **15**, 2003-2012.
22. Y. Gao, T. Ma, Z. Ou, W. Cai, G. Yang, Y. Li, M. Xu and Q. Li, *Talanta*, 2018, **178**, 663-669.
23. C. Yu, K. Lee, Y. You and E. J. Cho, *Adv. Synth. Catal.*, 2013, **355**, 1471-1476.
24. C. Saiz, P. Wipf, E. Manta and G. Mahler, *Org. Lett.*, 2009, **11**, 3170-3173.
25. K. Suzuki, J. Inanaga and M. Yamaguchi, *Chem. Lett.*, 1979, **8**, 1277-1278.
26. T. A. Mitchell and J. W. Bode, *J. Am. Chem. Soc.*, 2009, **131**, 18057-18059.
27. H. Niwa and Y. Miyachi, *Bull. Chem. Soc. Jpn.*, 1991, **64**, 716-718.
28. X. Zhu, Y. Liu, C. Liu, H. Yang and H. Fu, *Green Chem.*, 2020, **22**, 4357-4363.
29. Q. Yao, W. Liu, P. Liu, L. Ren, X. Fang and C.-J. Li, *Eur. J. Org. Chem.*, 2019, **2019**, 2721-2724.
30. G. Zhang, X. Xie, Y. Wang, X. Wen, Y. Zhao and C. Ding, *Org. Biomol. Chem.*, 2013, **11**, 2947-2950.
31. T. Niu, S. Chen, M. Hong, T. Zhang, J. Chen, X. Dong and B. Ni, *Green Chem.*, 2020, **22**, 5042-5049.
32. X. Qi, H.-P. Li, J.-B. Peng and X.-F. Wu, *Tetrahedron Lett.*, 2017, **58**, 3851-3853.
33. X. Jiang, J.-M. Wang, Y. Zhang, Z. Chen, Y.-M. Zhu and S.-J. Ji, *Org. Lett.*, 2014, **16**, 3492-3495.
34. S. Chelli, K. Troshin, P. Mayer, S. Lakhdar, A. R. Ofial and H. Mayr, *J. Am. Chem. Soc.*, 2016, **138**, 10304-10313.
35. J. Zhang, Y. Xiao, K. Chen, W. Wu, H. Jiang and S. Zhu, *Adv. Synth. Catal.*, 2016, **358**, 2684-2691.
36. D. Shen, C. Miao, S. Wang, C. Xia and W. Sun, *Org. Lett.*, 2014, **16**, 1108-1111.
37. X. Zhu, C. Liu, Y. Liu, H. Yang and H. Fu, *Chem. Commun.*, 2020, **56**, 12443-12446.
38. X. Wang, C. Wang, Y. Liu and J. Xiao, *Green Chem.*, 2016, **18**, 4605-4610.
39. R. Lin, F. Chen and N. Jiao, *Org. Lett.*, 2012, **14**, 4158-4161.
40. F. Liang, K. Eda, T. Okazoe, A. Wada, N. Mori, K. Konishi and A. Tsuda, *J. Org. Chem.*, 2021, **86**, 6504-6517.
41. E. Ota, H. Wang, N. L. Frye and R. R. Knowles, *J. Am. Chem. Soc.*, 2019, **141**, 1457-1462.
42. Z. Li, W. Sun, X. Wang, L. Li, Y. Zhang and C. Li, *J. Am. Chem. Soc.*, 2021, **143**, 3536-3543.
43. G. R. Pettit, B. R. Moser, R. F. Mendonça, J. C. Knight and F. Hogan, *J. Nat. Prod.*, 2012, **75**, 1063-1069.
44. P. Thapa, S. Hazoor, B. Chouhan, T. T. Vuong and F. W. Foss, *J. Org. Chem.*, 2020, **85**, 9096-9105.
45. A. Szelwicka, A. Kolanowska, P. Latos, S. Jurczyk, S. Boncel and A. Chrobok, *Catal. Sci. Technol.*, 2020, **10**, 3255-3264.
46. S. Xiao, C. Liu, B. Song, L. Wang, Y. Qi and Y. Liu, *Chem. Commun.*, 2021, **57**, 6169-6172.
47. T. Scheidt, H. Land, M. Anderson, Y. Chen, P. Berglund, D. Yi and W.-D. Fessner, *Adv. Synth. Catal.*, 2015, **357**, 1721-1731.
48. K. Moriyama, M. Takemura and H. Togo, *J. Org. Chem.*, 2014, **79**, 6094-6104.
49. N. Luo, Y. Zhong, H. Wen, H. Shui and R. Luo, *Eur. J. Org. Chem.*, 2021, **2021**, 1355-1364.
50. Y. Liu, A. Xie, J. Li, X. Xu, W. Dong and B. Wang, *Tetrahedron*, 2014, **70**, 9791-9796.
51. Z. Liu, Z. Yang, B. Yu, X. Yu, H. Zhang, Y. Zhao, P. Yang and Z. Liu, *Org. Lett.*, 2018, **20**, 5130-5134.

52. D. S. G. Henriques, K. Zimmer, S. Klare, A. Meyer, E. Rojo-Wiechel, M. Bauer, R. Sure, S. Grimme, O. Schiemann, R. A. Flowers II and A. Gansäuer, *Angew. Chem., Int. Ed.*, 2016, **55**, 7671-7675.
53. K. Walsh, H. F. Sneddon and C. J. Moody, *Tetrahedron*, 2014, **70**, 7380-7387.
54. H. Huang and T. H. Lambert, *Angew. Chem., Int. Ed.*, 2021, **60**, 11163-11167.
55. T. Mandal, S. Jana and J. Dash, *Eur. J. Org. Chem.*, 2017, **2017**, 4972-4983.
56. G. Hamasaka, H. Tsuji and Y. Uozumi, *Synlett*, 2015, **26**, 2037-2041.
57. R. R. Behera, R. Ghosh, S. Panda, S. Khamari and B. Bagh, *Org. Lett.*, 2020, **22**, 3642-3648.
58. A. P. Ingale, S. V. Shinde and N. M. Thorat, *Synth. Commun.*, 2021, **51**, 2528-2543.
59. S. Kramer, *Org. Lett.*, 2019, **21**, 65-69.
60. N. N. H. Ton, B. K. Mai and T. V. Nguyen, *J. Org. Chem.*, 2021, **86**, 9117-9133.
61. L. Wang and T. Liu, *Tetrahedron Lett.*, 2019, **60**, 150993.
62. H. Seo and T. F. Jamison, *Org. Lett.*, 2019, **21**, 10159-10163.
63. J. Wu, R. M. Bär, L. Guo, A. Noble and V. K. Aggarwal, *Angew. Chem., Int. Ed.*, 2019, **58**, 18830-18834.
64. D. K. Ahn, Y. W. Kang and S. K. Woo, *J. Org. Chem.*, 2019, **84**, 3612-3623.
65. S. Meng, W. Zhong, W. Yao and Z. Li, *Org. Lett.*, 2020, **22**, 2981-2986.
66. B. M. Fraga, C. E. Díaz, P. Bolaños, M. Bailén, M. F. Andrés and A. González-Coloma, *Phytochemistry*, 2020, **176**, 112398.
67. Z. Gao and S. P. Fletcher, *Chem. Commun.*, 2017, **53**, 10216-10219.
68. M. R. Friedfeld, G. W. Margulieux, B. A. Schaefer and P. J. Chirik, *J. Am. Chem. Soc.*, 2014, **136**, 13178-13181.
69. O. O. Kovalenko and H. Adolfsson, *Chem.-Eur. J.*, 2015, **21**, 2785-2788.
70. S. U. Sonavane, M. Chidambaram, S. Khalil, J. Almog and Y. Sasson, *Tetrahedron Lett.*, 2008, **49**, 520-522.
71. L. Song, W. Li, W. Duan, J. An, S. Tang, L. Li and G. Yang, *Green Chem.*, 2019, **21**, 1432-1438.
72. H. Richter, S. Beckendorf and O. G. Mancheño, *Adv. Synth. Catal.*, 2011, **353**, 295-302.
73. N. C. Ganguly and S. K. Barik, *Synthesis*, 2009, 1393-1399.
74. N. B. Barhate, P. D. Shinde, V. A. Mahajan and R. D. Wakharkar, *Tetrahedron Lett.*, 2002, **43**, 6031-6033.
75. H. R. Shaterian and H. Hadadzadeh, *Phosphorus Sulfur*, 2006, **181**, 1059-1071.
76. Y. Wu, X. Shen, J.-H. Huang, C.-J. Tang, H.-H. Liu and Q. Hu, *Tetrahedron Lett.*, 2002, **43**, 6443-6445.
77. K. Tanemura, H. Dohya, M. Imamura, T. Suzuki and T. Horaguchi, *J. Chem. Soc., Perkin Trans. 1*, 1996, 453-457.
78. P. Ceccherelli, M. Curini, M. C. Marcotullio, F. Epifano and O. Rosati, *Synlett*, 1996, 767-768.

7.9729  
7.9527  
7.9099  
7.8900  
7.6184  
7.6070  
7.5964  
7.5863  
7.5766  
7.5735  
7.4320  
7.4206  
7.3318  
7.3126  
7.2938  
7.2817  
7.2399  
7.2195  
7.0032  
6.9844  
6.9657

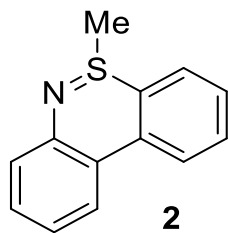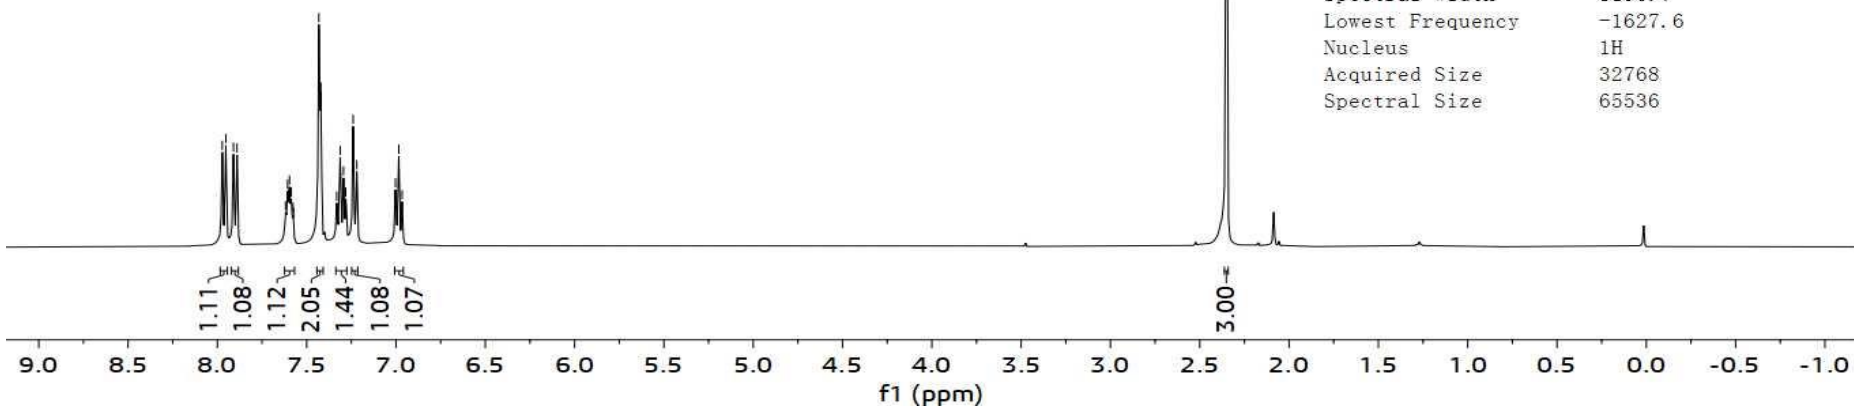

— 2.3502

|                        |                     |
|------------------------|---------------------|
| Title                  | wyx-S=N.1.fid       |
| Origin                 | Bruker BioSpin GmbH |
| Owner                  | nmsu                |
| Spectrometer           | Avance NEO          |
| Solvent                | CDCl3               |
| Temperature            | 295.2               |
| Pulse Sequence         | zg30                |
| Experiment             | 1D                  |
| Number of Scans        | 16                  |
| Receiver Gain          | 101                 |
| Relaxation Delay       | 1.0000              |
| Pulse Width            | 8.0000              |
| Acquisition Time       | 3.9977              |
| Acquisition Date       | 2021-12-01T15:53:38 |
| Modification Date      | 2021-12-01T15:53:39 |
| Spectrometer Frequency | 400.13              |
| Spectral Width         | 8196.7              |
| Lowest Frequency       | -1627.6             |
| Nucleus                | 1H                  |
| Acquired Size          | 32768               |
| Spectral Size          | 65536               |

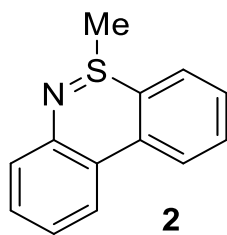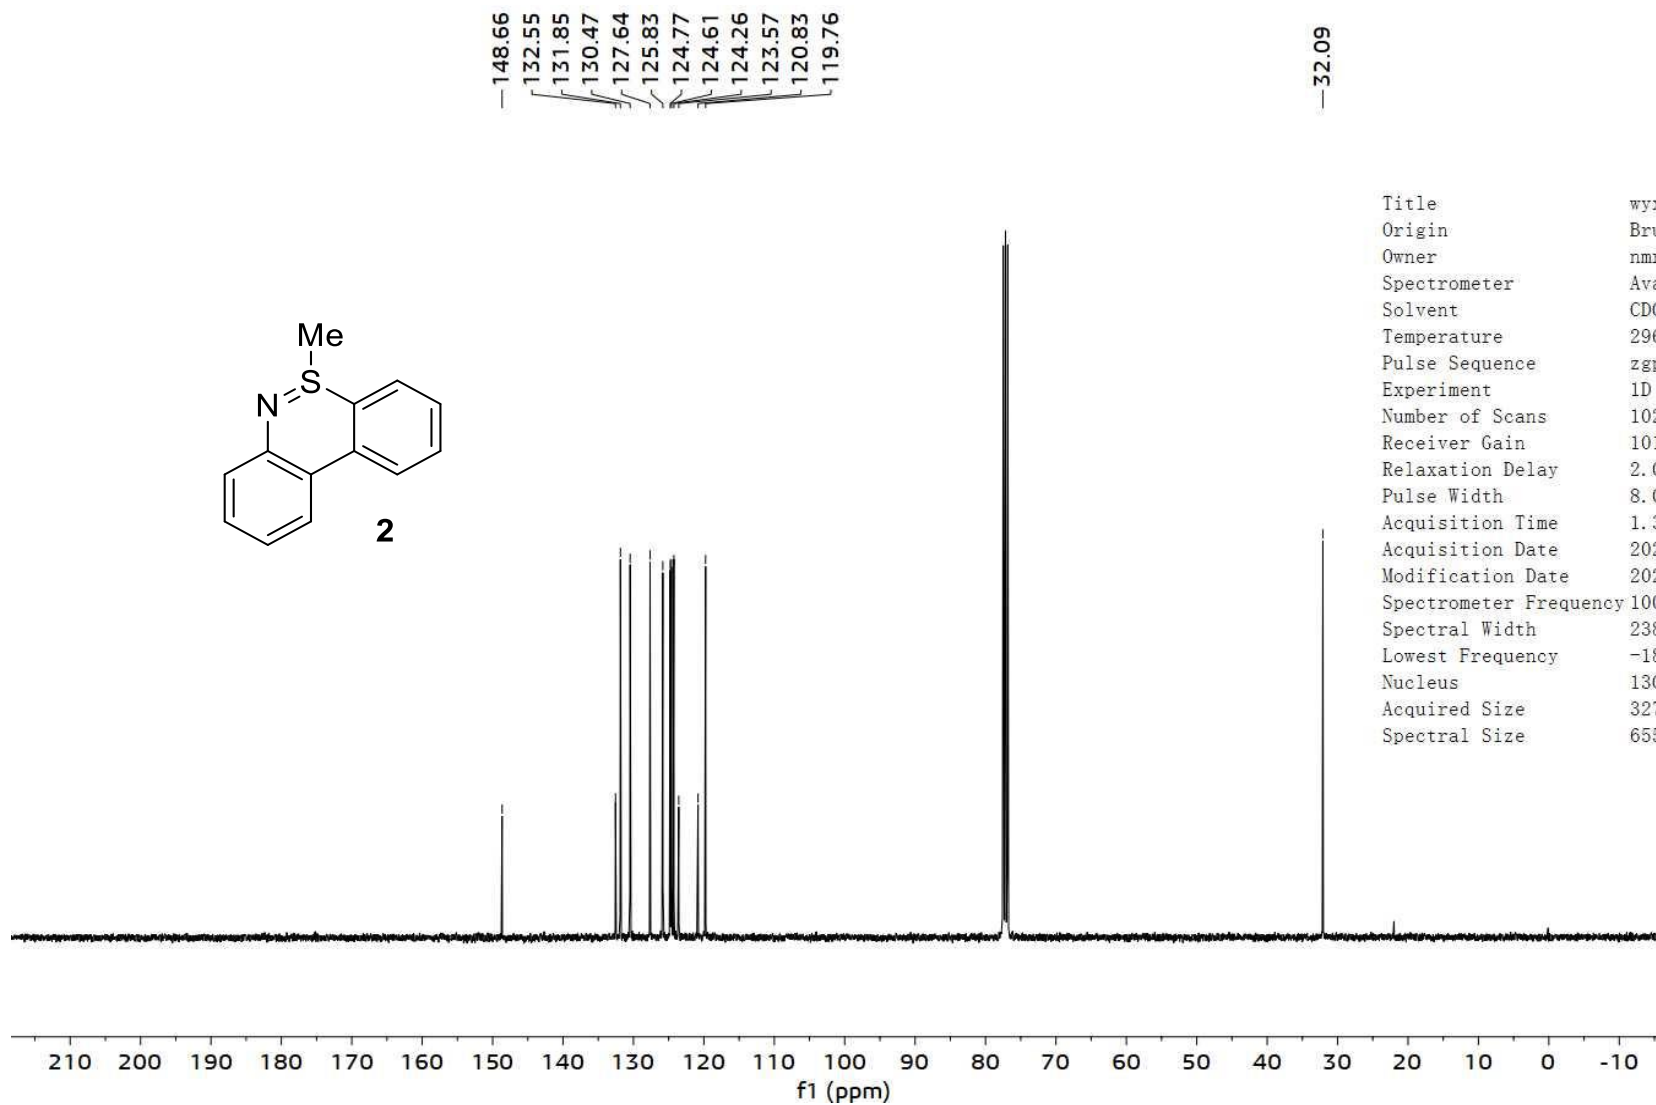

|                        |                     |
|------------------------|---------------------|
| Title                  | wyx-S=N. 2. fid     |
| Origin                 | Bruker BioSpin GmbH |
| Owner                  | nmrsu               |
| Spectrometer           | Avance NEO          |
| Solvent                | CDC13               |
| Temperature            | 296.2               |
| Pulse Sequence         | zgpg30              |
| Experiment             | 1D                  |
| Number of Scans        | 1024                |
| Receiver Gain          | 101                 |
| Relaxation Delay       | 2.0000              |
| Pulse Width            | 8.0000              |
| Acquisition Time       | 1.3763              |
| Acquisition Date       | 2021-12-01T16:52:50 |
| Modification Date      | 2021-12-01T16:52:51 |
| Spectrometer Frequency | 100.62              |
| Spectral Width         | 23809.5             |
| Lowest Frequency       | -1835.7             |
| Nucleus                | 13C                 |
| Acquired Size          | 32768               |
| Spectral Size          | 65536               |

7.9439  
7.9403  
7.9353  
7.9272  
7.9253  
7.9221  
7.9193  
7.9145  
7.3792  
7.3745  
7.3694  
7.3559  
7.3521  
7.3401  
7.3359  
7.3304  
7.2575  
7.2545  
7.2514  
7.2405  
7.2364  
7.2315  
7.2210  
7.2179  
7.2149

2.7164  
2.7118  
2.7048  
2.6944  
2.6911  
2.6800  
1.9467  
1.9439  
1.9318  
1.9269  
1.9173  
1.9042  
1.8901  
1.8871  
1.7790

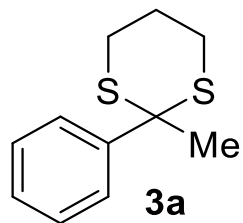

|                        |                     |
|------------------------|---------------------|
| Title                  | WYX-2-YL. 1. fid    |
| Origin                 | Bruker BioSpin GmbH |
| Owner                  | nmrsu               |
| Spectrometer           | spect               |
| Solvent                | CDC13               |
| Temperature            | 298.0               |
| Pulse Sequence         | zg30                |
| Experiment             | 1D                  |
| Number of Scans        | 16                  |
| Receiver Gain          | 11                  |
| Relaxation Delay       | 1.0000              |
| Pulse Width            | 9.7800              |
| Acquisition Time       | 4.0894              |
| Acquisition Date       | 2021-10-18T17:29:55 |
| Modification Date      | 2021-10-18T17:29:54 |
| Spectrometer Frequency | 400.15              |
| Spectral Width         | 8012.8              |
| Lowest Frequency       | -1554.0             |
| Nucleus                | <sup>1</sup> H      |
| Acquired Size          | 32768               |
| Spectral Size          | 65536               |

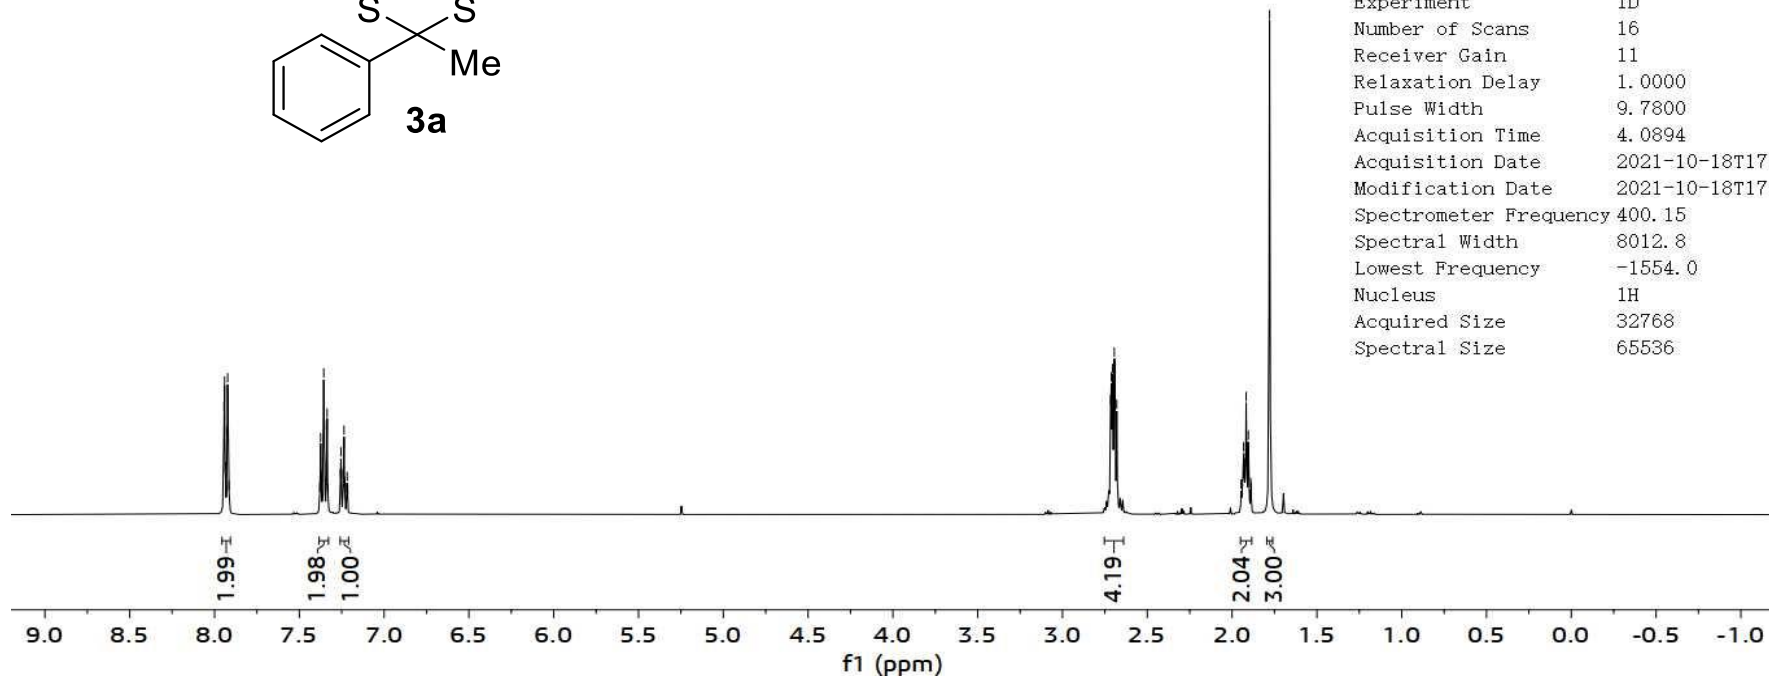



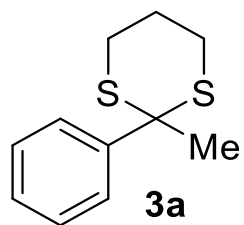

—143.78

128.51  
127.72  
127.02

—53.93

—32.76  
—28.05  
—24.64

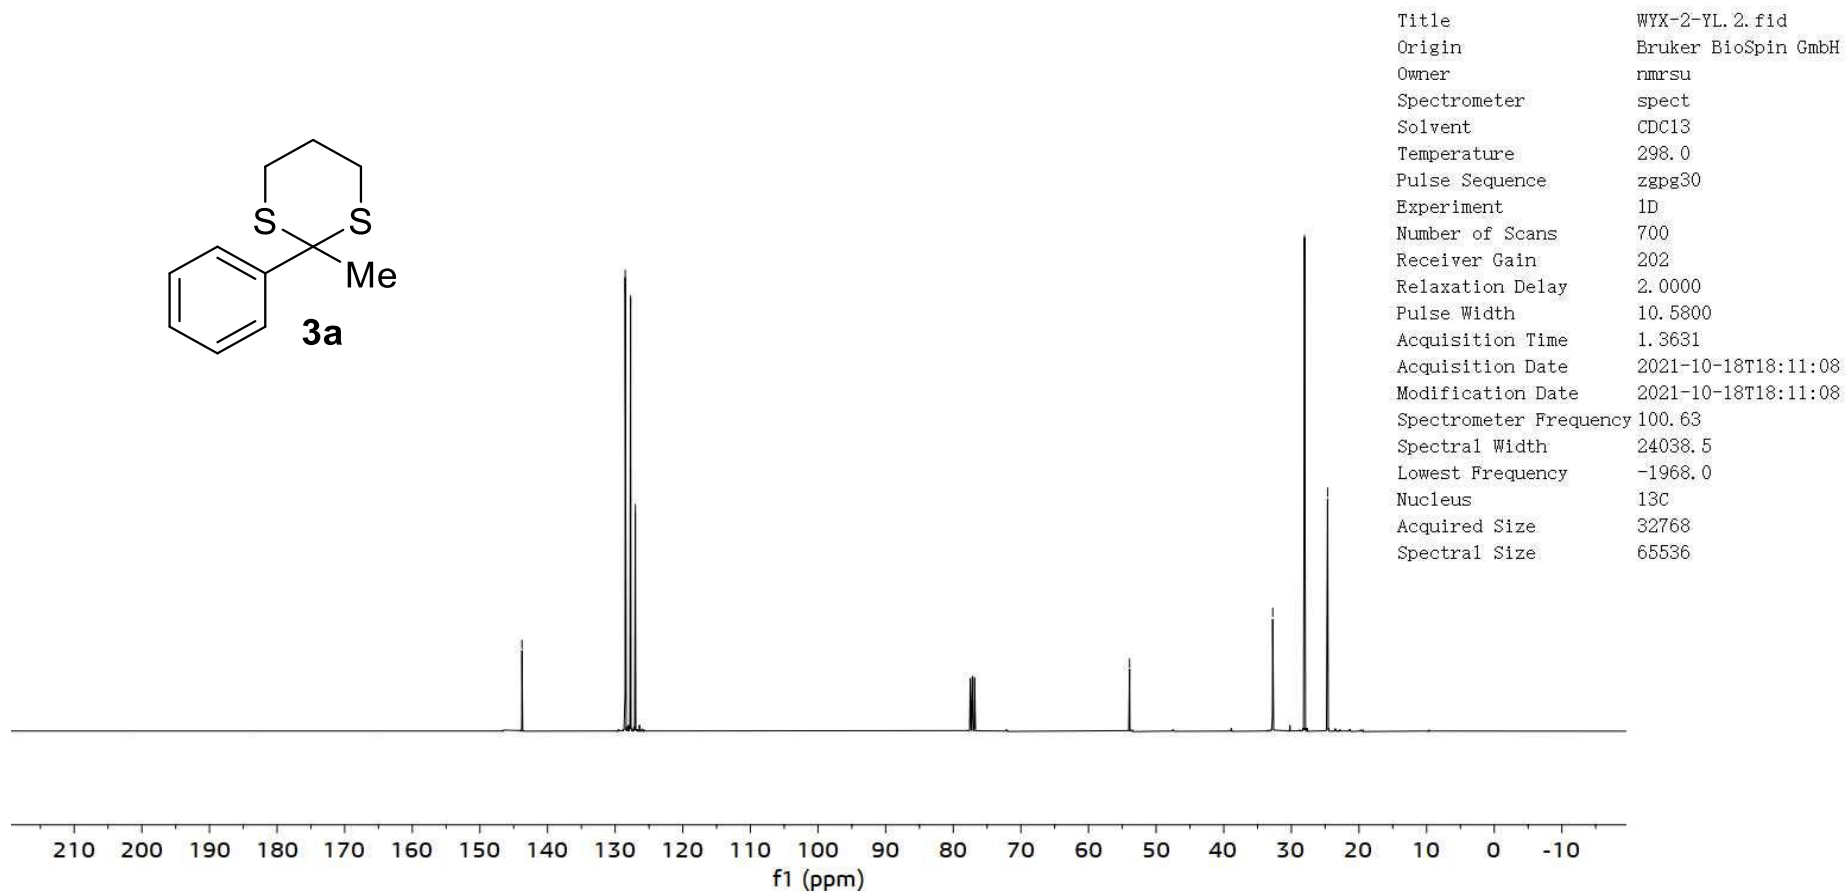

|                        |                     |
|------------------------|---------------------|
| Title                  | WYX-2-YL. 2. fid    |
| Origin                 | Bruker BioSpin GmbH |
| Owner                  | nmrsu               |
| Spectrometer           | spect               |
| Solvent                | CDC13               |
| Temperature            | 298.0               |
| Pulse Sequence         | zgpg30              |
| Experiment             | 1D                  |
| Number of Scans        | 700                 |
| Receiver Gain          | 202                 |
| Relaxation Delay       | 2.0000              |
| Pulse Width            | 10.5800             |
| Acquisition Time       | 1.3631              |
| Acquisition Date       | 2021-10-18T18:11:08 |
| Modification Date      | 2021-10-18T18:11:08 |
| Spectrometer Frequency | 100.63              |
| Spectral Width         | 24038.5             |
| Lowest Frequency       | -1968.0             |
| Nucleus                | 13C                 |
| Acquired Size          | 32768               |
| Spectral Size          | 65536               |

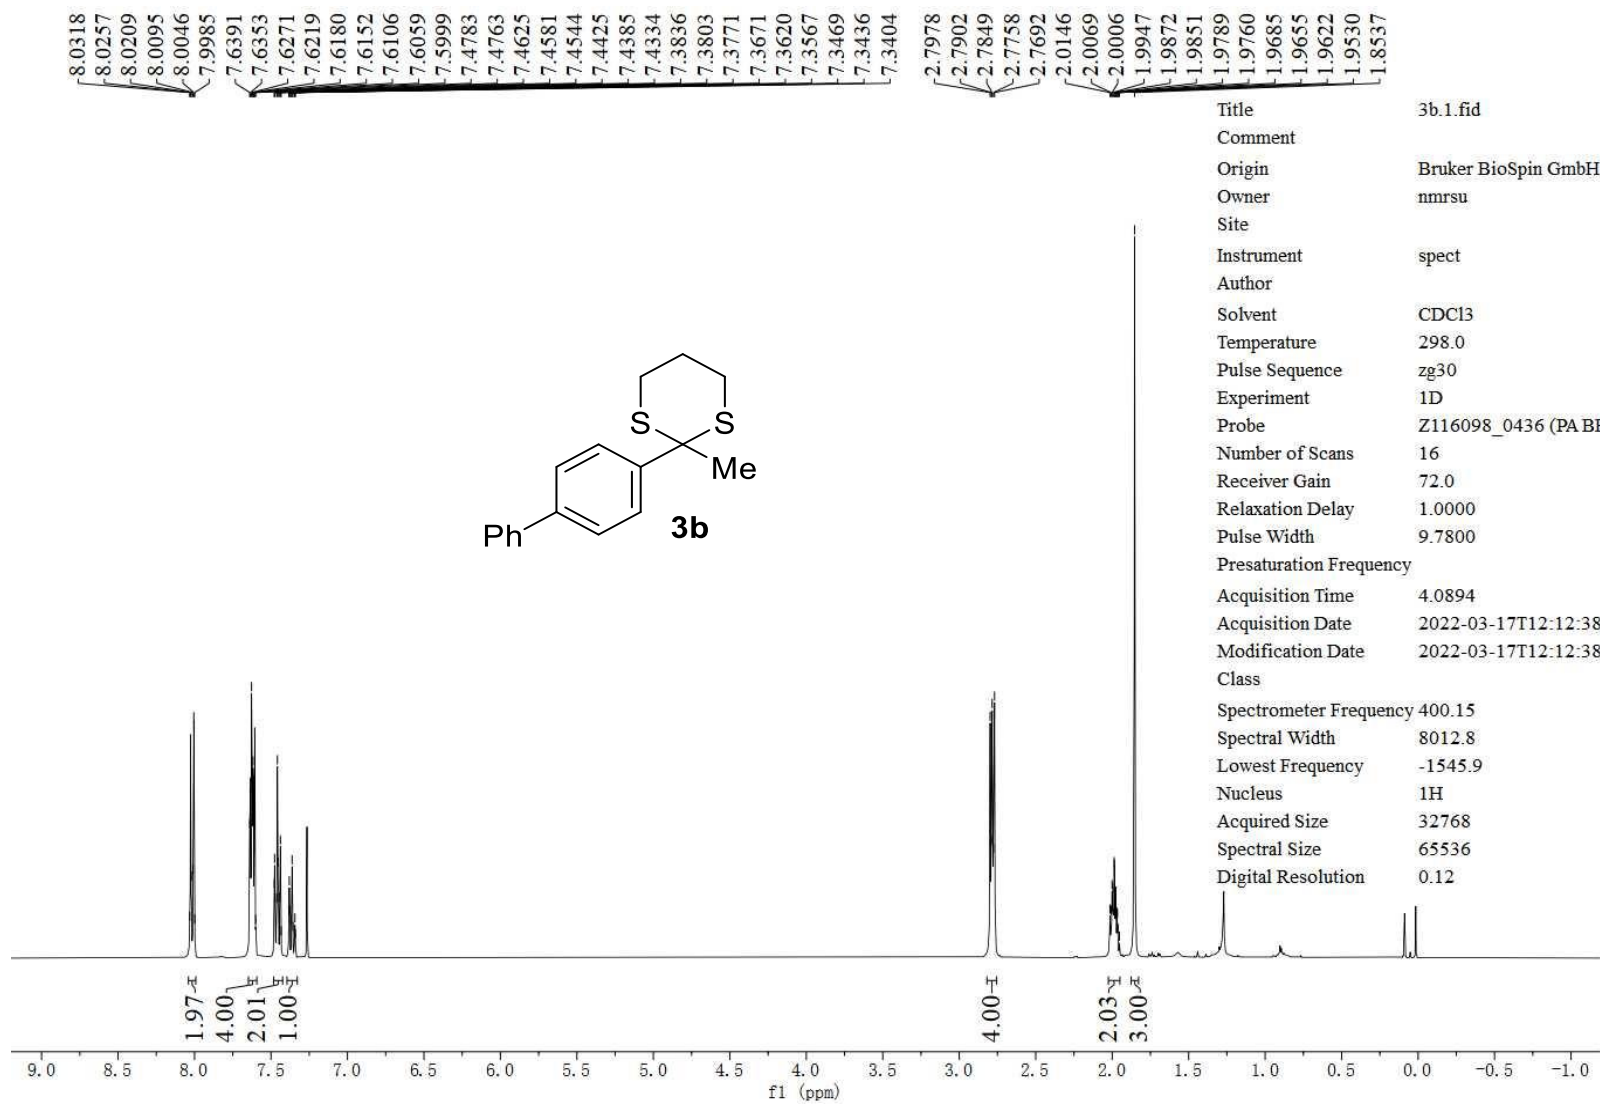

8.0318  
8.0257  
8.0209  
8.0095  
8.0046  
7.9985  
7.6391  
7.6353  
7.6271  
7.6219  
7.6180  
7.6152  
7.6106  
7.6059  
7.5999  
7.4783  
7.4763  
7.4625  
7.4581  
7.4544  
7.4425  
7.4385  
7.4334  
7.3836  
7.3803  
7.3771  
7.3671  
7.3620  
7.3567  
7.3469  
7.3436  
7.3404  
2.7978  
2.7902  
2.7849  
2.7758  
2.7692  
2.0146  
2.0069  
2.0006  
1.9947  
1.9872  
1.9851  
1.9789  
1.9760  
1.9685  
1.9655  
1.9622  
1.9530  
1.8537

|                         |                                             |
|-------------------------|---------------------------------------------|
| Title                   | 3b.1.fid                                    |
| Comment                 |                                             |
| Origin                  | Bruker BioSpin GmbH                         |
| Owner                   | nmrsu                                       |
| Site                    |                                             |
| Instrument              | spect                                       |
| Author                  |                                             |
| Solvent                 | CDCl <sub>3</sub>                           |
| Temperature             | 298.0                                       |
| Pulse Sequence          | zg30                                        |
| Experiment              | 1D                                          |
| Probe                   | Z116098_0436 (PA BBO 400S1 BBF-H-D-05 Z SP) |
| Number of Scans         | 16                                          |
| Receiver Gain           | 72.0                                        |
| Relaxation Delay        | 1.0000                                      |
| Pulse Width             | 9.7800                                      |
| Presaturation Frequency |                                             |
| Acquisition Time        | 4.0894                                      |
| Acquisition Date        | 2022-03-17T12:12:38                         |
| Modification Date       | 2022-03-17T12:12:38                         |
| Class                   |                                             |
| Spectrometer Frequency  | 400.15                                      |
| Spectral Width          | 8012.8                                      |
| Lowest Frequency        | -1545.9                                     |
| Nucleus                 | <sup>1</sup> H                              |
| Acquired Size           | 32768                                       |
| Spectral Size           | 65536                                       |
| Digital Resolution      | 0.12                                        |

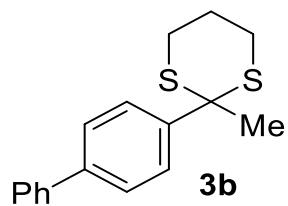

143.07  
140.66  
140.00  
128.90  
128.42  
127.48  
127.37  
127.18

53.93

32.89  
28.27  
24.81

|                        |                     |
|------------------------|---------------------|
| Title                  | WYX-9-YL. 3. fid    |
| Origin                 | Bruker BioSpin GmbH |
| Owner                  | nMrsu               |
| Spectrometer           | spect               |
| Solvent                | CDC13               |
| Temperature            | 298.0               |
| Pulse Sequence         | zgpg30              |
| Experiment             | 1D                  |
| Number of Scans        | 600                 |
| Receiver Gain          | 202                 |
| Relaxation Delay       | 2.0000              |
| Pulse Width            | 10.5800             |
| Acquisition Time       | 1.3631              |
| Acquisition Date       | 2021-10-16T02:00:49 |
| Modification Date      | 2021-10-16T02:00:50 |
| Spectrometer Frequency | 100.63              |
| Spectral Width         | 24038.5             |
| Lowest Frequency       | -1948.9             |
| Nucleus                | <sup>13</sup> C     |
| Acquired Size          | 32768               |
| Spectral Size          | 65536               |

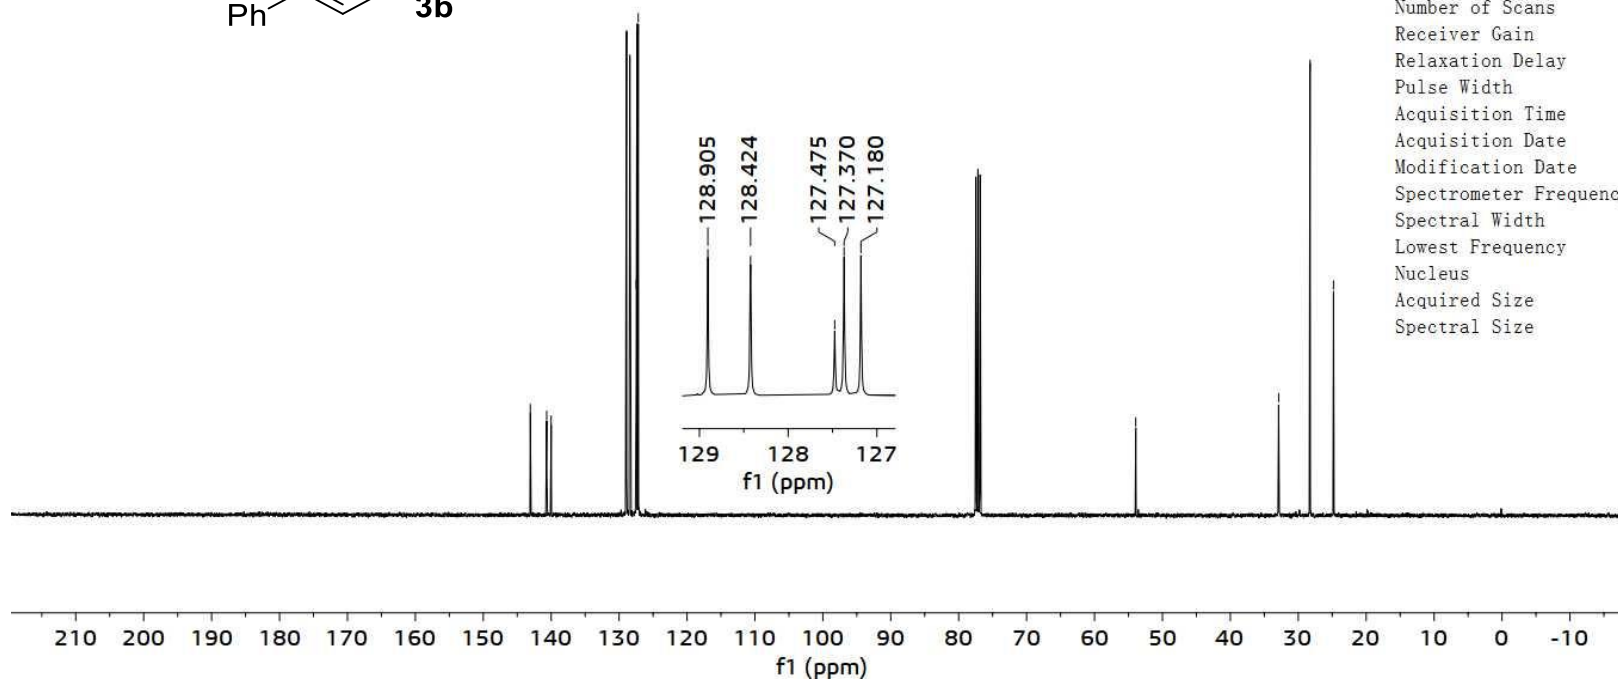

7.8536  
7.8482  
7.8369  
7.8314  
7.4618  
7.4563  
7.4395  
7.4144  
7.3970  
7.3779  
6.9953  
6.9871  
6.9817  
6.9702  
6.9646  
6.9566

— 5.0770

2.8053  
2.7938  
2.7794  
2.7698  
2.7588  
2.7440  
2.7282  
2.7078  
2.6927  
1.9852  
1.9709  
1.9570  
1.9430  
1.9422  
1.9280  
1.8146

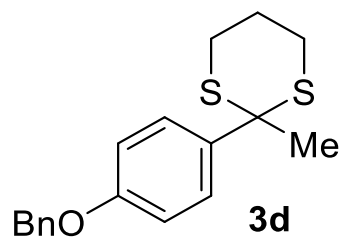

|                        |                      |
|------------------------|----------------------|
| Title                  | WYX-16-YL-dian.1.fid |
| Origin                 | Bruker BioSpin GmbH  |
| Owner                  | nmrsu                |
| Spectrometer           | spect                |
| Solvent                | CDC13                |
| Temperature            | 298.0                |
| Pulse Sequence         | zg30                 |
| Experiment             | 1D                   |
| Number of Scans        | 16                   |
| Receiver Gain          | 89                   |
| Relaxation Delay       | 1.0000               |
| Pulse Width            | 9.7800               |
| Acquisition Time       | 4.0894               |
| Acquisition Date       | 2021-11-03T08:42:05  |
| Modification Date      | 2021-11-03T08:42:06  |
| Spectrometer Frequency | 400.15               |
| Spectral Width         | 8012.8               |
| Lowest Frequency       | -1546.0              |
| Nucleus                | <sup>1</sup> H       |
| Acquired Size          | 32768                |
| Spectral Size          | 65536                |

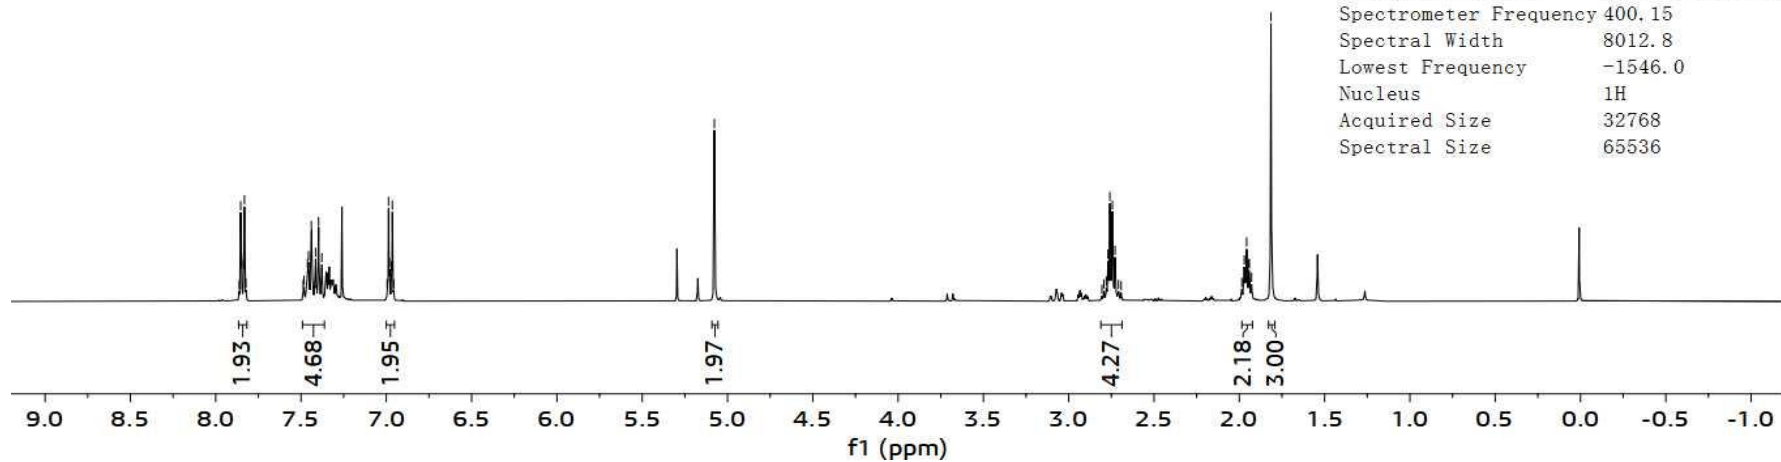

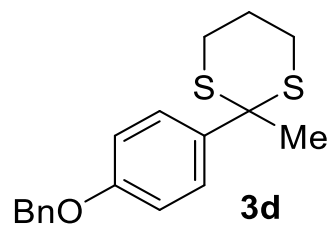

— 157.99  
 { 137.14  
 { 136.23  
 { 129.25  
 { 128.74  
 { 128.14  
 { 127.65  
 — 114.79

— 70.22

— 53.62

~ 32.25  
 ~ 28.30  
 ~ 24.92

|                        |                        |
|------------------------|------------------------|
| Title                  | WYX-16-YL-dian. 2. fid |
| Origin                 | Bruker BioSpin GmbH    |
| Owner                  | nmrsu                  |
| Spectrometer           | spect                  |
| Solvent                | CDC13                  |
| Temperature            | 298.0                  |
| Pulse Sequence         | zpg30                  |
| Experiment             | 1D                     |
| Number of Scans        | 600                    |
| Receiver Gain          | 202                    |
| Relaxation Delay       | 2.0000                 |
| Pulse Width            | 10.5800                |
| Acquisition Time       | 1.3631                 |
| Acquisition Date       | 2021-11-03T09:17:38    |
| Modification Date      | 2021-11-03T09:17:40    |
| Spectrometer Frequency | 100.63                 |
| Spectral Width         | 24038.5                |
| Lowest Frequency       | -1944.5                |
| Nucleus                | <sup>13</sup> C        |
| Acquired Size          | 32768                  |
| Spectral Size          | 65536                  |

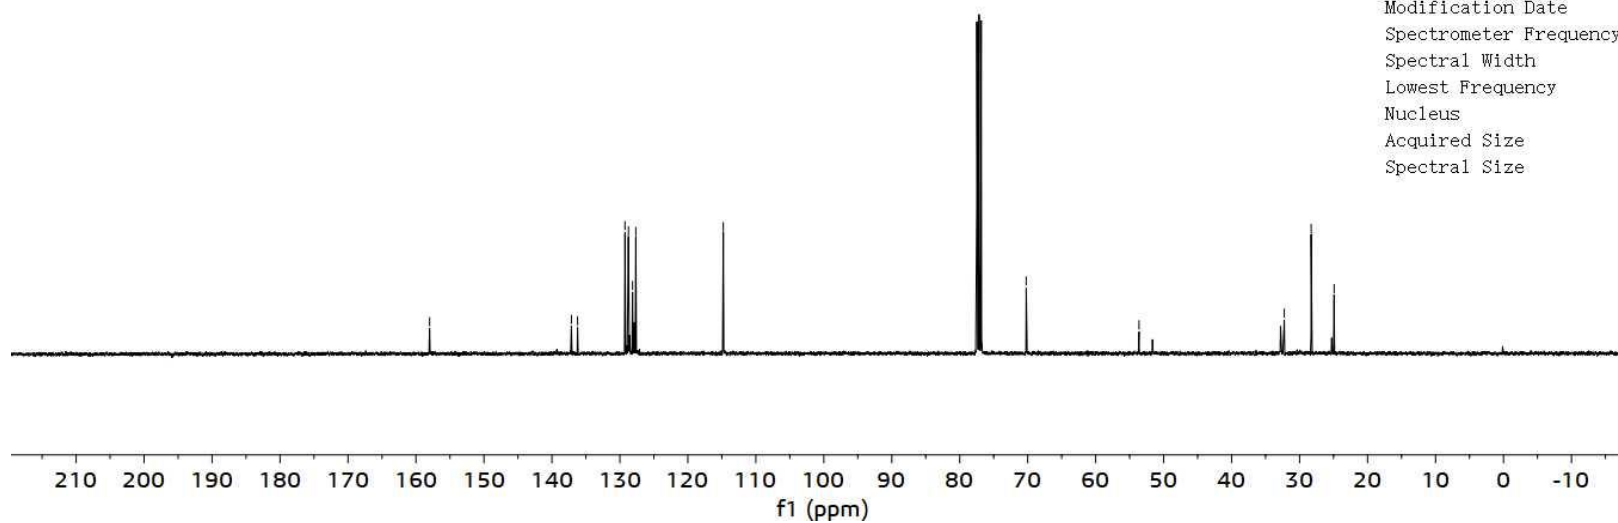

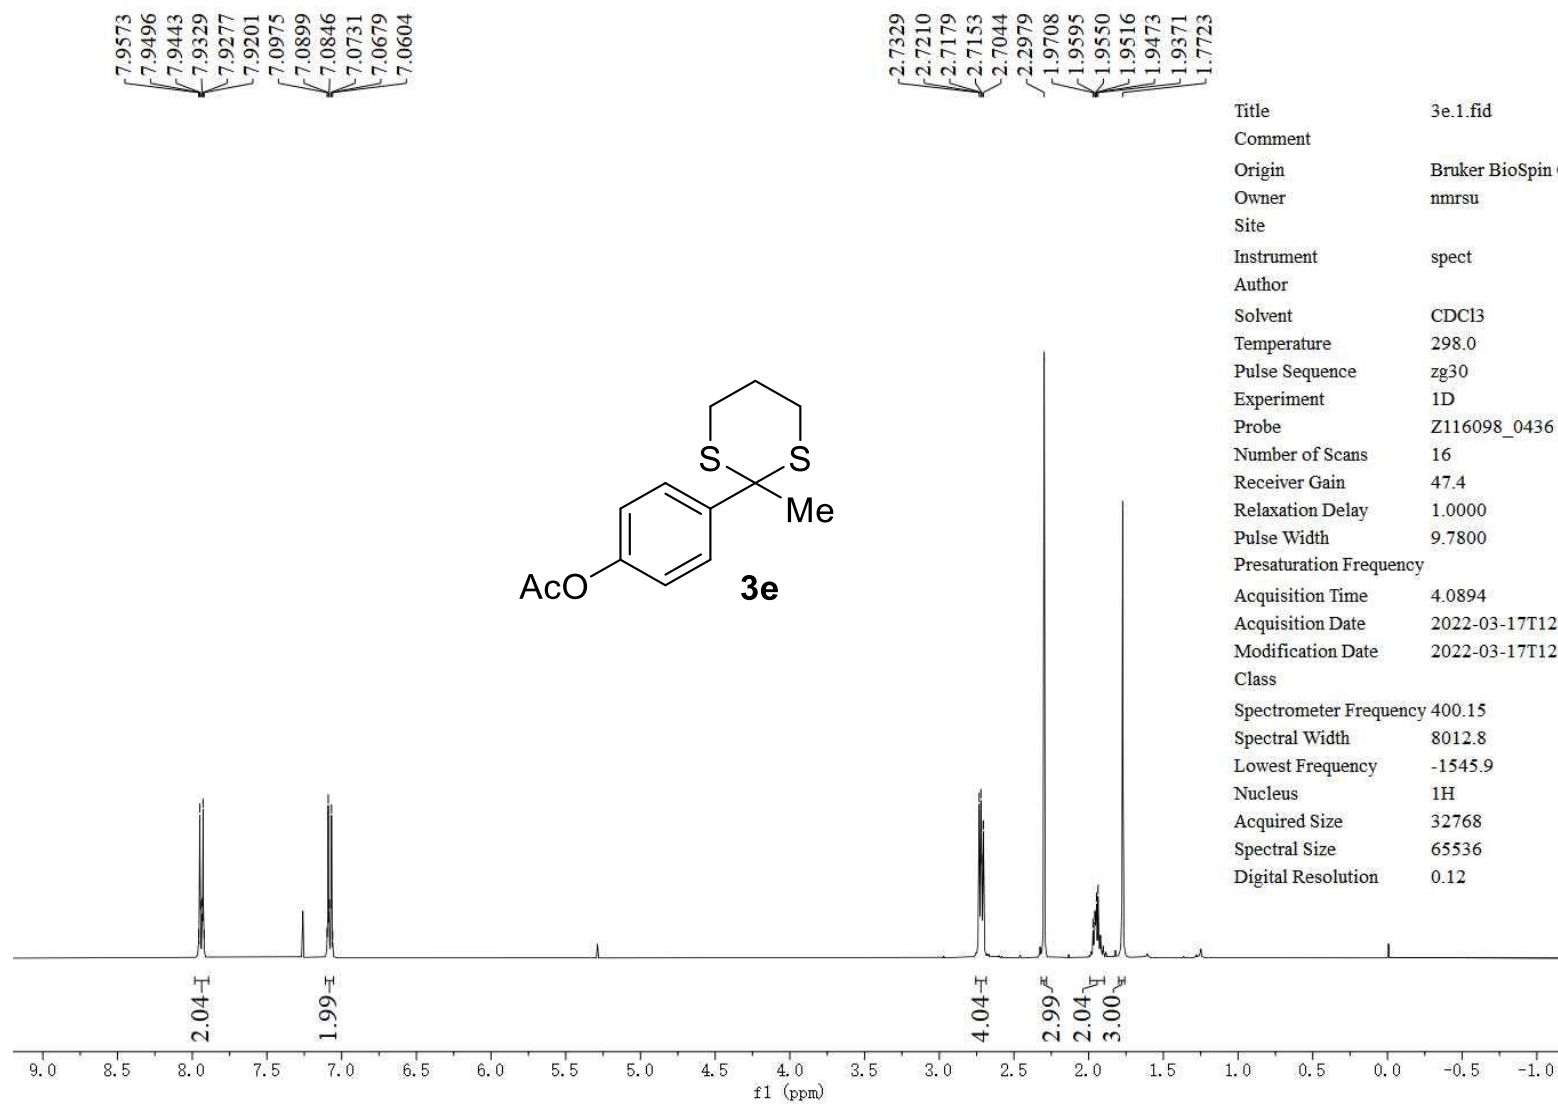

|                         |                                             |
|-------------------------|---------------------------------------------|
| Title                   | 3e.1.fid                                    |
| Comment                 |                                             |
| Origin                  | Bruker BioSpin GmbH                         |
| Owner                   | nmrsu                                       |
| Site                    |                                             |
| Instrument              | spect                                       |
| Author                  |                                             |
| Solvent                 | CDCl <sub>3</sub>                           |
| Temperature             | 298.0                                       |
| Pulse Sequence          | zg30                                        |
| Experiment              | 1D                                          |
| Probe                   | Z116098_0436 (PA BBO 400S1 BBF-H-D-05 Z SP) |
| Number of Scans         | 16                                          |
| Receiver Gain           | 47.4                                        |
| Relaxation Delay        | 1.0000                                      |
| Pulse Width             | 9.7800                                      |
| Presaturation Frequency |                                             |
| Acquisition Time        | 4.0894                                      |
| Acquisition Date        | 2022-03-17T12:45:47                         |
| Modification Date       | 2022-03-17T12:45:46                         |
| Class                   |                                             |
| Spectrometer Frequency  | 400.15                                      |
| Spectral Width          | 8012.8                                      |
| Lowest Frequency        | -1545.9                                     |
| Nucleus                 | <sup>1</sup> H                              |
| Acquired Size           | 32768                                       |
| Spectral Size           | 65536                                       |
| Digital Resolution      | 0.12                                        |

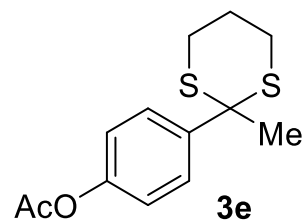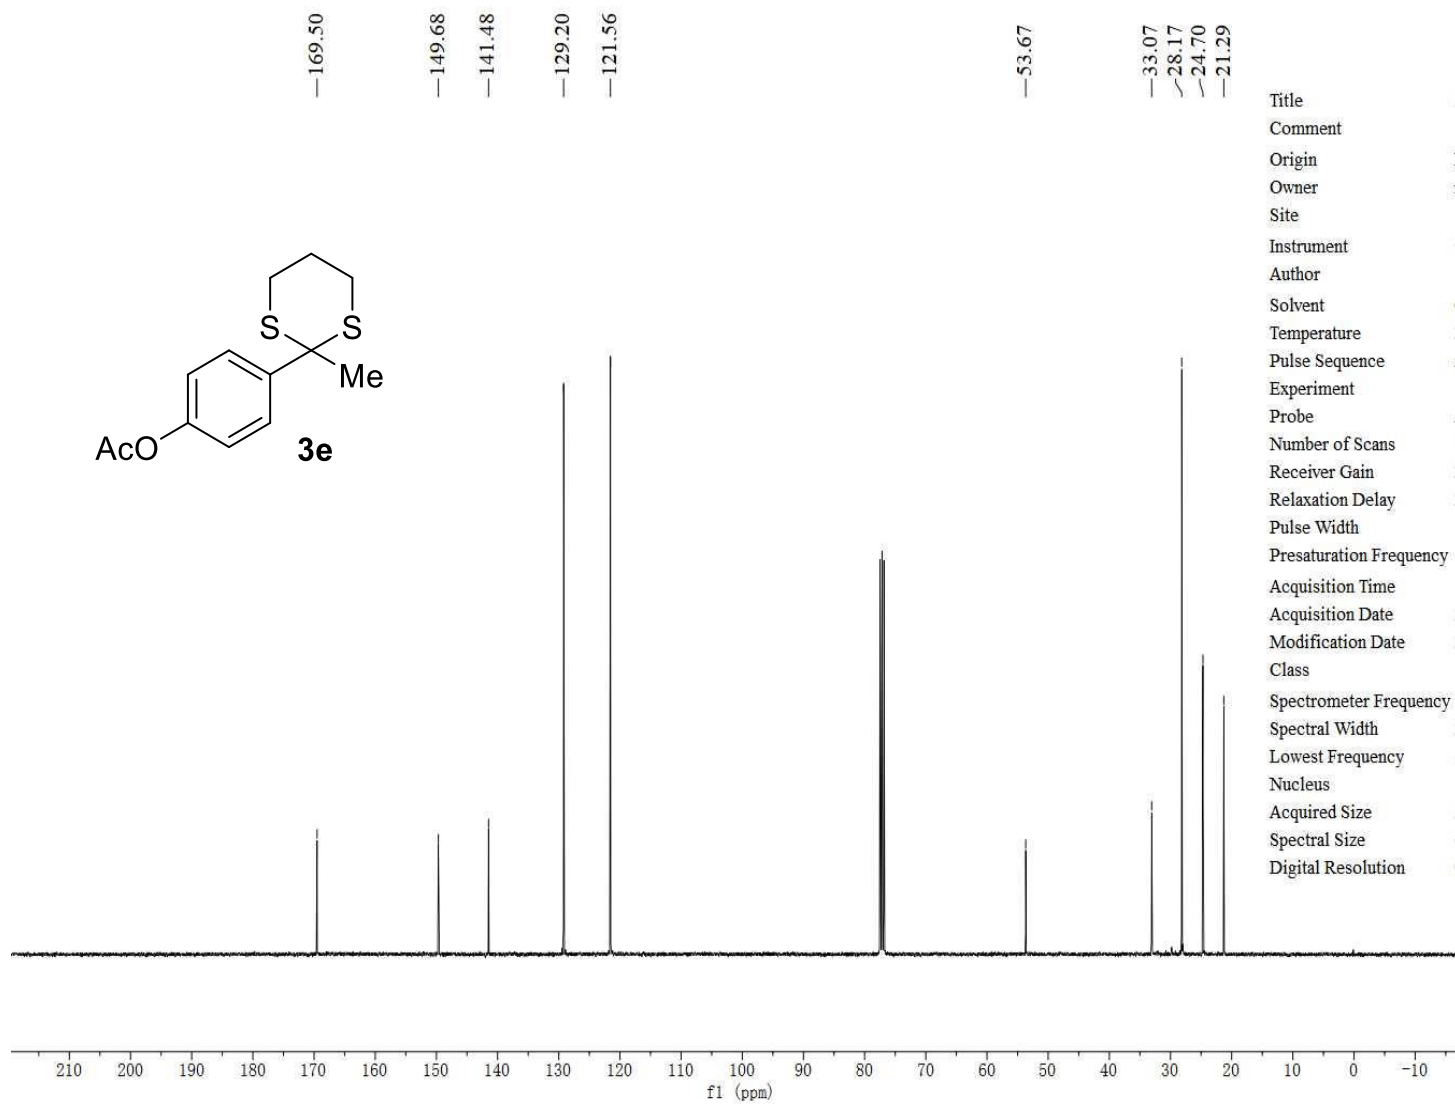

|                         |                                             |
|-------------------------|---------------------------------------------|
| Title                   | 3e.5.fid                                    |
| Comment                 |                                             |
| Origin                  | Bruker BioSpin GmbH                         |
| Owner                   | nmrsu                                       |
| Site                    |                                             |
| Instrument              | spect                                       |
| Author                  |                                             |
| Solvent                 | CDCl3                                       |
| Temperature             | 298.0                                       |
| Pulse Sequence          | zgpg30                                      |
| Experiment              | 1D                                          |
| Probe                   | Z116098_0436 (PA BBO 400S1 BBF-H-D-05 Z SP) |
| Number of Scans         | 1024                                        |
| Receiver Gain           | 202.1                                       |
| Relaxation Delay        | 2.0000                                      |
| Pulse Width             | 10.5800                                     |
| Presaturation Frequency |                                             |
| Acquisition Time        | 1.3631                                      |
| Acquisition Date        | 2022-03-18T07:33:56                         |
| Modification Date       | 2022-03-18T07:33:56                         |
| Class                   |                                             |
| Spectrometer Frequency  | 100.63                                      |
| Spectral Width          | 24038.5                                     |
| Lowest Frequency        | -1948.6                                     |
| Nucleus                 | 13C                                         |
| Acquired Size           | 32768                                       |
| Spectral Size           | 65536                                       |
| Digital Resolution      | 0.37                                        |

7.7441  
7.7310  
7.7219  
7.7087  
7.0093  
7.0008  
6.9953  
6.9792  
6.9630  
6.9574  
6.9510

3.5012  
3.4848  
3.4804  
3.4749  
3.4682  
3.4624  
3.4565  
3.4366  
3.4144  
3.3945  
3.3887  
3.3829  
3.3761  
3.3705  
3.3666  
3.3498  
-2.1343

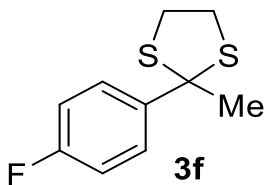

|                        |                     |
|------------------------|---------------------|
| Title                  | WYX-54-YL.1.fid     |
| Origin                 | Bruker BioSpin GmbH |
| Owner                  | nmrsu               |
| Spectrometer           | spect               |
| Solvent                | CDC13               |
| Temperature            | 298.0               |
| Pulse Sequence         | zg30                |
| Experiment             | 1D                  |
| Number of Scans        | 6                   |
| Receiver Gain          | 72                  |
| Relaxation Delay       | 1.0000              |
| Pulse Width            | 9.7800              |
| Acquisition Time       | 4.0894              |
| Acquisition Date       | 2021-10-20T07:46:27 |
| Modification Date      | 2021-10-20T07:46:28 |
| Spectrometer Frequency | 400.15              |
| Spectral Width         | 8012.8              |
| Lowest Frequency       | -1546.4             |
| Nucleus                | 1H                  |
| Acquired Size          | 32768               |
| Spectral Size          | 65536               |

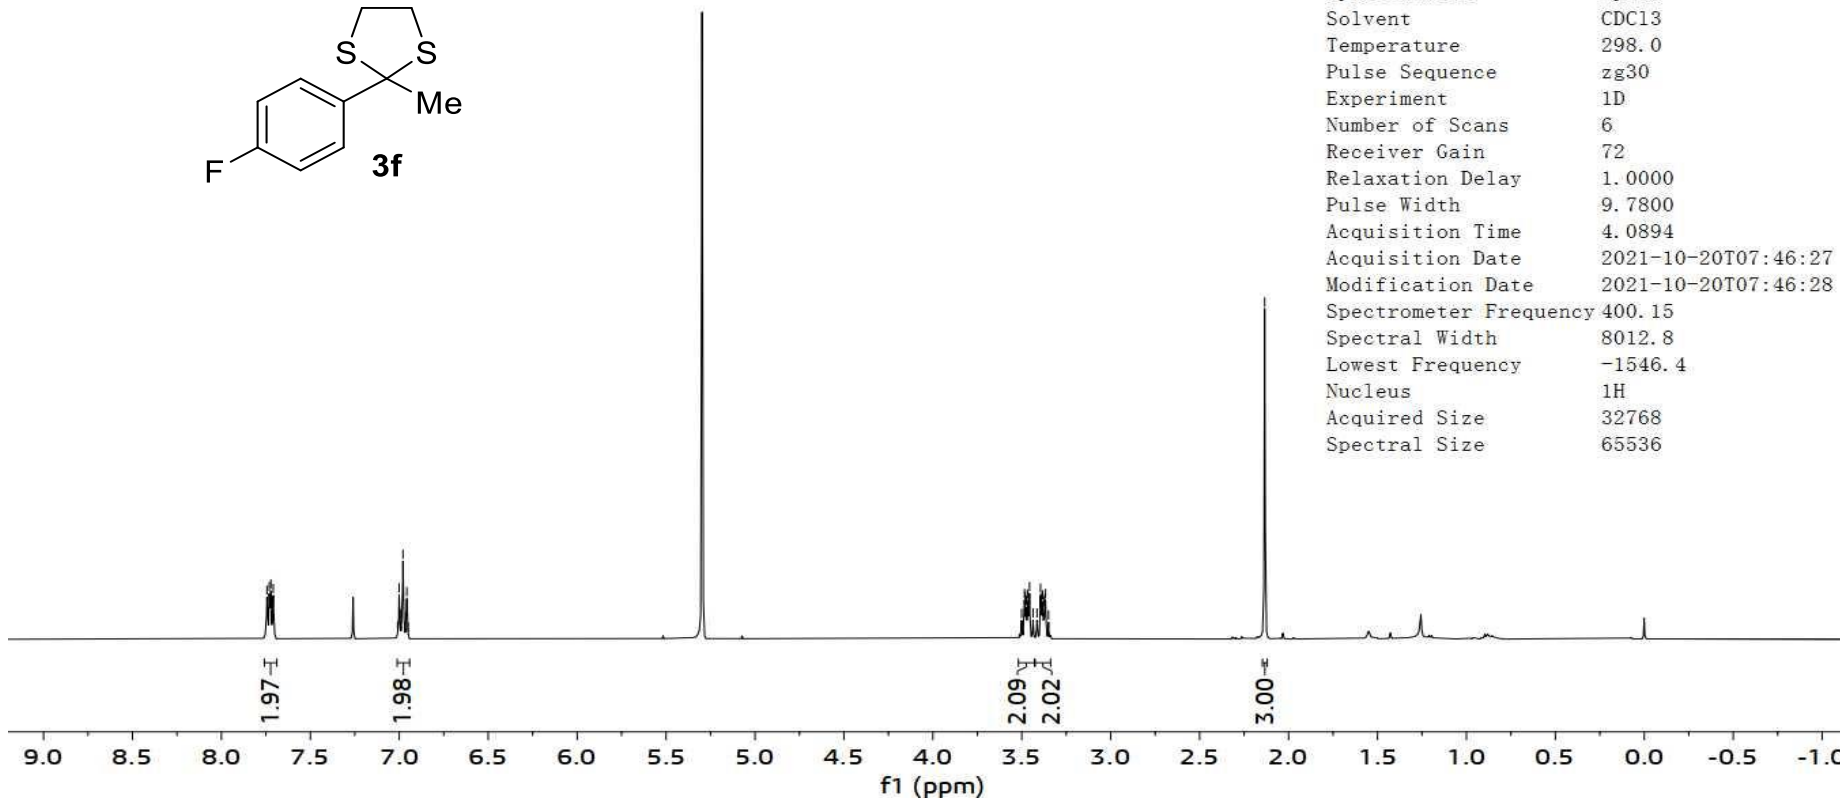



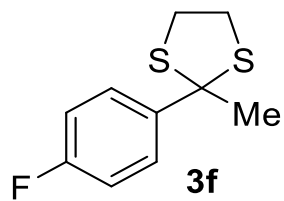

163.12  
160.67

141.88  
141.85

128.84  
128.76

114.88  
114.67

68.12

40.55  
34.02

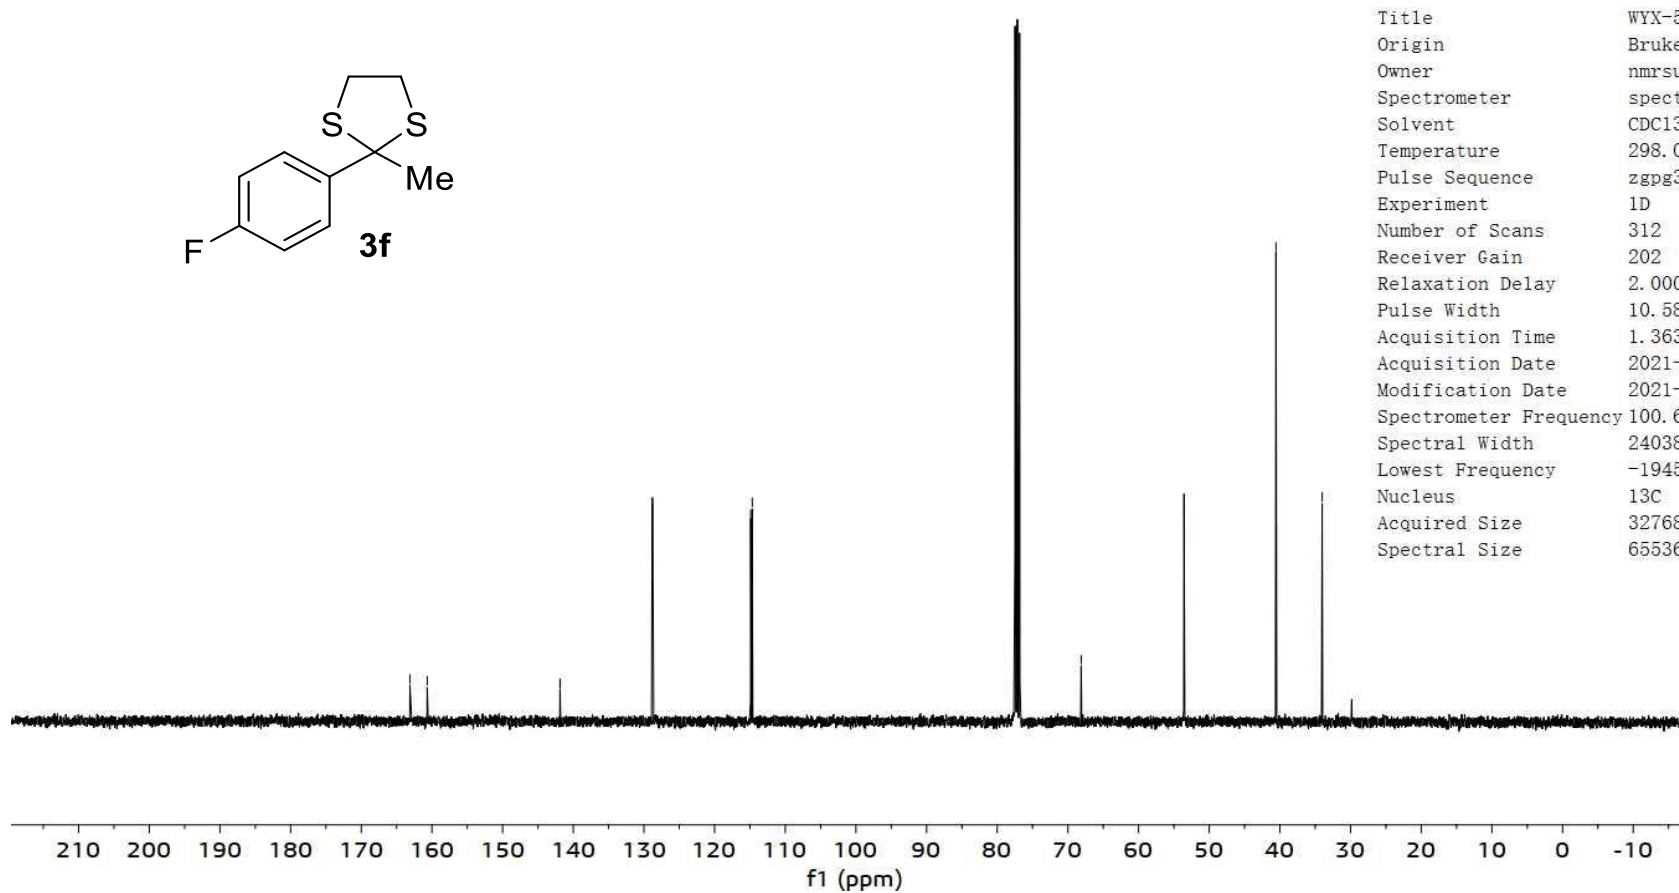

|                        |                     |
|------------------------|---------------------|
| Title                  | WYX-54-YL. 2. fid   |
| Origin                 | Bruker BioSpin GmbH |
| Owner                  | nmrsu               |
| Spectrometer           | spect               |
| Solvent                | CDCl3               |
| Temperature            | 298.0               |
| Pulse Sequence         | zgpg30              |
| Experiment             | 1D                  |
| Number of Scans        | 312                 |
| Receiver Gain          | 202                 |
| Relaxation Delay       | 2.0000              |
| Pulse Width            | 10.5800             |
| Acquisition Time       | 1.3631              |
| Acquisition Date       | 2021-10-20T08:05:27 |
| Modification Date      | 2021-10-20T08:05:28 |
| Spectrometer Frequency | 100.63              |
| Spectral Width         | 24038.5             |
| Lowest Frequency       | -1945.6             |
| Nucleus                | 13C                 |
| Acquired Size          | 32768               |
| Spectral Size          | 65536               |

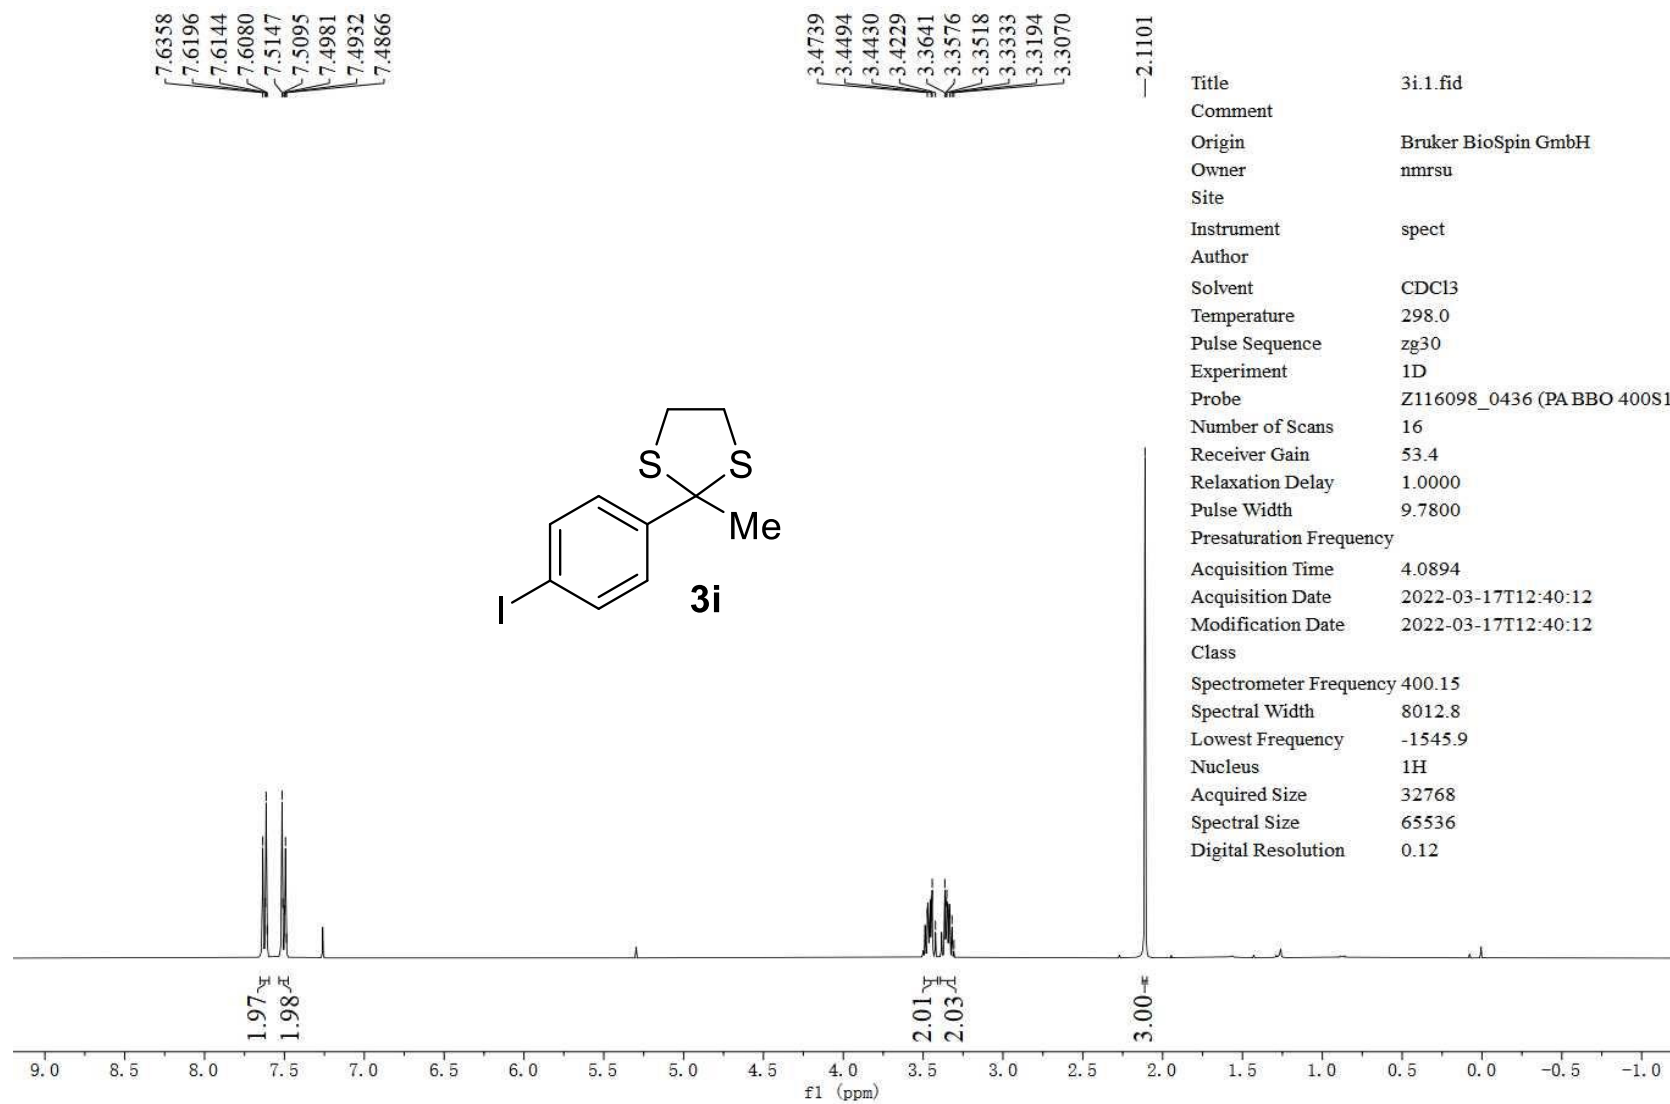

|                         |                                             |
|-------------------------|---------------------------------------------|
| Title                   | 3i.1.fid                                    |
| Comment                 |                                             |
| Origin                  | Bruker BioSpin GmbH                         |
| Owner                   | nmrsu                                       |
| Site                    |                                             |
| Instrument              | spect                                       |
| Author                  |                                             |
| Solvent                 | CDCl3                                       |
| Temperature             | 298.0                                       |
| Pulse Sequence          | zg30                                        |
| Experiment              | 1D                                          |
| Probe                   | Z116098_0436 (PA BBO 400S1 BBF-H-D-05 Z SP) |
| Number of Scans         | 16                                          |
| Receiver Gain           | 53.4                                        |
| Relaxation Delay        | 1.0000                                      |
| Pulse Width             | 9.7800                                      |
| Presaturation Frequency |                                             |
| Acquisition Time        | 4.0894                                      |
| Acquisition Date        | 2022-03-17T12:40:12                         |
| Modification Date       | 2022-03-17T12:40:12                         |
| Class                   |                                             |
| Spectrometer Frequency  | 400.15                                      |
| Spectral Width          | 8012.8                                      |
| Lowest Frequency        | -1545.9                                     |
| Nucleus                 | 1H                                          |
| Acquired Size           | 32768                                       |
| Spectral Size           | 65536                                       |
| Digital Resolution      | 0.12                                        |

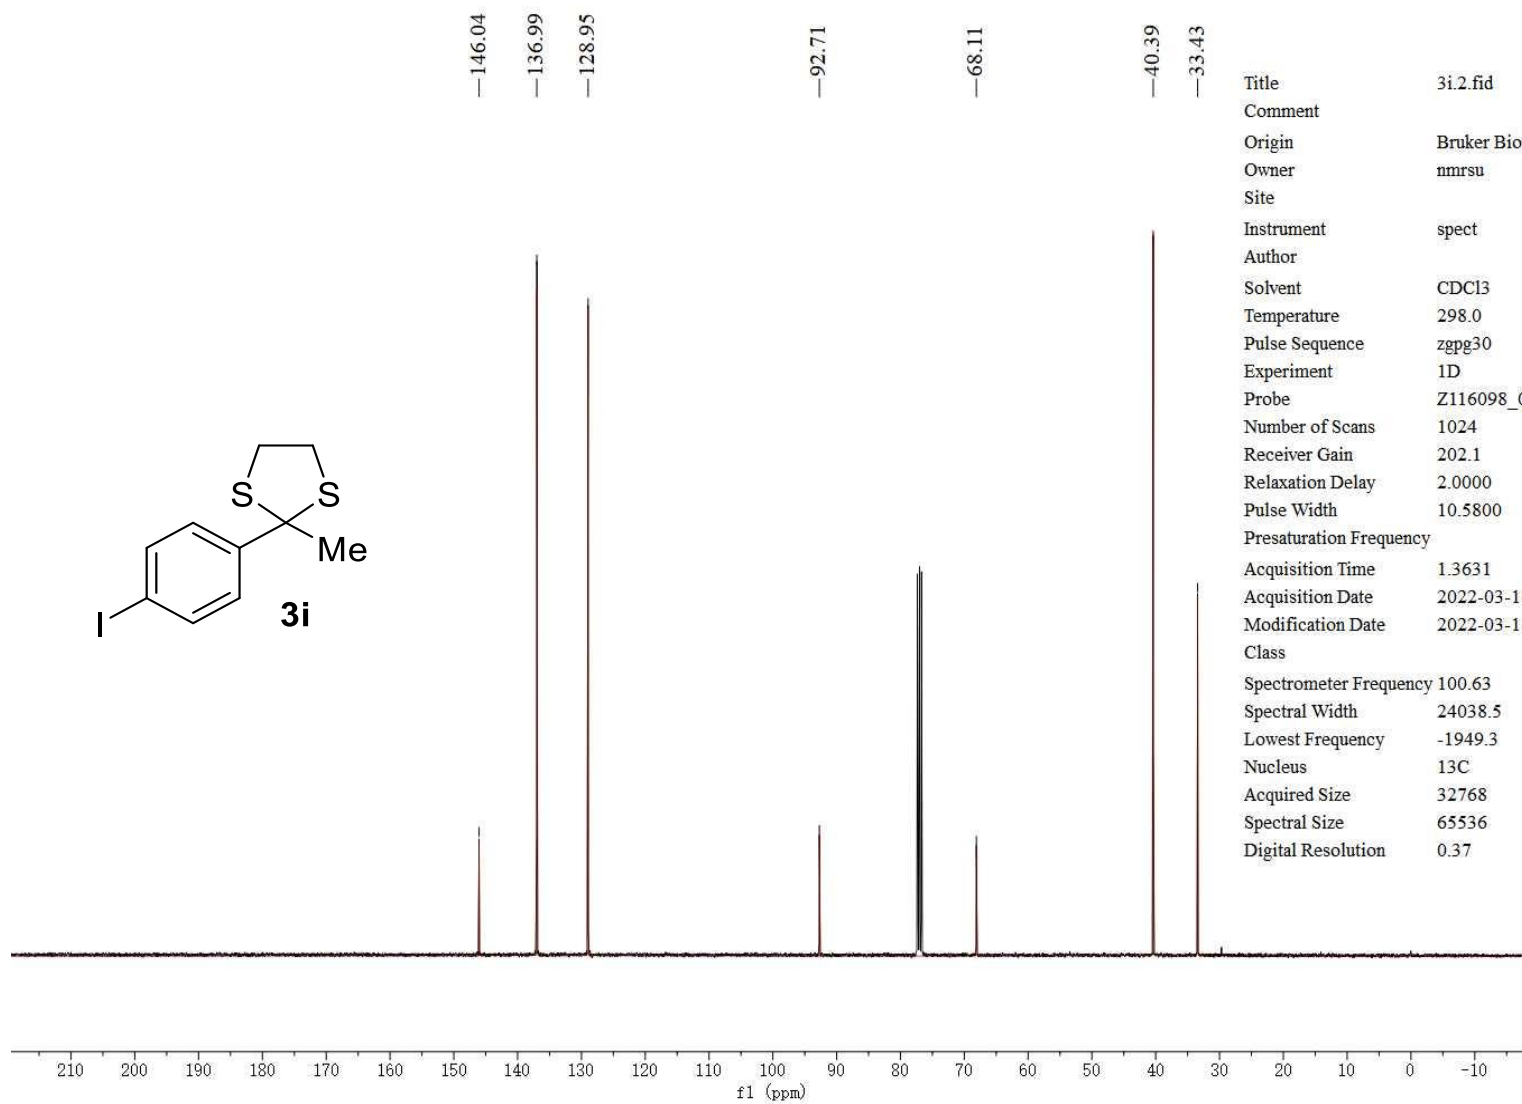

|                         |                                            |
|-------------------------|--------------------------------------------|
| Title                   | 3i.2.fid                                   |
| Comment                 |                                            |
| Origin                  | Bruker BioSpin GmbH                        |
| Owner                   | nmrstu                                     |
| Site                    |                                            |
| Instrument              | spect                                      |
| Author                  |                                            |
| Solvent                 | CDCl3                                      |
| Temperature             | 298.0                                      |
| Pulse Sequence          | zgpg30                                     |
| Experiment              | 1D                                         |
| Probe                   | Z116098_0436 (PABBO 400S1 BBF-H-D-05 Z SP) |
| Number of Scans         | 1024                                       |
| Receiver Gain           | 202.1                                      |
| Relaxation Delay        | 2.0000                                     |
| Pulse Width             | 10.5800                                    |
| Presaturation Frequency |                                            |
| Acquisition Time        | 1.3631                                     |
| Acquisition Date        | 2022-03-18T06:31:03                        |
| Modification Date       | 2022-03-18T06:31:02                        |
| Class                   |                                            |
| Spectrometer Frequency  | 100.63                                     |
| Spectral Width          | 24038.5                                    |
| Lowest Frequency        | -1949.3                                    |
| Nucleus                 | 13C                                        |
| Acquired Size           | 32768                                      |
| Spectral Size           | 65536                                      |
| Digital Resolution      | 0.37                                       |

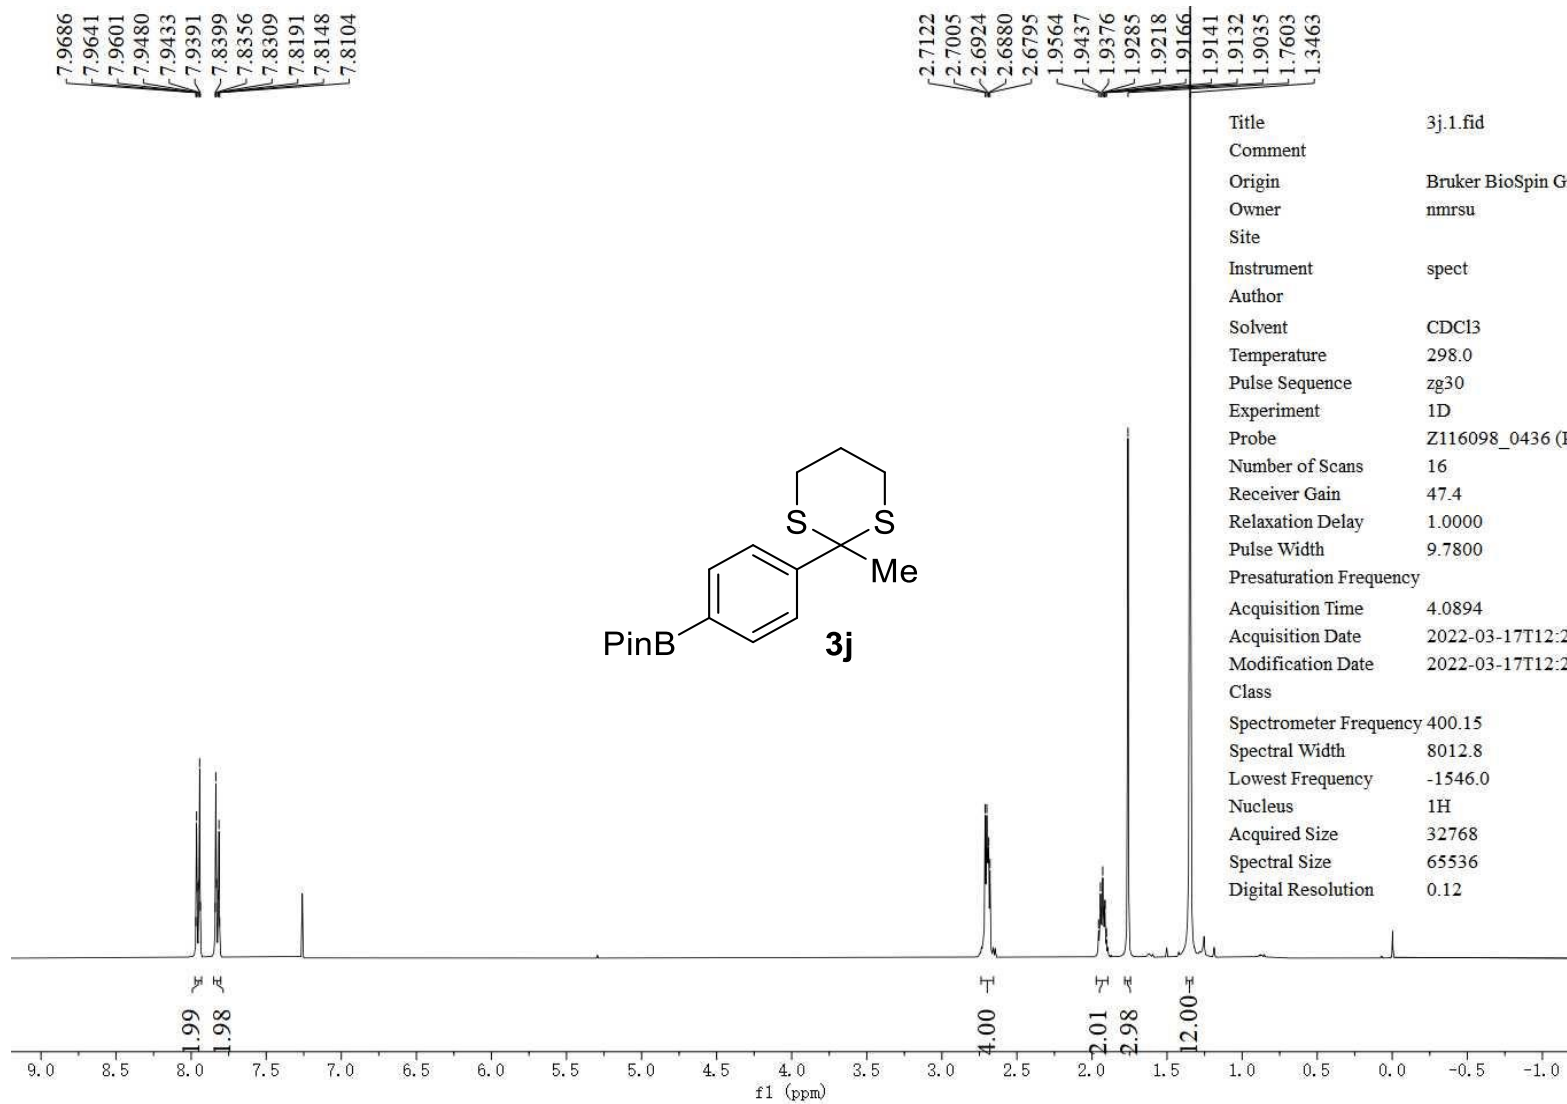

7.9686  
7.9641  
7.9601  
7.9480  
7.9433  
7.9391  
7.8399  
7.8356  
7.8309  
7.8191  
7.8148  
7.8104

2.7122  
2.7005  
2.6924  
2.6880  
2.6795  
1.9564  
1.9437  
1.9376  
1.9285  
1.9218  
1.9166  
1.9141  
1.9132  
1.9035  
1.7603  
1.3463

|                         |                                             |
|-------------------------|---------------------------------------------|
| Title                   | 3j.1.fid                                    |
| Comment                 |                                             |
| Origin                  | Bruker BioSpin GmbH                         |
| Owner                   | nmrsu                                       |
| Site                    |                                             |
| Instrument              | spect                                       |
| Author                  |                                             |
| Solvent                 | CDCl3                                       |
| Temperature             | 298.0                                       |
| Pulse Sequence          | zg30                                        |
| Experiment              | 1D                                          |
| Probe                   | Z116098_0436 (PA BBO 400S1 BBF-H-D-05 Z SP) |
| Number of Scans         | 16                                          |
| Receiver Gain           | 47.4                                        |
| Relaxation Delay        | 1.0000                                      |
| Pulse Width             | 9.7800                                      |
| Presaturation Frequency |                                             |
| Acquisition Time        | 4.0894                                      |
| Acquisition Date        | 2022-03-17T12:23:33                         |
| Modification Date       | 2022-03-17T12:23:32                         |
| Class                   |                                             |
| Spectrometer Frequency  | 400.15                                      |
| Spectral Width          | 8012.8                                      |
| Lowest Frequency        | -1546.0                                     |
| Nucleus                 | 1H                                          |
| Acquired Size           | 32768                                       |
| Spectral Size           | 65536                                       |
| Digital Resolution      | 0.12                                        |

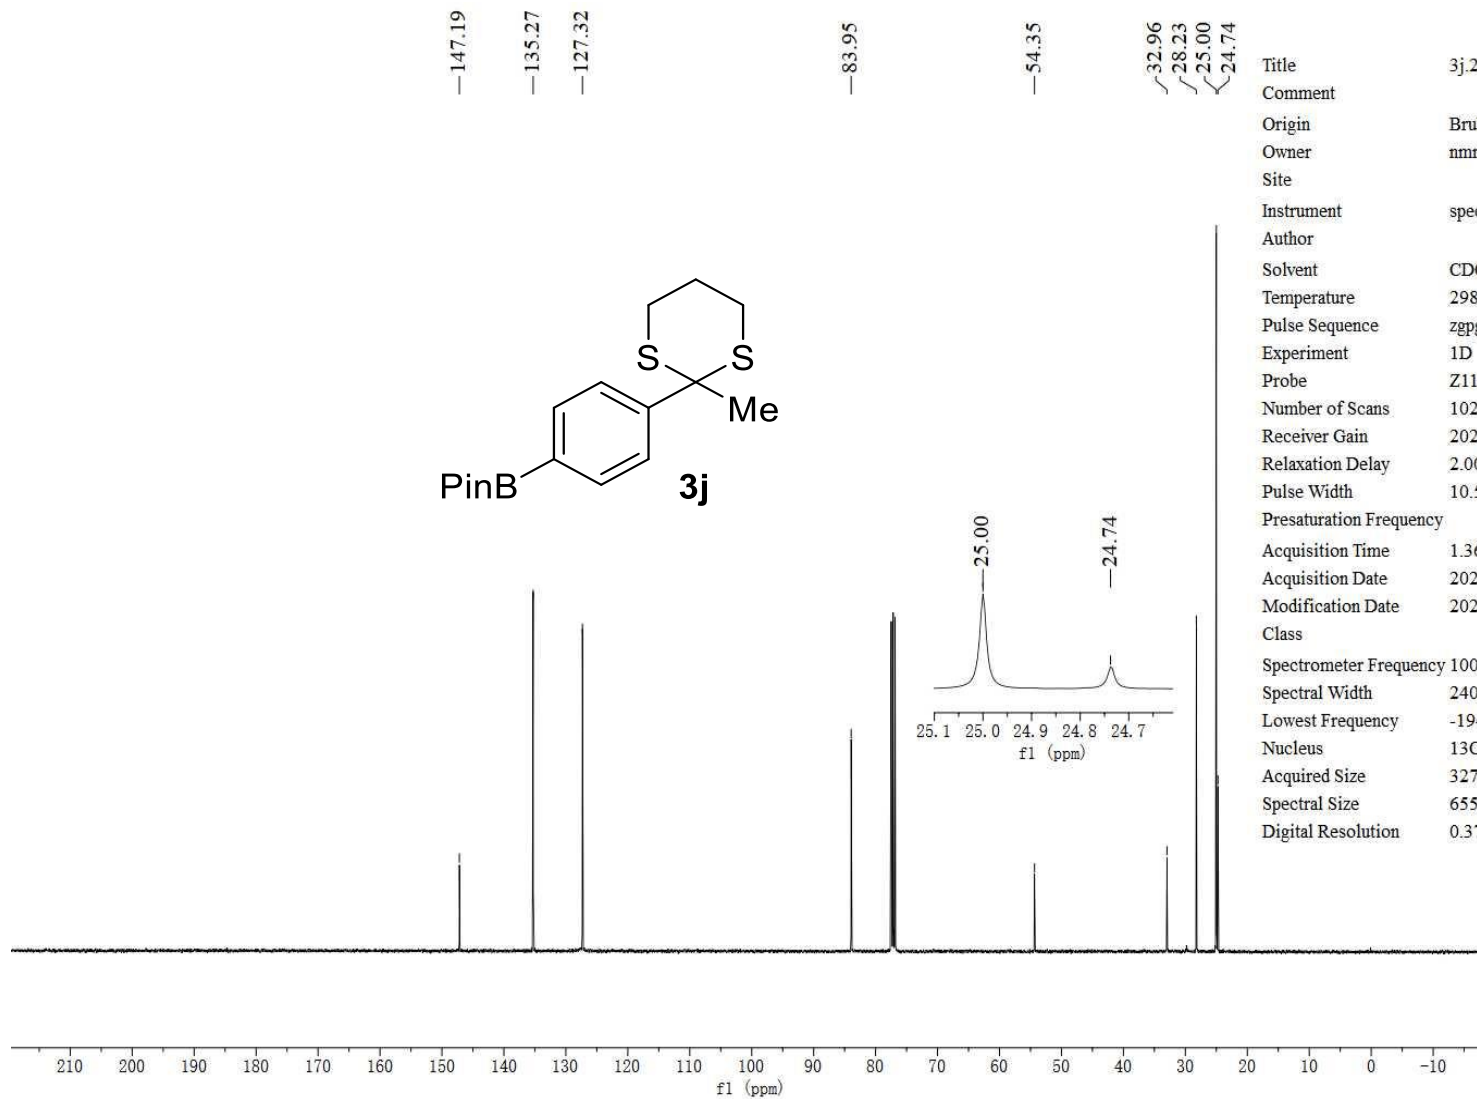

|                         |                                             |
|-------------------------|---------------------------------------------|
| Title                   | 3j.2.fid                                    |
| Comment                 |                                             |
| Origin                  | Bruker BioSpin GmbH                         |
| Owner                   | nmrsu                                       |
| Site                    |                                             |
| Instrument              | spect                                       |
| Author                  |                                             |
| Solvent                 | CDCl3                                       |
| Temperature             | 298.0                                       |
| Pulse Sequence          | zgpg30                                      |
| Experiment              | 1D                                          |
| Probe                   | Z116098_0436 (PA BBO 400S1 BBF-H-D-05 Z SP) |
| Number of Scans         | 1024                                        |
| Receiver Gain           | 202.1                                       |
| Relaxation Delay        | 2.0000                                      |
| Pulse Width             | 10.5800                                     |
| Presaturation Frequency |                                             |
| Acquisition Time        | 1.3631                                      |
| Acquisition Date        | 2022-03-18T03:22:46                         |
| Modification Date       | 2022-03-18T03:22:46                         |
| Class                   |                                             |
| Spectrometer Frequency  | 100.63                                      |
| Spectral Width          | 24038.5                                     |
| Lowest Frequency        | -1946.4                                     |
| Nucleus                 | 13C                                         |
| Acquired Size           | 32768                                       |
| Spectral Size           | 65536                                       |
| Digital Resolution      | 0.37                                        |

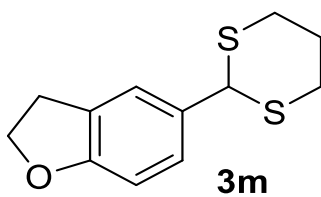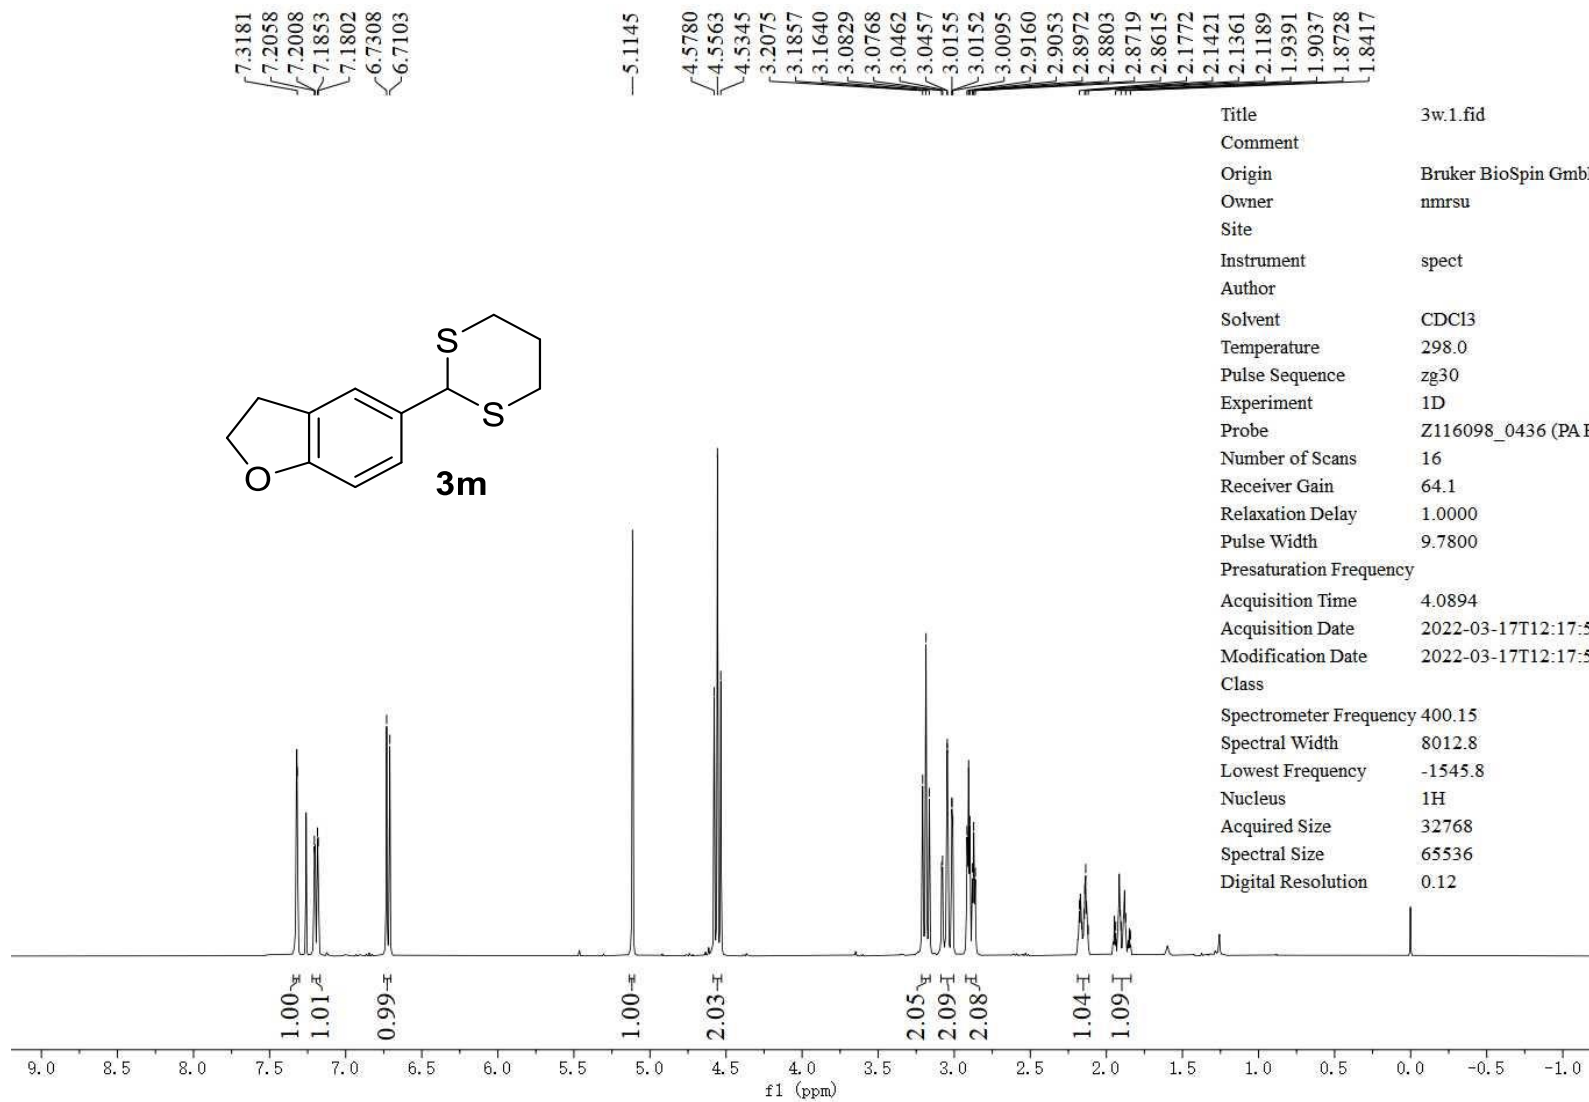

|                         |                                             |
|-------------------------|---------------------------------------------|
| Title                   | 3w.1.fid                                    |
| Comment                 |                                             |
| Origin                  | Bruker BioSpin GmbH                         |
| Owner                   | nmrsu                                       |
| Site                    |                                             |
| Instrument              | spect                                       |
| Author                  |                                             |
| Solvent                 | CDCl3                                       |
| Temperature             | 298.0                                       |
| Pulse Sequence          | zg30                                        |
| Experiment              | 1D                                          |
| Probe                   | Z116098_0436 (PA BBO 400S1 BBF-H-D-05 Z SP) |
| Number of Scans         | 16                                          |
| Receiver Gain           | 64.1                                        |
| Relaxation Delay        | 1.0000                                      |
| Pulse Width             | 9.7800                                      |
| Presaturation Frequency |                                             |
| Acquisition Time        | 4.0894                                      |
| Acquisition Date        | 2022-03-17T12:17:57                         |
| Modification Date       | 2022-03-17T12:17:56                         |
| Class                   |                                             |
| Spectrometer Frequency  | 400.15                                      |
| Spectral Width          | 8012.8                                      |
| Lowest Frequency        | -1545.8                                     |
| Nucleus                 | 1H                                          |
| Acquired Size           | 32768                                       |
| Spectral Size           | 65536                                       |
| Digital Resolution      | 0.12                                        |

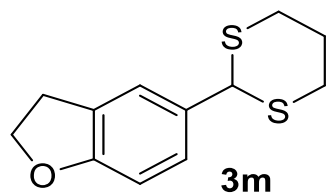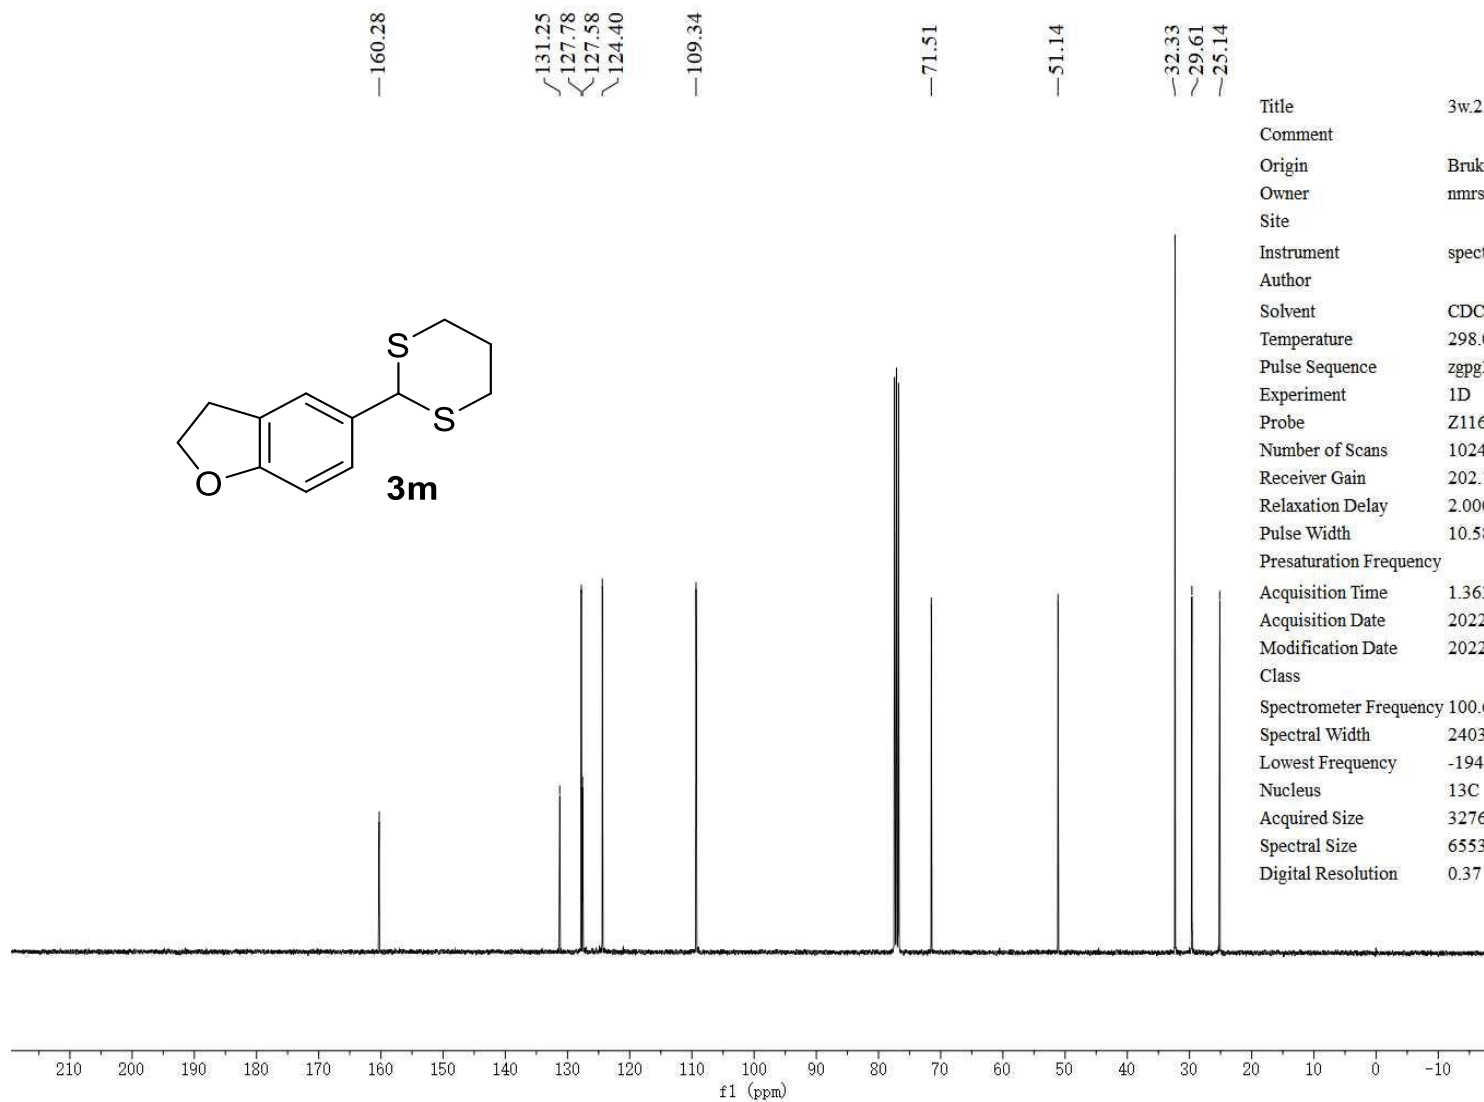

|                         |                                             |
|-------------------------|---------------------------------------------|
| Title                   | 3w.2.fid                                    |
| Comment                 |                                             |
| Origin                  | Bruker BioSpin GmbH                         |
| Owner                   | nmrsu                                       |
| Site                    |                                             |
| Instrument              | spect                                       |
| Author                  |                                             |
| Solvent                 | CDCl3                                       |
| Temperature             | 298.0                                       |
| Pulse Sequence          | zgpg30                                      |
| Experiment              | 1D                                          |
| Probe                   | Z116098_0436 (PA BBO 400S1 BBF-H-D-05 Z SP) |
| Number of Scans         | 1024                                        |
| Receiver Gain           | 202.1                                       |
| Relaxation Delay        | 2.0000                                      |
| Pulse Width             | 10.5800                                     |
| Presaturation Frequency |                                             |
| Acquisition Time        | 1.3631                                      |
| Acquisition Date        | 2022-03-18T02:19:51                         |
| Modification Date       | 2022-03-18T02:19:50                         |
| Class                   |                                             |
| Spectrometer Frequency  | 100.63                                      |
| Spectral Width          | 24038.5                                     |
| Lowest Frequency        | -1949.3                                     |
| Nucleus                 | 13C                                         |
| Acquired Size           | 32768                                       |
| Spectral Size           | 65536                                       |
| Digital Resolution      | 0.37                                        |

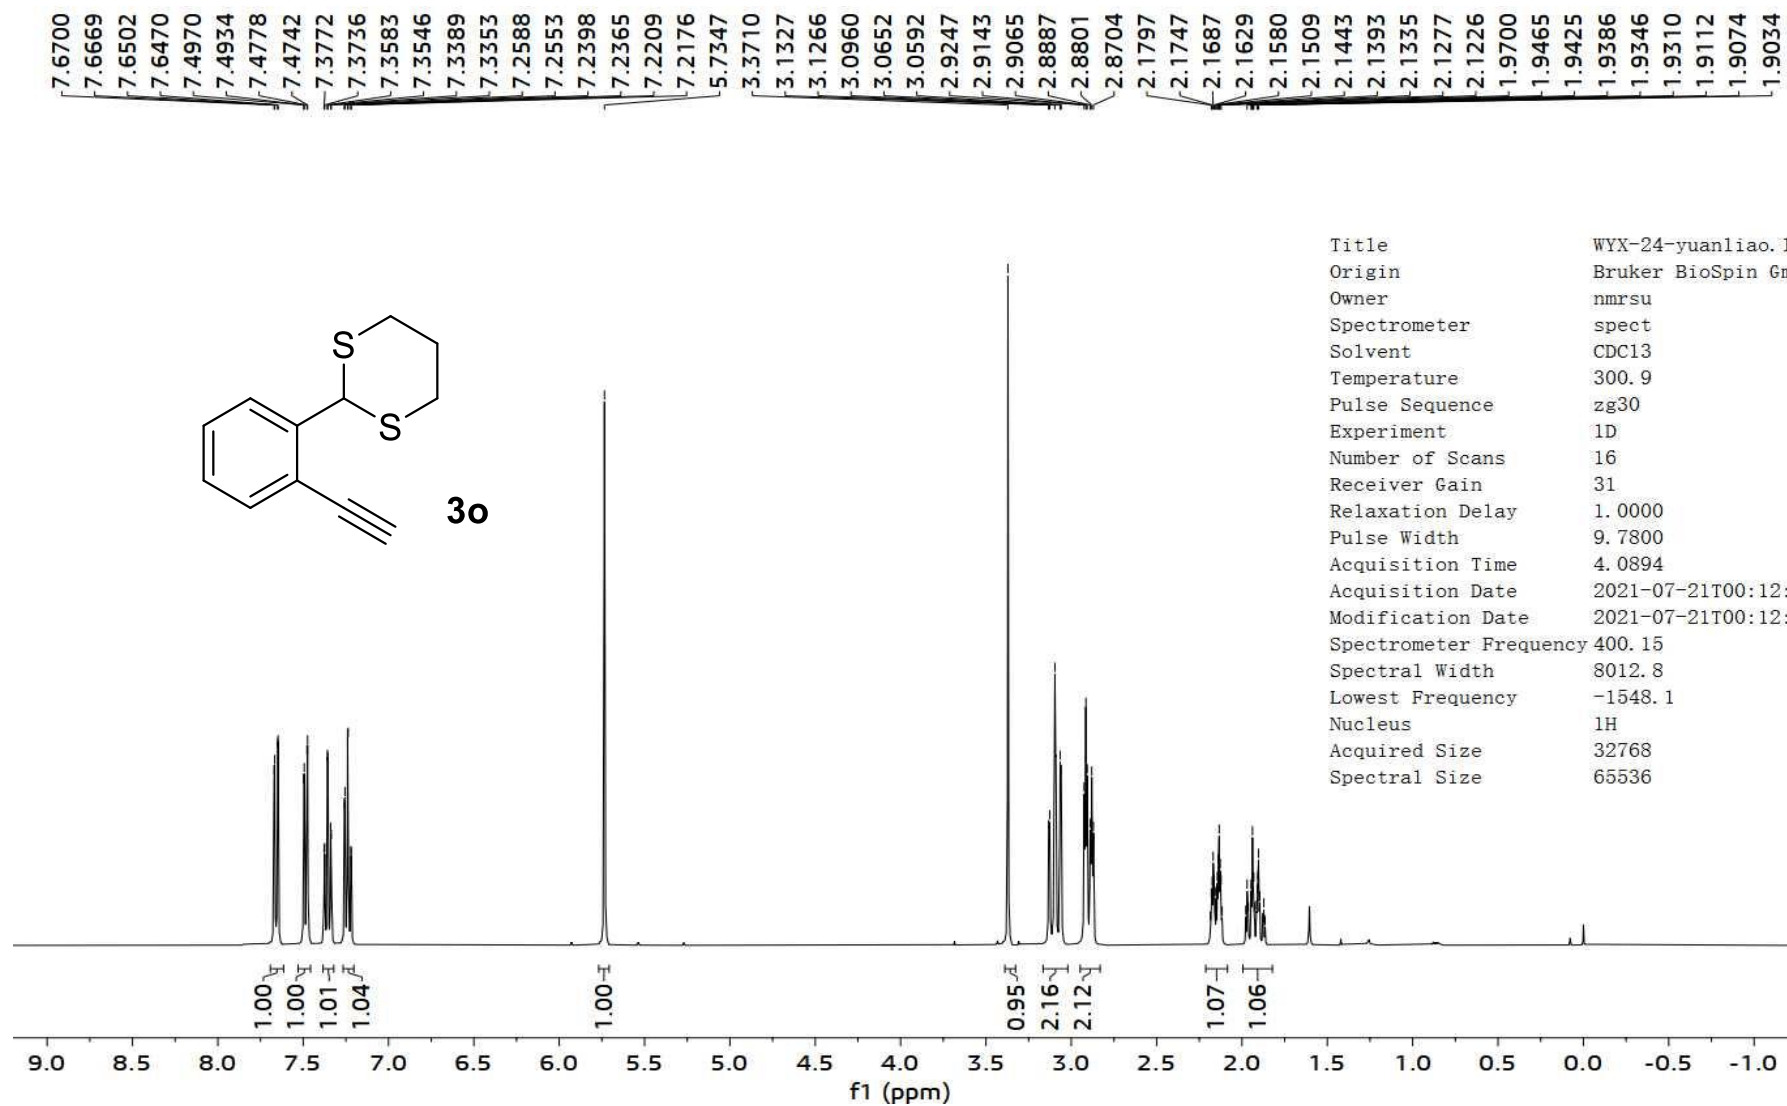

|                        |                       |
|------------------------|-----------------------|
| Title                  | WYX-24-yuanliao.1.fid |
| Origin                 | Bruker BioSpin GmbH   |
| Owner                  | nmrsu                 |
| Spectrometer           | spect                 |
| Solvent                | CDC13                 |
| Temperature            | 300.9                 |
| Pulse Sequence         | zg30                  |
| Experiment             | 1D                    |
| Number of Scans        | 16                    |
| Receiver Gain          | 31                    |
| Relaxation Delay       | 1.0000                |
| Pulse Width            | 9.7800                |
| Acquisition Time       | 4.0894                |
| Acquisition Date       | 2021-07-21T00:12:11   |
| Modification Date      | 2021-07-21T00:12:12   |
| Spectrometer Frequency | 400.15                |
| Spectral Width         | 8012.8                |
| Lowest Frequency       | -1548.1               |
| Nucleus                | 1H                    |
| Acquired Size          | 32768                 |
| Spectral Size          | 65536                 |



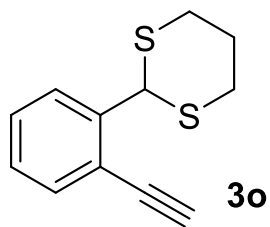

141.01  
133.05  
129.58  
128.14  
128.09  
120.65

82.24  
80.93

48.91

32.34  
25.20

|                        |                       |
|------------------------|-----------------------|
| Title                  | WYX-24-yuanliao.2.fid |
| Origin                 | Bruker BioSpin GmbH   |
| Owner                  | nrsu                  |
| Spectrometer           | spect                 |
| Solvent                | CDC13                 |
| Temperature            | 301.5                 |
| Pulse Sequence         | zgpg30                |
| Experiment             | 1D                    |
| Number of Scans        | 750                   |
| Receiver Gain          | 202                   |
| Relaxation Delay       | 2.0000                |
| Pulse Width            | 10.5800               |
| Acquisition Time       | 1.3631                |
| Acquisition Date       | 2021-07-21T00:56:06   |
| Modification Date      | 2021-07-21T00:56:08   |
| Spectrometer Frequency | 100.63                |
| Spectral Width         | 24038.5               |
| Lowest Frequency       | -1957.4               |
| Nucleus                | 13C                   |
| Acquired Size          | 32768                 |
| Spectral Size          | 65536                 |

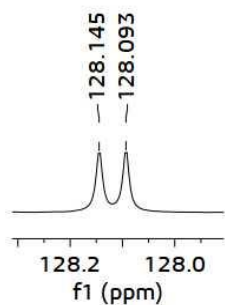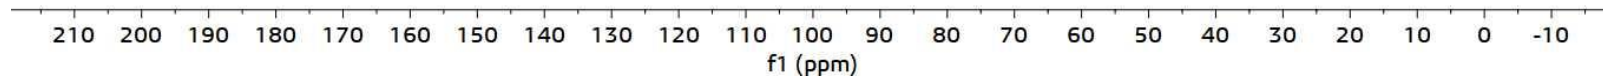

7.5228  
7.5040  
7.4736  
7.4534  
7.2554  
7.2518  
7.2352  
7.2312  
7.2110  
7.2080  
7.1924  
6.7737

5.2580  
3.0097  
3.0015  
2.9931  
2.9849  
2.9739  
2.9659  
2.9577  
2.9493  
2.9282  
2.9206  
2.9043  
2.8967  
2.8855  
2.8686  
2.8612  
2.1336  
2.1101  
2.0746  
2.0584  
2.0509  
2.0303  
2.0220  
1.9980  
1.9739  
1.9635  
1.9308

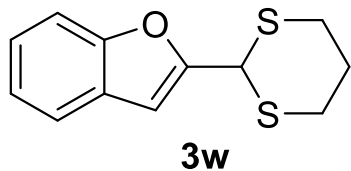

|                        |                     |
|------------------------|---------------------|
| Title                  | WYX-21-YL.1.fid     |
| Origin                 | Bruker BioSpin GmbH |
| Owner                  | nmrsu               |
| Spectrometer           | spect               |
| Solvent                | CDC13               |
| Temperature            | 298.0               |
| Pulse Sequence         | zg30                |
| Experiment             | 1D                  |
| Number of Scans        | 16                  |
| Receiver Gain          | 17                  |
| Relaxation Delay       | 1.0000              |
| Pulse Width            | 9.7800              |
| Acquisition Time       | 4.0894              |
| Acquisition Date       | 2021-10-20T07:34:30 |
| Modification Date      | 2021-10-20T07:34:30 |
| Spectrometer Frequency | 400.15              |
| Spectral Width         | 8012.8              |
| Lowest Frequency       | -1558.6             |
| Nucleus                | <sup>1</sup> H      |
| Acquired Size          | 32768               |
| Spectral Size          | 65536               |

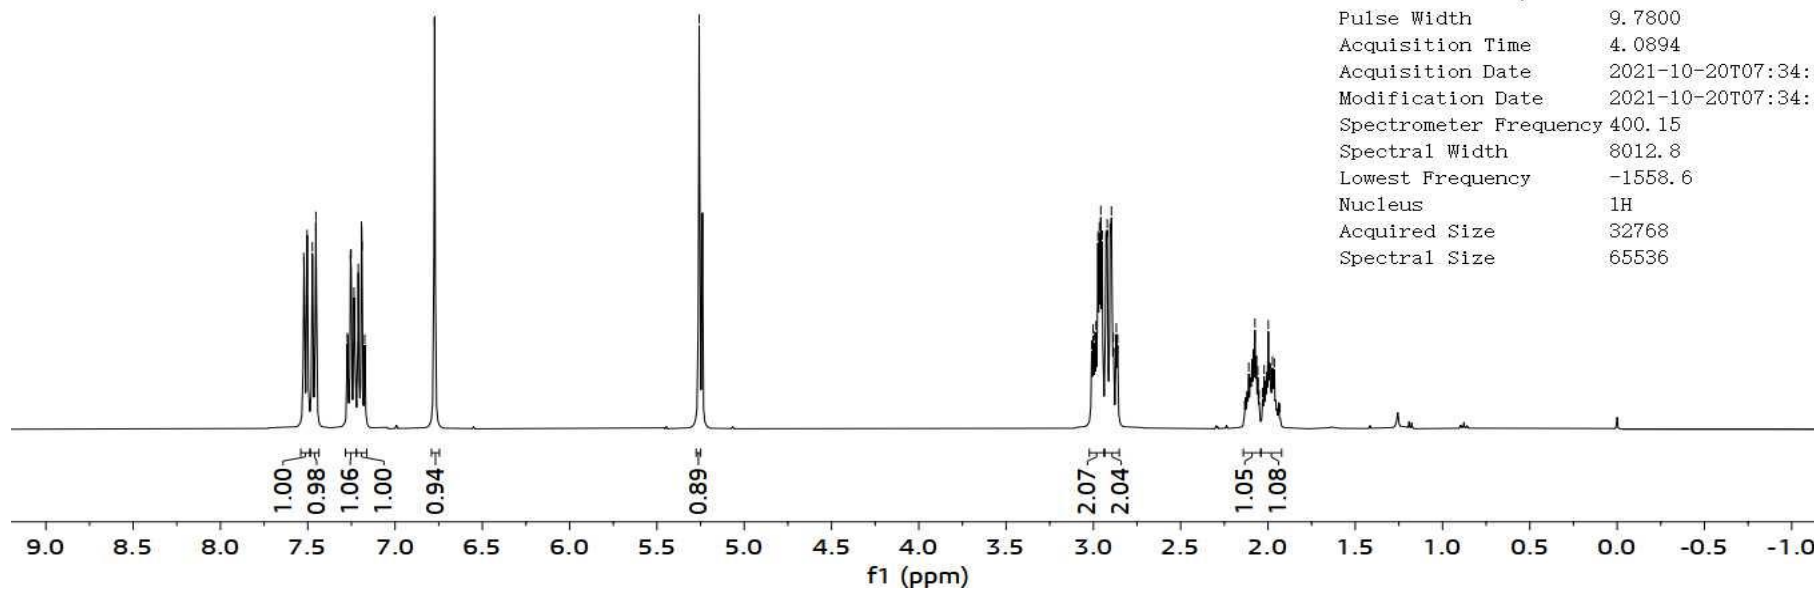

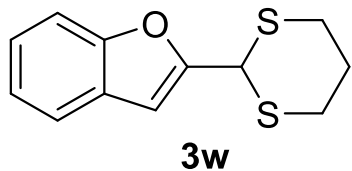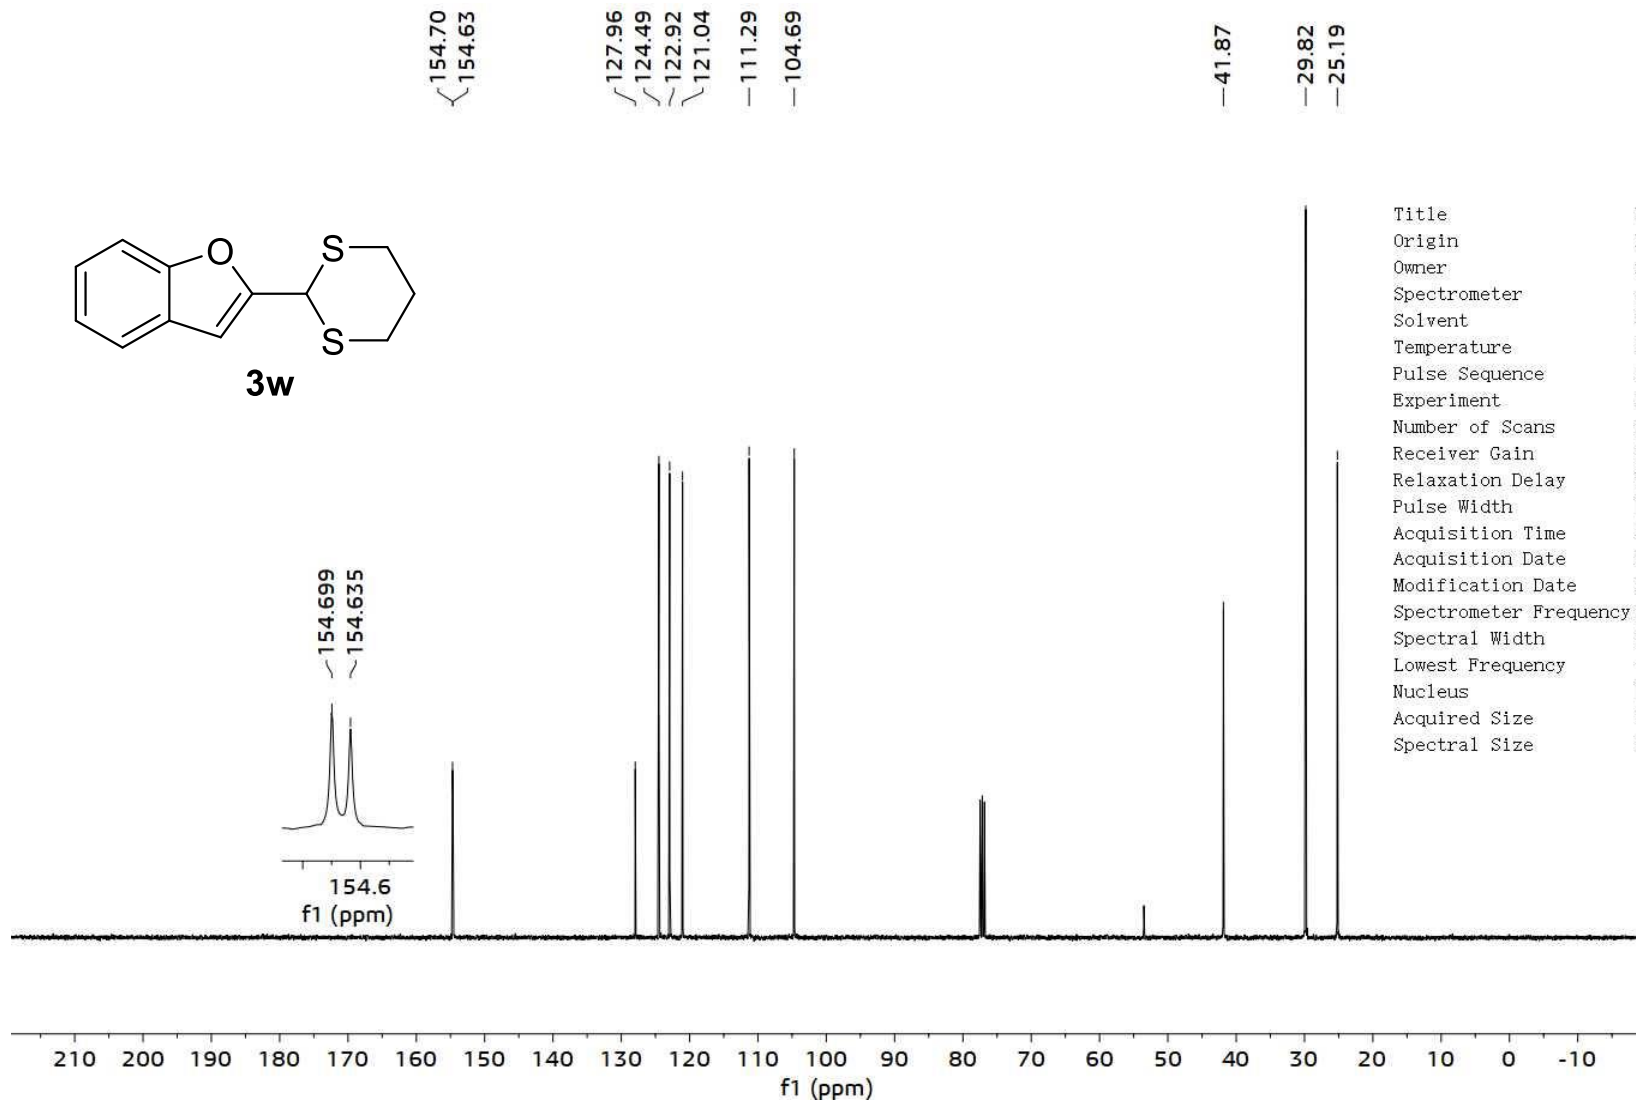

|                        |                     |
|------------------------|---------------------|
| Title                  | WYX-21-YL. 2. fid   |
| Origin                 | Bruker BioSpin GmbH |
| Owner                  | nmrsu               |
| Spectrometer           | spect               |
| Solvent                | CDC13               |
| Temperature            | 298.0               |
| Pulse Sequence         | zgpg30              |
| Experiment             | 1D                  |
| Number of Scans        | 100                 |
| Receiver Gain          | 202                 |
| Relaxation Delay       | 2.0000              |
| Pulse Width            | 10.5800             |
| Acquisition Time       | 1.3631              |
| Acquisition Date       | 2021-10-20T07:41:21 |
| Modification Date      | 2021-10-20T07:41:22 |
| Spectrometer Frequency | 100.63              |
| Spectral Width         | 24038.5             |
| Lowest Frequency       | -1970.2             |
| Nucleus                | 13C                 |
| Acquired Size          | 32768               |
| Spectral Size          | 65536               |

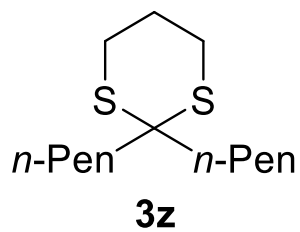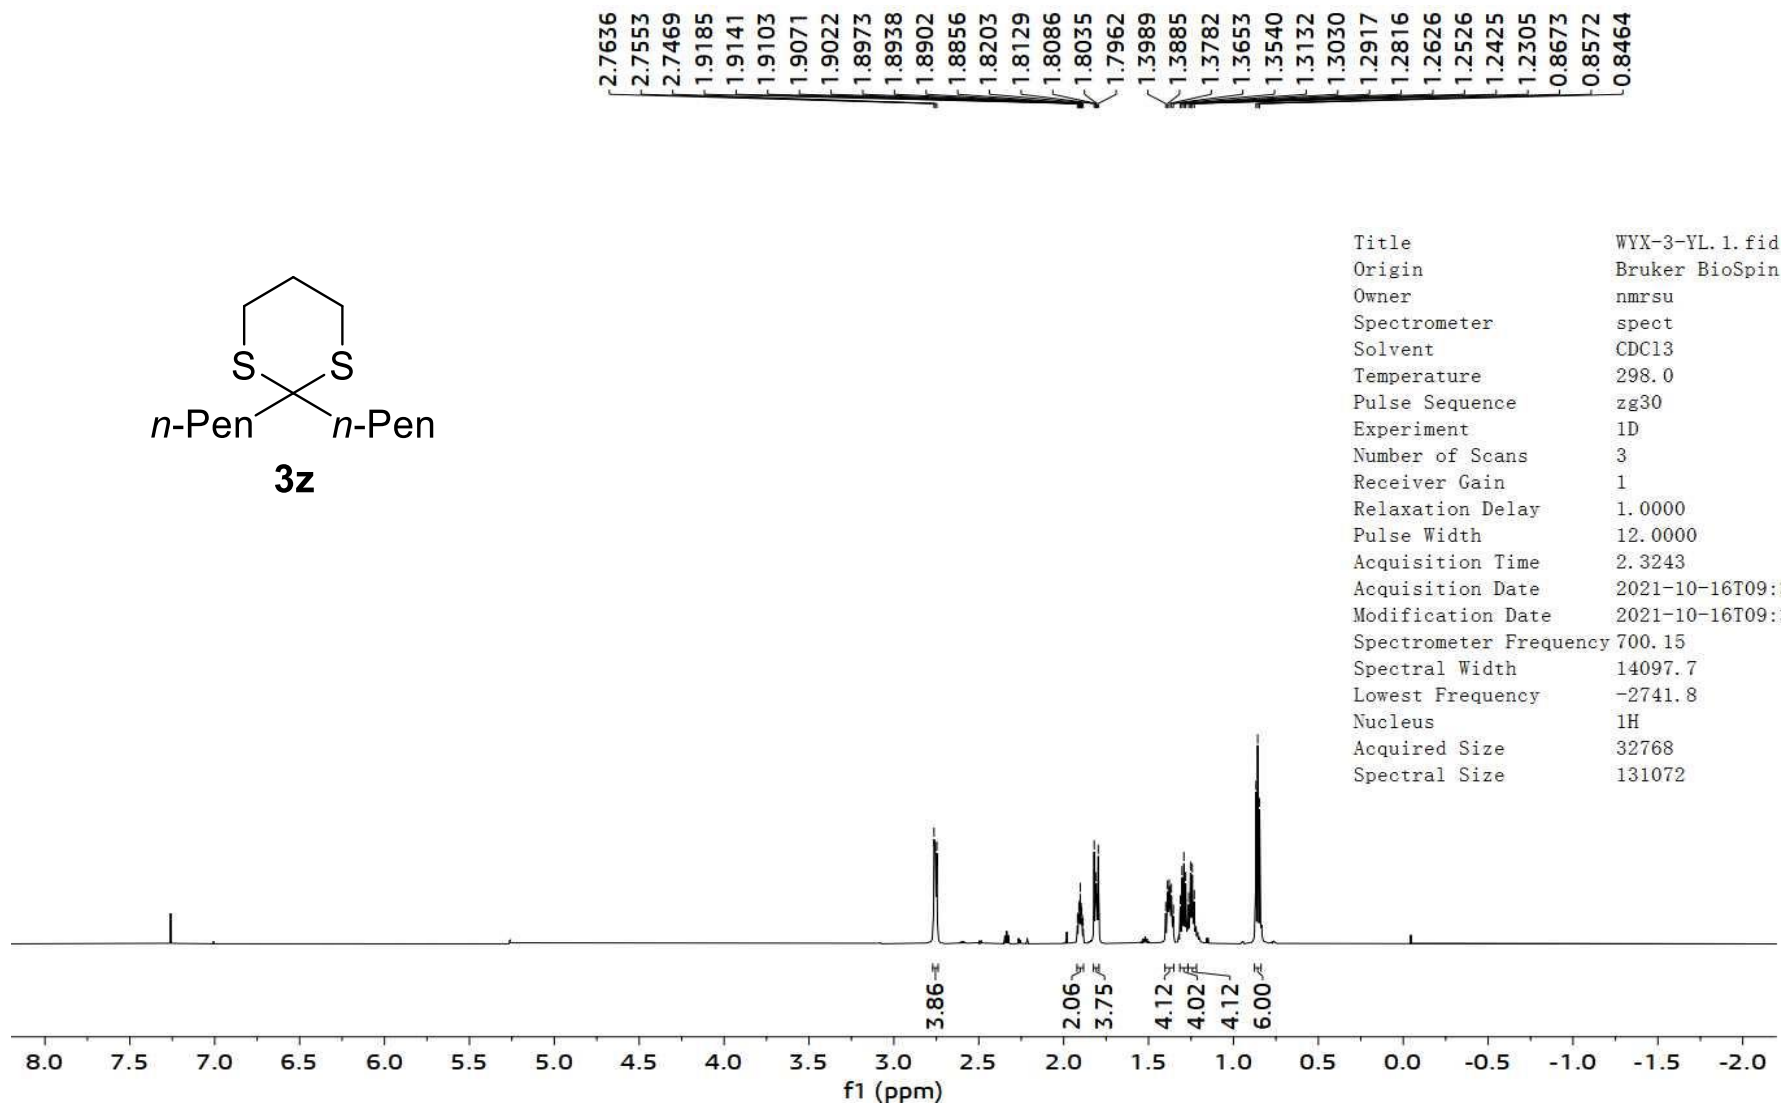

|                        |                     |
|------------------------|---------------------|
| Title                  | WYX-3-YL. 1. fid    |
| Origin                 | Bruker BioSpin GmbH |
| Owner                  | nmsu                |
| Spectrometer           | spect               |
| Solvent                | CDC13               |
| Temperature            | 298.0               |
| Pulse Sequence         | zg30                |
| Experiment             | 1D                  |
| Number of Scans        | 3                   |
| Receiver Gain          | 1                   |
| Relaxation Delay       | 1.0000              |
| Pulse Width            | 12.0000             |
| Acquisition Time       | 2.3243              |
| Acquisition Date       | 2021-10-16T09:30:42 |
| Modification Date      | 2021-10-16T09:30:44 |
| Spectrometer Frequency | 700.15              |
| Spectral Width         | 14097.7             |
| Lowest Frequency       | -2741.8             |
| Nucleus                | <sup>1</sup> H      |
| Acquired Size          | 32768               |
| Spectral Size          | 131072              |

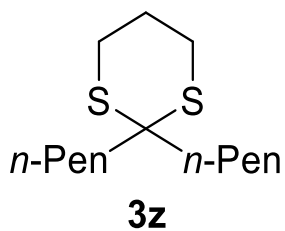

— 52.39  
 / 37.13  
 / 31.04  
 / 25.02  
 / 24.65  
 / 22.73  
 / 21.55  
 — 13.07

|                        |                     |
|------------------------|---------------------|
| Title                  | WYX-3-YL. 2. fid    |
| Origin                 | Bruker BioSpin GmbH |
| Owner                  | nmrsu               |
| Spectrometer           | spect               |
| Solvent                | CDC13               |
| Temperature            | 298.0               |
| Pulse Sequence         | zgpg30              |
| Experiment             | 1D                  |
| Number of Scans        | 26                  |
| Receiver Gain          | 188                 |
| Relaxation Delay       | 2.0000              |
| Pulse Width            | 12.0000             |
| Acquisition Time       | 0.7690              |
| Acquisition Date       | 2021-10-16T09:31:42 |
| Modification Date      | 2021-10-16T09:32:18 |
| Spectrometer Frequency | 176.07              |
| Spectral Width         | 42613.6             |
| Lowest Frequency       | -3870.9             |
| Nucleus                | 13C                 |
| Acquired Size          | 32768               |
| Spectral Size          | 65536               |

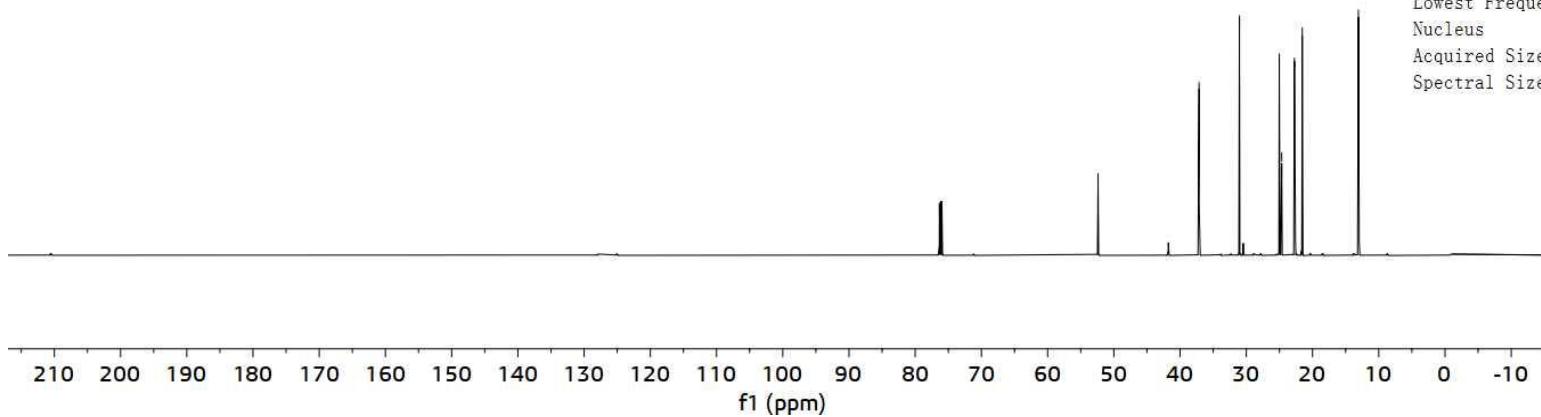

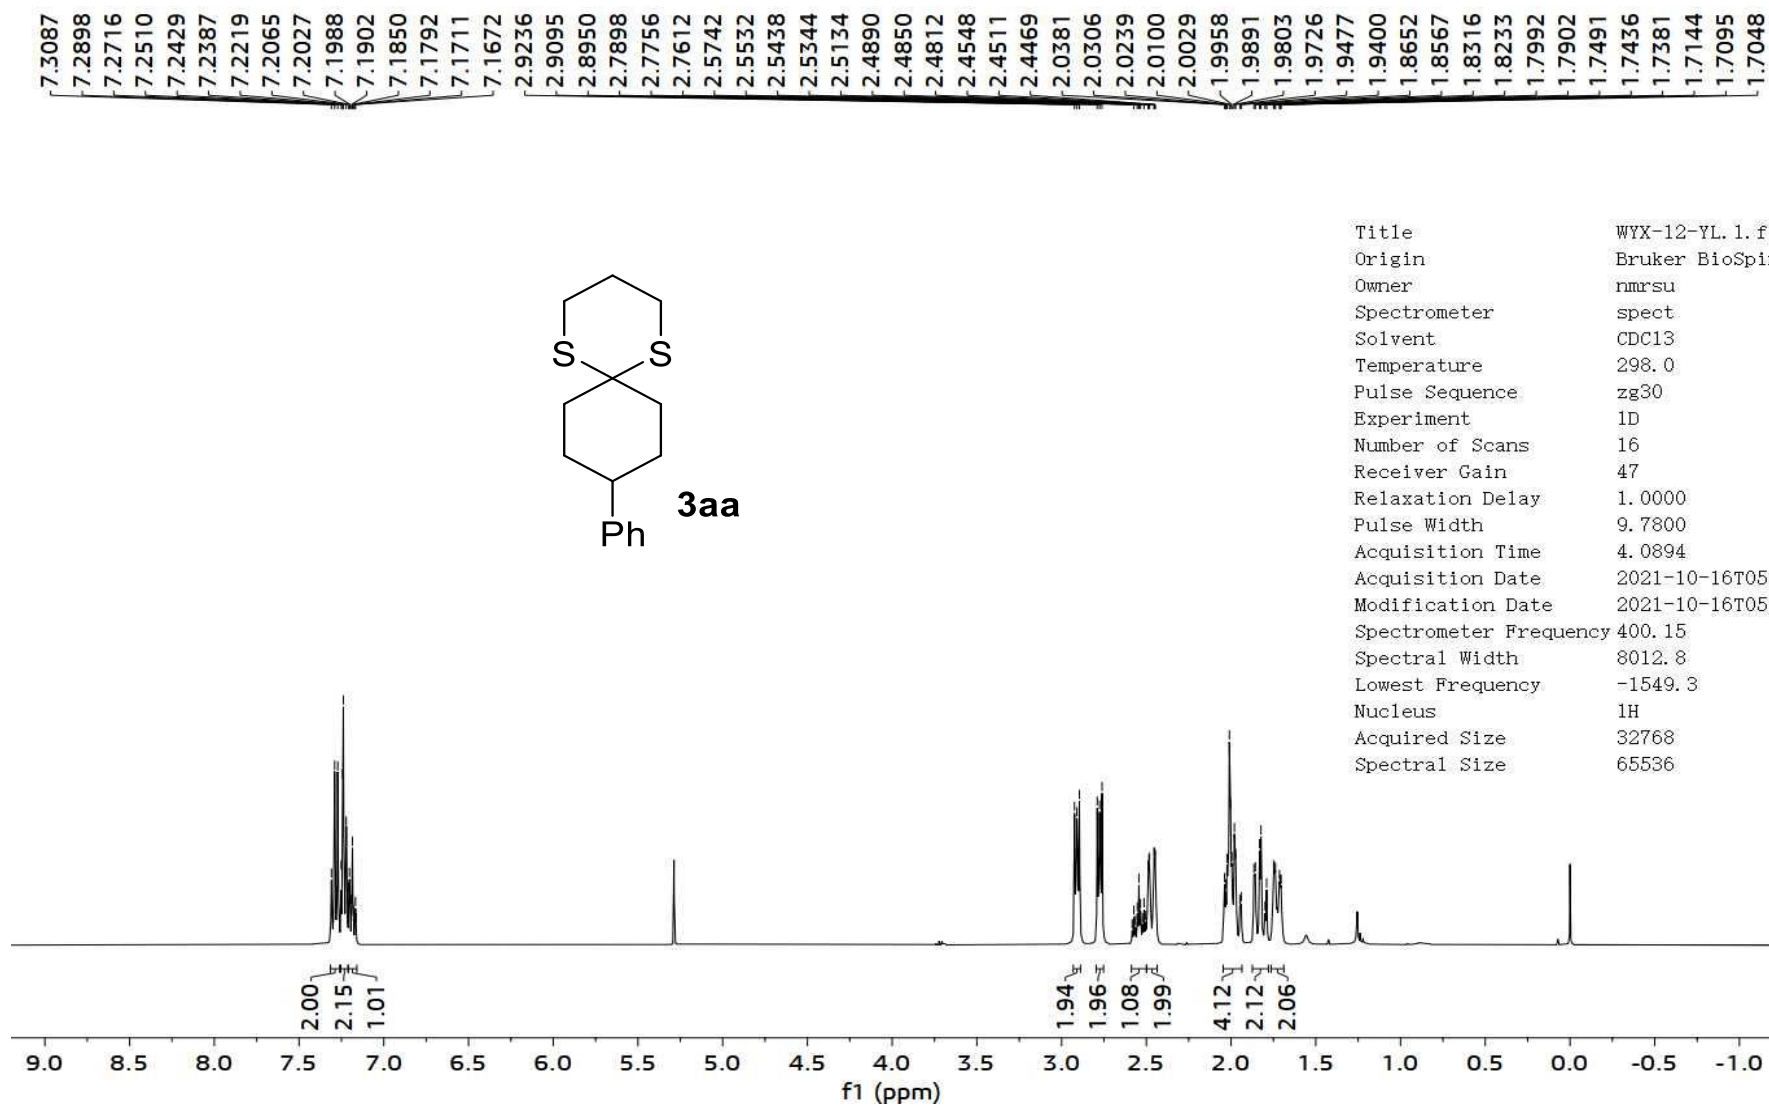

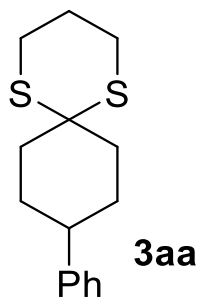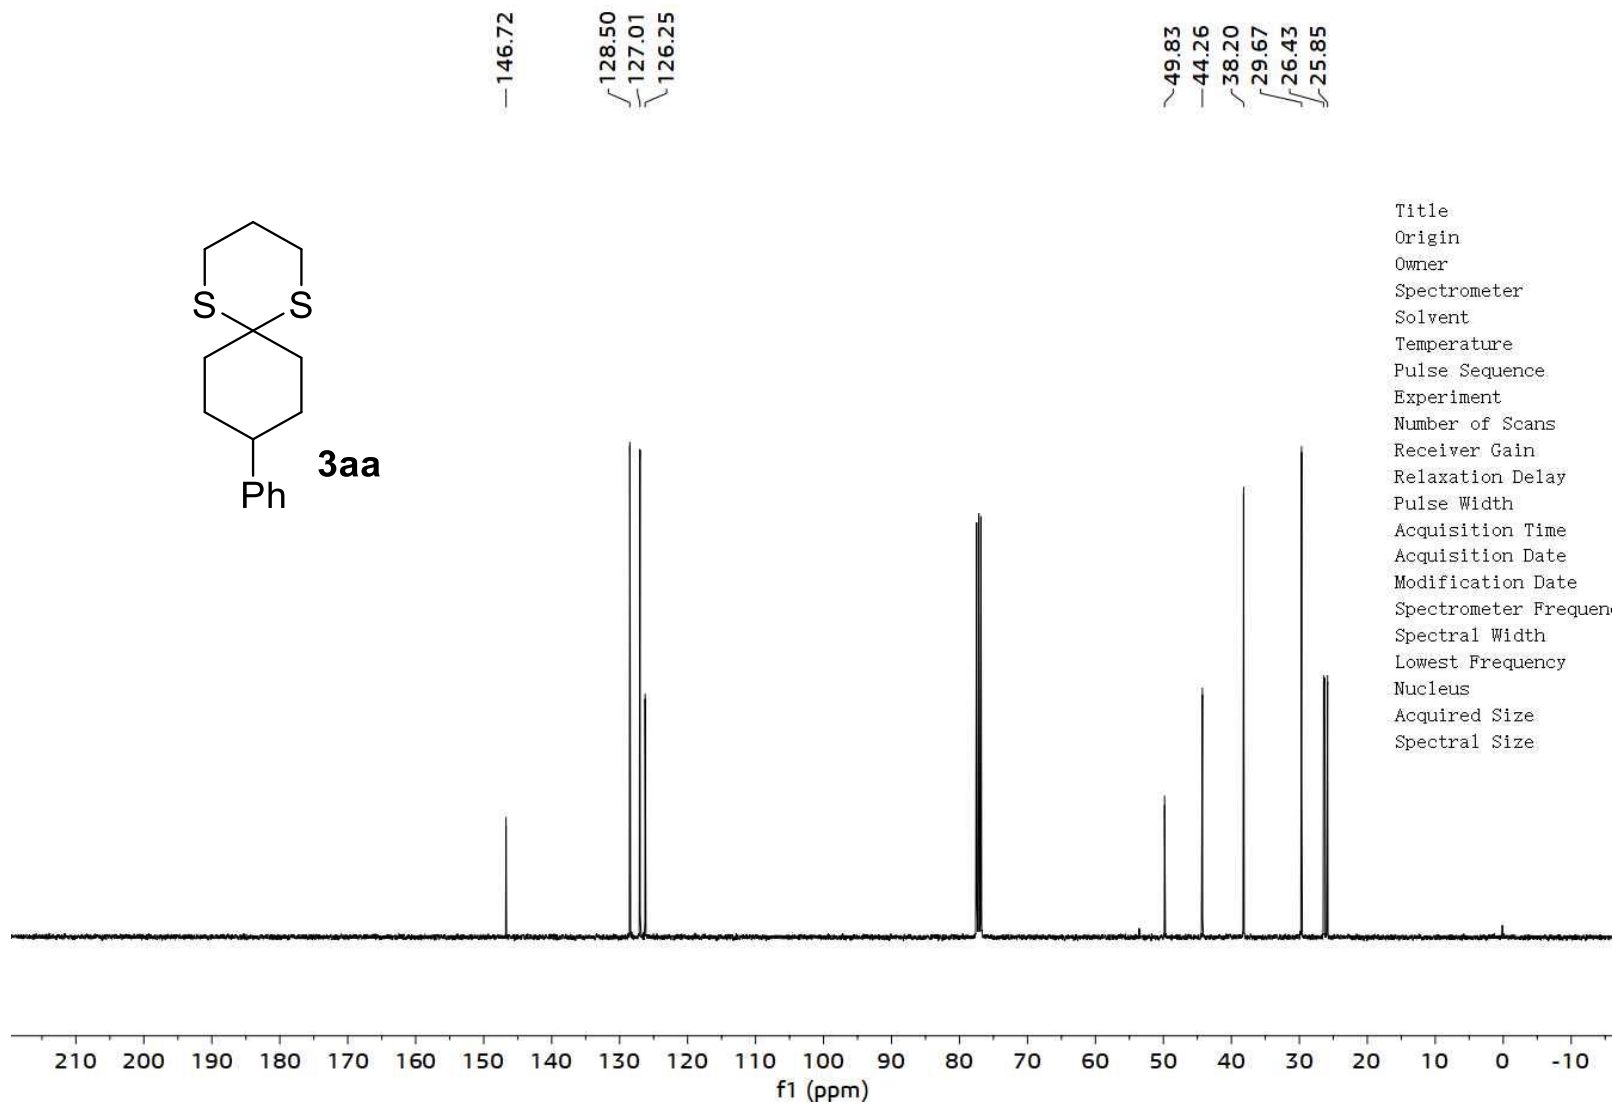

|                        |                     |
|------------------------|---------------------|
| Title                  | WYX-12-YL. 2. fid   |
| Origin                 | Bruker BioSpin GmbH |
| Owner                  | nmrsu               |
| Spectrometer           | spect               |
| Solvent                | CDCl3               |
| Temperature            | 298.0               |
| Pulse Sequence         | zgpg30              |
| Experiment             | 1D                  |
| Number of Scans        | 600                 |
| Receiver Gain          | 202                 |
| Relaxation Delay       | 2.0000              |
| Pulse Width            | 10.5800             |
| Acquisition Time       | 1.3631              |
| Acquisition Date       | 2021-10-16T05:46:08 |
| Modification Date      | 2021-10-16T05:46:10 |
| Spectrometer Frequency | 100.63              |
| Spectral Width         | 24038.5             |
| Lowest Frequency       | -1947.8             |
| Nucleus                | 13C                 |
| Acquired Size          | 32768               |
| Spectral Size          | 65536               |

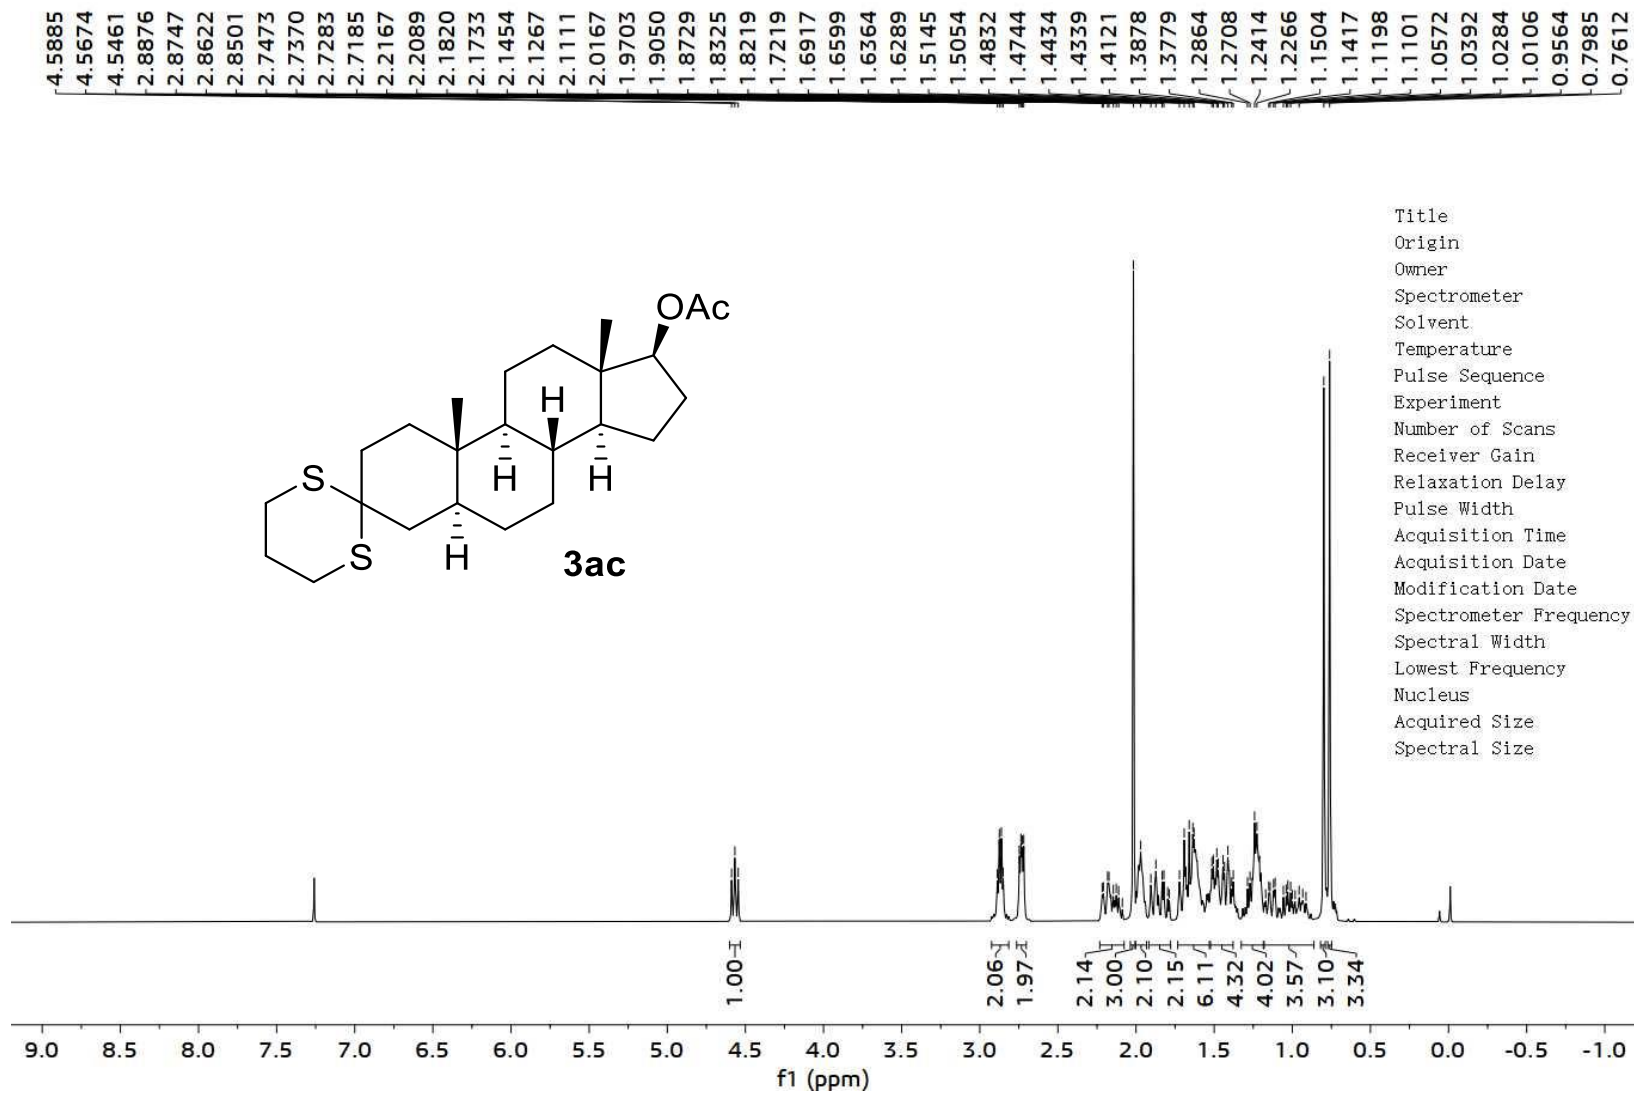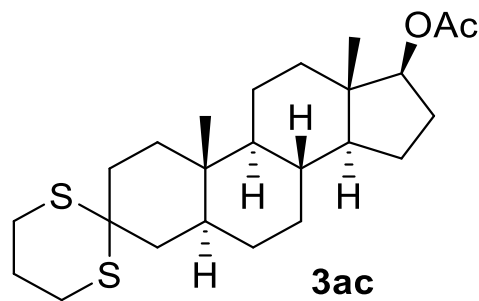

|                        |                     |
|------------------------|---------------------|
| Title                  | WYX-22. 3. 1        |
| Origin                 | Bruker BioSpin GmbH |
| Owner                  | nmrsu               |
| Spectrometer           | spect               |
| Solvent                | CDC13               |
| Temperature            | 303. 0              |
| Pulse Sequence         | zg30                |
| Experiment             | 1D                  |
| Number of Scans        | 6                   |
| Receiver Gain          | 31                  |
| Relaxation Delay       | 1. 0000             |
| Pulse Width            | 9. 7800             |
| Acquisition Time       | 4. 0894             |
| Acquisition Date       | 2021-06-11T18:57:43 |
| Modification Date      | 2021-06-11T18:57:44 |
| Spectrometer Frequency | 400. 15             |
| Spectral Width         | 8012. 8             |
| Lowest Frequency       | -1545. 5            |
| Nucleus                | 1H                  |
| Acquired Size          | 32768               |
| Spectral Size          | 65536               |



-171.30

82.97  
54.09  
50.87  
50.56  
42.76  
41.46  
40.56  
37.02  
36.55  
35.37  
34.55  
33.98  
31.46  
28.10  
27.65  
26.41  
26.35  
26.08  
23.61  
21.29  
20.56  
12.24  
12.03

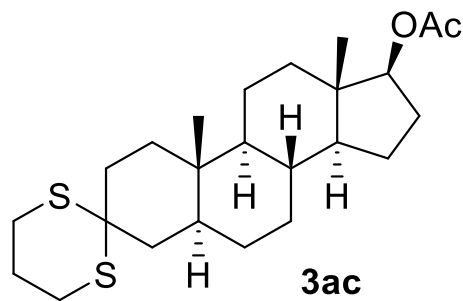

|                        |                     |
|------------------------|---------------------|
| Title                  | WYX-22.4.1          |
| Origin                 | Bruker BioSpin GmbH |
| Owner                  | nmrsu               |
| Spectrometer           | spect               |
| Solvent                | CDC13               |
| Temperature            | 303.0               |
| Pulse Sequence         | zgpg30              |
| Experiment             | 1D                  |
| Number of Scans        | 1024                |
| Receiver Gain          | 202                 |
| Relaxation Delay       | 2.0000              |
| Pulse Width            | 10.5800             |
| Acquisition Time       | 1.3631              |
| Acquisition Date       | 2021-06-11T19:57:17 |
| Modification Date      | 2021-06-11T19:57:18 |
| Spectrometer Frequency | 100.62              |
| Spectral Width         | 24038.5             |
| Lowest Frequency       | -1945.1             |
| Nucleus                | 13C                 |
| Acquired Size          | 32768               |
| Spectral Size          | 65536               |

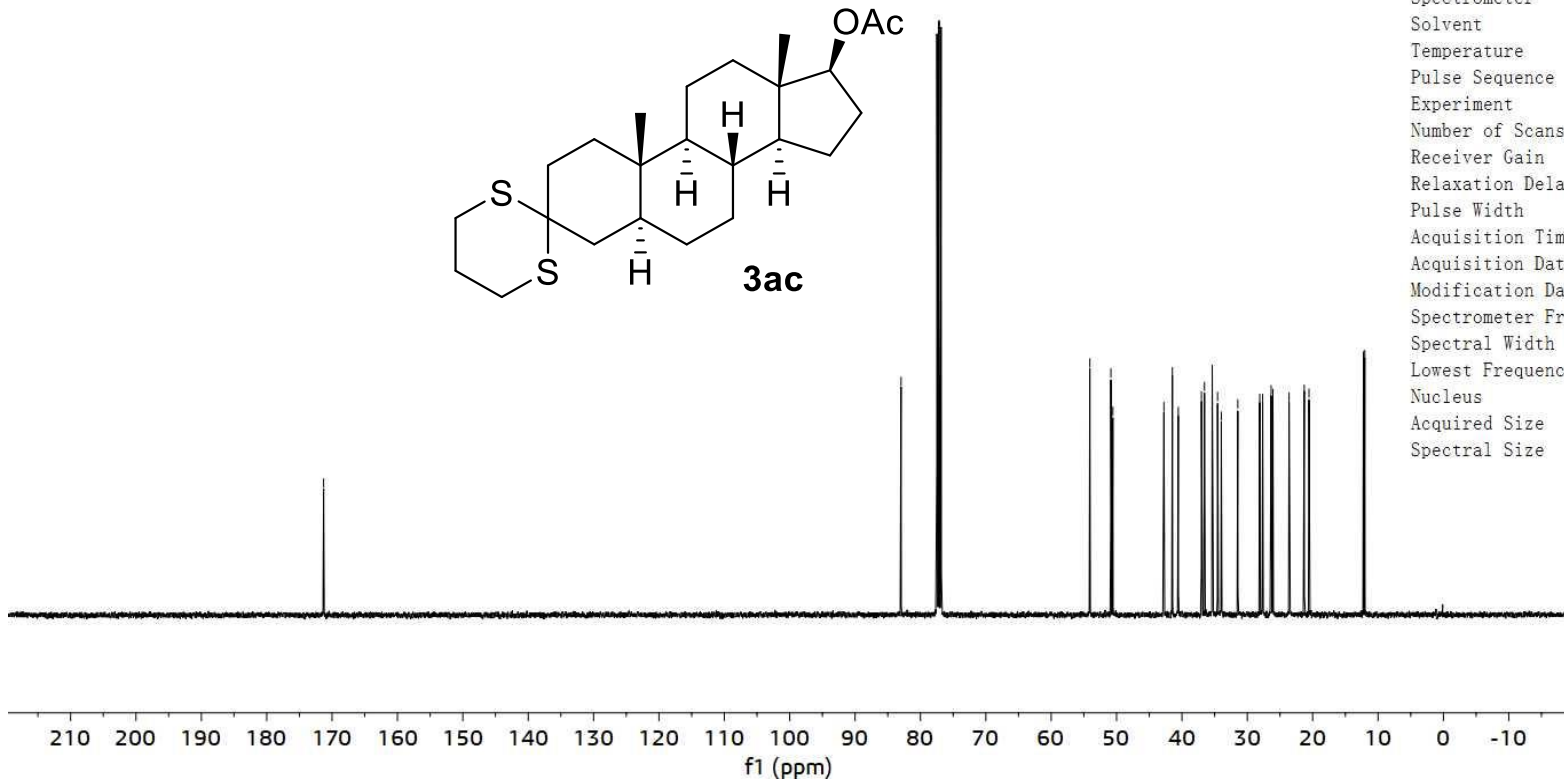

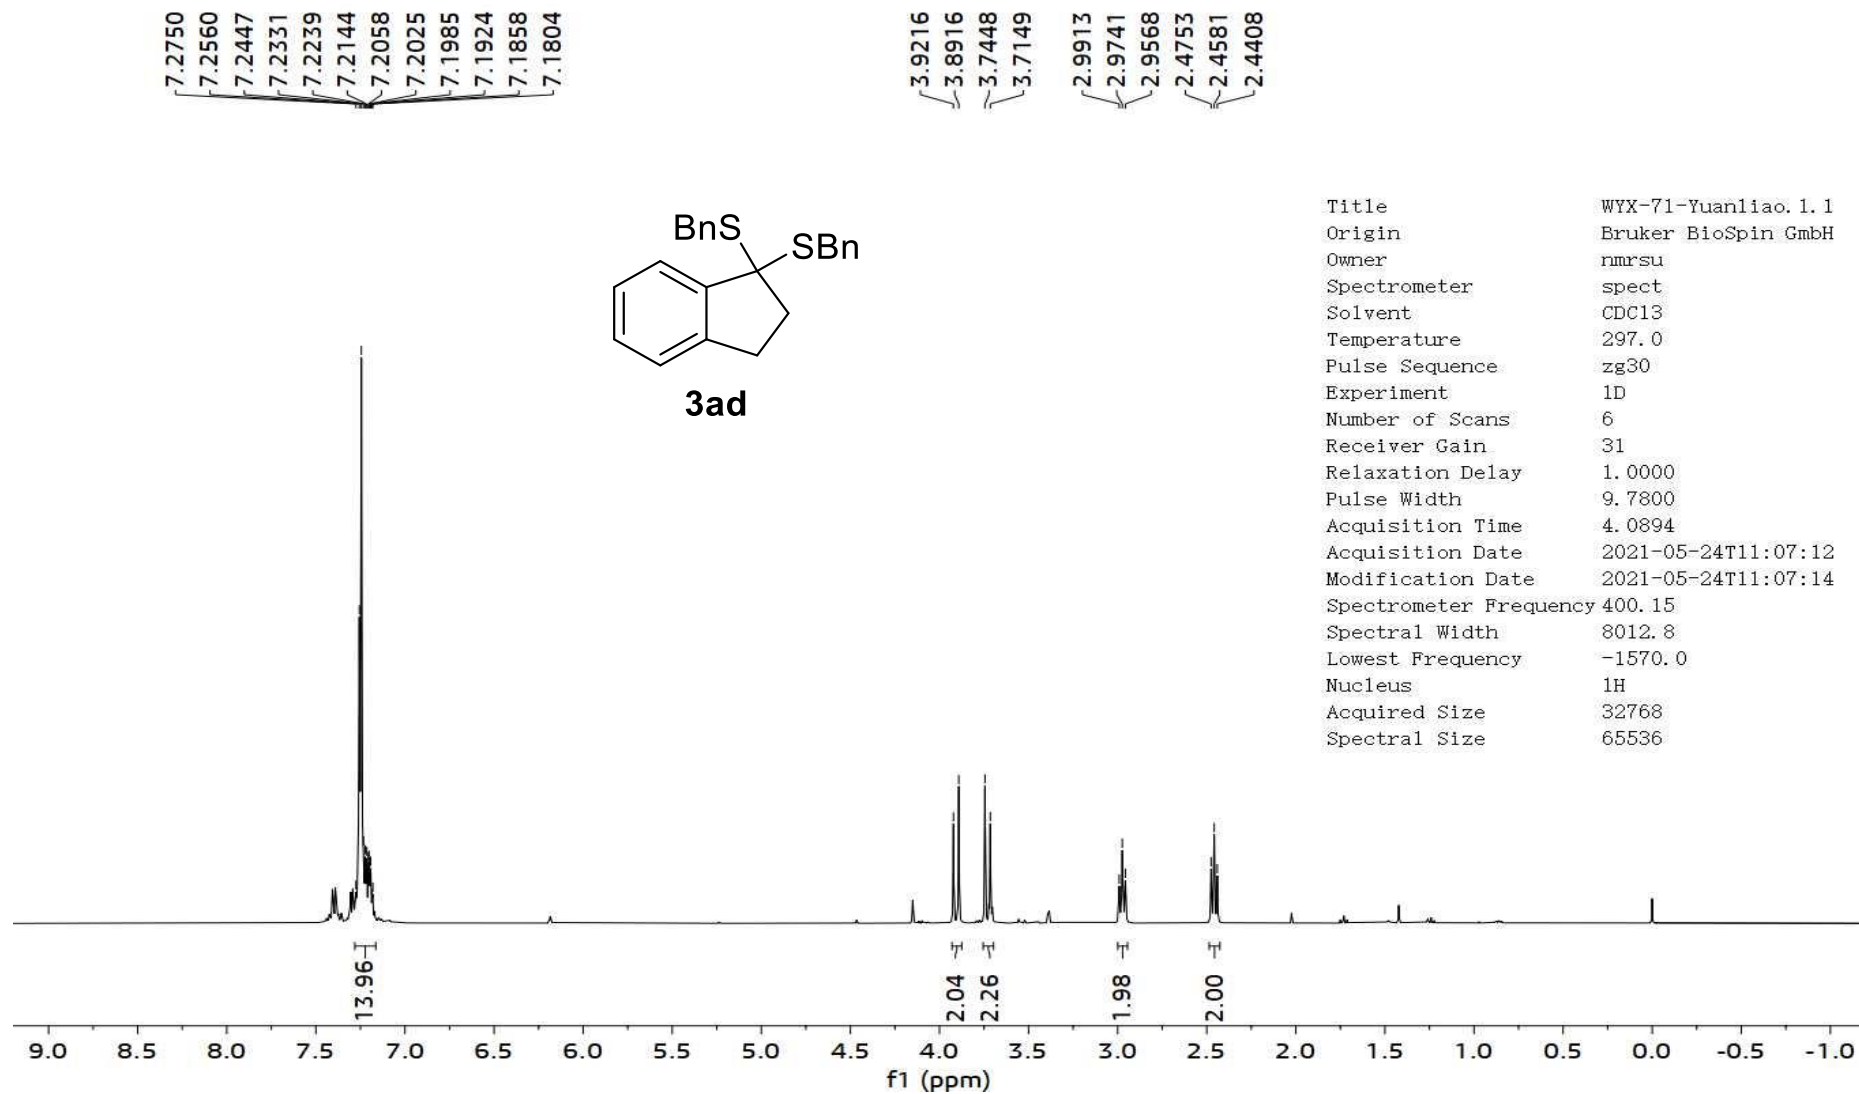

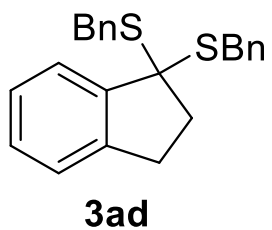

144.01  
 142.75  
 137.42  
 129.33  
 128.58  
 128.38  
 127.09  
 126.45  
 125.53  
 123.87

—67.66

43.06  
 35.97  
 30.63

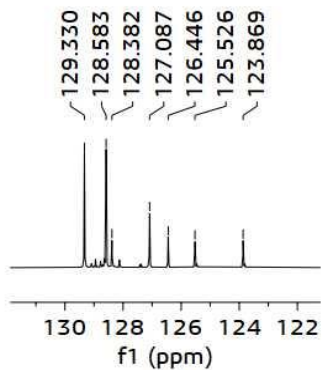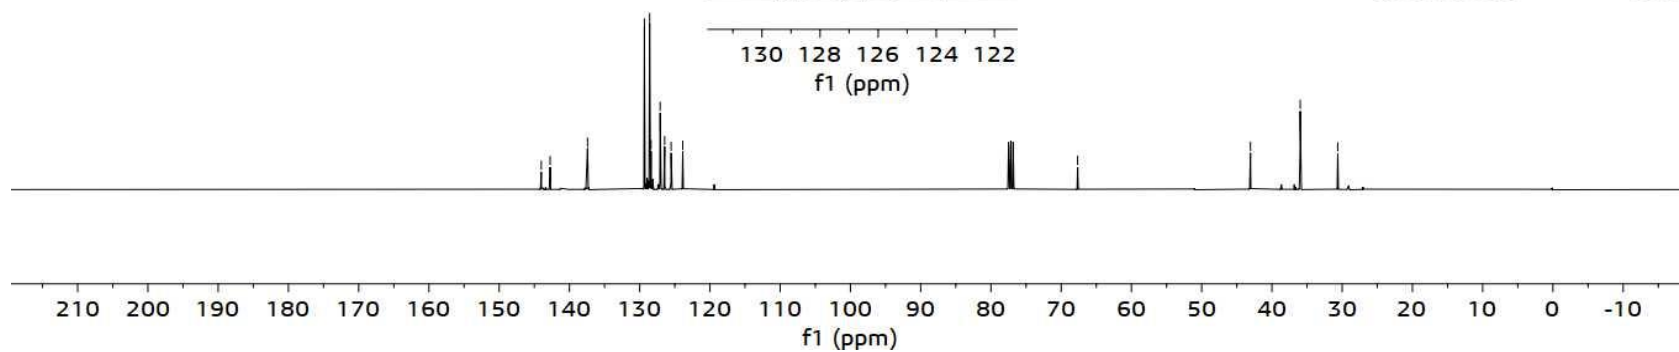

|                        |                      |
|------------------------|----------------------|
| Title                  | WYX-71-Yuanliao. 2.1 |
| Origin                 | Bruker BioSpin GmbH  |
| Owner                  | nmrsu                |
| Spectrometer           | spect                |
| Solvent                | CDC13                |
| Temperature            | 297.6                |
| Pulse Sequence         | zgpg30               |
| Experiment             | 1D                   |
| Number of Scans        | 1024                 |
| Receiver Gain          | 202                  |
| Relaxation Delay       | 2.0000               |
| Pulse Width            | 10.5800              |
| Acquisition Time       | 1.3631               |
| Acquisition Date       | 2021-05-24T12:06:48  |
| Modification Date      | 2021-05-24T12:06:50  |
| Spectrometer Frequency | 100.62               |
| Spectral Width         | 24038.5              |
| Lowest Frequency       | -1953.5              |
| Nucleus                | 13C                  |
| Acquired Size          | 32768                |
| Spectral Size          | 65536                |

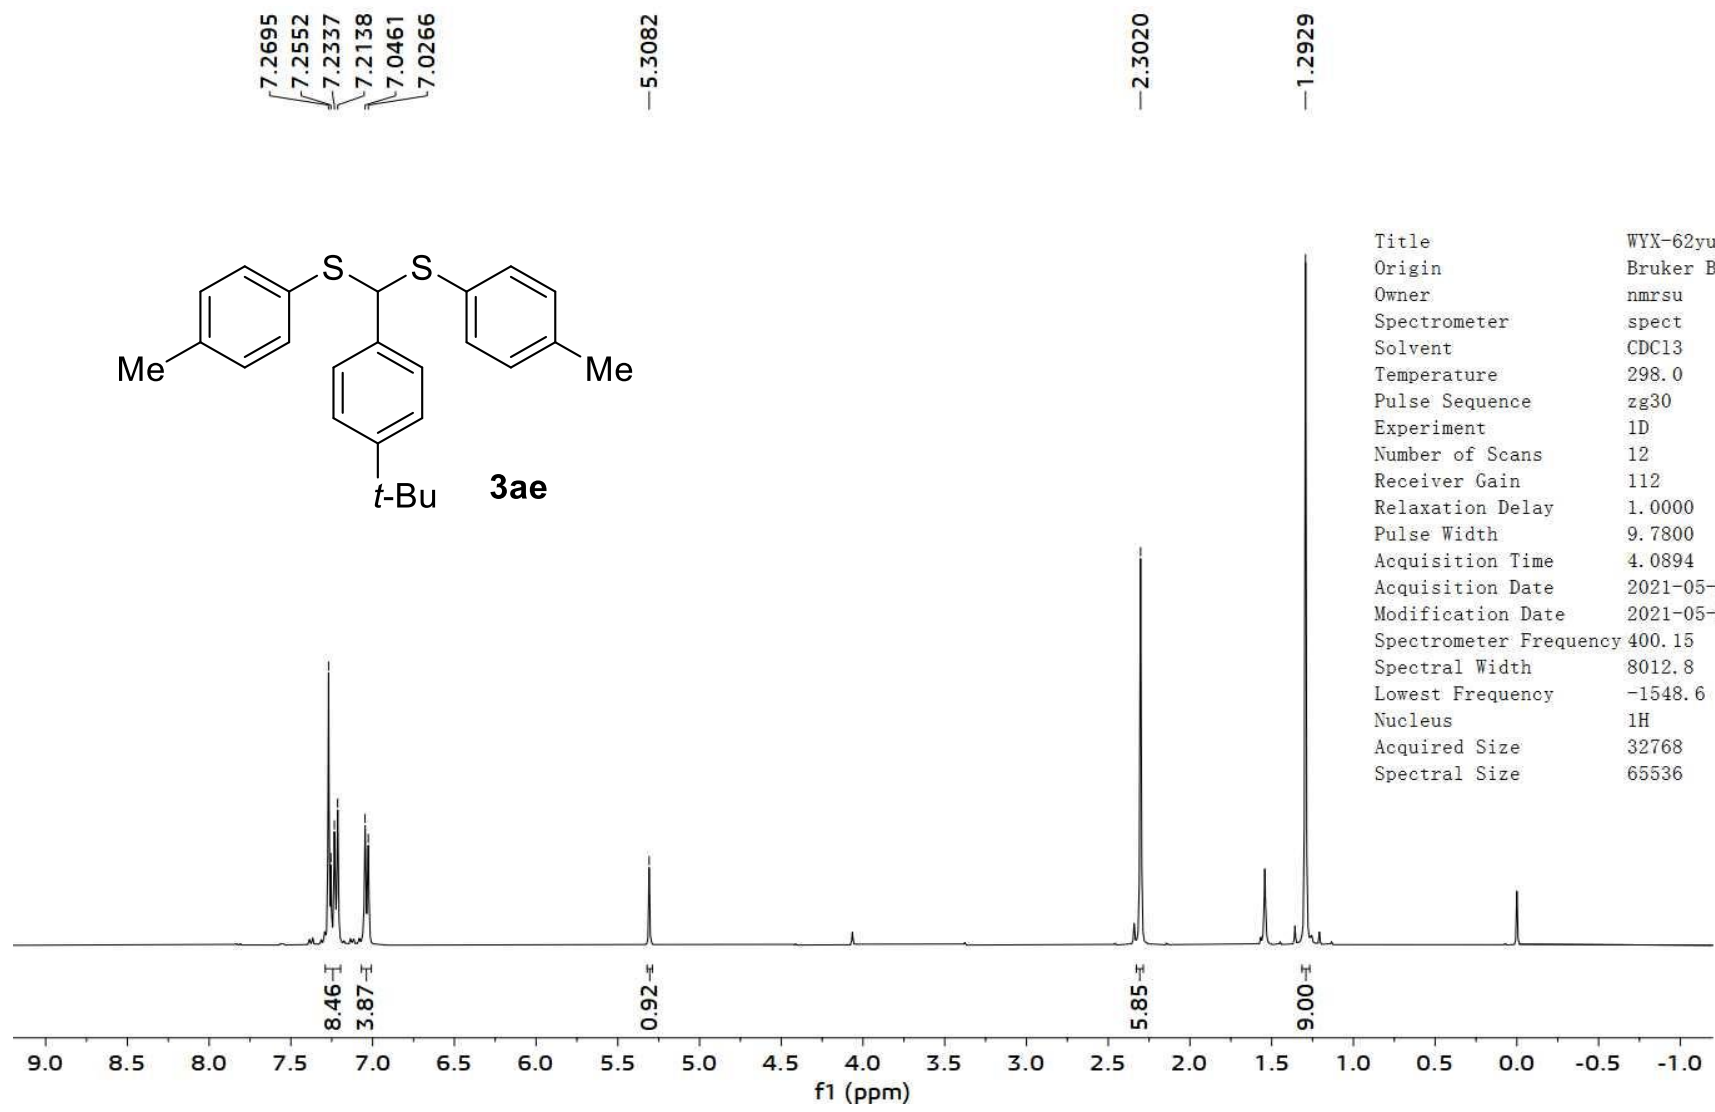

|                        |                     |
|------------------------|---------------------|
| Title                  | WYX-62yuanliao.1.1  |
| Origin                 | Bruker BioSpin GmbH |
| Owner                  | nmrsu               |
| Spectrometer           | spect               |
| Solvent                | CDC13               |
| Temperature            | 298.0               |
| Pulse Sequence         | zg30                |
| Experiment             | 1D                  |
| Number of Scans        | 12                  |
| Receiver Gain          | 112                 |
| Relaxation Delay       | 1.0000              |
| Pulse Width            | 9.7800              |
| Acquisition Time       | 4.0894              |
| Acquisition Date       | 2021-05-17T22:01:29 |
| Modification Date      | 2021-05-17T22:01:28 |
| Spectrometer Frequency | 400.15              |
| Spectral Width         | 8012.8              |
| Lowest Frequency       | -1548.6             |
| Nucleus                | <sup>1</sup> H      |
| Acquired Size          | 32768               |
| Spectral Size          | 65536               |

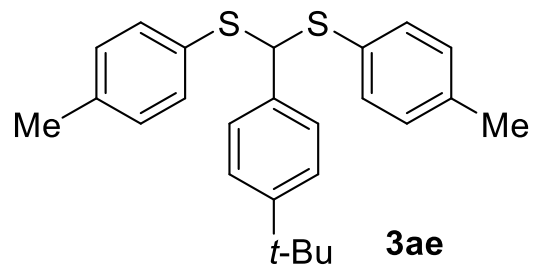

—151.02  
 137.95  
 137.04  
 133.06  
 131.35  
 129.65  
 127.55  
 125.47

—61.28

—34.70  
 —31.45

—21.31

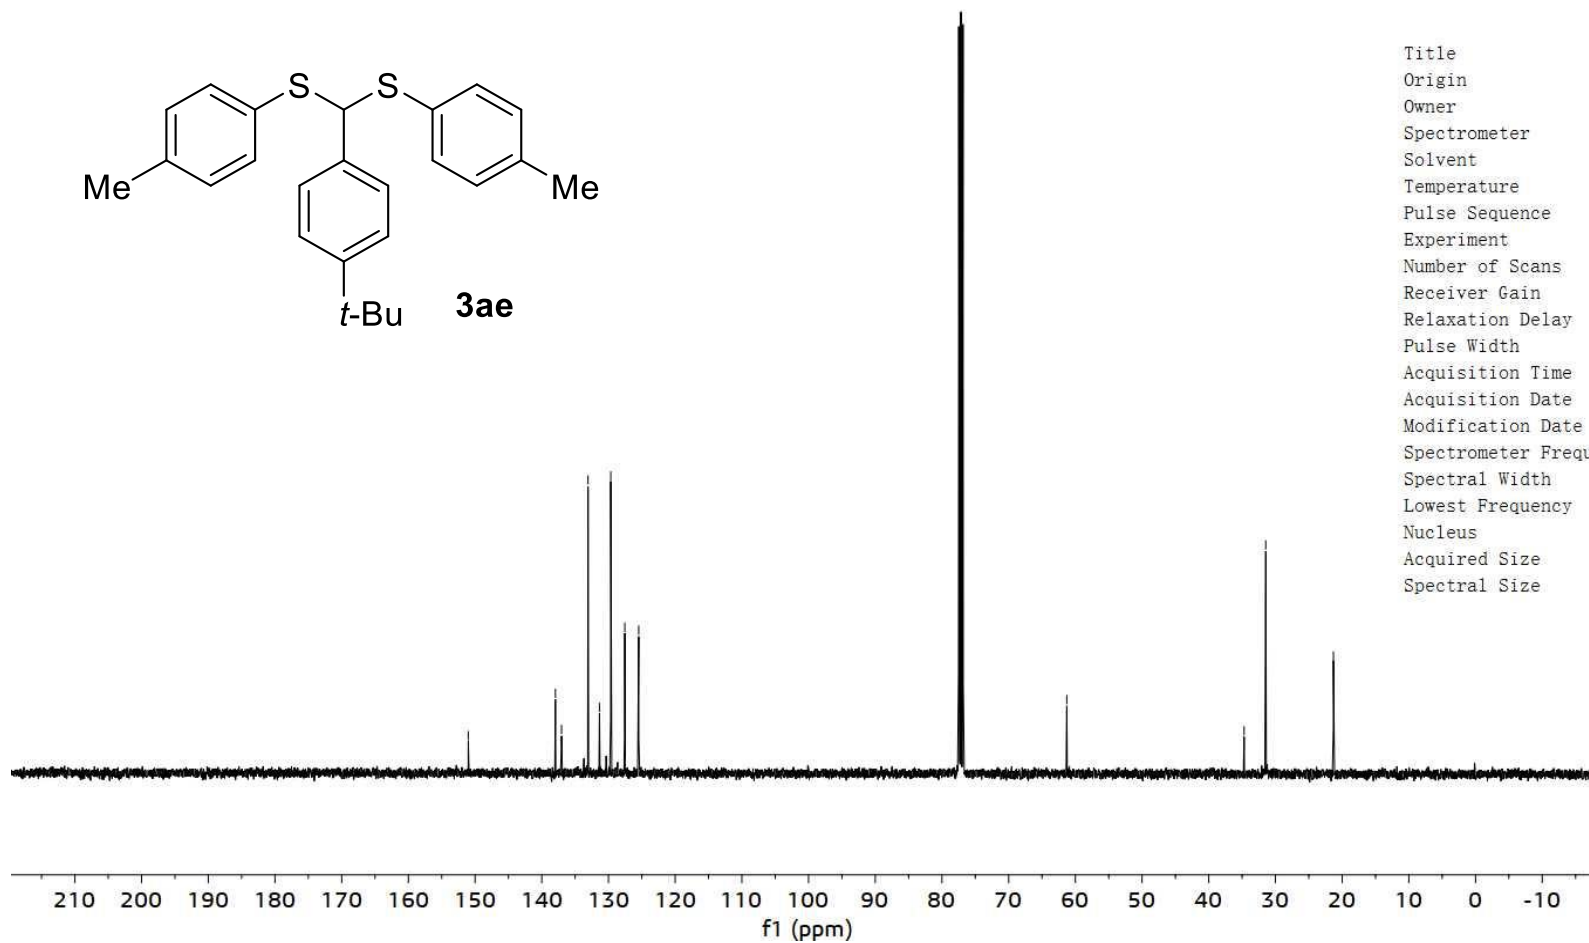

|                        |                      |
|------------------------|----------------------|
| Title                  | WYX-62yuanliao. 2. 1 |
| Origin                 | Bruker BioSpin GmbH  |
| Owner                  | nmsu                 |
| Spectrometer           | spect                |
| Solvent                | CDC13                |
| Temperature            | 298. 0               |
| Pulse Sequence         | zgpg30               |
| Experiment             | 1D                   |
| Number of Scans        | 500                  |
| Receiver Gain          | 202                  |
| Relaxation Delay       | 2. 0000              |
| Pulse Width            | 10. 5800             |
| Acquisition Time       | 1. 3631              |
| Acquisition Date       | 2021-05-17T22:31:12  |
| Modification Date      | 2021-05-17T22:31:13  |
| Spectrometer Frequency | 100. 62              |
| Spectral Width         | 24038. 5             |
| Lowest Frequency       | -1944. 7             |
| Nucleus                | 13C                  |
| Acquired Size          | 32768                |
| Spectral Size          | 65536                |

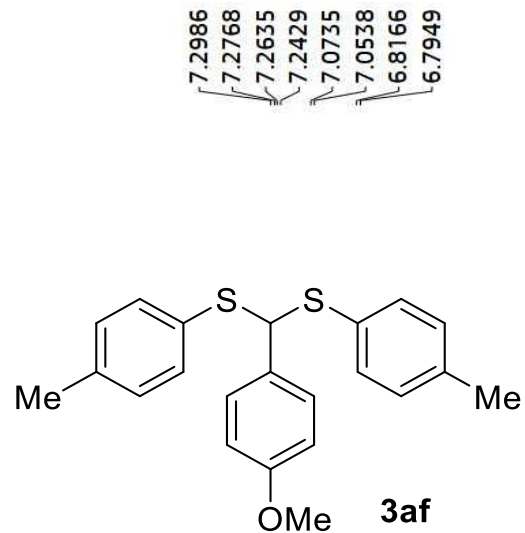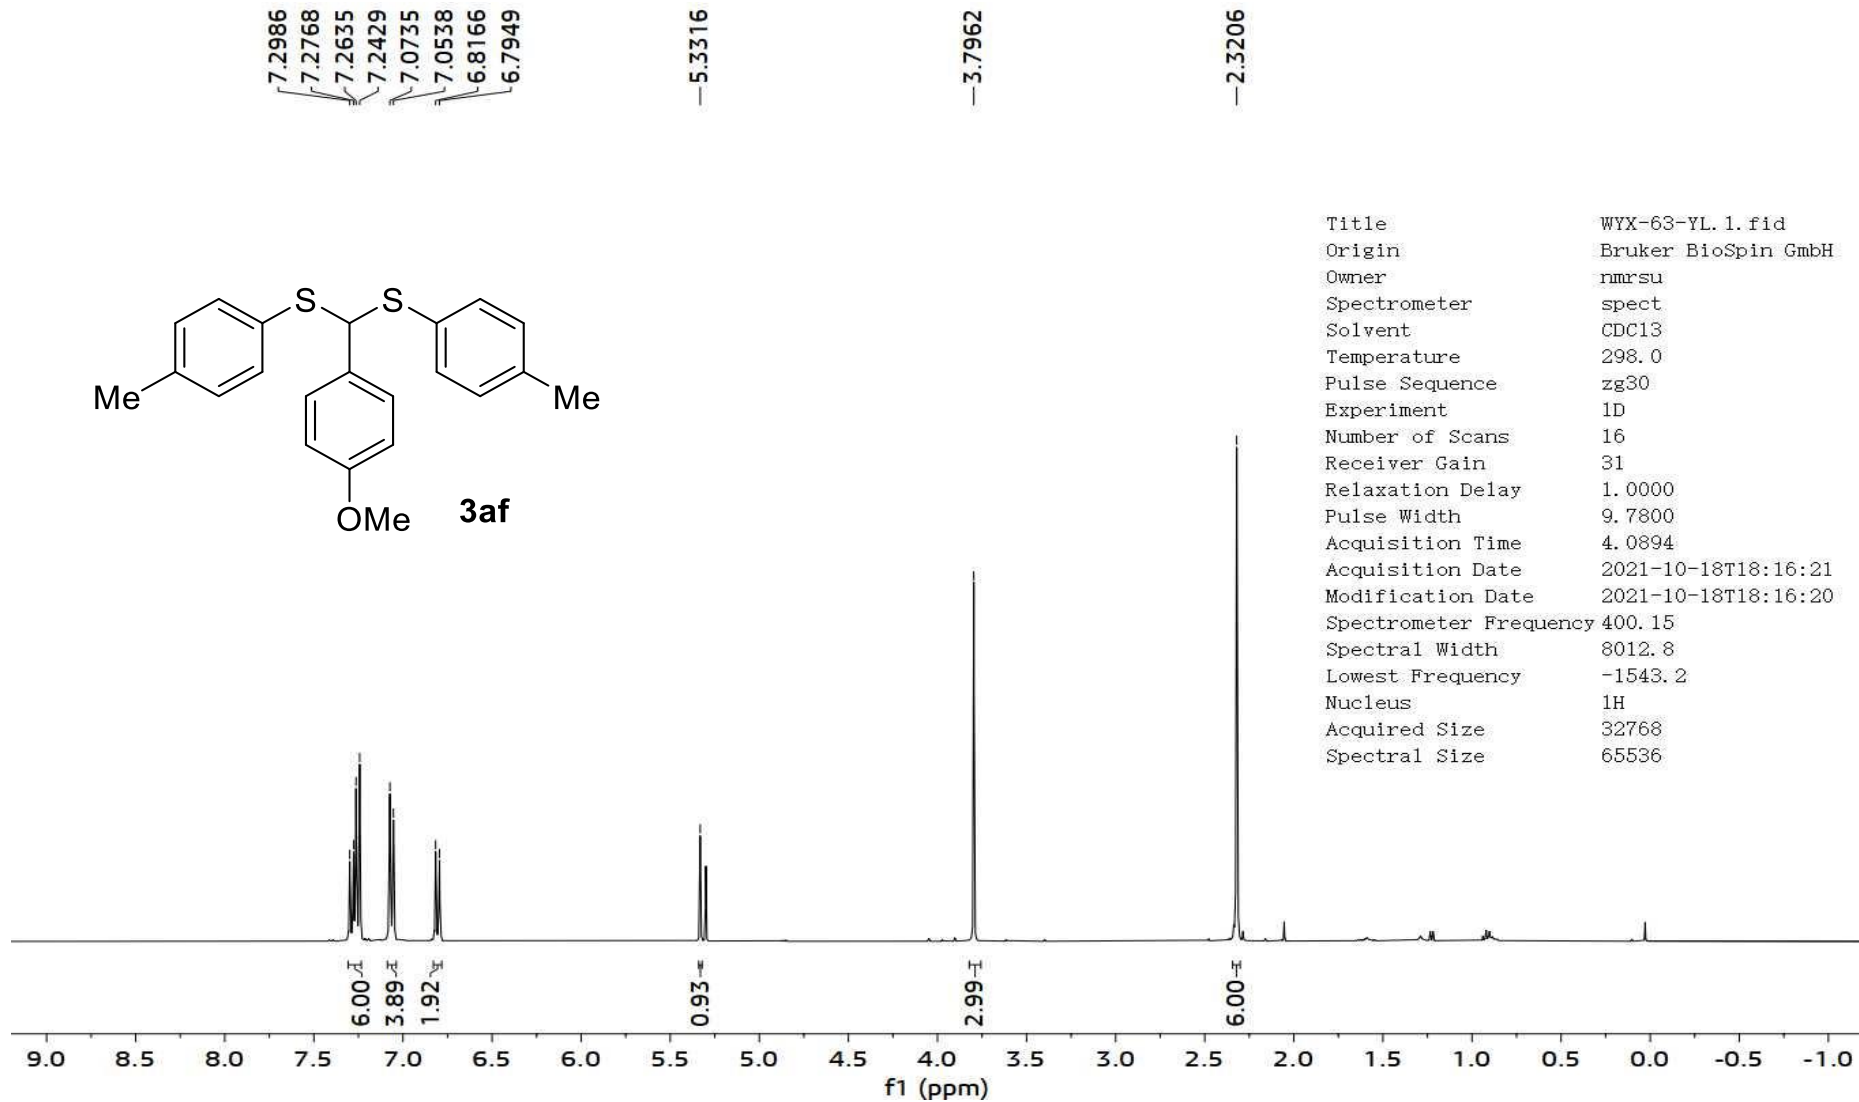

|                        |                     |
|------------------------|---------------------|
| Title                  | WYX-63-YL.1.fid     |
| Origin                 | Bruker BioSpin GmbH |
| Owner                  | nmrsu               |
| Spectrometer           | spect               |
| Solvent                | CDCl3               |
| Temperature            | 298.0               |
| Pulse Sequence         | zg30                |
| Experiment             | 1D                  |
| Number of Scans        | 16                  |
| Receiver Gain          | 31                  |
| Relaxation Delay       | 1.0000              |
| Pulse Width            | 9.7800              |
| Acquisition Time       | 4.0894              |
| Acquisition Date       | 2021-10-18T18:16:21 |
| Modification Date      | 2021-10-18T18:16:20 |
| Spectrometer Frequency | 400.15              |
| Spectral Width         | 8012.8              |
| Lowest Frequency       | -1543.2             |
| Nucleus                | 1H                  |
| Acquired Size          | 32768               |
| Spectral Size          | 65536               |

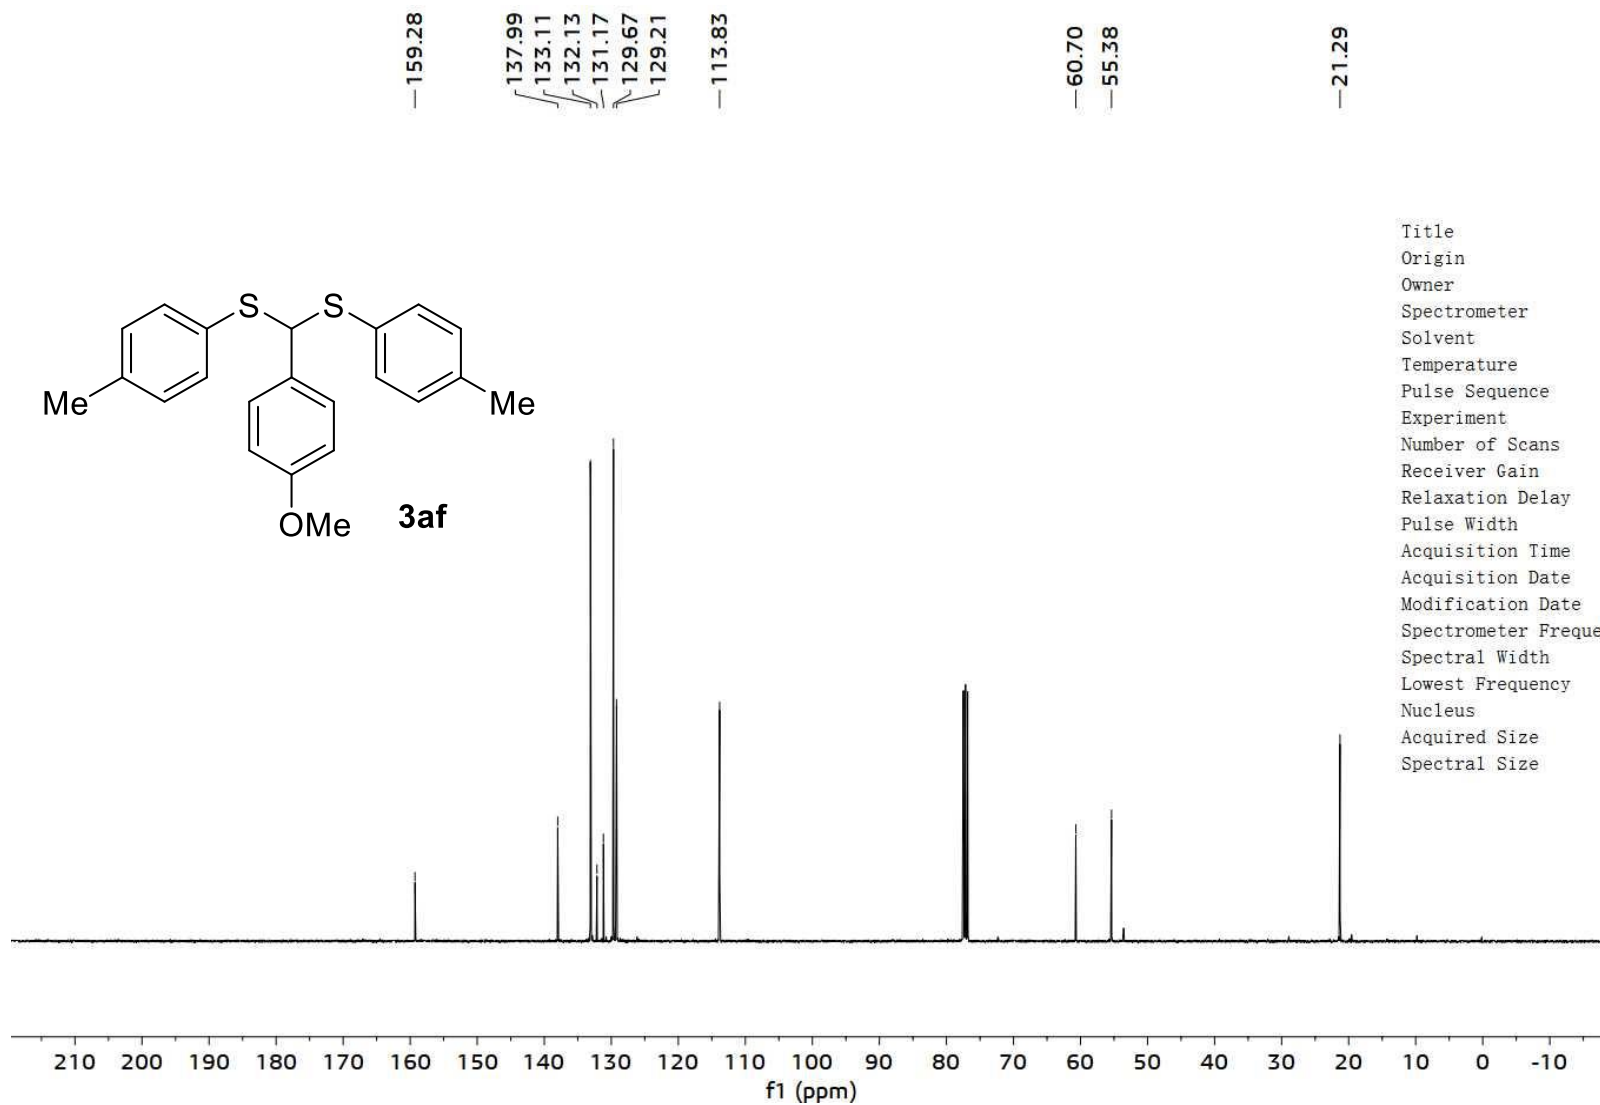

|                        |                     |
|------------------------|---------------------|
| Title                  | WYX-63-YL. 2. fid   |
| Origin                 | Bruker BioSpin GmbH |
| Owner                  | nmsu                |
| Spectrometer           | spect               |
| Solvent                | CDC13               |
| Temperature            | 298.0               |
| Pulse Sequence         | zgpg30              |
| Experiment             | 1D                  |
| Number of Scans        | 700                 |
| Receiver Gain          | 202                 |
| Relaxation Delay       | 2.0000              |
| Pulse Width            | 10.5800             |
| Acquisition Time       | 1.3631              |
| Acquisition Date       | 2021-10-18T18:57:27 |
| Modification Date      | 2021-10-18T18:57:26 |
| Spectrometer Frequency | 100.63              |
| Spectral Width         | 24038.5             |
| Lowest Frequency       | -1948.1             |
| Nucleus                | 13C                 |
| Acquired Size          | 32768               |
| Spectral Size          | 65536               |

7.6575  
7.6398  
7.6171  
7.5963  
7.5471  
7.5263  
7.4682  
7.4497  
7.4304  
7.3733  
7.3551  
7.3366  
7.3072  
7.2871  
7.1244  
7.1045  
—6.0019

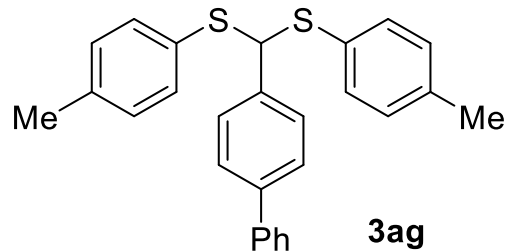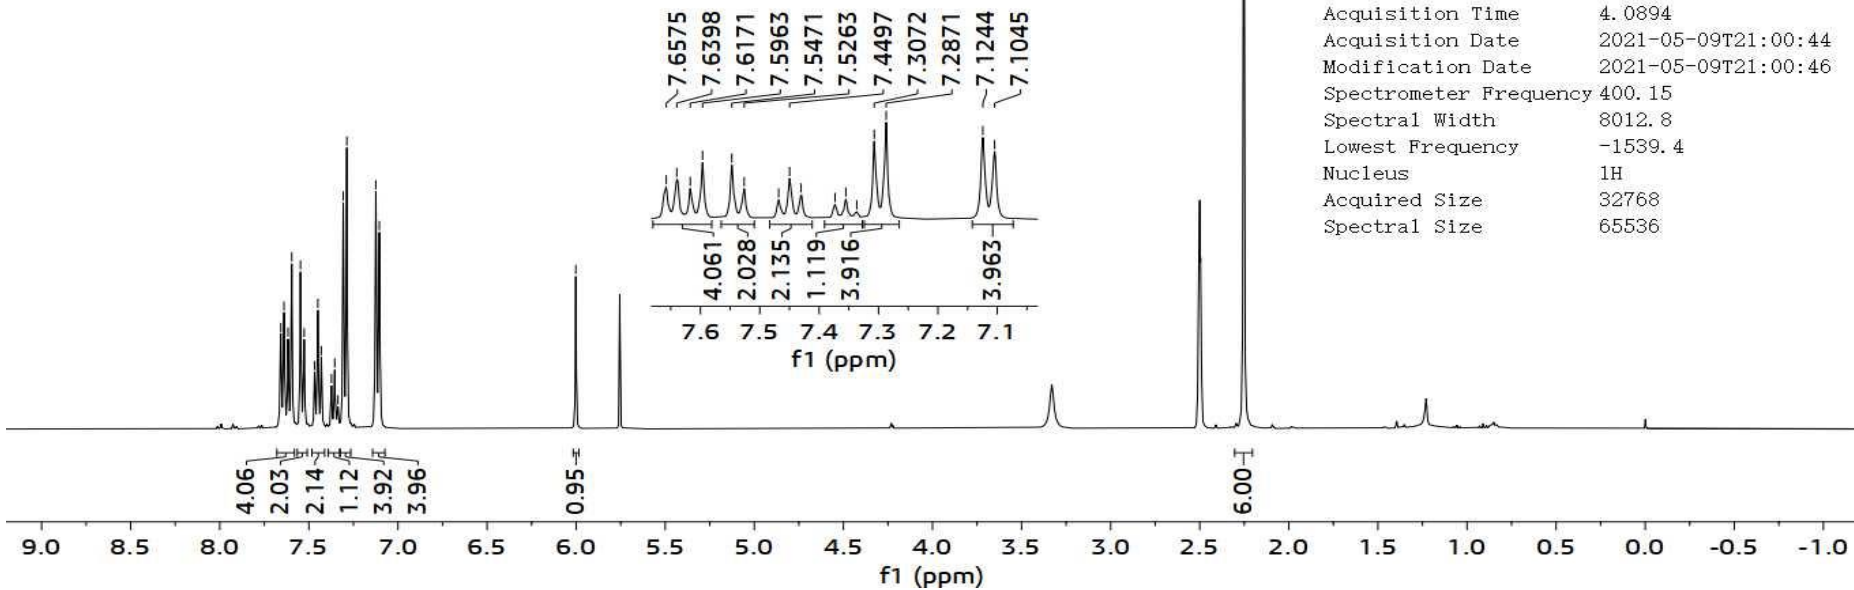

|                        |                     |
|------------------------|---------------------|
| Title                  | WYX-61-yuanliao.1.1 |
| Origin                 | Bruker BioSpin GmbH |
| Owner                  | nmrsu               |
| Spectrometer           | spect               |
| Solvent                | DMSO                |
| Temperature            | 298.0               |
| Pulse Sequence         | zg30                |
| Experiment             | 1D                  |
| Number of Scans        | 6                   |
| Receiver Gain          | 127                 |
| Relaxation Delay       | 1.0000              |
| Pulse Width            | 9.7800              |
| Acquisition Time       | 4.0894              |
| Acquisition Date       | 2021-05-09T21:00:44 |
| Modification Date      | 2021-05-09T21:00:46 |
| Spectrometer Frequency | 400.15              |
| Spectral Width         | 8012.8              |
| Lowest Frequency       | -1539.4             |
| Nucleus                | 1H                  |
| Acquired Size          | 32768               |
| Spectral Size          | 65536               |



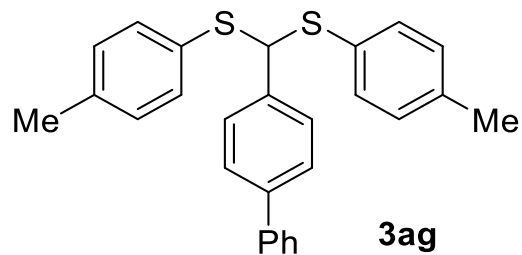

139.60  
139.37  
138.54  
137.17  
131.52  
130.47  
129.61  
128.92  
128.40  
127.58  
126.57

—57.12

—20.62

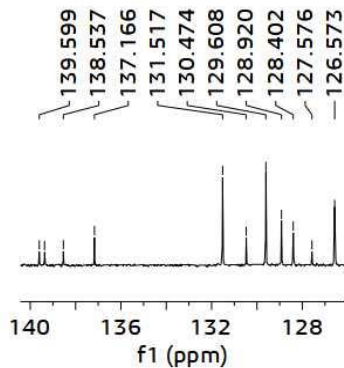

|                        |                       |
|------------------------|-----------------------|
| Title                  | WYX-61-yuanliao. 2. 1 |
| Origin                 | Bruker BioSpin GmbH   |
| Owner                  | nmrsu                 |
| Spectrometer           | spect                 |
| Solvent                | DMSO                  |
| Temperature            | 298. 0                |
| Pulse Sequence         | zgpg30                |
| Experiment             | 1D                    |
| Number of Scans        | 1024                  |
| Receiver Gain          | 202                   |
| Relaxation Delay       | 2. 0000               |
| Pulse Width            | 10. 5800              |
| Acquisition Time       | 1. 3631               |
| Acquisition Date       | 2021-05-09T22:00:22   |
| Modification Date      | 2021-05-09T22:00:24   |
| Spectrometer Frequency | 100. 62               |
| Spectral Width         | 24038. 5              |
| Lowest Frequency       | -2007. 2              |
| Nucleus                | 13C                   |
| Acquired Size          | 32768                 |
| Spectral Size          | 65536                 |

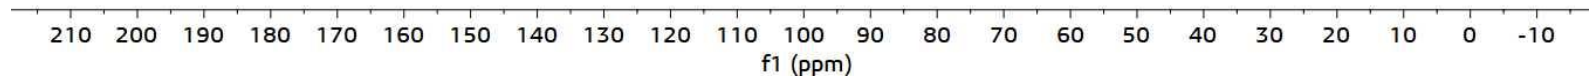

8.6769  
8.6535  
8.3848  
8.3646  
8.3298  
8.3270  
8.3166  
8.3089  
8.2972  
8.2943  
8.2766  
8.2532  
8.2017  
8.1794  
8.1682  
8.1459  
8.1029  
8.0839  
8.0648  
6.4321

4.8312  
4.8176  
4.8042  
3.5713  
3.5569  
3.5539  
3.5390  
3.5242  
3.5130  
3.4970  
2.8395  
2.8225  
2.8059  
2.7900  
2.7724  
2.6922  
2.6752  
2.6587  
2.6422  
2.6254

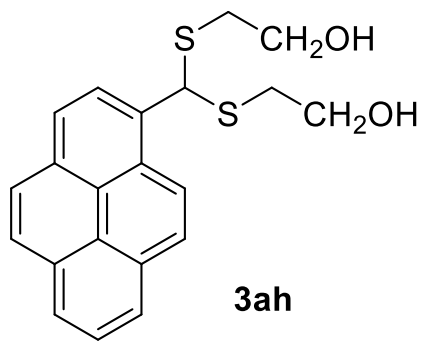

|                        |                     |
|------------------------|---------------------|
| Title                  | Pyr2-2. 1. 1        |
| Origin                 | Bruker BioSpin GmbH |
| Owner                  | nmrsu               |
| Spectrometer           | spect               |
| Solvent                | DMSO                |
| Temperature            | 303.0               |
| Pulse Sequence         | zg30                |
| Experiment             | 1D                  |
| Number of Scans        | 12                  |
| Receiver Gain          | 64                  |
| Relaxation Delay       | 1.0000              |
| Pulse Width            | 9.7800              |
| Acquisition Time       | 4.0894              |
| Acquisition Date       | 2021-06-24T23:24:38 |
| Modification Date      | 2021-06-24T23:24:40 |
| Spectrometer Frequency | 400.15              |
| Spectral Width         | 8012.8              |
| Lowest Frequency       | -1539.6             |
| Nucleus                | <sup>1</sup> H      |
| Acquired Size          | 32768               |
| Spectral Size          | 65536               |

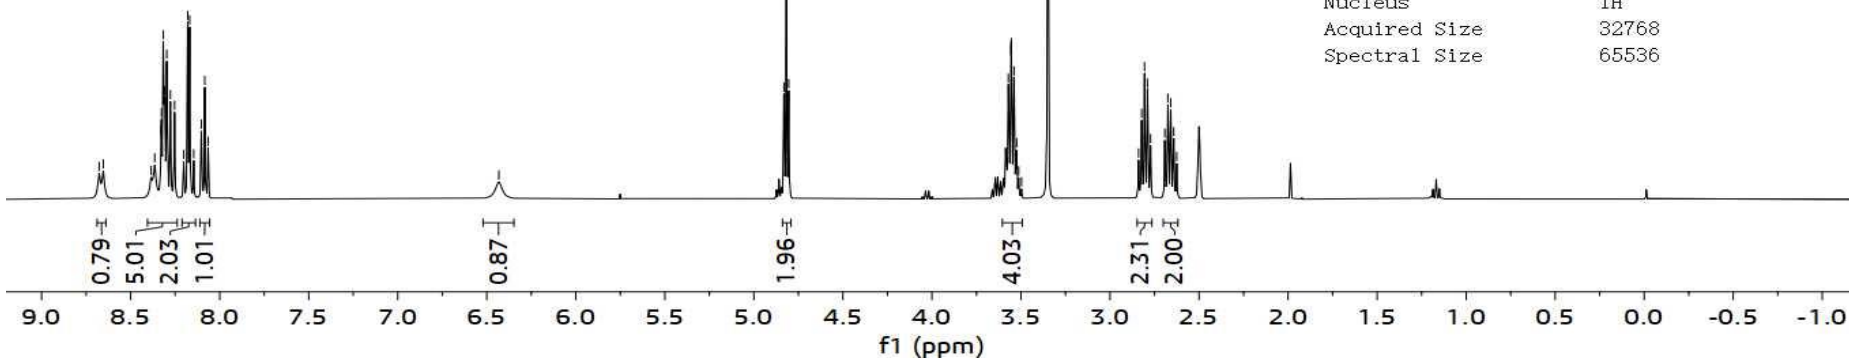

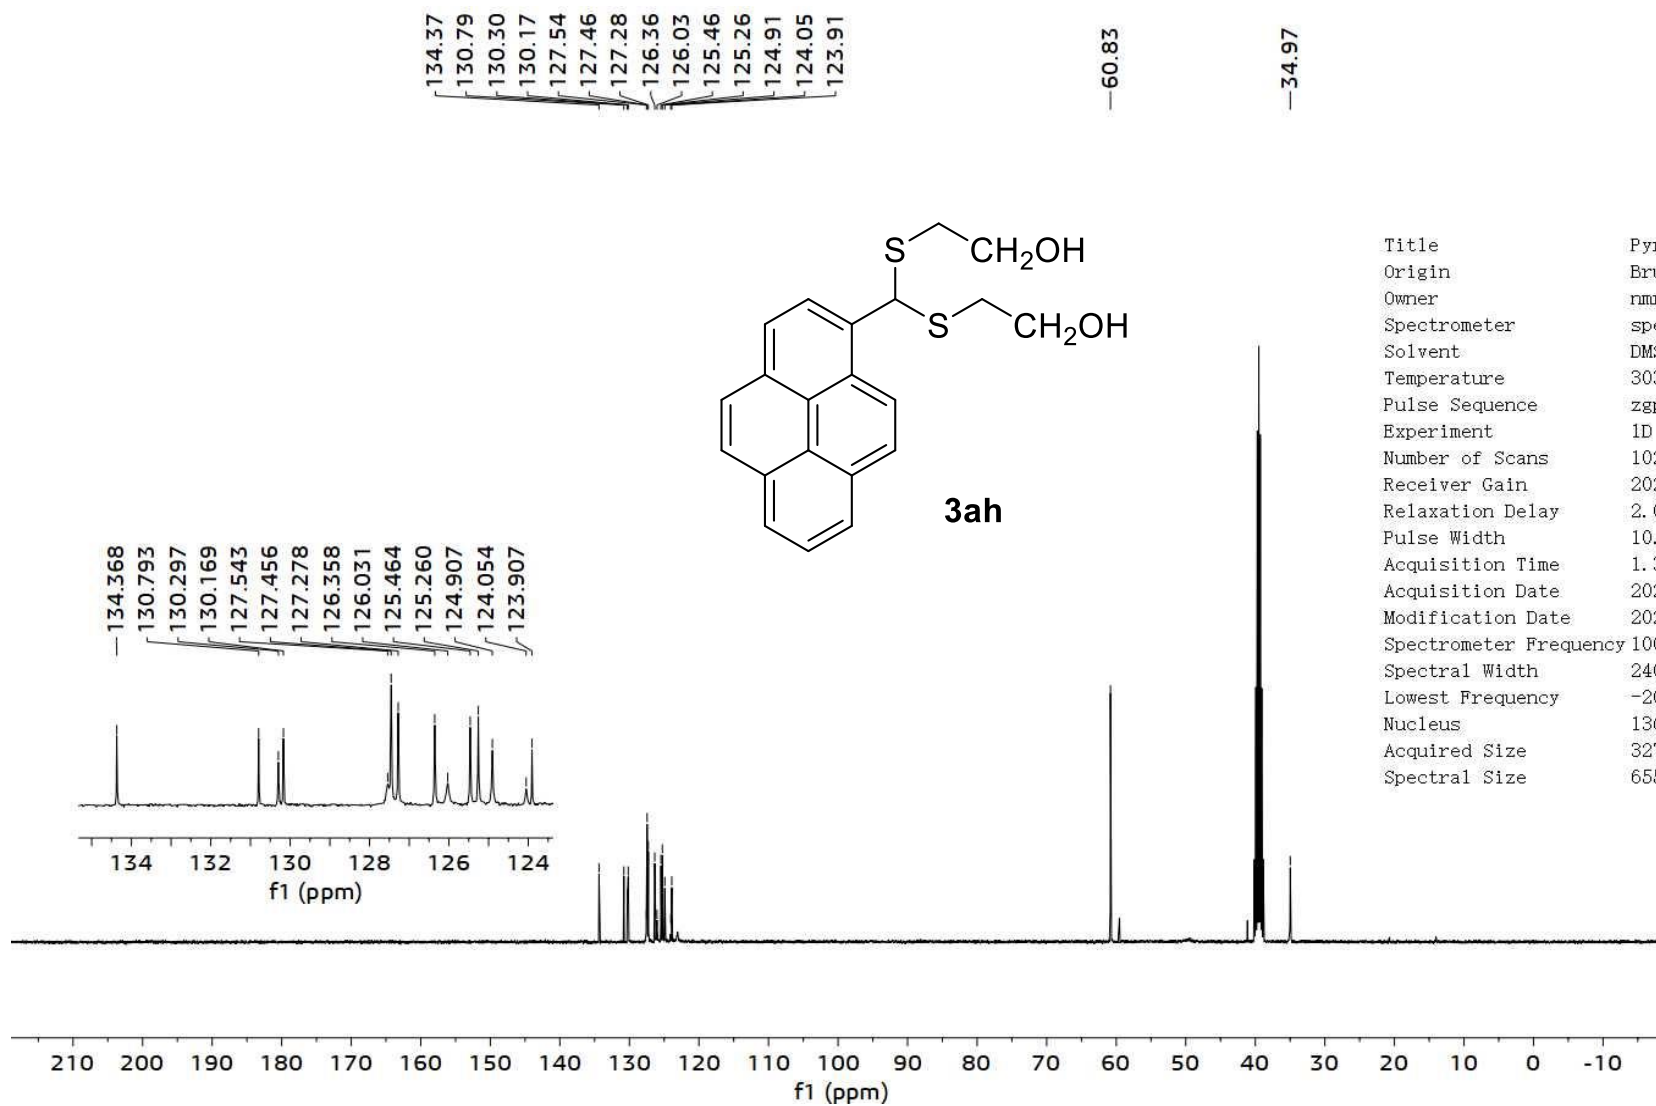

|                        |                     |
|------------------------|---------------------|
| Title                  | Pyr2-2. 2. 1        |
| Origin                 | Bruker BioSpin GmbH |
| Owner                  | nmrsu               |
| Spectrometer           | spect               |
| Solvent                | DMSO                |
| Temperature            | 303.0               |
| Pulse Sequence         | zgpg30              |
| Experiment             | 1D                  |
| Number of Scans        | 1024                |
| Receiver Gain          | 202                 |
| Relaxation Delay       | 2.0000              |
| Pulse Width            | 10.5800             |
| Acquisition Time       | 1.3631              |
| Acquisition Date       | 2021-06-25T00:24:17 |
| Modification Date      | 2021-06-25T00:24:18 |
| Spectrometer Frequency | 100.62              |
| Spectral Width         | 24038.5             |
| Lowest Frequency       | -2011.0             |
| Nucleus                | 13C                 |
| Acquired Size          | 32768               |
| Spectral Size          | 65536               |

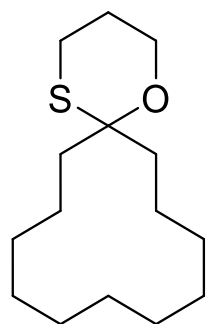

3ai

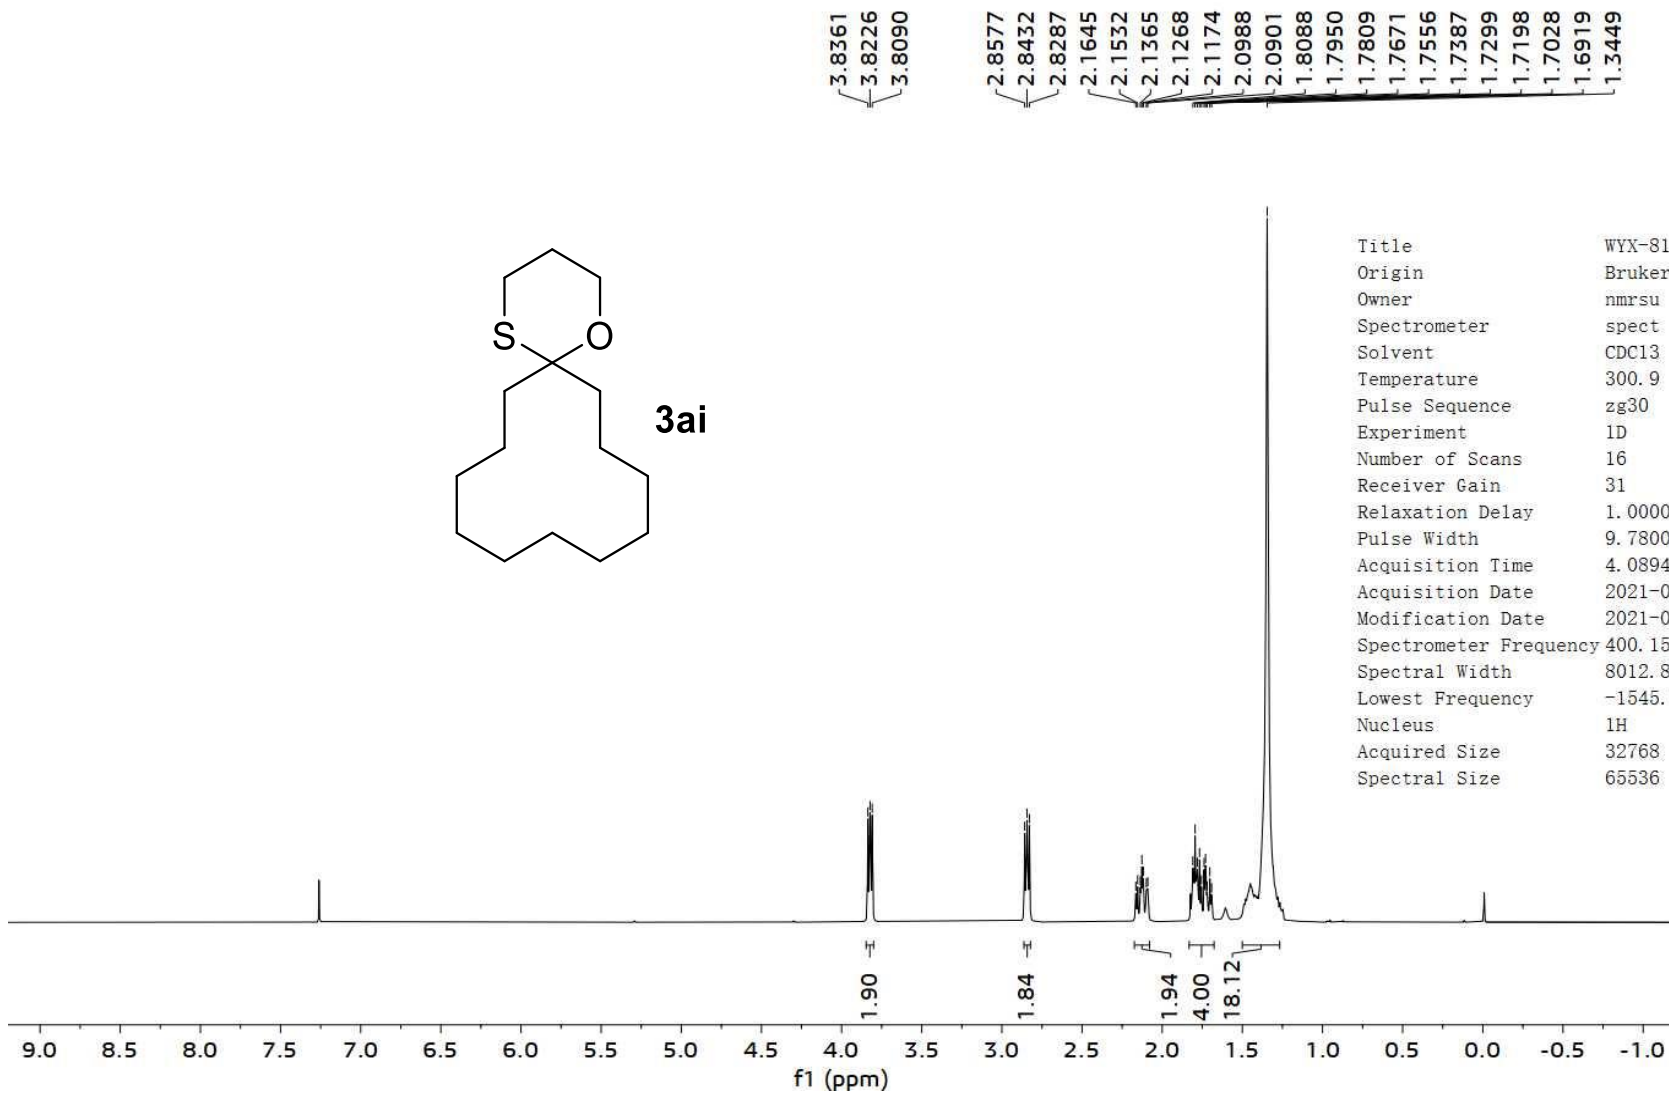

|                        |                       |
|------------------------|-----------------------|
| Title                  | WYX-81-yuanliao.1.fid |
| Origin                 | Bruker BioSpin GmbH   |
| Owner                  | nmsu                  |
| Spectrometer           | spect                 |
| Solvent                | CDC13                 |
| Temperature            | 300.9                 |
| Pulse Sequence         | zg30                  |
| Experiment             | 1D                    |
| Number of Scans        | 16                    |
| Receiver Gain          | 31                    |
| Relaxation Delay       | 1.0000                |
| Pulse Width            | 9.7800                |
| Acquisition Time       | 4.0894                |
| Acquisition Date       | 2021-07-20T23:23:12   |
| Modification Date      | 2021-07-20T23:23:14   |
| Spectrometer Frequency | 400.15                |
| Spectral Width         | 8012.8                |
| Lowest Frequency       | -1545.6               |
| Nucleus                | 1H                    |
| Acquired Size          | 32768                 |
| Spectral Size          | 65536                 |

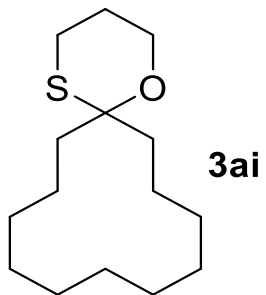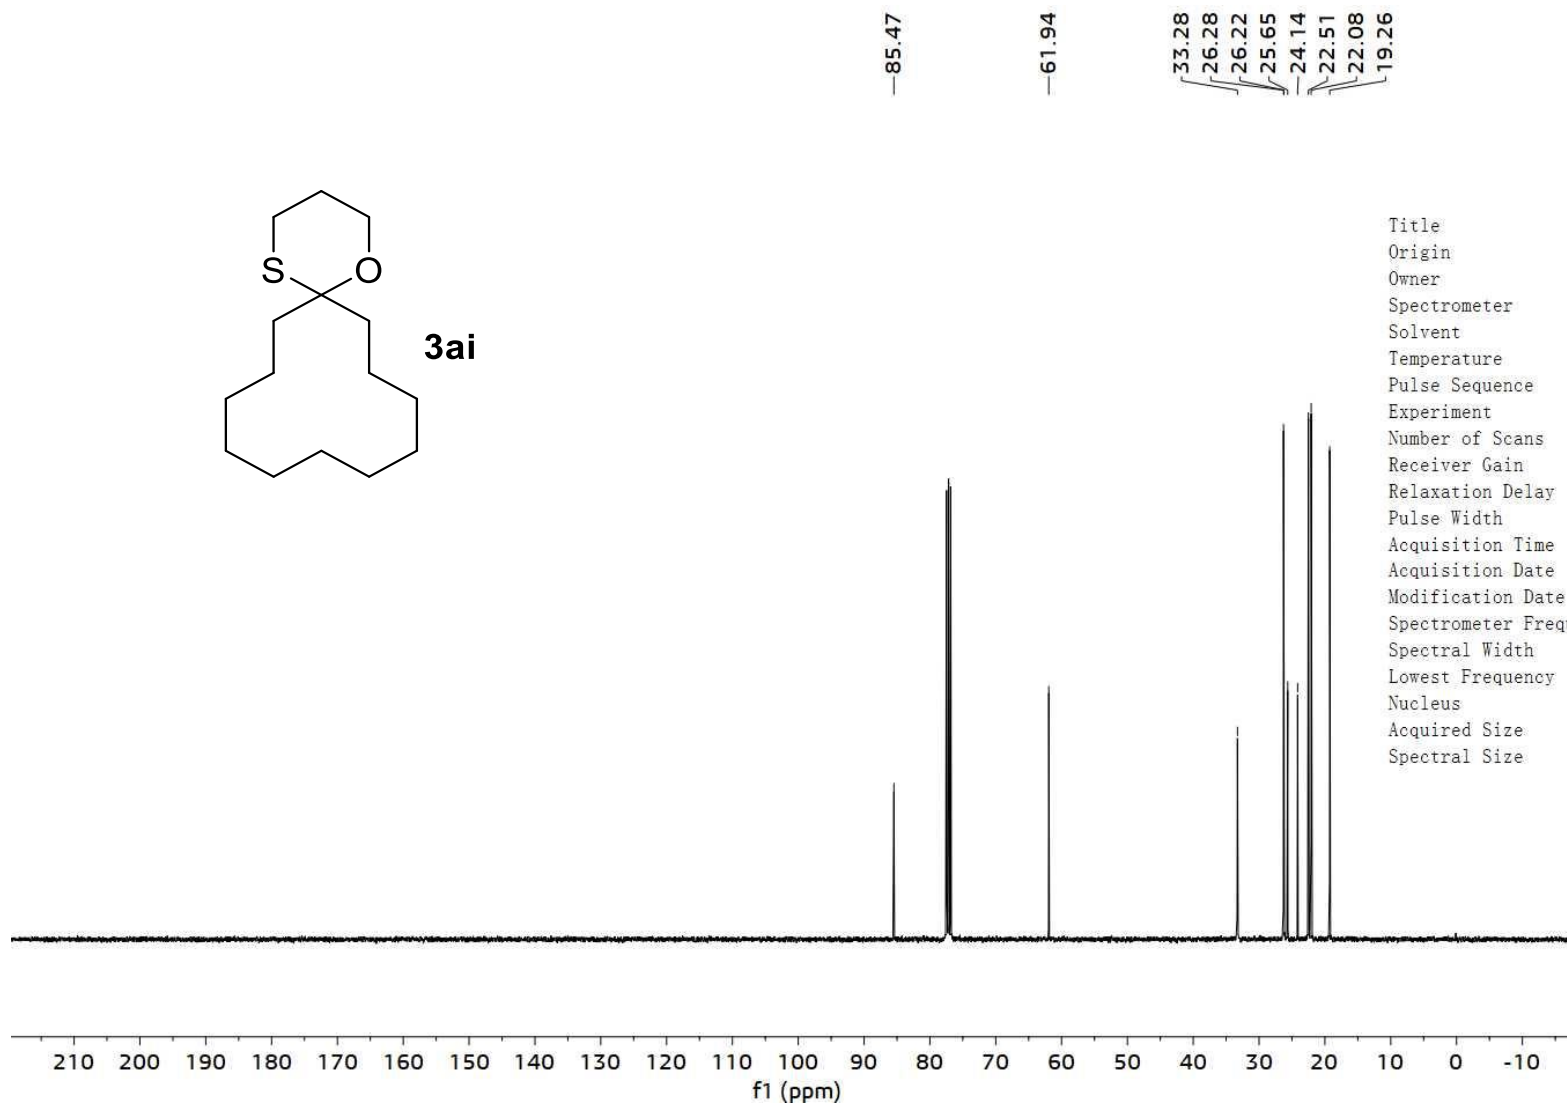

|                        |                       |
|------------------------|-----------------------|
| Title                  | WYX-81-yuanliao.2.fid |
| Origin                 | Bruker BioSpin GmbH   |
| Owner                  | nmrsu                 |
| Spectrometer           | spect                 |
| Solvent                | CDC13                 |
| Temperature            | 301.5                 |
| Pulse Sequence         | zgpg30                |
| Experiment             | 1D                    |
| Number of Scans        | 750                   |
| Receiver Gain          | 202                   |
| Relaxation Delay       | 2.0000                |
| Pulse Width            | 10.5800               |
| Acquisition Time       | 1.3631                |
| Acquisition Date       | 2021-07-21T00:07:07   |
| Modification Date      | 2021-07-21T00:07:08   |
| Spectrometer Frequency | 100.63                |
| Spectral Width         | 24038.5               |
| Lowest Frequency       | -1944.2               |
| Nucleus                | 13C                   |
| Acquired Size          | 32768                 |
| Spectral Size          | 65536                 |

4.0870  
 4.0692  
 4.0512  
 4.0335  
 3.7942  
 3.7863  
 3.7807  
 3.7724  
 3.7664  
 3.7597  
 2.8075  
 2.7998  
 2.7960  
 2.7924  
 2.7884  
 2.7795  
 2.4208  
 2.4072  
 2.4040  
 2.3975  
 2.3917  
 2.3834  
 2.3798  
 2.3686  
 2.2180  
 2.2035  
 2.1937  
 2.1823  
 2.1669  
 2.1589  
 2.1433  
 2.1152  
 2.0977  
 2.0922  
 2.0795  
 2.0746  
 2.0627  
 2.0556  
 2.0388  
 1.7325  
 1.7180  
 1.7128  
 1.7066  
 1.7041  
 1.6966  
 1.6897  
 1.6761  
 1.4849  
 1.2034  
 1.1855  
 1.1677

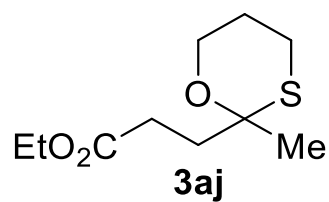

|                        |                       |
|------------------------|-----------------------|
| Title                  | WYX-83-yuanliao.1.fid |
| Origin                 | Bruker BioSpin GmbH   |
| Owner                  | nmrsu                 |
| Spectrometer           | spect                 |
| Solvent                | CDC13                 |
| Temperature            | 300.9                 |
| Pulse Sequence         | zg30                  |
| Experiment             | 1D                    |
| Number of Scans        | 16                    |
| Receiver Gain          | 15                    |
| Relaxation Delay       | 1.0000                |
| Pulse Width            | 9.7800                |
| Acquisition Time       | 4.0894                |
| Acquisition Date       | 2021-07-20T22:34:21   |
| Modification Date      | 2021-07-20T22:34:22   |
| Spectrometer Frequency | 400.15                |
| Spectral Width         | 8012.8                |
| Lowest Frequency       | -1545.4               |
| Nucleus                | <sup>1</sup> H        |
| Acquired Size          | 32768                 |
| Spectral Size          | 65536                 |

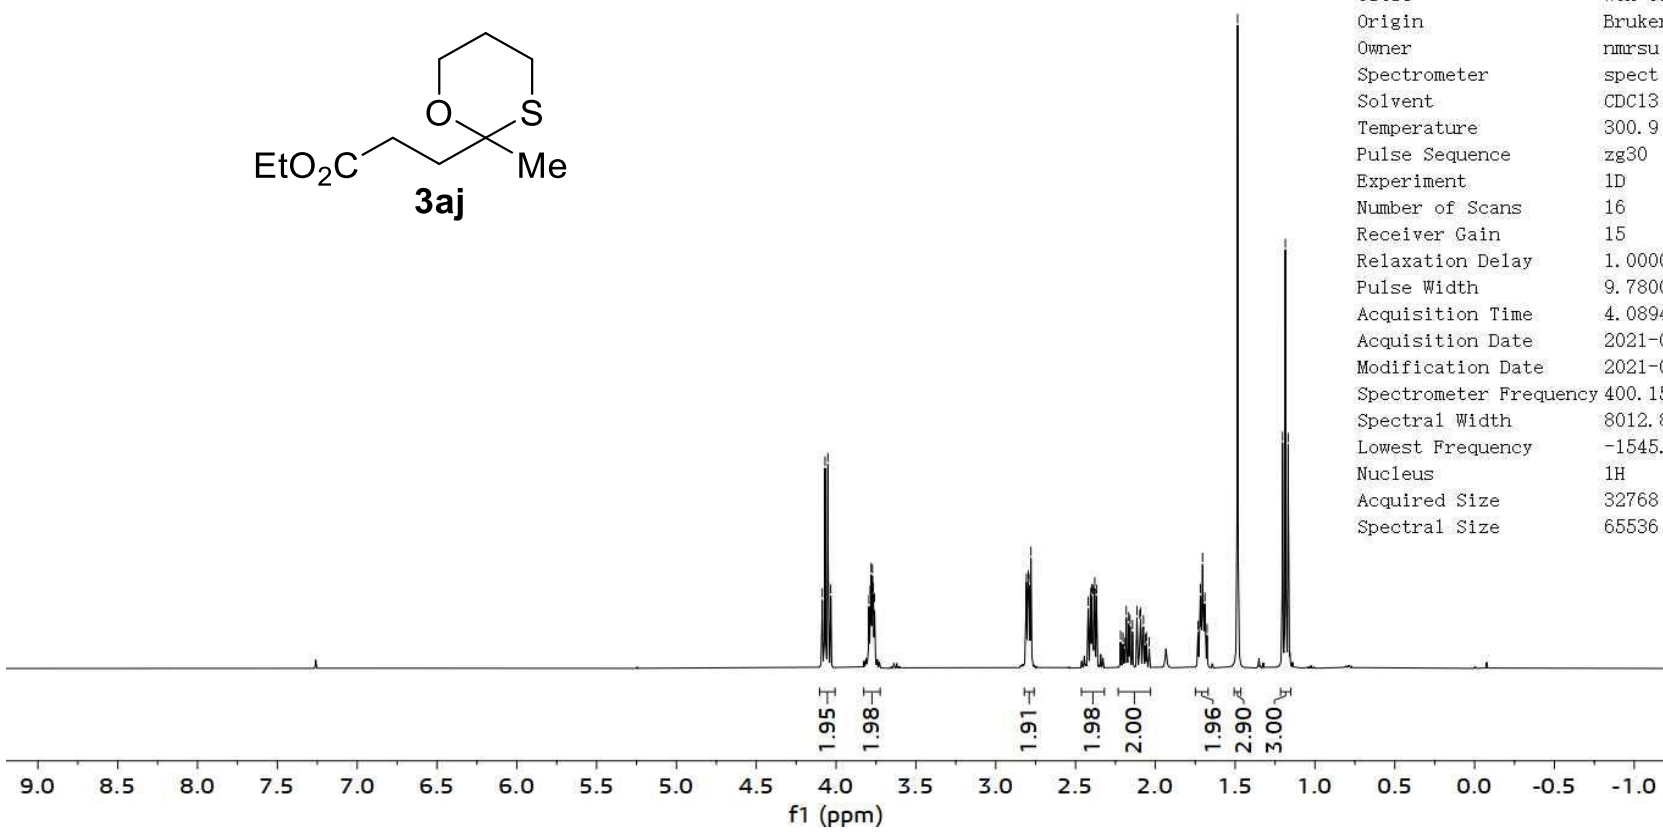

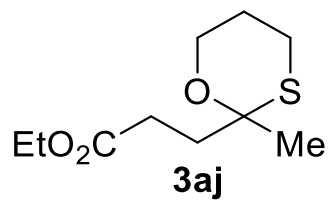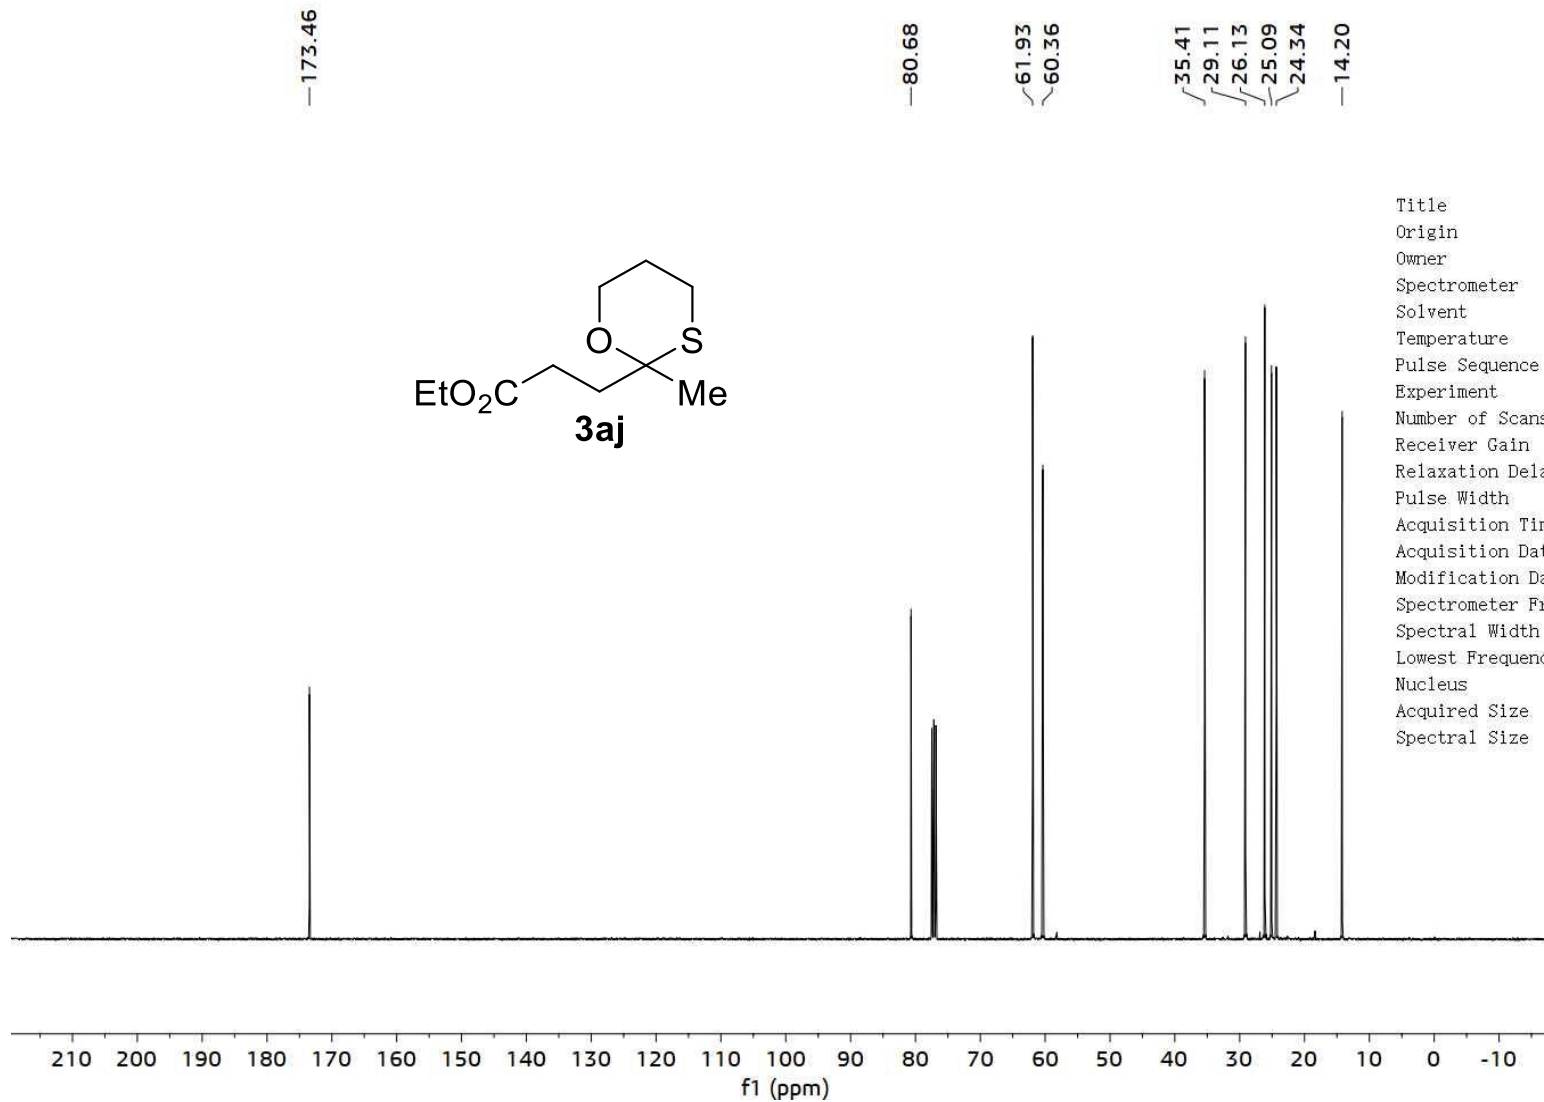

|                        |                       |
|------------------------|-----------------------|
| Title                  | WYX-83-yuanliao.2.fid |
| Origin                 | Bruker BioSpin GmbH   |
| Owner                  | nmrsu                 |
| Spectrometer           | spect                 |
| Solvent                | CDC13                 |
| Temperature            | 301.5                 |
| Pulse Sequence         | zpgp30                |
| Experiment             | 1D                    |
| Number of Scans        | 750                   |
| Receiver Gain          | 202                   |
| Relaxation Delay       | 2.0000                |
| Pulse Width            | 10.5800               |
| Acquisition Time       | 1.3631                |
| Acquisition Date       | 2021-07-20T23:18:15   |
| Modification Date      | 2021-07-20T23:18:16   |
| Spectrometer Frequency | 100.63                |
| Spectral Width         | 24038.5               |
| Lowest Frequency       | -1954.4               |
| Nucleus                | 13C                   |
| Acquired Size          | 32768                 |
| Spectral Size          | 65536                 |

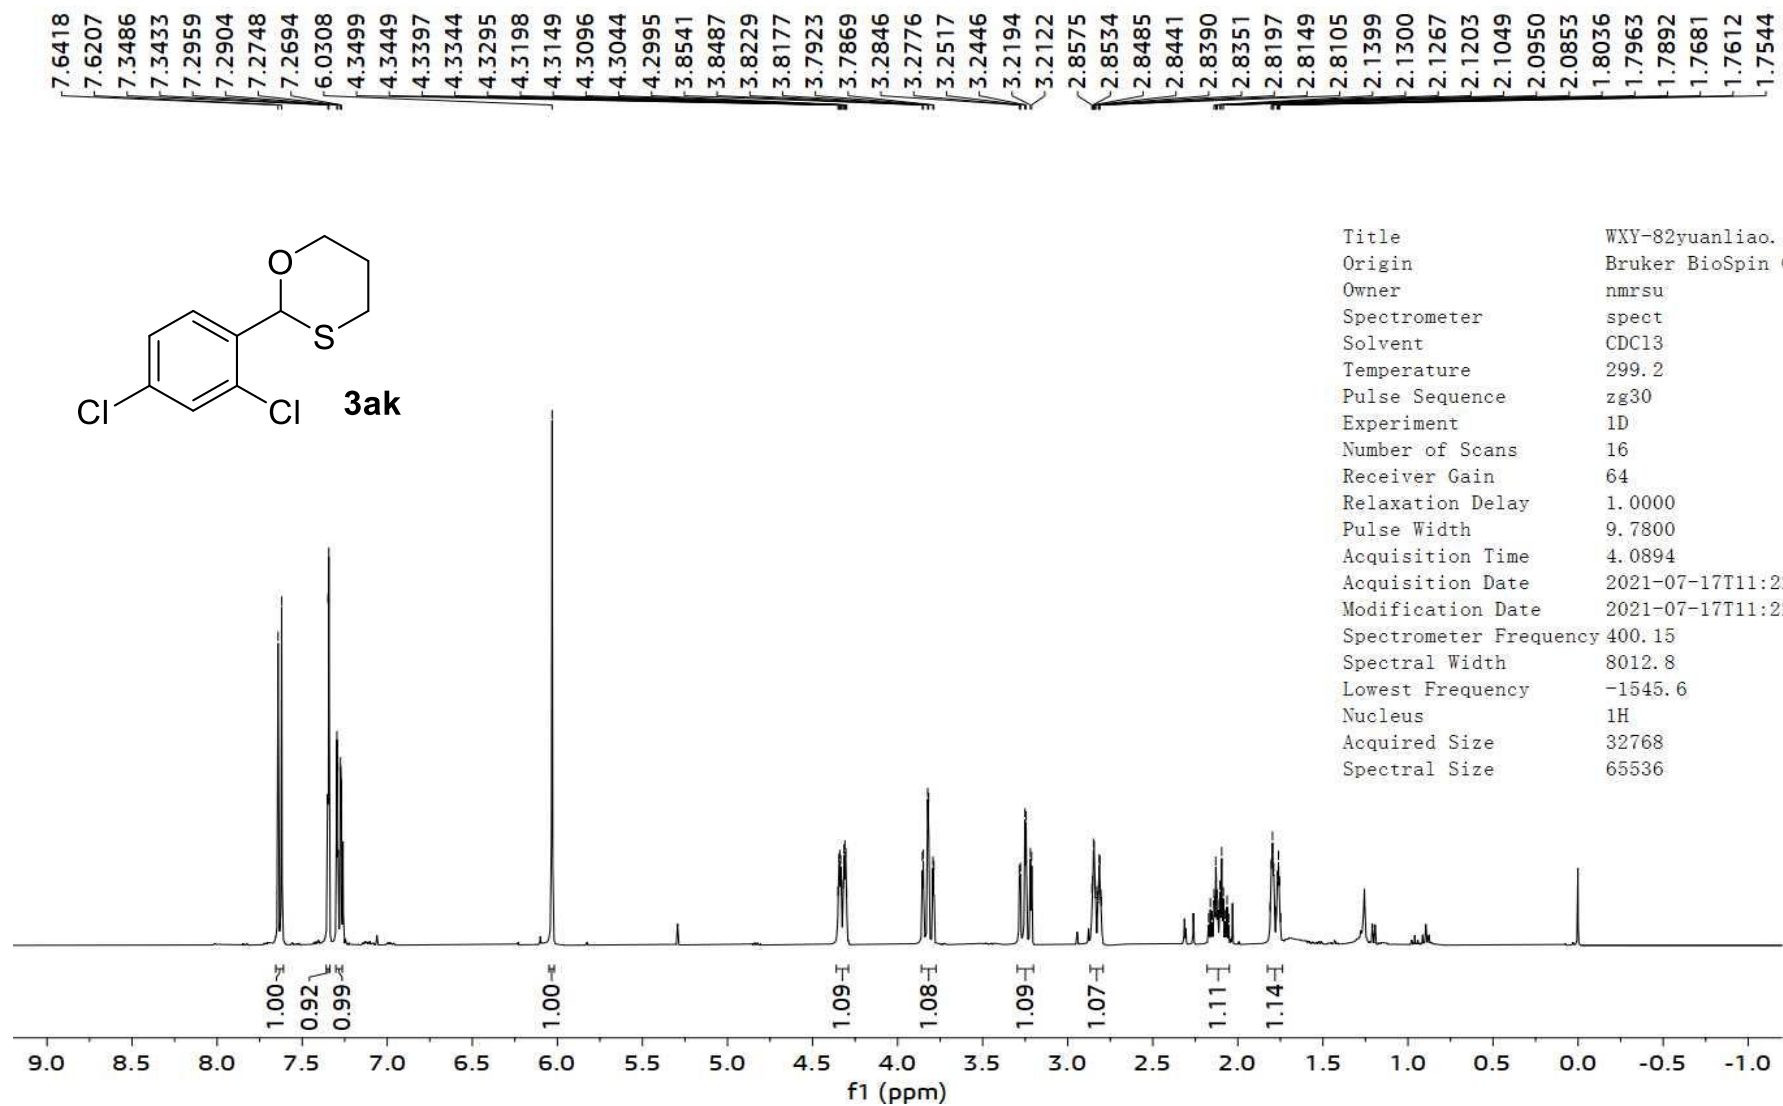

|                        |                      |
|------------------------|----------------------|
| Title                  | WXY-82yuanliao.1.fid |
| Origin                 | Bruker BioSpin GmbH  |
| Owner                  | nmrsu                |
| Spectrometer           | spect                |
| Solvent                | CDC13                |
| Temperature            | 299.2                |
| Pulse Sequence         | zg30                 |
| Experiment             | 1D                   |
| Number of Scans        | 16                   |
| Receiver Gain          | 64                   |
| Relaxation Delay       | 1.0000               |
| Pulse Width            | 9.7800               |
| Acquisition Time       | 4.0894               |
| Acquisition Date       | 2021-07-17T11:22:05  |
| Modification Date      | 2021-07-17T11:22:06  |
| Spectrometer Frequency | 400.15               |
| Spectral Width         | 8012.8               |
| Lowest Frequency       | -1545.6              |
| Nucleus                | 1H                   |
| Acquired Size          | 32768                |
| Spectral Size          | 65536                |



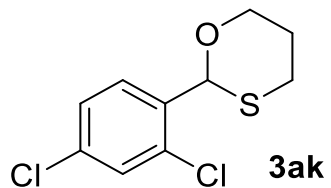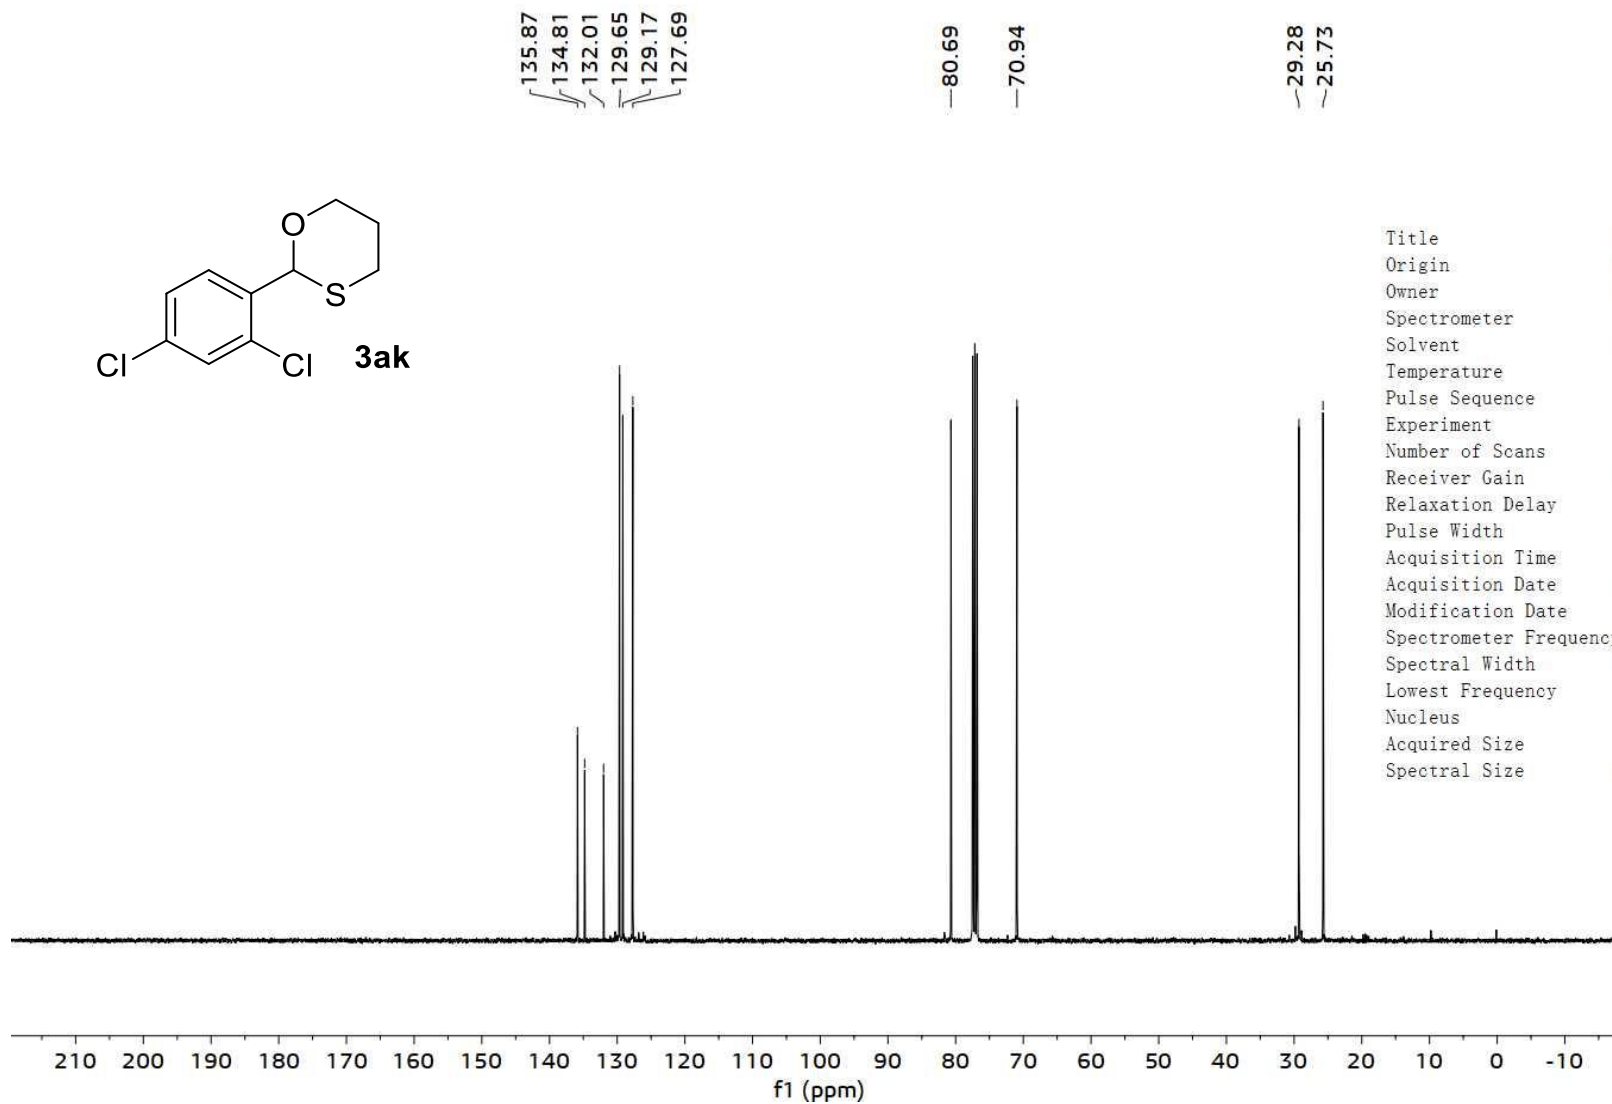

|                        |                      |
|------------------------|----------------------|
| Title                  | WXY-82yuanliao.2.fid |
| Origin                 | Bruker BioSpin GmbH  |
| Owner                  | nmsu                 |
| Spectrometer           | spect                |
| Solvent                | CDC13                |
| Temperature            | 300.1                |
| Pulse Sequence         | zpg30                |
| Experiment             | 1D                   |
| Number of Scans        | 1700                 |
| Receiver Gain          | 202                  |
| Relaxation Delay       | 2.0000               |
| Pulse Width            | 10.5800              |
| Acquisition Time       | 1.3631               |
| Acquisition Date       | 2021-07-17T13:00:15  |
| Modification Date      | 2021-07-17T13:00:16  |
| Spectrometer Frequency | 100.63               |
| Spectral Width         | 24038.5              |
| Lowest Frequency       | -1947.1              |
| Nucleus                | 13C                  |
| Acquired Size          | 32768                |
| Spectral Size          | 65536                |

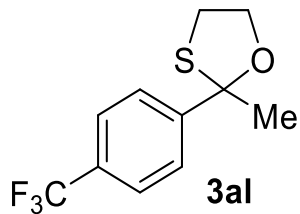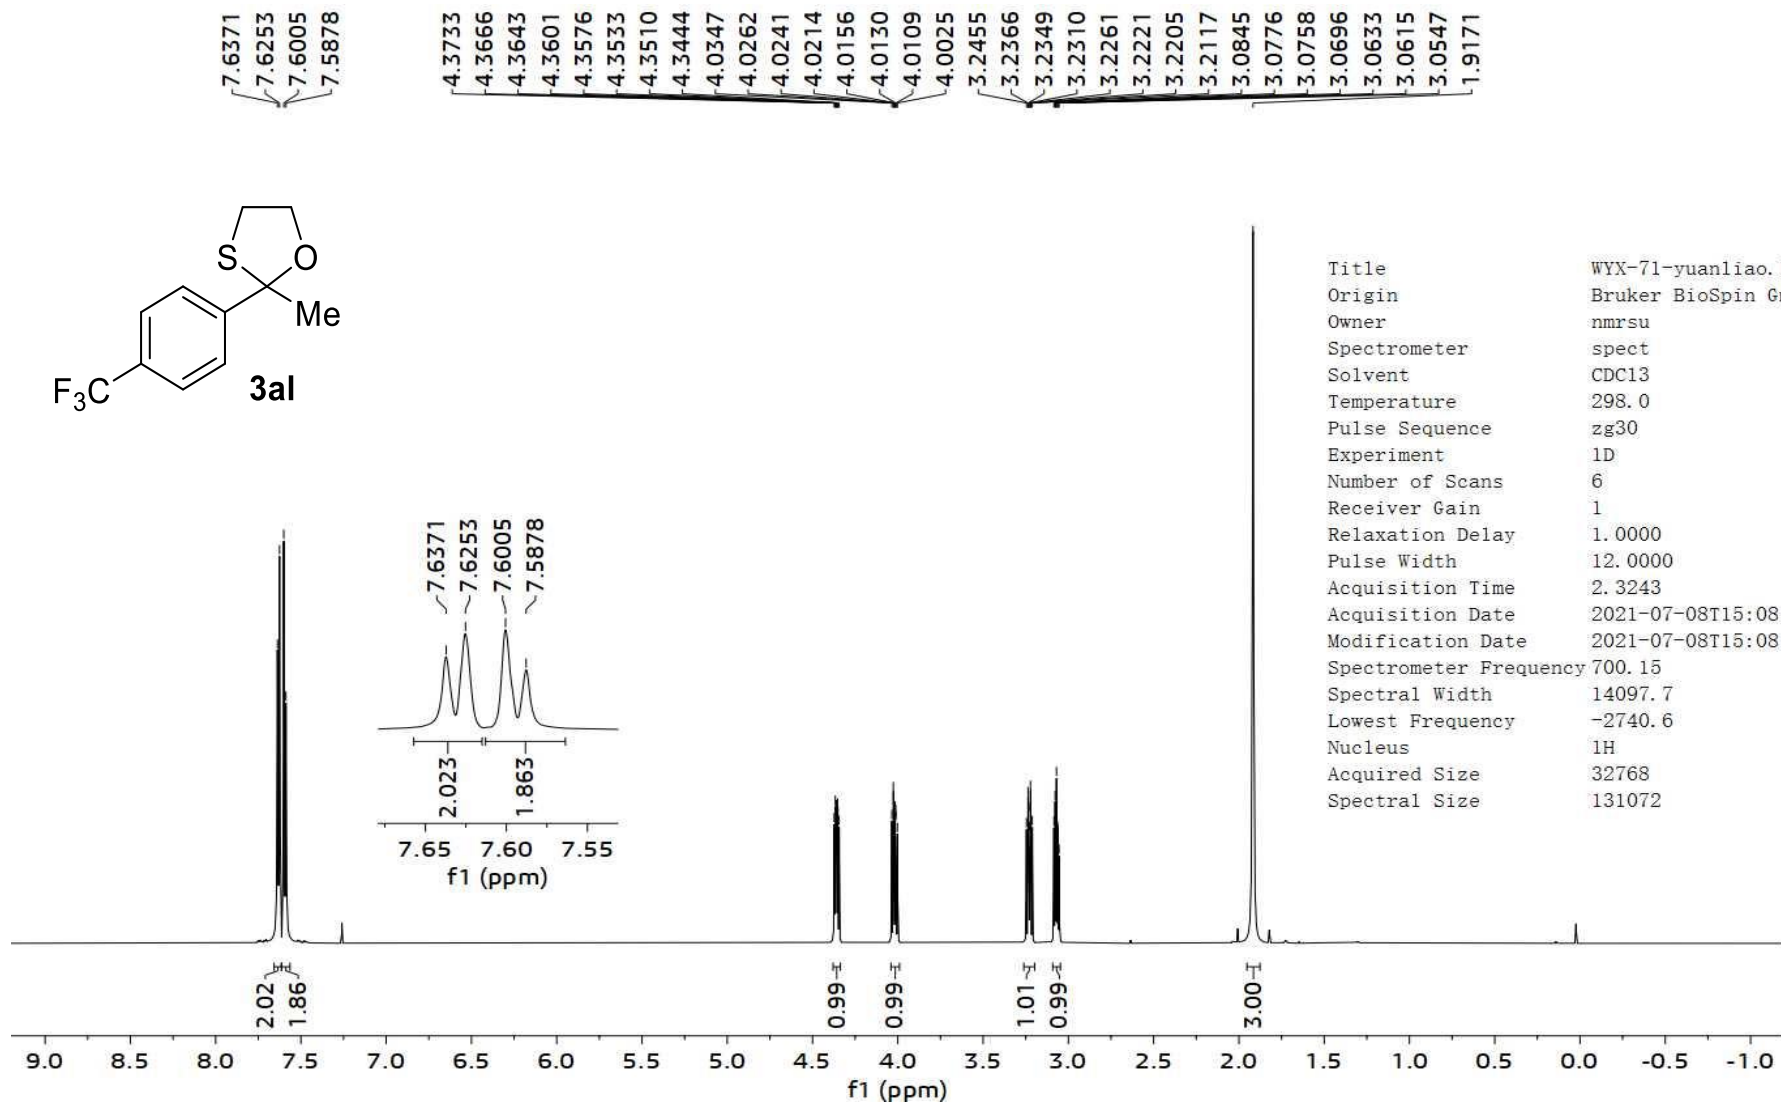

|                        |                        |
|------------------------|------------------------|
| Title                  | WYX-71-yuanliao.1. fid |
| Origin                 | Bruker BioSpin GmbH    |
| Owner                  | nmrsu                  |
| Spectrometer           | spect                  |
| Solvent                | CDC13                  |
| Temperature            | 298.0                  |
| Pulse Sequence         | zg30                   |
| Experiment             | 1D                     |
| Number of Scans        | 6                      |
| Receiver Gain          | 1                      |
| Relaxation Delay       | 1.0000                 |
| Pulse Width            | 12.0000                |
| Acquisition Time       | 2.3243                 |
| Acquisition Date       | 2021-07-08T15:08:38    |
| Modification Date      | 2021-07-08T15:08:40    |
| Spectrometer Frequency | 700.15                 |
| Spectral Width         | 14097.7                |
| Lowest Frequency       | -2740.6                |
| Nucleus                | 1H                     |
| Acquired Size          | 32768                  |
| Spectral Size          | 131072                 |

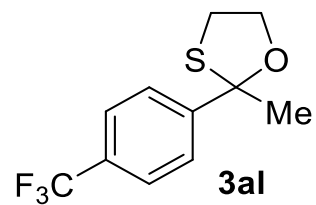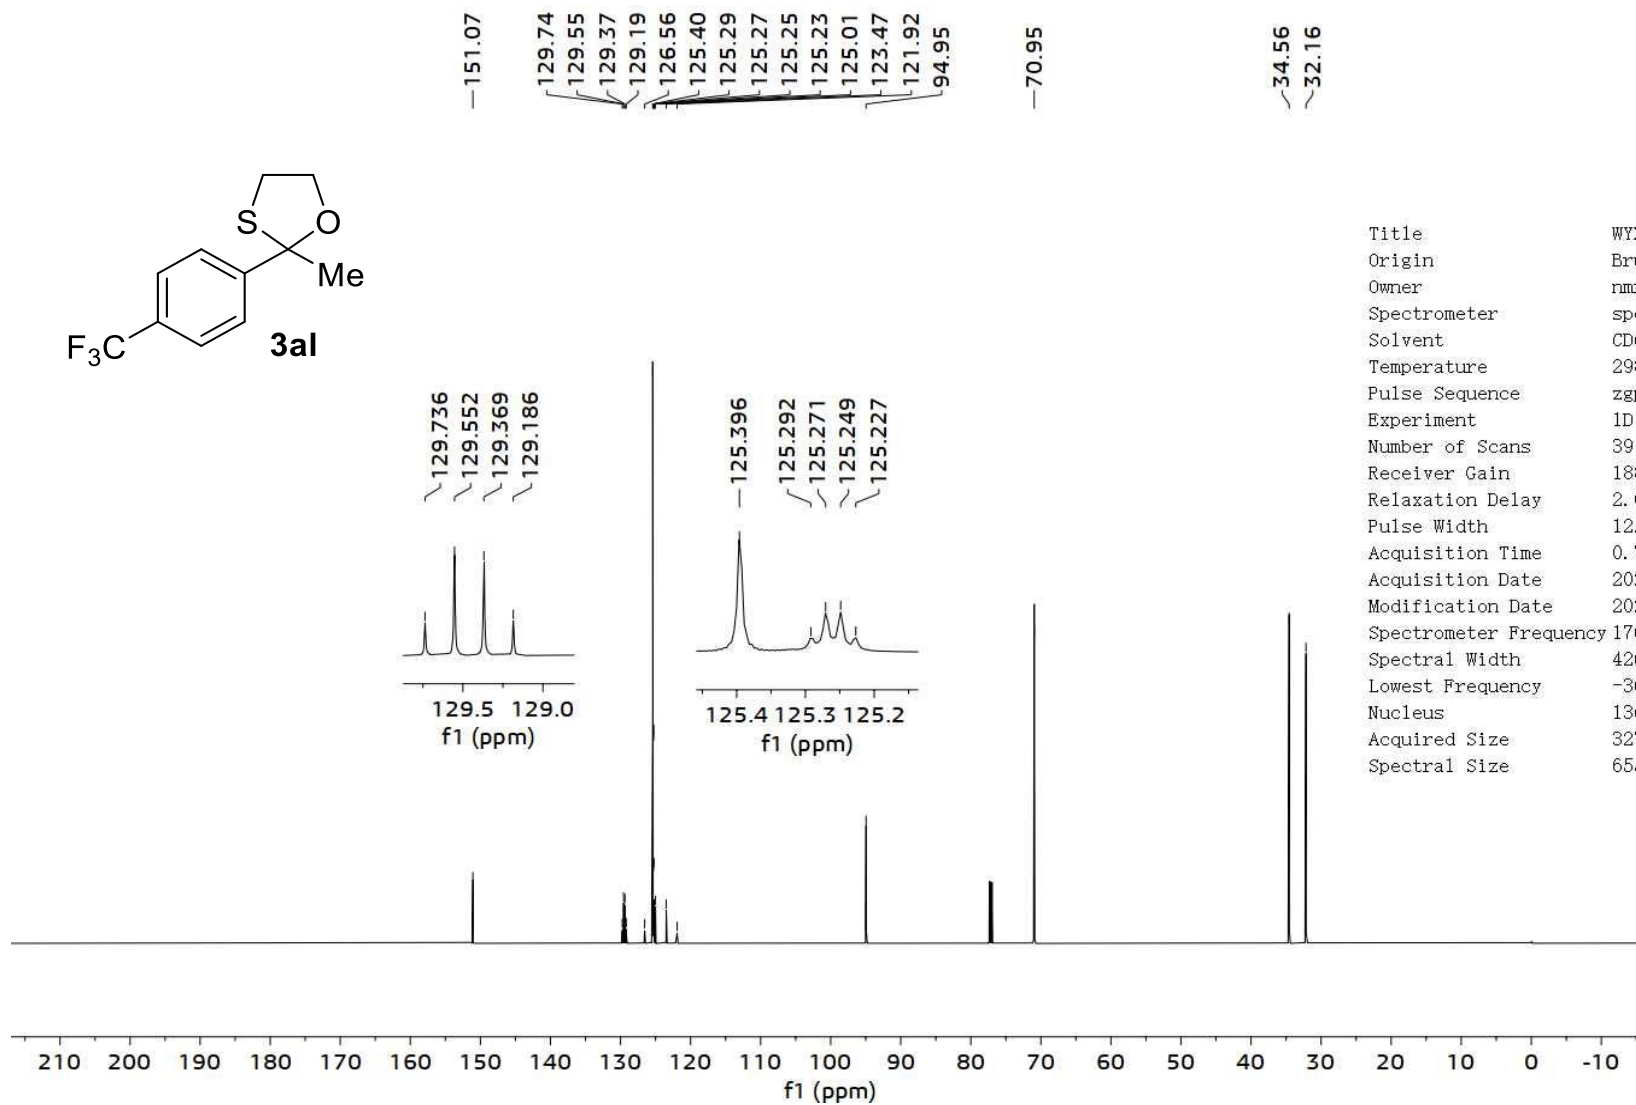

|                        |                       |
|------------------------|-----------------------|
| Title                  | WYX-71-yuanliao.2.fid |
| Origin                 | Bruker BioSpin GmbH   |
| Owner                  | nmrsu                 |
| Spectrometer           | spect                 |
| Solvent                | CDC13                 |
| Temperature            | 298.0                 |
| Pulse Sequence         | zgpg30                |
| Experiment             | 1D                    |
| Number of Scans        | 39                    |
| Receiver Gain          | 188                   |
| Relaxation Delay       | 2.0000                |
| Pulse Width            | 12.0000               |
| Acquisition Time       | 0.7690                |
| Acquisition Date       | 2021-07-08T15:10:41   |
| Modification Date      | 2021-07-08T15:10:52   |
| Spectrometer Frequency | 176.07                |
| Spectral Width         | 42613.6               |
| Lowest Frequency       | -3692.7               |
| Nucleus                | 13C                   |
| Acquired Size          | 32768                 |
| Spectral Size          | 65536                 |

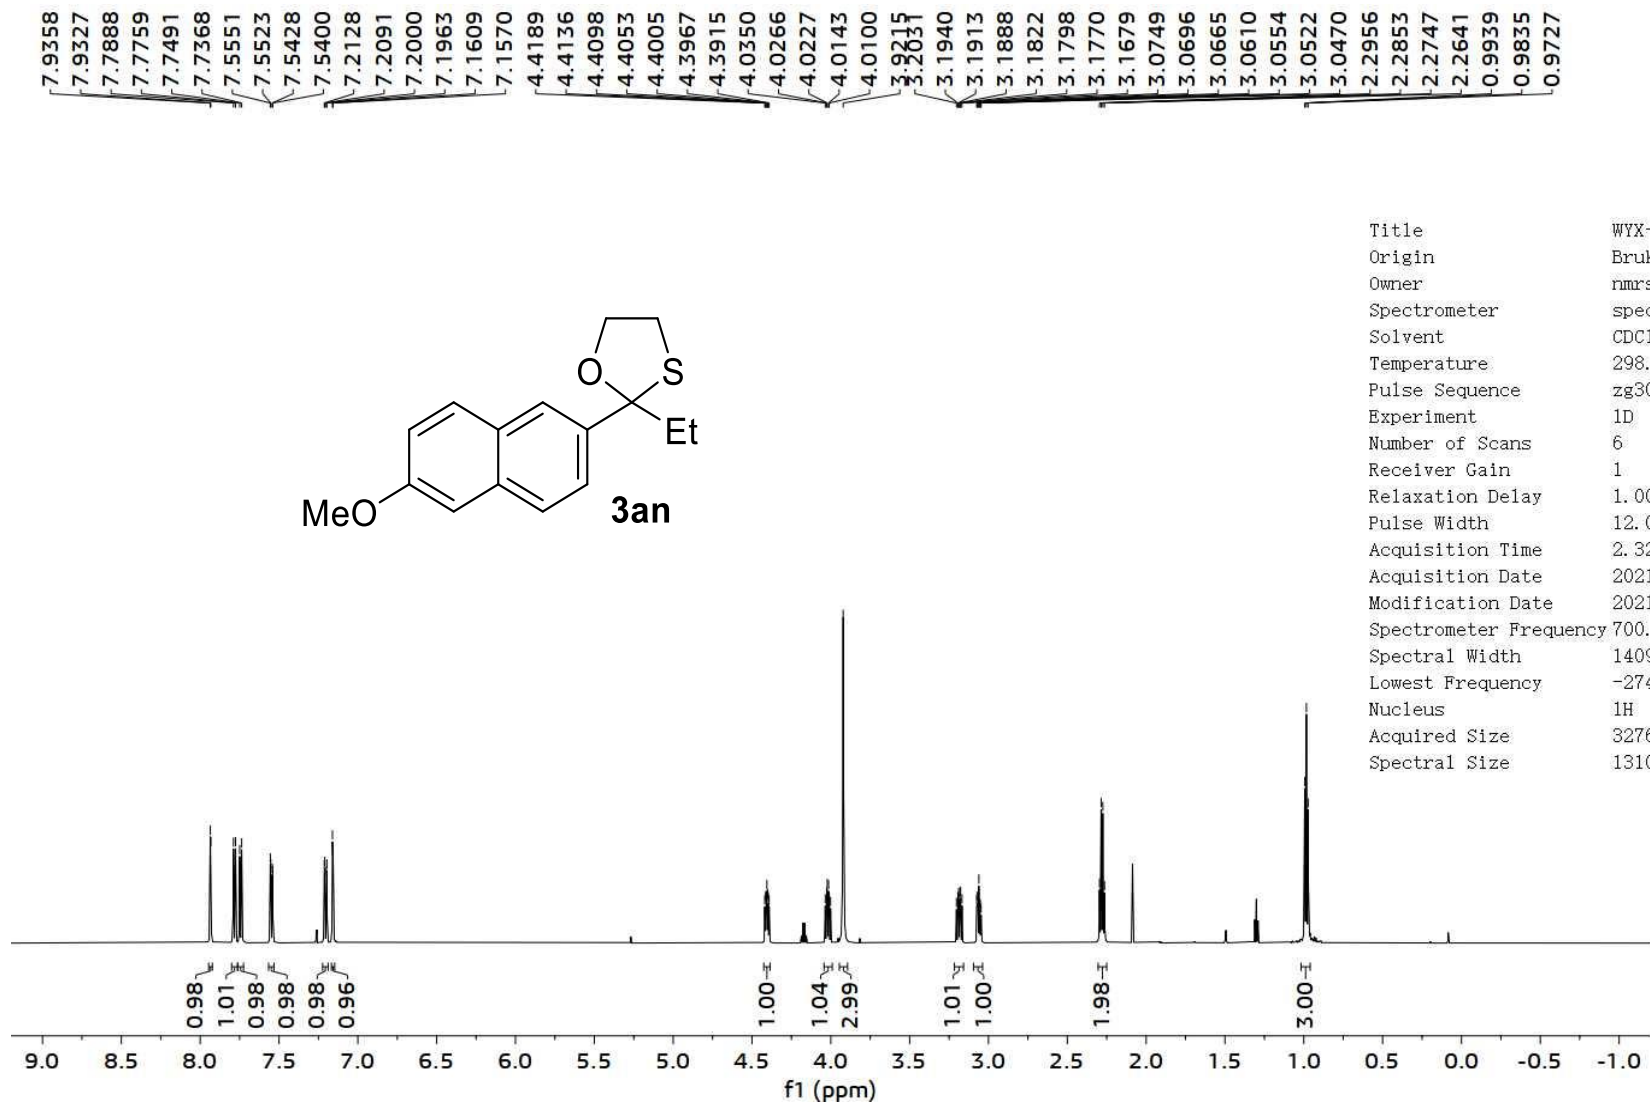

|                        |                       |
|------------------------|-----------------------|
| Title                  | WYX-72-yuanliao.1.fid |
| Origin                 | Bruker BioSpin GmbH   |
| Owner                  | nmrsu                 |
| Spectrometer           | spect                 |
| Solvent                | CDC13                 |
| Temperature            | 298.0                 |
| Pulse Sequence         | zg30                  |
| Experiment             | 1D                    |
| Number of Scans        | 6                     |
| Receiver Gain          | 1                     |
| Relaxation Delay       | 1.0000                |
| Pulse Width            | 12.0000               |
| Acquisition Time       | 2.3243                |
| Acquisition Date       | 2021-07-08T15:14:46   |
| Modification Date      | 2021-07-08T15:14:50   |
| Spectrometer Frequency | 700.15                |
| Spectral Width         | 14097.7               |
| Lowest Frequency       | -2740.1               |
| Nucleus                | 1H                    |
| Acquired Size          | 32768                 |
| Spectral Size          | 131072                |

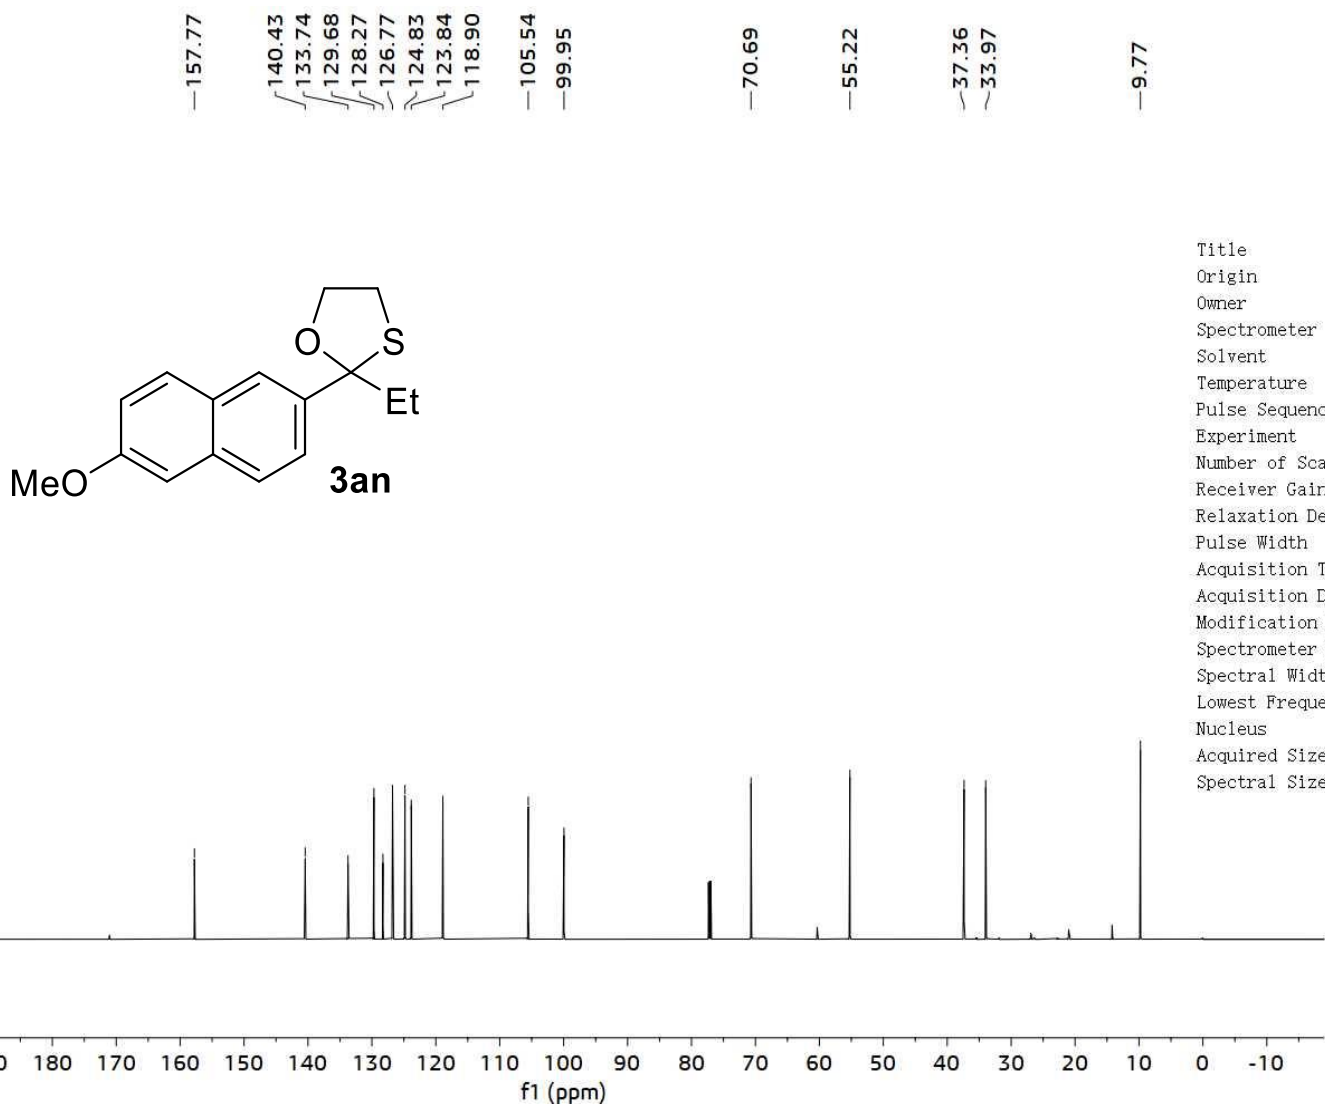

|                        |                       |
|------------------------|-----------------------|
| Title                  | WYX-72-yuanliao.2.fid |
| Origin                 | Bruker BioSpin GmbH   |
| Owner                  | nmrsu                 |
| Spectrometer           | spect                 |
| Solvent                | CDC13                 |
| Temperature            | 298.0                 |
| Pulse Sequence         | zgpg30                |
| Experiment             | 1D                    |
| Number of Scans        | 65                    |
| Receiver Gain          | 188                   |
| Relaxation Delay       | 2.0000                |
| Pulse Width            | 12.0000               |
| Acquisition Time       | 0.7690                |
| Acquisition Date       | 2021-07-08T15:18:06   |
| Modification Date      | 2021-07-08T15:18:14   |
| Spectrometer Frequency | 176.07                |
| Spectral Width         | 42613.6               |
| Lowest Frequency       | -3718.7               |
| Nucleus                | 13C                   |
| Acquired Size          | 32768                 |
| Spectral Size          | 65536                 |

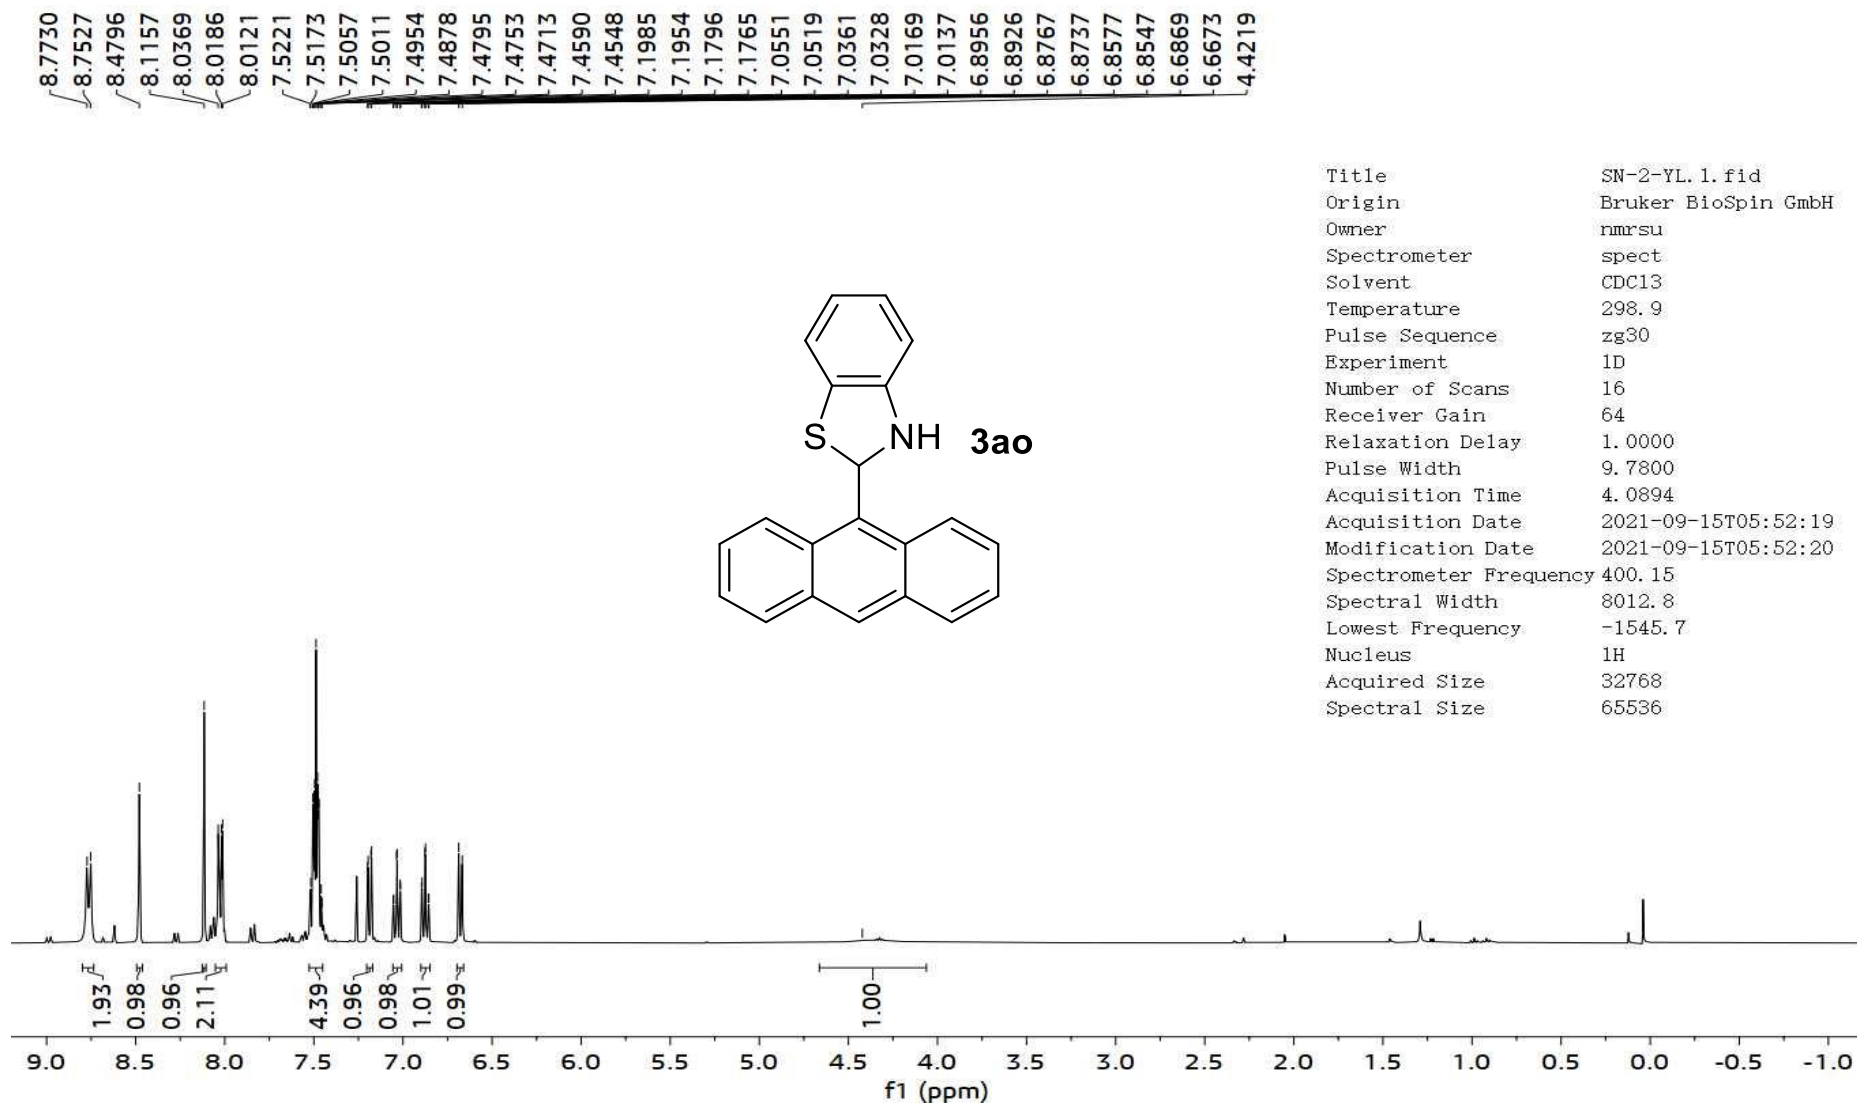

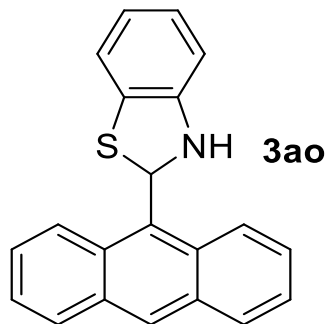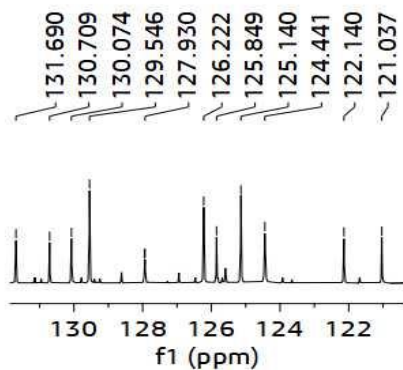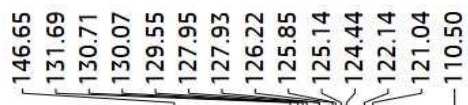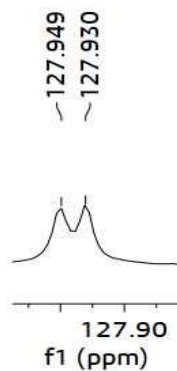

— 65.65

|                        |                     |
|------------------------|---------------------|
| Title                  | SN-2-YL. 2. fid     |
| Origin                 | Bruker BioSpin GmbH |
| Owner                  | nmrsu               |
| Spectrometer           | spect               |
| Solvent                | CDCl3               |
| Temperature            | 299.4               |
| Pulse Sequence         | zgpg30              |
| Experiment             | 1D                  |
| Number of Scans        | 750                 |
| Receiver Gain          | 202                 |
| Relaxation Delay       | 2.0000              |
| Pulse Width            | 10.5800             |
| Acquisition Time       | 1.3631              |
| Acquisition Date       | 2021-09-15T06:36:19 |
| Modification Date      | 2021-09-15T06:36:20 |
| Spectrometer Frequency | 100.63              |
| Spectral Width         | 24038.5             |
| Lowest Frequency       | -1950.0             |
| Nucleus                | 13C                 |
| Acquired Size          | 32768               |
| Spectral Size          | 65536               |

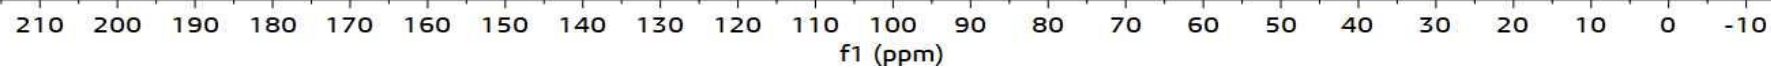

7.0837  
7.0804  
7.0648  
7.0616  
6.9256  
6.9099  
6.9067  
6.8909  
6.8877  
6.7652  
6.7623  
6.7464  
6.7434  
6.7276  
6.7246  
6.6557  
6.6527  
6.6362  
6.5837  
5.2682  
5.2520

— 3.9930

1.8928  
1.8837  
1.8767  
1.8670  
1.8546  
1.8497  
1.8494  
1.4298  
1.4134  
1.4051  
1.4048  
1.3988  
1.3890  
1.3274  
1.3164  
1.3109  
1.3005  
1.2914  
0.9281  
0.9115  
0.8939

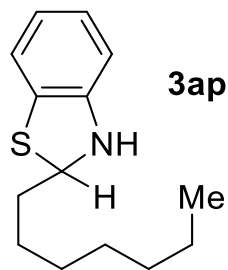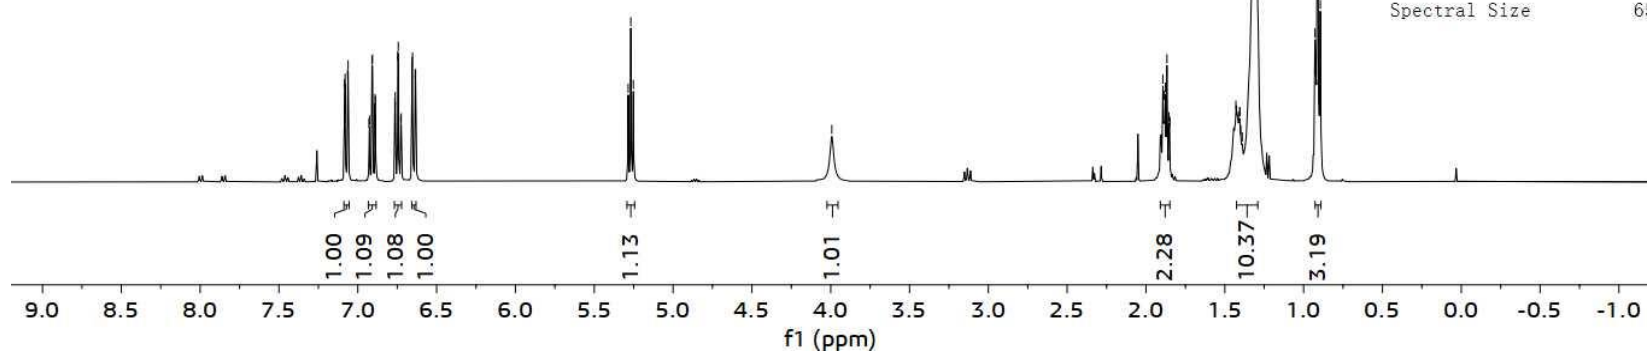

|                        |                     |
|------------------------|---------------------|
| Title                  | SN-3-YL. 1. fid     |
| Origin                 | Bruker BioSpin GmbH |
| Owner                  | nmrsu               |
| Spectrometer           | spect               |
| Solvent                | CDC13               |
| Temperature            | 298.0               |
| Pulse Sequence         | zg30                |
| Experiment             | 1D                  |
| Number of Scans        | 16                  |
| Receiver Gain          | 17                  |
| Relaxation Delay       | 1.0000              |
| Pulse Width            | 9.7800              |
| Acquisition Time       | 4.0894              |
| Acquisition Date       | 2021-10-12T00:42:37 |
| Modification Date      | 2021-10-12T00:42:38 |
| Spectrometer Frequency | 400.15              |
| Spectral Width         | 8012.8              |
| Lowest Frequency       | -1545.4             |
| Nucleus                | 1H                  |
| Acquired Size          | 32768               |
| Spectral Size          | 65536               |



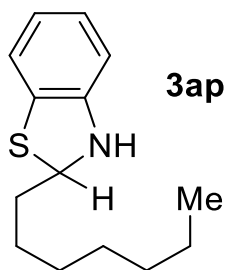

—146.69  
 —127.64  
 —125.15  
 —122.03  
 —120.83  
 —110.86  
 —68.98  
 —38.65  
 —31.83  
 —29.33  
 —29.25  
 —26.22  
 —22.71  
 —14.18

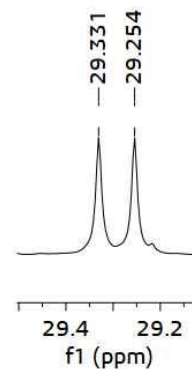

|                        |                     |
|------------------------|---------------------|
| Title                  | SN-3-YL. 2. fid     |
| Origin                 | Bruker BioSpin GmbH |
| Owner                  | nmrsu               |
| Spectrometer           | spect               |
| Solvent                | CDC13               |
| Temperature            | 298.0               |
| Pulse Sequence         | zgpg30              |
| Experiment             | 1D                  |
| Number of Scans        | 700                 |
| Receiver Gain          | 202                 |
| Relaxation Delay       | 2.0000              |
| Pulse Width            | 10.5800             |
| Acquisition Time       | 1.3631              |
| Acquisition Date       | 2021-10-12T01:23:40 |
| Modification Date      | 2021-10-12T01:23:42 |
| Spectrometer Frequency | 100.63              |
| Spectral Width         | 24038.5             |
| Lowest Frequency       | -1953.3             |
| Nucleus                | 13C                 |
| Acquired Size          | 32768               |
| Spectral Size          | 65536               |

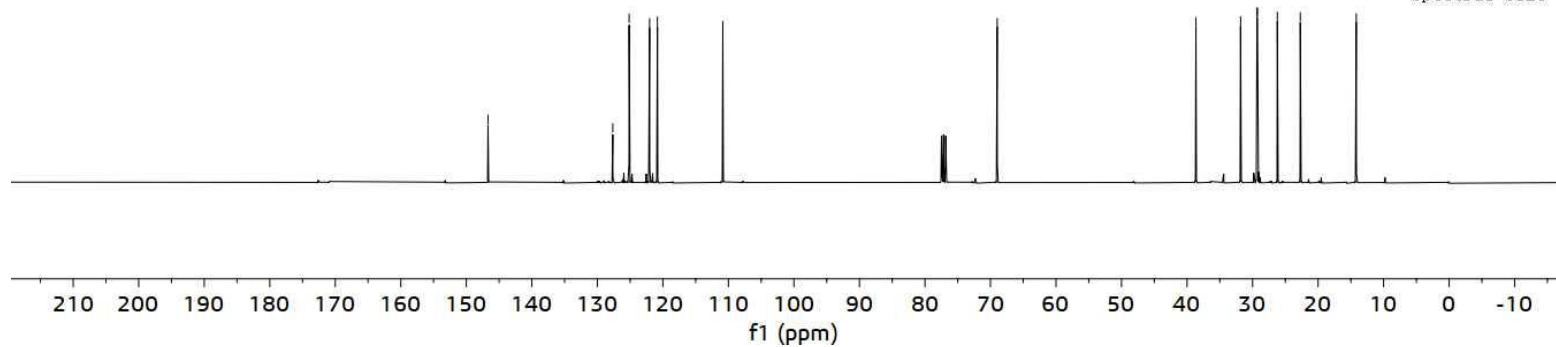

7.8342  
7.8282  
7.8181  
7.8122  
7.5209  
7.5149  
7.5106  
7.5046  
7.4993  
7.4933  
7.4874  
7.0965  
7.0874  
7.0754  
7.0677  
7.0641  
7.0487  
6.9677  
6.9486  
6.9416  
6.9203  
6.9039

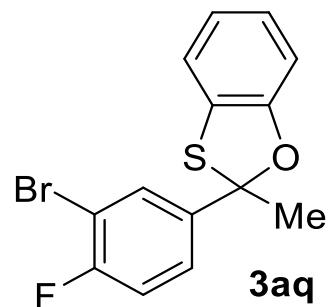

-2.1411

|                        |                     |
|------------------------|---------------------|
| Title                  | WYX-91-YL. 2. fid   |
| Origin                 | Bruker BioSpin GmbH |
| Owner                  | nmrsu               |
| Spectrometer           | spect               |
| Solvent                | CDC13               |
| Temperature            | 298.0               |
| Pulse Sequence         | zg30                |
| Experiment             | 1D                  |
| Number of Scans        | 16                  |
| Receiver Gain          | 31                  |
| Relaxation Delay       | 1.0000              |
| Pulse Width            | 9.7800              |
| Acquisition Time       | 4.0894              |
| Acquisition Date       | 2021-09-15T23:52:13 |
| Modification Date      | 2021-09-15T23:52:14 |
| Spectrometer Frequency | 400.15              |
| Spectral Width         | 8012.8              |
| Lowest Frequency       | -1545.4             |
| Nucleus                | 1H                  |
| Acquired Size          | 32768               |
| Spectral Size          | 65536               |

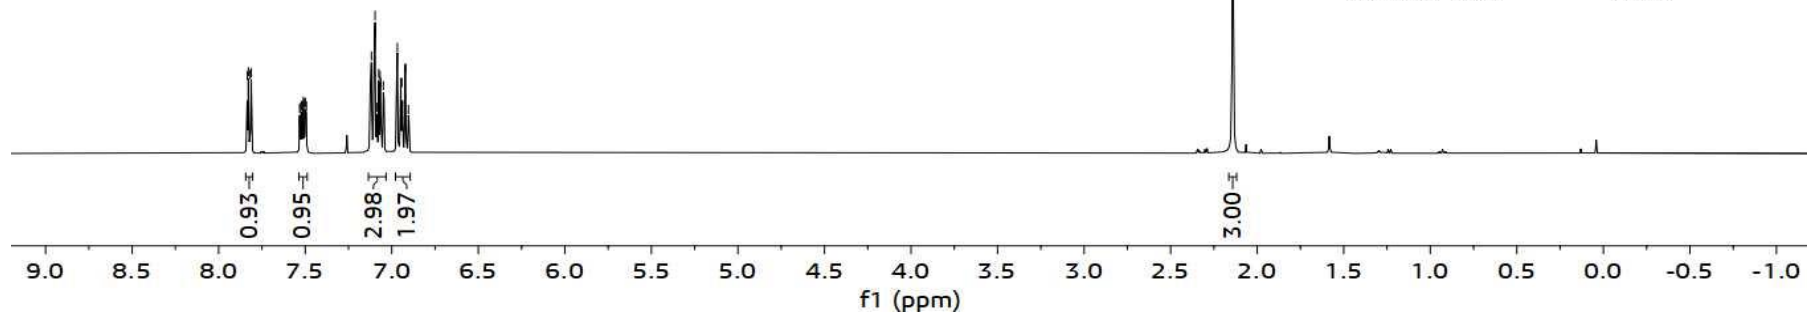

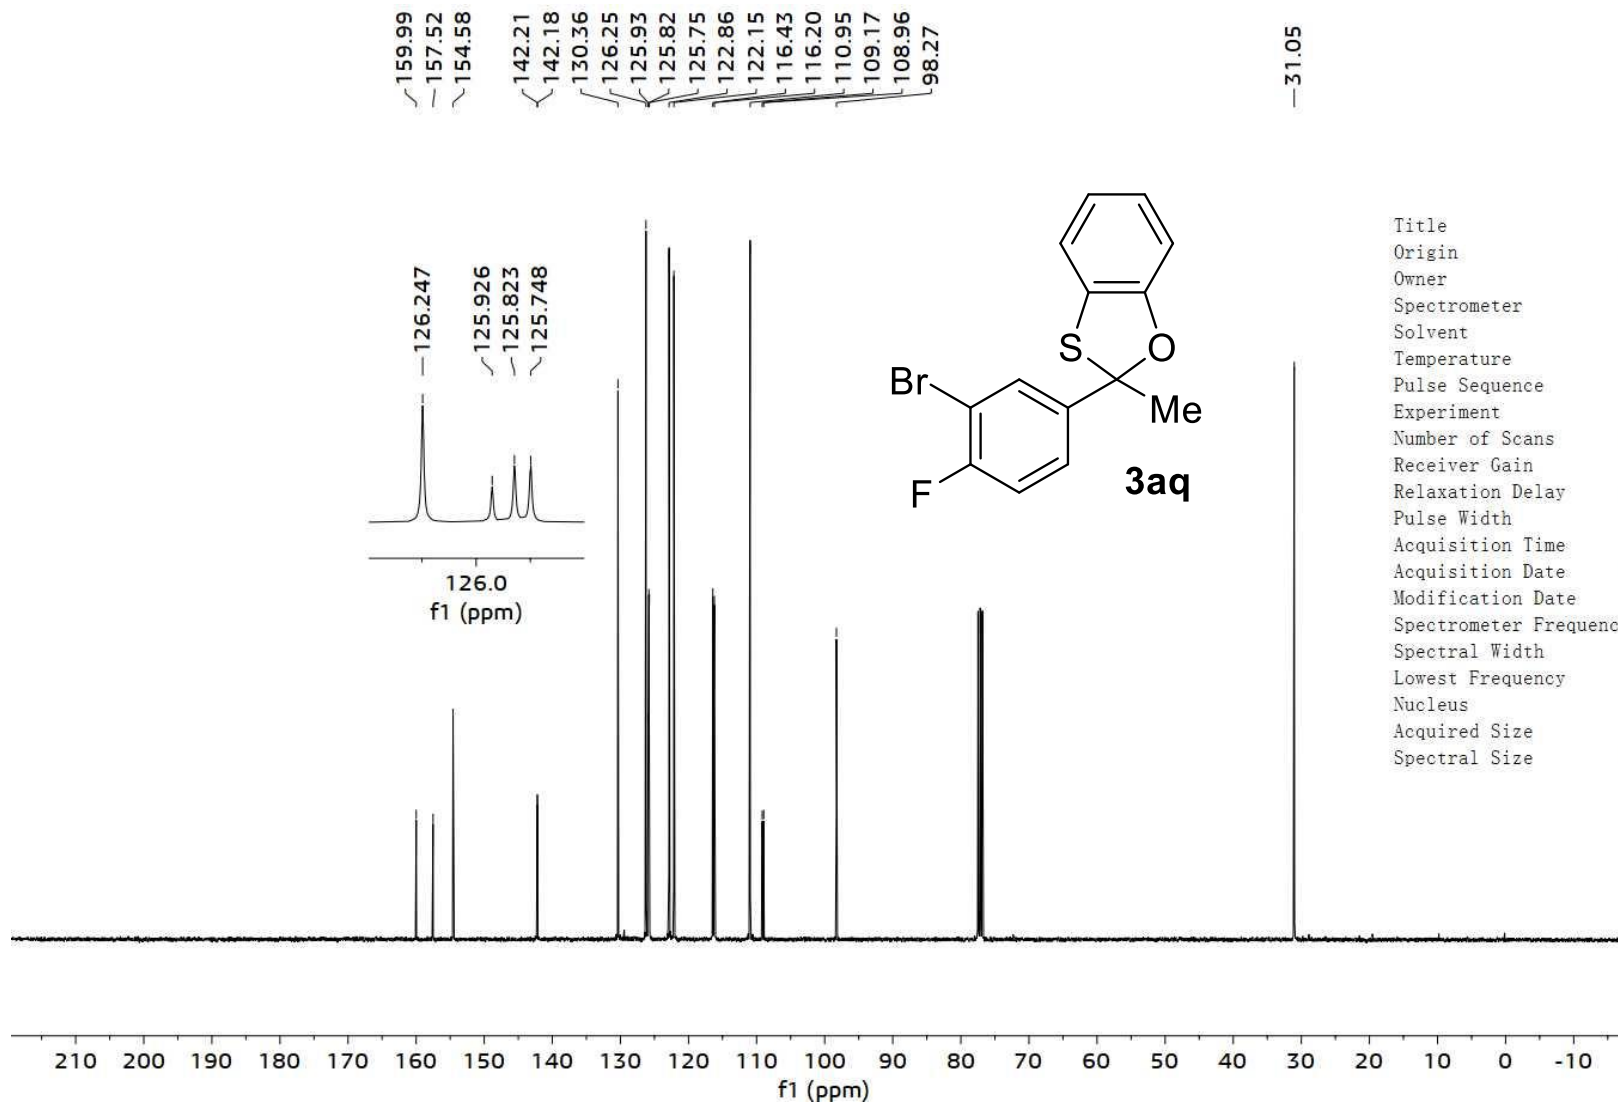

|                        |                     |
|------------------------|---------------------|
| Title                  | WYX-91-YL.3.fid     |
| Origin                 | Bruker BioSpin GmbH |
| Owner                  | nmrsu               |
| Spectrometer           | spect               |
| Solvent                | CDC13               |
| Temperature            | 298.4               |
| Pulse Sequence         | zgpg30              |
| Experiment             | 1D                  |
| Number of Scans        | 550                 |
| Receiver Gain          | 202                 |
| Relaxation Delay       | 2.0000              |
| Pulse Width            | 10.5800             |
| Acquisition Time       | 1.3631              |
| Acquisition Date       | 2021-09-16T00:24:43 |
| Modification Date      | 2021-09-16T00:24:44 |
| Spectrometer Frequency | 100.63              |
| Spectral Width         | 24038.5             |
| Lowest Frequency       | -1952.6             |
| Nucleus                | 13C                 |
| Acquired Size          | 32768               |
| Spectral Size          | 65536               |

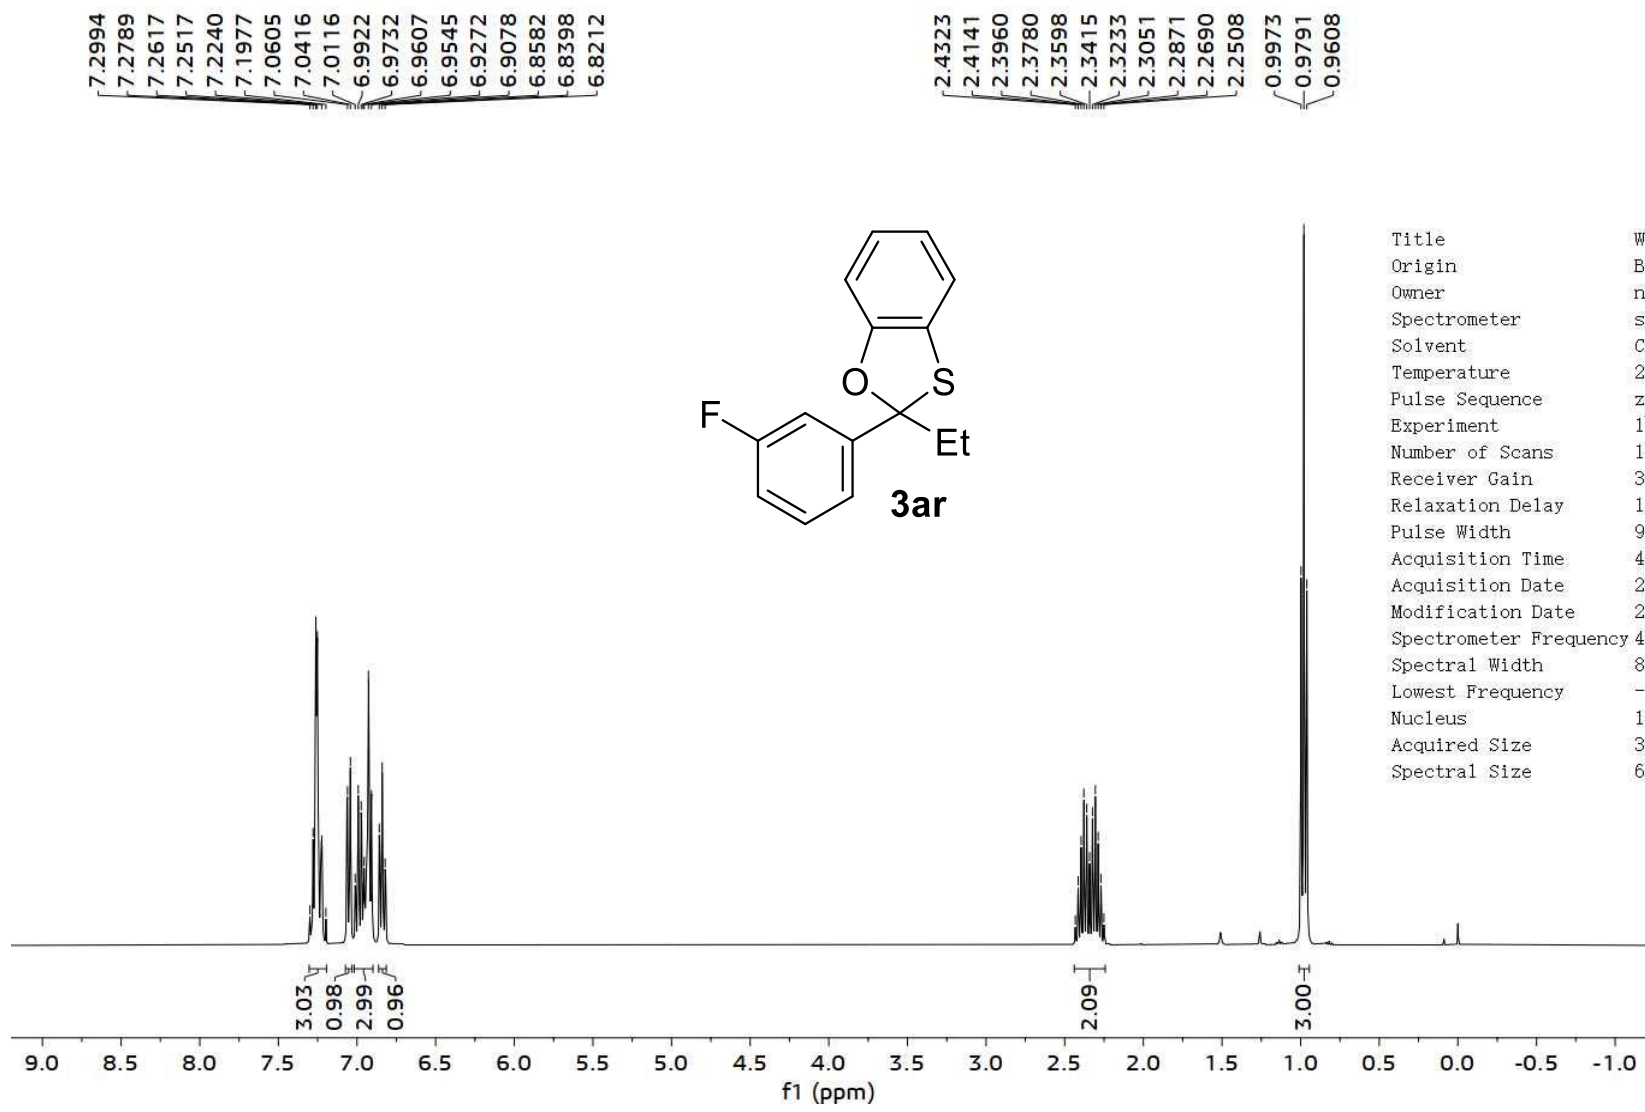

|                        |                     |
|------------------------|---------------------|
| Title                  | WYX-93-YL. 2.fid    |
| Origin                 | Bruker BioSpin GmbH |
| Owner                  | nmrsu               |
| Spectrometer           | spect               |
| Solvent                | CDC13               |
| Temperature            | 298.0               |
| Pulse Sequence         | zg30                |
| Experiment             | 1D                  |
| Number of Scans        | 16                  |
| Receiver Gain          | 31                  |
| Relaxation Delay       | 1.0000              |
| Pulse Width            | 9.7800              |
| Acquisition Time       | 4.0894              |
| Acquisition Date       | 2021-09-16T01:07:09 |
| Modification Date      | 2021-09-16T01:07:10 |
| Spectrometer Frequency | 400.15              |
| Spectral Width         | 8012.8              |
| Lowest Frequency       | -1570.4             |
| Nucleus                | 1H                  |
| Acquired Size          | 32768               |
| Spectral Size          | 65536               |

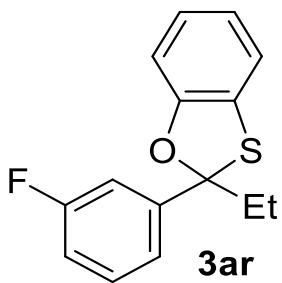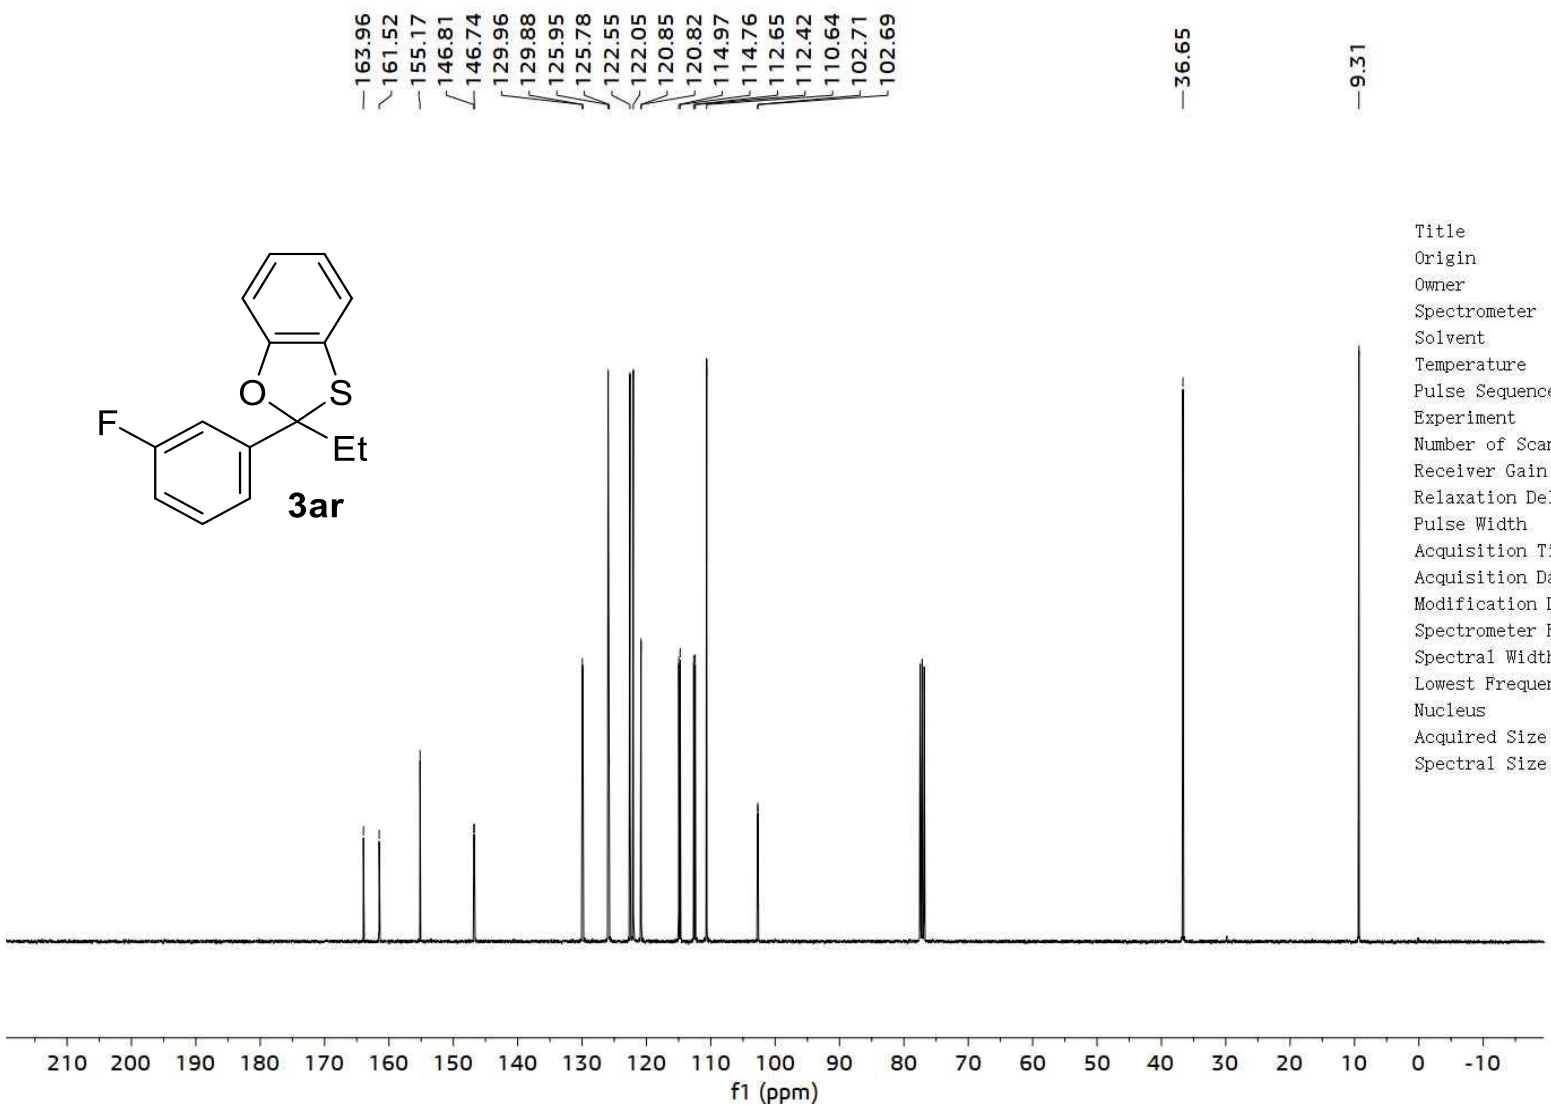

|                        |                     |
|------------------------|---------------------|
| Title                  | WYX-93-YL. 3. fid   |
| Origin                 | Bruker BioSpin GmbH |
| Owner                  | nmrsu               |
| Spectrometer           | spect               |
| Solvent                | CDC13               |
| Temperature            | 298.3               |
| Pulse Sequence         | zgpg30              |
| Experiment             | 1D                  |
| Number of Scans        | 550                 |
| Receiver Gain          | 202                 |
| Relaxation Delay       | 2.0000              |
| Pulse Width            | 10.5800             |
| Acquisition Time       | 1.3631              |
| Acquisition Date       | 2021-09-16T01:39:39 |
| Modification Date      | 2021-09-16T01:39:40 |
| Spectrometer Frequency | 100.63              |
| Spectral Width         | 24038.5             |
| Lowest Frequency       | -1953.3             |
| Nucleus                | 13C                 |
| Acquired Size          | 32768               |
| Spectral Size          | 65536               |

7.4904  
7.4692  
7.4096  
7.3883  
7.0654  
7.0622  
7.0464  
7.0431  
6.9992  
6.9960  
6.9800  
6.9768  
6.9610  
6.9577  
6.8132  
6.8103  
6.7945  
6.7915  
6.7756  
6.7726  
6.6734  
6.6705  
6.6542  
6.6509  
6.2985

—4.0268

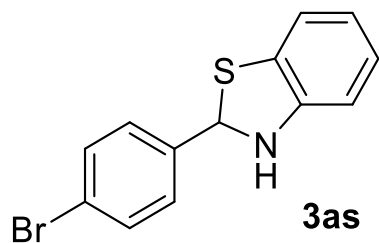

|                        |                     |
|------------------------|---------------------|
| Title                  | SN-1-yuanliao.1.fid |
| Origin                 | Bruker BioSpin GmbH |
| Owner                  | nmrsu               |
| Spectrometer           | spect               |
| Solvent                | CDCl3               |
| Temperature            | 301.7               |
| Pulse Sequence         | zg30                |
| Experiment             | 1D                  |
| Number of Scans        | 16                  |
| Receiver Gain          | 31                  |
| Relaxation Delay       | 1.0000              |
| Pulse Width            | 9.7800              |
| Acquisition Time       | 4.0894              |
| Acquisition Date       | 2021-08-02T15:23:39 |
| Modification Date      | 2021-08-02T15:23:40 |
| Spectrometer Frequency | 400.15              |
| Spectral Width         | 8012.8              |
| Lowest Frequency       | -1545.7             |
| Nucleus                | 1H                  |
| Acquired Size          | 32768               |
| Spectral Size          | 65536               |

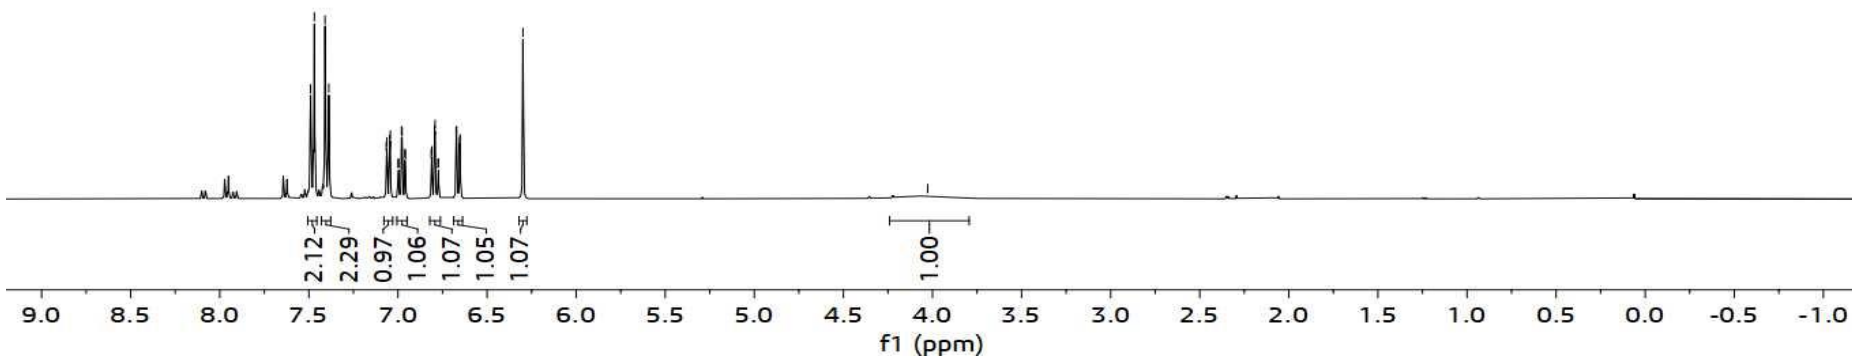

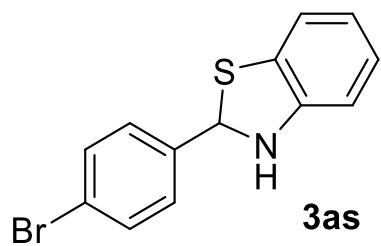

146.12  
 140.92  
 131.88  
 128.30  
 126.31  
 125.71  
 122.66  
 121.73  
 120.94  
 -109.95

-69.30

|                        |                     |
|------------------------|---------------------|
| Title                  | SN-1-yuanliao.2.fid |
| Origin                 | Bruker BioSpin GmbH |
| Owner                  | nmrsu               |
| Spectrometer           | spect               |
| Solvent                | CDC13               |
| Temperature            | 302.4               |
| Pulse Sequence         | zgpg30              |
| Experiment             | 1D                  |
| Number of Scans        | 1024                |
| Receiver Gain          | 202                 |
| Relaxation Delay       | 2.0000              |
| Pulse Width            | 10.5800             |
| Acquisition Time       | 1.3631              |
| Acquisition Date       | 2021-08-02T16:23:13 |
| Modification Date      | 2021-08-02T16:23:14 |
| Spectrometer Frequency | 100.63              |
| Spectral Width         | 24038.5             |
| Lowest Frequency       | -1959.9             |
| Nucleus                | <sup>13</sup> C     |
| Acquired Size          | 32768               |
| Spectral Size          | 65536               |

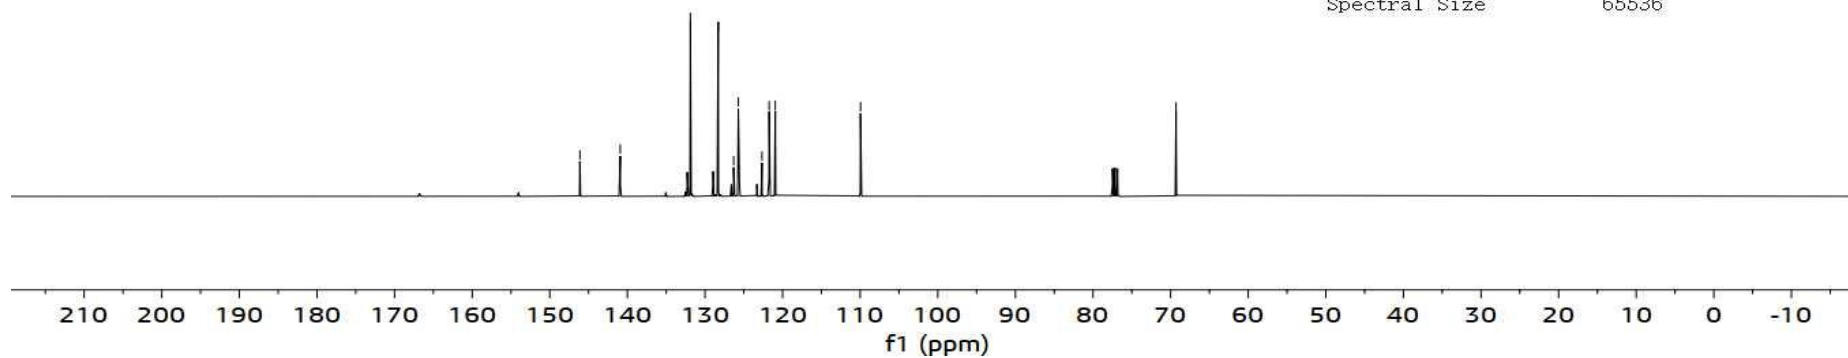

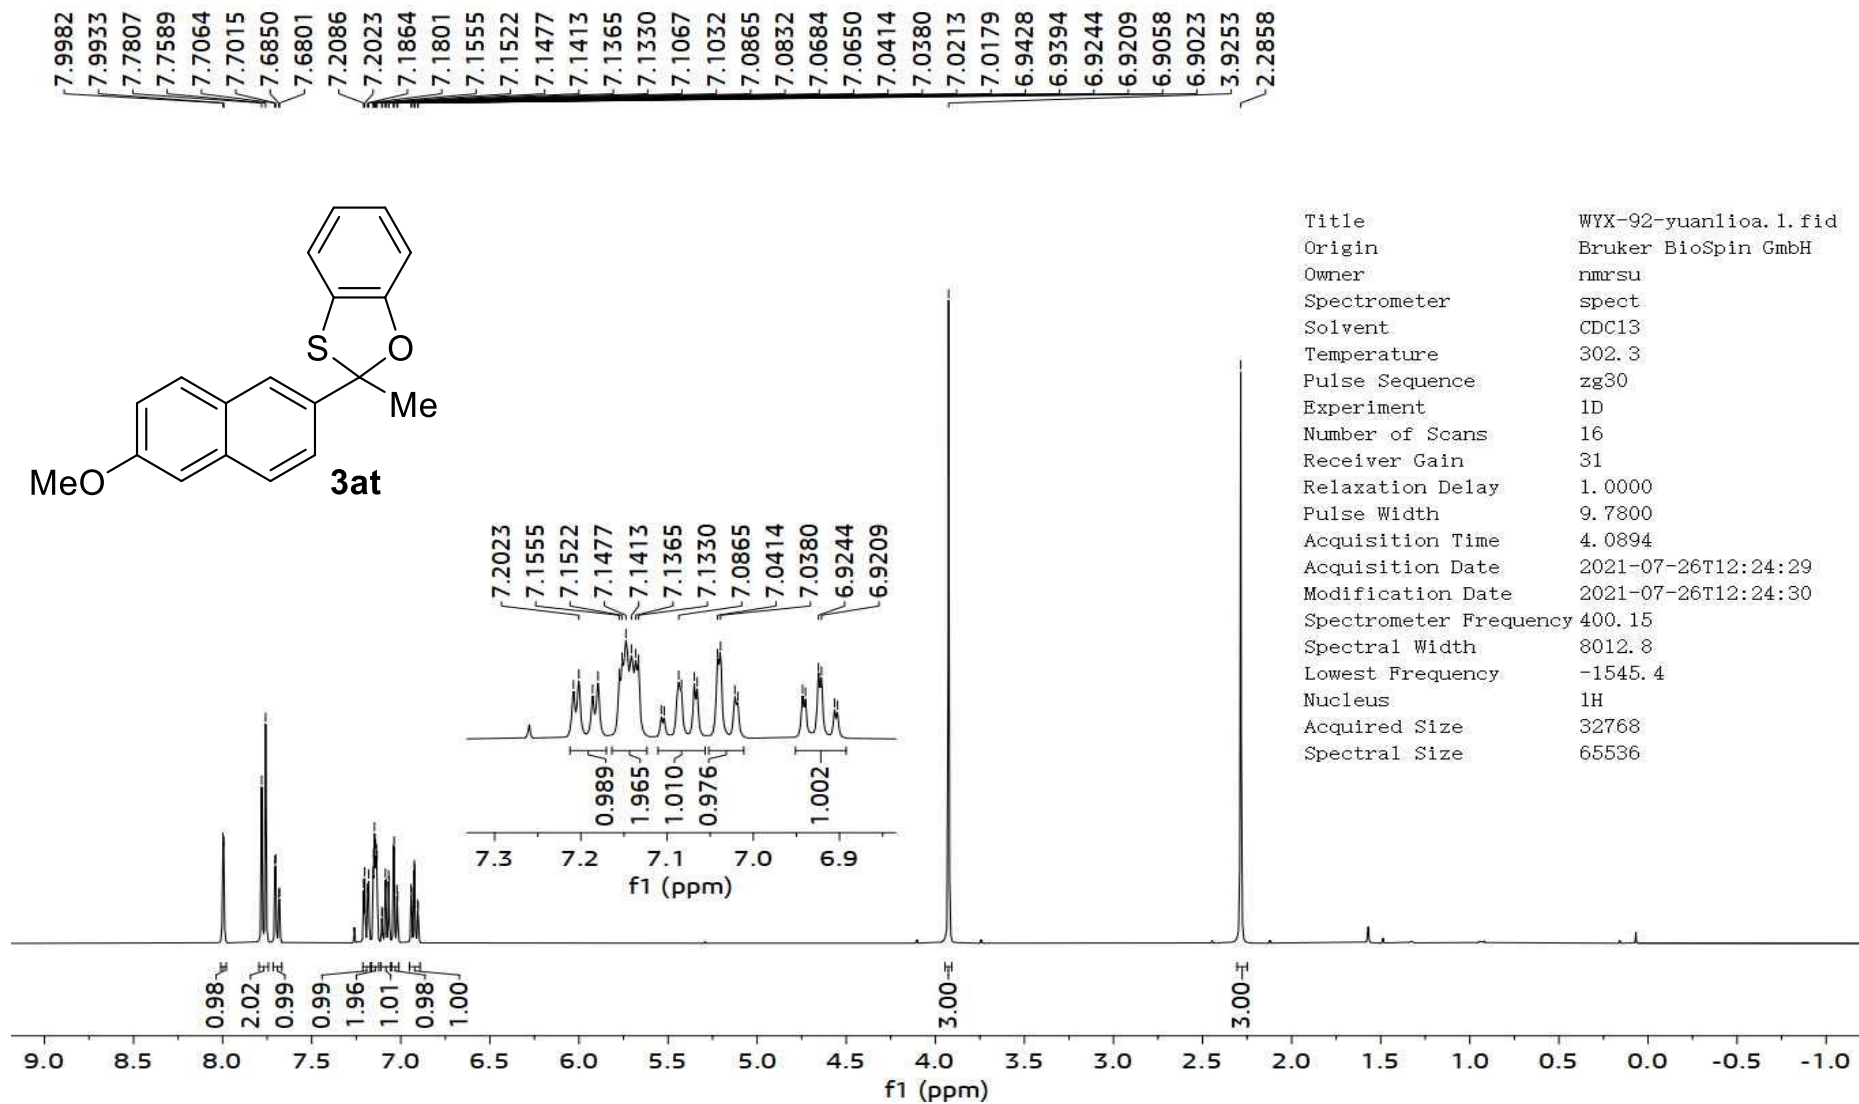



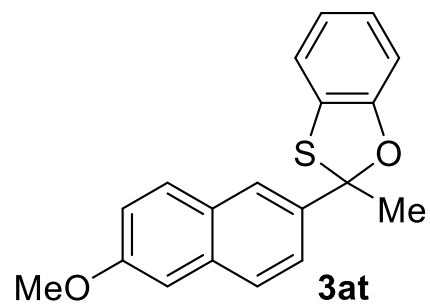

158.27  
 155.07  
 139.30  
 134.32  
 129.99  
 128.23  
 127.29  
 126.55  
 125.99  
 123.95  
 123.31  
 122.51  
 122.12  
 119.30  
 110.87  
 105.77  
 99.84

55.40

30.98

|                        |                       |
|------------------------|-----------------------|
| Title                  | WYX-92-yuanliao.2.fid |
| Origin                 | Bruker BioSpin GmbH   |
| Owner                  | nmrsu                 |
| Spectrometer           | spect                 |
| Solvent                | CDC13                 |
| Temperature            | 303.0                 |
| Pulse Sequence         | zgpg30                |
| Experiment             | 1D                    |
| Number of Scans        | 750                   |
| Receiver Gain          | 202                   |
| Relaxation Delay       | 2.0000                |
| Pulse Width            | 10.5800               |
| Acquisition Time       | 1.3631                |
| Acquisition Date       | 2021-07-26T13:08:25   |
| Modification Date      | 2021-07-26T13:08:26   |
| Spectrometer Frequency | 100.63                |
| Spectral Width         | 24038.5               |
| Lowest Frequency       | -1953.0               |
| Nucleus                | 13C                   |
| Acquired Size          | 32768                 |
| Spectral Size          | 65536                 |

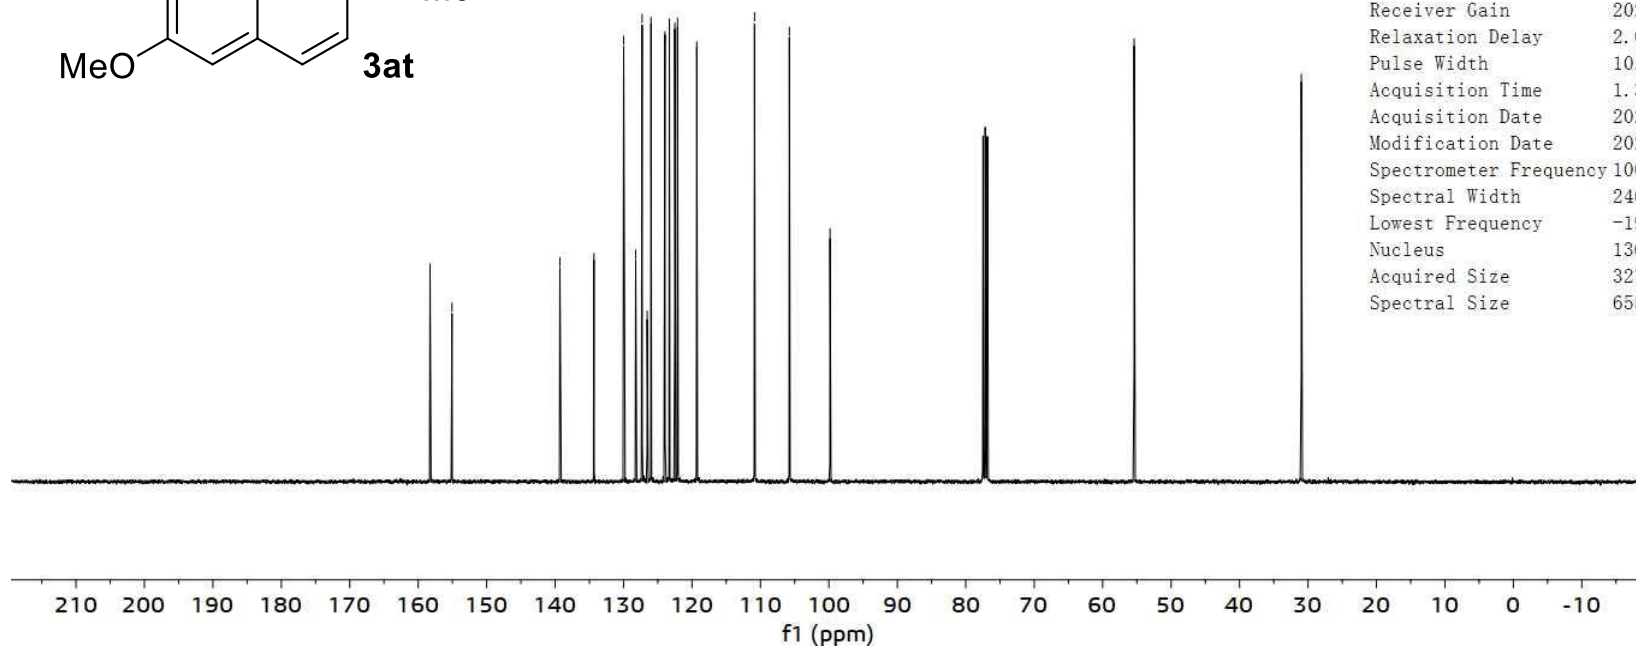

7.4242  
7.4039  
7.3813  
7.3612  
7.1832  
7.1634  
7.1417  
7.1218  
5.7976  
5.5373  
4.2859  
4.2816  
4.2681  
4.2641  
4.2505  
4.2464  
4.2332  
4.2289  
4.2191  
4.2157  
4.2115  
4.2036  
4.1877  
4.1715  
3.9772  
3.9593  
3.9548  
3.9371  
3.4767  
3.4589  
3.4510  
3.4333  
3.4010  
3.3831  
3.3746  
3.3567  
3.2060  
3.1915  
3.1796  
3.1650  
3.1263  
3.1039  
3.1005  
3.0785  
2.6924  
2.3489  
2.3273  
1.3243  
1.3199  
1.3064  
1.3032  
1.2885  
1.2845

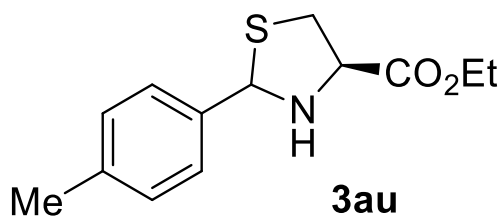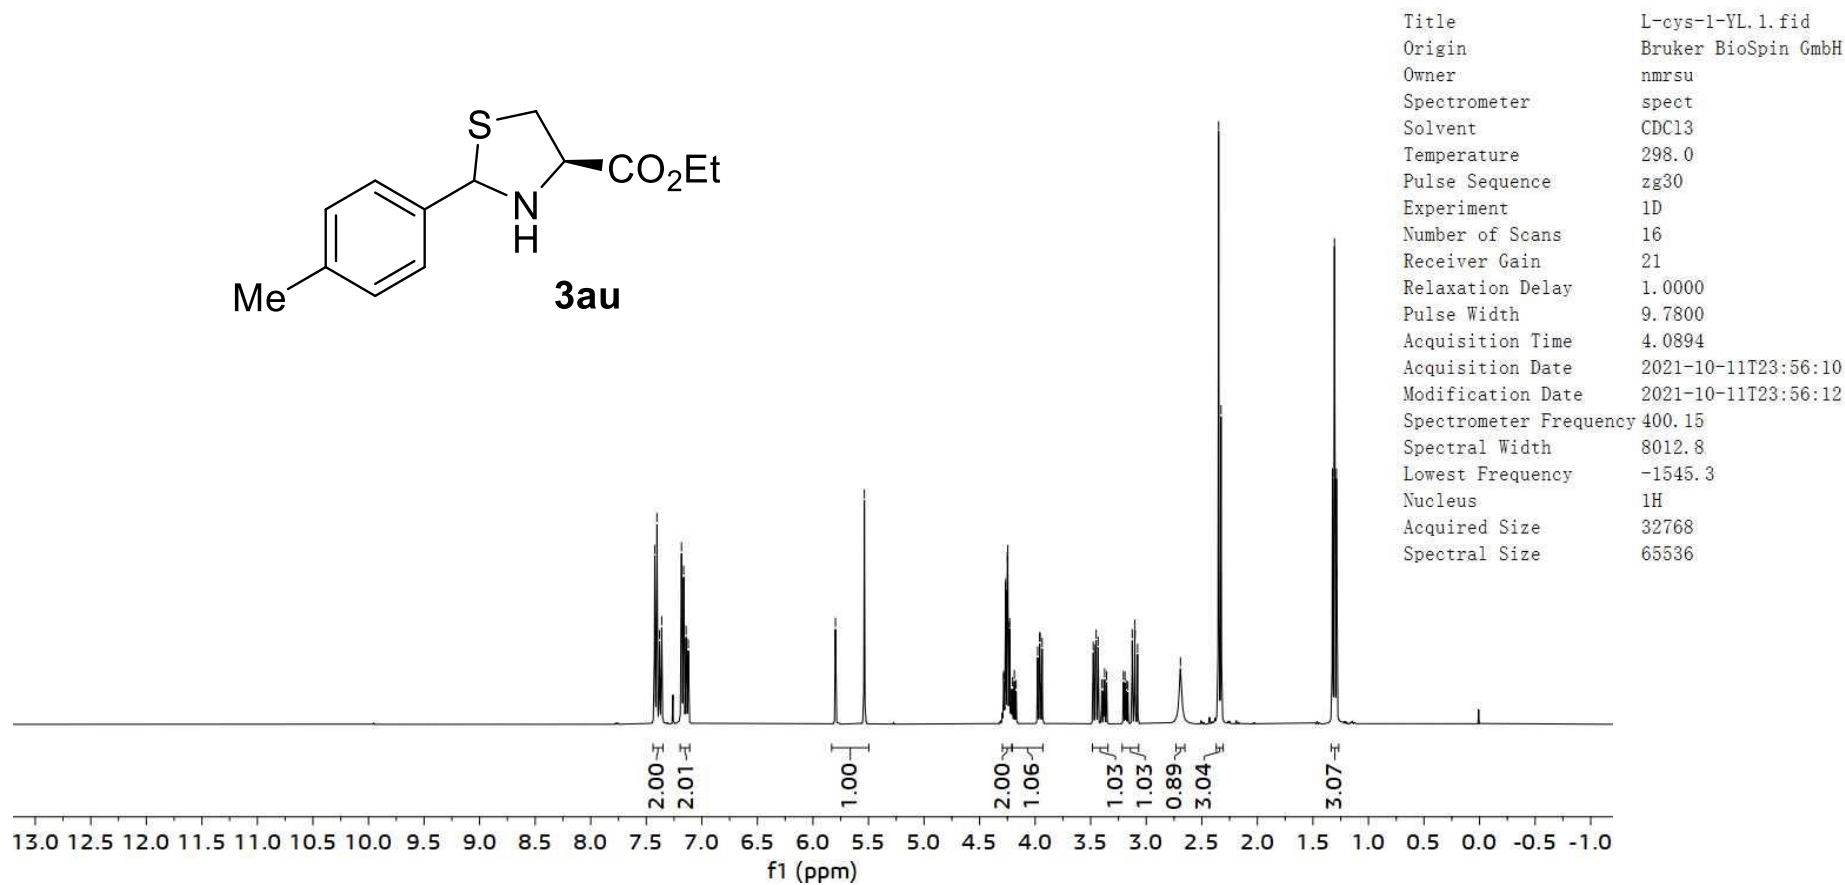

|                        |                     |
|------------------------|---------------------|
| Title                  | L-cys-1-YL.1.fid    |
| Origin                 | Bruker BioSpin GmbH |
| Owner                  | nmrsu               |
| Spectrometer           | spect               |
| Solvent                | CDC13               |
| Temperature            | 298.0               |
| Pulse Sequence         | zg30                |
| Experiment             | 1D                  |
| Number of Scans        | 16                  |
| Receiver Gain          | 21                  |
| Relaxation Delay       | 1.0000              |
| Pulse Width            | 9.7800              |
| Acquisition Time       | 4.0894              |
| Acquisition Date       | 2021-10-11T23:56:10 |
| Modification Date      | 2021-10-11T23:56:12 |
| Spectrometer Frequency | 400.15              |
| Spectral Width         | 8012.8              |
| Lowest Frequency       | -1545.3             |
| Nucleus                | <sup>1</sup> H      |
| Acquired Size          | 32768               |
| Spectral Size          | 65536               |

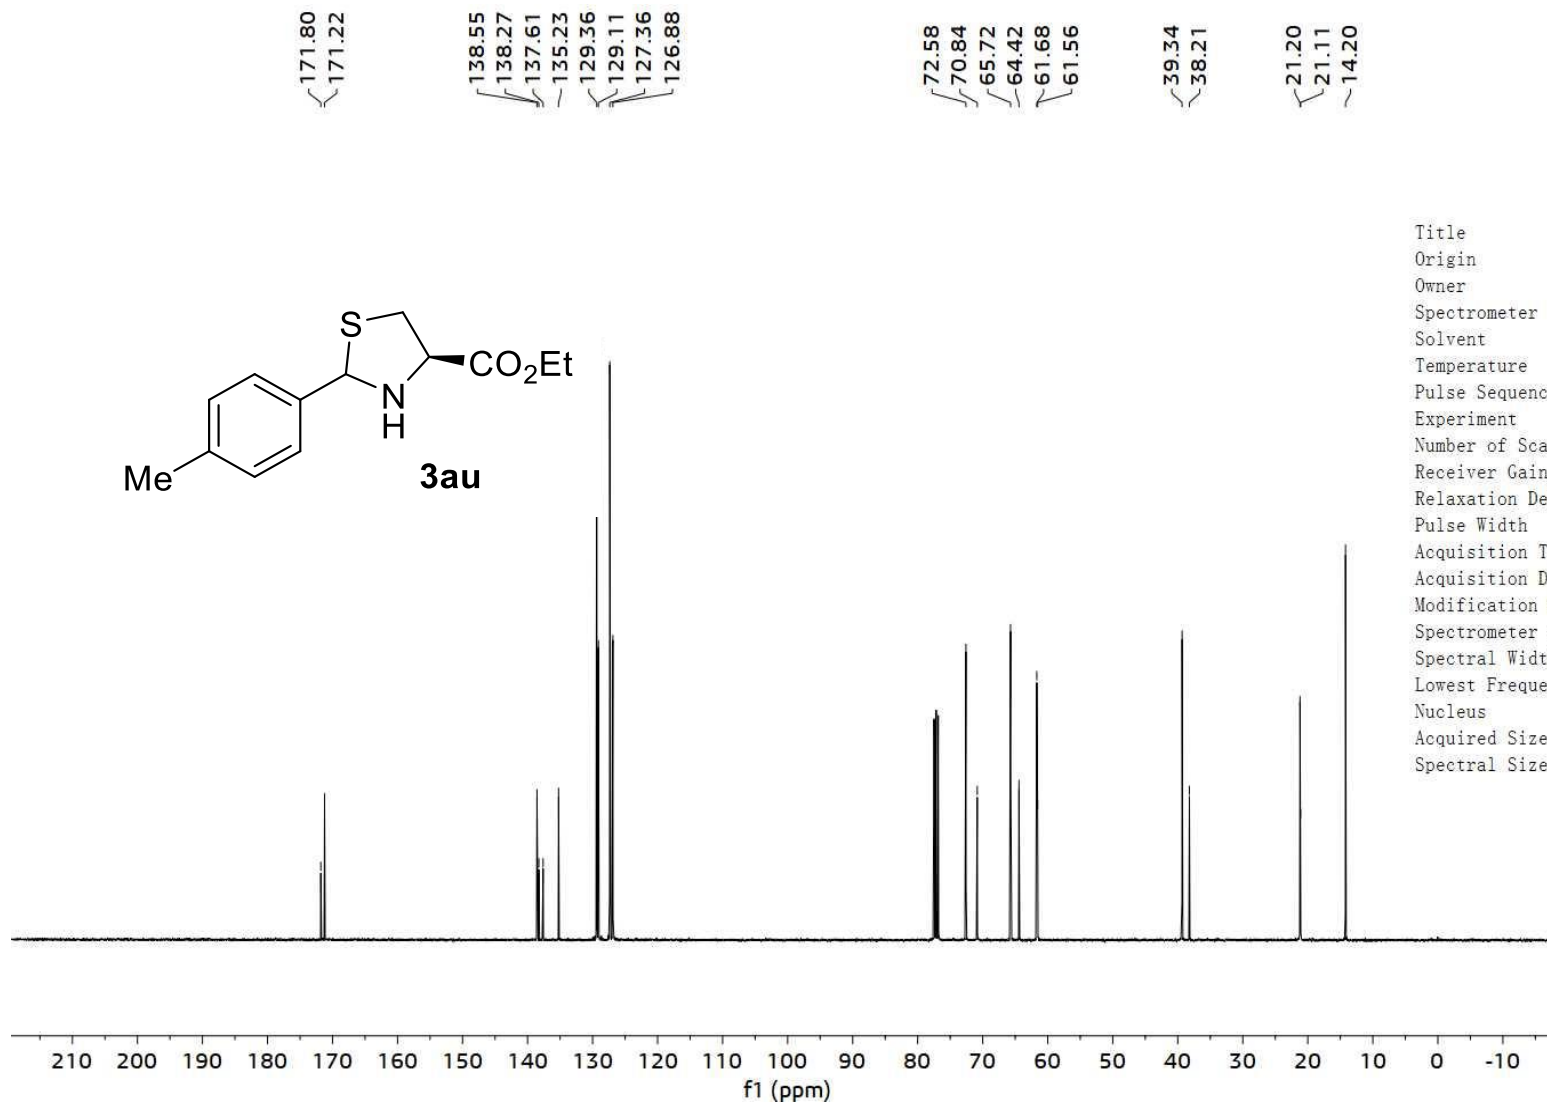

|                        |                     |
|------------------------|---------------------|
| Title                  | L-cys-1-YL.2.fid    |
| Origin                 | Bruker BioSpin GmbH |
| Owner                  | nmrsu               |
| Spectrometer           | spect               |
| Solvent                | CDC13               |
| Temperature            | 298.0               |
| Pulse Sequence         | zgpg30              |
| Experiment             | 1D                  |
| Number of Scans        | 700                 |
| Receiver Gain          | 202                 |
| Relaxation Delay       | 2.0000              |
| Pulse Width            | 10.5800             |
| Acquisition Time       | 1.3631              |
| Acquisition Date       | 2021-10-12T00:37:13 |
| Modification Date      | 2021-10-12T00:37:14 |
| Spectrometer Frequency | 100.63              |
| Spectral Width         | 24038.5             |
| Lowest Frequency       | -1957.8             |
| Nucleus                | 13C                 |
| Acquired Size          | 32768               |
| Spectral Size          | 65536               |

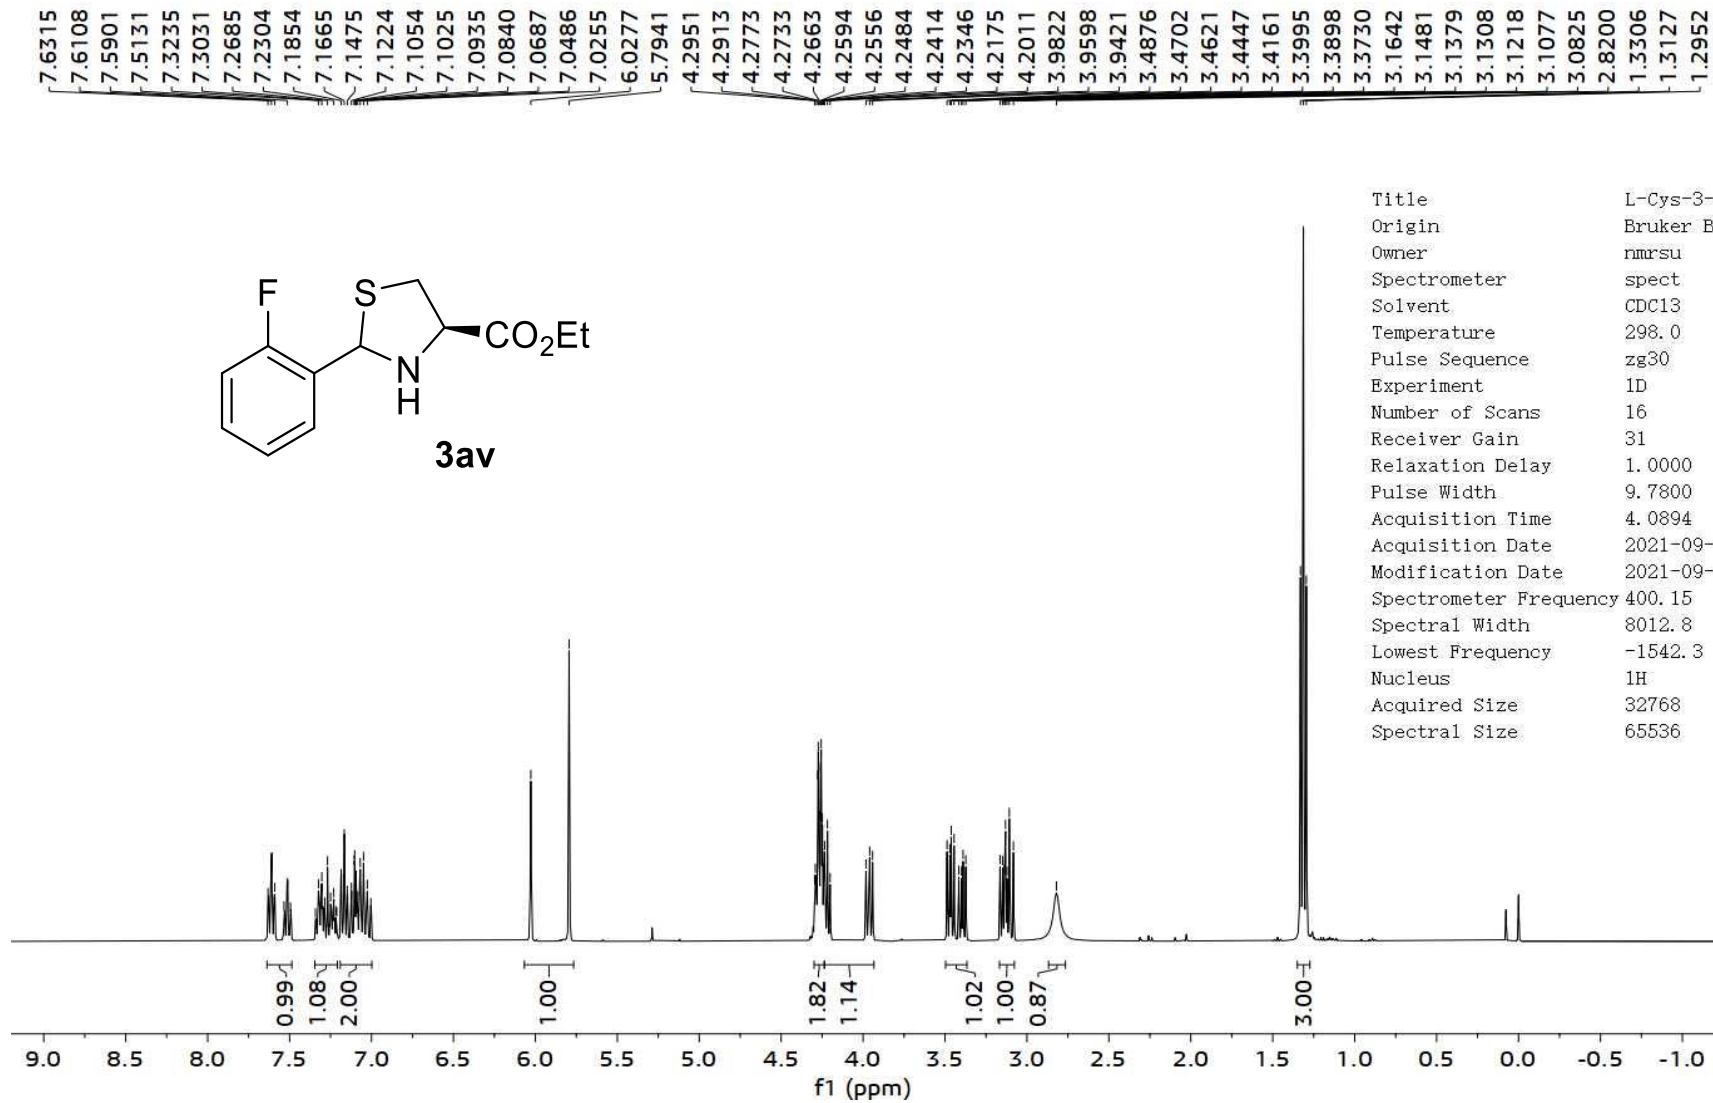

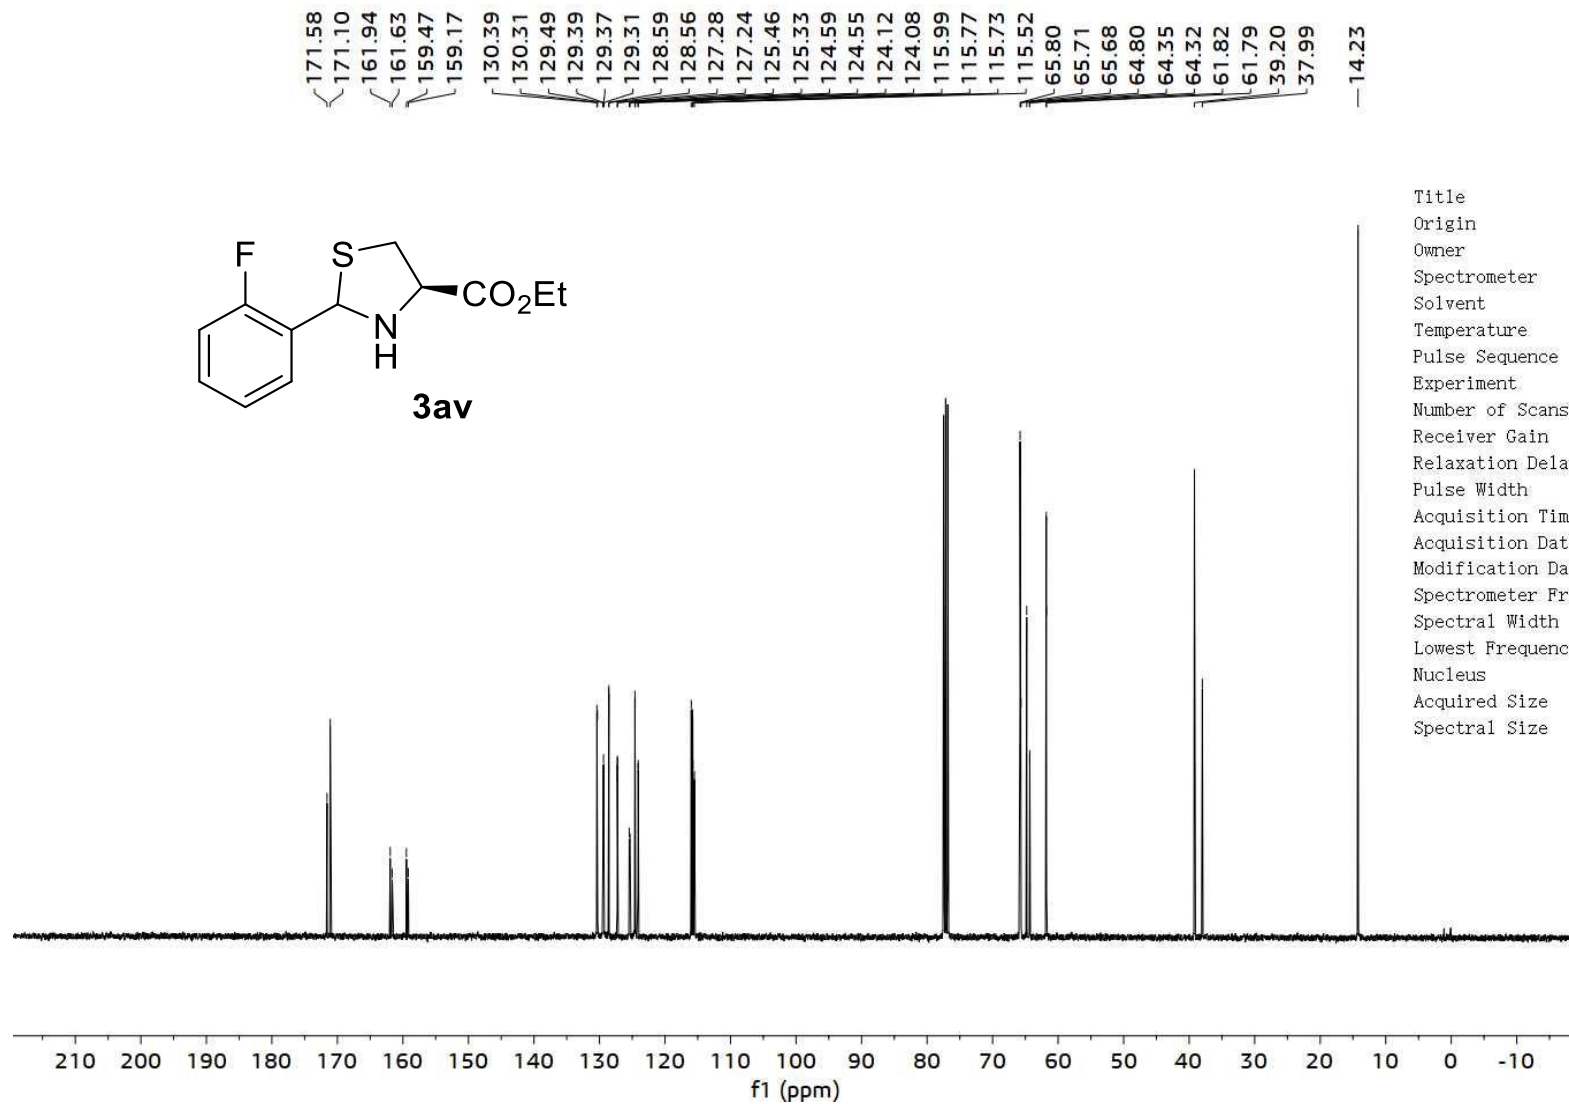

|                        |                     |
|------------------------|---------------------|
| Title                  | L-Cys-3-YL. 2. fid  |
| Origin                 | Bruker BioSpin GmbH |
| Owner                  | nmrsu               |
| Spectrometer           | spect               |
| Solvent                | CDC13               |
| Temperature            | 298.0               |
| Pulse Sequence         | zgpg30              |
| Experiment             | 1D                  |
| Number of Scans        | 700                 |
| Receiver Gain          | 202                 |
| Relaxation Delay       | 2.0000              |
| Pulse Width            | 10.5800             |
| Acquisition Time       | 1.3631              |
| Acquisition Date       | 2021-09-23T23:58:46 |
| Modification Date      | 2021-09-23T23:58:46 |
| Spectrometer Frequency | 100.63              |
| Spectral Width         | 24038.5             |
| Lowest Frequency       | -1951.5             |
| Nucleus                | 13C                 |
| Acquired Size          | 32768               |
| Spectral Size          | 65536               |

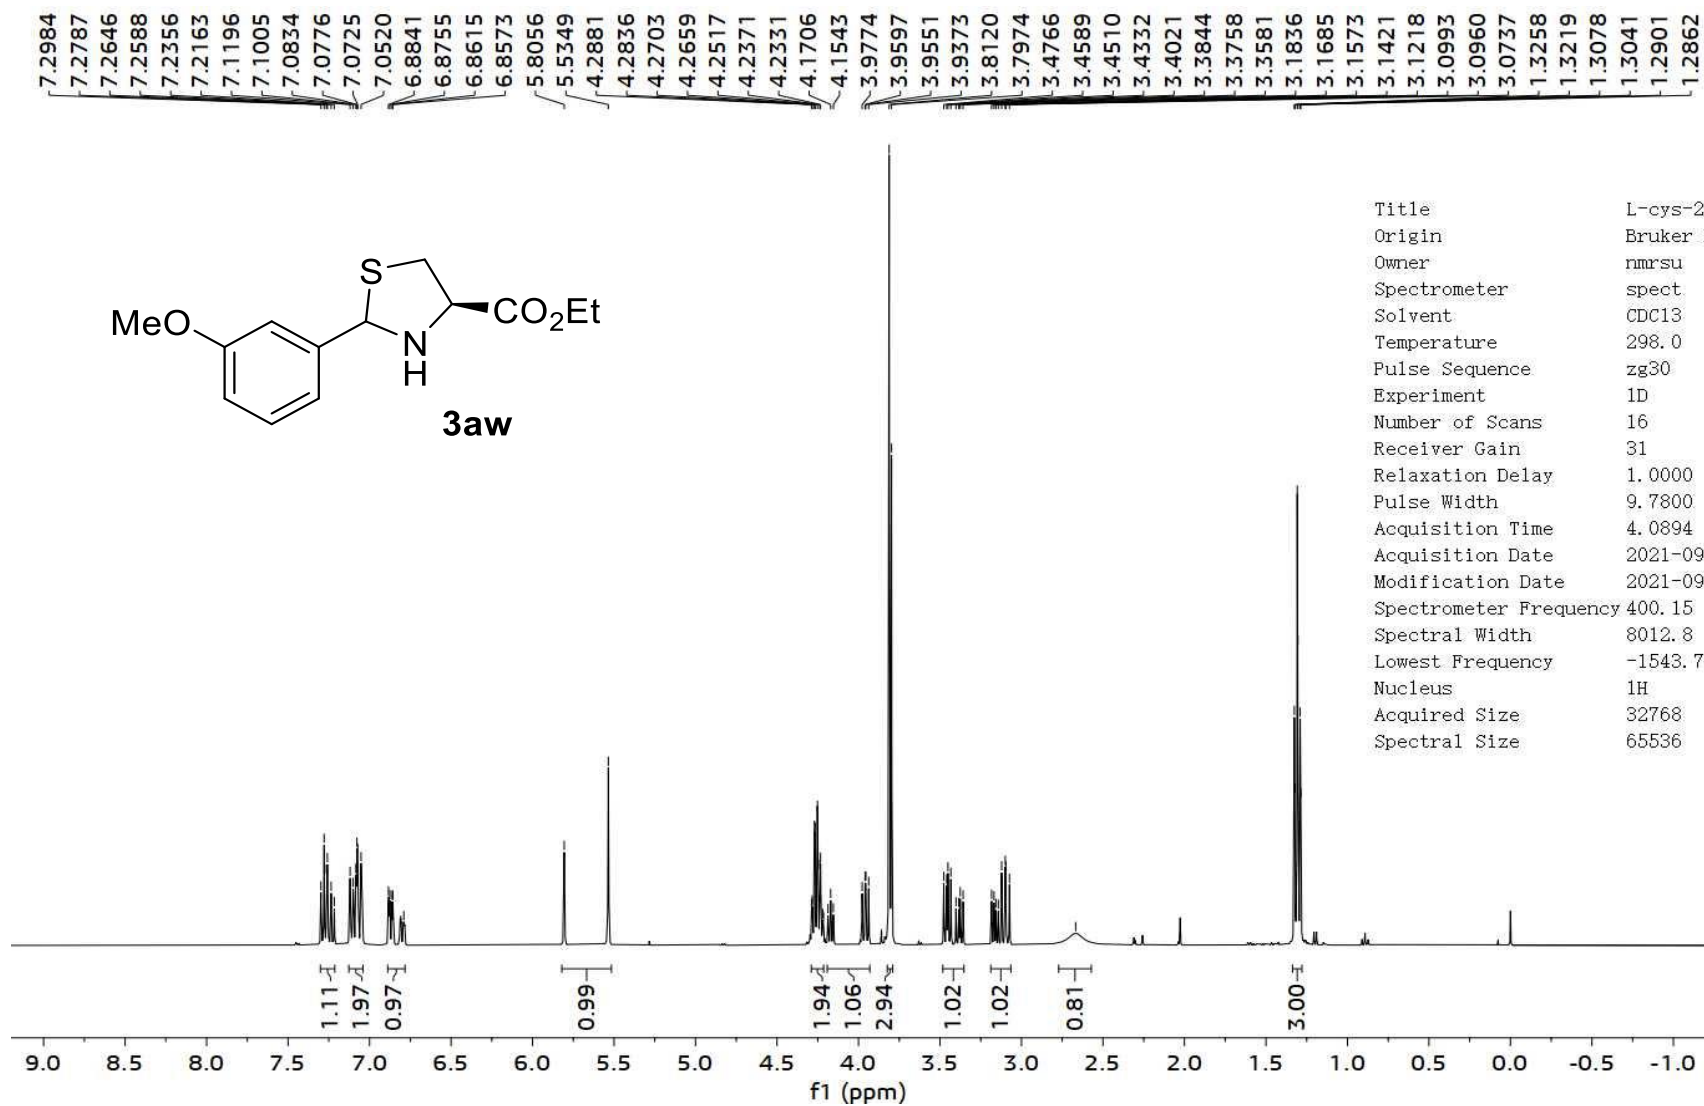

|                        |                     |
|------------------------|---------------------|
| Title                  | L-cys-2.1.fid       |
| Origin                 | Bruker BioSpin GmbH |
| Owner                  | nmrsu               |
| Spectrometer           | spect               |
| Solvent                | CDC13               |
| Temperature            | 298.0               |
| Pulse Sequence         | zg30                |
| Experiment             | 1D                  |
| Number of Scans        | 16                  |
| Receiver Gain          | 31                  |
| Relaxation Delay       | 1.0000              |
| Pulse Width            | 9.7800              |
| Acquisition Time       | 4.0894              |
| Acquisition Date       | 2021-09-22T23:37:58 |
| Modification Date      | 2021-09-22T23:37:58 |
| Spectrometer Frequency | 400.15              |
| Spectral Width         | 8012.8              |
| Lowest Frequency       | -1543.7             |
| Nucleus                | <sup>1</sup> H      |
| Acquired Size          | 32768               |
| Spectral Size          | 65536               |

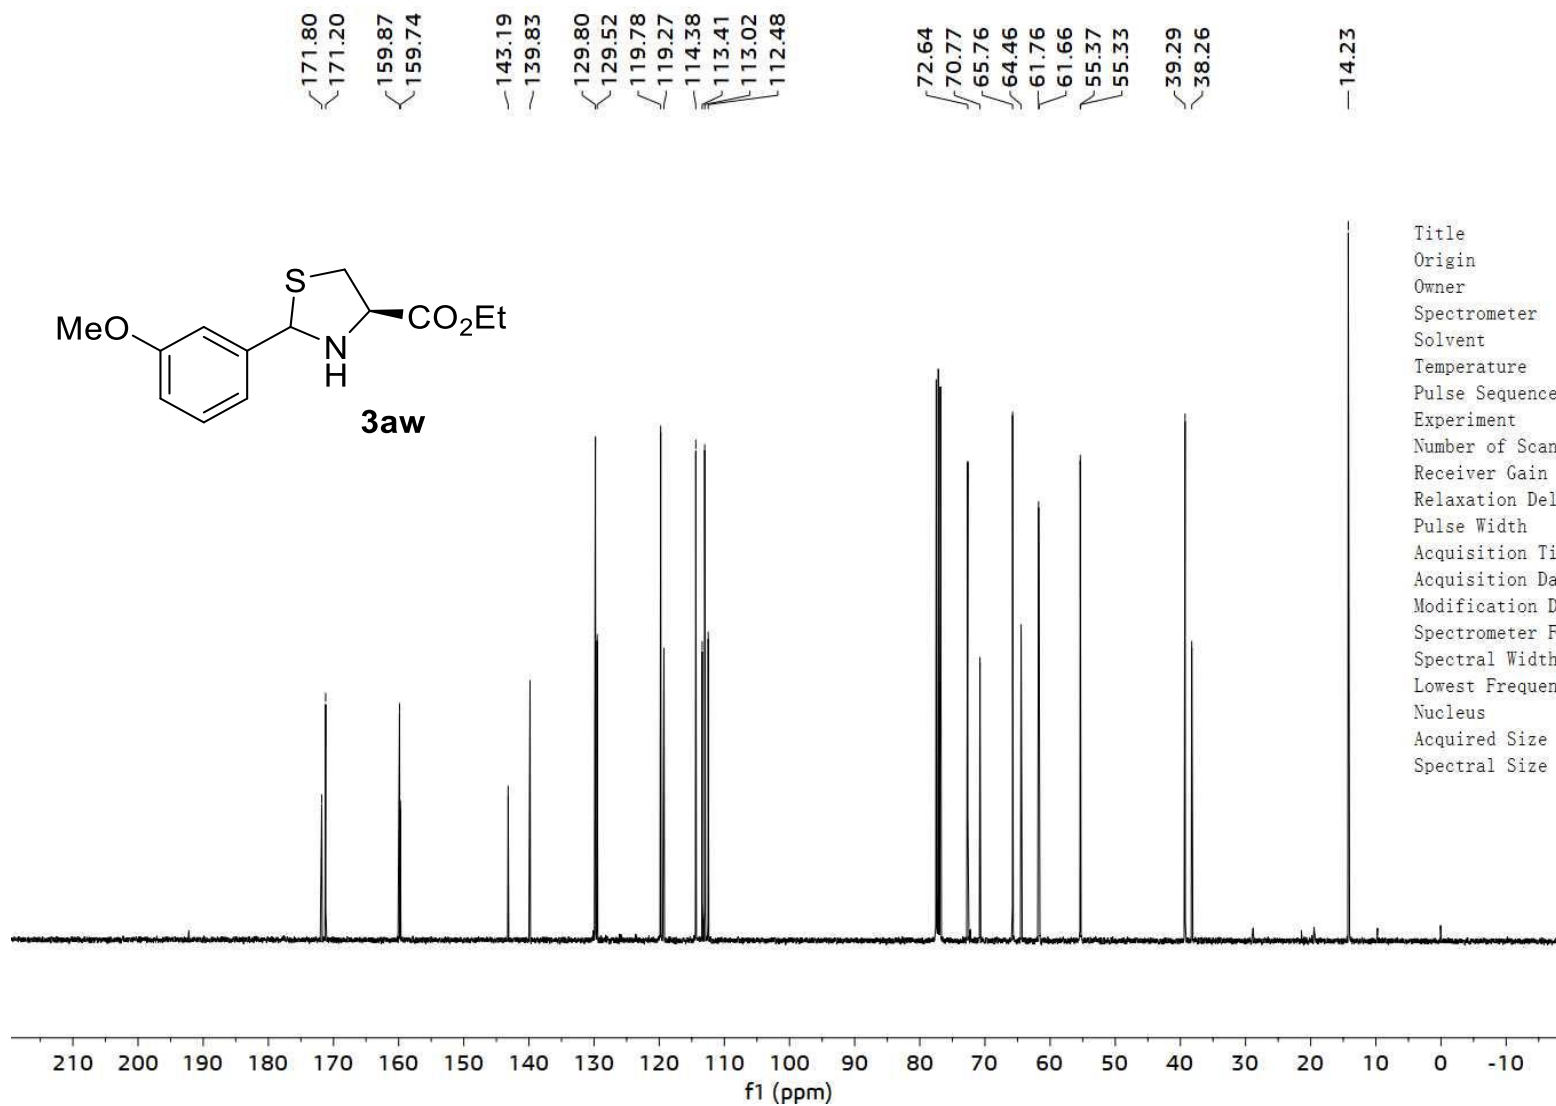

|                        |                     |
|------------------------|---------------------|
| Title                  | L-cys-2.2.fid       |
| Origin                 | Bruker BioSpin GmbH |
| Owner                  | nmrsu               |
| Spectrometer           | spect               |
| Solvent                | CDC13               |
| Temperature            | 298.0               |
| Pulse Sequence         | zgpg30              |
| Experiment             | 1D                  |
| Number of Scans        | 1024                |
| Receiver Gain          | 202                 |
| Relaxation Delay       | 2.0000              |
| Pulse Width            | 10.5800             |
| Acquisition Time       | 1.3631              |
| Acquisition Date       | 2021-09-23T00:37:33 |
| Modification Date      | 2021-09-23T00:37:32 |
| Spectrometer Frequency | 100.63              |
| Spectral Width         | 24038.5             |
| Lowest Frequency       | -1952.6             |
| Nucleus                | 13C                 |
| Acquired Size          | 32768               |
| Spectral Size          | 65536               |

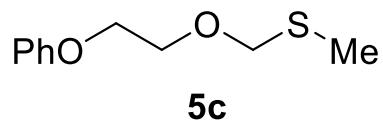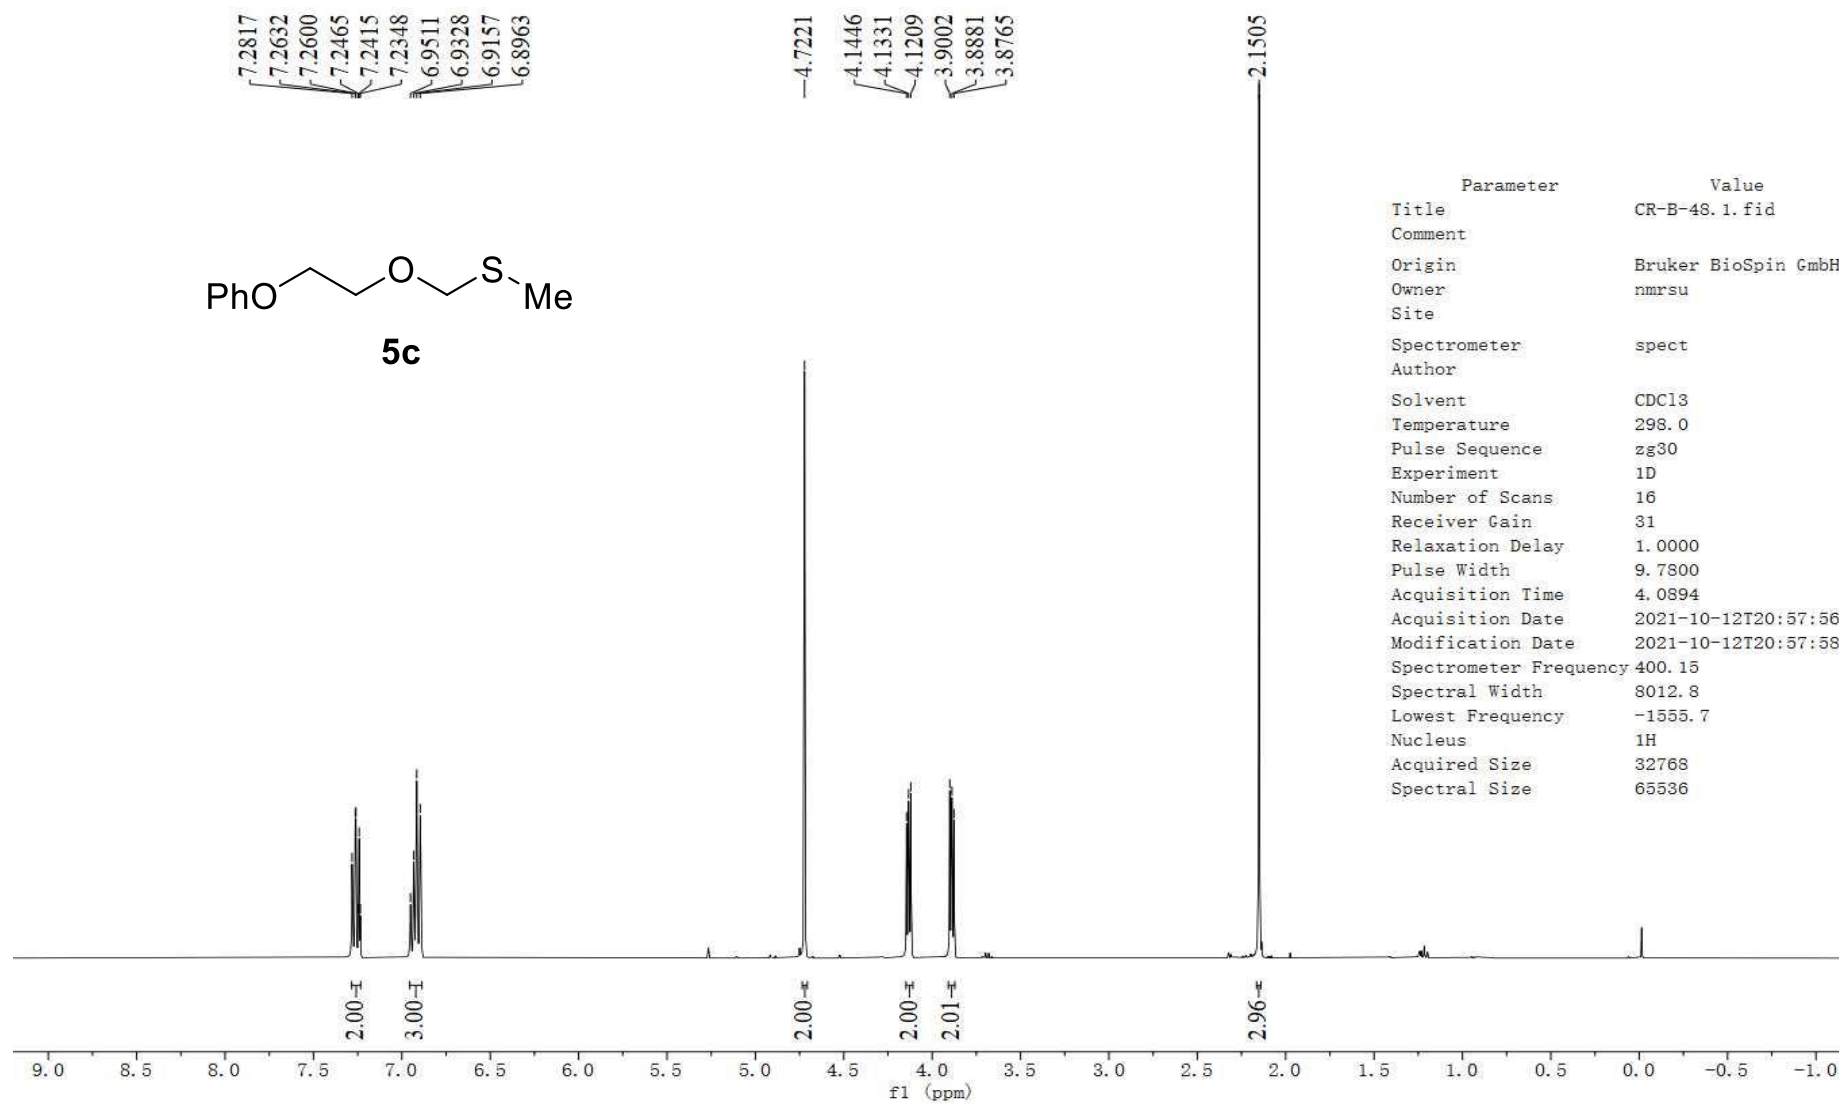

| Parameter              | Value               |
|------------------------|---------------------|
| Title                  | CR-B-48. 1. fid     |
| Comment                |                     |
| Origin                 | Bruker BioSpin GmbH |
| Owner                  | nrsu                |
| Site                   |                     |
| Spectrometer           | spect               |
| Author                 |                     |
| Solvent                | CDCl3               |
| Temperature            | 298.0               |
| Pulse Sequence         | zg30                |
| Experiment             | 1D                  |
| Number of Scans        | 16                  |
| Receiver Gain          | 31                  |
| Relaxation Delay       | 1.0000              |
| Pulse Width            | 9.7800              |
| Acquisition Time       | 4.0894              |
| Acquisition Date       | 2021-10-12T20:57:56 |
| Modification Date      | 2021-10-12T20:57:58 |
| Spectrometer Frequency | 400.15              |
| Spectral Width         | 8012.8              |
| Lowest Frequency       | -1555.7             |
| Nucleus                | 1H                  |
| Acquired Size          | 32768               |
| Spectral Size          | 65536               |



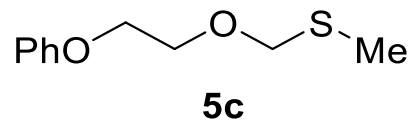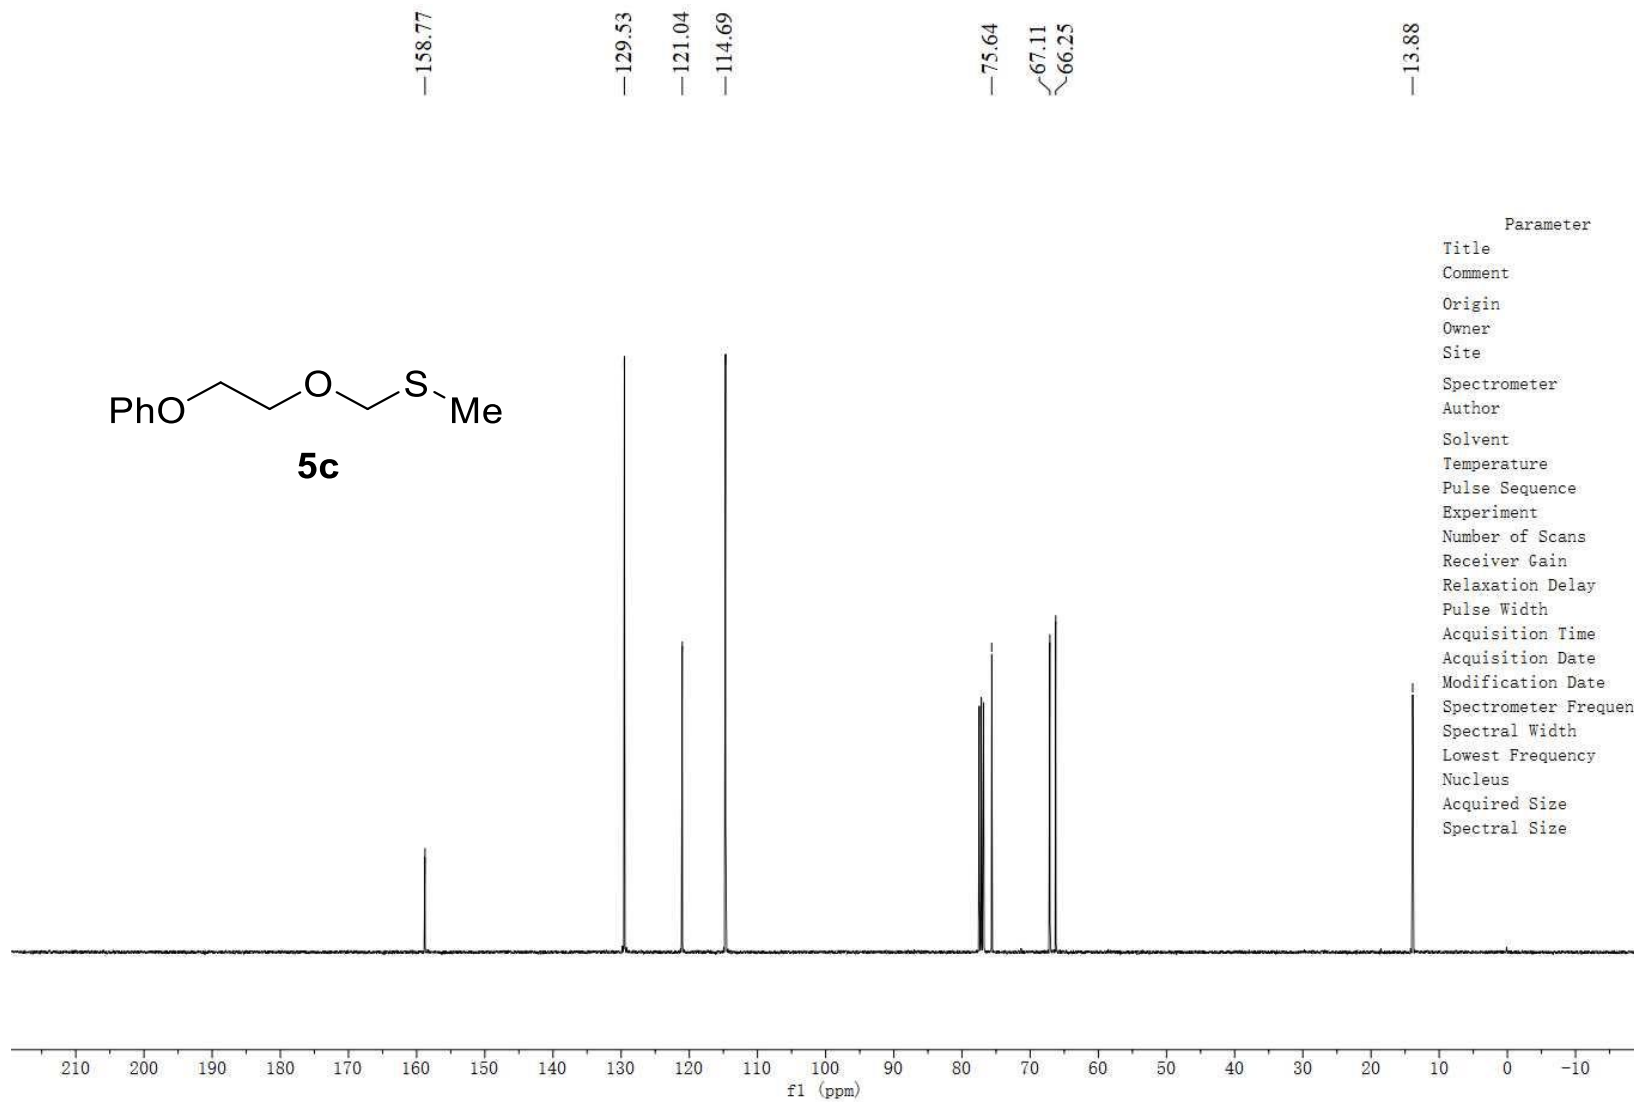

| Parameter              | Value               |
|------------------------|---------------------|
| Title                  | CR-B-48.2.fid       |
| Comment                |                     |
| Origin                 | Bruker BioSpin GmbH |
| Owner                  | nmrsu               |
| Site                   |                     |
| Spectrometer           | spect               |
| Author                 |                     |
| Solvent                | CDC13               |
| Temperature            | 298.0               |
| Pulse Sequence         | zgpg30              |
| Experiment             | 1D                  |
| Number of Scans        | 600                 |
| Receiver Gain          | 202                 |
| Relaxation Delay       | 2.0000              |
| Pulse Width            | 10.5800             |
| Acquisition Time       | 1.3631              |
| Acquisition Date       | 2021-10-12T21:33:16 |
| Modification Date      | 2021-10-12T21:33:18 |
| Spectrometer Frequency | 100.63              |
| Spectral Width         | 24038.5             |
| Lowest Frequency       | -1949.7             |
| Nucleus                | 13C                 |
| Acquired Size          | 32768               |
| Spectral Size          | 65536               |

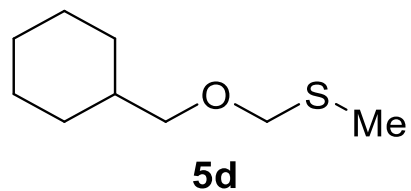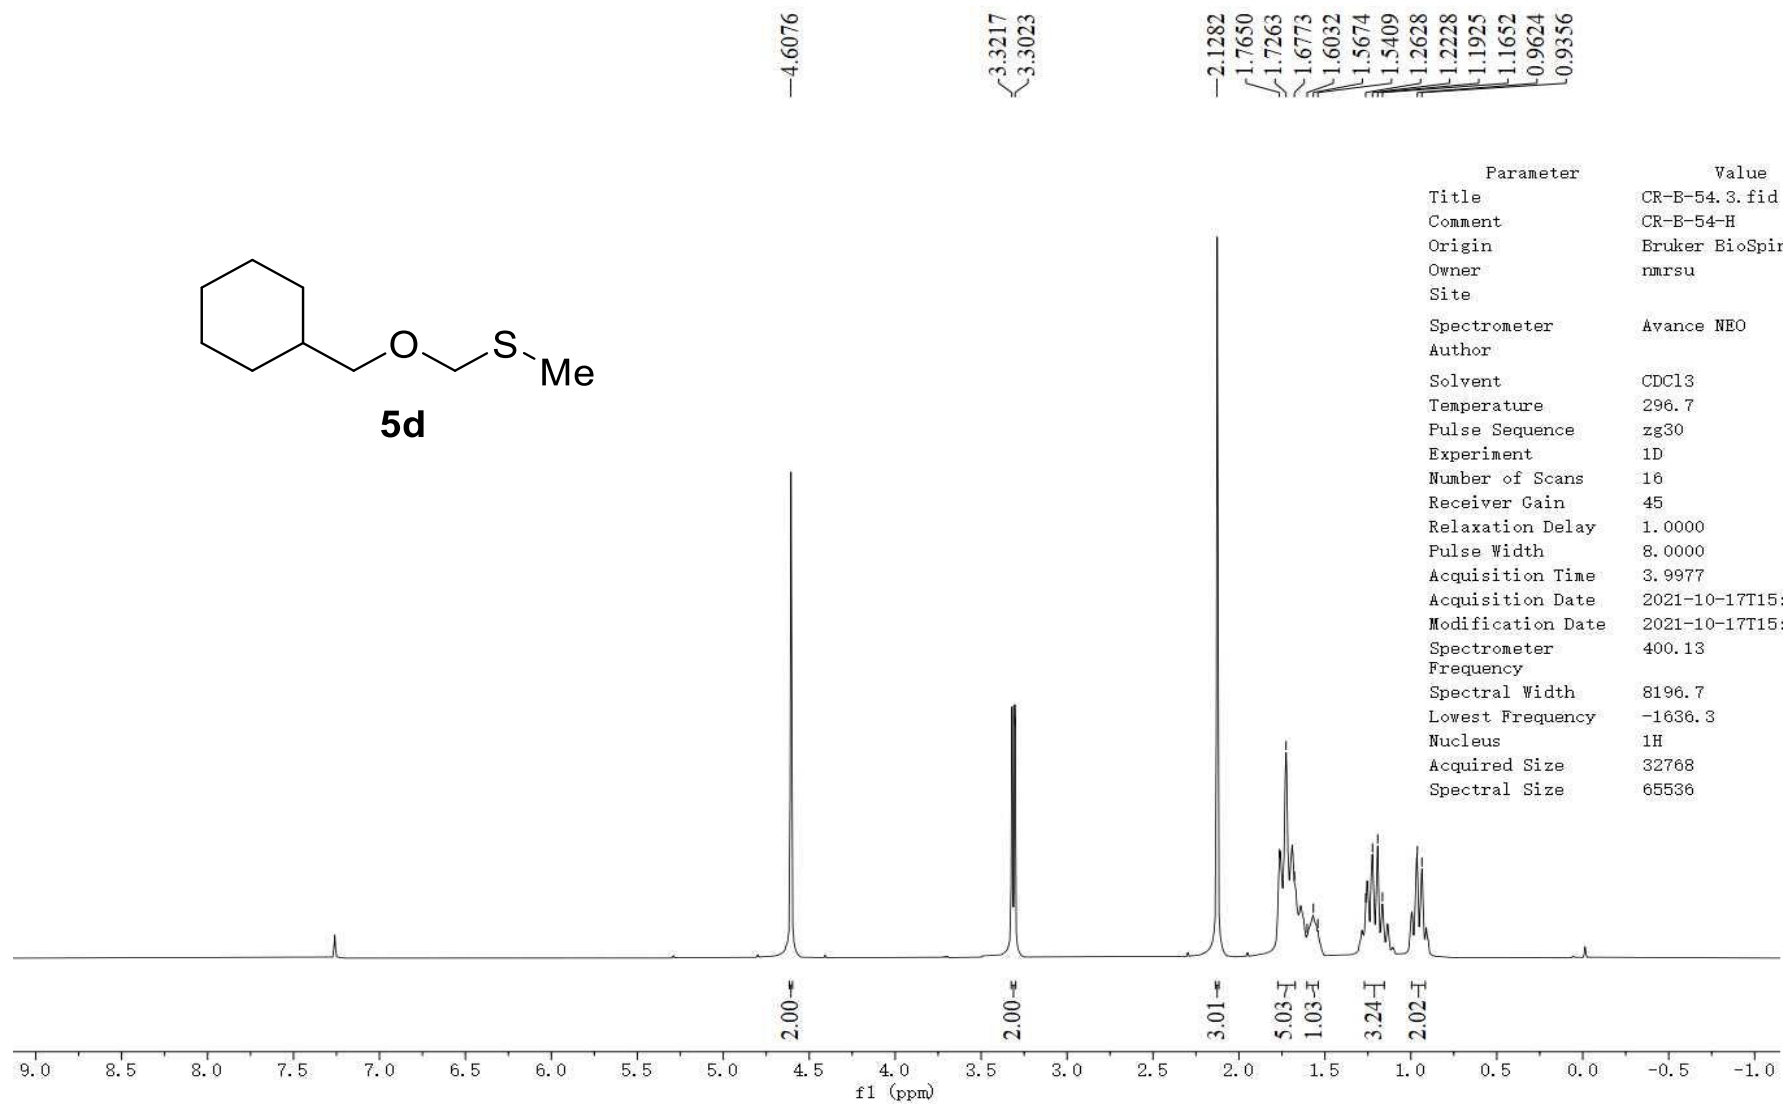

| Parameter         | Value               |
|-------------------|---------------------|
| Title             | CR-B-54.3.fid       |
| Comment           | CR-B-54-H           |
| Origin            | Bruker BioSpin GmbH |
| Owner             | mrsu                |
| Site              |                     |
| Spectrometer      | Avance NEO          |
| Author            |                     |
| Solvent           | CDCl3               |
| Temperature       | 296.7               |
| Pulse Sequence    | zg30                |
| Experiment        | 1D                  |
| Number of Scans   | 16                  |
| Receiver Gain     | 45                  |
| Relaxation Delay  | 1.0000              |
| Pulse Width       | 8.0000              |
| Acquisition Time  | 3.9977              |
| Acquisition Date  | 2021-10-17T15:12:30 |
| Modification Date | 2021-10-17T15:11:50 |
| Spectrometer      | 400.13              |
| Frequency         |                     |
| Spectral Width    | 8196.7              |
| Lowest Frequency  | -1636.3             |
| Nucleus           | 1H                  |
| Acquired Size     | 32768               |
| Spectral Size     | 65536               |

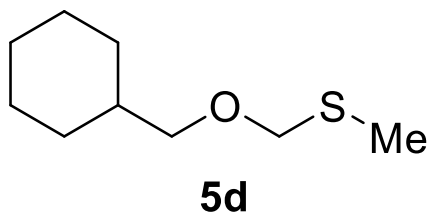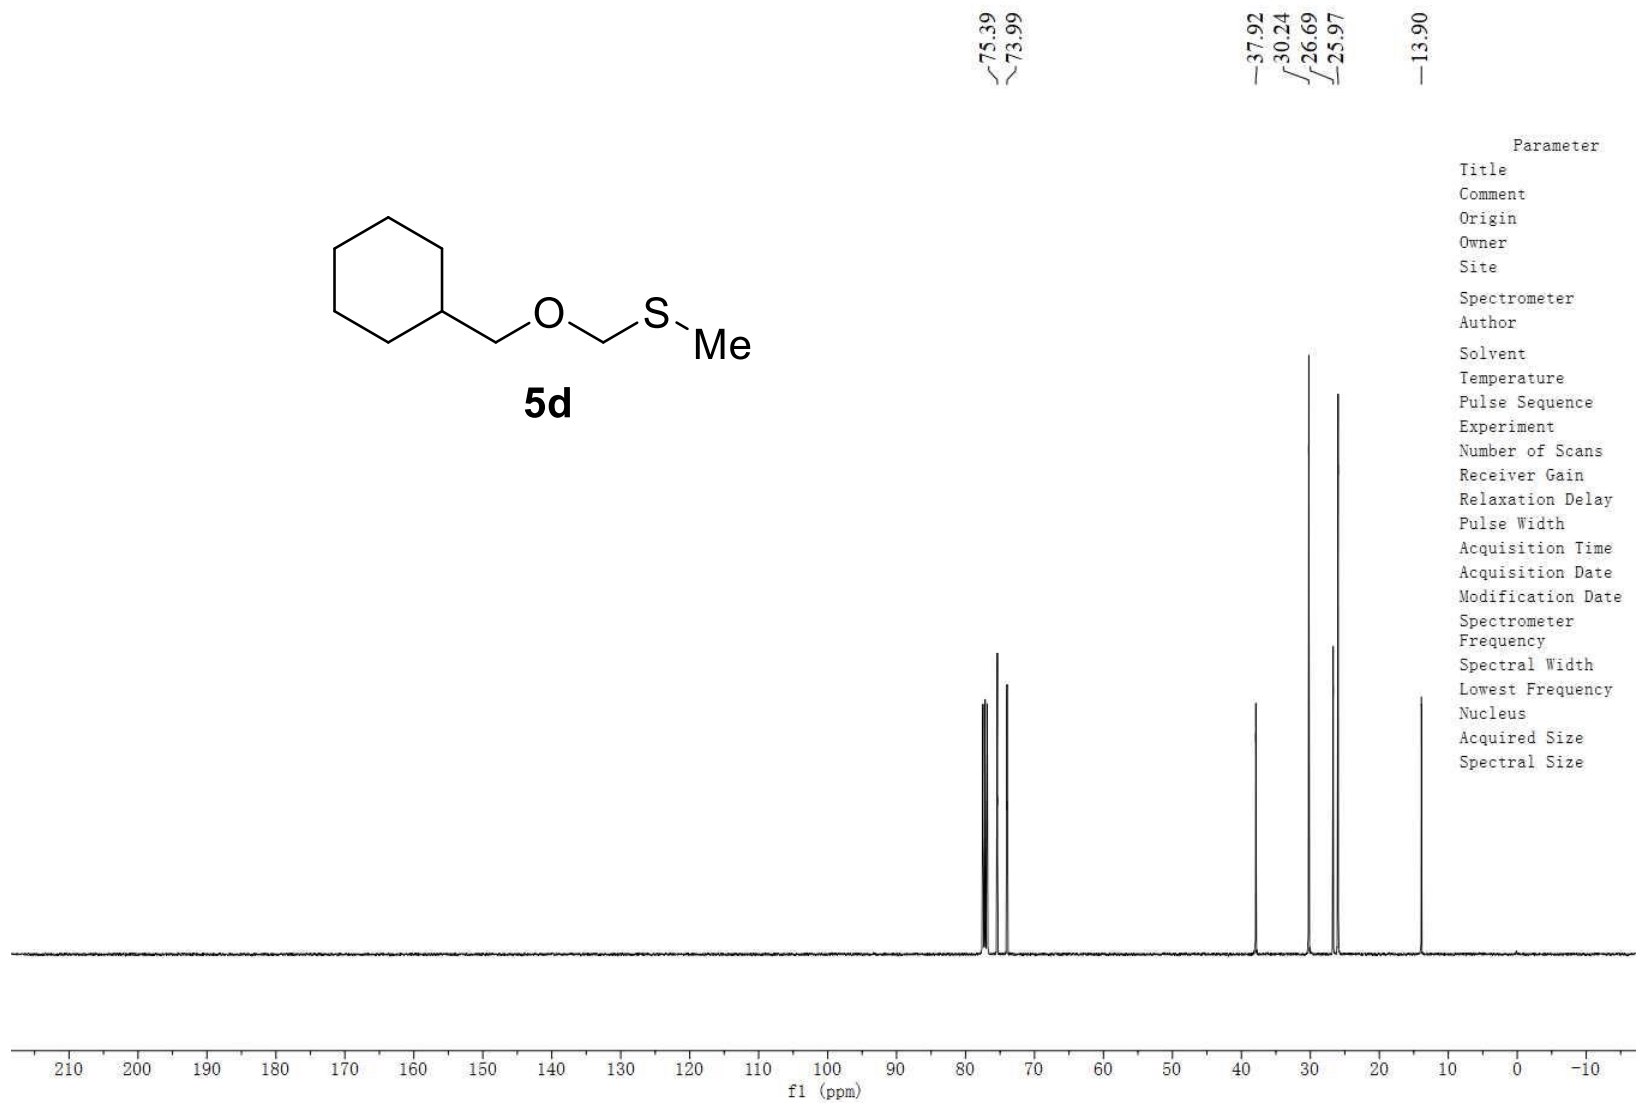

| Parameter         | Value               |
|-------------------|---------------------|
| Title             | CR-B-54. 4. fid     |
| Comment           | CR-B-54-C           |
| Origin            | Bruker BioSpin GmbH |
| Owner             | nmrsu               |
| Site              |                     |
| Spectrometer      | Avance NEO          |
| Author            |                     |
| Solvent           | CDCl3               |
| Temperature       | 297.5               |
| Pulse Sequence    | zgpg30              |
| Experiment        | 1D                  |
| Number of Scans   | 1024                |
| Receiver Gain     | 101                 |
| Relaxation Delay  | 2.0000              |
| Pulse Width       | 8.0000              |
| Acquisition Time  | 1.3763              |
| Acquisition Date  | 2021-10-17T16:11:46 |
| Modification Date | 2021-10-17T16:11:06 |
| Spectrometer      | 100.62              |
| Frequency         |                     |
| Spectral Width    | 23809.5             |
| Lowest Frequency  | -1831.7             |
| Nucleus           | 13C                 |
| Acquired Size     | 32768               |
| Spectral Size     | 65536               |

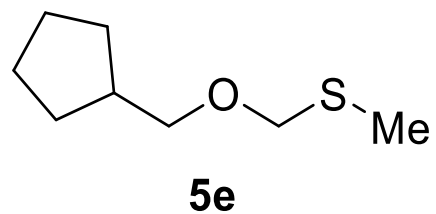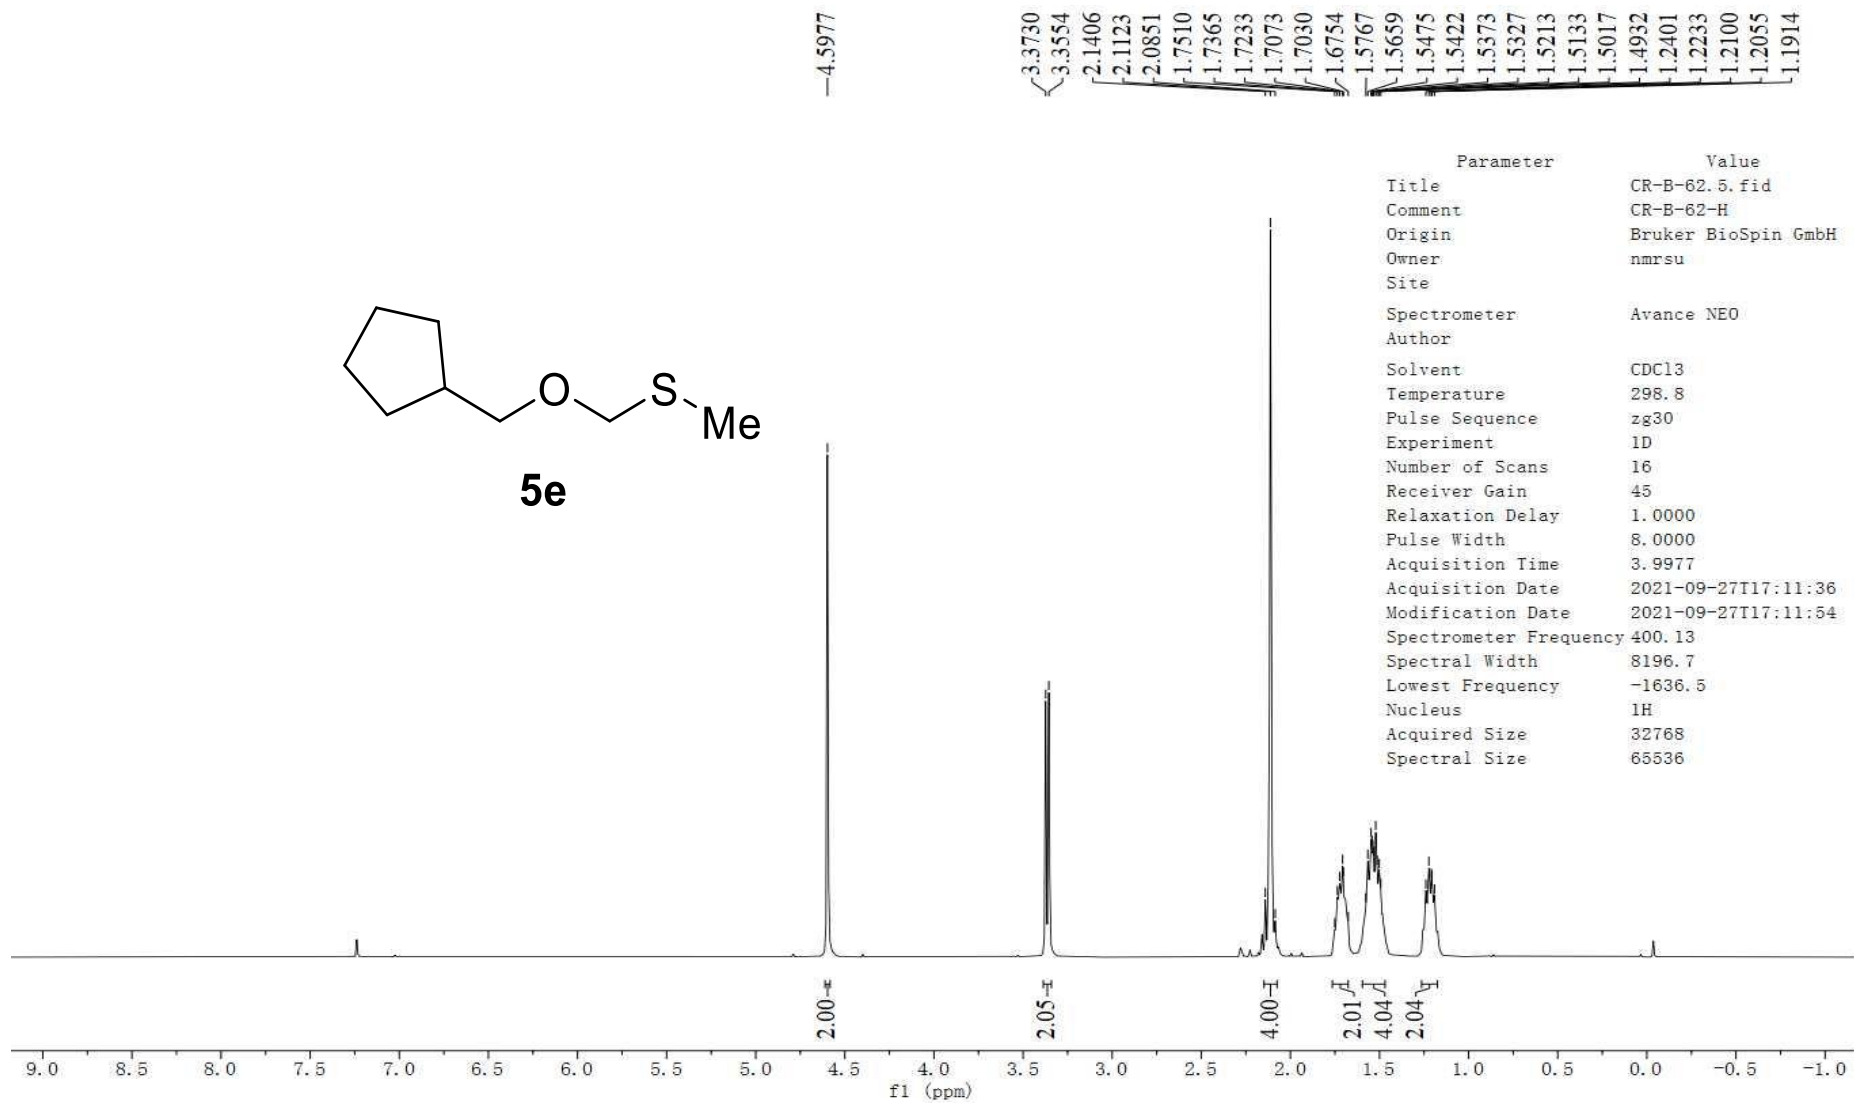

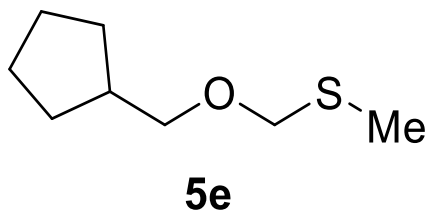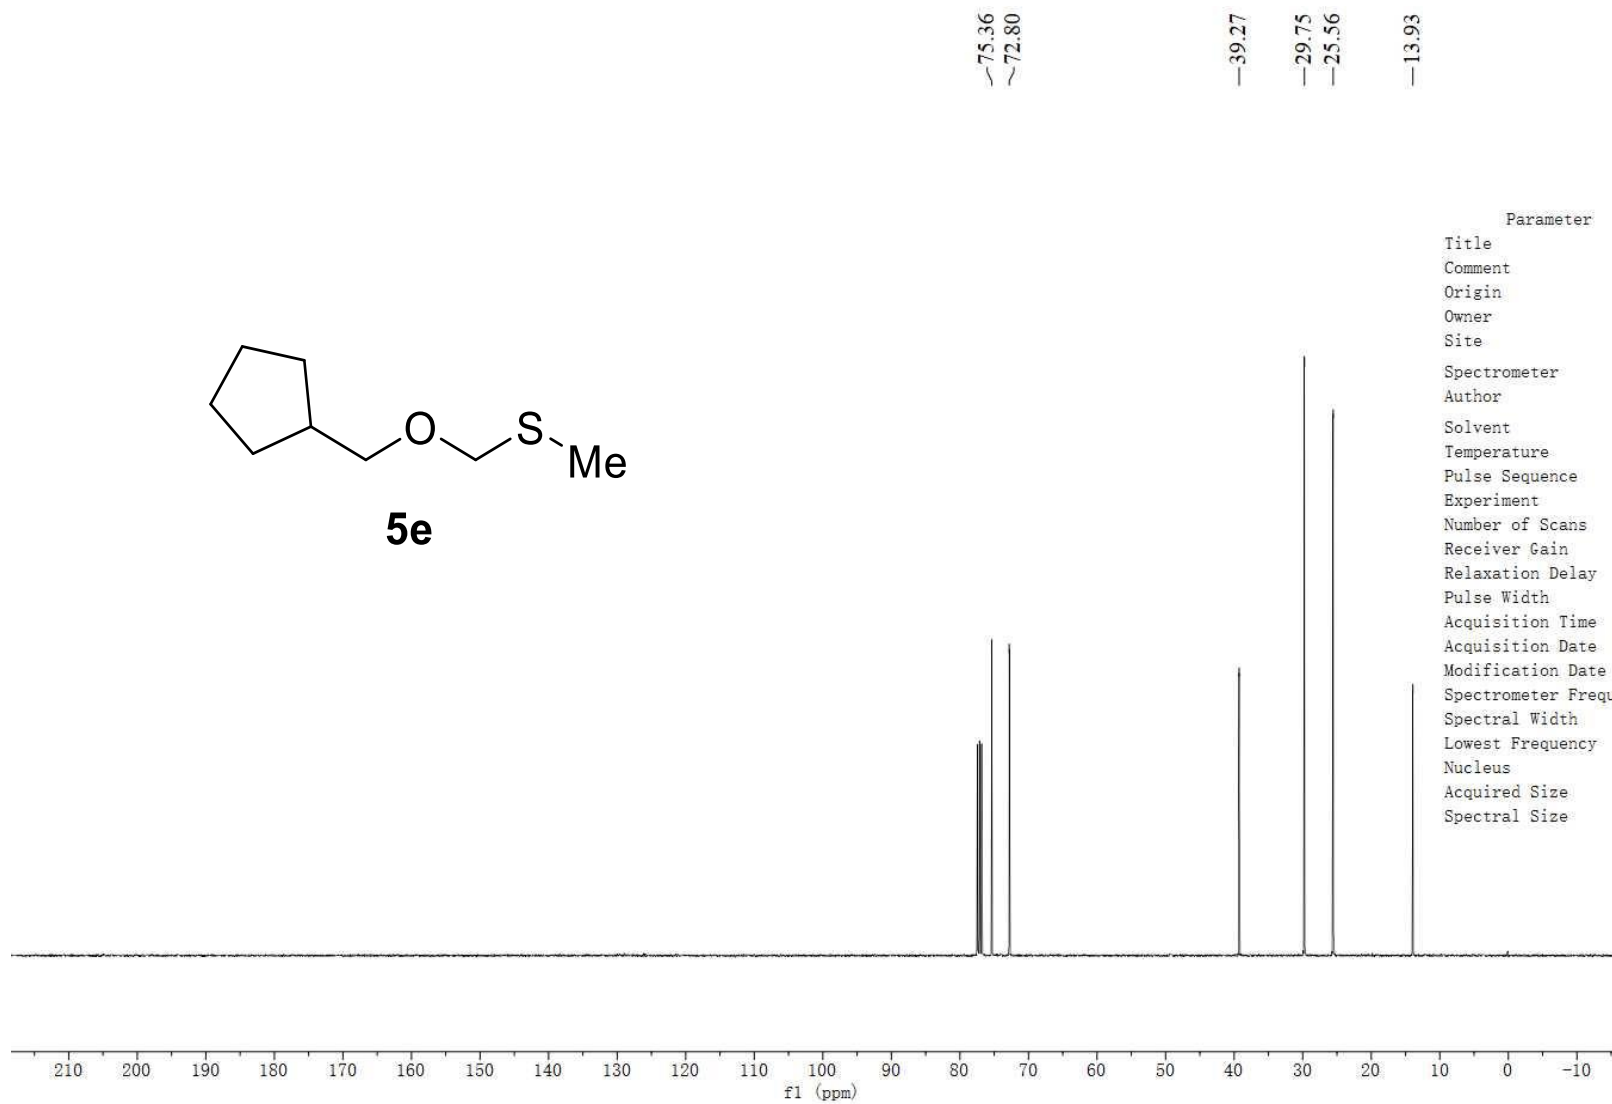

| Parameter              | Value               |
|------------------------|---------------------|
| Title                  | CR-B-62.6.fid       |
| Comment                | CR-B-62-C           |
| Origin                 | Bruker BioSpin GmbH |
| Owner                  | nmsru               |
| Site                   |                     |
| Spectrometer           | Avance NEO          |
| Author                 |                     |
| Solvent                | CDCl3               |
| Temperature            | 299.5               |
| Pulse Sequence         | zgpg30              |
| Experiment             | 1D                  |
| Number of Scans        | 1024                |
| Receiver Gain          | 101                 |
| Relaxation Delay       | 2.0000              |
| Pulse Width            | 8.0000              |
| Acquisition Time       | 1.3763              |
| Acquisition Date       | 2021-09-27T18:11:06 |
| Modification Date      | 2021-09-27T18:11:24 |
| Spectrometer Frequency | 100.62              |
| Spectral Width         | 23809.5             |
| Lowest Frequency       | -1831.4             |
| Nucleus                | 13C                 |
| Acquired Size          | 32768               |
| Spectral Size          | 65536               |

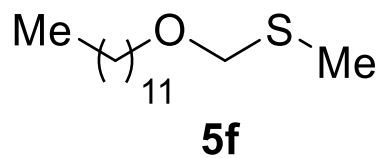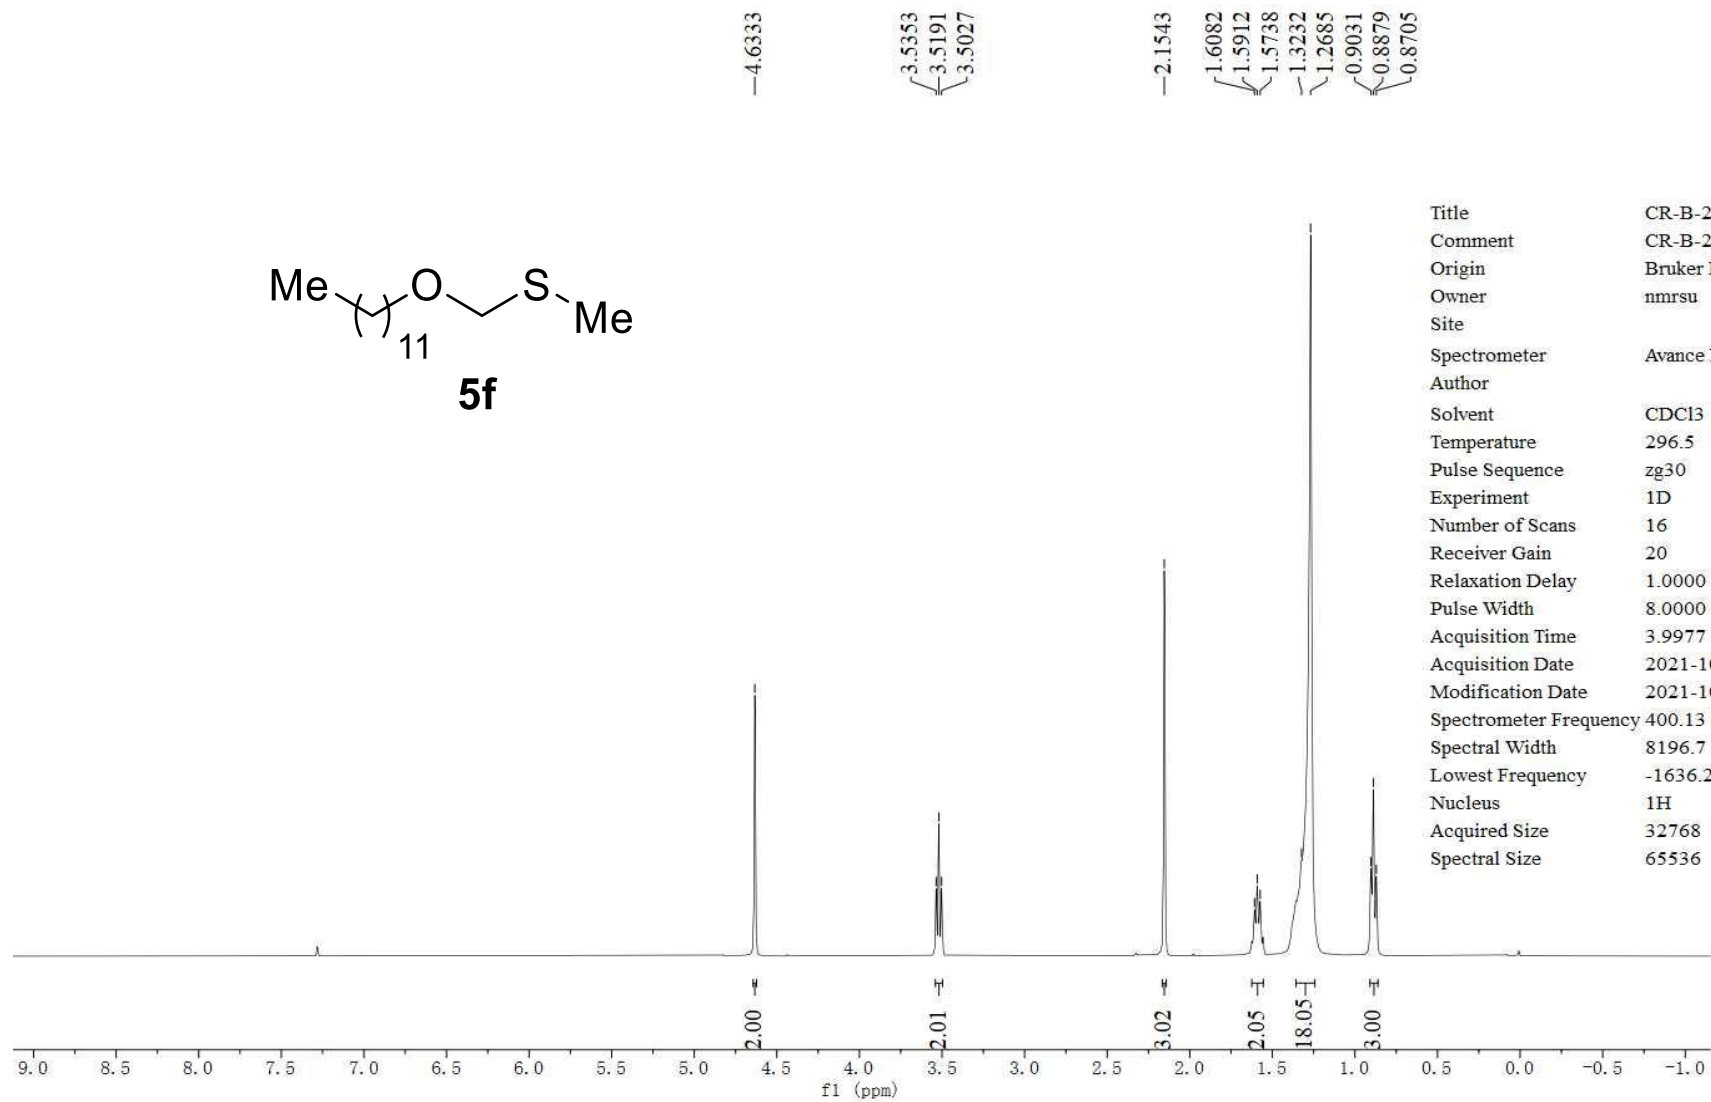

|                        |                     |
|------------------------|---------------------|
| Title                  | CR-B-24.1.fid       |
| Comment                | CR-B-24-H           |
| Origin                 | Bruker BioSpin GmbH |
| Owner                  | nmrsu               |
| Site                   |                     |
| Spectrometer           | Avance NEO          |
| Author                 |                     |
| Solvent                | CDCl3               |
| Temperature            | 296.5               |
| Pulse Sequence         | zg30                |
| Experiment             | 1D                  |
| Number of Scans        | 16                  |
| Receiver Gain          | 20                  |
| Relaxation Delay       | 1.0000              |
| Pulse Width            | 8.0000              |
| Acquisition Time       | 3.9977              |
| Acquisition Date       | 2021-10-17T14:07:58 |
| Modification Date      | 2021-10-17T14:07:18 |
| Spectrometer Frequency | 400.13              |
| Spectral Width         | 8196.7              |
| Lowest Frequency       | -1636.2             |
| Nucleus                | 1H                  |
| Acquired Size          | 32768               |
| Spectral Size          | 65536               |

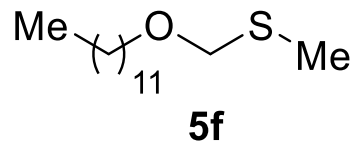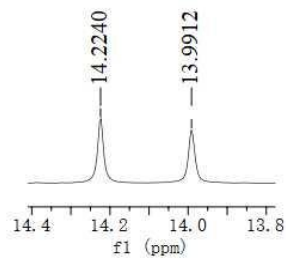

— 75.25  
 — 68.32  
 32.04  
 29.78  
 29.75  
 29.72  
 29.56  
 29.52  
 29.47  
 26.37  
 22.81  
 14.22  
 13.99

|                        |                     |
|------------------------|---------------------|
| Title                  | CR-B-24.2.fid       |
| Comment                | CR-B-24-C           |
| Origin                 | Bruker BioSpin GmbH |
| Owner                  | nmrsu               |
| Site                   |                     |
| Spectrometer           | Avance NEO          |
| Author                 |                     |
| Solvent                | CDCl3               |
| Temperature            | 297.4               |
| Pulse Sequence         | zgpg30              |
| Experiment             | 1D                  |
| Number of Scans        | 1024                |
| Receiver Gain          | 101                 |
| Relaxation Delay       | 2.0000              |
| Pulse Width            | 8.0000              |
| Acquisition Time       | 1.3763              |
| Acquisition Date       | 2021-10-17T15:07:17 |
| Modification Date      | 2021-10-17T15:06:36 |
| Spectrometer Frequency | 100.62              |
| Spectral Width         | 23809.5             |
| Lowest Frequency       | -1831.7             |
| Nucleus                | 13C                 |
| Acquired Size          | 32768               |
| Spectral Size          | 65536               |

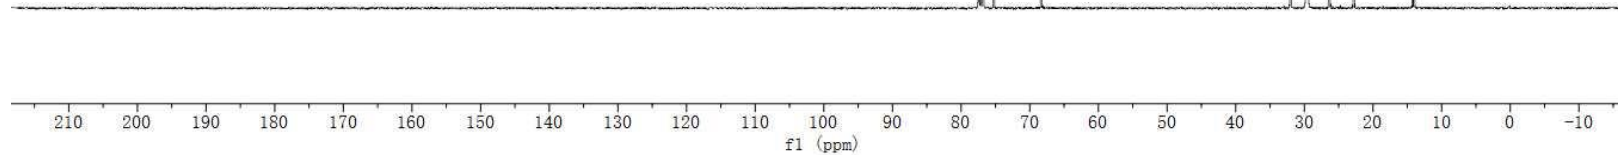

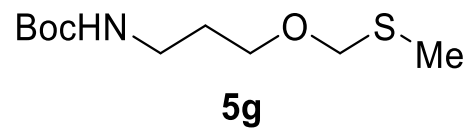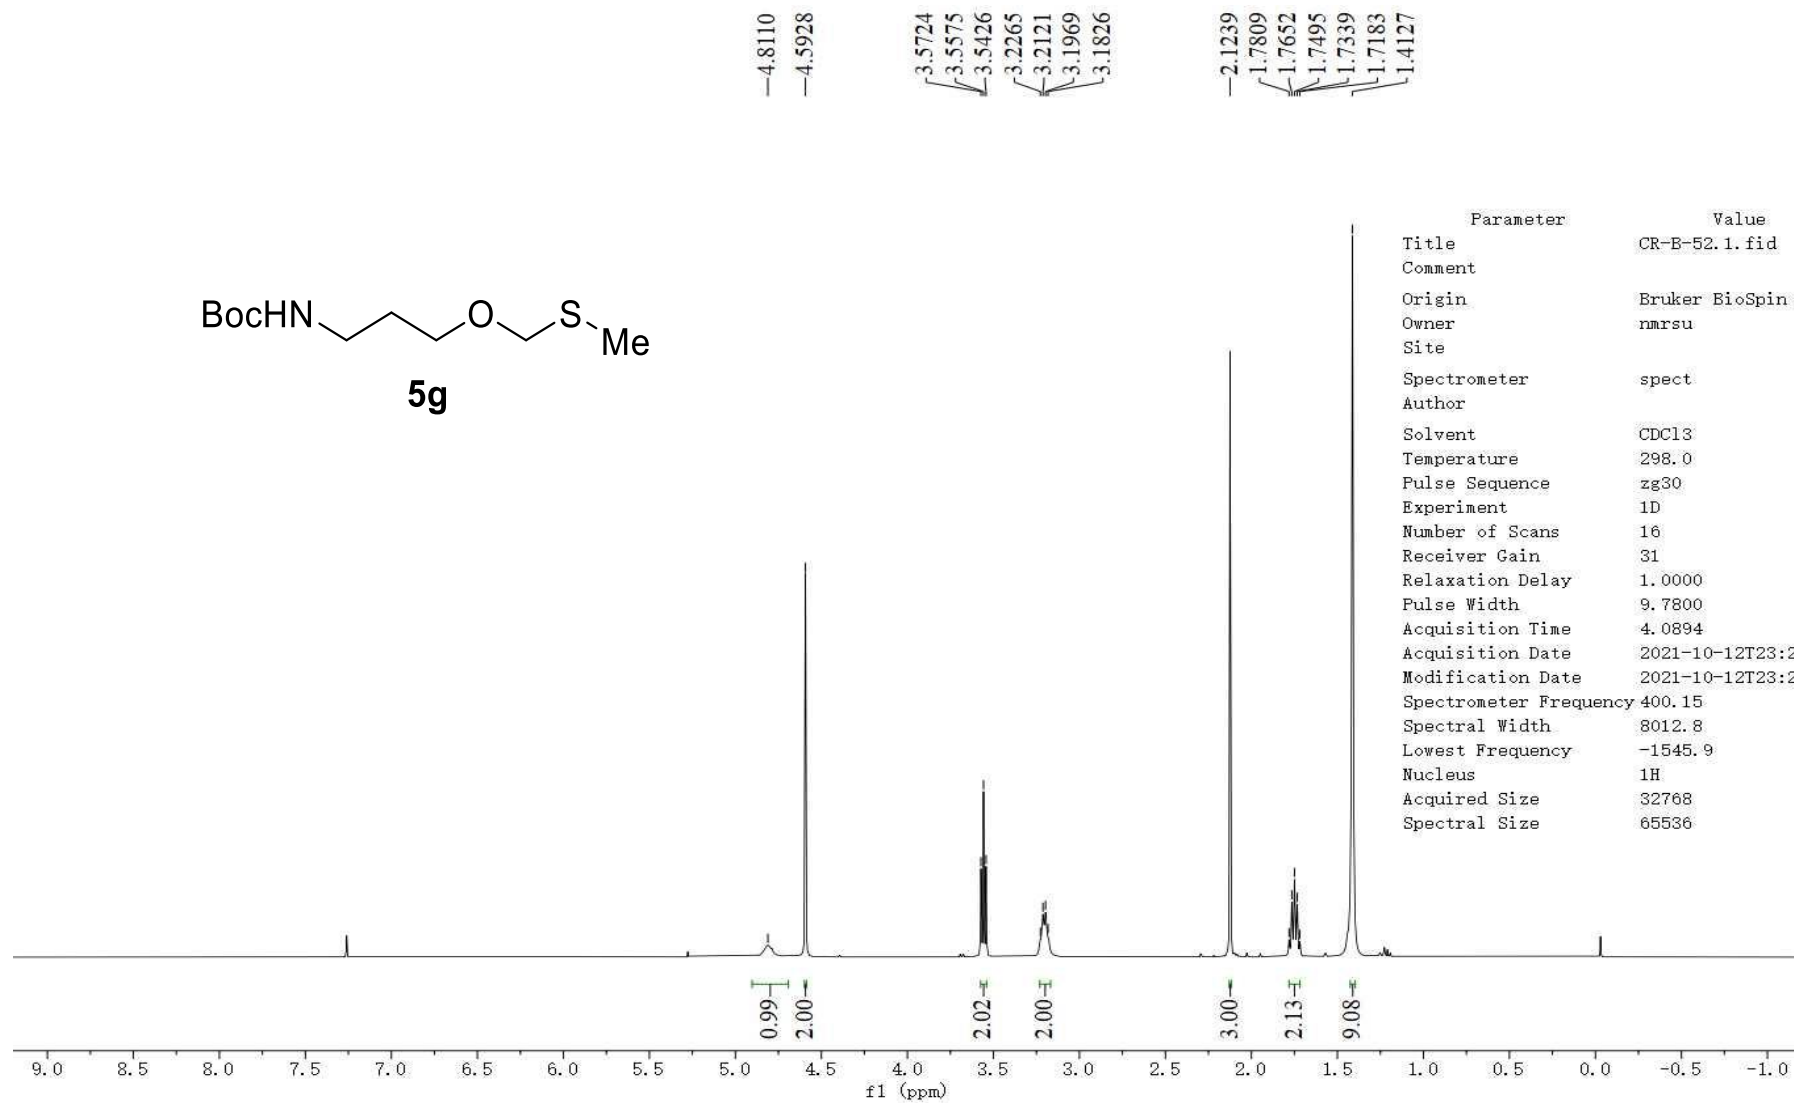

| Parameter              | Value               |
|------------------------|---------------------|
| Title                  | CR-B-52.1.fid       |
| Comment                |                     |
| Origin                 | Eruker BioSpin GmbH |
| Owner                  | nmsu                |
| Site                   |                     |
| Spectrometer           | spect               |
| Author                 |                     |
| Solvent                | CDCl3               |
| Temperature            | 298.0               |
| Pulse Sequence         | zg30                |
| Experiment             | 1D                  |
| Number of Scans        | 16                  |
| Receiver Gain          | 31                  |
| Relaxation Delay       | 1.0000              |
| Pulse Width            | 9.7800              |
| Acquisition Time       | 4.0894              |
| Acquisition Date       | 2021-10-12T23:23:38 |
| Modification Date      | 2021-10-12T23:23:40 |
| Spectrometer Frequency | 400.15              |
| Spectral Width         | 8012.8              |
| Lowest Frequency       | -1545.9             |
| Nucleus                | 1H                  |
| Acquired Size          | 32768               |
| Spectral Size          | 65536               |



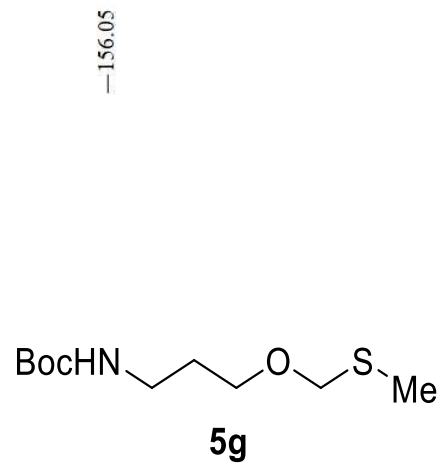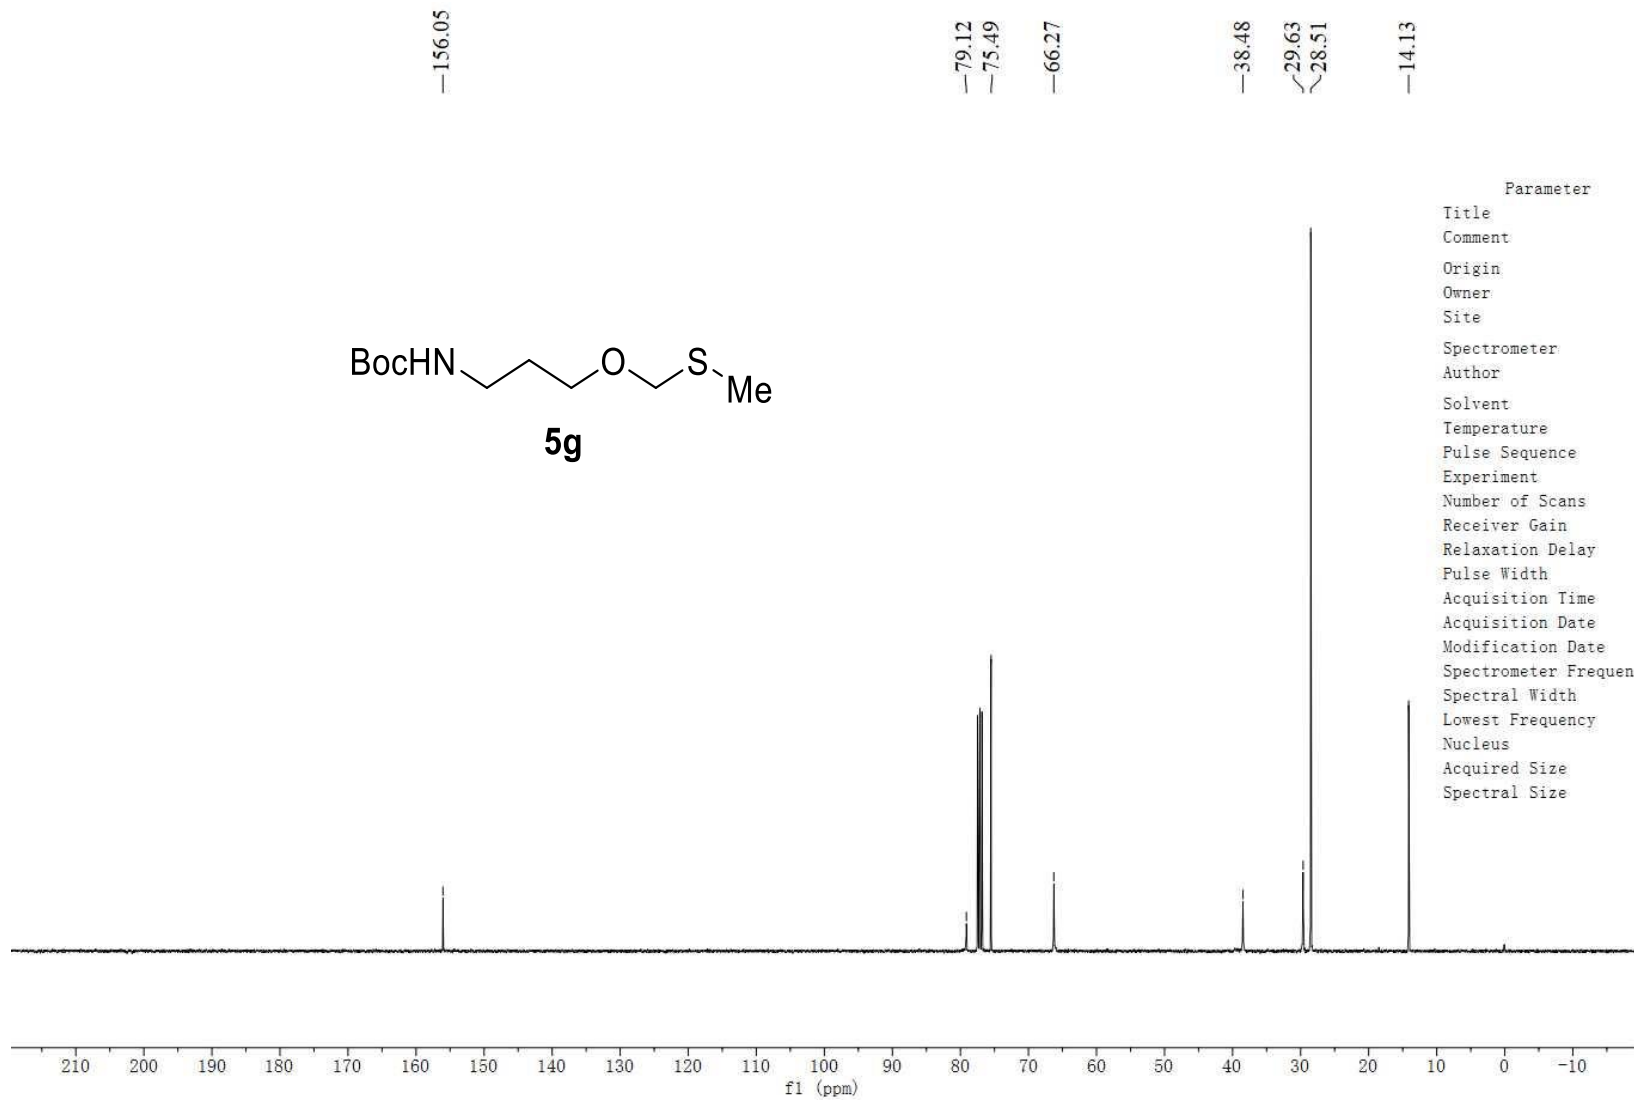

| Parameter              | Value               |
|------------------------|---------------------|
| Title                  | CR-B-52.2.fid       |
| Comment                |                     |
| Origin                 | Bruker BioSpin GmbH |
| Owner                  | nmrsu               |
| Site                   |                     |
| Spectrometer           | spect               |
| Author                 |                     |
| Solvent                | CDCl <sub>3</sub>   |
| Temperature            | 298.0               |
| Pulse Sequence         | zgpg30              |
| Experiment             | 1D                  |
| Number of Scans        | 600                 |
| Receiver Gain          | 202                 |
| Relaxation Delay       | 2.0000              |
| Pulse Width            | 10.5800             |
| Acquisition Time       | 1.3631              |
| Acquisition Date       | 2021-10-12T23:58:59 |
| Modification Date      | 2021-10-12T23:59:00 |
| Spectrometer Frequency | 100.63              |
| Spectral Width         | 24038.5             |
| Lowest Frequency       | -1947.8             |
| Nucleus                | <sup>13</sup> C     |
| Acquired Size          | 32768               |
| Spectral Size          | 65536               |

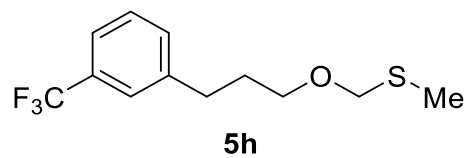

7.4580  
7.4446  
7.3954  
7.3837

4.6417

3.5570  
3.5417  
3.5263

2.7958  
2.7766  
2.7570  
2.1682  
1.9663  
1.9498  
1.9315  
1.9138  
1.8969

| Parameter              | Value               |
|------------------------|---------------------|
| Title                  | CR-B-60.9.fid       |
| Comment                | CR-B-60-H           |
| Origin                 | Bruker BioSpin GmbH |
| Owner                  | nmrsu               |
| Site                   |                     |
| Spectrometer           | Avance NEO          |
| Author                 |                     |
| Solvent                | CDCl3               |
| Temperature            | 298.8               |
| Pulse Sequence         | zg30                |
| Experiment             | 1D                  |
| Number of Scans        | 16                  |
| Receiver Gain          | 69                  |
| Relaxation Delay       | 1.0000              |
| Pulse Width            | 8.0000              |
| Acquisition Time       | 3.9977              |
| Acquisition Date       | 2021-09-27T19:21:56 |
| Modification Date      | 2021-09-27T19:22:14 |
| Spectrometer Frequency | 400.13              |
| Spectral Width         | 8196.7              |
| Lowest Frequency       | -1636.3             |
| Nucleus                | 1H                  |
| Acquired Size          | 32768               |
| Spectral Size          | 65536               |

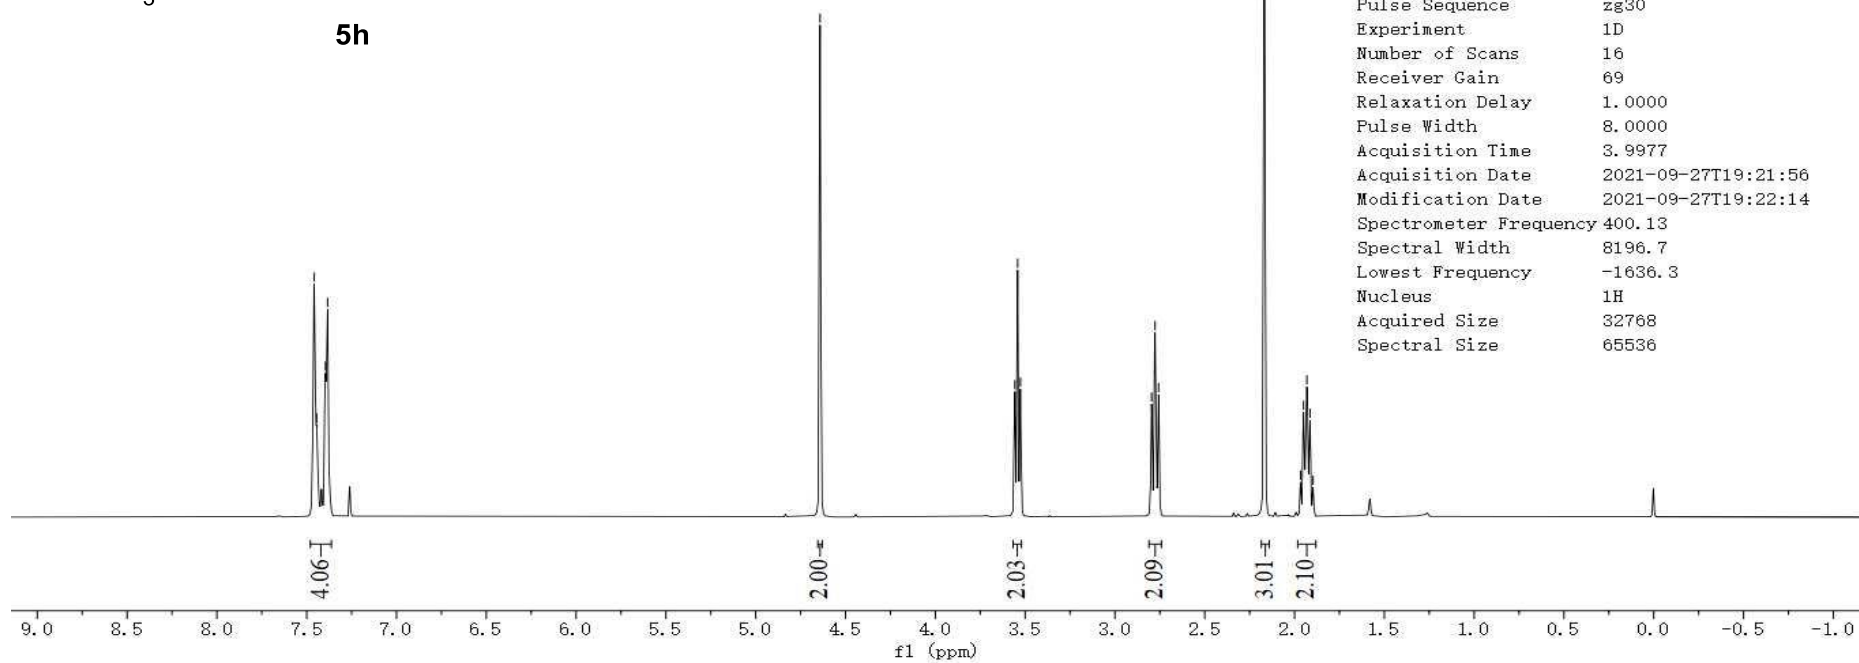

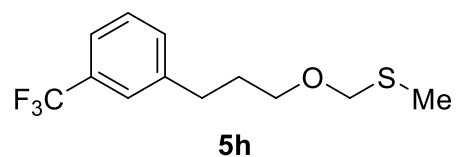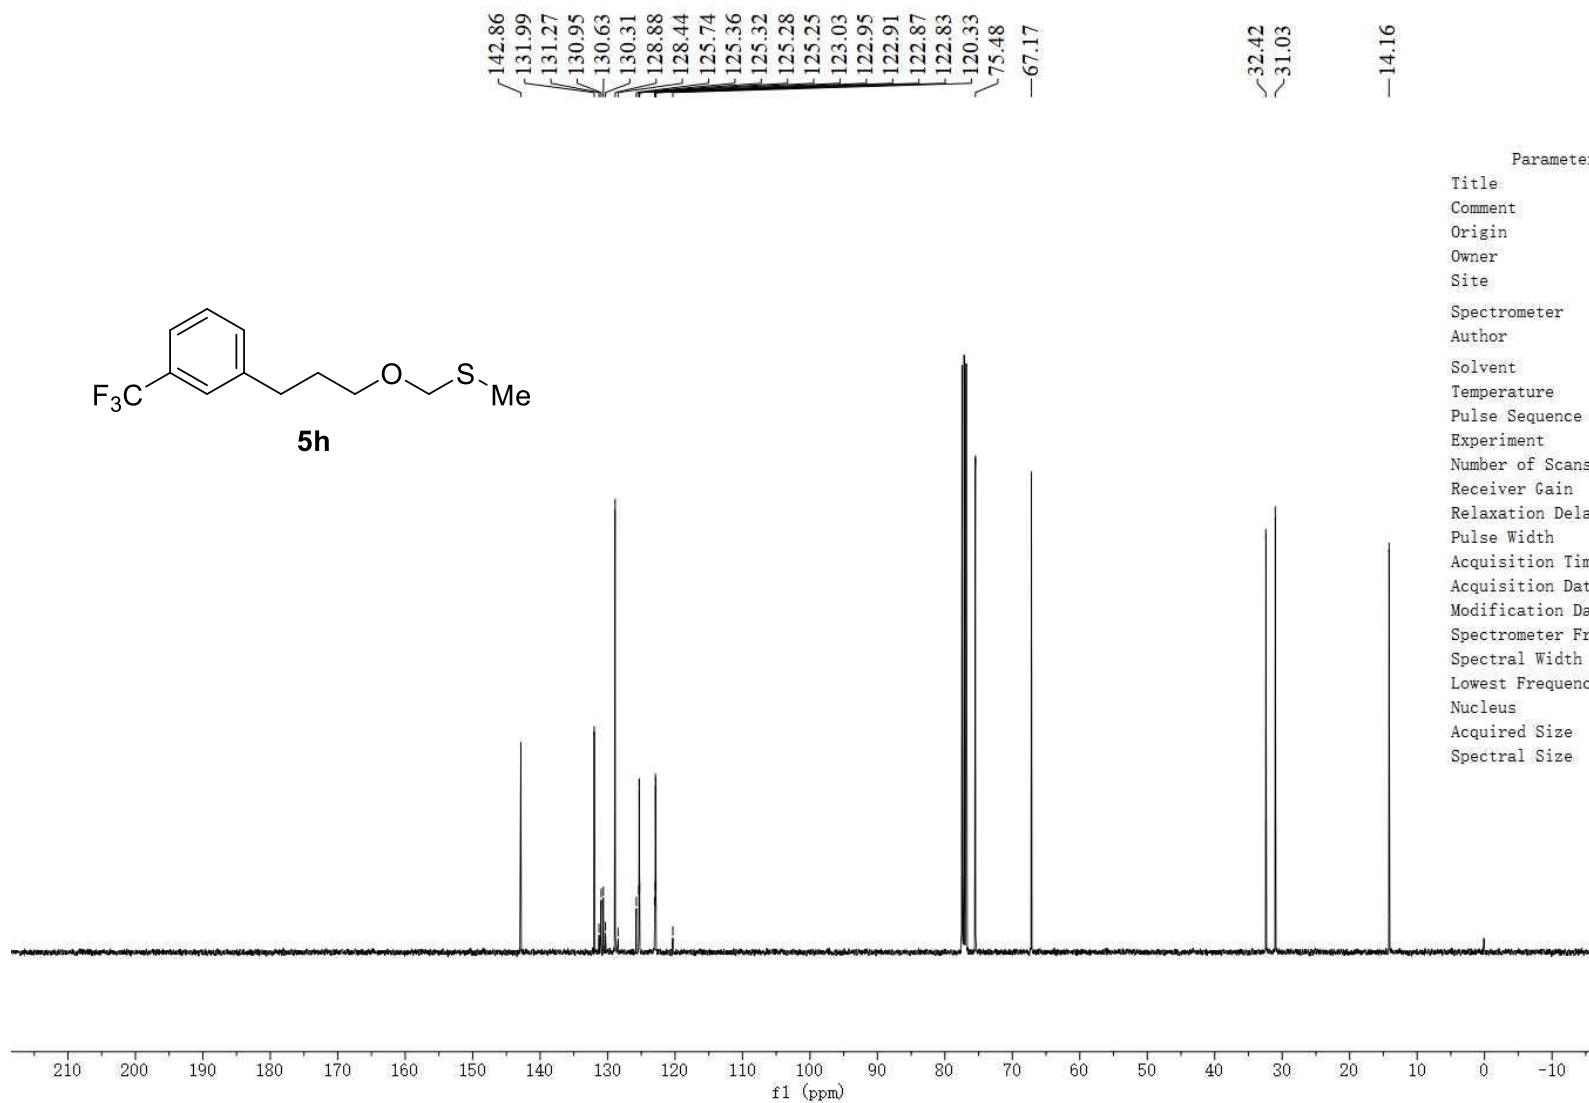

| Parameter              | Value               |
|------------------------|---------------------|
| Title                  | CR-B-60.10.fid      |
| Comment                | CR-B-60-C           |
| Origin                 | Bruker BioSpin GmbH |
| Owner                  | nmrsu               |
| Site                   |                     |
| Spectrometer           | Avance NEO          |
| Author                 |                     |
| Solvent                | CDCl3               |
| Temperature            | 299.5               |
| Pulse Sequence         | zgpg30              |
| Experiment             | 1D                  |
| Number of Scans        | 1024                |
| Receiver Gain          | 101                 |
| Relaxation Delay       | 2.0000              |
| Pulse Width            | 8.0000              |
| Acquisition Time       | 1.3763              |
| Acquisition Date       | 2021-09-27T20:21:19 |
| Modification Date      | 2021-09-27T20:21:38 |
| Spectrometer Frequency | 100.62              |
| Spectral Width         | 23809.5             |
| Lowest Frequency       | -1829.9             |
| Nucleus                | 13C                 |
| Acquired Size          | 32768               |
| Spectral Size          | 65536               |

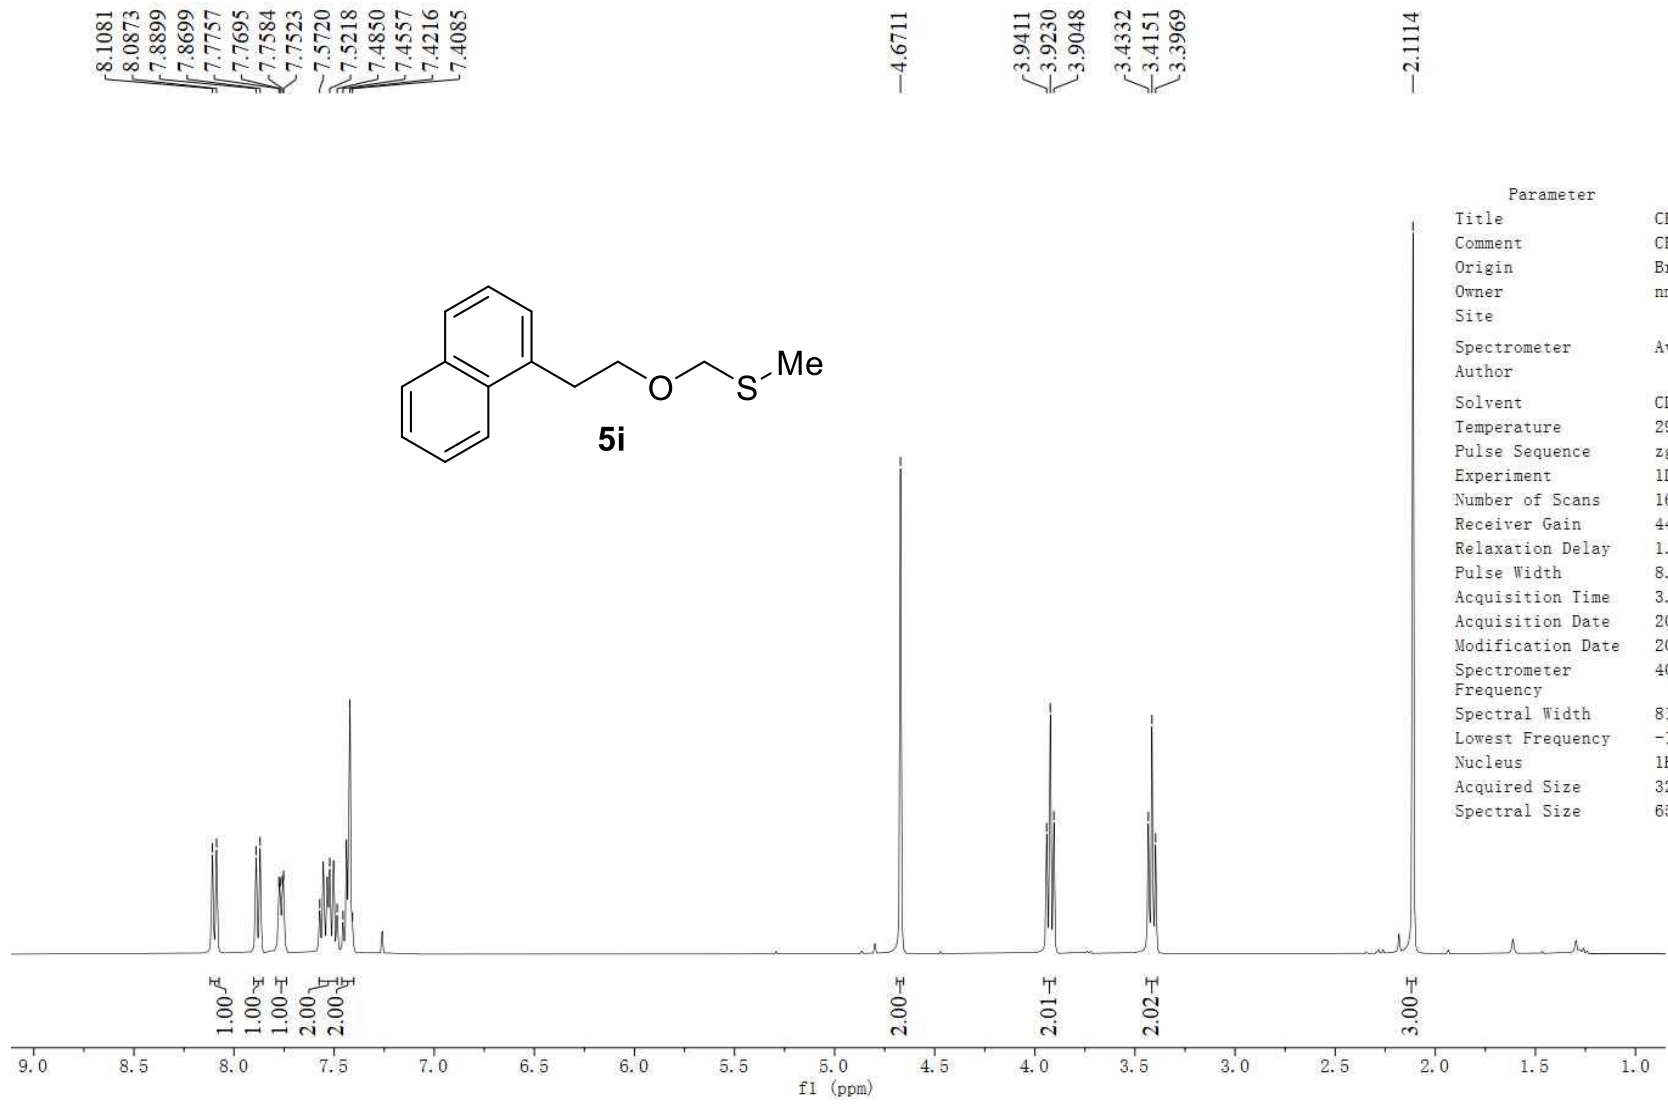

| Parameter         | Value               |
|-------------------|---------------------|
| Title             | CR-B-86.9.fid       |
| Comment           | CR-B-86-H           |
| Origin            | Bruker BioSpin GmbH |
| Owner             | nmrsu               |
| Site              |                     |
| Spectrometer      | Avance NEO          |
| Author            |                     |
| Solvent           | CDCl <sub>3</sub>   |
| Temperature       | 296.6               |
| Pulse Sequence    | zg30                |
| Experiment        | 1D                  |
| Number of Scans   | 16                  |
| Receiver Gain     | 44                  |
| Relaxation Delay  | 1.0000              |
| Pulse Width       | 8.0000              |
| Acquisition Time  | 3.9977              |
| Acquisition Date  | 2021-10-18T08:39:47 |
| Modification Date | 2021-10-18T08:39:08 |
| Spectrometer      | 400.13              |
| Frequency         |                     |
| Spectral Width    | 8196.7              |
| Lowest Frequency  | -1636.1             |
| Nucleus           | <sup>1</sup> H      |
| Acquired Size     | 32768               |
| Spectral Size     | 65536               |

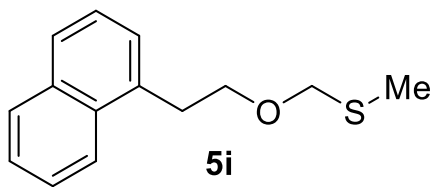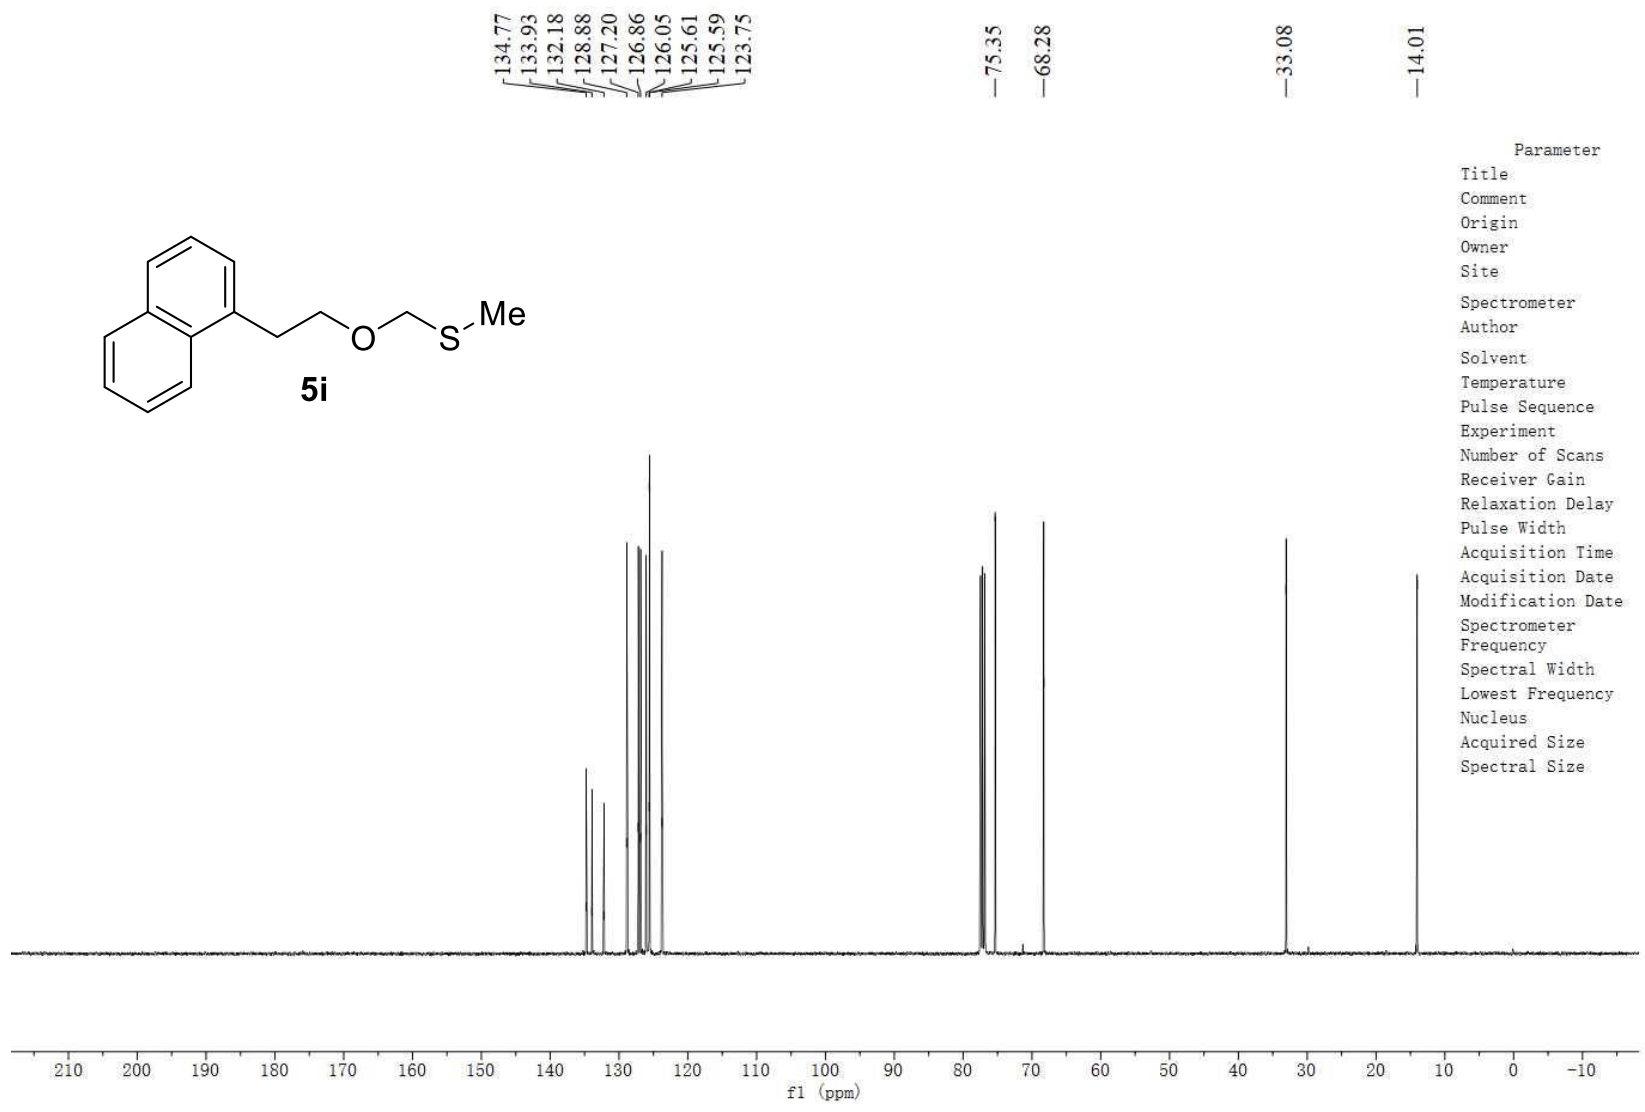

| Parameter         | Value               |
|-------------------|---------------------|
| Title             | CR-B-86.10.fid      |
| Comment           | CR-B-86-C           |
| Origin            | Bruker BioSpin GmbH |
| Owner             | nmsu                |
| Site              |                     |
| Spectrometer      | Avance NEO          |
| Author            |                     |
| Solvent           | CDC13               |
| Temperature       | 297.3               |
| Pulse Sequence    | zgpg30              |
| Experiment        | 1D                  |
| Number of Scans   | 1024                |
| Receiver Gain     | 101                 |
| Relaxation Delay  | 2.0000              |
| Pulse Width       | 8.0000              |
| Acquisition Time  | 1.3763              |
| Acquisition Date  | 2021-10-18T09:39:14 |
| Modification Date | 2021-10-18T09:38:36 |
| Spectrometer      | 100.62              |
| Frequency         |                     |
| Spectral Width    | 23809.5             |
| Lowest Frequency  | -1838.6             |
| Nucleus           | 13C                 |
| Acquired Size     | 32768               |
| Spectral Size     | 65536               |

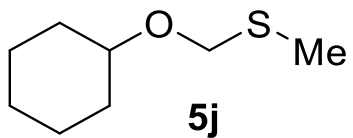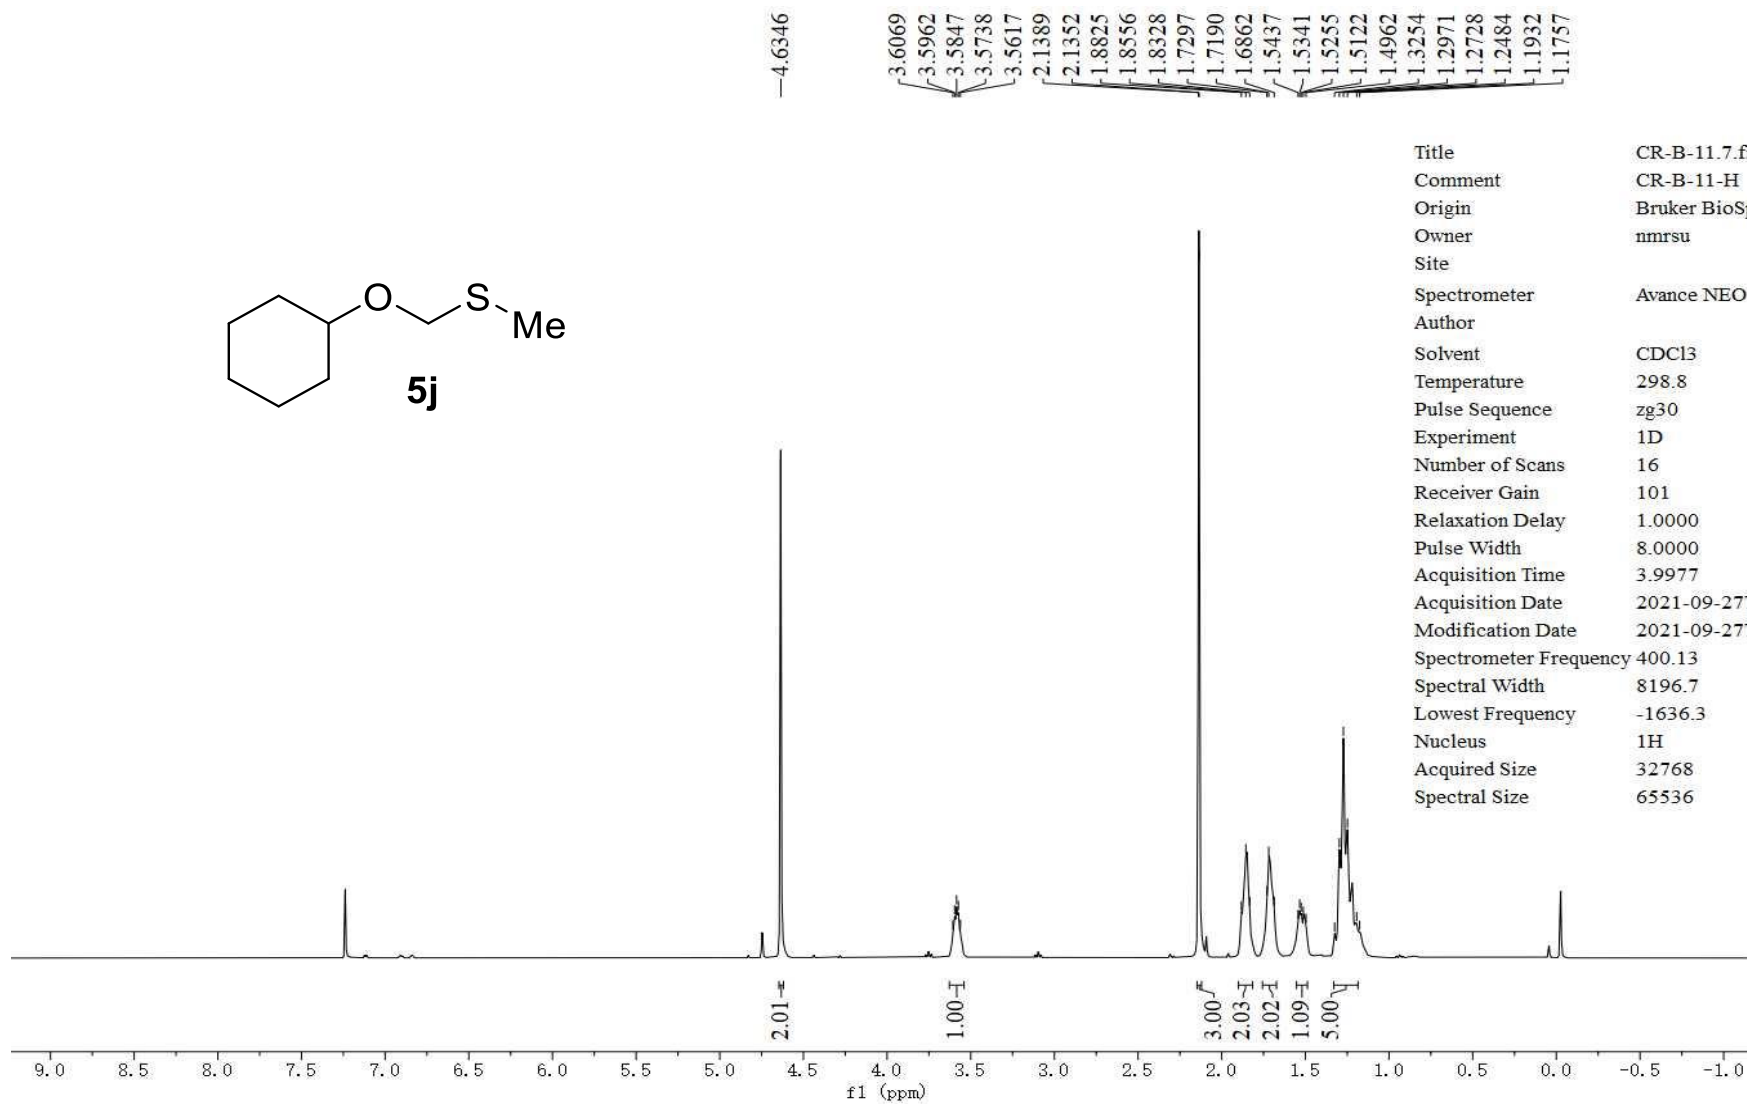

|                        |                     |
|------------------------|---------------------|
| Title                  | CR-B-11.7.fid       |
| Comment                | CR-B-11-H           |
| Origin                 | Bruker BioSpin GmbH |
| Owner                  | nmrsu               |
| Site                   |                     |
| Spectrometer           | Avance NEO          |
| Author                 |                     |
| Solvent                | CDCl3               |
| Temperature            | 298.8               |
| Pulse Sequence         | zg30                |
| Experiment             | 1D                  |
| Number of Scans        | 16                  |
| Receiver Gain          | 101                 |
| Relaxation Delay       | 1.0000              |
| Pulse Width            | 8.0000              |
| Acquisition Time       | 3.9977              |
| Acquisition Date       | 2021-09-27T18:17:23 |
| Modification Date      | 2021-09-27T18:17:42 |
| Spectrometer Frequency | 400.13              |
| Spectral Width         | 8196.7              |
| Lowest Frequency       | -1636.3             |
| Nucleus                | 1H                  |
| Acquired Size          | 32768               |
| Spectral Size          | 65536               |

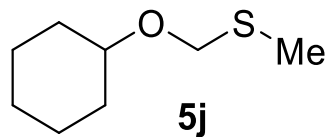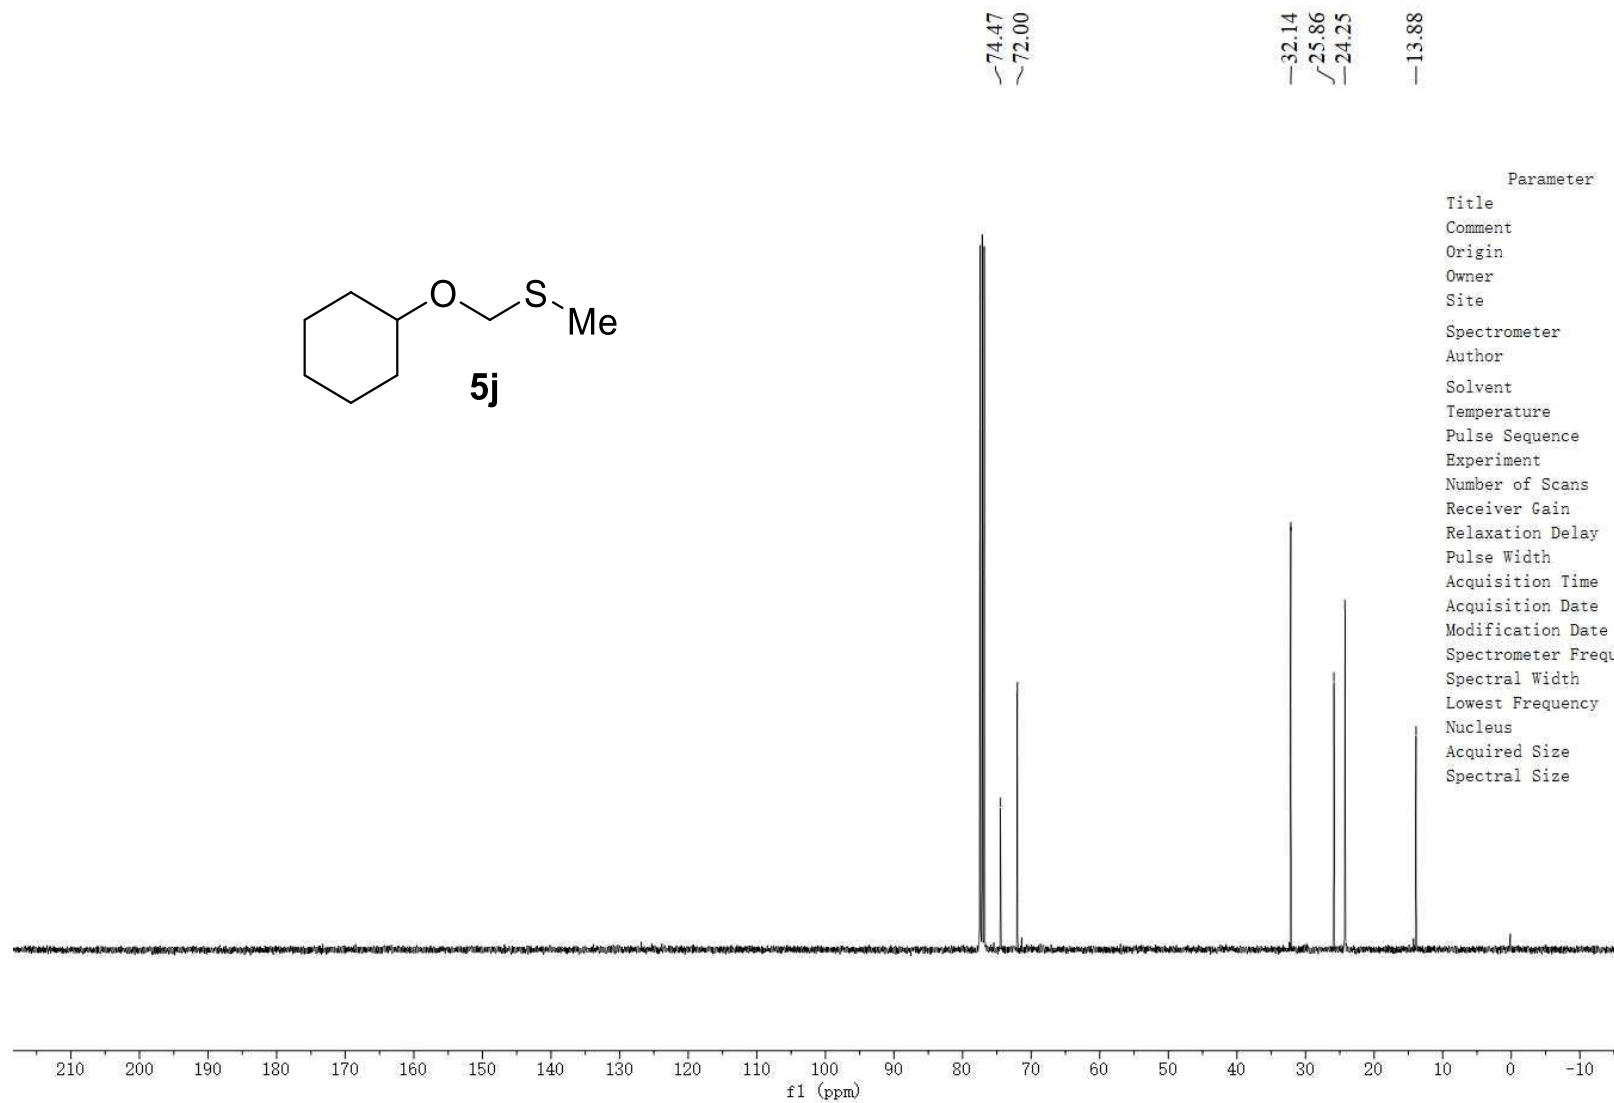

| Parameter              | Value               |
|------------------------|---------------------|
| Title                  | CR-B-11.8.fid       |
| Comment                | CR-B-11-C           |
| Origin                 | Bruker BioSpin GmbH |
| Owner                  | nmrsu               |
| Site                   |                     |
| Spectrometer           | Avance NEO          |
| Author                 |                     |
| Solvent                | CDCl3               |
| Temperature            | 299.5               |
| Pulse Sequence         | zgpg30              |
| Experiment             | 1D                  |
| Number of Scans        | 1024                |
| Receiver Gain          | 101                 |
| Relaxation Delay       | 2.0000              |
| Pulse Width            | 8.0000              |
| Acquisition Time       | 1.3763              |
| Acquisition Date       | 2021-09-27T19:16:41 |
| Modification Date      | 2021-09-27T19:17:00 |
| Spectrometer Frequency | 100.62              |
| Spectral Width         | 23809.5             |
| Lowest Frequency       | -1829.2             |
| Nucleus                | 13C                 |
| Acquired Size          | 32768               |
| Spectral Size          | 65536               |

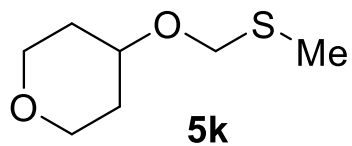

4.6337  
3.9208  
3.9098  
3.8985  
3.8920  
3.8804  
3.8694  
3.8523  
3.8405  
3.8294  
3.8184  
3.8068  
3.4545  
3.4476  
3.4299  
3.4240  
3.4182  
3.4014  
3.3945  
2.1233  
1.8644  
1.8549  
1.8436  
1.8317  
1.8243  
1.8206  
1.8133  
1.6008  
1.5910  
1.5779  
1.5677  
1.5561  
1.5445  
1.5344  
1.5215  
1.5112

| Parameter         | Value               |
|-------------------|---------------------|
| Title             | CR-B-58.5.fid       |
| Comment           | CR-B-58-H           |
| Origin            | Bruker BioSpin GmbH |
| Owner             | nmsru               |
| Site              |                     |
| Spectrometer      | Avance NEO          |
| Author            |                     |
| Solvent           | CDC13               |
| Temperature       | 296.9               |
| Pulse Sequence    | zg30                |
| Experiment        | 1D                  |
| Number of Scans   | 16                  |
| Receiver Gain     | 32                  |
| Relaxation Delay  | 1.0000              |
| Pulse Width       | 8.0000              |
| Acquisition Time  | 3.9977              |
| Acquisition Date  | 2021-10-17T16:18:24 |
| Modification Date | 2021-10-17T16:15:44 |
| Spectrometer      | 400.13              |
| Frequency         |                     |
| Spectral Width    | 8196.7              |
| Lowest Frequency  | -1636.2             |
| Nucleus           | 1H                  |
| Acquired Size     | 32768               |
| Spectral Size     | 65536               |

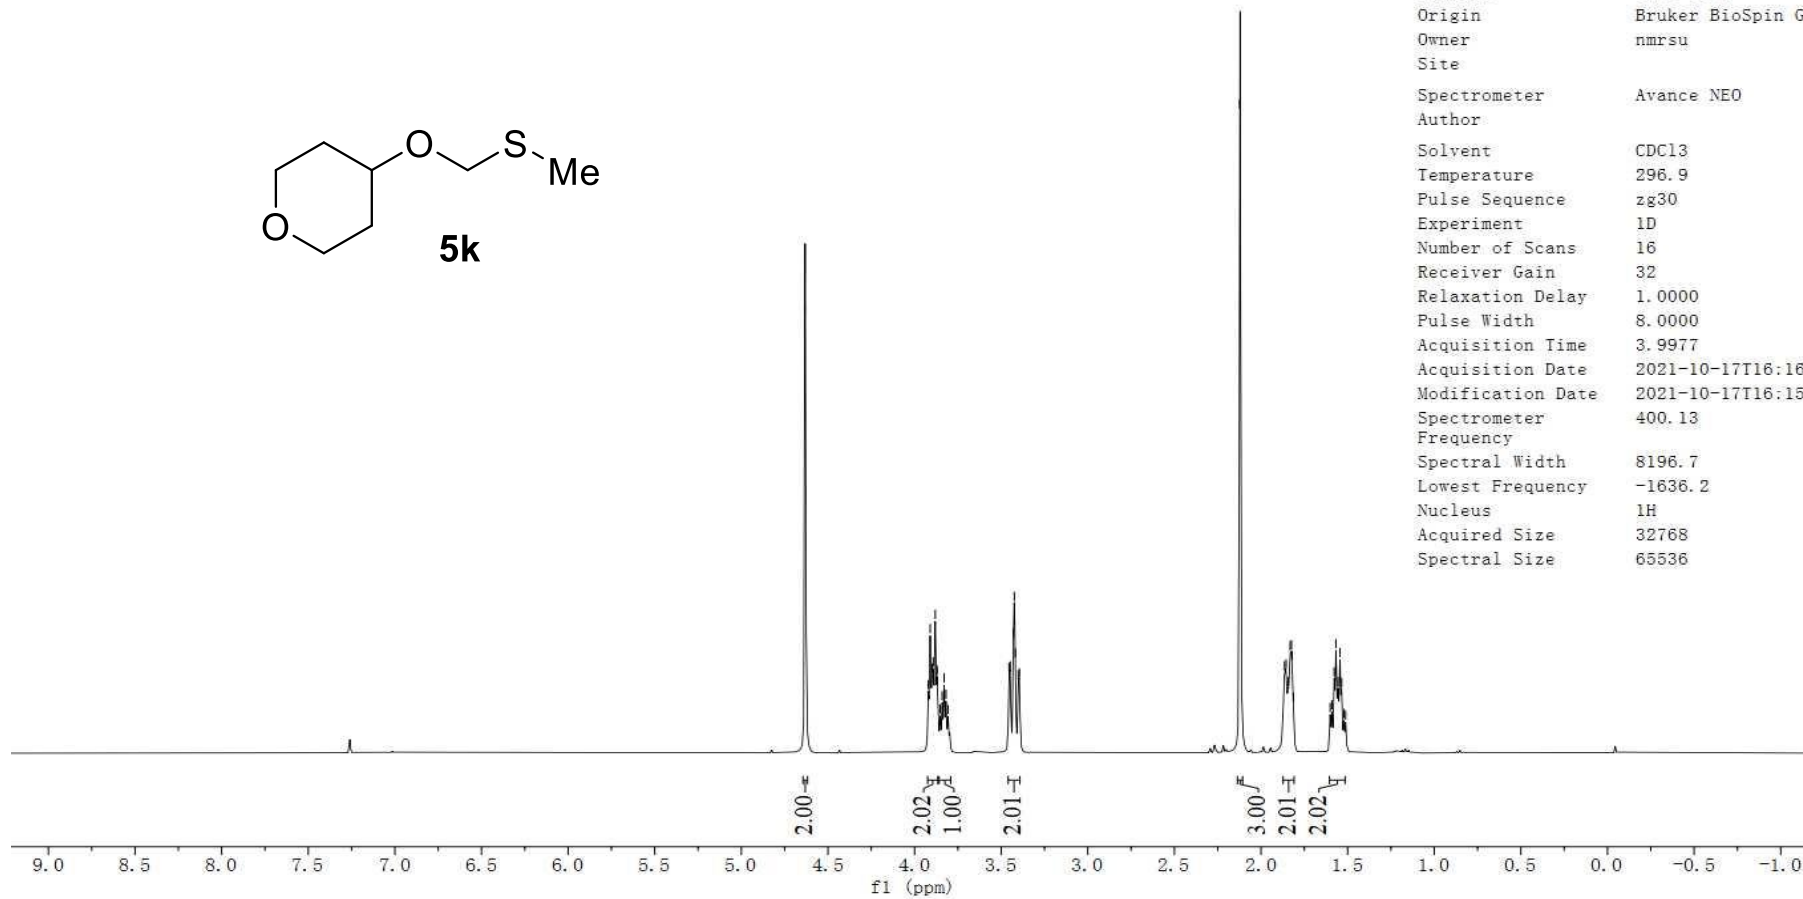



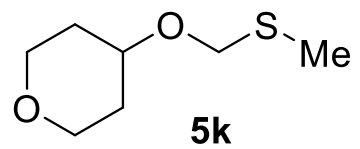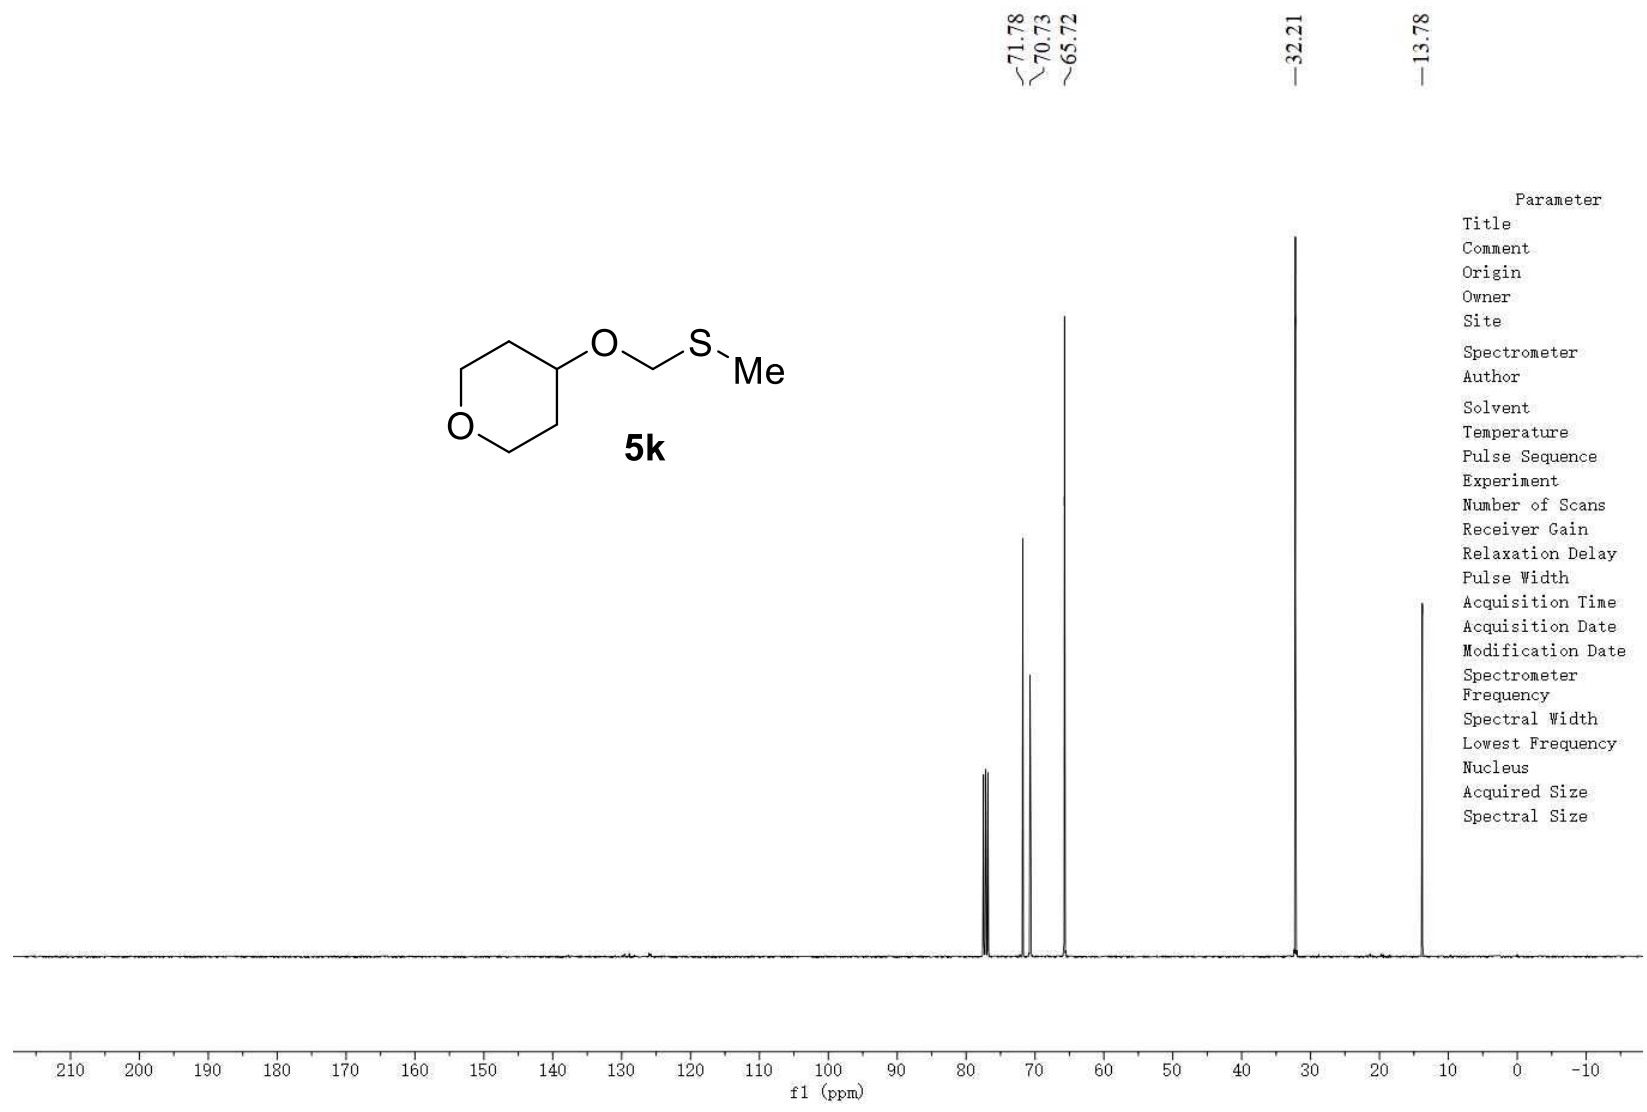

| Parameter         | Value               |
|-------------------|---------------------|
| Title             | CR-B-58.6.fid       |
| Comment           | CR-B-58-C           |
| Origin            | Eruker BioSpin GmbH |
| Owner             | nmrsu               |
| Site              |                     |
| Spectrometer      | Avance NEO          |
| Author            |                     |
| Solvent           | CDCl3               |
| Temperature       | 297.5               |
| Pulse Sequence    | zgpg30              |
| Experiment        | 1D                  |
| Number of Scans   | 1024                |
| Receiver Gain     | 101                 |
| Relaxation Delay  | 2.0000              |
| Pulse Width       | 8.0000              |
| Acquisition Time  | 1.3763              |
| Acquisition Date  | 2021-10-17T17:16:24 |
| Modification Date | 2021-10-17T17:15:44 |
| Spectrometer      | 100.62              |
| Frequency         |                     |
| Spectral Width    | 23809.5             |
| Lowest Frequency  | -1838.3             |
| Nucleus           | 13C                 |
| Acquired Size     | 32768               |
| Spectral Size     | 65536               |

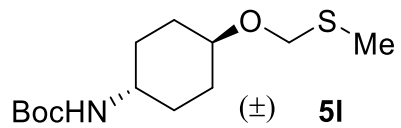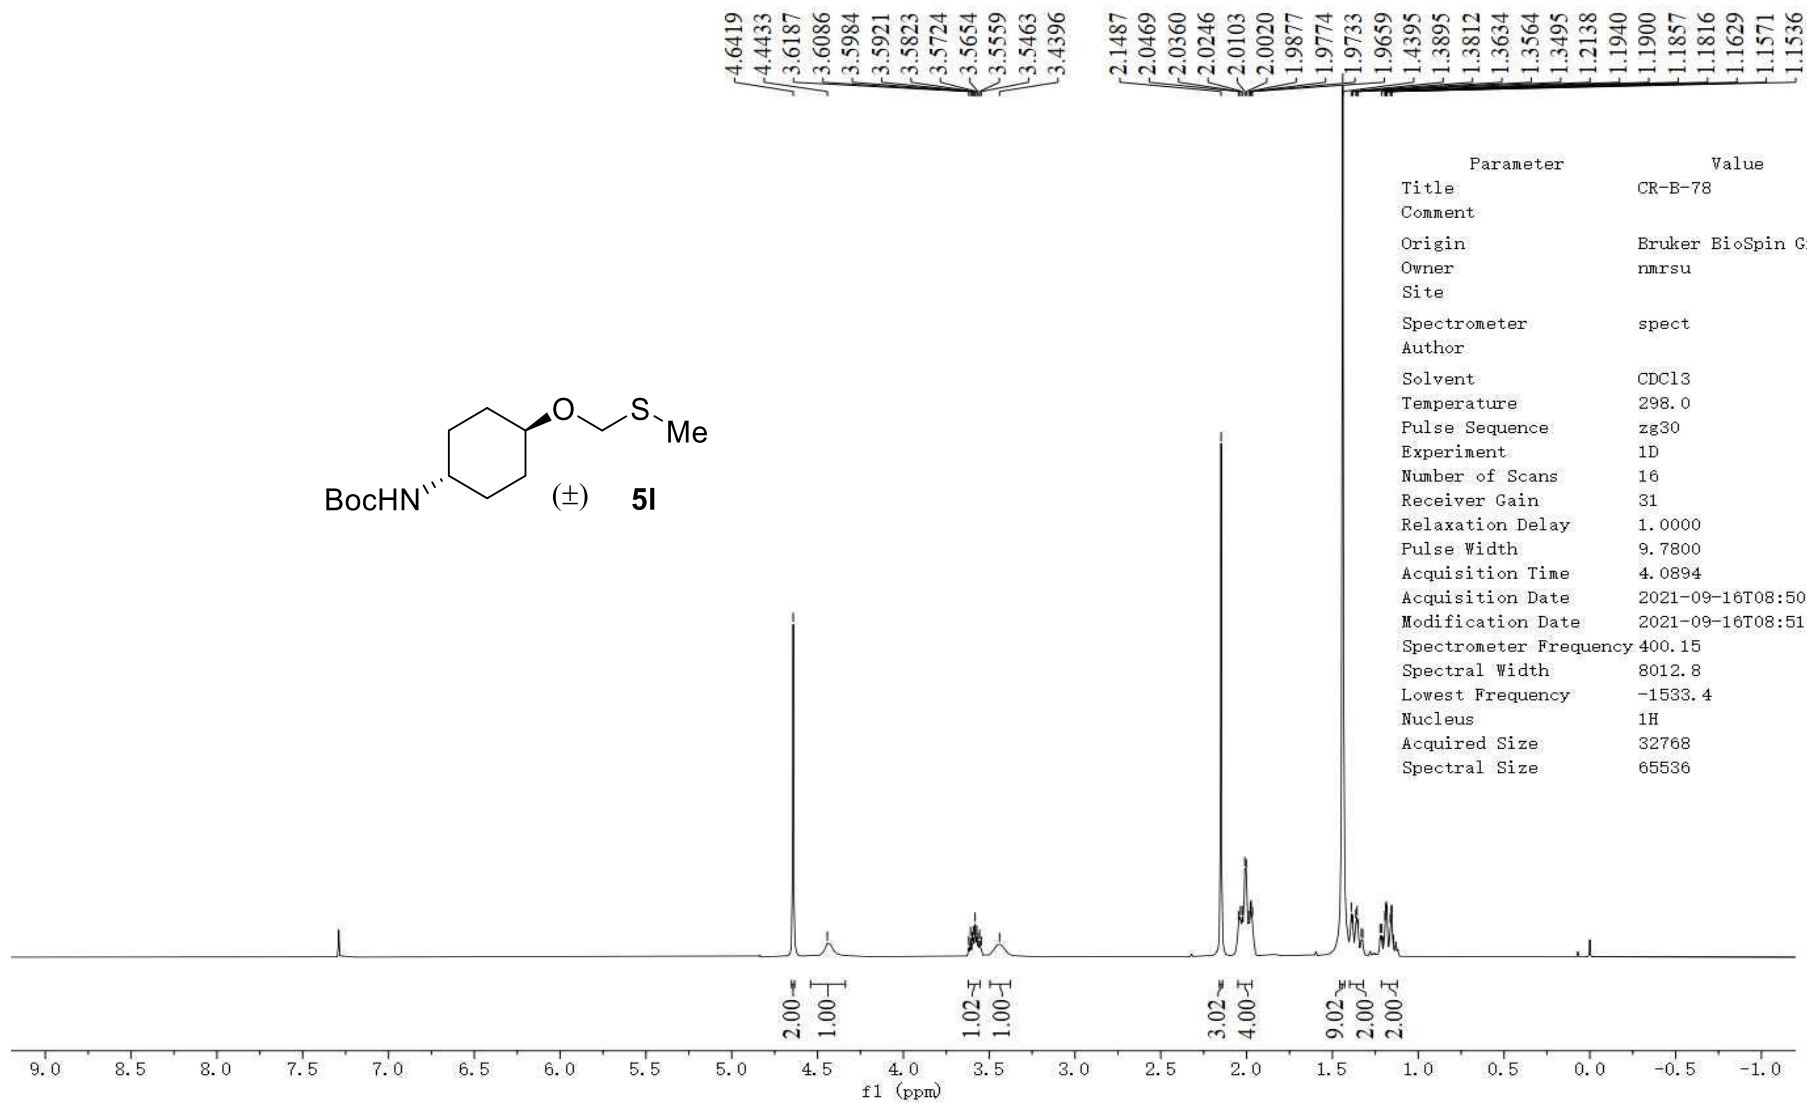

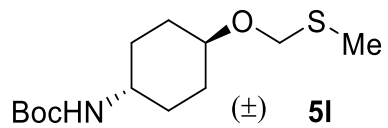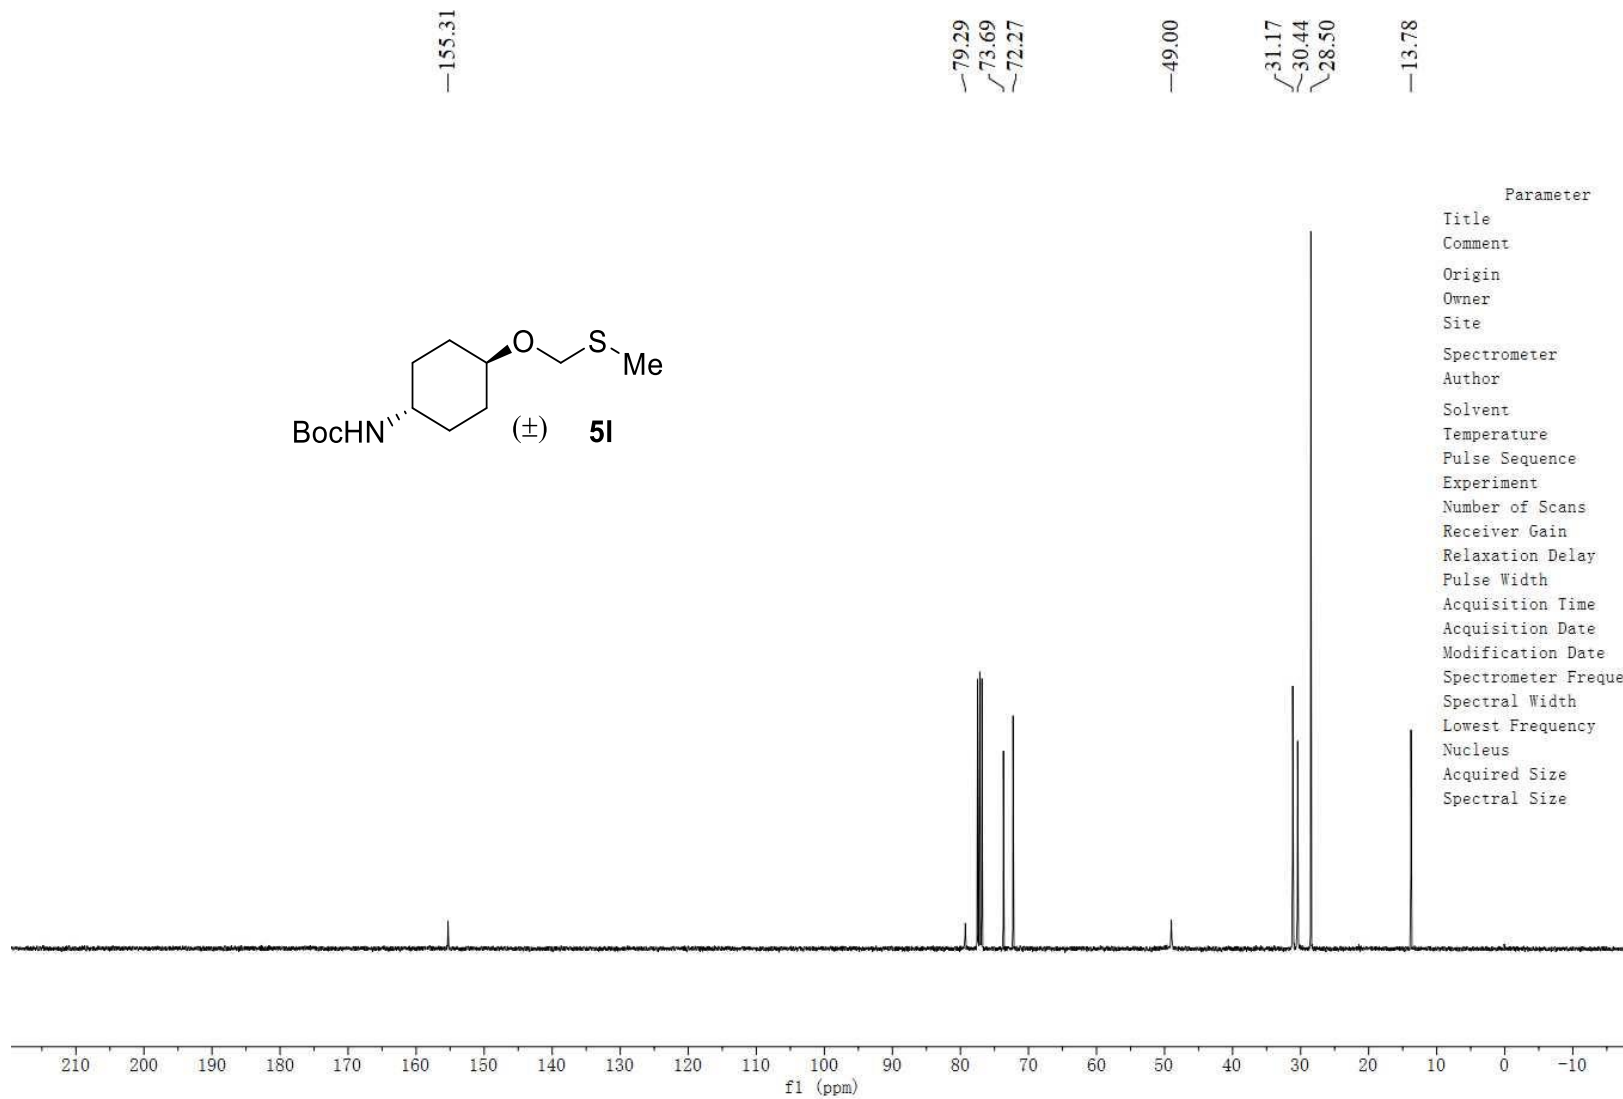

| Parameter              | Value               |
|------------------------|---------------------|
| Title                  | CR-B-78             |
| Comment                |                     |
| Origin                 | Bruker BioSpin GmbH |
| Owner                  | nrsu                |
| Site                   |                     |
| Spectrometer           | spect               |
| Author                 |                     |
| Solvent                | CDCl3               |
| Temperature            | 298.0               |
| Pulse Sequence         | zgpg30              |
| Experiment             | 1D                  |
| Number of Scans        | 300                 |
| Receiver Gain          | 202                 |
| Relaxation Delay       | 2.0000              |
| Pulse Width            | 10.5800             |
| Acquisition Time       | 1.3631              |
| Acquisition Date       | 2021-09-16T09:09:12 |
| Modification Date      | 2021-09-16T09:09:14 |
| Spectrometer Frequency | 100.62              |
| Spectral Width         | 24038.5             |
| Lowest Frequency       | -1948.4             |
| Nucleus                | 13C                 |
| Acquired Size          | 32768               |
| Spectral Size          | 65536               |

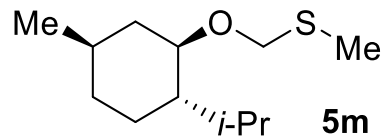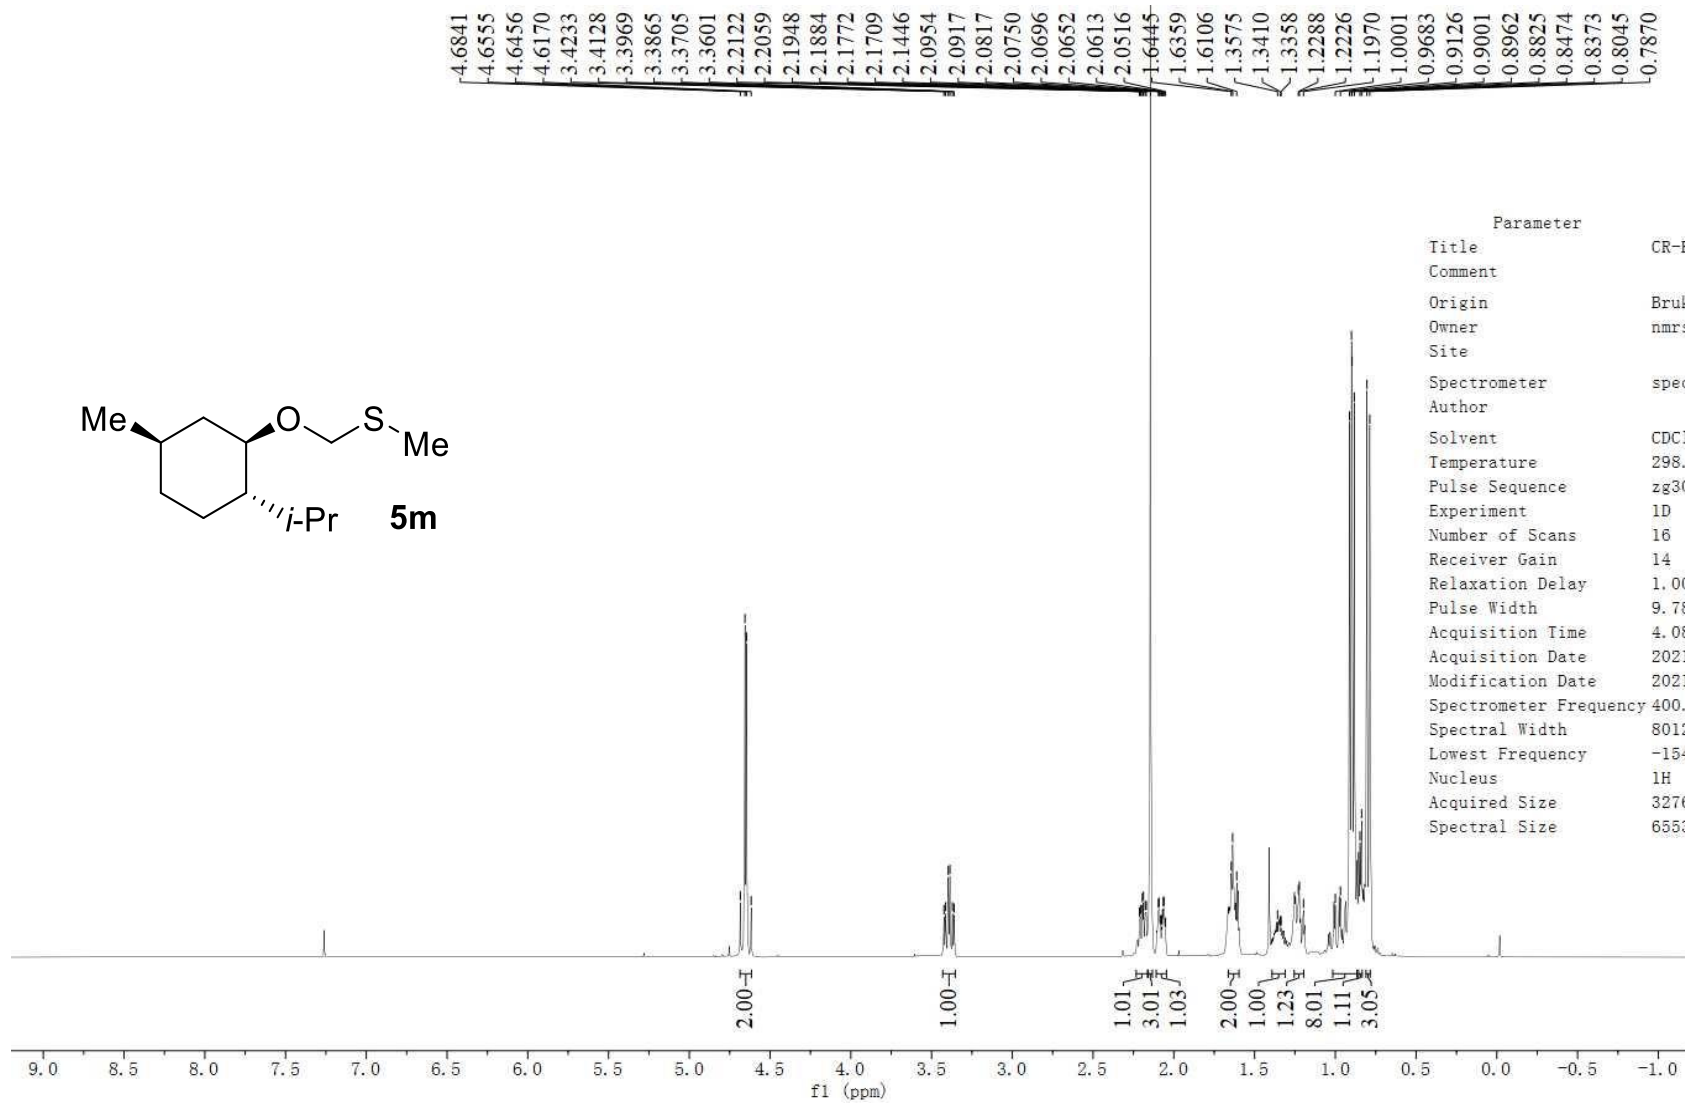

| Parameter              | Value               |
|------------------------|---------------------|
| Title                  | CR-B-82.2.fid       |
| Comment                |                     |
| Origin                 | Bruker BioSpin GmbH |
| Owner                  | nmrsu               |
| Site                   |                     |
| Spectrometer           | spect               |
| Author                 |                     |
| Solvent                | CDCl3               |
| Temperature            | 298.0               |
| Pulse Sequence         | zg30                |
| Experiment             | 1D                  |
| Number of Scans        | 16                  |
| Receiver Gain          | 14                  |
| Relaxation Delay       | 1.0000              |
| Pulse Width            | 9.7800              |
| Acquisition Time       | 4.0894              |
| Acquisition Date       | 2021-09-26T00:34:30 |
| Modification Date      | 2021-09-26T00:34:32 |
| Spectrometer Frequency | 400.15              |
| Spectral Width         | 8012.8              |
| Lowest Frequency       | -1545.7             |
| Nucleus                | 1H                  |
| Acquired Size          | 32768               |
| Spectral Size          | 65536               |

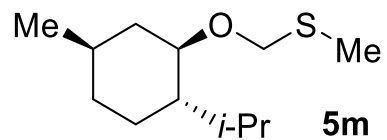

—75.94  
 —72.39  
 —48.43  
 /40.04  
 /34.59  
 /31.56  
 /25.39  
 /23.17  
 /22.44  
 /21.25  
 /15.88  
 /14.20

| Parameter              | Value               |
|------------------------|---------------------|
| Title                  | CR-B-82.3.fid       |
| Comment                |                     |
| Origin                 | Bruker BioSpin GmbH |
| Owner                  | nmrsu               |
| Site                   |                     |
| Spectrometer           | spect               |
| Author                 |                     |
| Solvent                | CDC13               |
| Temperature            | 298.0               |
| Pulse Sequence         | zpg30               |
| Experiment             | 1D                  |
| Number of Scans        | 600                 |
| Receiver Gain          | 202                 |
| Relaxation Delay       | 2.0000              |
| Pulse Width            | 10.5800             |
| Acquisition Time       | 1.3631              |
| Acquisition Date       | 2021-09-26T01:09:52 |
| Modification Date      | 2021-09-26T01:09:54 |
| Spectrometer Frequency | 100.63              |
| Spectral Width         | 24038.5             |
| Lowest Frequency       | -1946.4             |
| Nucleus                | 13C                 |
| Acquired Size          | 32768               |
| Spectral Size          | 65536               |

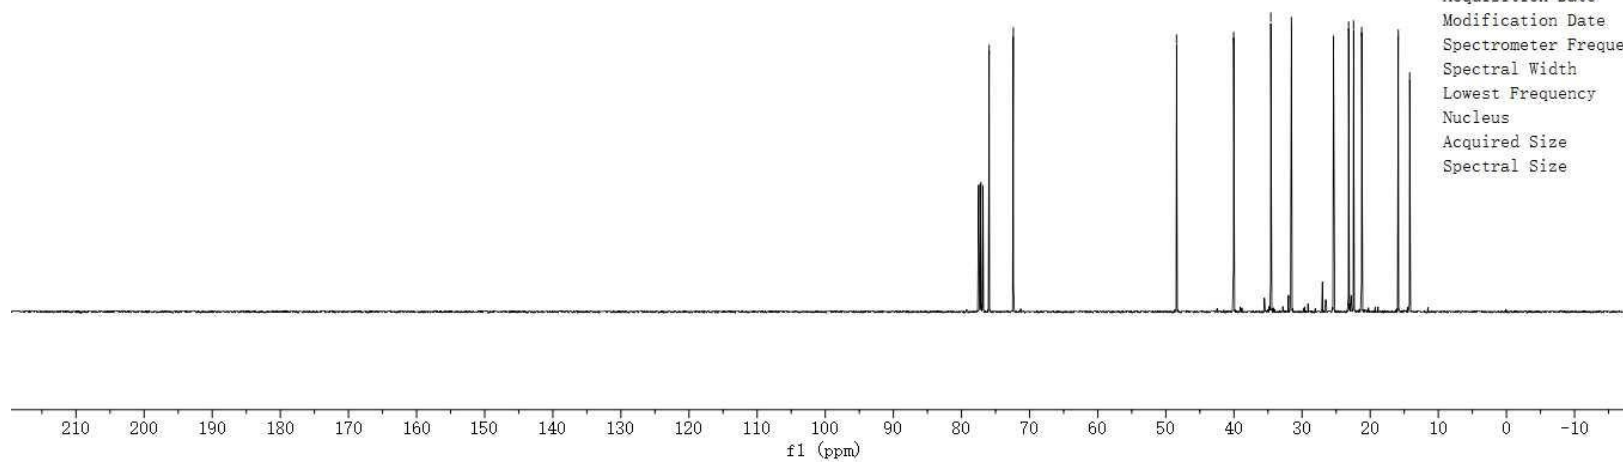

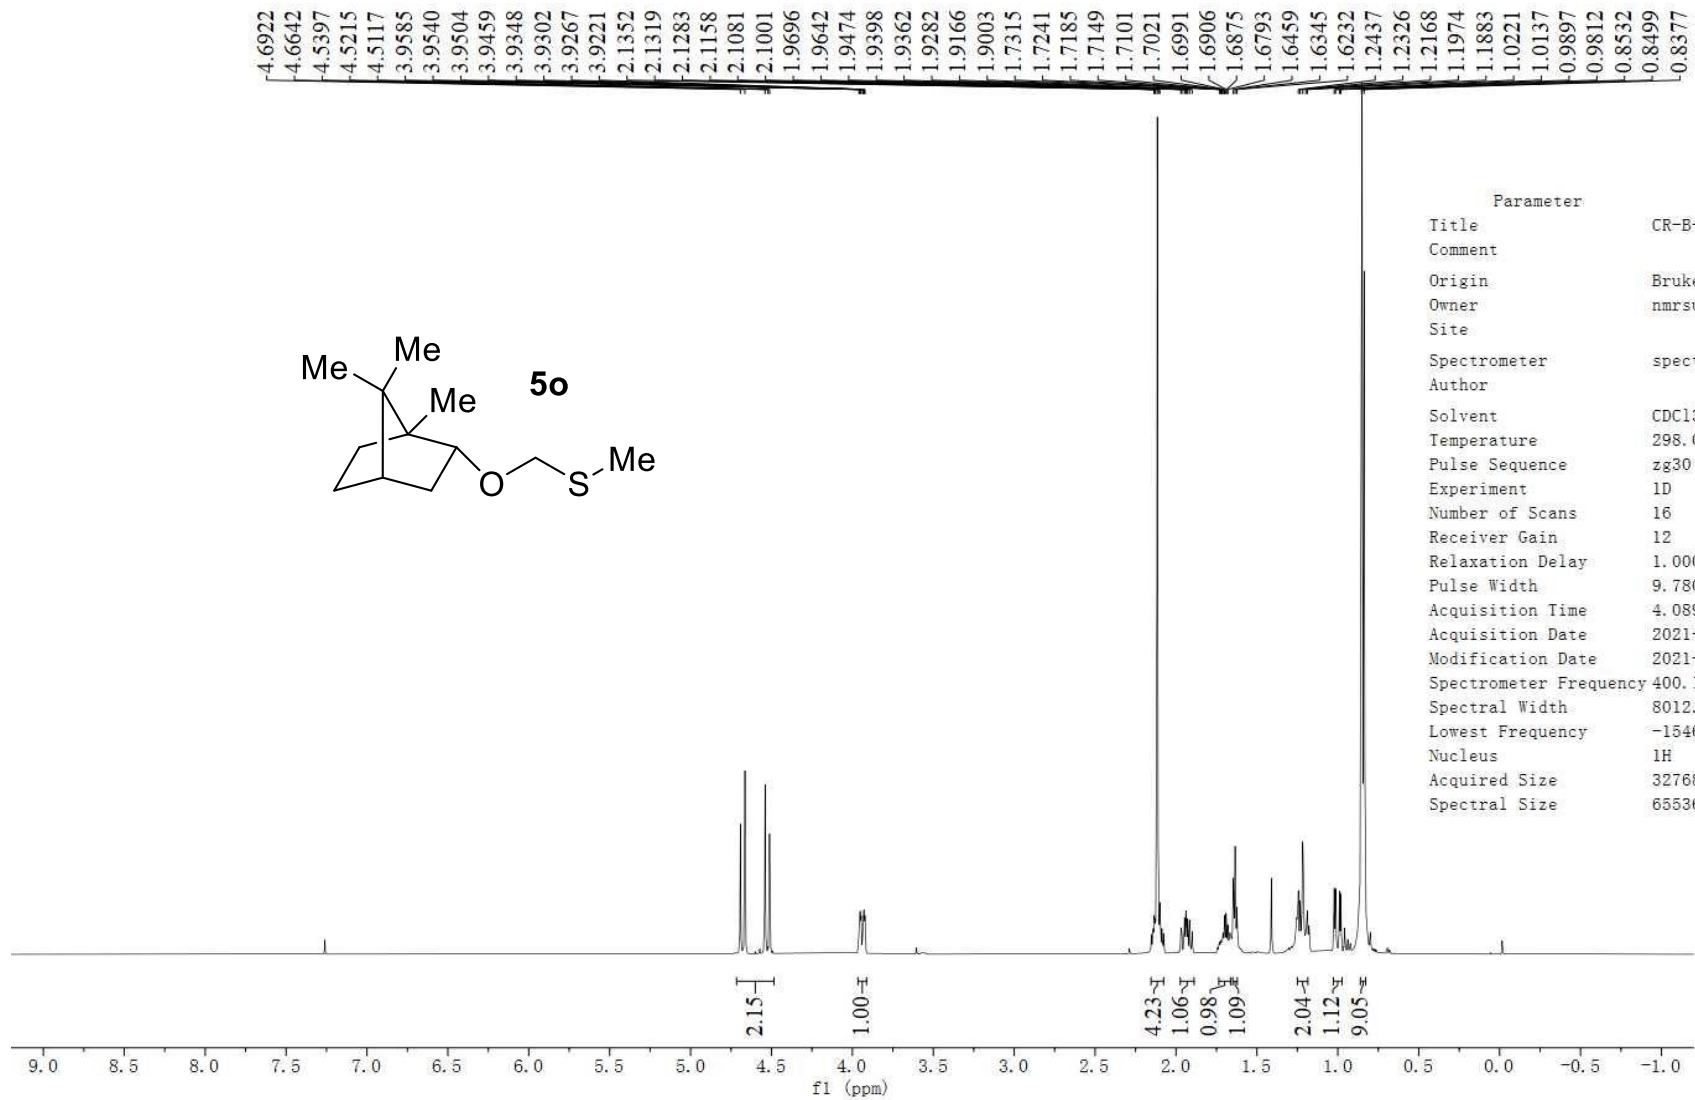

| Parameter              | Value               |
|------------------------|---------------------|
| Title                  | CR-B-84             |
| Comment                |                     |
| Origin                 | Bruker BioSpin GmbH |
| Owner                  | nmsu                |
| Site                   |                     |
| Spectrometer           | spect               |
| Author                 |                     |
| Solvent                | CDC13               |
| Temperature            | 298.0               |
| Pulse Sequence         | zg30                |
| Experiment             | 1D                  |
| Number of Scans        | 16                  |
| Receiver Gain          | 12                  |
| Relaxation Delay       | 1.0000              |
| Pulse Width            | 9.7800              |
| Acquisition Time       | 4.0894              |
| Acquisition Date       | 2021-09-26T03:17:55 |
| Modification Date      | 2021-09-26T03:17:56 |
| Spectrometer Frequency | 400.15              |
| Spectral Width         | 8012.8              |
| Lowest Frequency       | -1546.0             |
| Nucleus                | 1H                  |
| Acquired Size          | 32768               |
| Spectral Size          | 65536               |

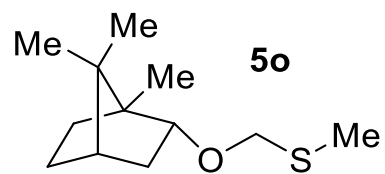

—81.64  
 —73.99  
 ~49.02  
 ~47.88  
 ~45.15  
 ~35.89  
 ~28.33  
 ~27.00  
 ~19.84  
 ~19.01  
 ~13.87  
 ~13.69

| Parameter              | Value               |
|------------------------|---------------------|
| Title                  | CR-B-84             |
| Comment                |                     |
| Origin                 | Bruker BioSpin GmbH |
| Owner                  | nmsru               |
| Site                   |                     |
| Spectrometer           | spect               |
| Author                 |                     |
| Solvent                | CDCl3               |
| Temperature            | 298.0               |
| Pulse Sequence         | zgpg30              |
| Experiment             | 1D                  |
| Number of Scans        | 600                 |
| Receiver Gain          | 202                 |
| Relaxation Delay       | 2.0000              |
| Pulse Width            | 10.5800             |
| Acquisition Time       | 1.3631              |
| Acquisition Date       | 2021-09-26T03:53:16 |
| Modification Date      | 2021-09-26T03:53:18 |
| Spectrometer Frequency | 100.62              |
| Spectral Width         | 24038.5             |
| Lowest Frequency       | -1947.5             |
| Nucleus                | 13C                 |
| Acquired Size          | 32768               |
| Spectral Size          | 65536               |

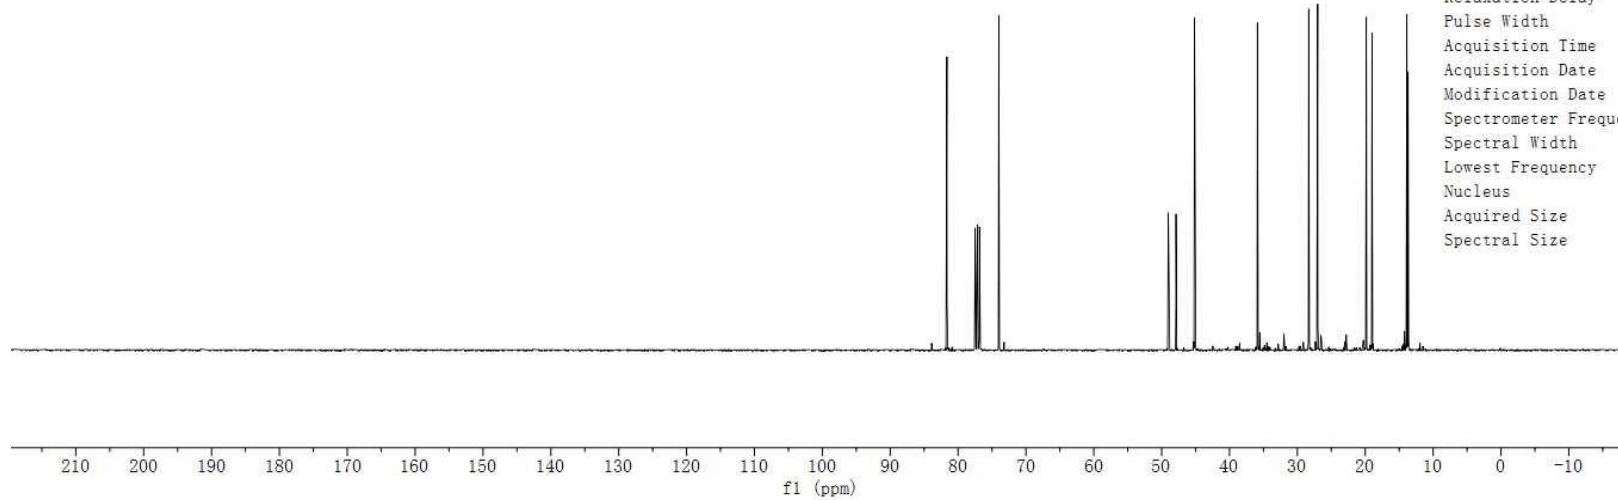

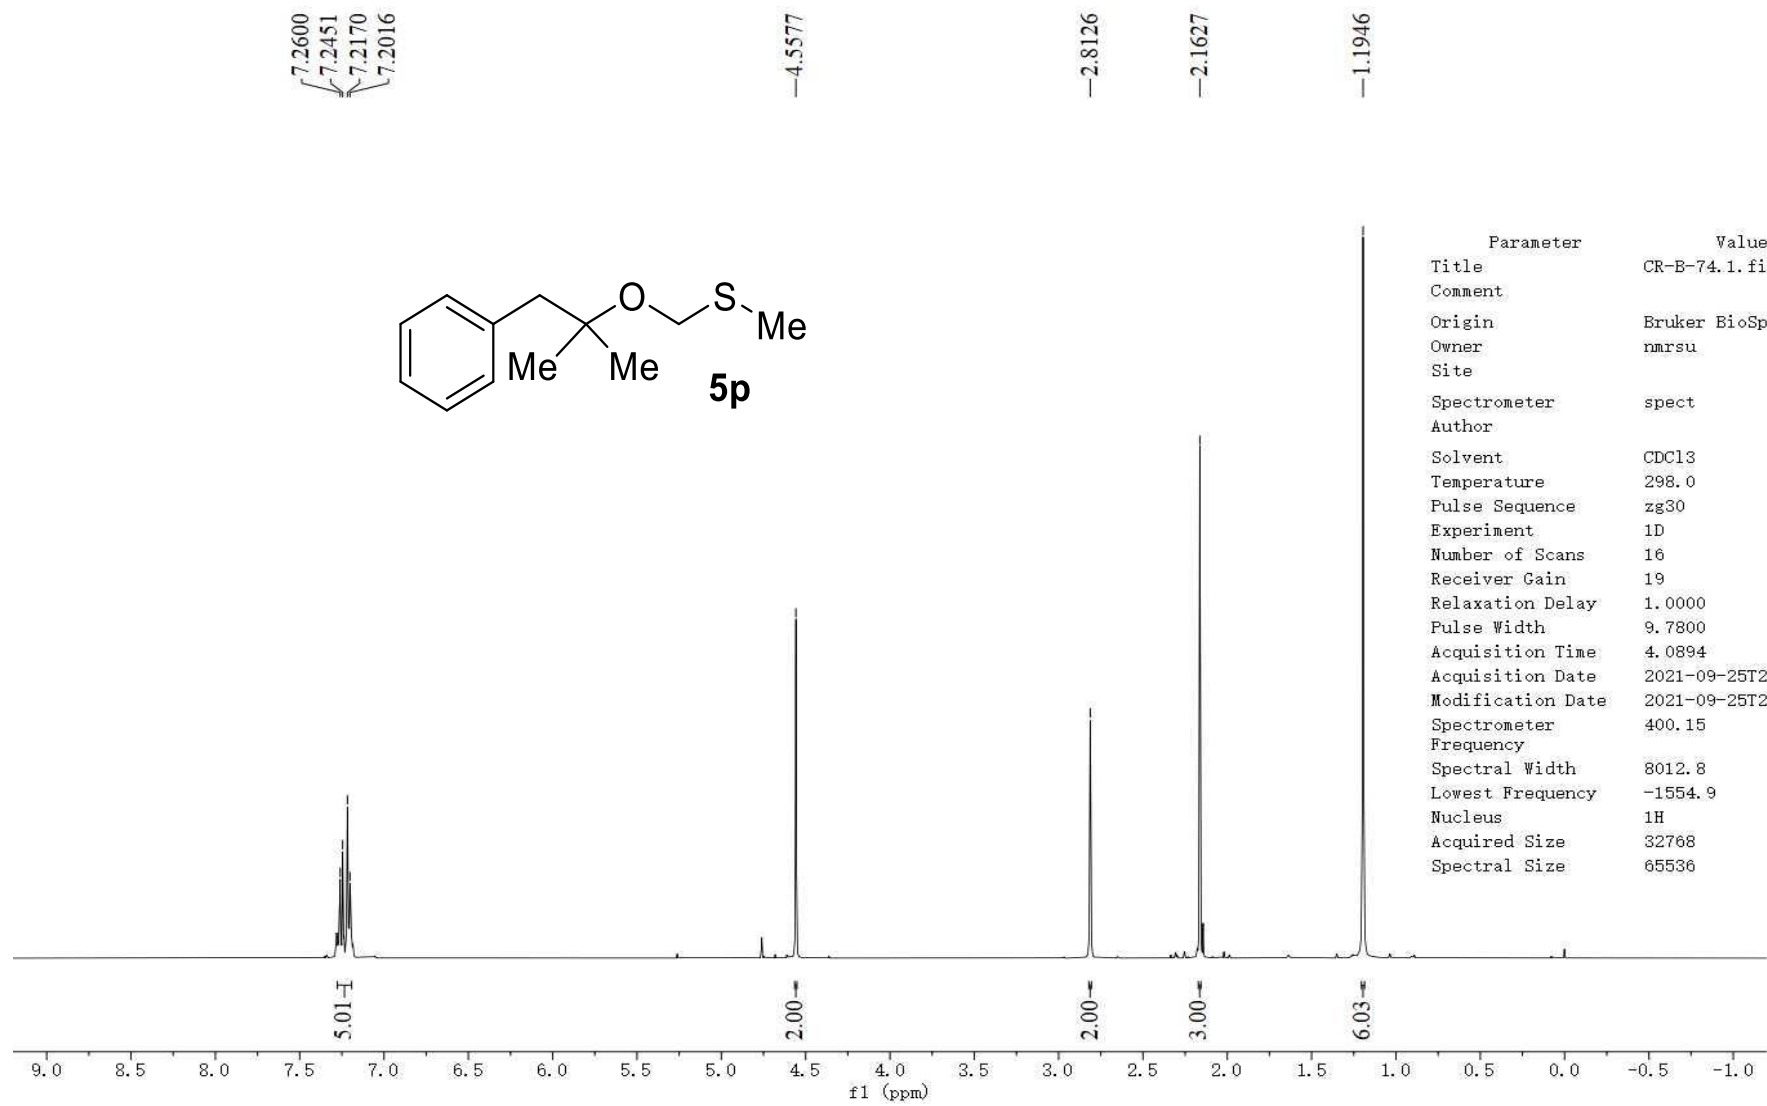

| Parameter         | Value               |
|-------------------|---------------------|
| Title             | CR-B-74.1.fid       |
| Comment           |                     |
| Origin            | Bruker BioSpin GmbH |
| Owner             | mrsu                |
| Site              |                     |
| Spectrometer      | spect               |
| Author            |                     |
| Solvent           | CDCl3               |
| Temperature       | 298.0               |
| Pulse Sequence    | zg30                |
| Experiment        | 1D                  |
| Number of Scans   | 16                  |
| Receiver Gain     | 19                  |
| Relaxation Delay  | 1.0000              |
| Pulse Width       | 9.7800              |
| Acquisition Time  | 4.0894              |
| Acquisition Date  | 2021-09-25T23:53:28 |
| Modification Date | 2021-09-25T23:53:30 |
| Spectrometer      | 400.15              |
| Frequency         |                     |
| Spectral Width    | 8012.8              |
| Lowest Frequency  | -1554.9             |
| Nucleus           | 1H                  |
| Acquired Size     | 32768               |
| Spectral Size     | 65536               |



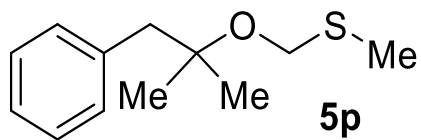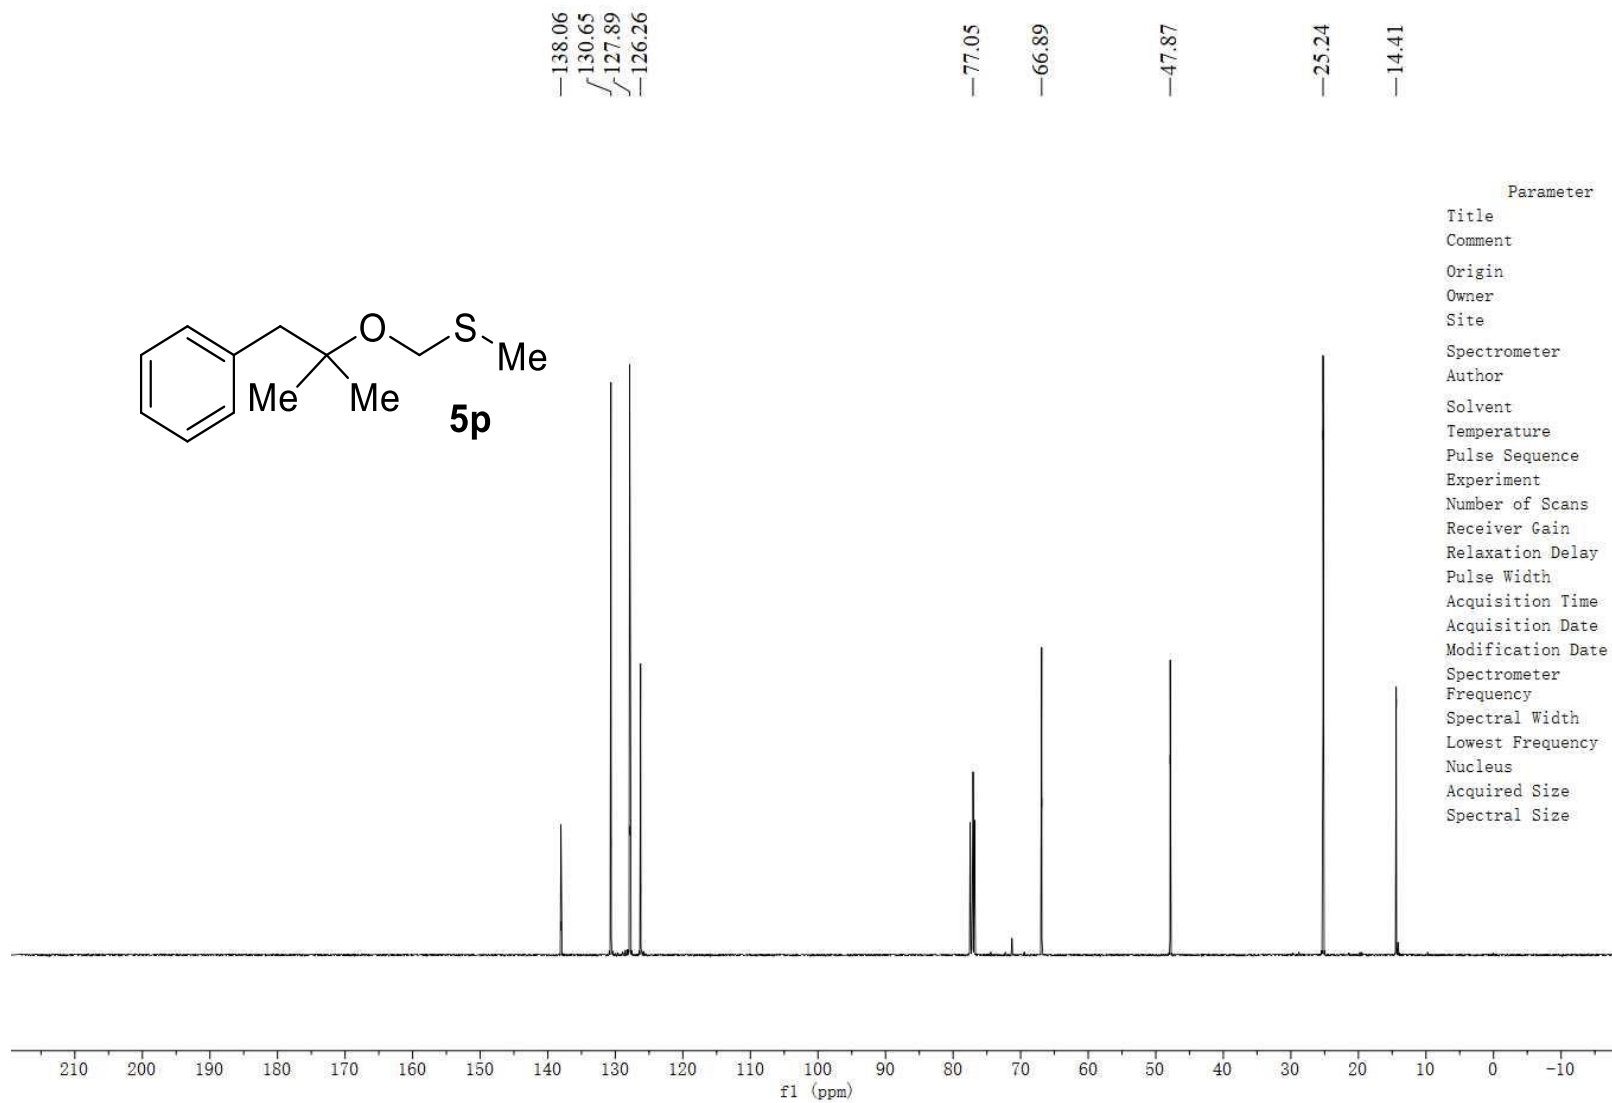

| Parameter              | Value               |
|------------------------|---------------------|
| Title                  | CR-B-74. 2. fid     |
| Comment                |                     |
| Origin                 | Bruker BioSpin GmbH |
| Owner                  | nmrsu               |
| Site                   |                     |
| Spectrometer           | spect               |
| Author                 |                     |
| Solvent                | CDCl3               |
| Temperature            | 298.0               |
| Pulse Sequence         | zgpg30              |
| Experiment             | 1D                  |
| Number of Scans        | 600                 |
| Receiver Gain          | 202                 |
| Relaxation Delay       | 2.0000              |
| Pulse Width            | 10.5800             |
| Acquisition Time       | 1.3631              |
| Acquisition Date       | 2021-09-26T00:28:49 |
| Modification Date      | 2021-09-26T00:28:50 |
| Spectrometer Frequency | 100.63              |
| Spectral Width         | 24038.5             |
| Lowest Frequency       | -1955.5             |
| Nucleus                | 13C                 |
| Acquired Size          | 32768               |
| Spectral Size          | 65536               |

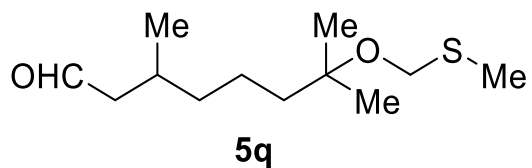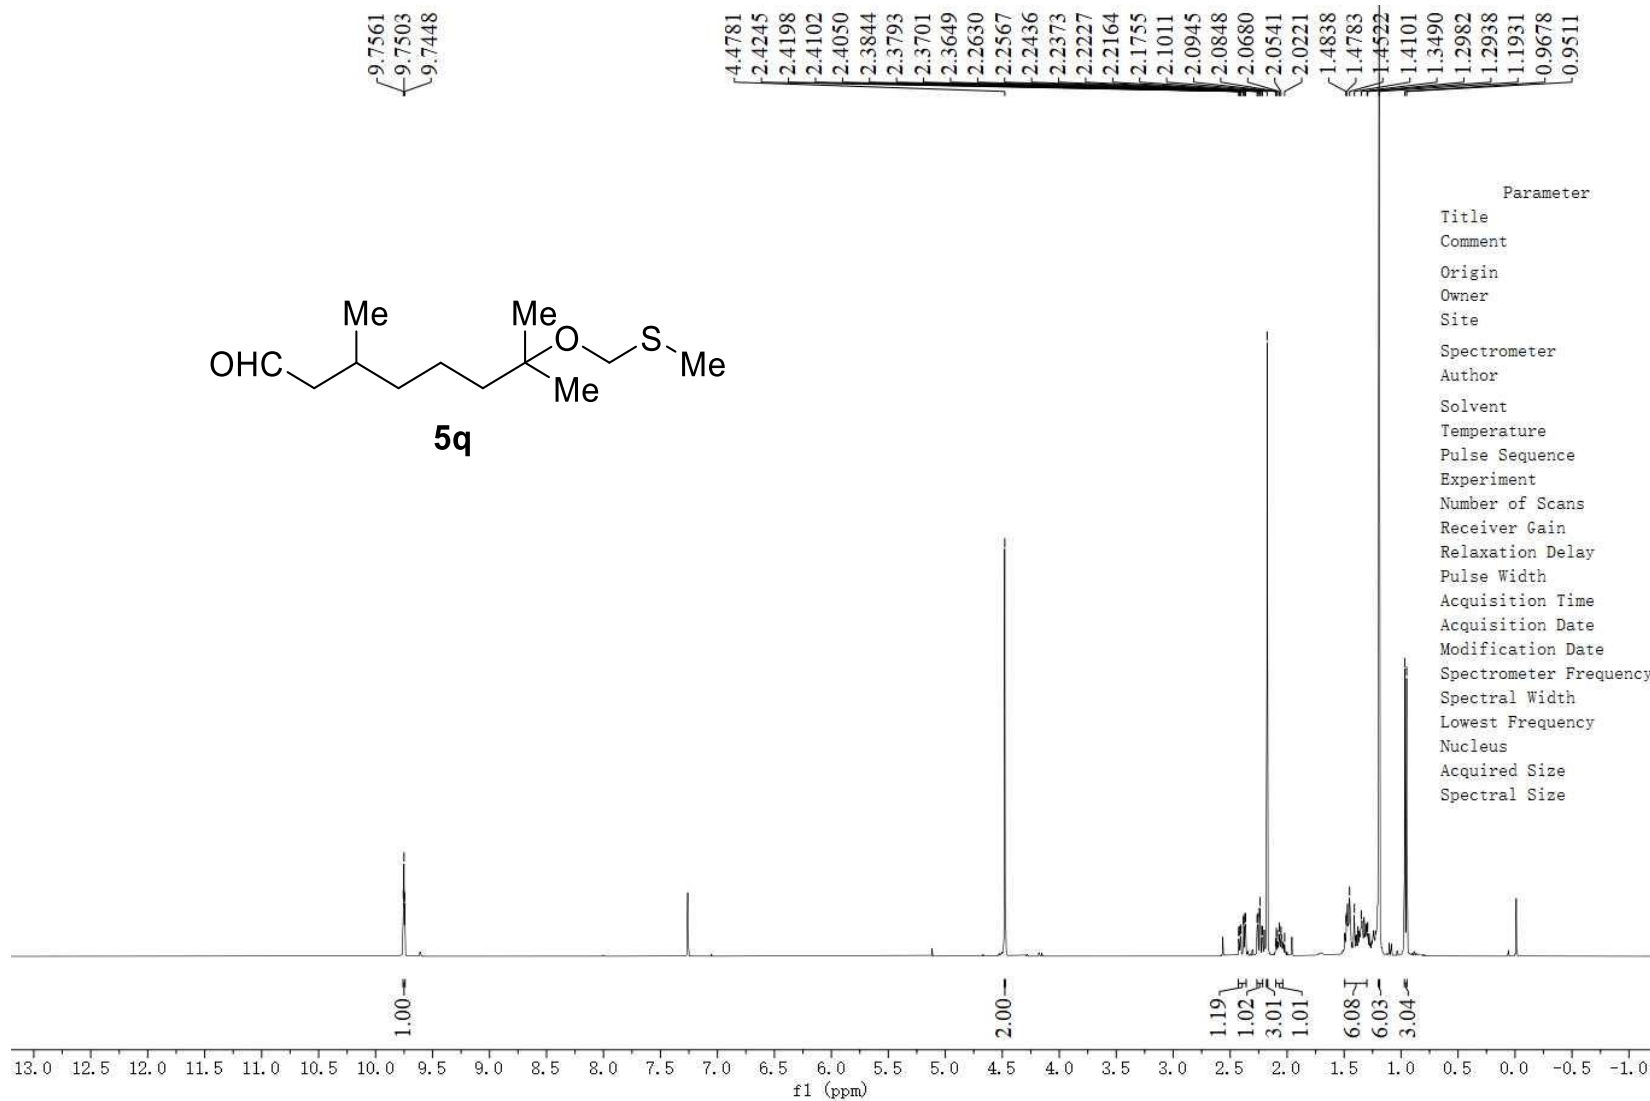

| Parameter              | Value               |
|------------------------|---------------------|
| Title                  | CR-B-88             |
| Comment                |                     |
| Origin                 | Bruker BioSpin GmbH |
| Owner                  | nmrsu               |
| Site                   |                     |
| Spectrometer           | spect               |
| Author                 |                     |
| Solvent                | CDC13               |
| Temperature            | 298.0               |
| Pulse Sequence         | zg30                |
| Experiment             | 1D                  |
| Number of Scans        | 16                  |
| Receiver Gain          | 64                  |
| Relaxation Delay       | 1.0000              |
| Pulse Width            | 9.7800              |
| Acquisition Time       | 4.0894              |
| Acquisition Date       | 2021-09-25T01:14:48 |
| Modification Date      | 2021-09-25T01:14:50 |
| Spectrometer Frequency | 400.15              |
| Spectral Width         | 8012.8              |
| Lowest Frequency       | -1545.7             |
| Nucleus                | <sup>1</sup> H      |
| Acquired Size          | 32768               |
| Spectral Size          | 65536               |

-203.09

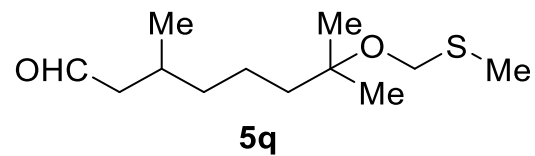

-76.59  
-66.76  
-51.19  
-41.02  
-37.42  
28.25  
25.73  
25.71  
21.35  
20.07  
14.56

| Parameter         | Value               |
|-------------------|---------------------|
| Title             | CR-B-88             |
| Comment           |                     |
| Origin            | Bruker BioSpin GmbH |
| Owner             | nmsu                |
| Site              |                     |
| Spectrometer      | spect               |
| Author            |                     |
| Solvent           | CDCl3               |
| Temperature       | 298.0               |
| Pulse Sequence    | zgpg30              |
| Experiment        | 1D                  |
| Number of Scans   | 600                 |
| Receiver Gain     | 202                 |
| Relaxation Delay  | 2.0000              |
| Pulse Width       | 10.5800             |
| Acquisition Time  | 1.3631              |
| Acquisition Date  | 2021-09-25T01:50:09 |
| Modification Date | 2021-09-25T01:50:10 |
| Spectrometer      | 100.62              |
| Frequency         |                     |
| Spectral Width    | 24038.5             |
| Lowest Frequency  | -1945.9             |
| Nucleus           | 13C                 |
| Acquired Size     | 32768               |
| Spectral Size     | 65536               |

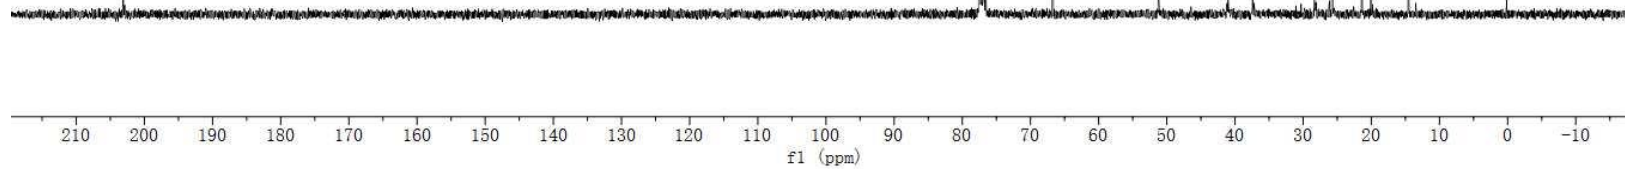

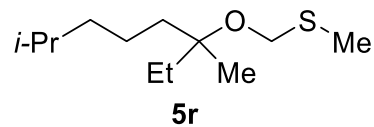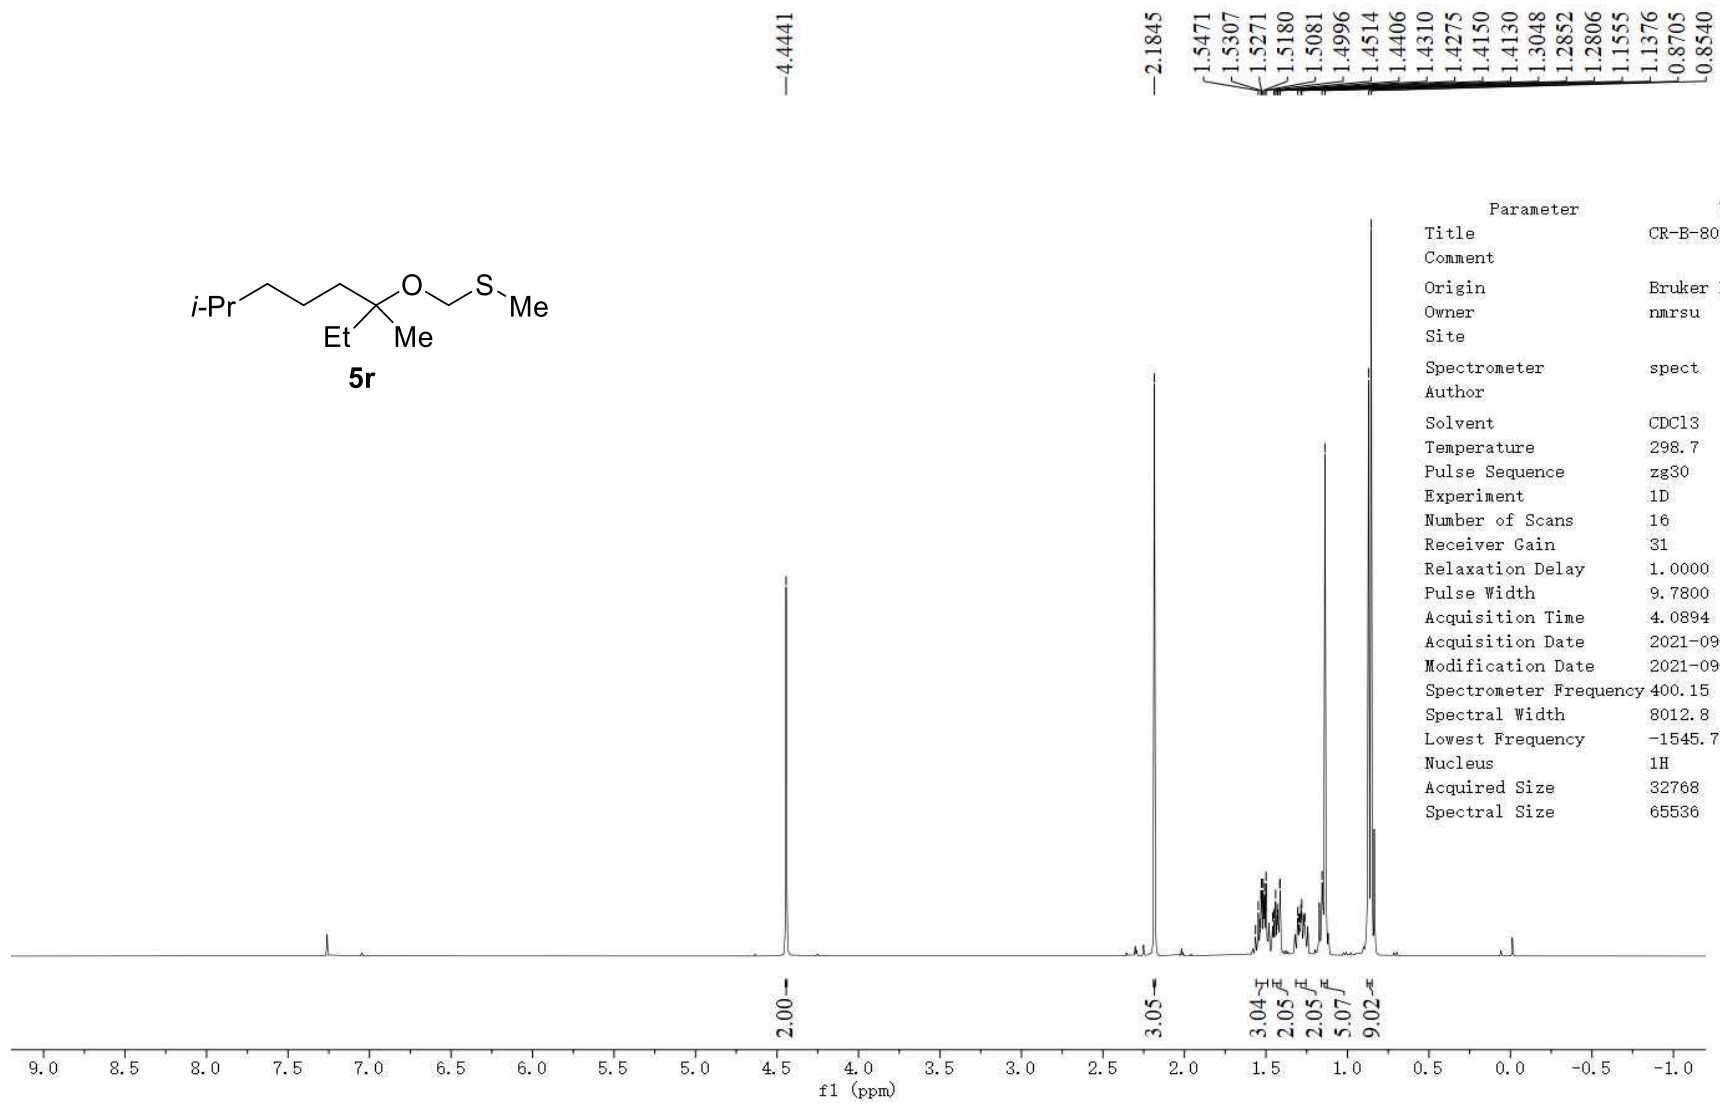

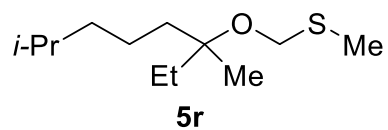

—78.90  
—66.22  
39.65  
38.14  
30.78  
28.04  
22.82  
22.75  
22.73  
21.38  
14.64  
8.13

| Parameter              | Value               |
|------------------------|---------------------|
| Title                  | CR-B-80. 2. fid     |
| Comment                |                     |
| Origin                 | Bruker BioSpin GmbH |
| Owner                  | nmrsu               |
| Site                   |                     |
| Spectrometer           | spect               |
| Author                 |                     |
| Solvent                | CDCl <sub>3</sub>   |
| Temperature            | 299.3               |
| Pulse Sequence         | zgpg30              |
| Experiment             | 1D                  |
| Number of Scans        | 700                 |
| Receiver Gain          | 202                 |
| Relaxation Delay       | 2.0000              |
| Pulse Width            | 10.5800             |
| Acquisition Time       | 1.3631              |
| Acquisition Date       | 2021-09-15T07:22:22 |
| Modification Date      | 2021-09-15T07:22:24 |
| Spectrometer Frequency | 100.63              |
| Spectral Width         | 24038.5             |
| Lowest Frequency       | -1946.0             |
| Nucleus                | 13C                 |
| Acquired Size          | 32768               |
| Spectral Size          | 65536               |

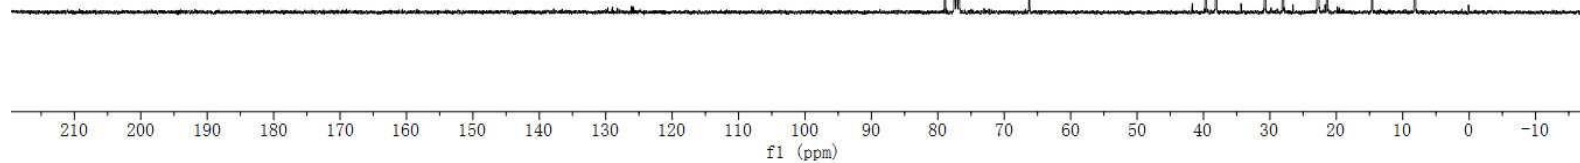

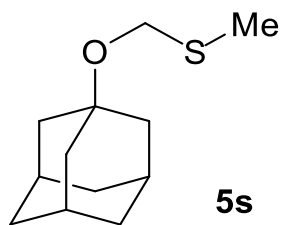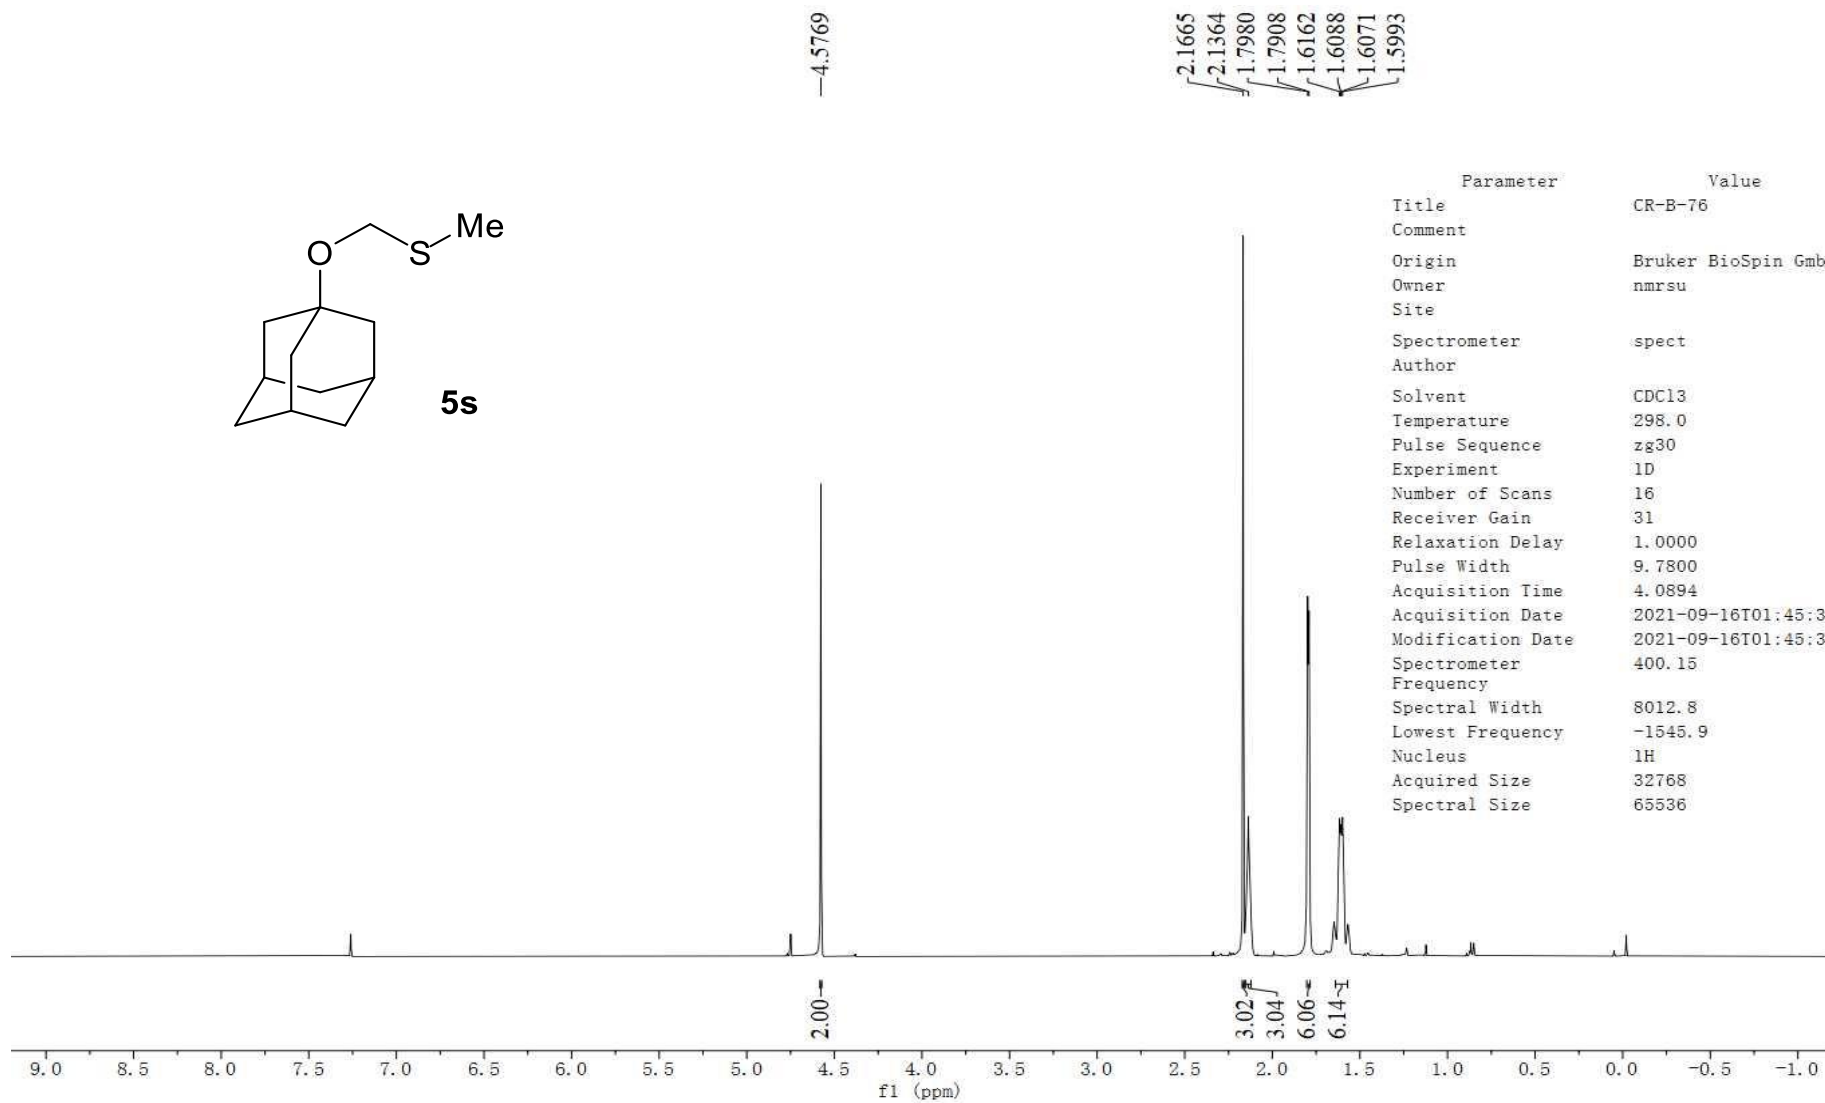

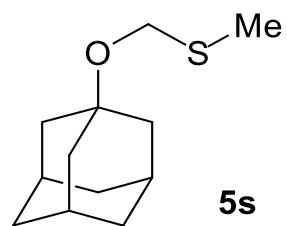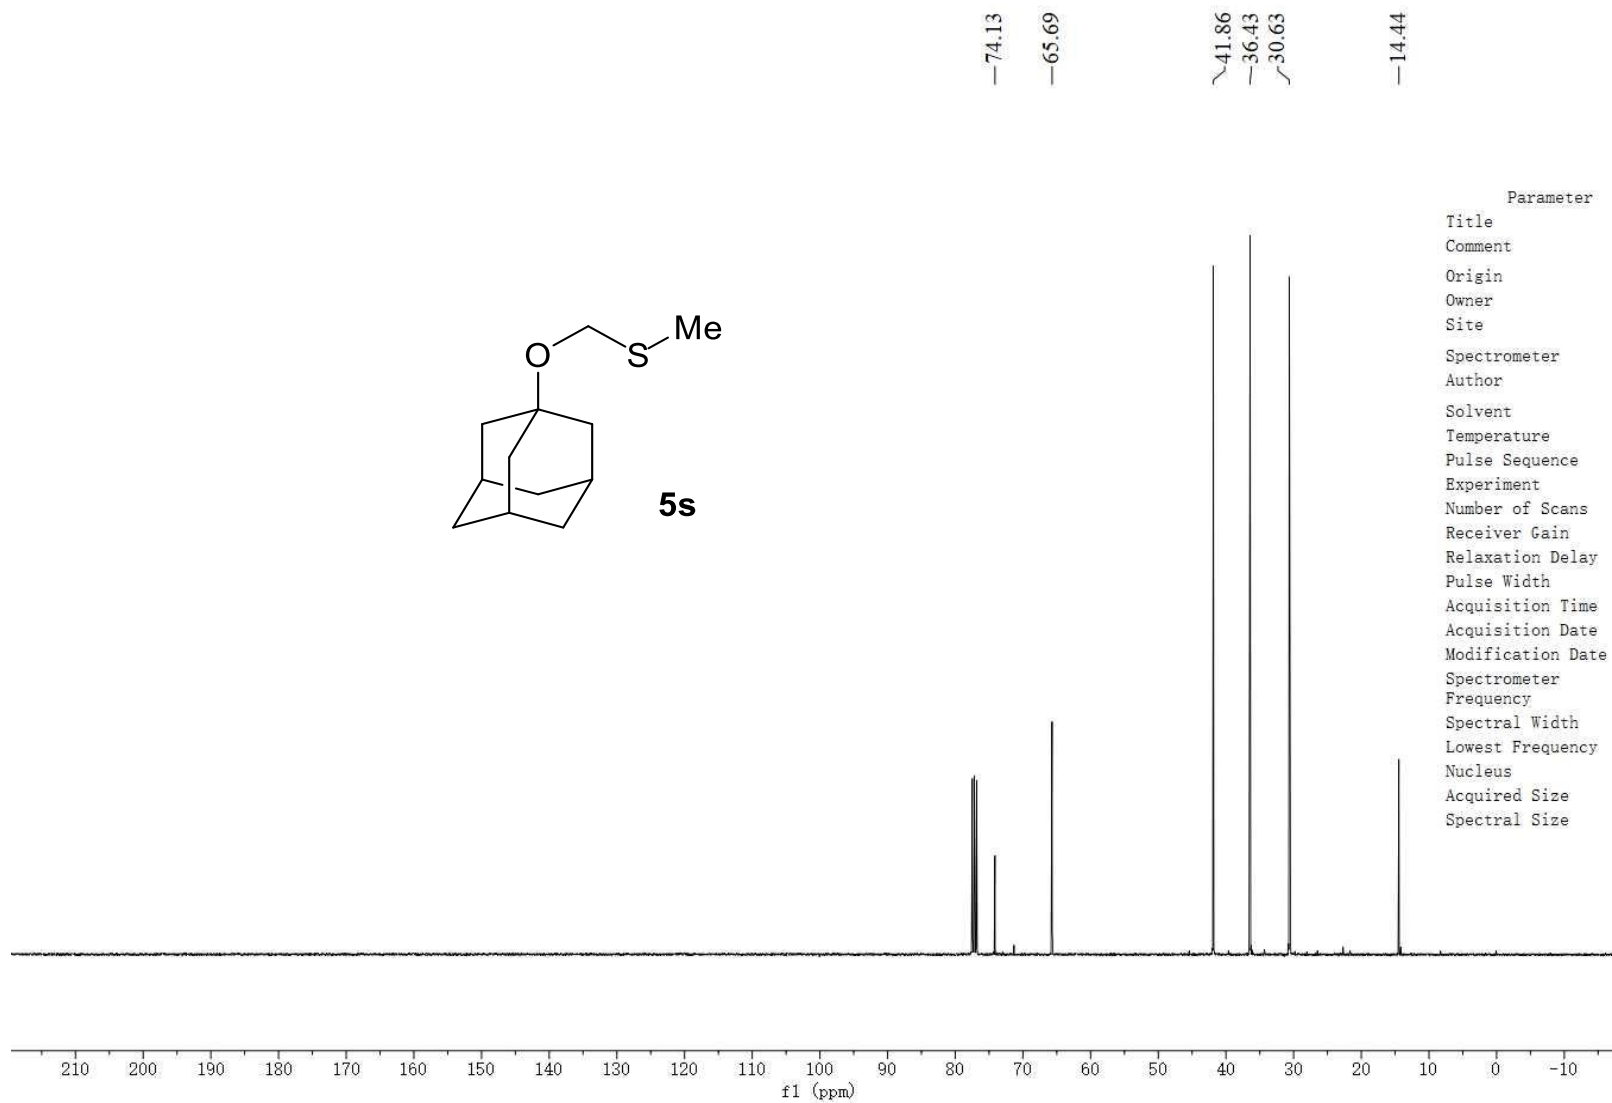

| Parameter              | Value               |
|------------------------|---------------------|
| Title                  | CR-B-76             |
| Comment                |                     |
| Origin                 | Bruker BioSpin GmbH |
| Owner                  | nmrsu               |
| Site                   |                     |
| Spectrometer           | spect               |
| Author                 |                     |
| Solvent                | CDCl3               |
| Temperature            | 298.3               |
| Pulse Sequence         | zgpg30              |
| Experiment             | 1D                  |
| Number of Scans        | 500                 |
| Receiver Gain          | 202                 |
| Relaxation Delay       | 2.0000              |
| Pulse Width            | 10.5800             |
| Acquisition Time       | 1.3631              |
| Acquisition Date       | 2021-09-16T02:15:09 |
| Modification Date      | 2021-09-16T02:15:10 |
| Spectrometer Frequency | 100.62              |
| Spectral Width         | 24038.5             |
| Lowest Frequency       | -1949.4             |
| Nucleus                | 13C                 |
| Acquired Size          | 32768               |
| Spectral Size          | 65536               |

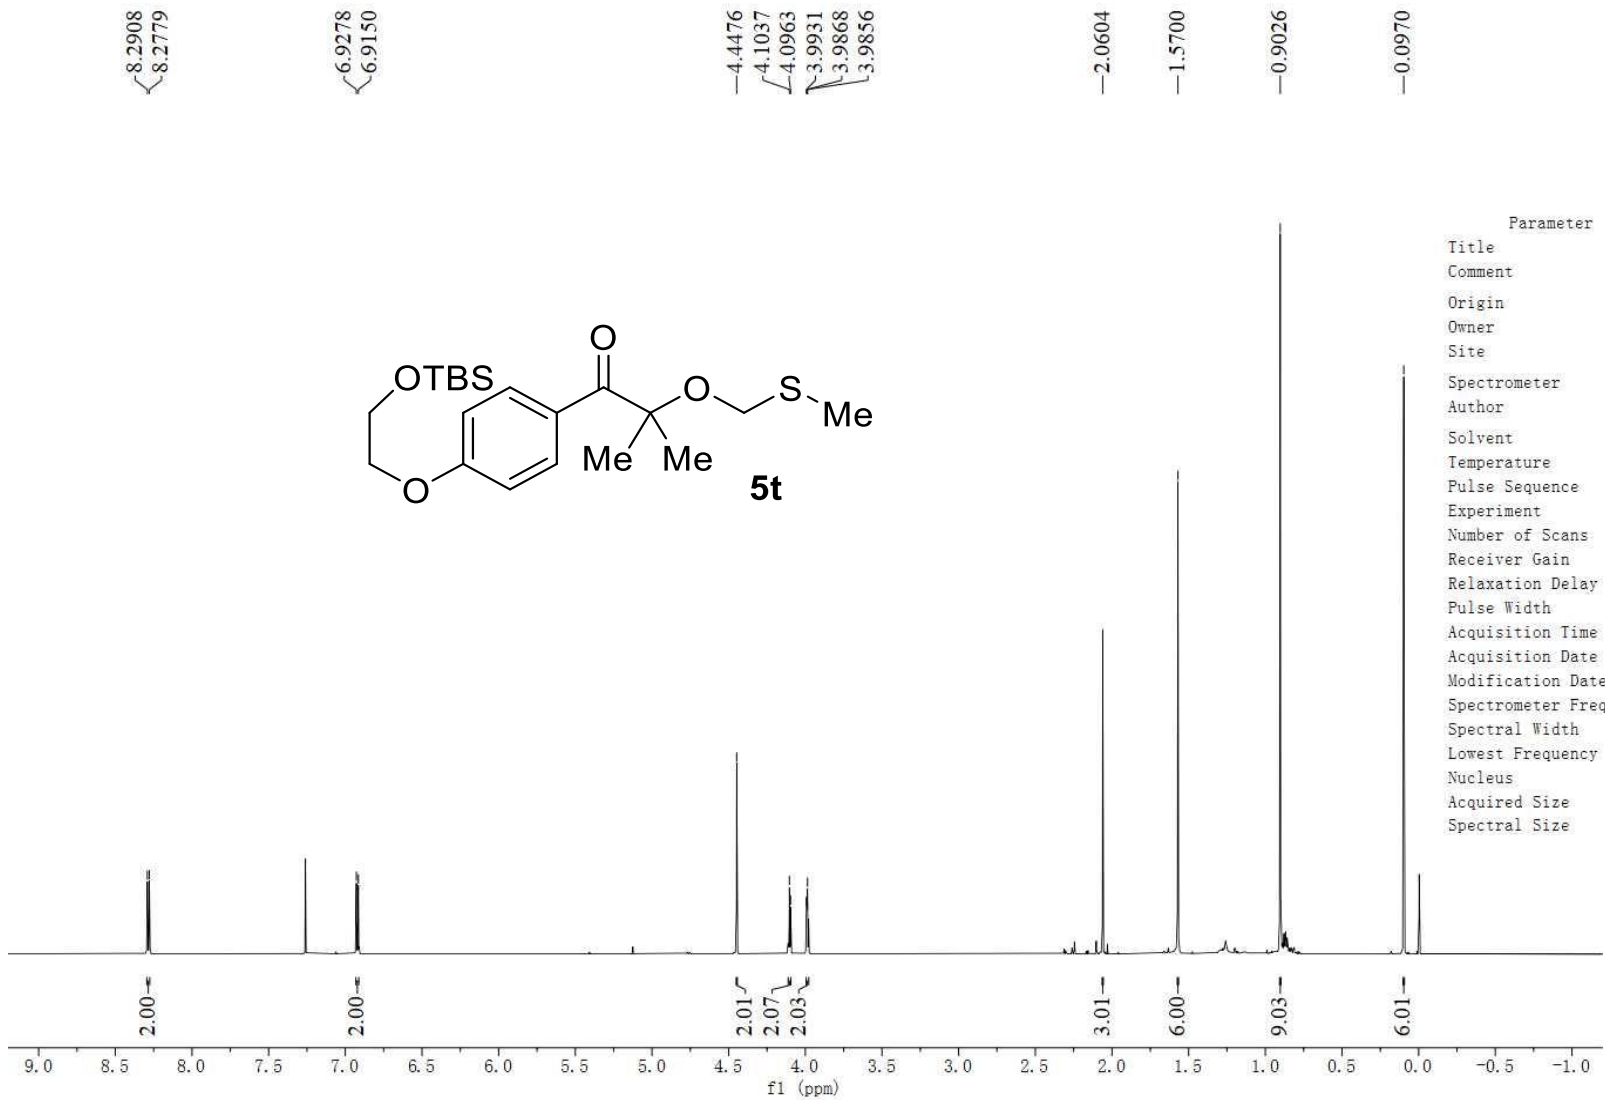

| Parameter              | Value               |
|------------------------|---------------------|
| Title                  | CR-B-101.1.fid      |
| Comment                |                     |
| Origin                 | Bruker BioSpin GmbH |
| Owner                  | nmrsu               |
| Site                   |                     |
| Spectrometer           | spect               |
| Author                 |                     |
| Solvent                | CDC13               |
| Temperature            | 298.0               |
| Pulse Sequence         | zg30                |
| Experiment             | 1D                  |
| Number of Scans        | 6                   |
| Receiver Gain          | 1                   |
| Relaxation Delay       | 1.0000              |
| Pulse Width            | 12.0000             |
| Acquisition Time       | 2.3243              |
| Acquisition Date       | 2021-10-16T07:39:51 |
| Modification Date      | 2021-10-16T07:39:54 |
| Spectrometer Frequency | 700.15              |
| Spectral Width         | 14097.7             |
| Lowest Frequency       | -2741.2             |
| Nucleus                | <sup>1</sup> H      |
| Acquired Size          | 32768               |
| Spectral Size          | 131072              |



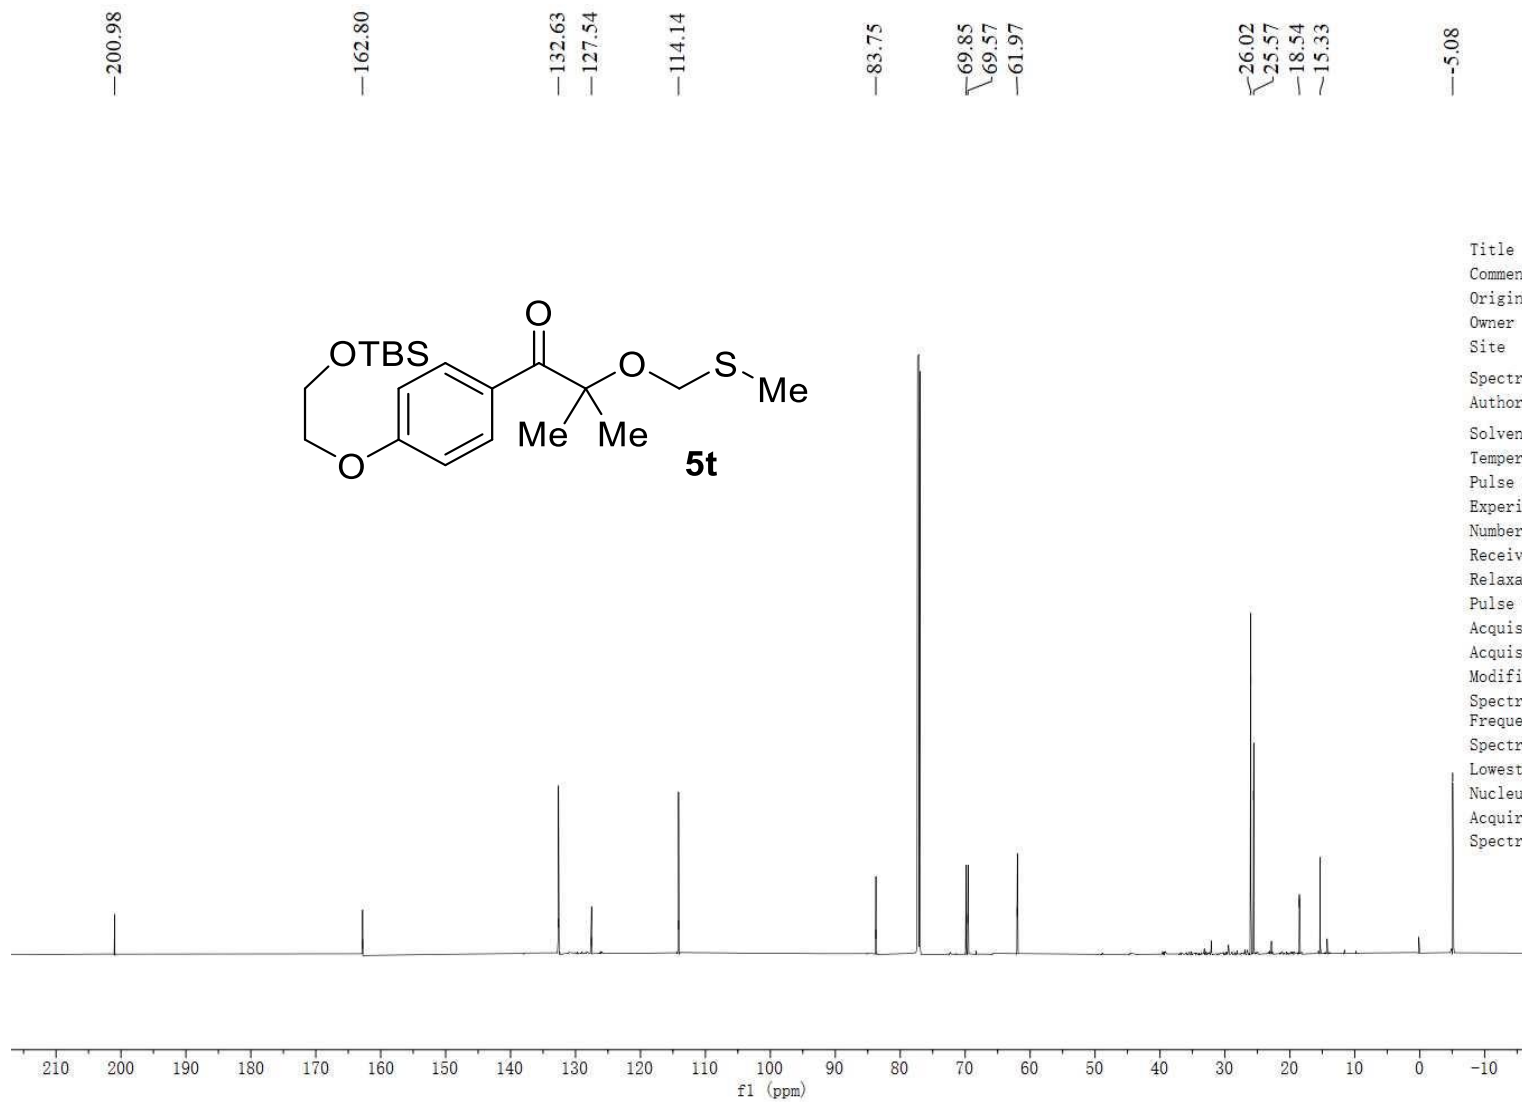

| Parameter         | Value               |
|-------------------|---------------------|
| Title             | CR-B-101.2.fid      |
| Comment           | 13C                 |
| Origin            | Bruker BioSpin GmbH |
| Owner             | nmrsu               |
| Site              |                     |
| Spectrometer      | spect               |
| Author            |                     |
| Solvent           | CDC13               |
| Temperature       | 298.0               |
| Pulse Sequence    | zgpg30              |
| Experiment        | 1D                  |
| Number of Scans   | 500                 |
| Receiver Gain     | 188                 |
| Relaxation Delay  | 2.0000              |
| Pulse Width       | 12.0000             |
| Acquisition Time  | 0.7690              |
| Acquisition Date  | 2021-10-16T08:03:47 |
| Modification Date | 2021-10-16T08:03:50 |
| Spectrometer      | 176.07              |
| Frequency         |                     |
| Spectral Width    | 42613.6             |
| Lowest Frequency  | -3678.4             |
| Nucleus           | 13C                 |
| Acquired Size     | 32768               |
| Spectral Size     | 65536               |

7.1551  
7.1522  
7.1423  
7.1394  
6.9470  
6.9384  
6.9342  
6.9256  
6.8759  
6.8734  
6.8709  
6.8674  
6.8649

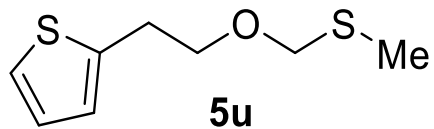

4.6637

3.7985  
3.7819  
3.7654  
3.1443  
3.1260  
3.1097

2.1210

| Parameter              | Value               |
|------------------------|---------------------|
| Title                  | CR-B-92             |
| Comment                |                     |
| Origin                 | Bruker BioSpin GmbH |
| Owner                  | narsu               |
| Site                   |                     |
| Spectrometer           | spect               |
| Author                 |                     |
| Solvent                | CDCl3               |
| Temperature            | 298.0               |
| Pulse Sequence         | zg30                |
| Experiment             | 1D                  |
| Number of Scans        | 16                  |
| Receiver Gain          | 31                  |
| Relaxation Delay       | 1.0000              |
| Pulse Width            | 9.7800              |
| Acquisition Time       | 4.0894              |
| Acquisition Date       | 2021-09-24T23:12:15 |
| Modification Date      | 2021-09-24T23:12:16 |
| Spectrometer Frequency | 400.15              |
| Spectral Width         | 8012.8              |
| Lowest Frequency       | -1545.8             |
| Nucleus                | 1H                  |
| Acquired Size          | 32768               |
| Spectral Size          | 65536               |

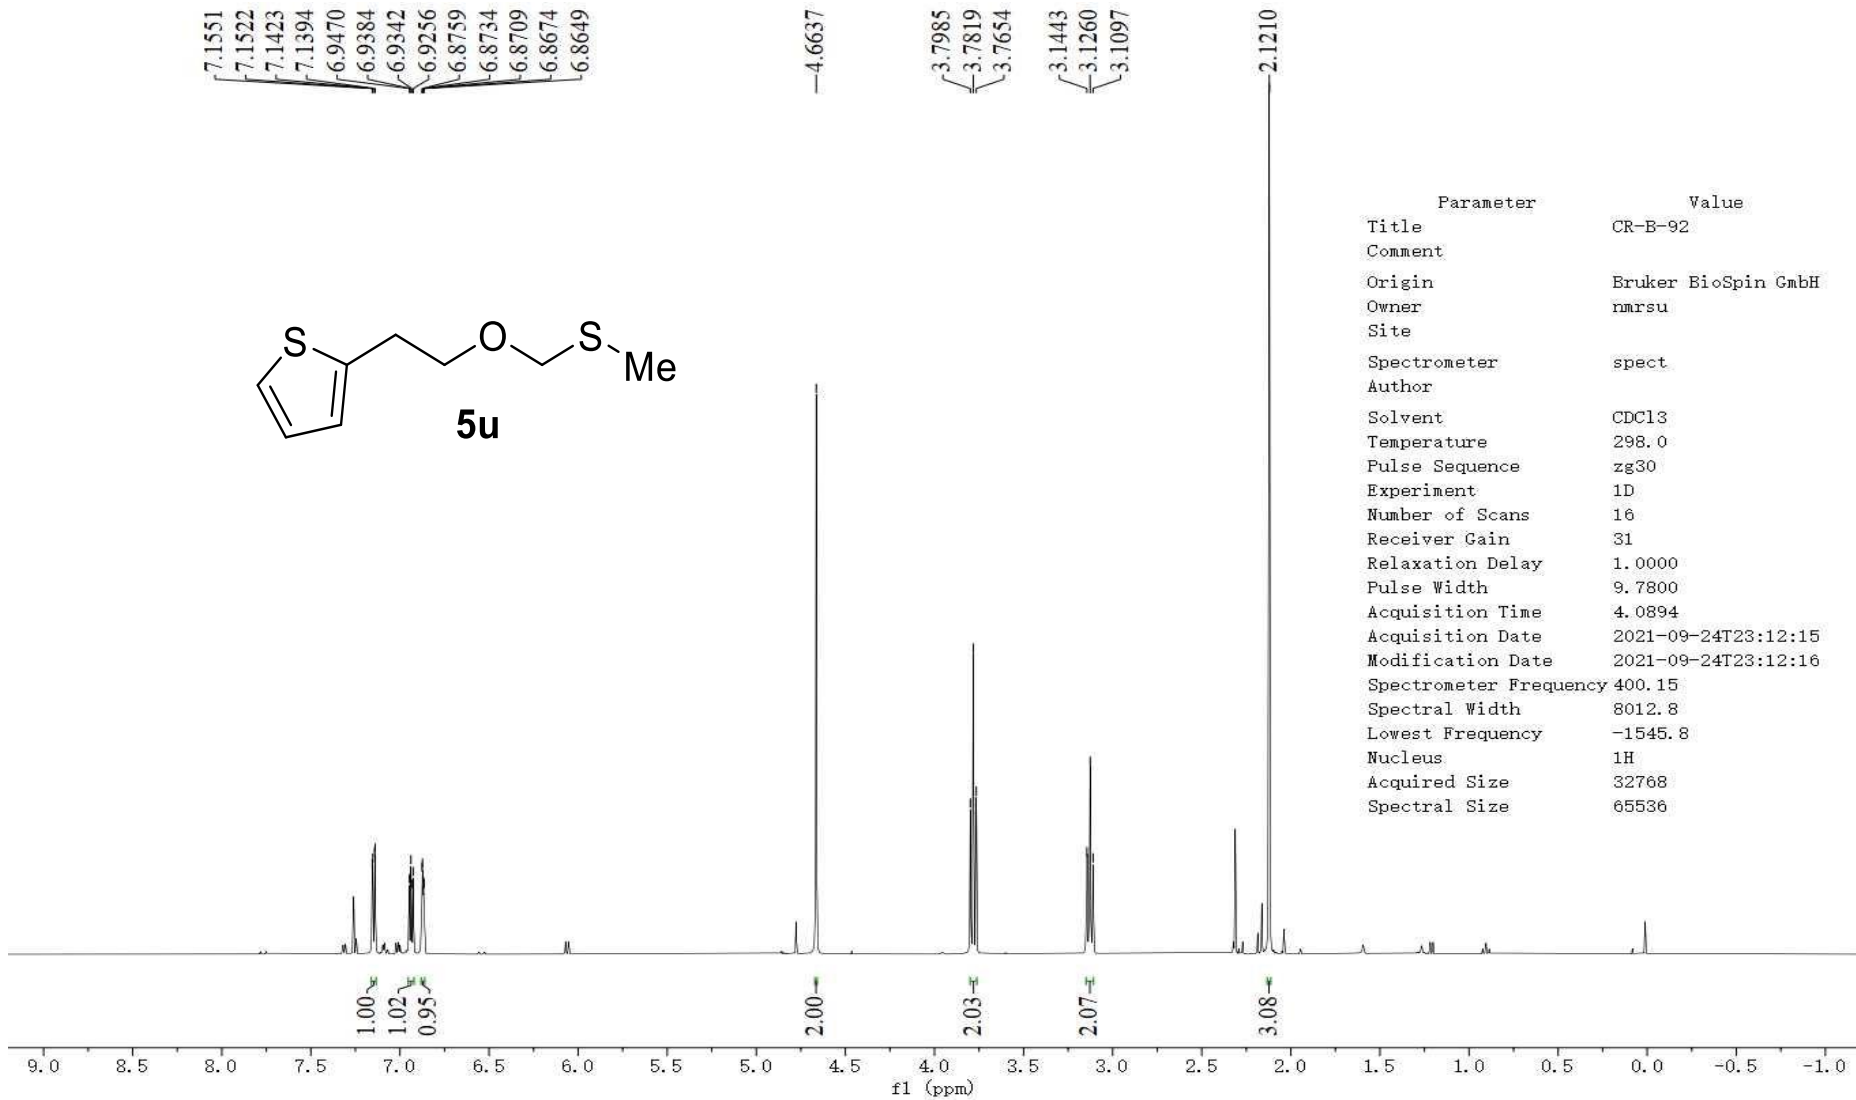

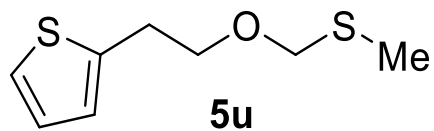

—141.31

—126.80

—125.28

—123.79

—75.39

—68.63

—30.30

—14.06

| Parameter        | Value               |
|------------------|---------------------|
| Title            | CR-B-92             |
| Comment          |                     |
| Origin           | Bruker BioSpin GmbH |
| Owner            | nmsu                |
| Site             |                     |
| Spectrometer     | spect               |
| Author           |                     |
| Solvent          | CDCl <sub>3</sub>   |
| Temperature      | 298.0               |
| Pulse Sequence   | zgpg30              |
| Experiment       | 1D                  |
| Number of Scans  | 600                 |
| Receiver Gain    | 202                 |
| Relaxation Delay | 2.0000              |
| Pulse Width      | 10.5800             |
| Acquisition Time | 1.3631              |
| Acquisition Date | 2021-09-24T23:47:36 |
| Modification     | 2021-09-24T23:47:38 |
| Date             |                     |
| Spectrometer     | 100.62              |
| Frequency        |                     |
| Spectral Width   | 24038.5             |
| Lowest Frequency | -1949.4             |
| Nucleus          | 13C                 |
| Acquired Size    | 32768               |

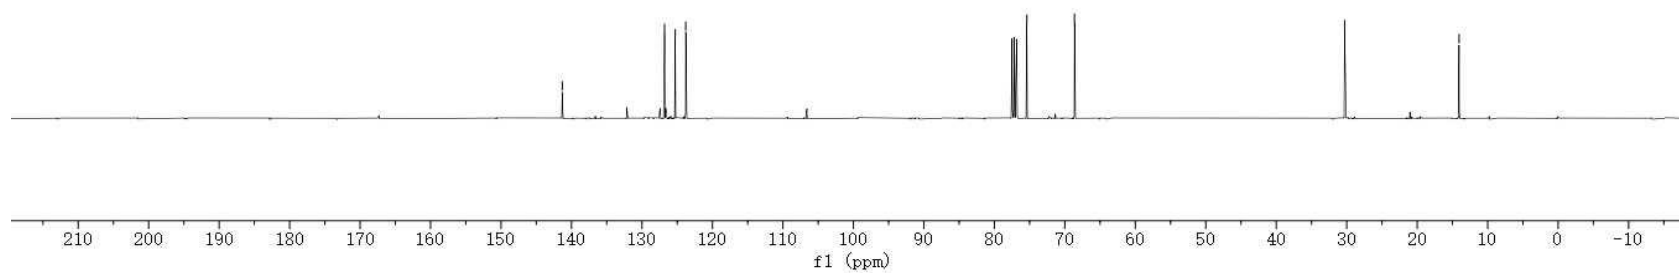

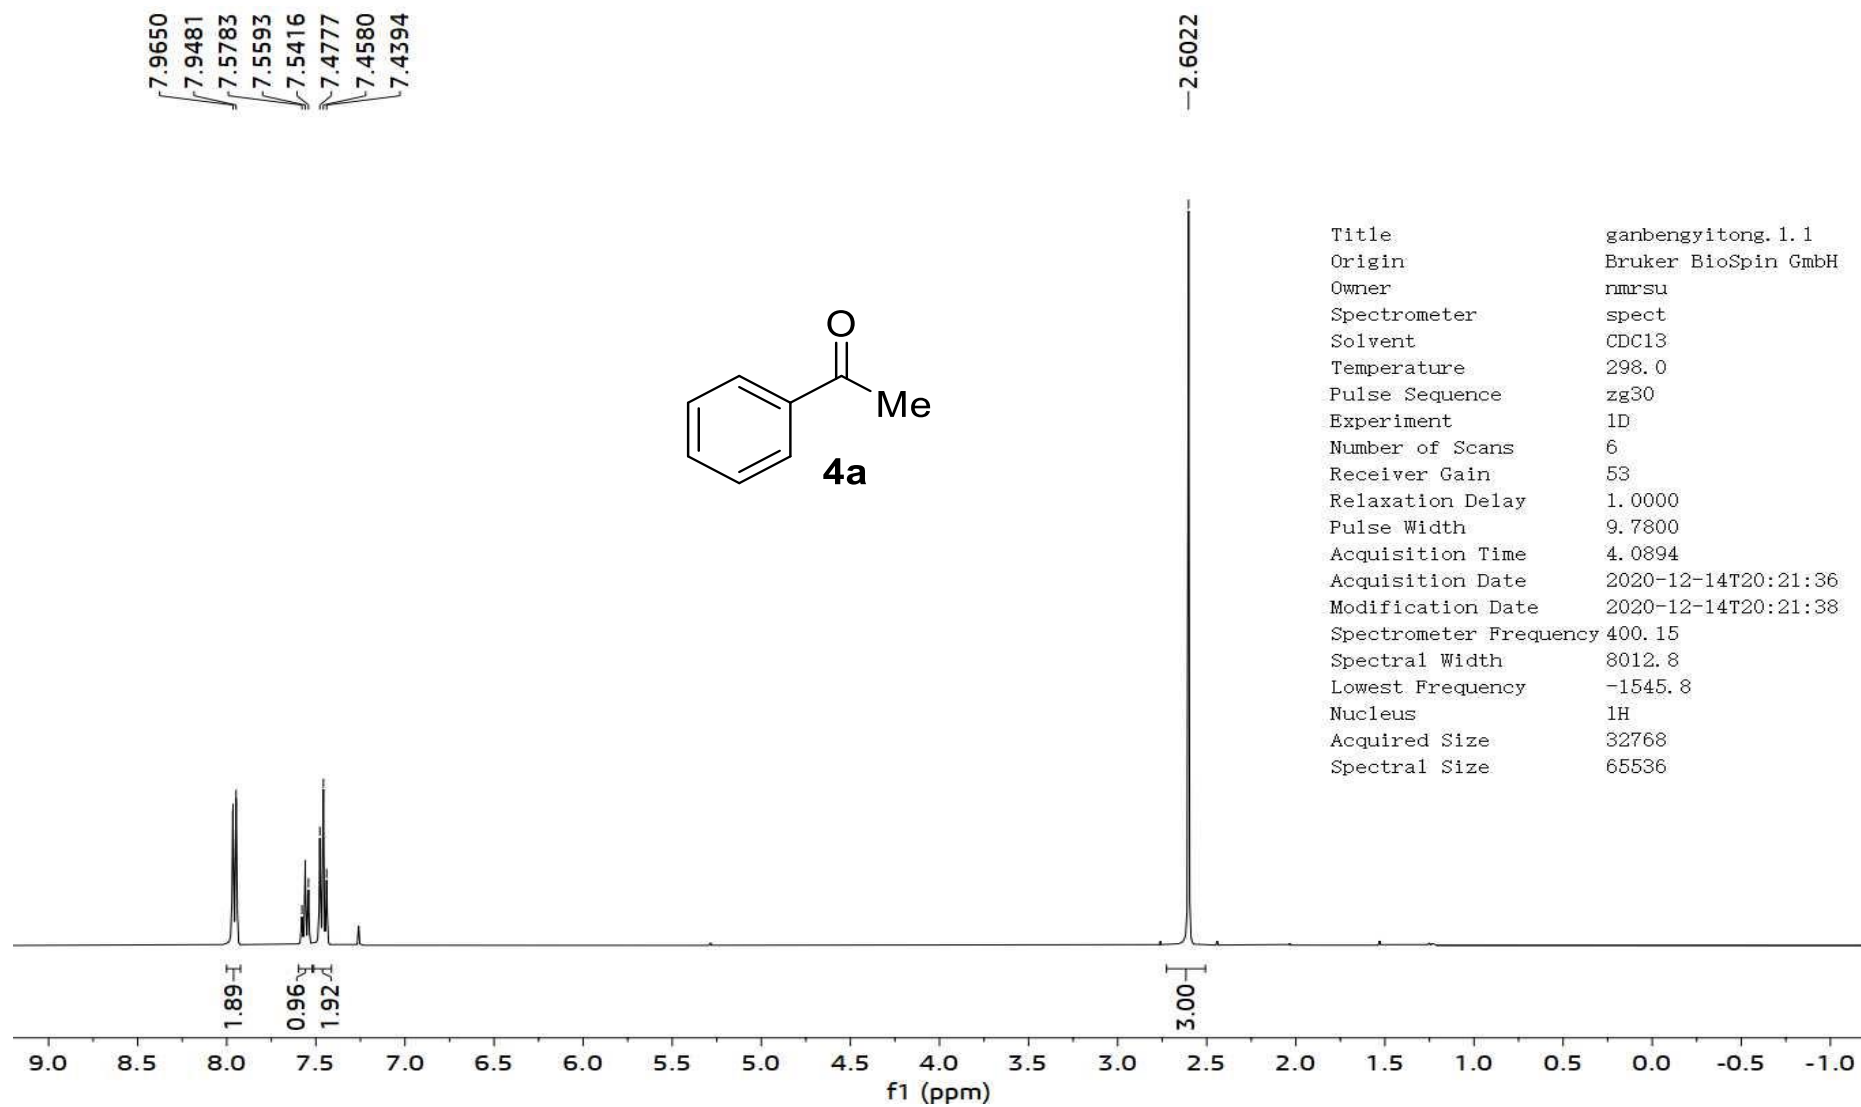

—198.26

✓ 137.25  
✓ 133.21  
✓ 128.68  
✓ 128.42

—26.72

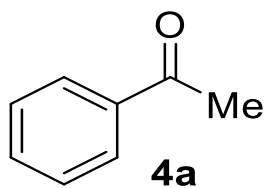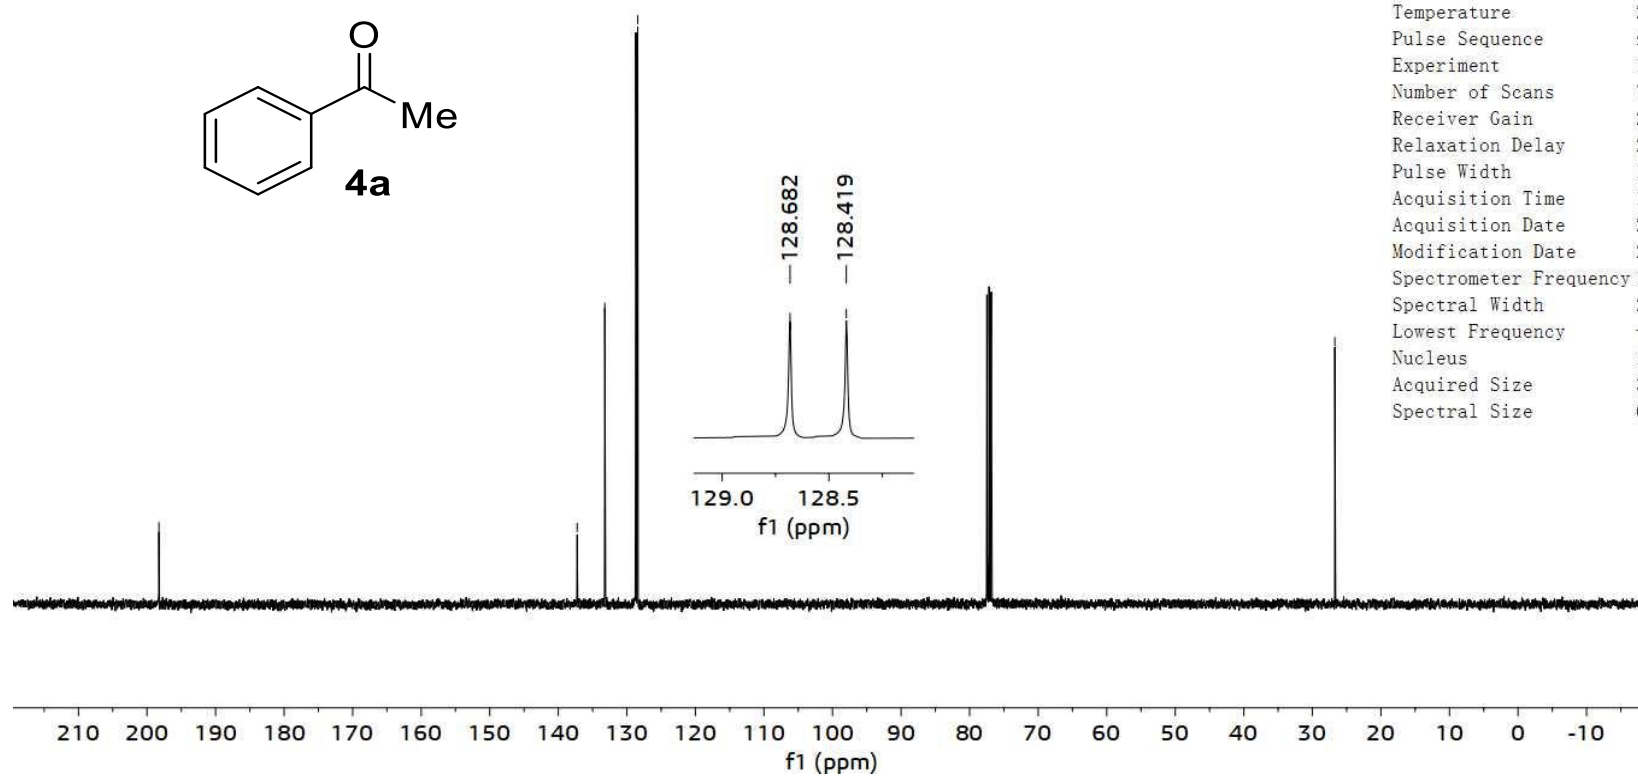

|                        |                     |
|------------------------|---------------------|
| Title                  | ganbengyitong.2.1   |
| Origin                 | Bruker BioSpin GmbH |
| Owner                  | nmrsu               |
| Spectrometer           | spect               |
| Solvent                | CDCl3               |
| Temperature            | 298.0               |
| Pulse Sequence         | zgpg30              |
| Experiment             | 1D                  |
| Number of Scans        | 70                  |
| Receiver Gain          | 202                 |
| Relaxation Delay       | 2.0000              |
| Pulse Width            | 10.5800             |
| Acquisition Time       | 1.3631              |
| Acquisition Date       | 2020-12-14T20:26:42 |
| Modification Date      | 2020-12-14T20:26:44 |
| Spectrometer Frequency | 100.62              |
| Spectral Width         | 24038.5             |
| Lowest Frequency       | -1947.7             |
| Nucleus                | 13C                 |
| Acquired Size          | 32768               |
| Spectral Size          | 65536               |

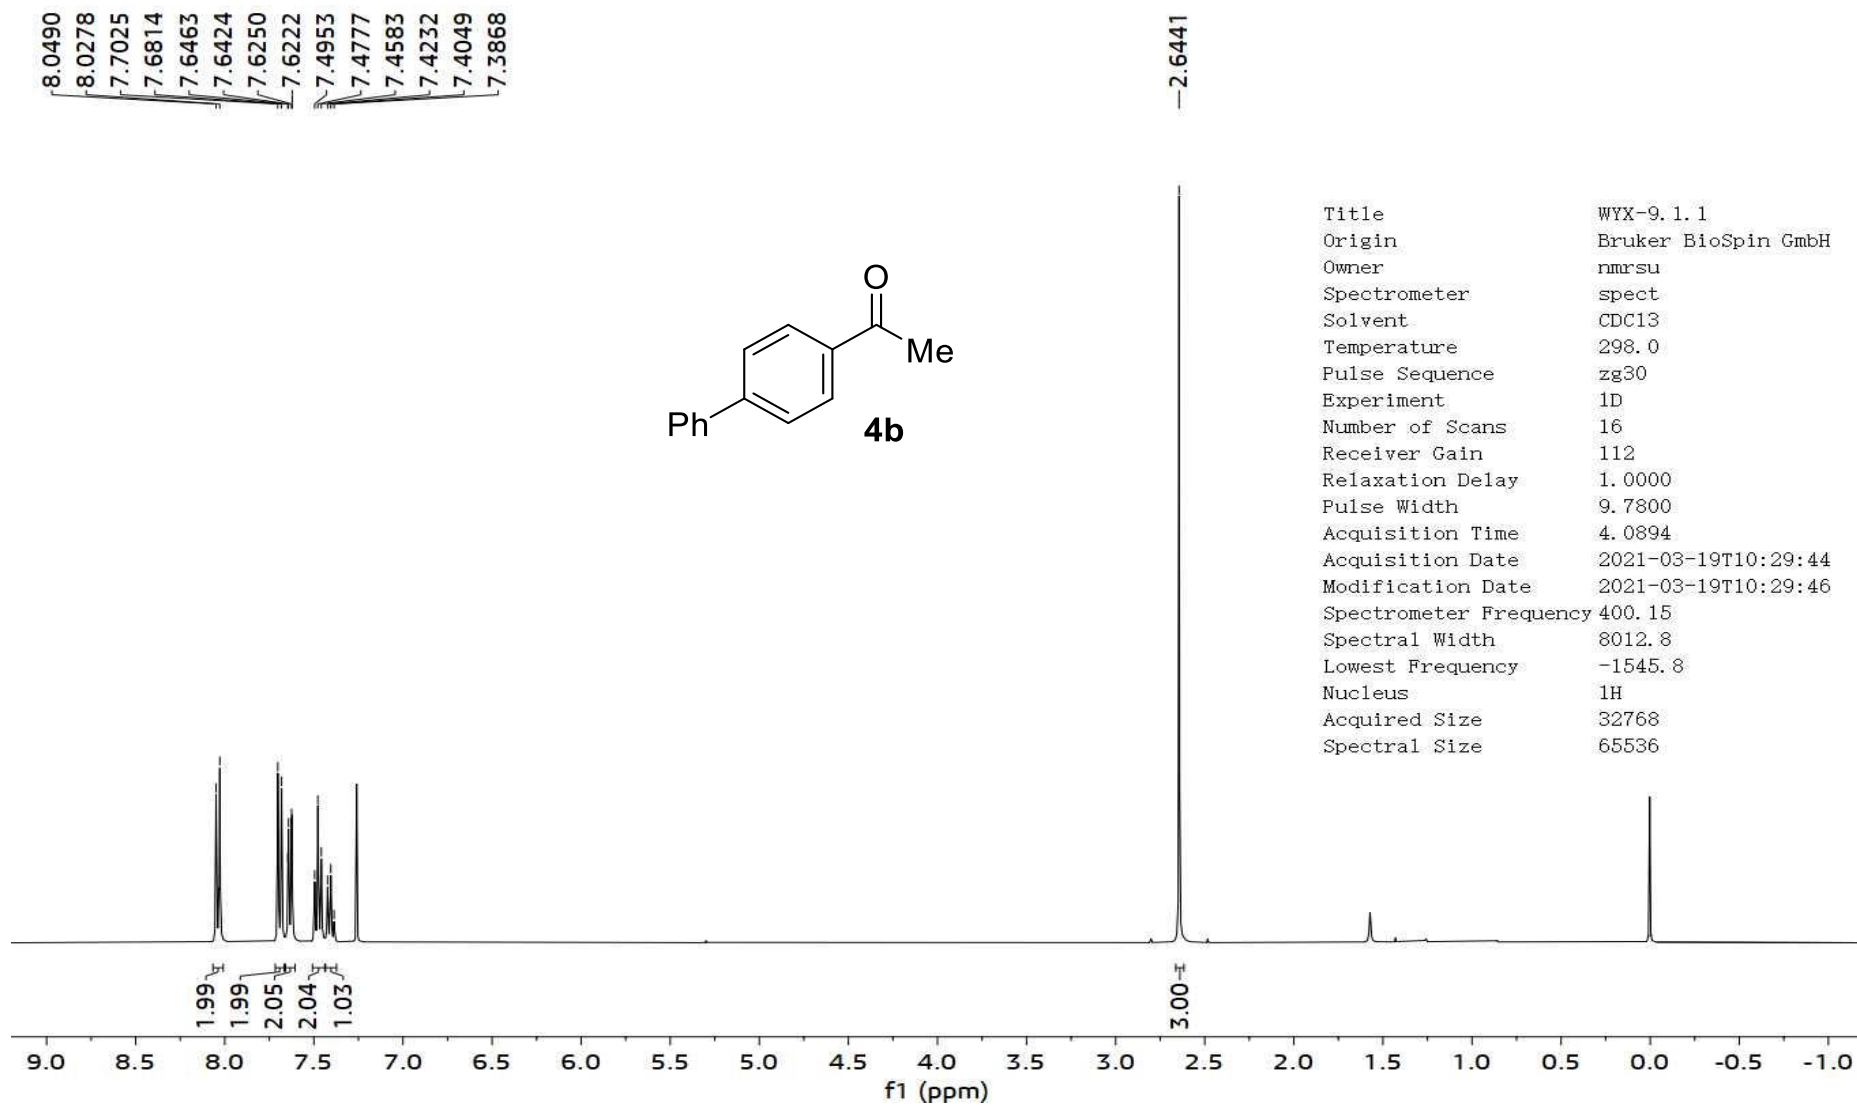

—197.90

145.94  
140.04  
136.02  
129.10  
129.06  
128.38  
127.42  
127.38

—26.82

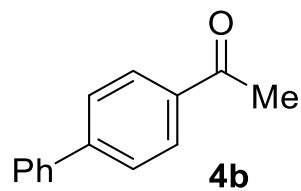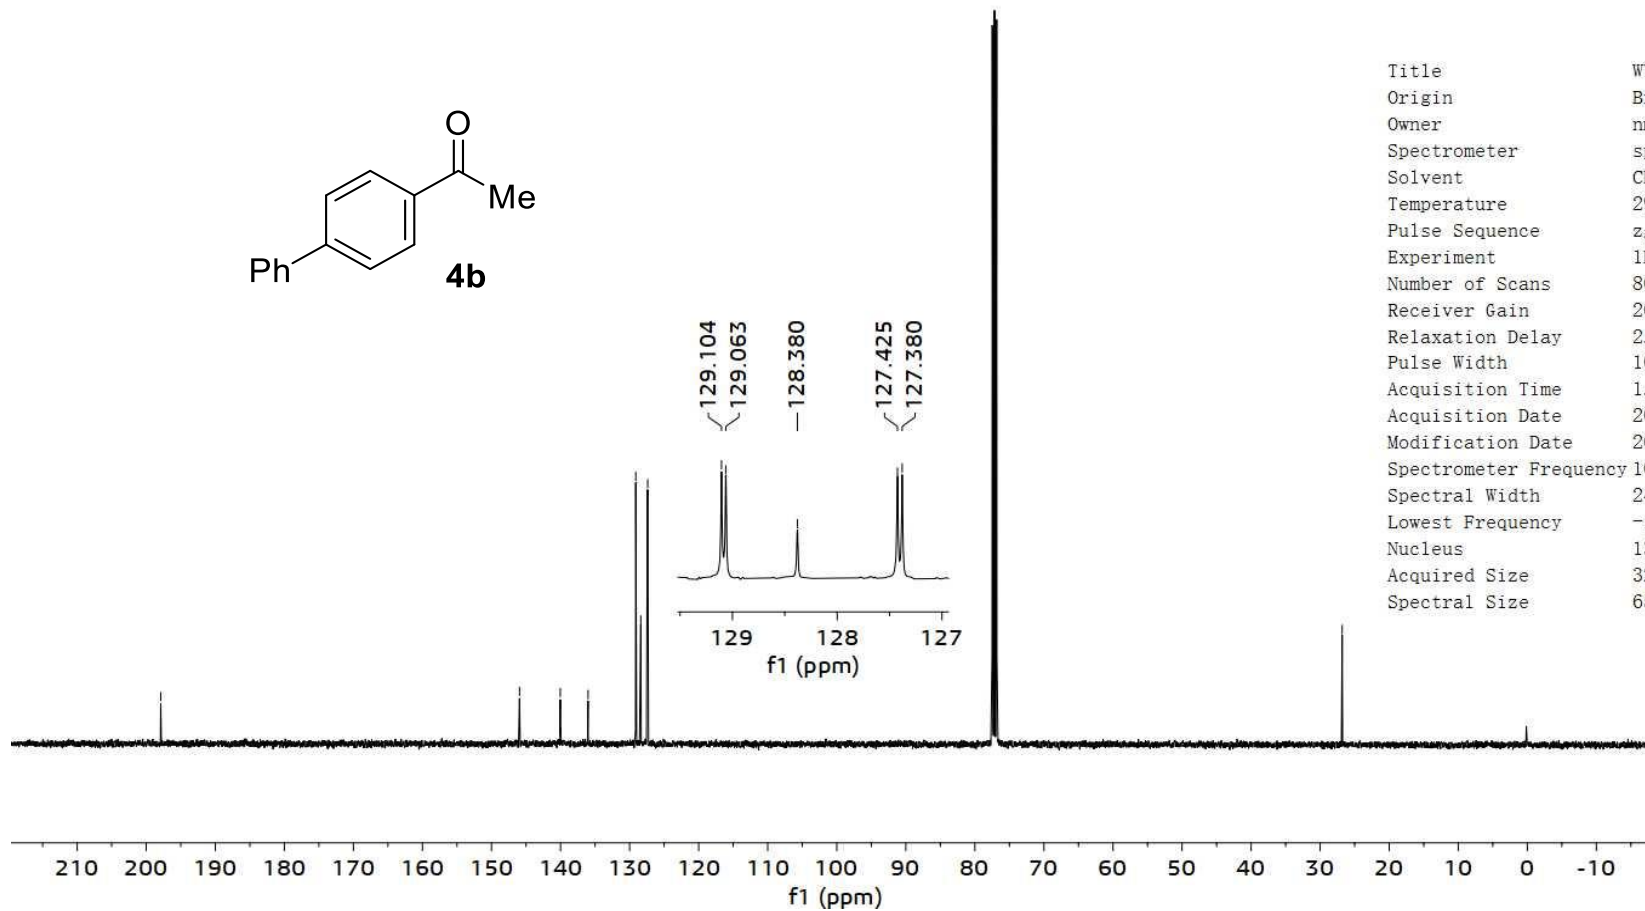

|                        |                     |
|------------------------|---------------------|
| Title                  | WYX-9. 2. 1         |
| Origin                 | Bruker BioSpin GmbH |
| Owner                  | nmr-su              |
| Spectrometer           | spect               |
| Solvent                | CDC13               |
| Temperature            | 298.0               |
| Pulse Sequence         | zgpg30              |
| Experiment             | 1D                  |
| Number of Scans        | 800                 |
| Receiver Gain          | 202                 |
| Relaxation Delay       | 2.0000              |
| Pulse Width            | 10.5800             |
| Acquisition Time       | 1.3631              |
| Acquisition Date       | 2021-03-19T14:00:01 |
| Modification Date      | 2021-03-19T14:00:04 |
| Spectrometer Frequency | 100.62              |
| Spectral Width         | 24038.5             |
| Lowest Frequency       | -1943.3             |
| Nucleus                | 13C                 |
| Acquired Size          | 32768               |
| Spectral Size          | 65536               |

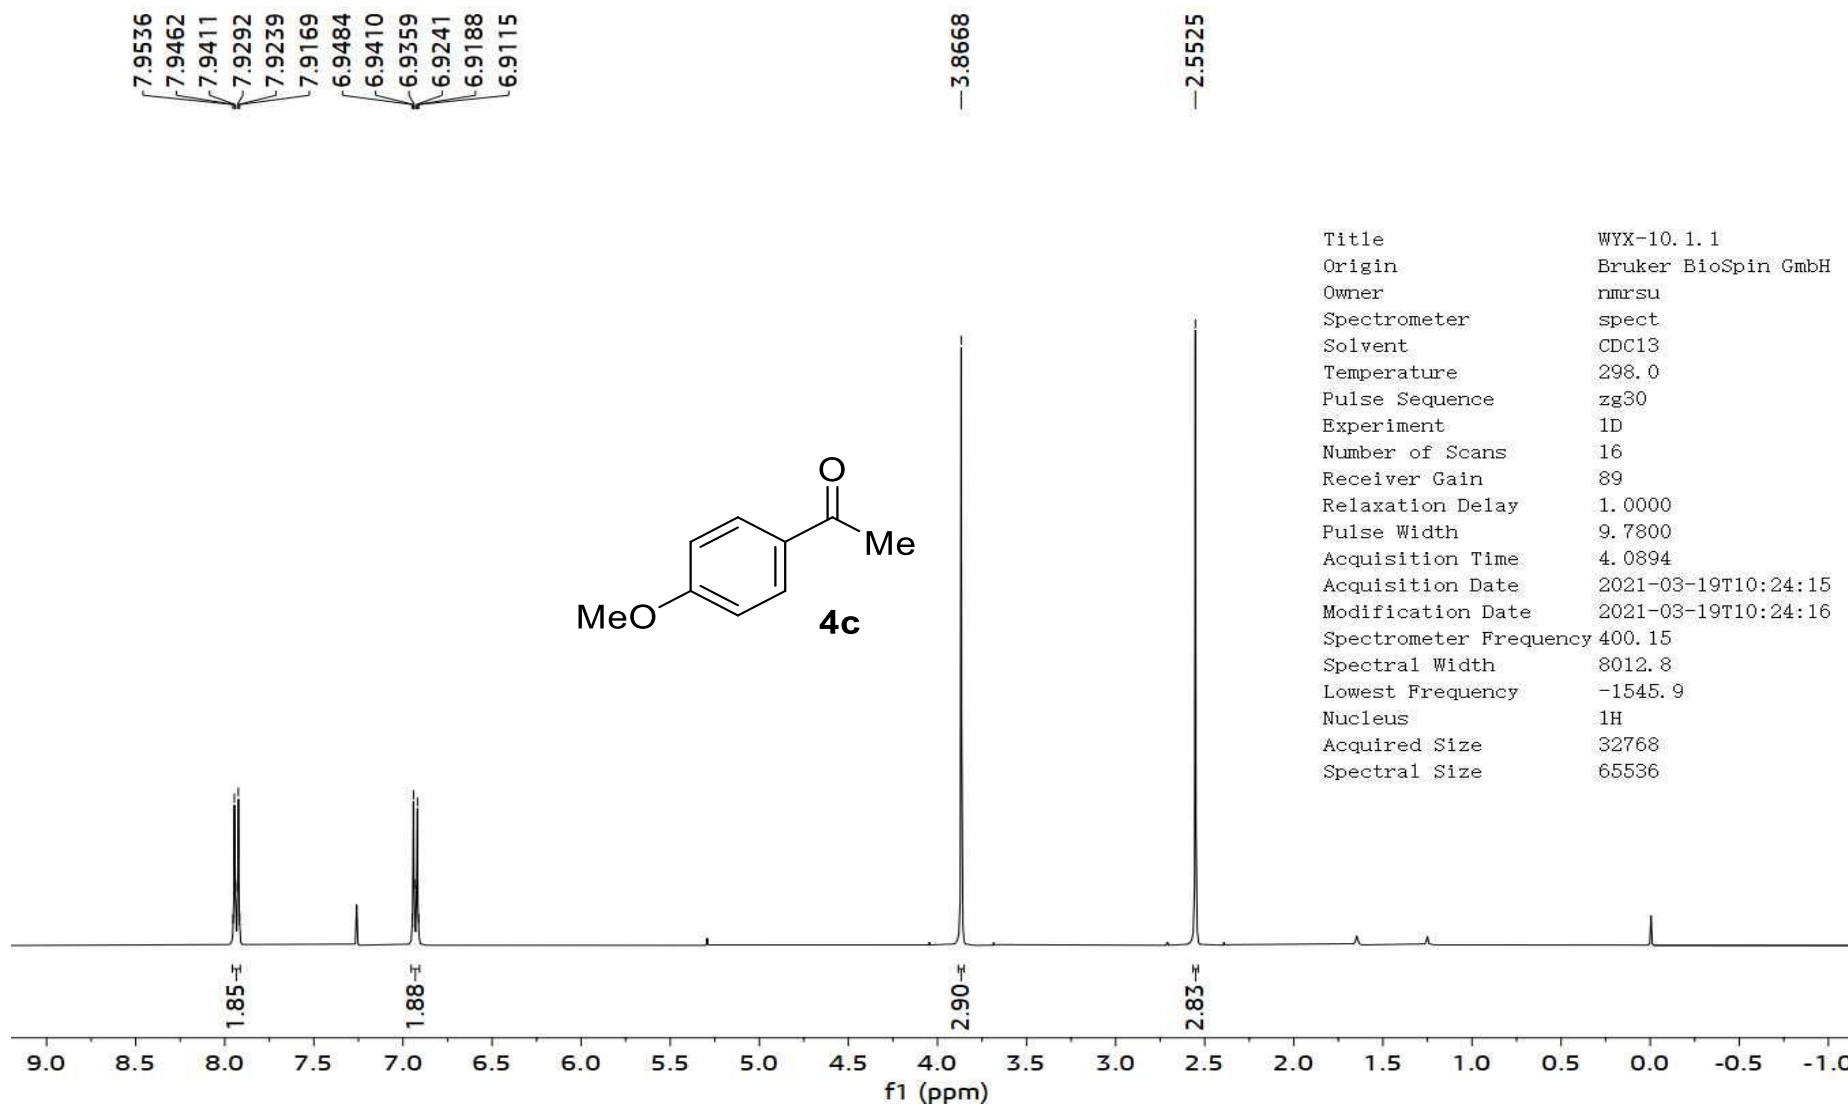



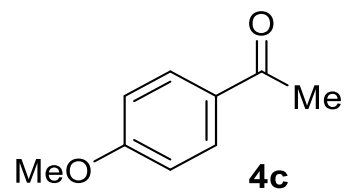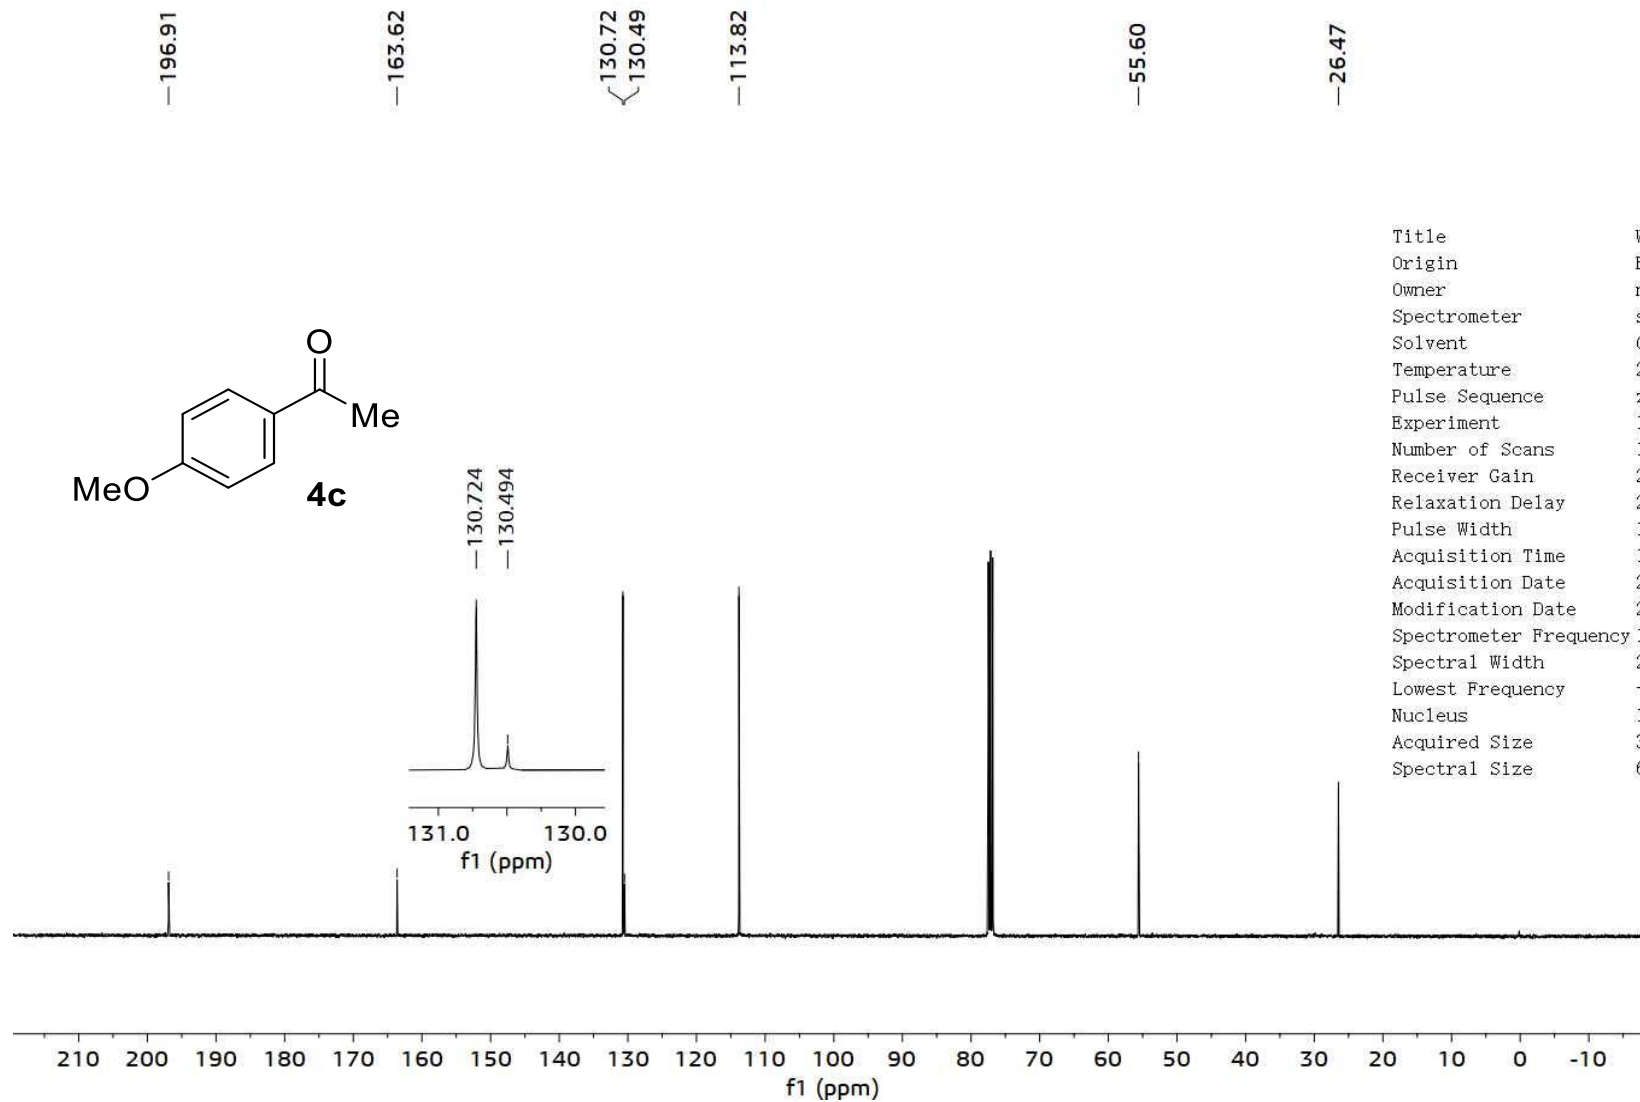

|                        |                     |
|------------------------|---------------------|
| Title                  | WYX-10.2.1          |
| Origin                 | Bruker BioSpin GmbH |
| Owner                  | nmrsu               |
| Spectrometer           | spect               |
| Solvent                | CDC13               |
| Temperature            | 298.0               |
| Pulse Sequence         | zgpg30              |
| Experiment             | 1D                  |
| Number of Scans        | 1024                |
| Receiver Gain          | 202                 |
| Relaxation Delay       | 2.0000              |
| Pulse Width            | 10.5800             |
| Acquisition Time       | 1.3631              |
| Acquisition Date       | 2021-03-19T13:09:55 |
| Modification Date      | 2021-03-19T13:09:56 |
| Spectrometer Frequency | 100.62              |
| Spectral Width         | 24038.5             |
| Lowest Frequency       | -1945.1             |
| Nucleus                | 13C                 |
| Acquired Size          | 32768               |
| Spectral Size          | 65536               |

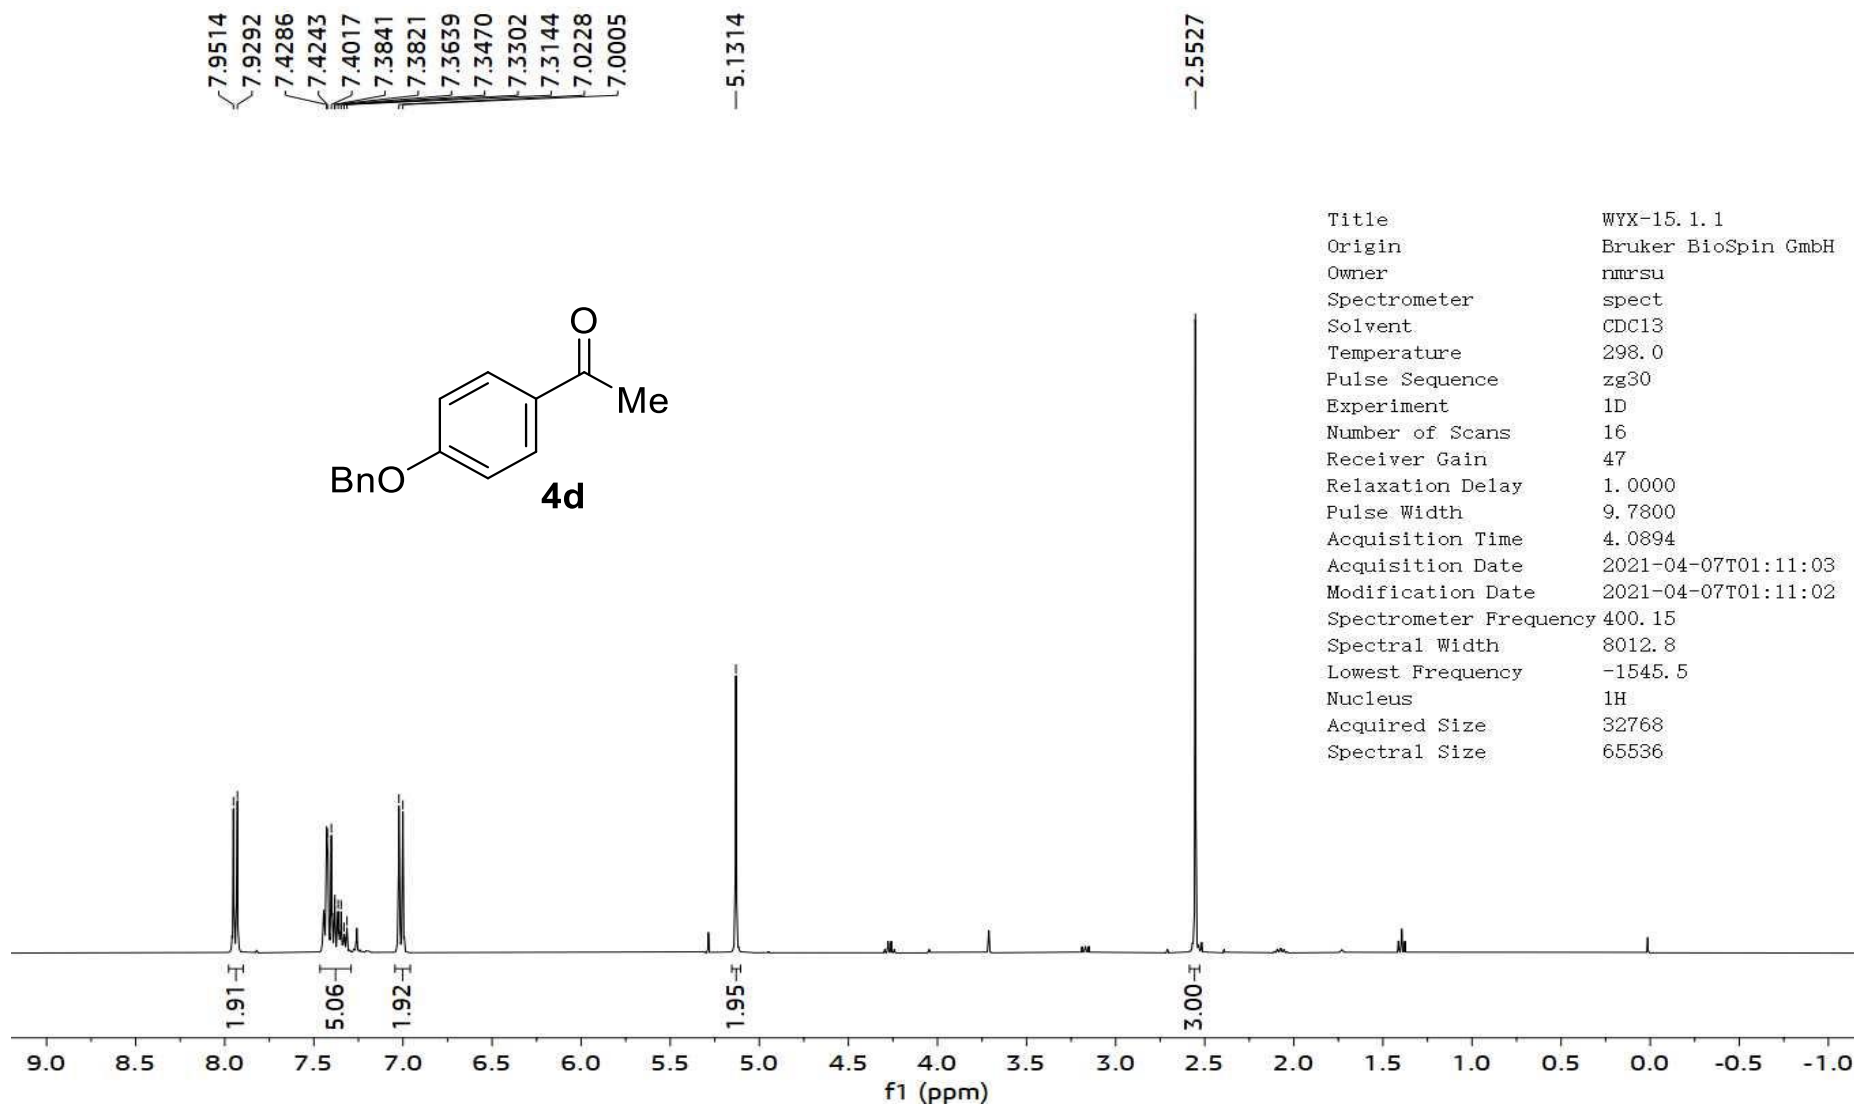

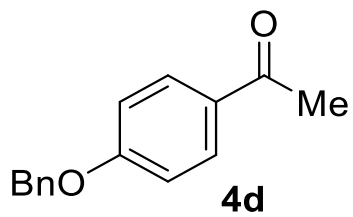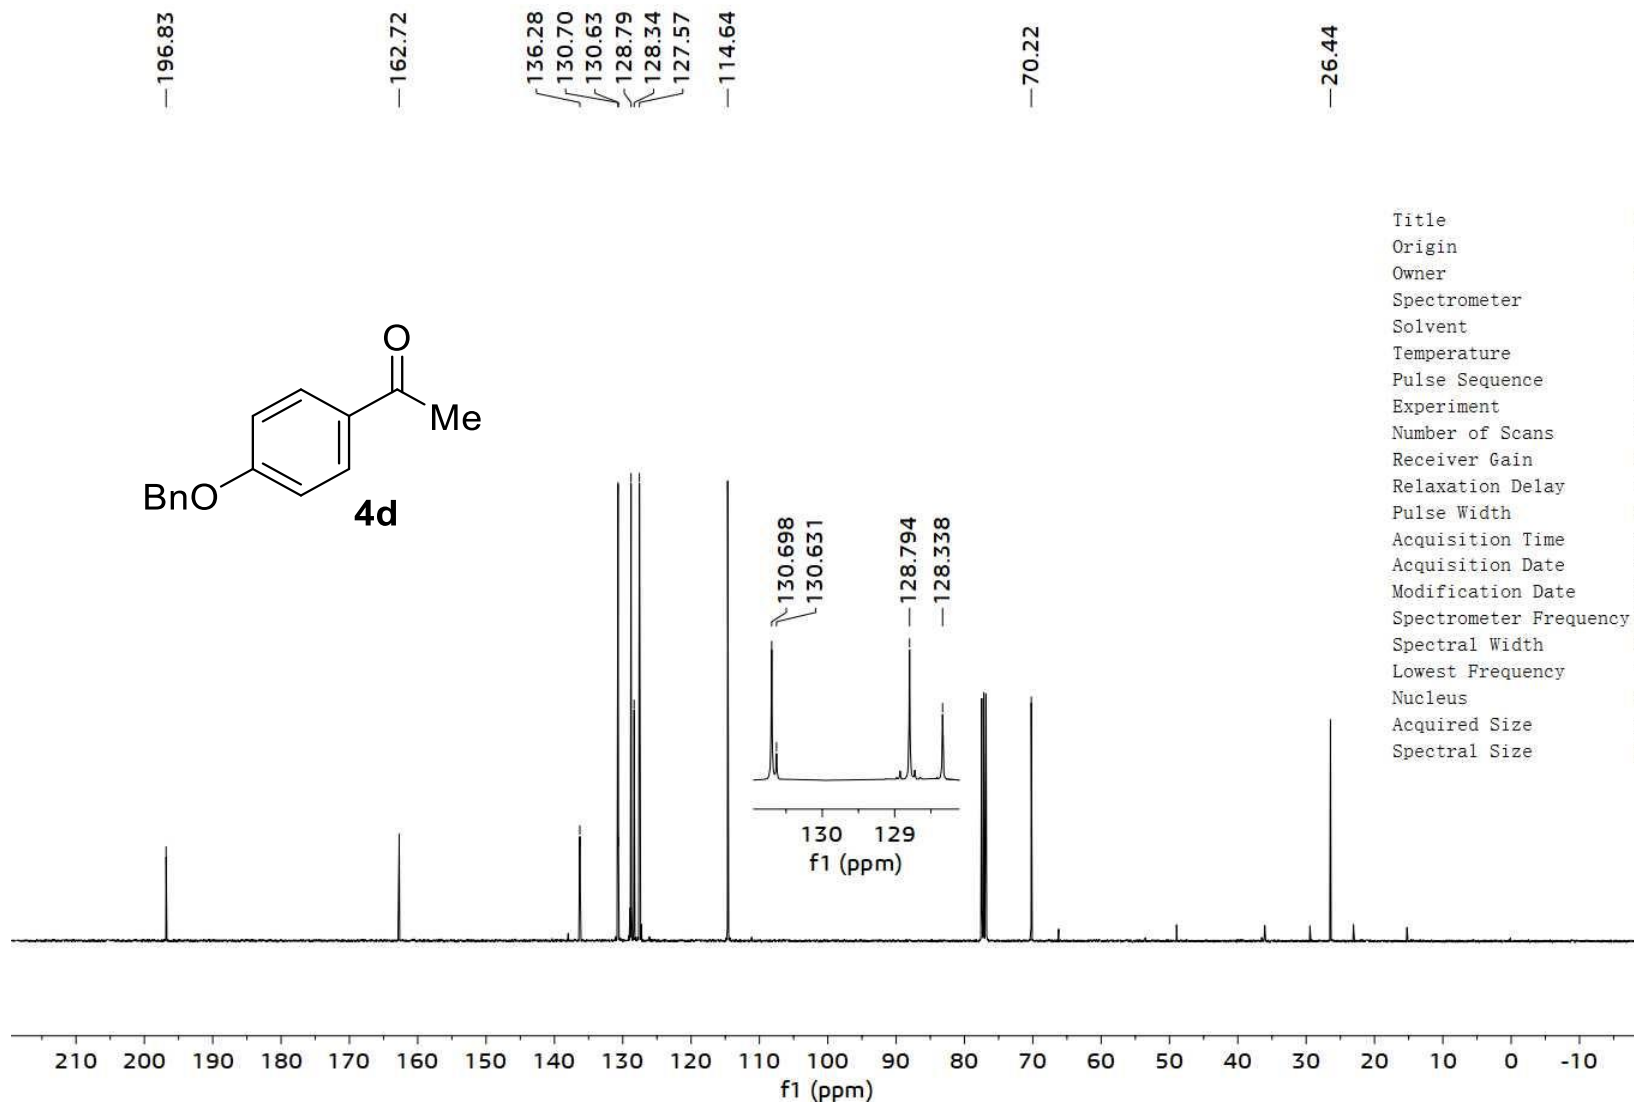

|                        |                     |
|------------------------|---------------------|
| Title                  | WYX-15.2.1          |
| Origin                 | Bruker BioSpin GmbH |
| Owner                  | nmr-su              |
| Spectrometer           | spect               |
| Solvent                | CDCl <sub>3</sub>   |
| Temperature            | 298.0               |
| Pulse Sequence         | zgpg30              |
| Experiment             | 1D                  |
| Number of Scans        | 1024                |
| Receiver Gain          | 202                 |
| Relaxation Delay       | 2.0000              |
| Pulse Width            | 10.5800             |
| Acquisition Time       | 1.3631              |
| Acquisition Date       | 2021-04-07T02:10:42 |
| Modification Date      | 2021-04-07T02:10:42 |
| Spectrometer Frequency | 100.62              |
| Spectral Width         | 24038.5             |
| Lowest Frequency       | -1950.6             |
| Nucleus                | <sup>13</sup> C     |
| Acquired Size          | 32768               |
| Spectral Size          | 65536               |

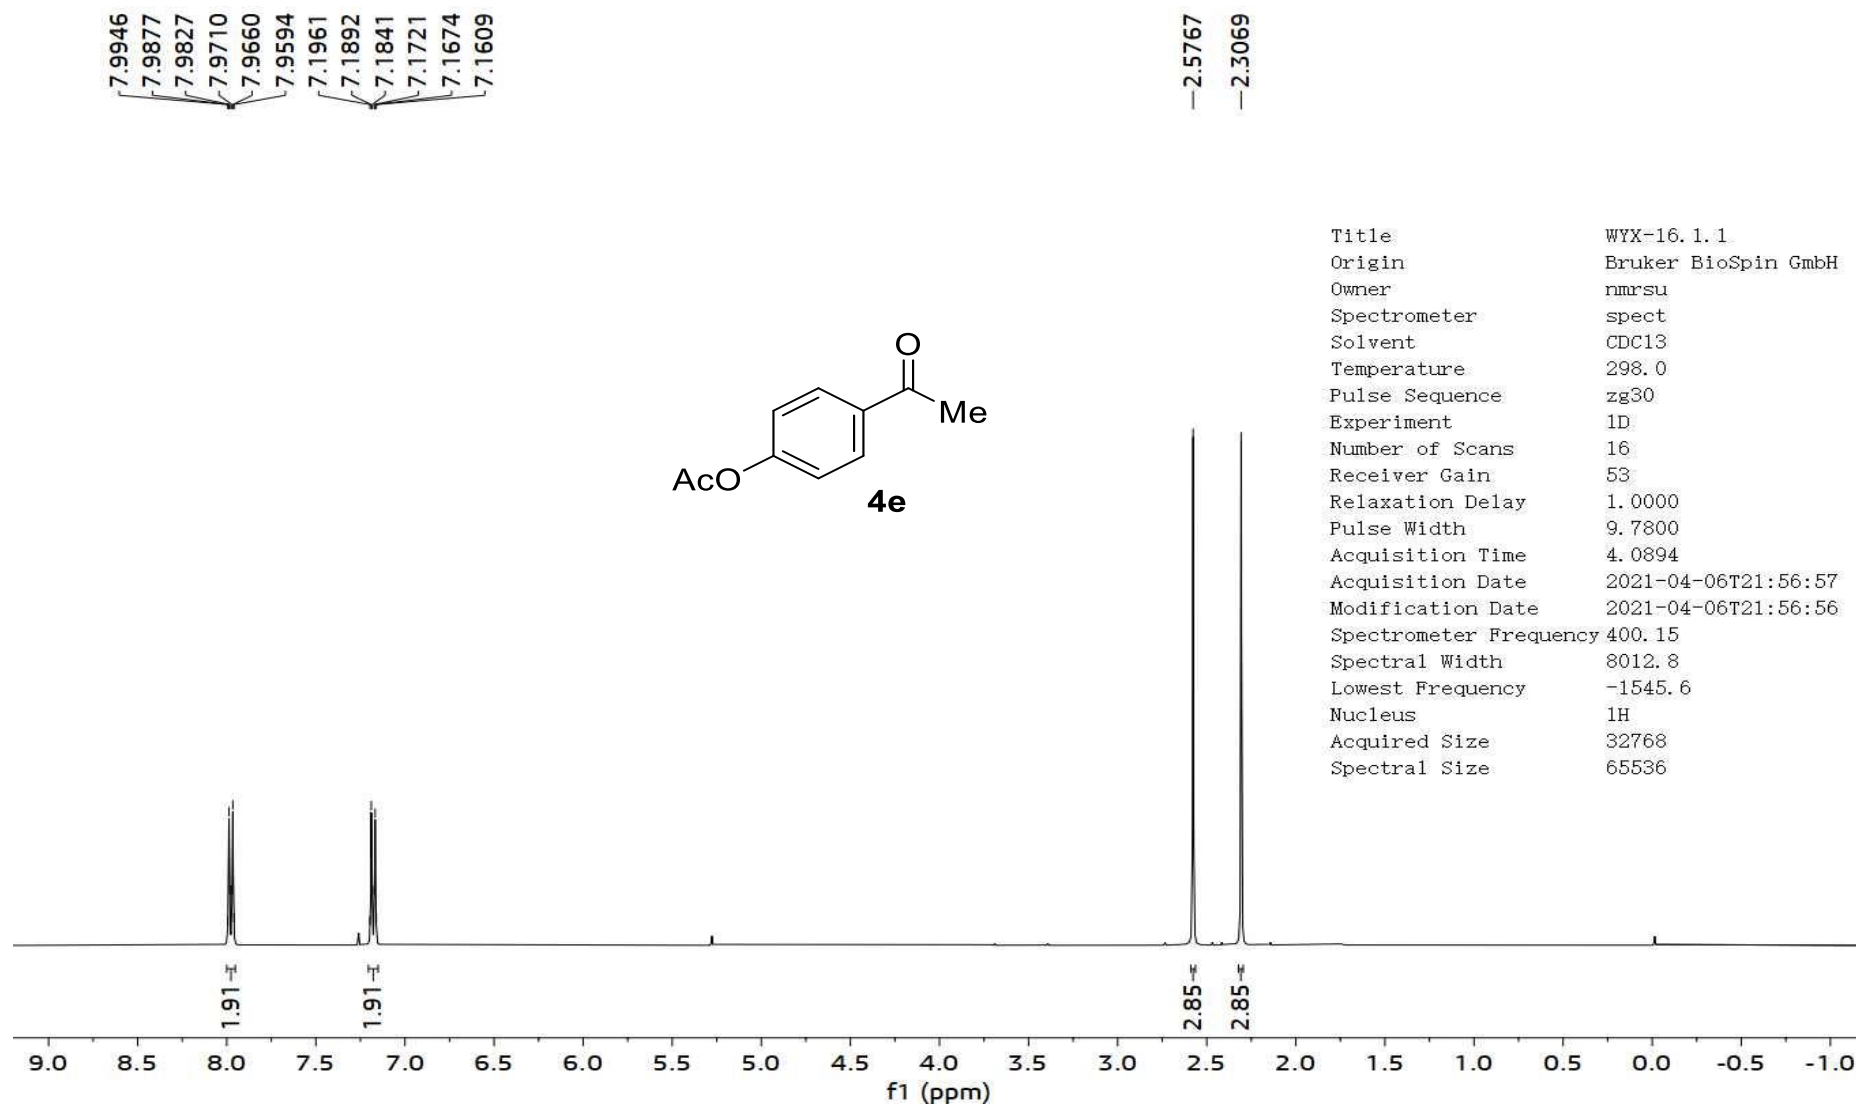

—196.90

—168.92

—154.43

^134.81

^130.02

^121.85

—26.66

—21.21

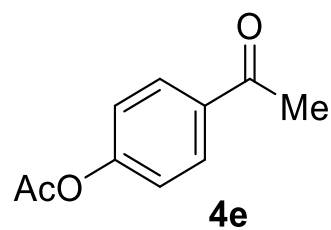

|                        |                     |
|------------------------|---------------------|
| Title                  | WYX-16.2.1          |
| Origin                 | Bruker BioSpin GmbH |
| Owner                  | nmrsu               |
| Spectrometer           | spect               |
| Solvent                | CDCl3               |
| Temperature            | 298.0               |
| Pulse Sequence         | zgpg30              |
| Experiment             | 1D                  |
| Number of Scans        | 1024                |
| Receiver Gain          | 202                 |
| Relaxation Delay       | 2.0000              |
| Pulse Width            | 10.5800             |
| Acquisition Time       | 1.3631              |
| Acquisition Date       | 2021-04-06T22:56:31 |
| Modification Date      | 2021-04-06T22:56:30 |
| Spectrometer Frequency | 100.62              |
| Spectral Width         | 24038.5             |
| Lowest Frequency       | -1950.2             |
| Nucleus                | 13C                 |
| Acquired Size          | 32768               |
| Spectral Size          | 65536               |

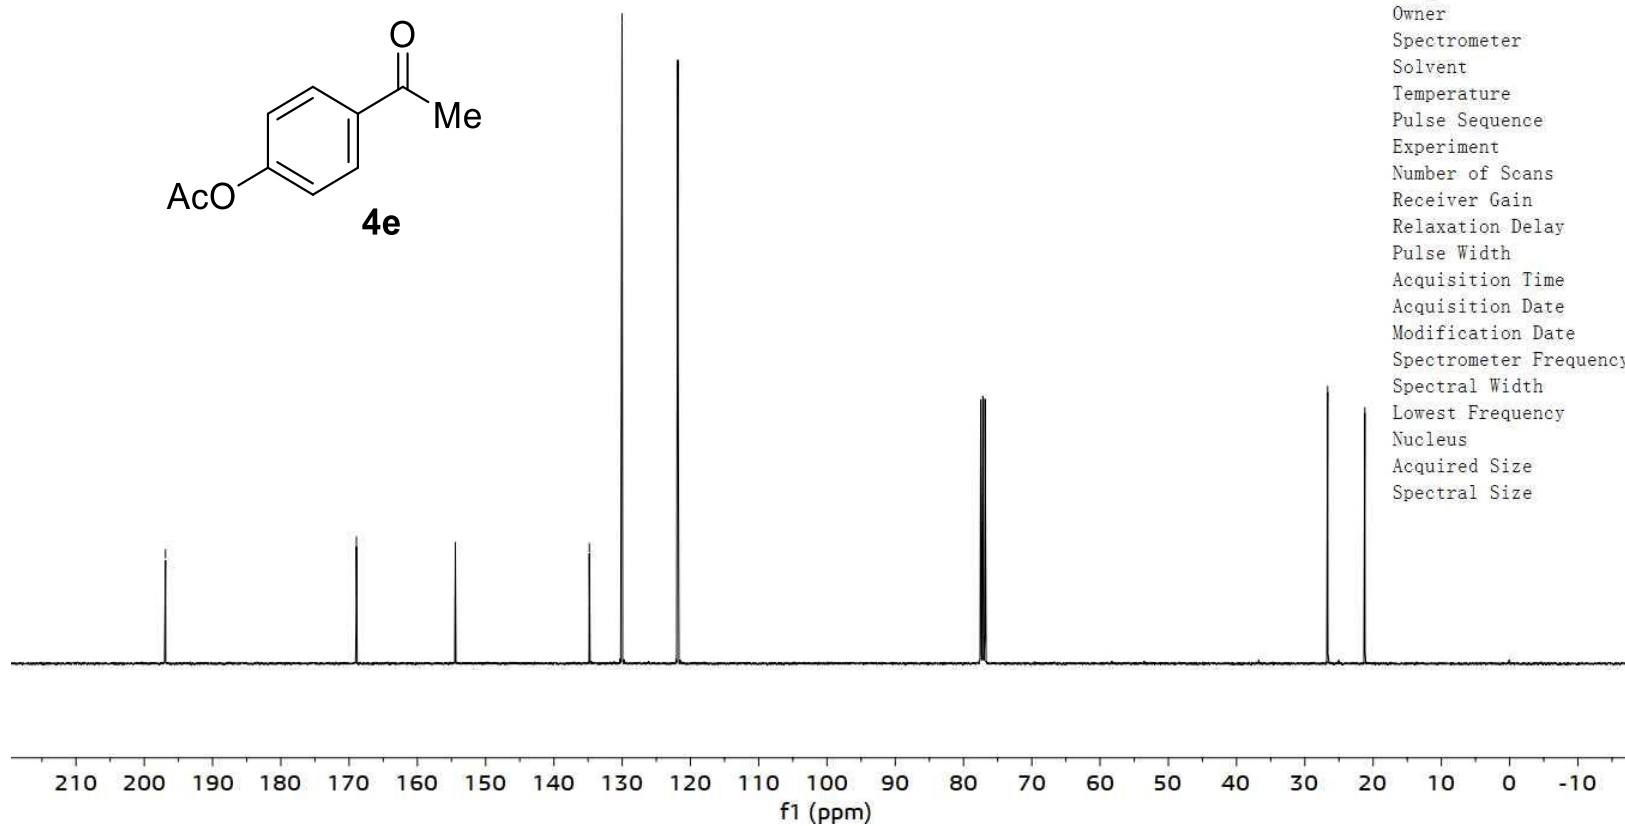

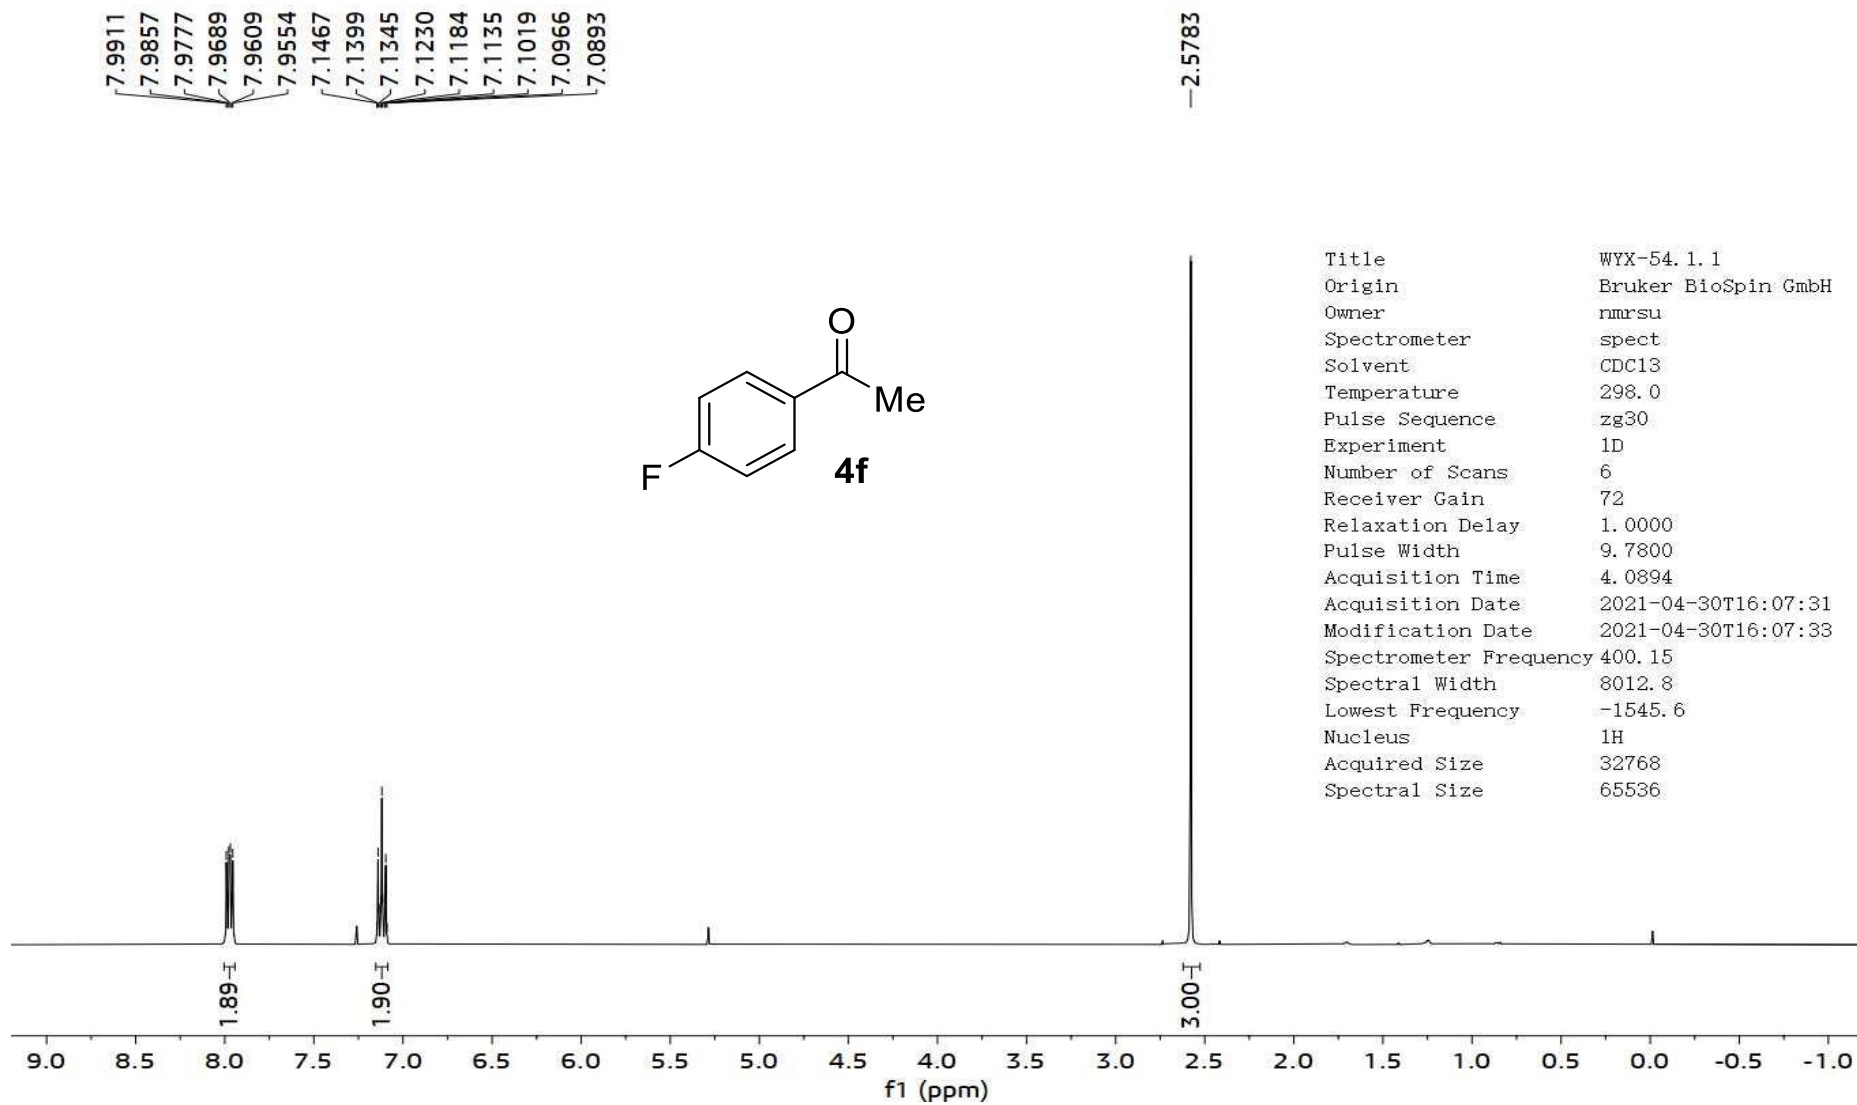

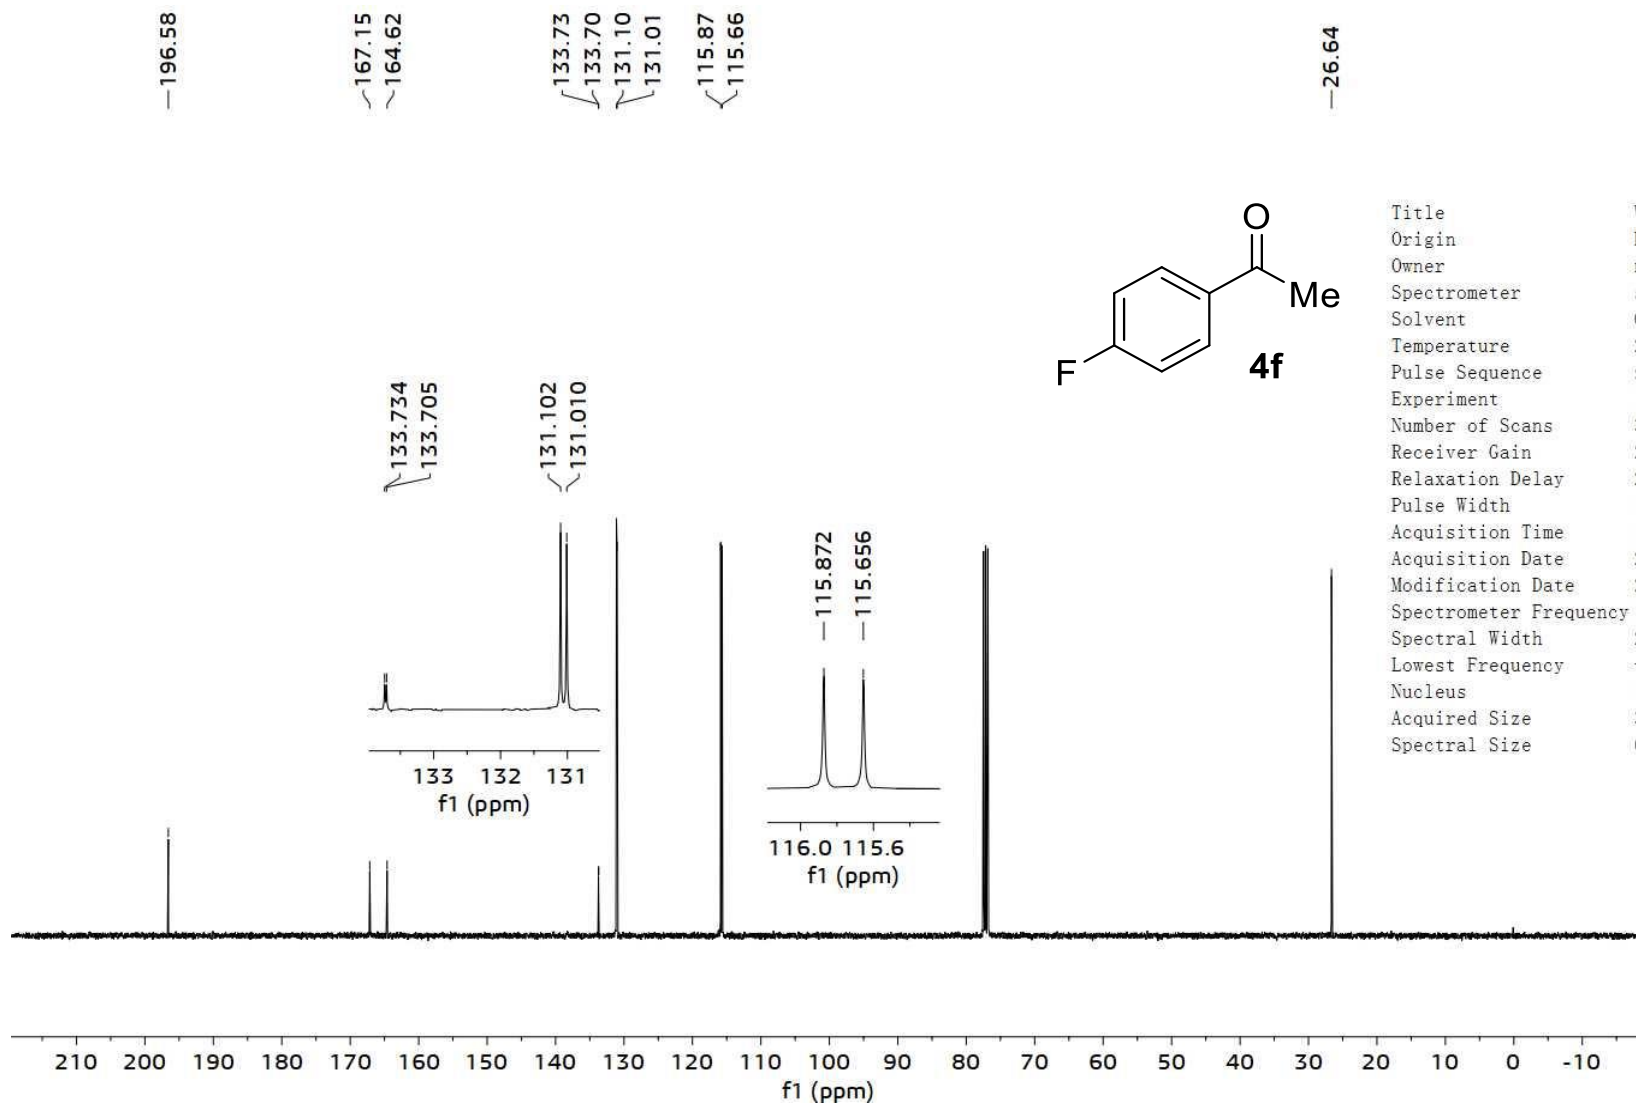

|                        |                     |
|------------------------|---------------------|
| Title                  | WYX-54.2.1          |
| Origin                 | Bruker BioSpin GmbH |
| Owner                  | nmrsu               |
| Spectrometer           | spect               |
| Solvent                | CDCl3               |
| Temperature            | 298.0               |
| Pulse Sequence         | zgpg30              |
| Experiment             | 1D                  |
| Number of Scans        | 350                 |
| Receiver Gain          | 202                 |
| Relaxation Delay       | 2.0000              |
| Pulse Width            | 10.5800             |
| Acquisition Time       | 1.3631              |
| Acquisition Date       | 2021-04-30T16:28:38 |
| Modification Date      | 2021-04-30T16:28:41 |
| Spectrometer Frequency | 100.62              |
| Spectral Width         | 24038.5             |
| Lowest Frequency       | -1946.2             |
| Nucleus                | 13C                 |
| Acquired Size          | 32768               |
| Spectral Size          | 65536               |

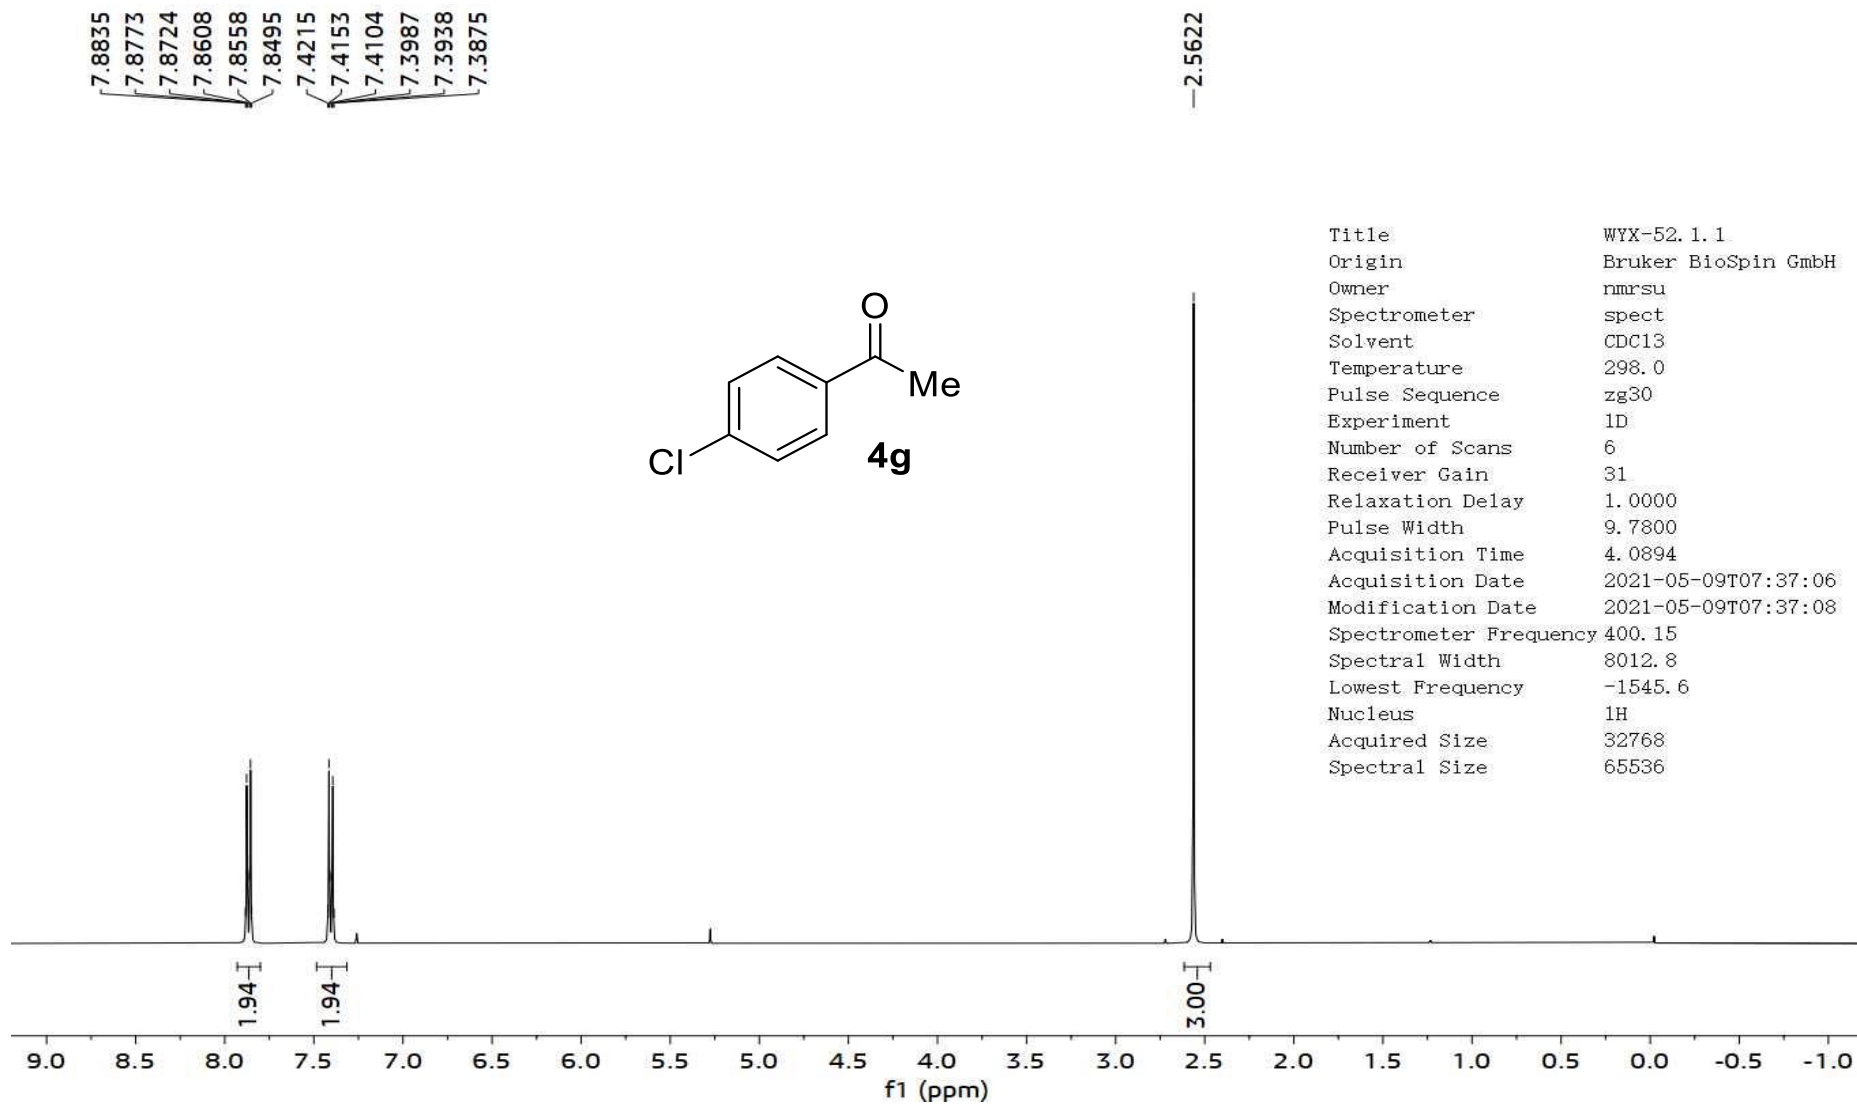



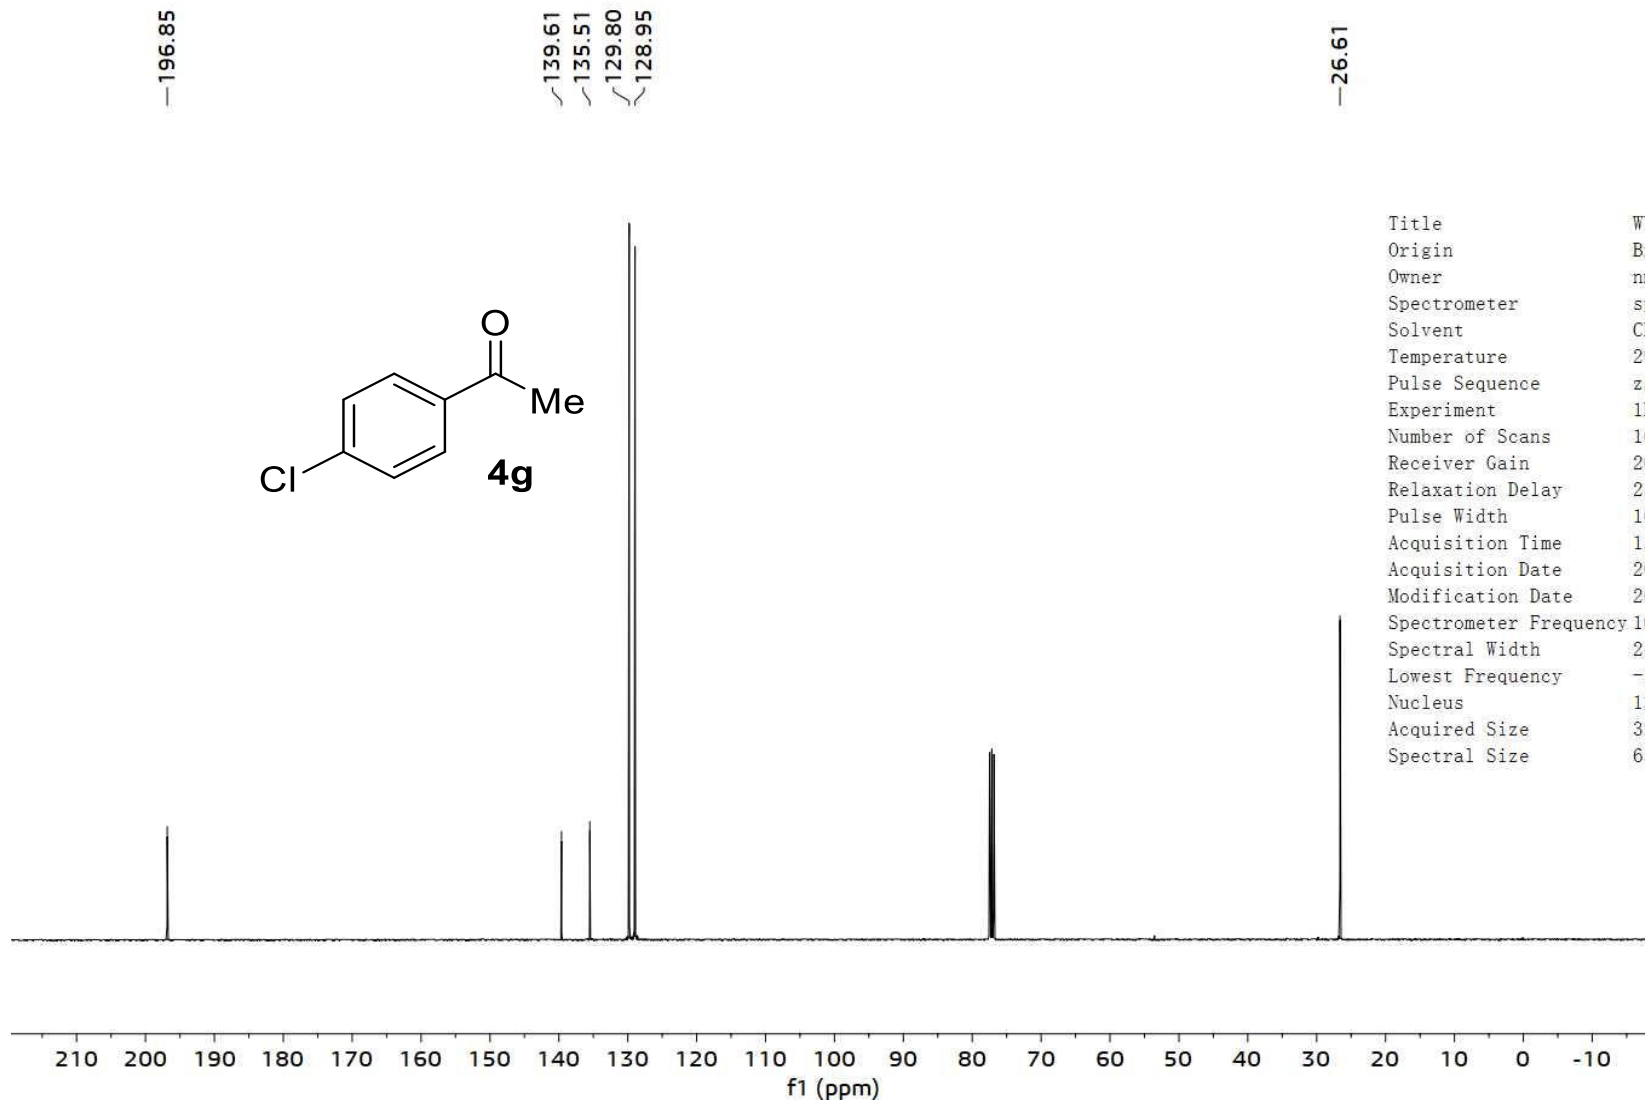

|                        |                     |
|------------------------|---------------------|
| Title                  | WYX-52.2.1          |
| Origin                 | Bruker BioSpin GmbH |
| Owner                  | nmrsu               |
| Spectrometer           | spect               |
| Solvent                | CDCl3               |
| Temperature            | 298.0               |
| Pulse Sequence         | zgpg30              |
| Experiment             | 1D                  |
| Number of Scans        | 1024                |
| Receiver Gain          | 202                 |
| Relaxation Delay       | 2.0000              |
| Pulse Width            | 10.5800             |
| Acquisition Time       | 1.3631              |
| Acquisition Date       | 2021-05-09T08:36:40 |
| Modification Date      | 2021-05-09T08:36:42 |
| Spectrometer Frequency | 100.62              |
| Spectral Width         | 24038.5             |
| Lowest Frequency       | -1950.2             |
| Nucleus                | 13C                 |
| Acquired Size          | 32768               |
| Spectral Size          | 65536               |

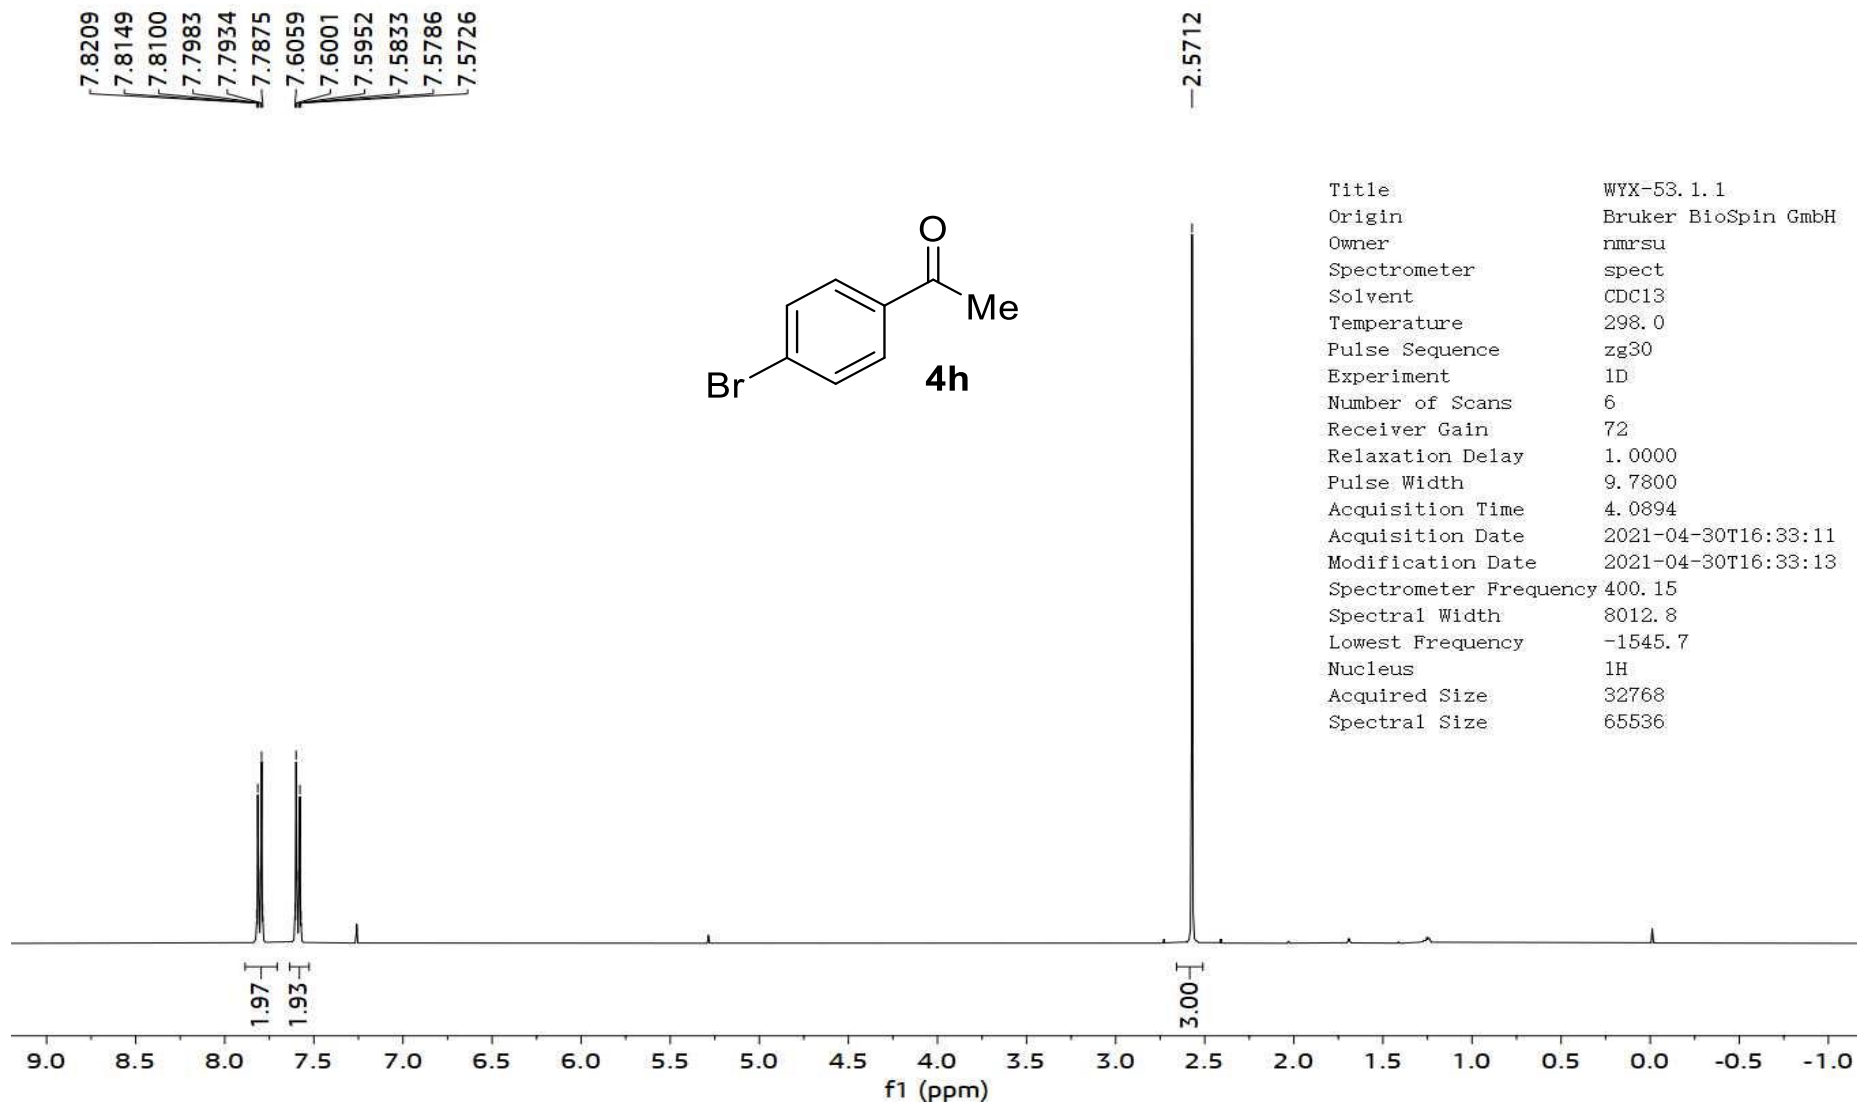

-197.09

135.94  
132.00  
129.95  
128.40

-26.64

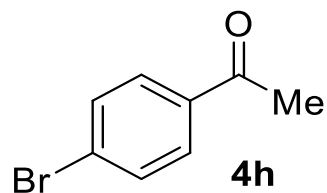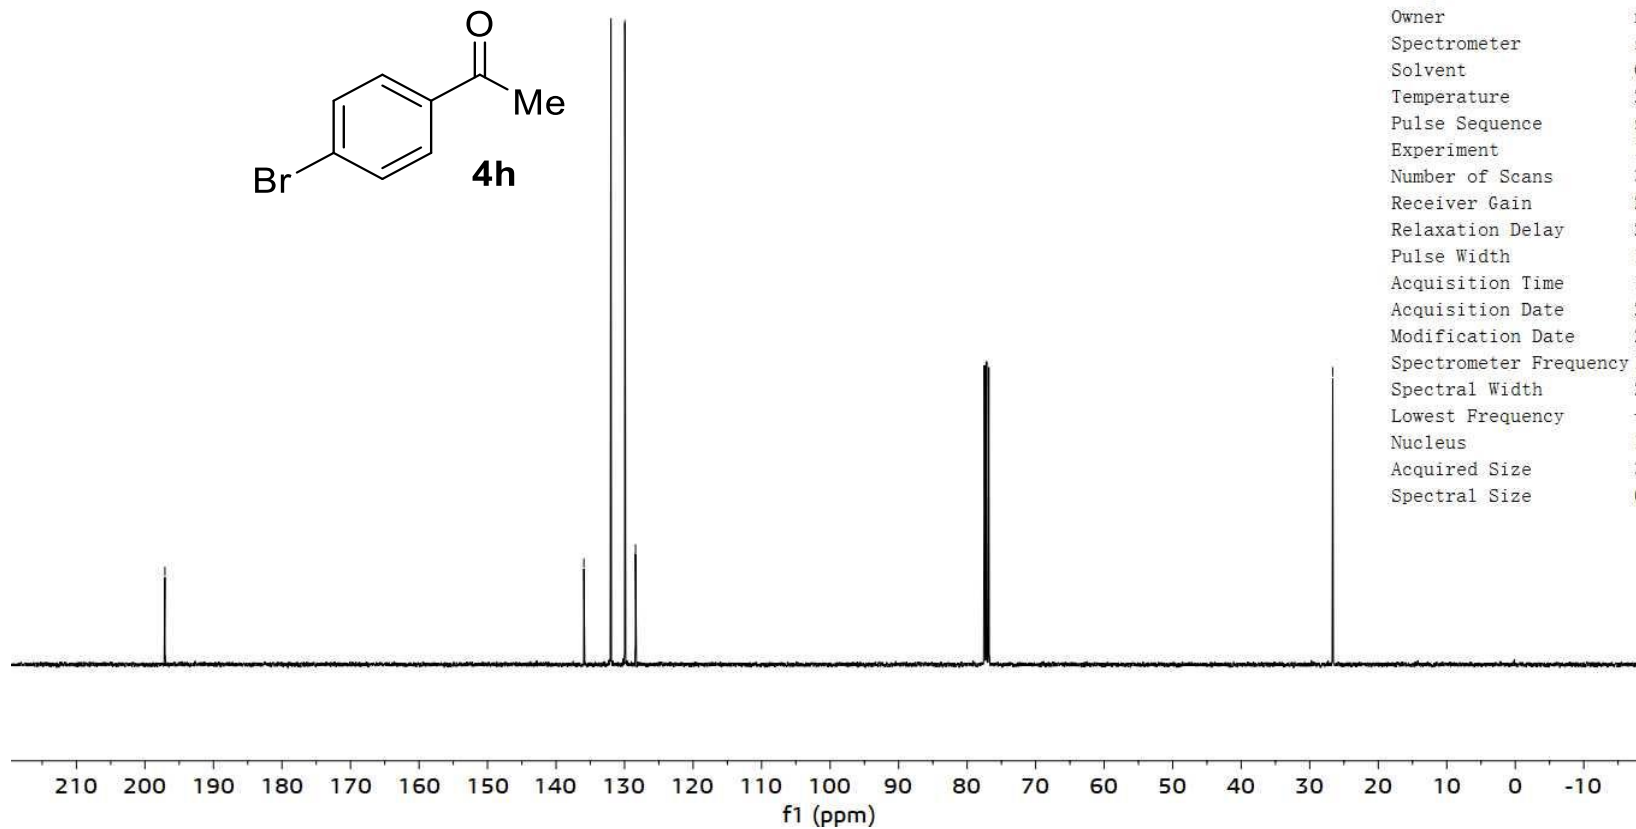

|                        |                     |
|------------------------|---------------------|
| Title                  | WYX-53.2.1          |
| Origin                 | Bruker BioSpin GmbH |
| Owner                  | nmrsu               |
| Spectrometer           | spect               |
| Solvent                | CDCl3               |
| Temperature            | 298.0               |
| Pulse Sequence         | zgpg30              |
| Experiment             | 1D                  |
| Number of Scans        | 350                 |
| Receiver Gain          | 202                 |
| Relaxation Delay       | 2.0000              |
| Pulse Width            | 10.5800             |
| Acquisition Time       | 1.3631              |
| Acquisition Date       | 2021-04-30T16:54:18 |
| Modification Date      | 2021-04-30T16:54:21 |
| Spectrometer Frequency | 100.62              |
| Spectral Width         | 24038.5             |
| Lowest Frequency       | -1947.7             |
| Nucleus                | 13C                 |
| Acquired Size          | 32768               |
| Spectral Size          | 65536               |

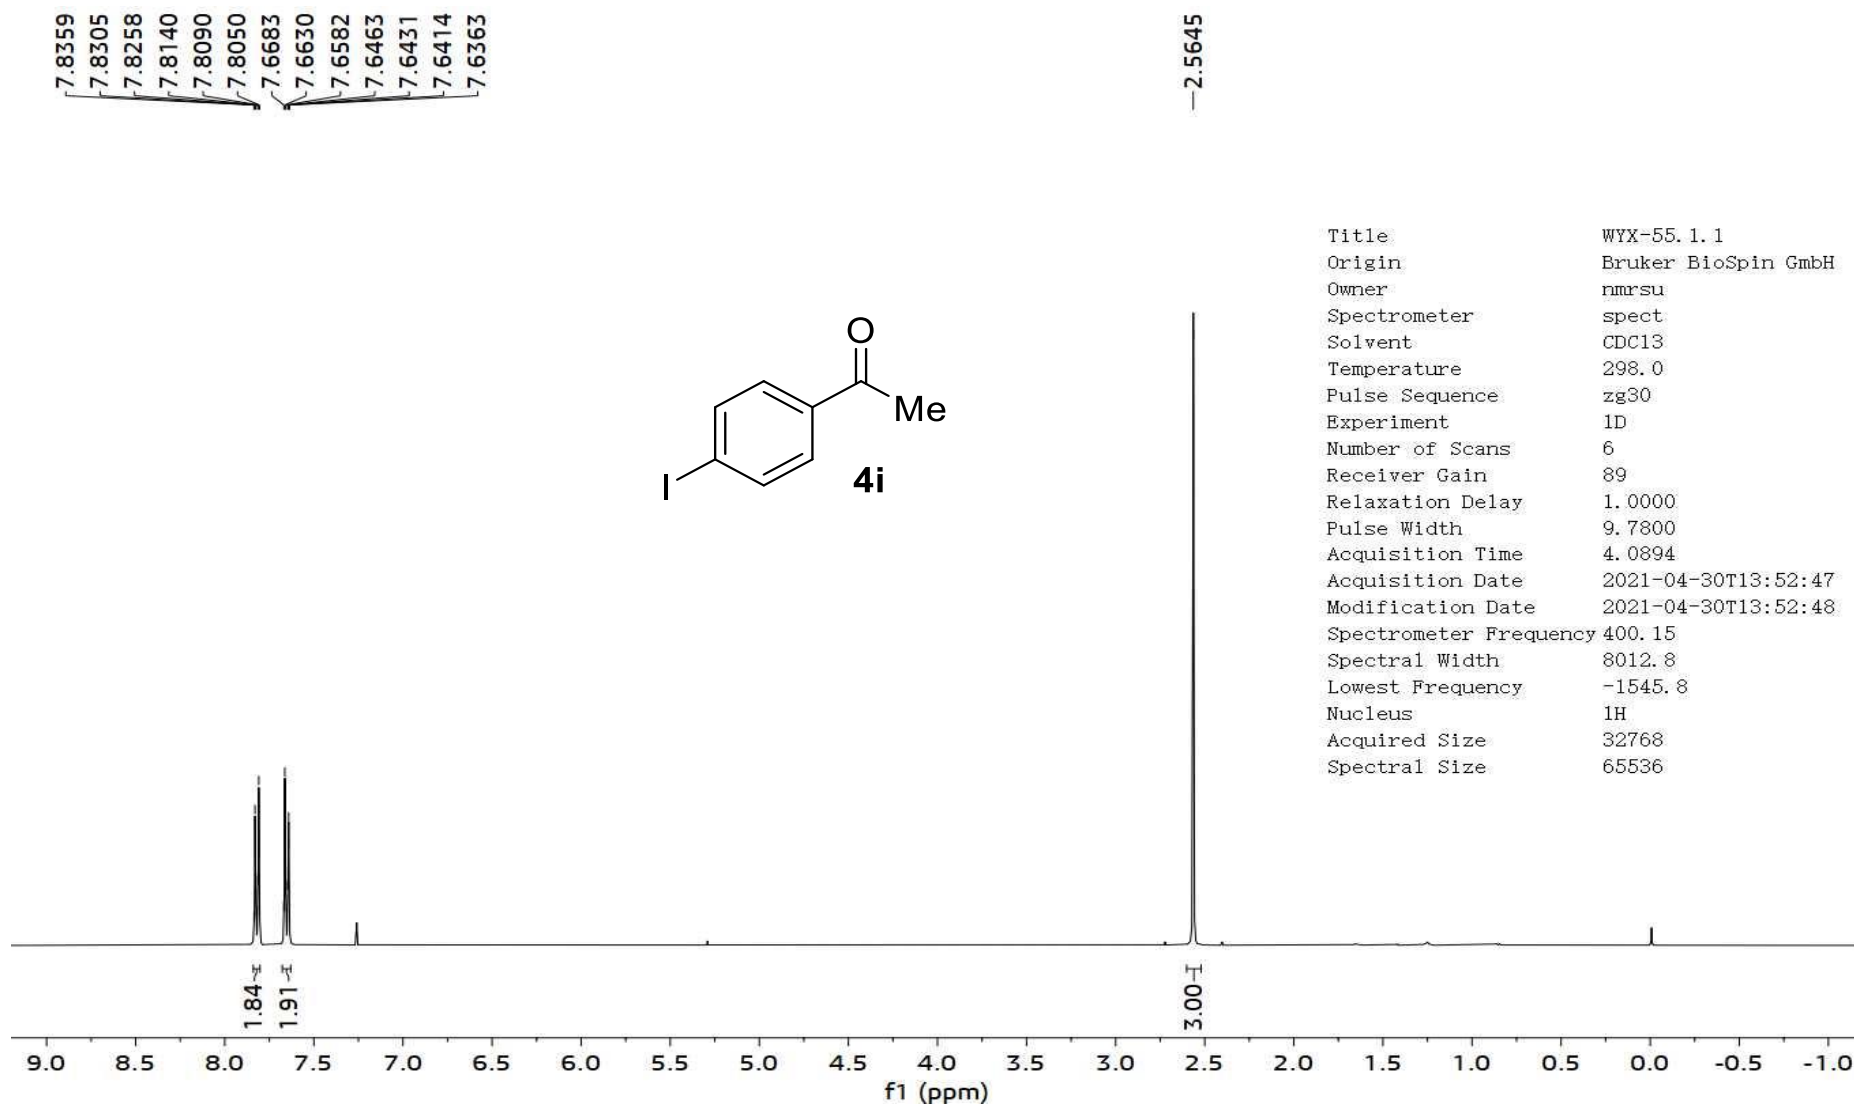

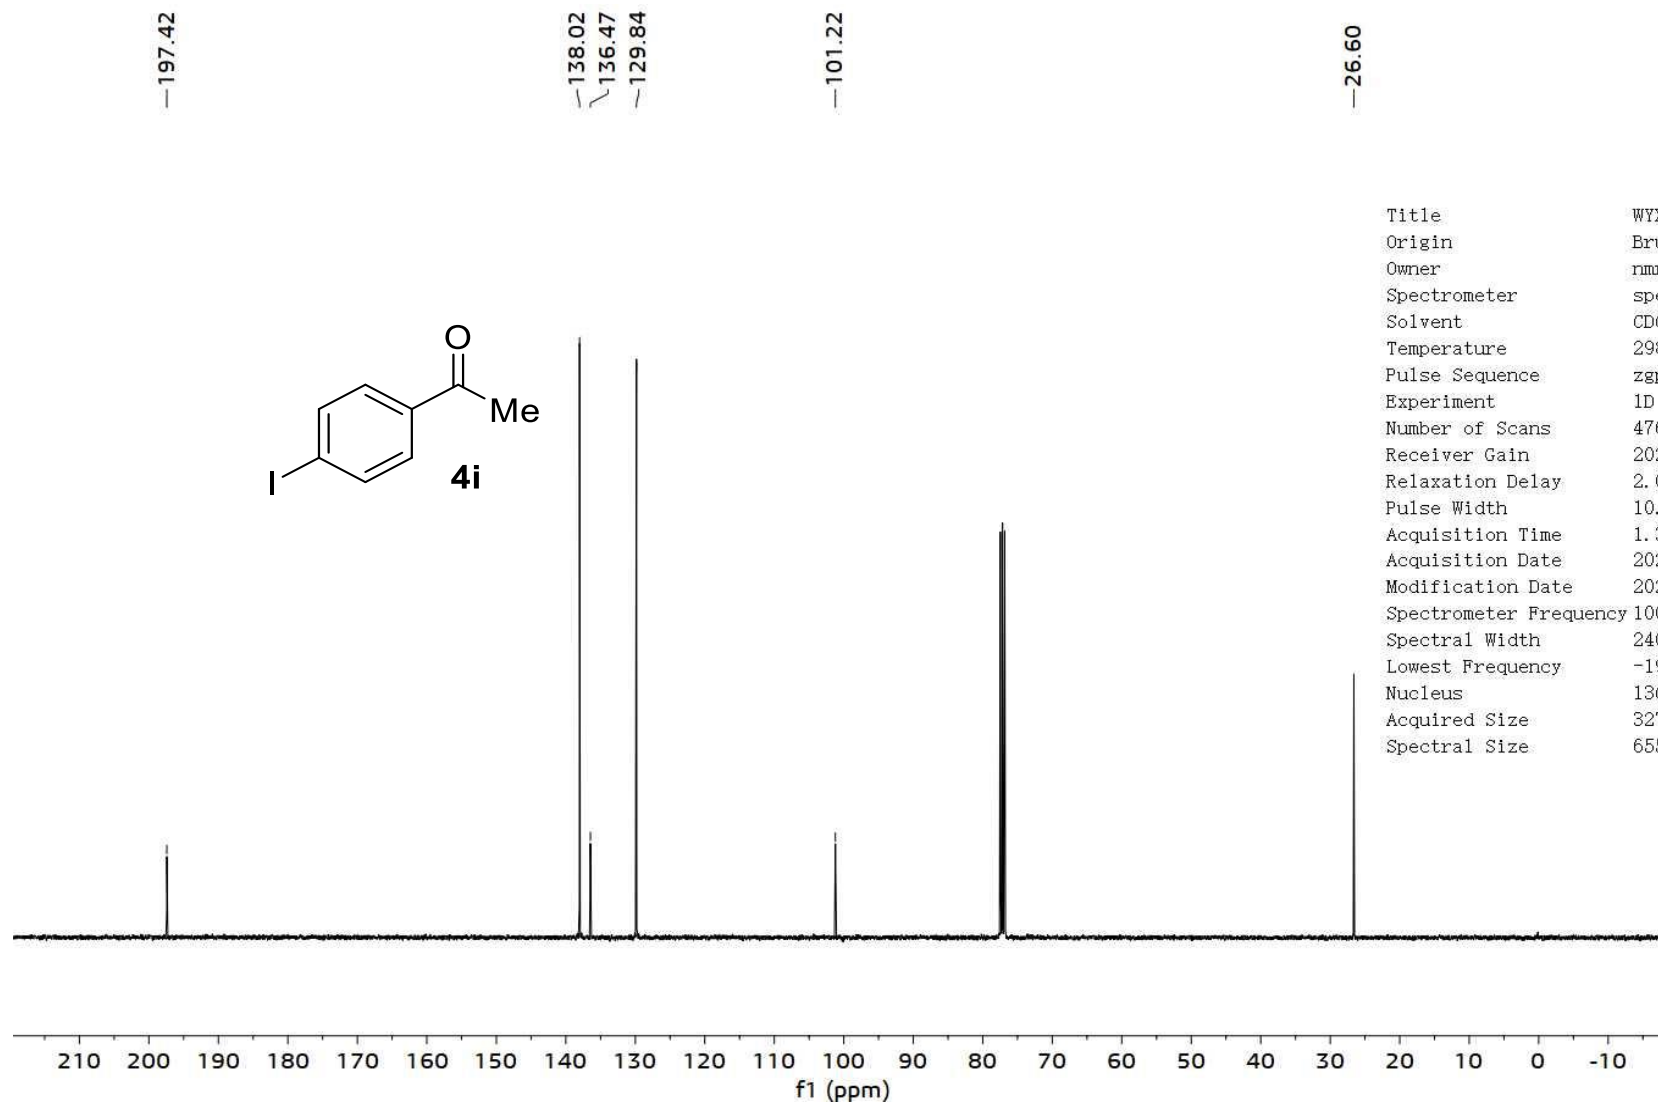

|                        |                     |
|------------------------|---------------------|
| Title                  | WYX-55.2.1          |
| Origin                 | Bruker BioSpin GmbH |
| Owner                  | nmrsu               |
| Spectrometer           | spect               |
| Solvent                | CDCl3               |
| Temperature            | 298.0               |
| Pulse Sequence         | zgpg30              |
| Experiment             | 1D                  |
| Number of Scans        | 476                 |
| Receiver Gain          | 202                 |
| Relaxation Delay       | 2.0000              |
| Pulse Width            | 10.5800             |
| Acquisition Time       | 1.3631              |
| Acquisition Date       | 2021-04-30T14:21:07 |
| Modification Date      | 2021-04-30T14:21:11 |
| Spectrometer Frequency | 100.62              |
| Spectral Width         | 24038.5             |
| Lowest Frequency       | -1947.3             |
| Nucleus                | 13C                 |
| Acquired Size          | 32768               |
| Spectral Size          | 65536               |

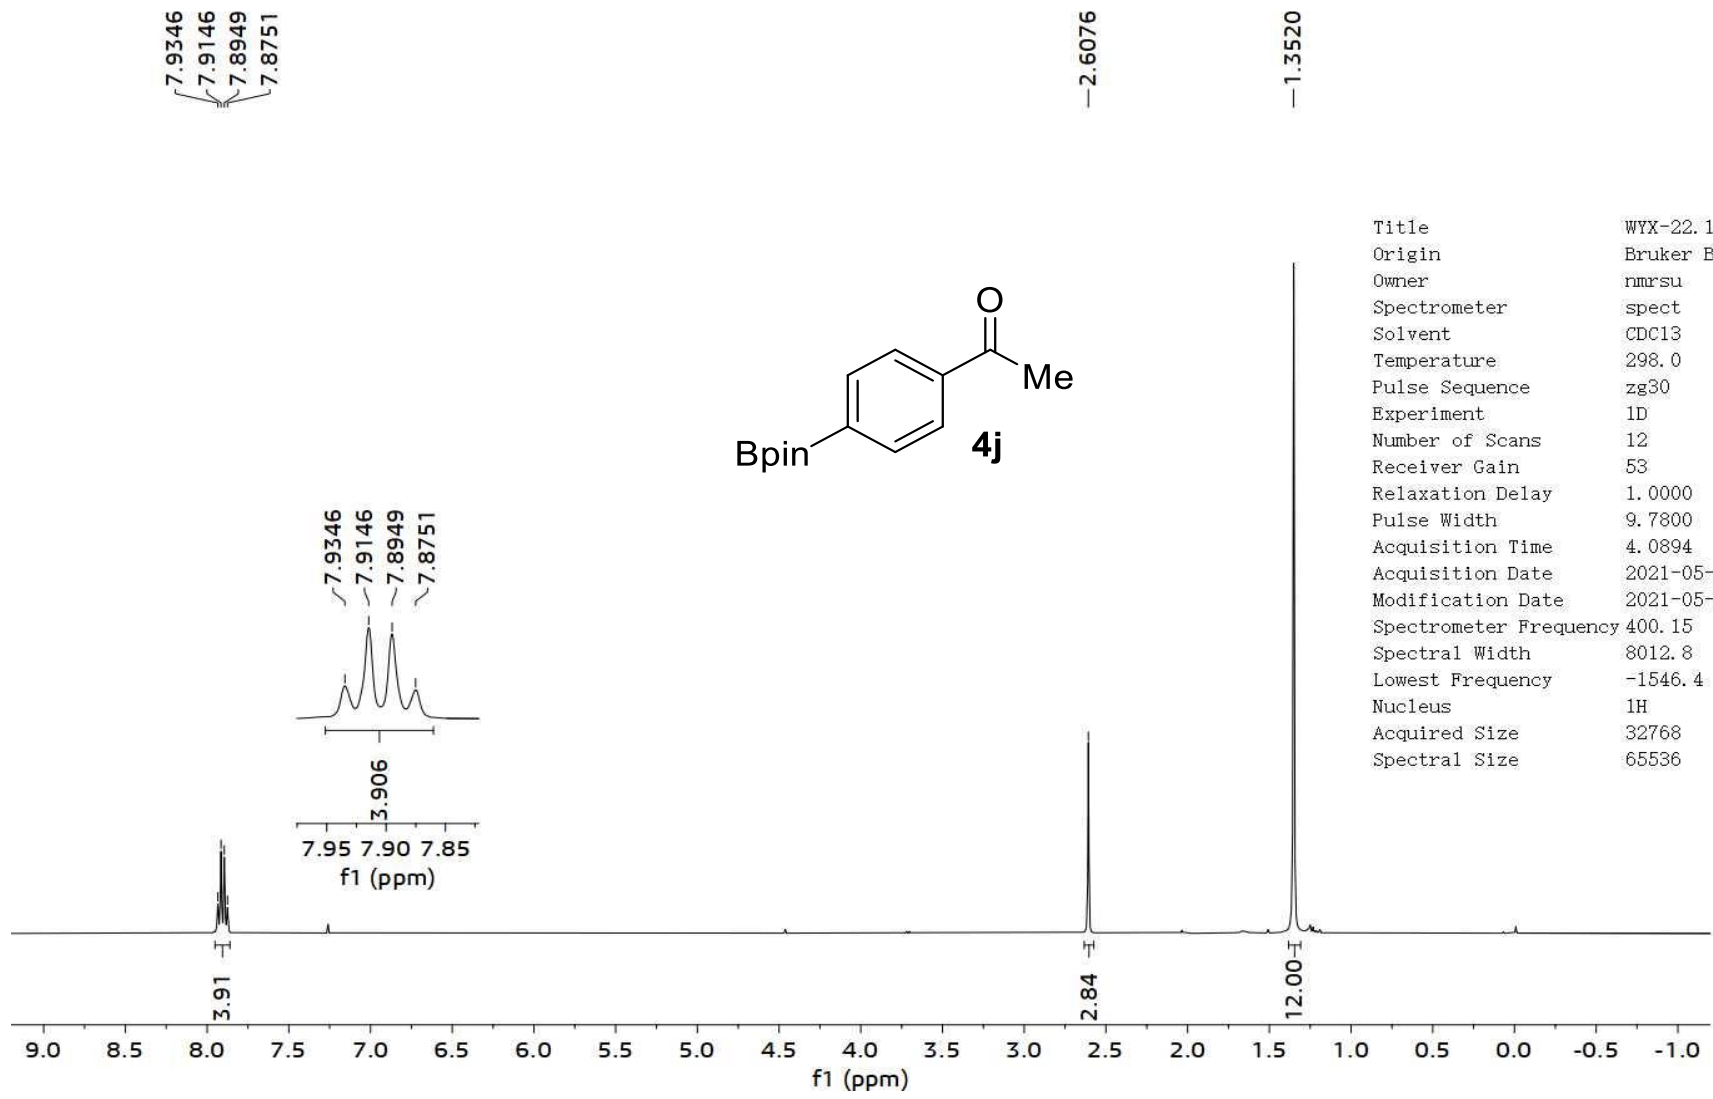

|                        |                     |
|------------------------|---------------------|
| Title                  | WYX-22. 1. 1        |
| Origin                 | Bruker BioSpin GmbH |
| Owner                  | nmrsu               |
| Spectrometer           | spect               |
| Solvent                | CDC13               |
| Temperature            | 298.0               |
| Pulse Sequence         | zg30                |
| Experiment             | 1D                  |
| Number of Scans        | 12                  |
| Receiver Gain          | 53                  |
| Relaxation Delay       | 1.0000              |
| Pulse Width            | 9.7800              |
| Acquisition Time       | 4.0894              |
| Acquisition Date       | 2021-05-17T14:13:59 |
| Modification Date      | 2021-05-17T14:13:58 |
| Spectrometer Frequency | 400.15              |
| Spectral Width         | 8012.8              |
| Lowest Frequency       | -1546.4             |
| Nucleus                | 1H                  |
| Acquired Size          | 32768               |
| Spectral Size          | 65536               |

—198.57

~139.12  
~135.04  
~127.40

—84.33

~26.89  
~25.00

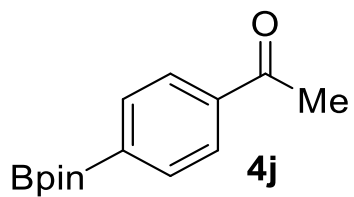

|                        |                     |
|------------------------|---------------------|
| Title                  | WYX-22.2.1          |
| Origin                 | Bruker BioSpin GmbH |
| Owner                  | nmrsu               |
| Spectrometer           | spect               |
| Solvent                | CDC13               |
| Temperature            | 298.1               |
| Pulse Sequence         | zgpg30              |
| Experiment             | 1D                  |
| Number of Scans        | 250                 |
| Receiver Gain          | 202                 |
| Relaxation Delay       | 2.0000              |
| Pulse Width            | 10.5800             |
| Acquisition Time       | 1.3631              |
| Acquisition Date       | 2021-05-17T14:29:21 |
| Modification Date      | 2021-05-17T14:29:22 |
| Spectrometer Frequency | 100.62              |
| Spectral Width         | 24038.5             |
| Lowest Frequency       | -1946.2             |
| Nucleus                | 13C                 |
| Acquired Size          | 32768               |
| Spectral Size          | 65536               |

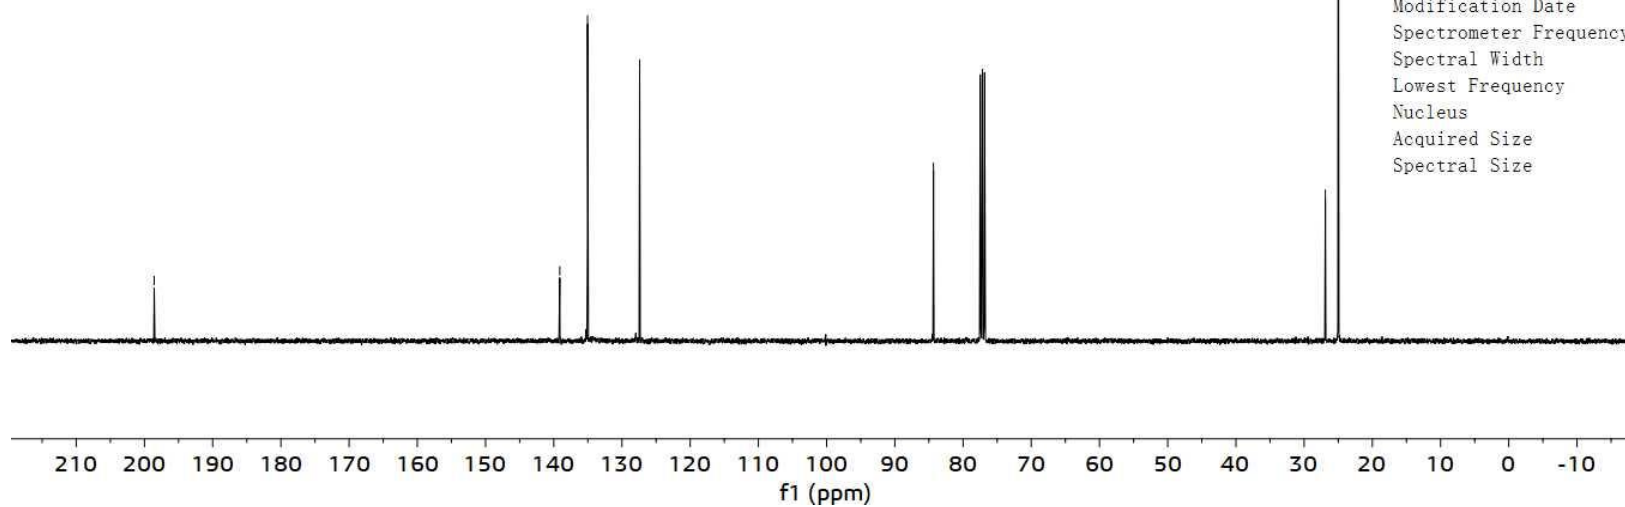

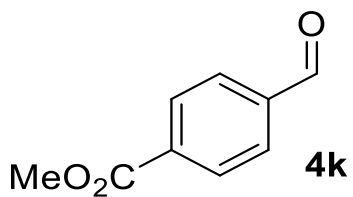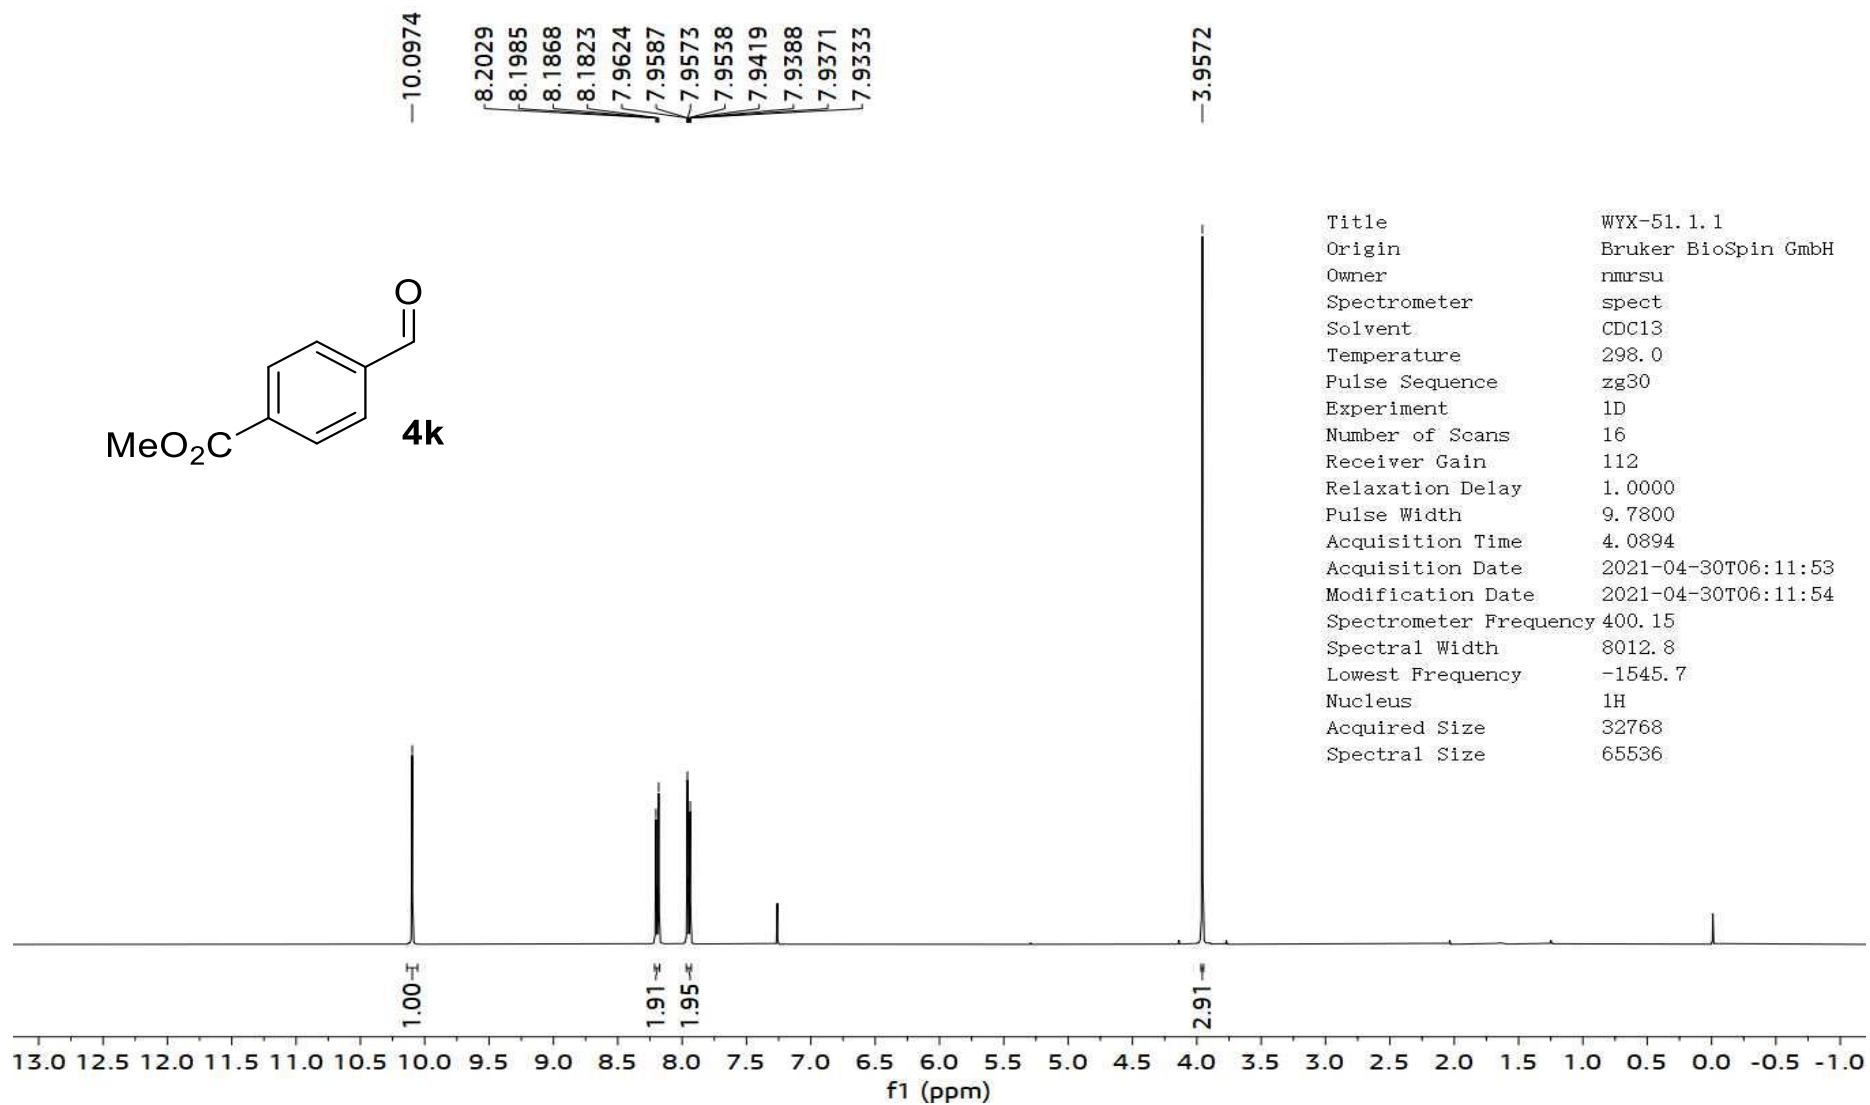



—191.75

—166.19

✓139.29

✓135.23

✓130.33

✓129.65

—52.71

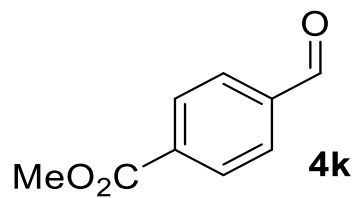

|                        |                     |
|------------------------|---------------------|
| Title                  | WYX-51.2.1          |
| Origin                 | Bruker BioSpin GmbH |
| Owner                  | nmrsu               |
| Spectrometer           | spect               |
| Solvent                | CDC13               |
| Temperature            | 298.0               |
| Pulse Sequence         | zgpg30              |
| Experiment             | 1D                  |
| Number of Scans        | 1024                |
| Receiver Gain          | 202                 |
| Relaxation Delay       | 2.0000              |
| Pulse Width            | 10.5800             |
| Acquisition Time       | 1.3631              |
| Acquisition Date       | 2021-04-30T07:11:30 |
| Modification Date      | 2021-04-30T07:11:32 |
| Spectrometer Frequency | 100.62              |
| Spectral Width         | 24038.5             |
| Lowest Frequency       | -1945.1             |
| Nucleus                | 13C                 |
| Acquired Size          | 32768               |
| Spectral Size          | 65536               |

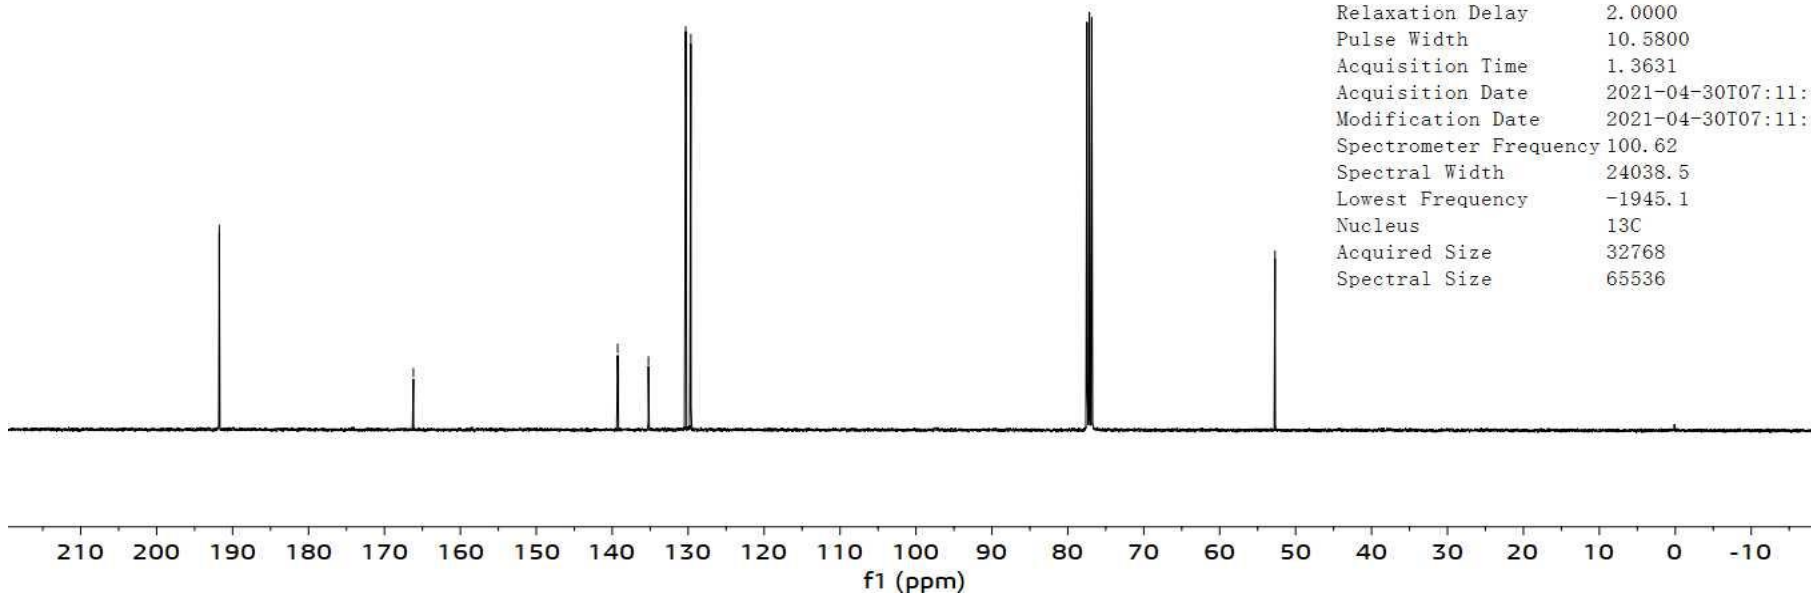

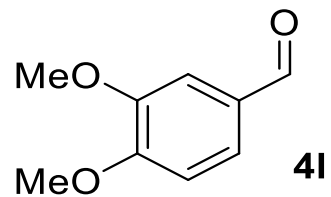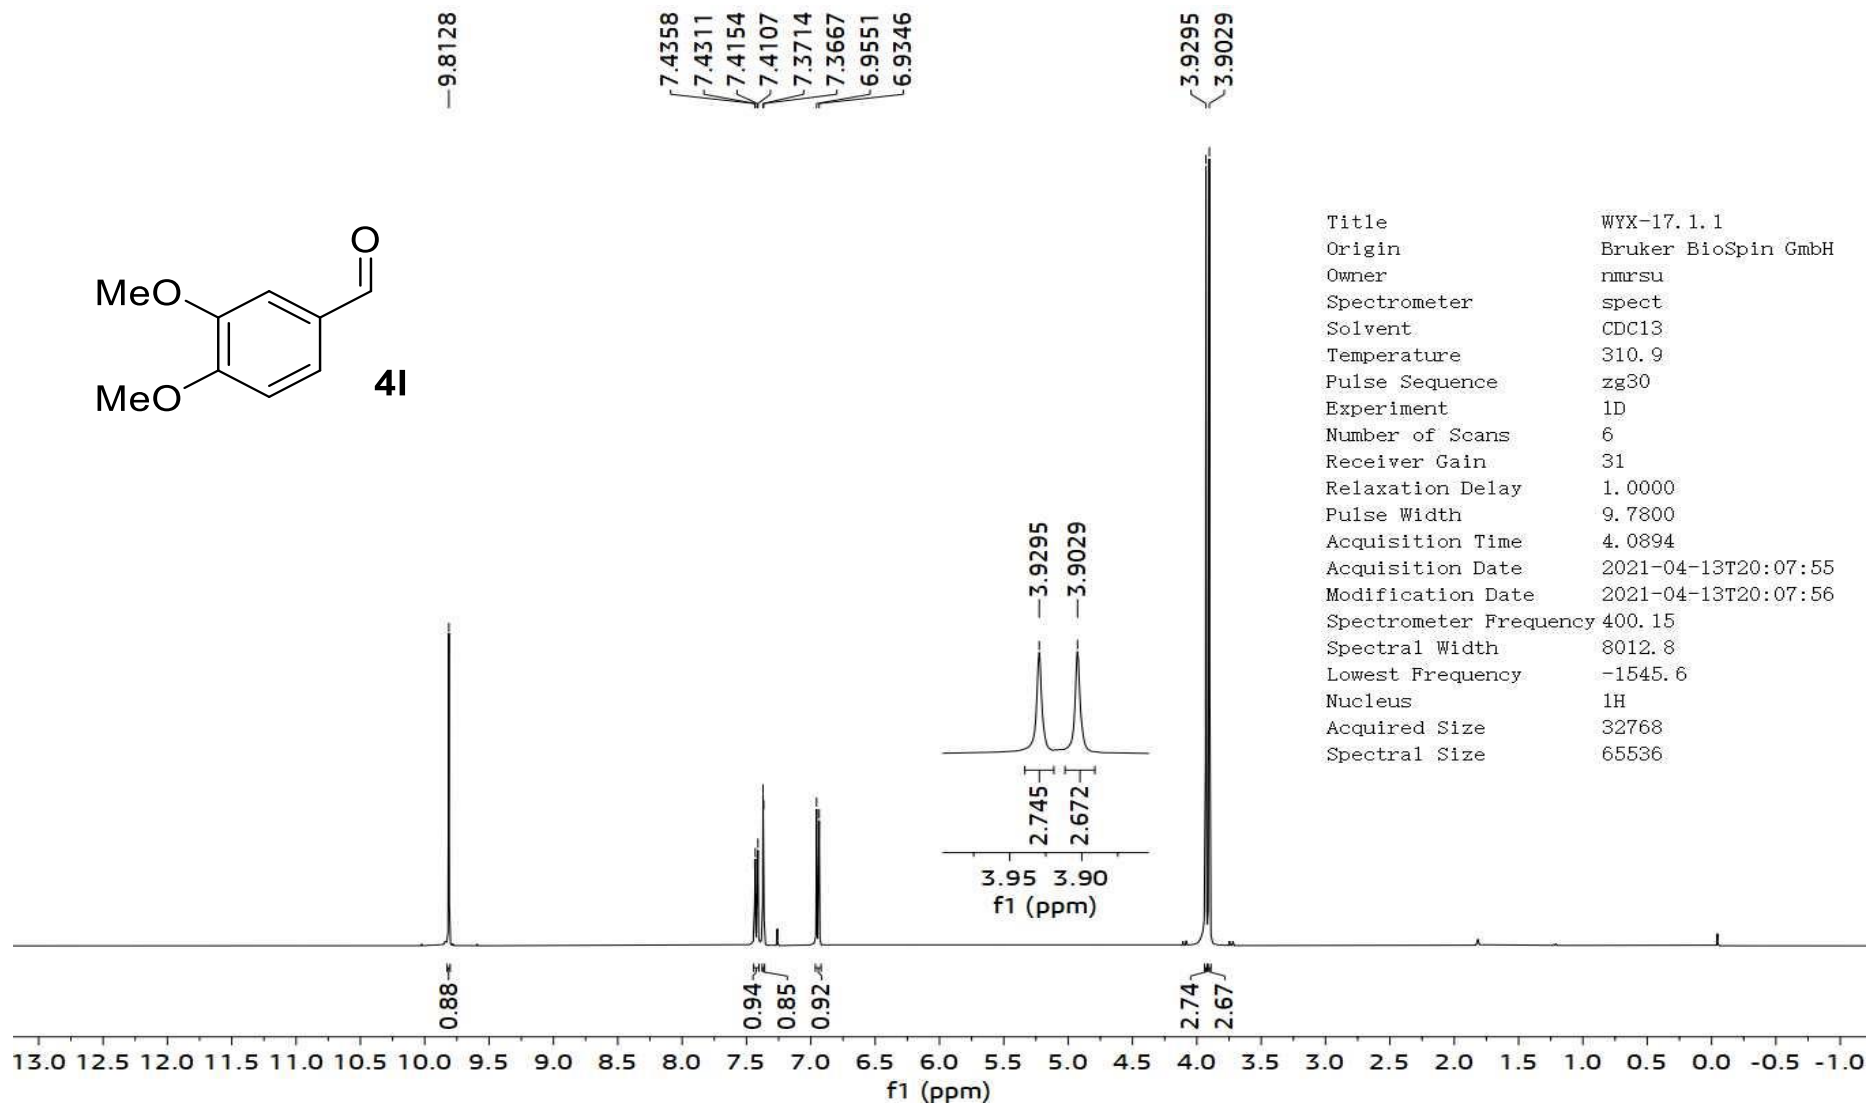

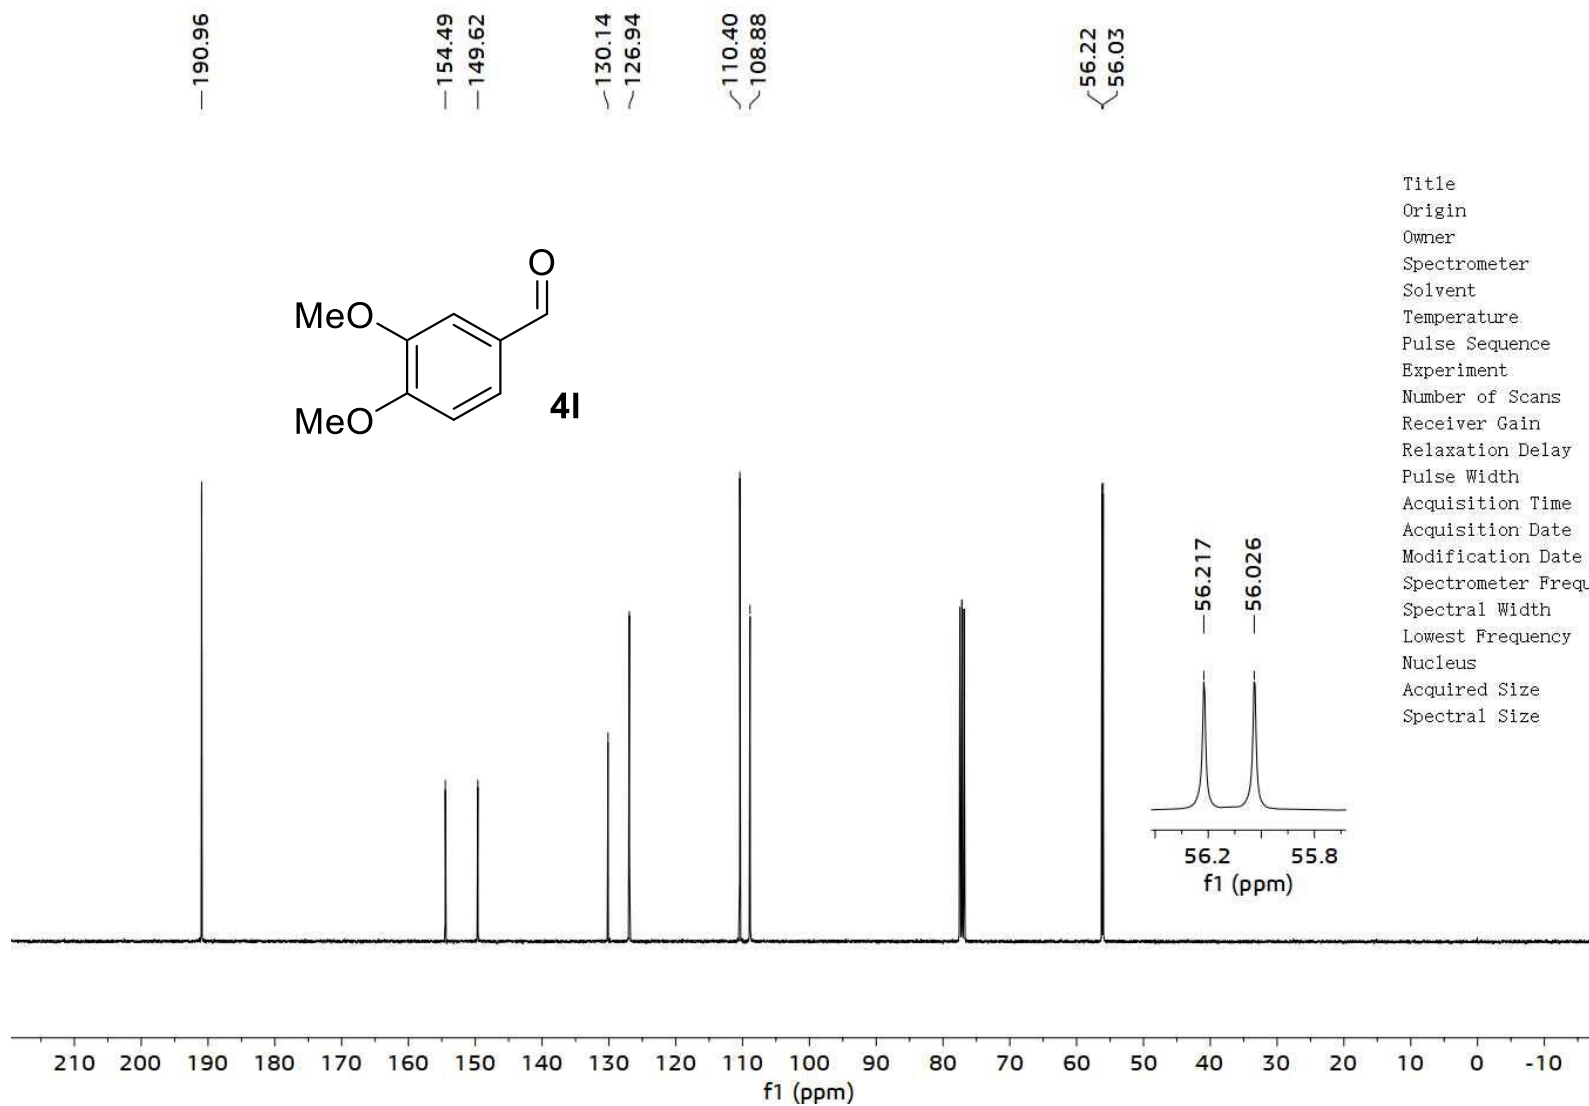

|                        |                     |
|------------------------|---------------------|
| Title                  | WYX-17. 2. 1        |
| Origin                 | Bruker BioSpin GmbH |
| Owner                  | nmrsu               |
| Spectrometer           | spect               |
| Solvent                | CDC13               |
| Temperature            | 310. 8              |
| Pulse Sequence         | zpg30               |
| Experiment             | 1D                  |
| Number of Scans        | 750                 |
| Receiver Gain          | 202                 |
| Relaxation Delay       | 2. 0000             |
| Pulse Width            | 10. 5800            |
| Acquisition Time       | 1. 3631             |
| Acquisition Date       | 2021-04-13T20:51:55 |
| Modification Date      | 2021-04-13T20:51:56 |
| Spectrometer Frequency | 100. 62             |
| Spectral Width         | 24038. 5            |
| Lowest Frequency       | -1953. 9            |
| Nucleus                | 13C                 |
| Acquired Size          | 32768               |
| Spectral Size          | 65536               |

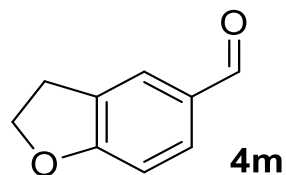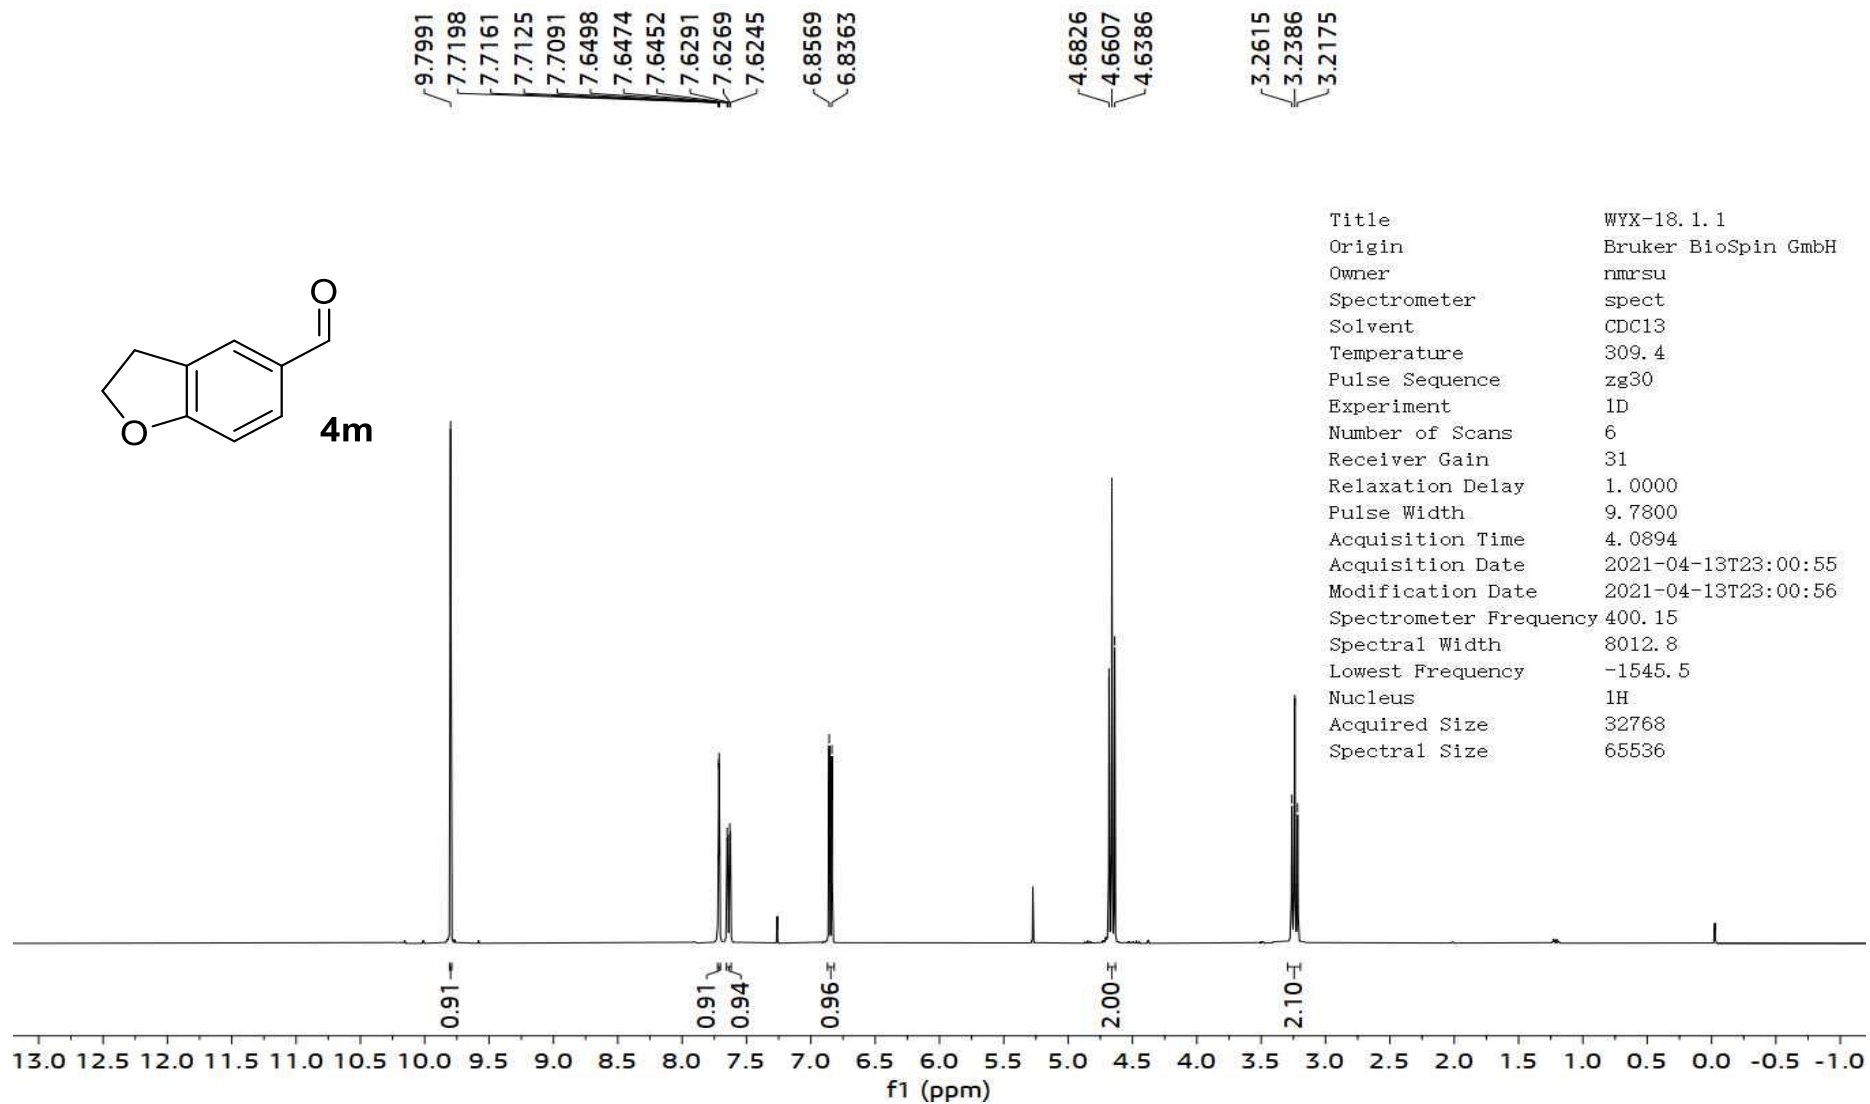

|                        |                     |
|------------------------|---------------------|
| Title                  | WYX-18.1.1          |
| Origin                 | Bruker BioSpin GmbH |
| Owner                  | nmrsu               |
| Spectrometer           | spect               |
| Solvent                | CDC13               |
| Temperature            | 309.4               |
| Pulse Sequence         | zg30                |
| Experiment             | 1D                  |
| Number of Scans        | 6                   |
| Receiver Gain          | 31                  |
| Relaxation Delay       | 1.0000              |
| Pulse Width            | 9.7800              |
| Acquisition Time       | 4.0894              |
| Acquisition Date       | 2021-04-13T23:00:55 |
| Modification Date      | 2021-04-13T23:00:56 |
| Spectrometer Frequency | 400.15              |
| Spectral Width         | 8012.8              |
| Lowest Frequency       | -1545.5             |
| Nucleus                | 1H                  |
| Acquired Size          | 32768               |
| Spectral Size          | 65536               |

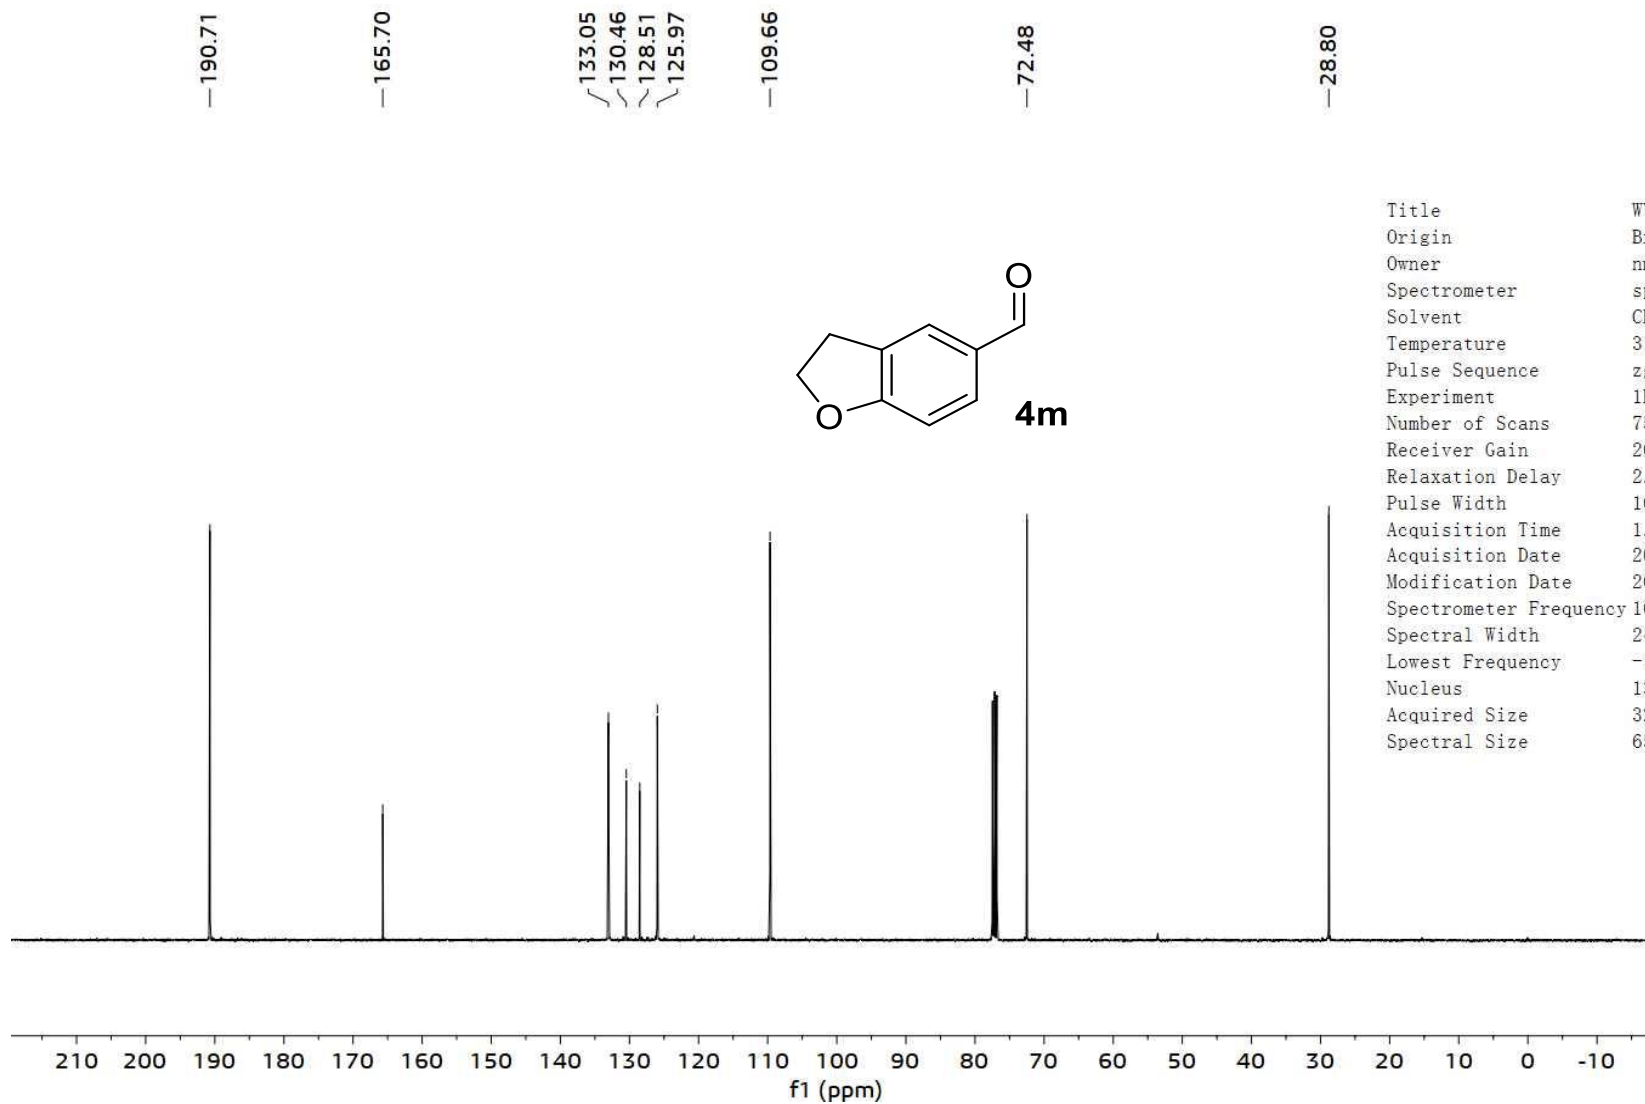

|                        |                     |
|------------------------|---------------------|
| Title                  | WYX-18.2.1          |
| Origin                 | Bruker BioSpin GmbH |
| Owner                  | nmrsu               |
| Spectrometer           | spect               |
| Solvent                | CDC13               |
| Temperature            | 312.2               |
| Pulse Sequence         | zgpg30              |
| Experiment             | 1D                  |
| Number of Scans        | 750                 |
| Receiver Gain          | 202                 |
| Relaxation Delay       | 2.0000              |
| Pulse Width            | 10.5800             |
| Acquisition Time       | 1.3631              |
| Acquisition Date       | 2021-04-13T23:44:55 |
| Modification Date      | 2021-04-13T23:44:56 |
| Spectrometer Frequency | 100.62              |
| Spectral Width         | 24038.5             |
| Lowest Frequency       | -1953.5             |
| Nucleus                | 13C                 |
| Acquired Size          | 32768               |
| Spectral Size          | 65536               |

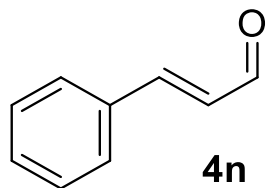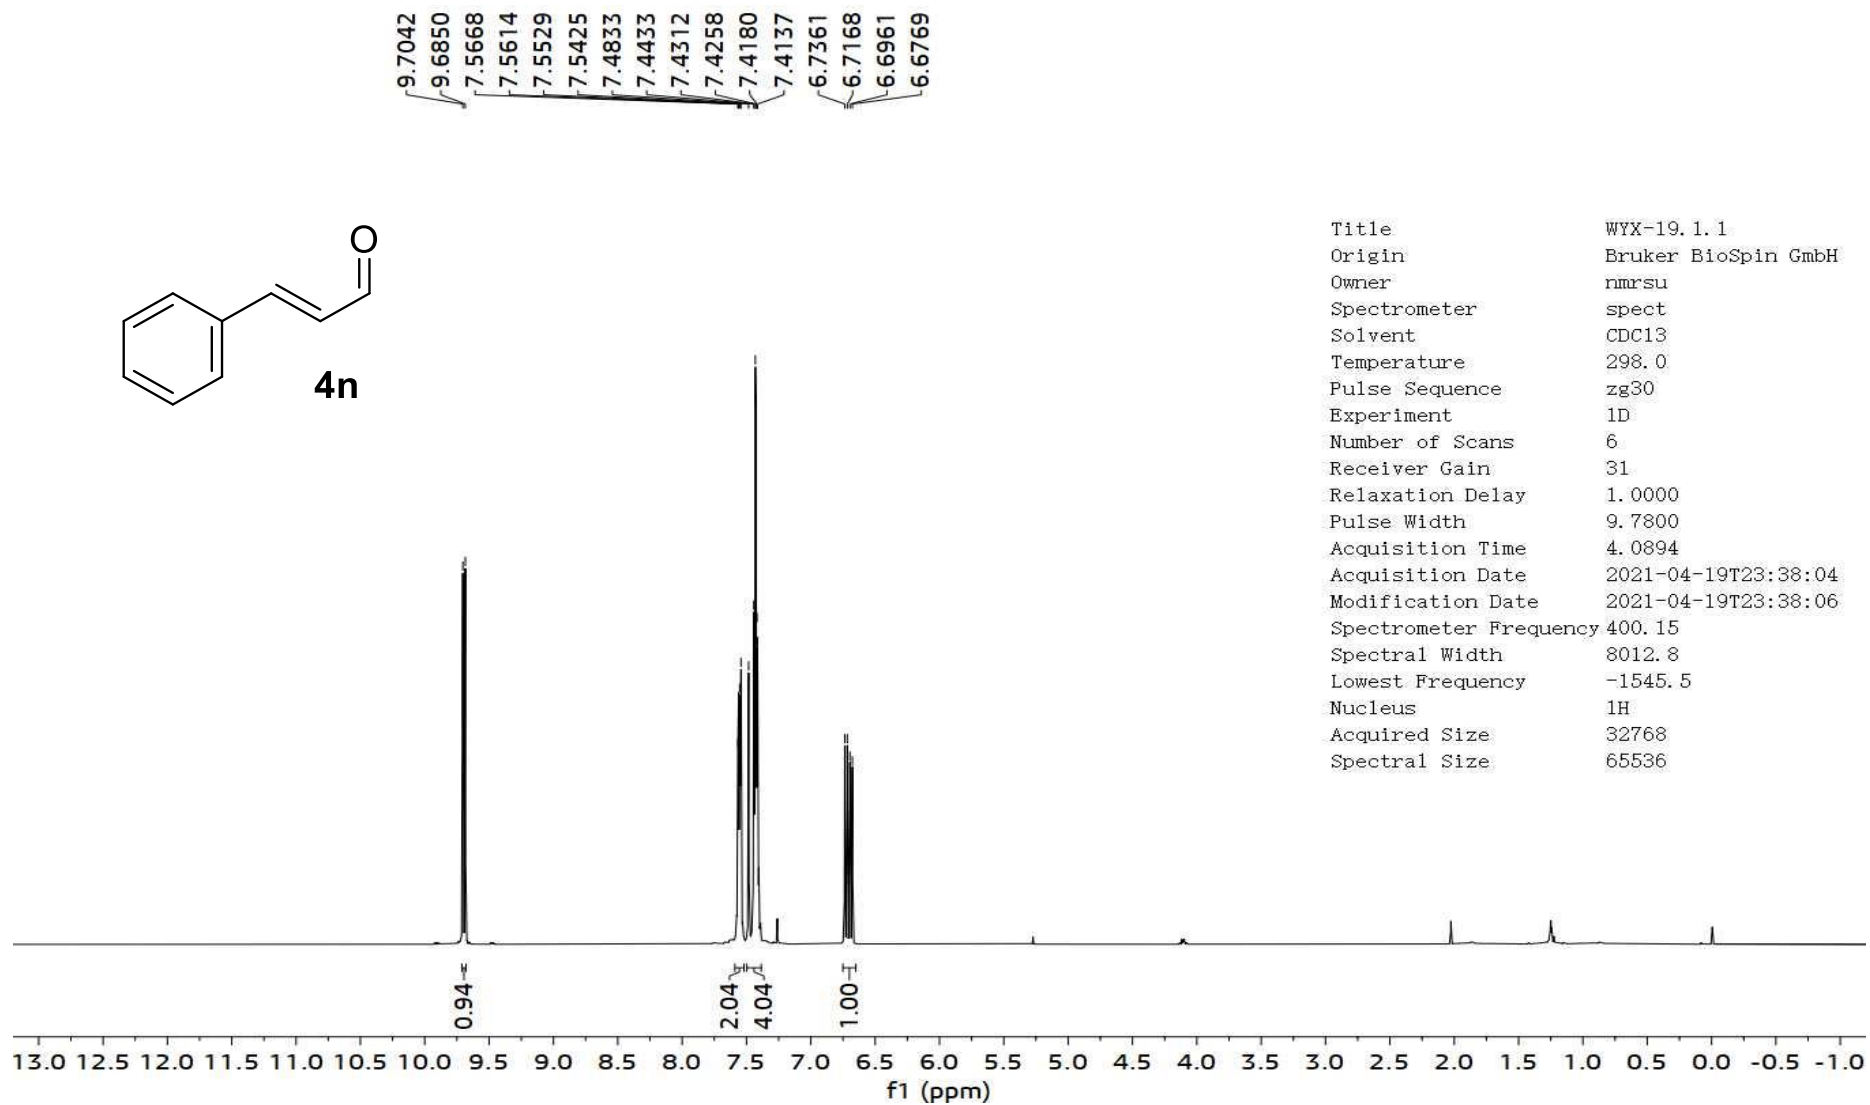

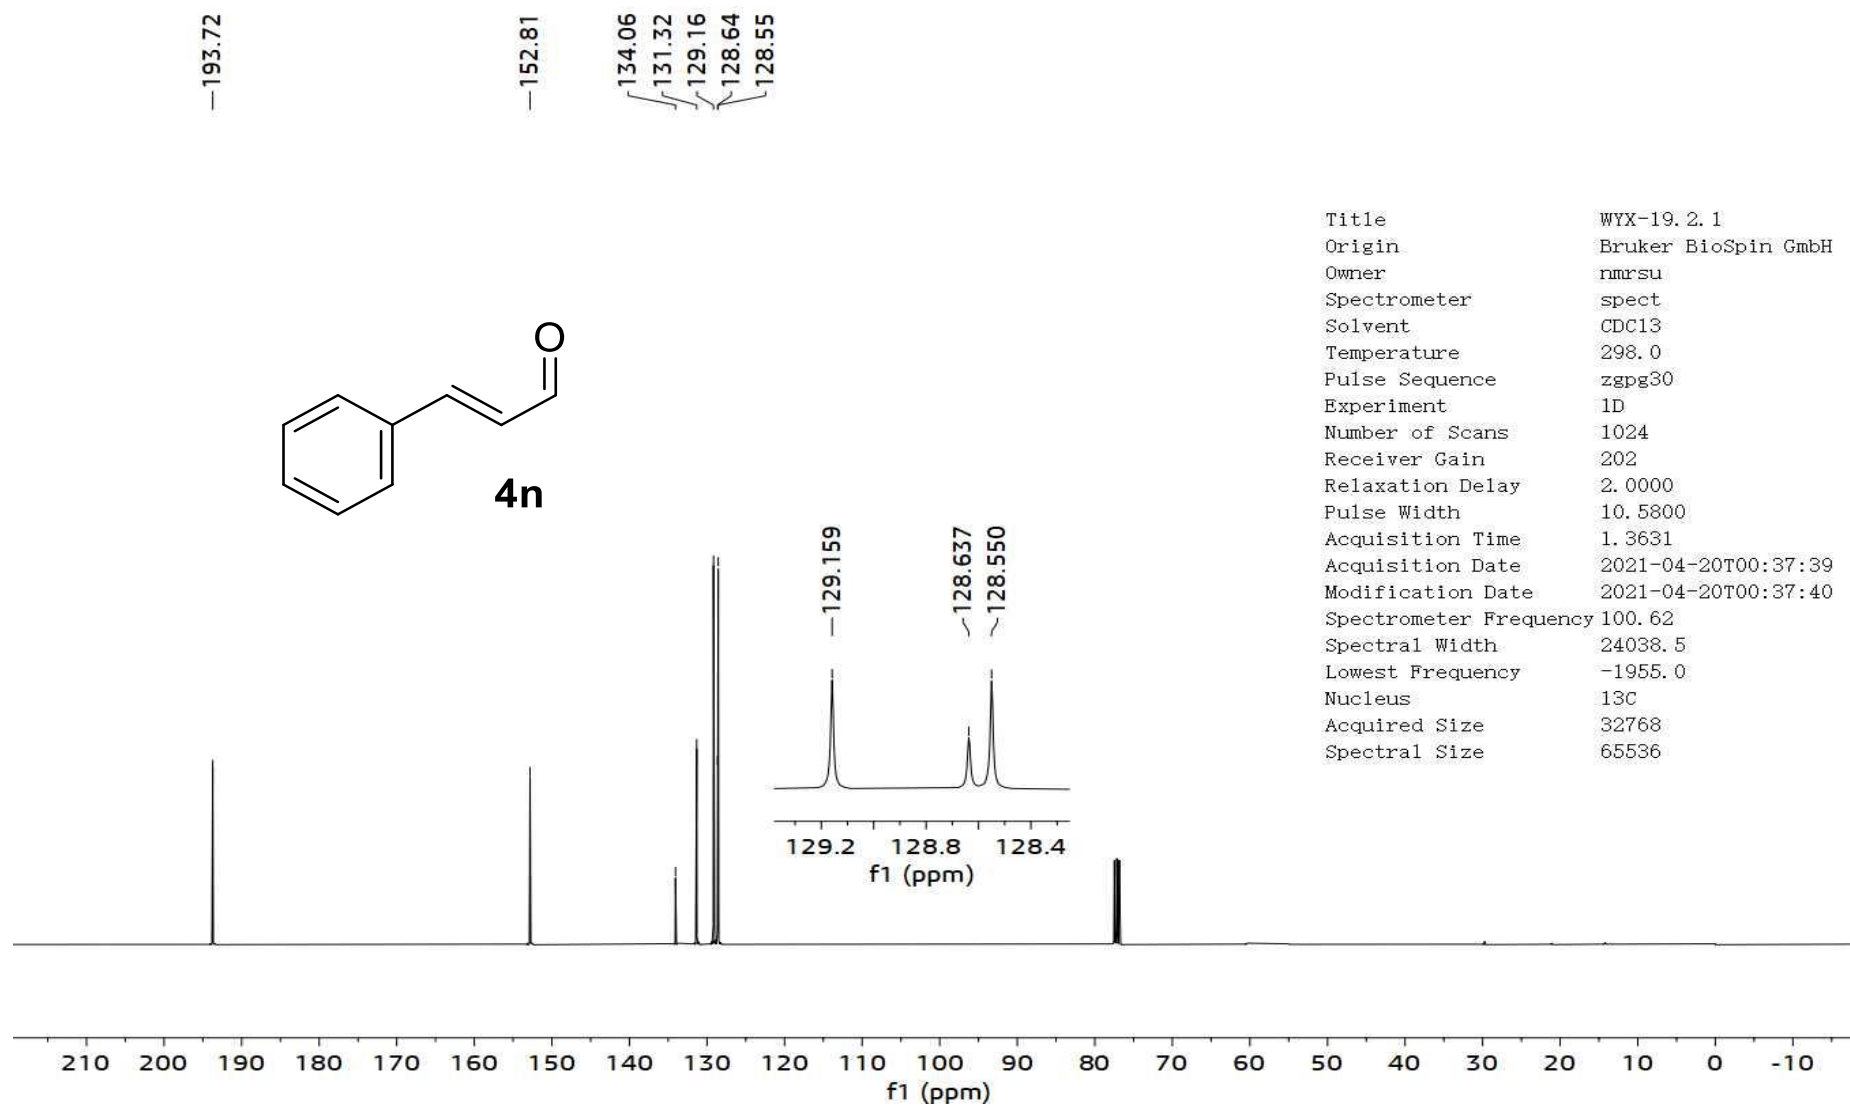

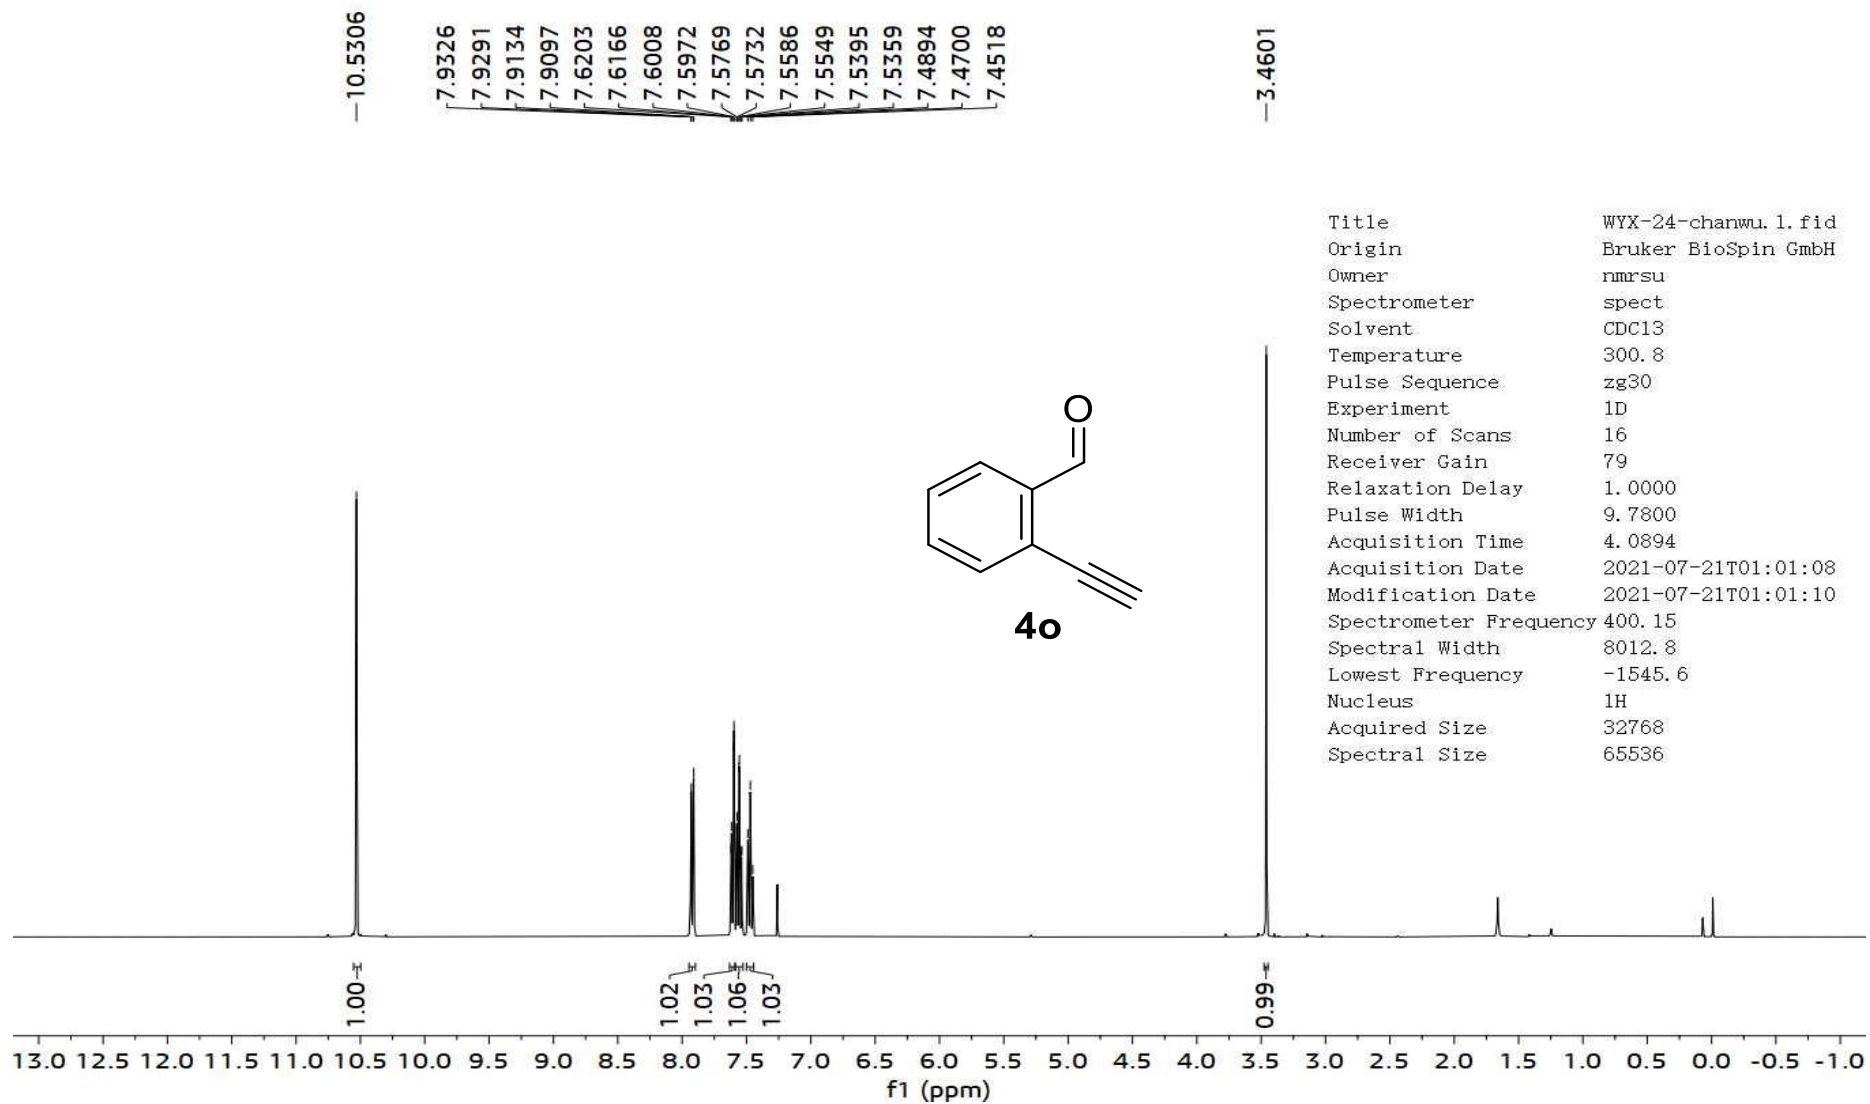

|                        |                     |
|------------------------|---------------------|
| Title                  | WYX-24-charwu.1.fid |
| Origin                 | Bruker BioSpin GmbH |
| Owner                  | nmrsu               |
| Spectrometer           | spect               |
| Solvent                | CDC13               |
| Temperature            | 300.8               |
| Pulse Sequence         | zg30                |
| Experiment             | 1D                  |
| Number of Scans        | 16                  |
| Receiver Gain          | 79                  |
| Relaxation Delay       | 1.0000              |
| Pulse Width            | 9.7800              |
| Acquisition Time       | 4.0894              |
| Acquisition Date       | 2021-07-21T01:01:08 |
| Modification Date      | 2021-07-21T01:01:10 |
| Spectrometer Frequency | 400.15              |
| Spectral Width         | 8012.8              |
| Lowest Frequency       | -1545.6             |
| Nucleus                | 1H                  |
| Acquired Size          | 32768               |
| Spectral Size          | 65536               |



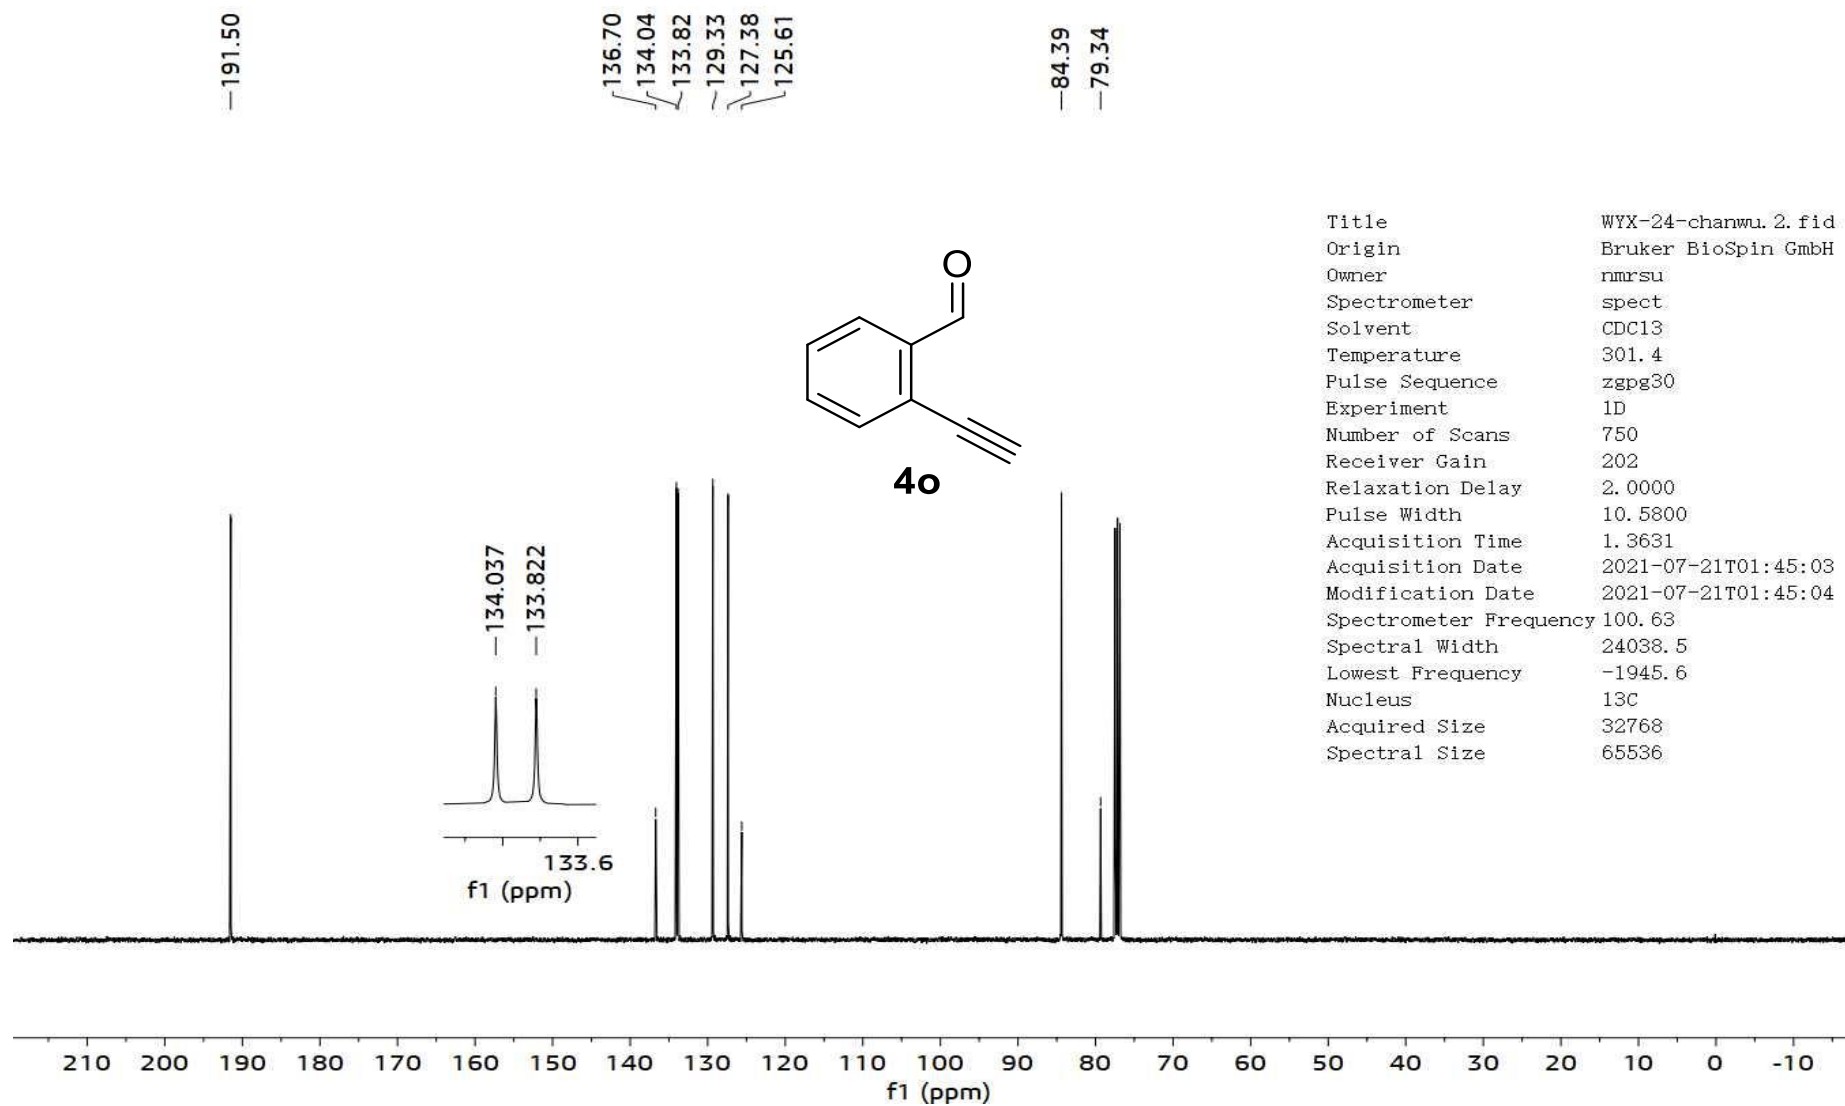

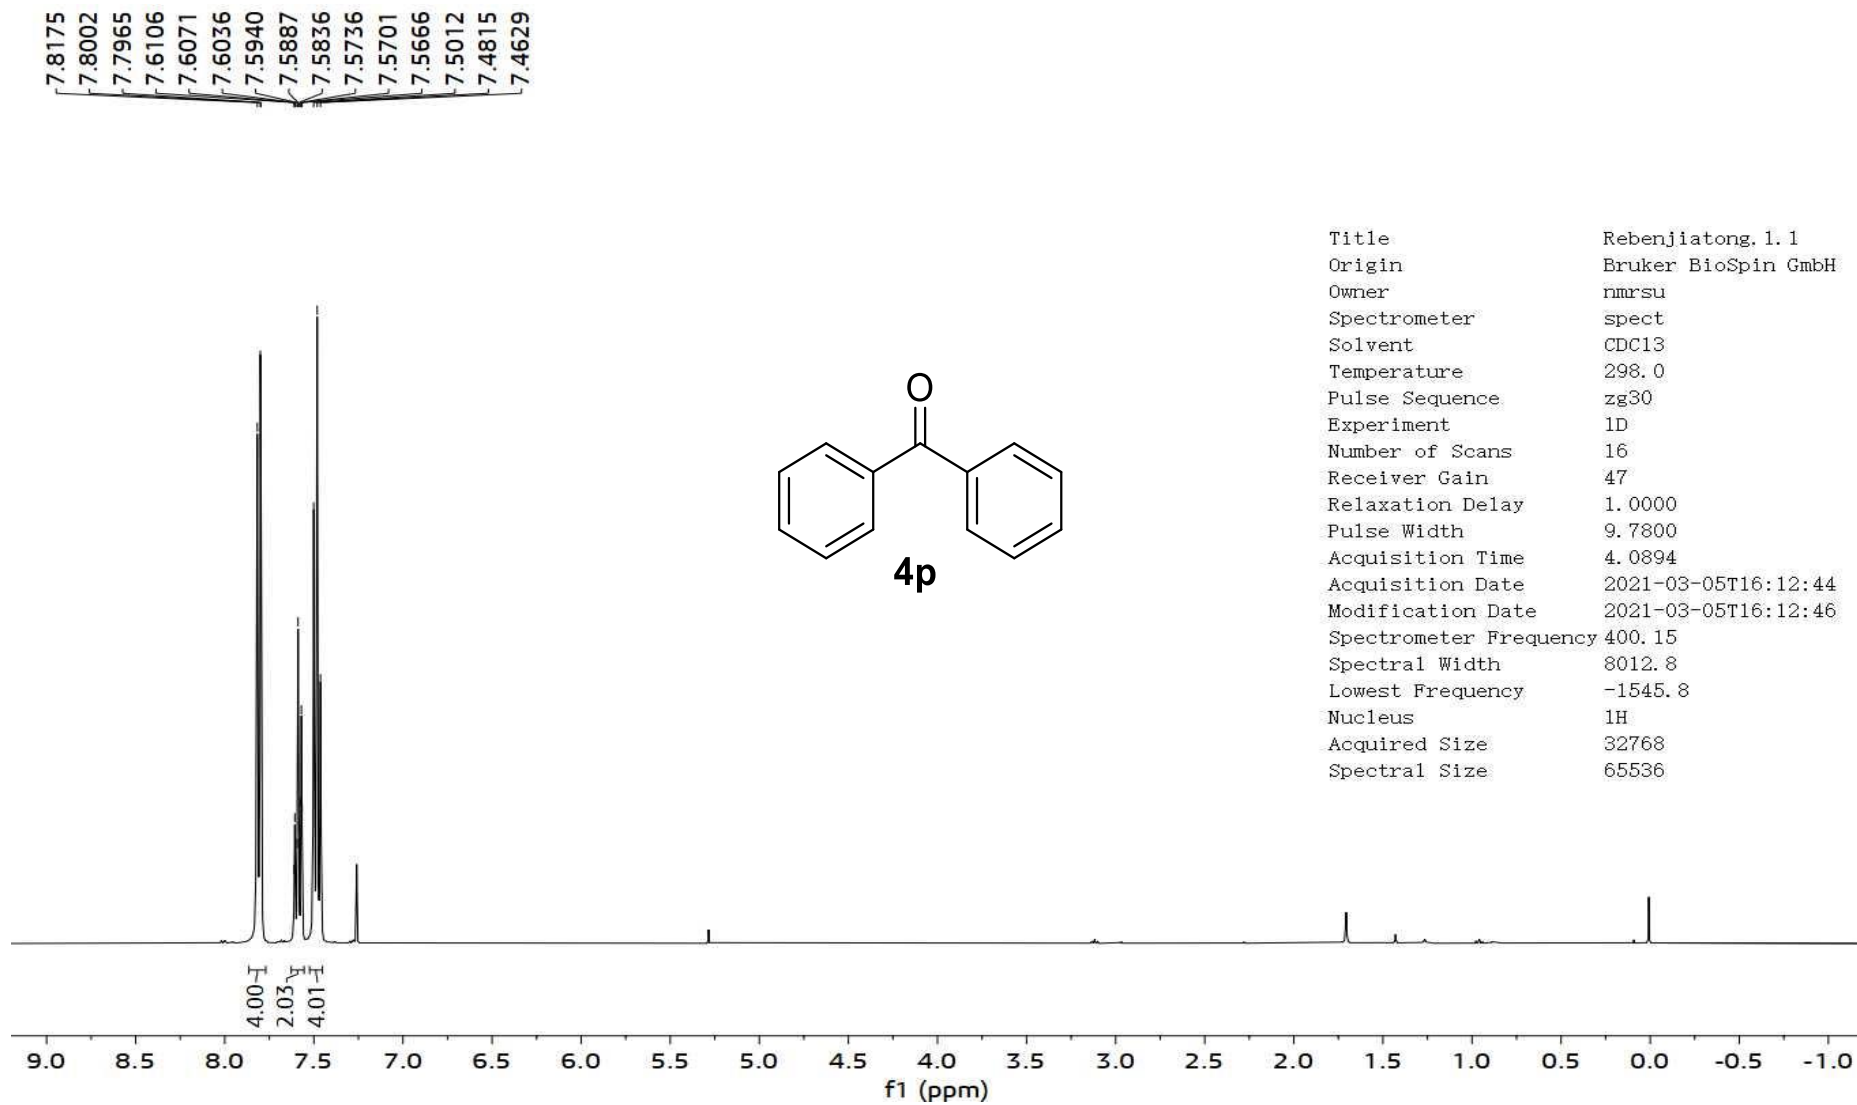

—196.84

✓137.71  
✓132.52  
✓130.16  
✓128.38

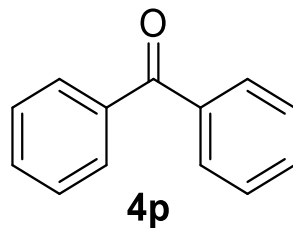

|                        |                     |
|------------------------|---------------------|
| Title                  | Rebenjiatong. 2. 1  |
| Origin                 | Bruker BioSpin GmbH |
| Owner                  | nmrsu               |
| Spectrometer           | spect               |
| Solvent                | CDC13               |
| Temperature            | 298. 0              |
| Pulse Sequence         | zgpg30              |
| Experiment             | 1D                  |
| Number of Scans        | 1024                |
| Receiver Gain          | 202                 |
| Relaxation Delay       | 2. 0000             |
| Pulse Width            | 10. 5800            |
| Acquisition Time       | 1. 3631             |
| Acquisition Date       | 2021-03-05T21:42:19 |
| Modification Date      | 2021-03-05T21:42:20 |
| Spectrometer Frequency | 100. 62             |
| Spectral Width         | 24038. 5            |
| Lowest Frequency       | -1949. 5            |
| Nucleus                | 13C                 |
| Acquired Size          | 32768               |
| Spectral Size          | 65536               |

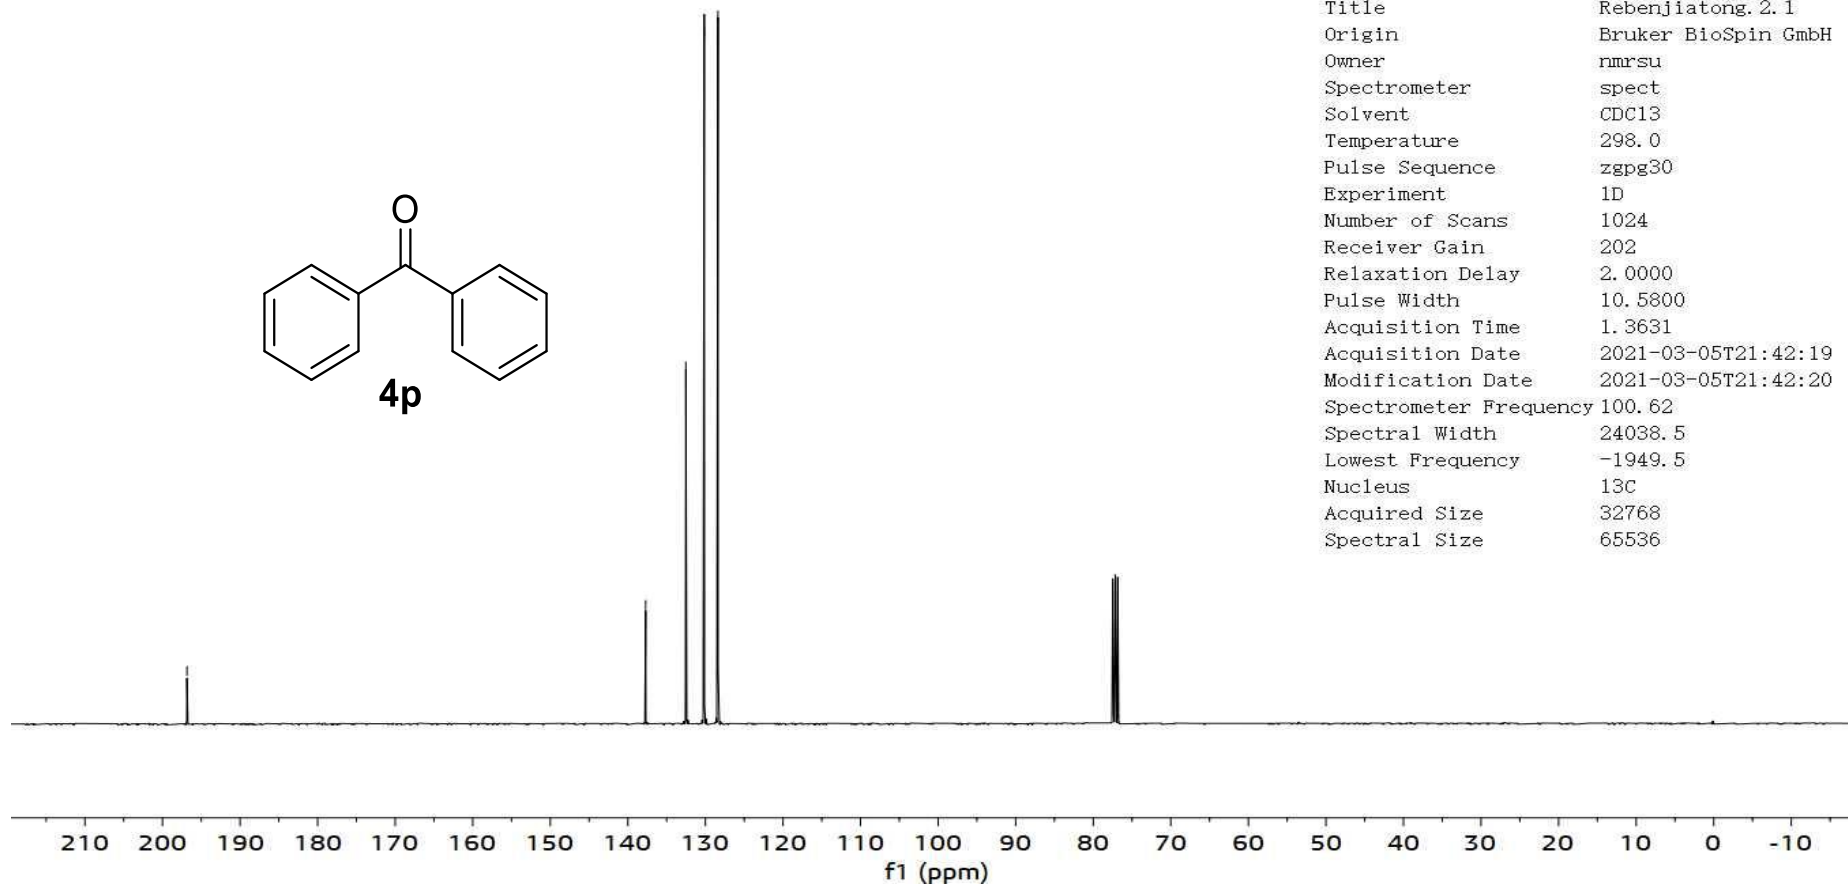

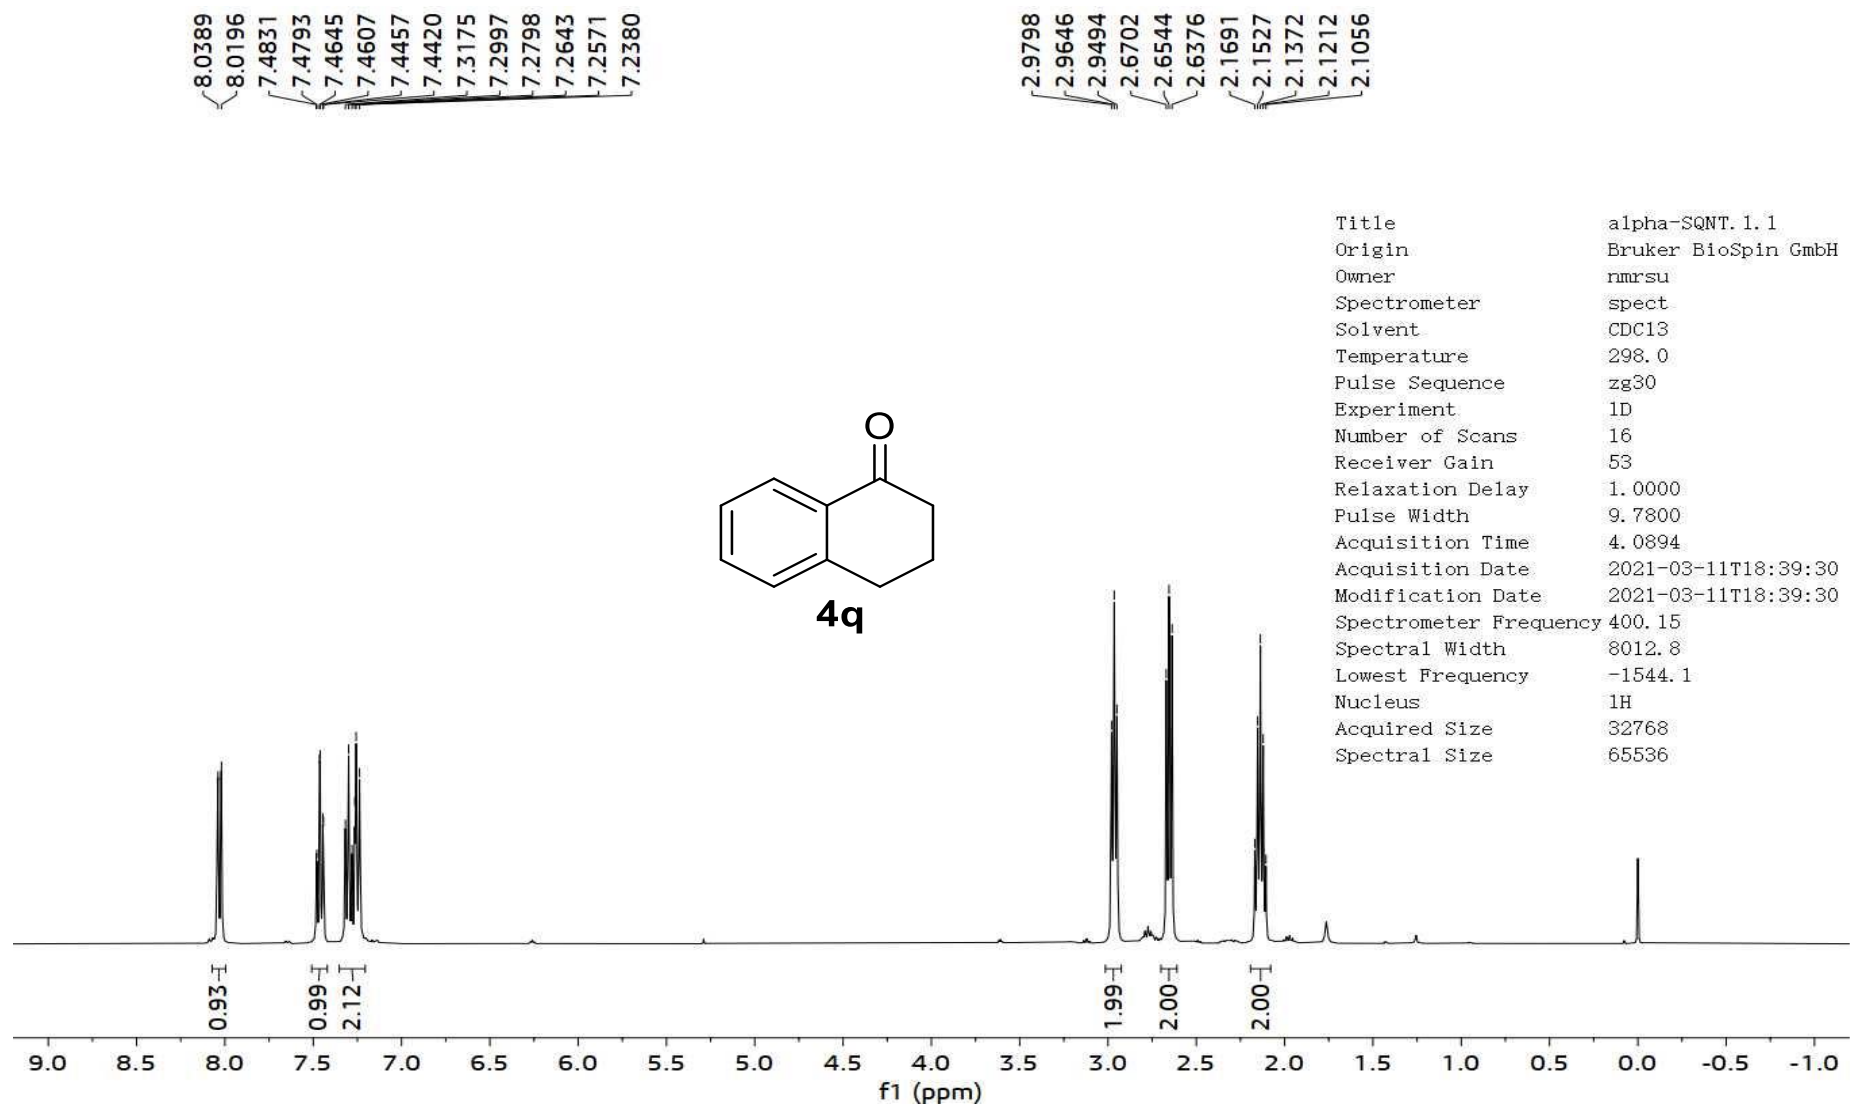

```

Title          alpha-SQNT. 1. 1
Origin         Bruker BioSpin GmbH
Owner          nmrsu
Spectrometer   spect
Solvent        CDC13
Temperature    298.0
Pulse Sequence zg30
Experiment     1D
Number of Scans 16
Receiver Gain  53
Relaxation Delay 1.0000
Pulse Width    9.7800
Acquisition Time 4.0894
Acquisition Date 2021-03-11T18:39:30
Modification Date 2021-03-11T18:39:30
Spectrometer Frequency 400.15
Spectral Width 8012.8
Lowest Frequency -1544.1
Nucleus        1H
Acquired Size  32768
Spectral Size   65536
  
```

-198.48

-144.59

133.49

132.72

128.87

127.26

126.72

-39.27

-29.81

-23.39

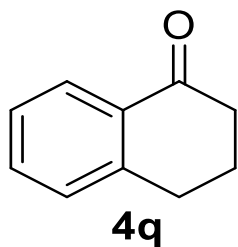

|                        |                     |
|------------------------|---------------------|
| Title                  | alpha-SQNT. 2.1     |
| Origin                 | Bruker BioSpin GmbH |
| Owner                  | rmrsu               |
| Spectrometer           | spect               |
| Solvent                | CDCl3               |
| Temperature            | 298.0               |
| Pulse Sequence         | zgpg30              |
| Experiment             | 1D                  |
| Number of Scans        | 512                 |
| Receiver Gain          | 202                 |
| Relaxation Delay       | 2.0000              |
| Pulse Width            | 10.5800             |
| Acquisition Time       | 1.3631              |
| Acquisition Date       | 2021-03-11T19:09:57 |
| Modification Date      | 2021-03-11T19:09:57 |
| Spectrometer Frequency | 100.62              |
| Spectral Width         | 24038.5             |
| Lowest Frequency       | -1948.8             |
| Nucleus                | 13C                 |
| Acquired Size          | 32768               |
| Spectral Size          | 65536               |

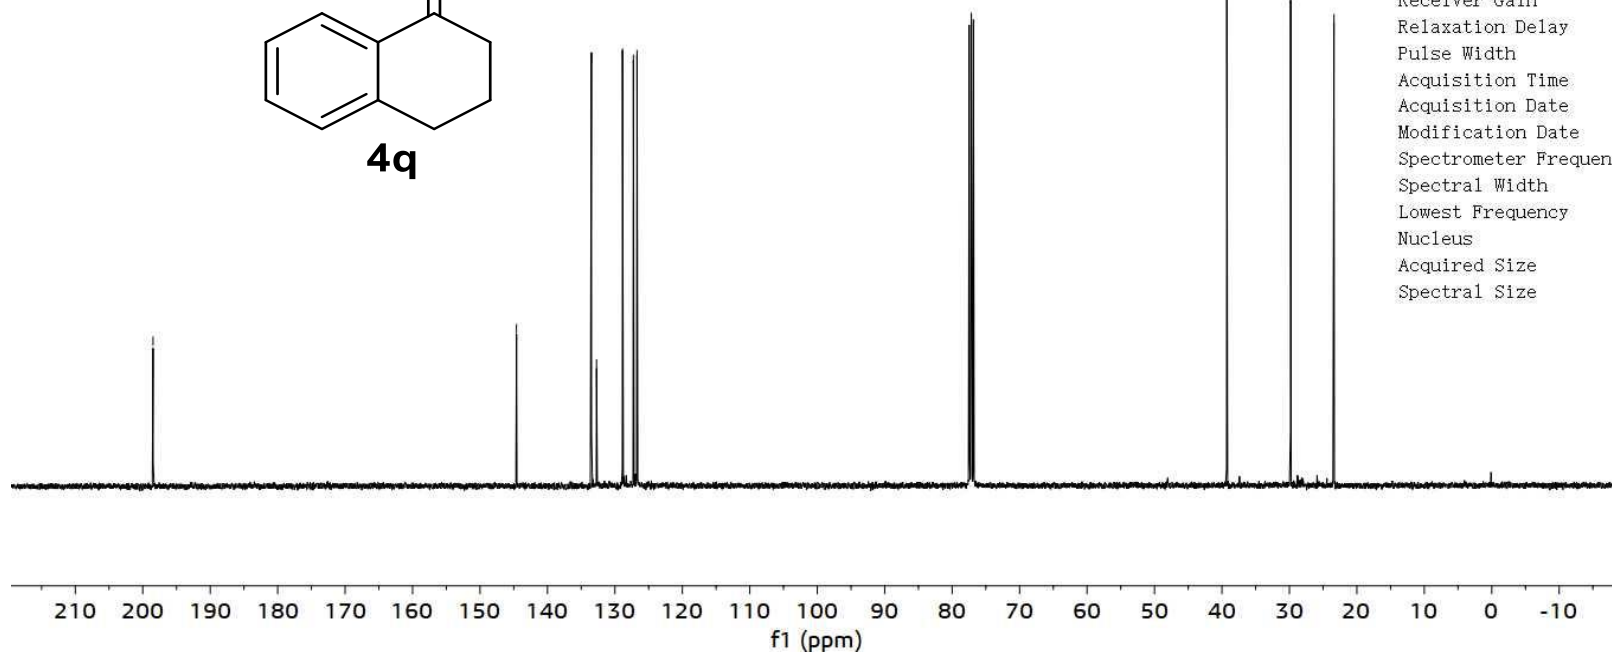

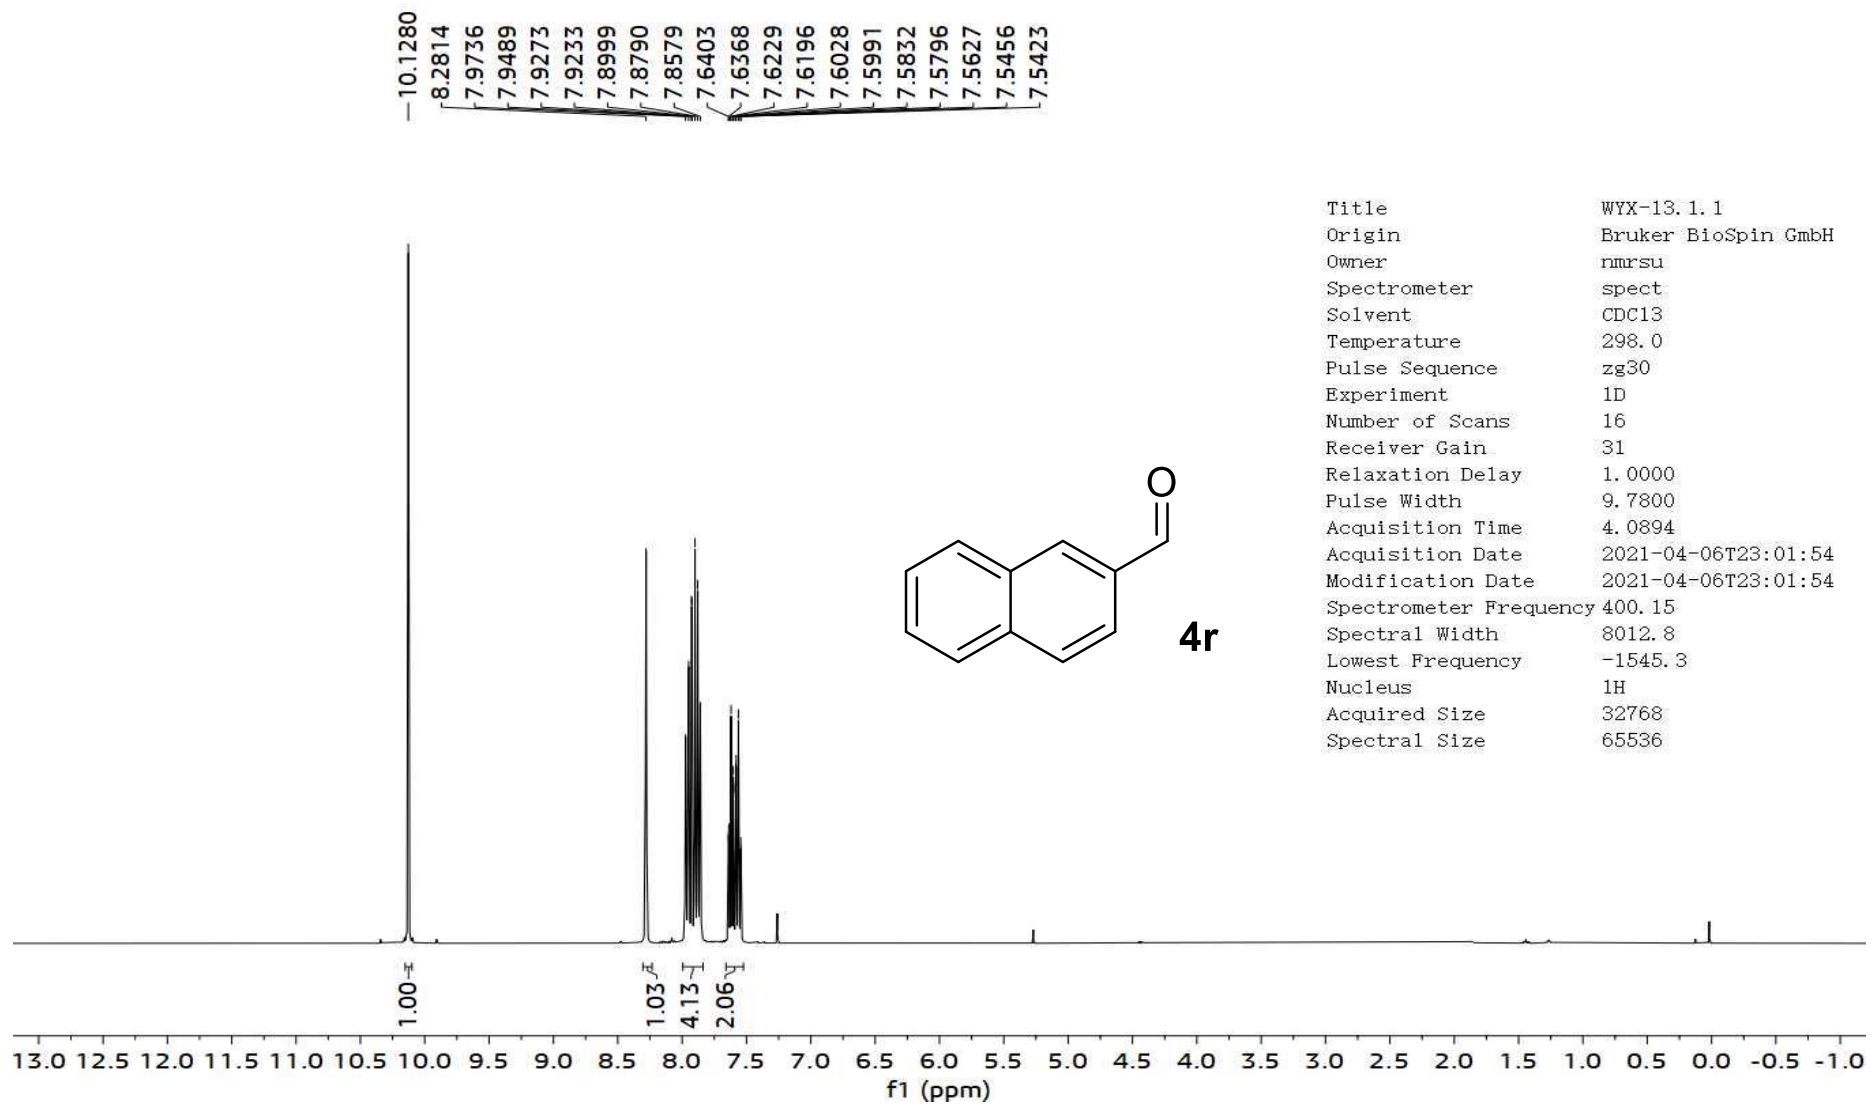

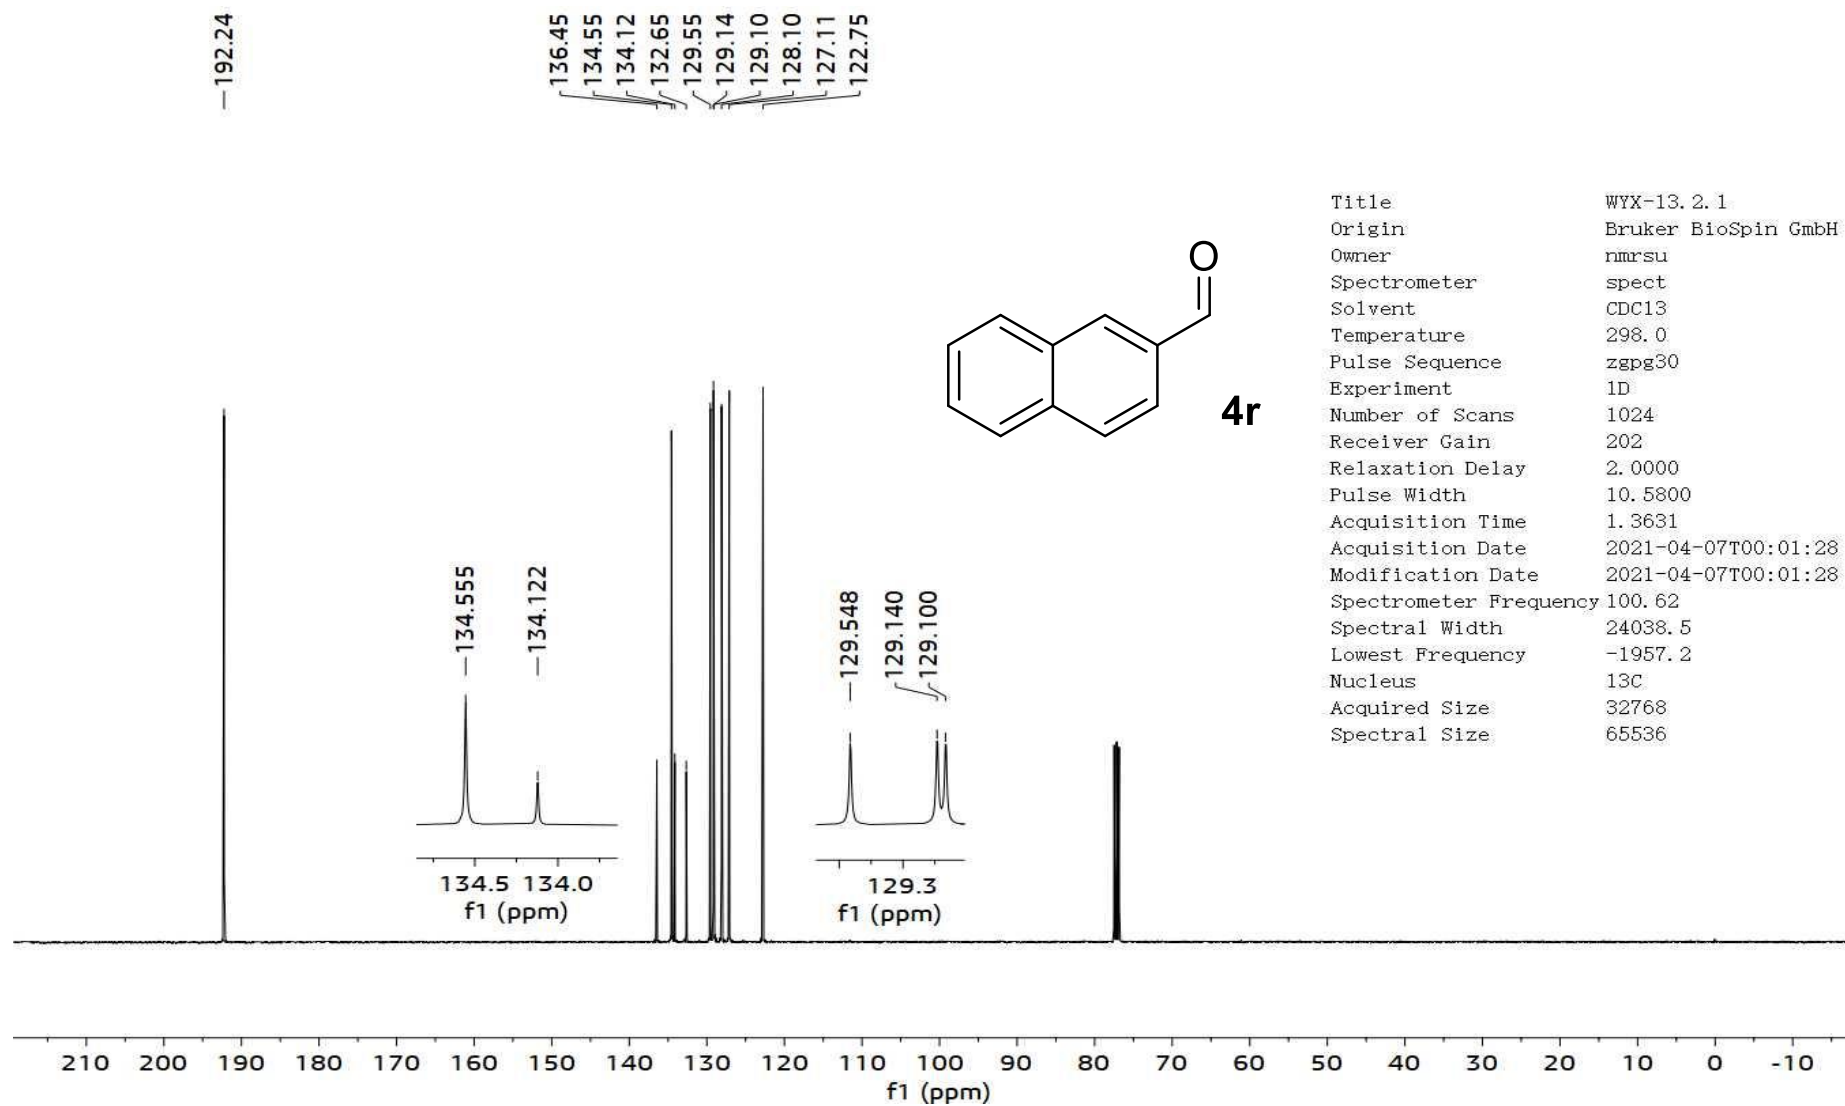

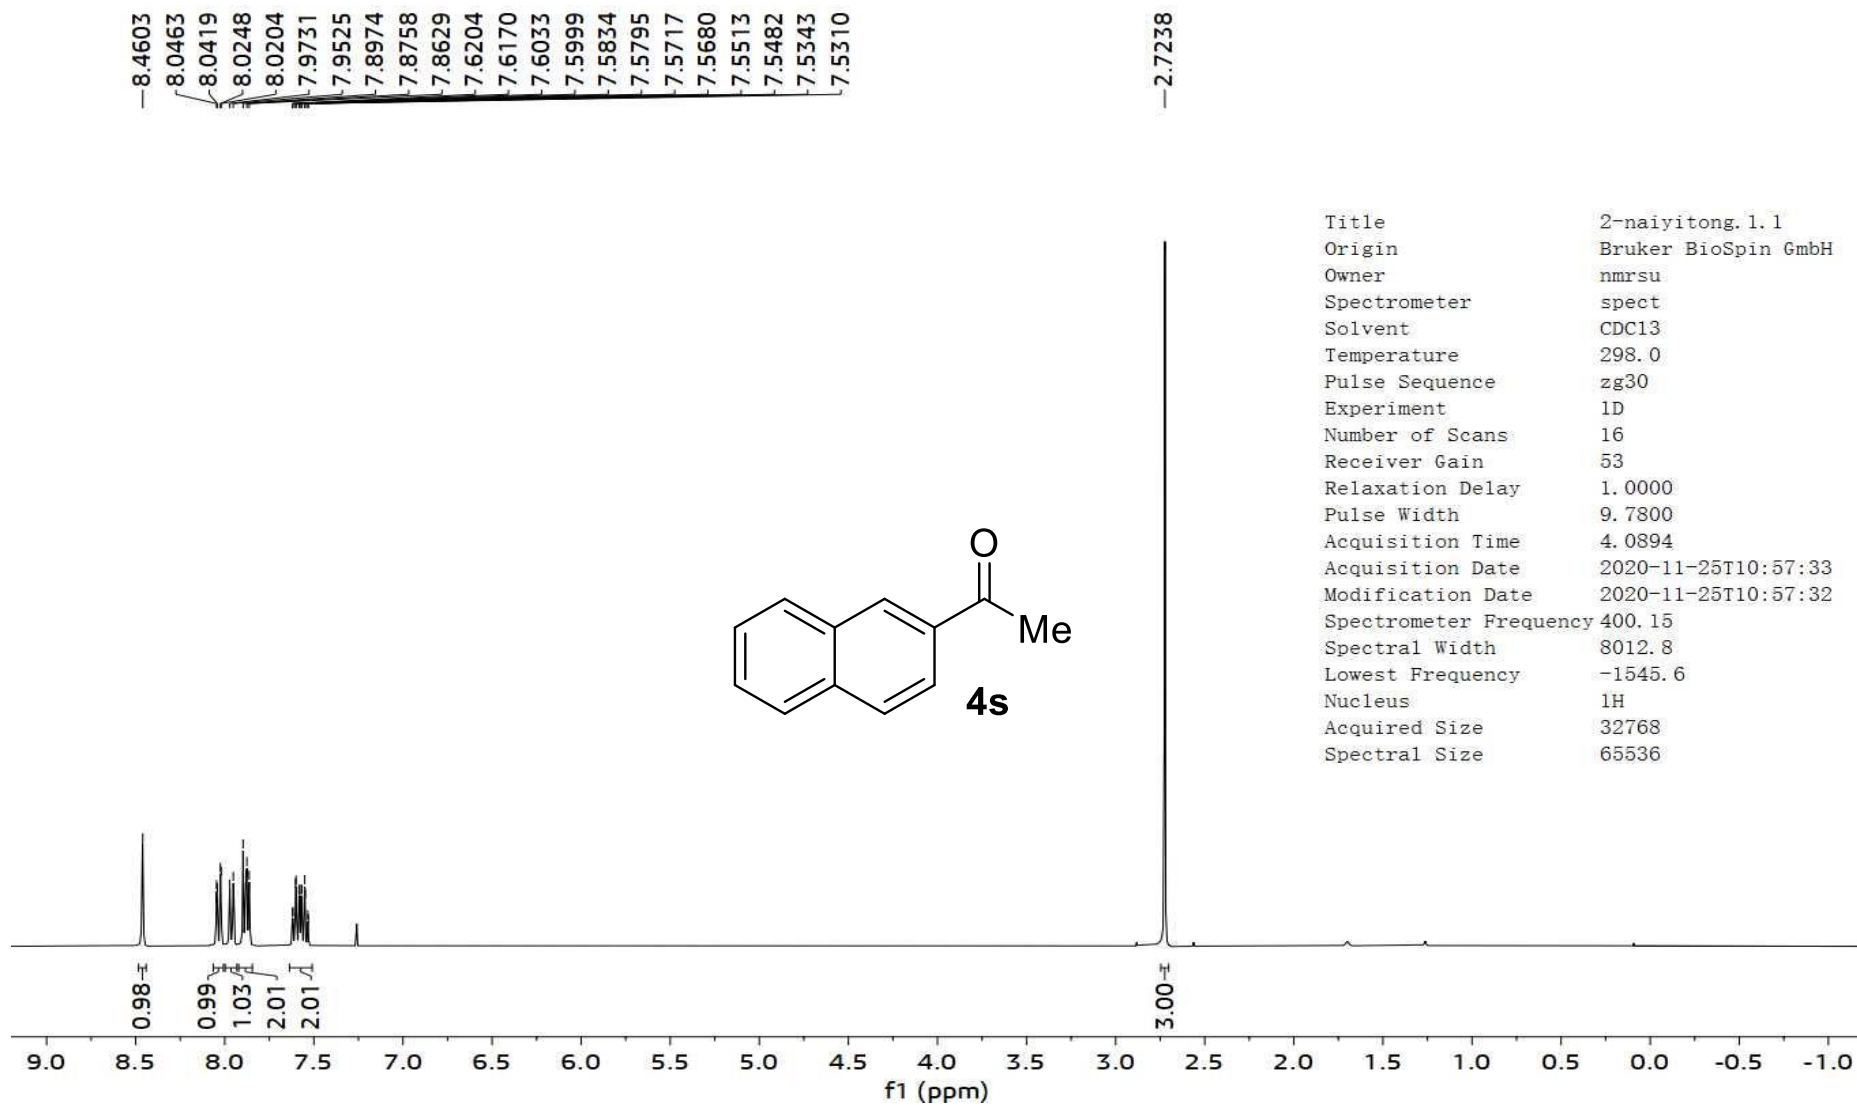



—198.20

135.70  
134.61  
132.63  
130.30  
129.66  
128.58  
128.53  
127.89  
126.88  
124.01

—26.79

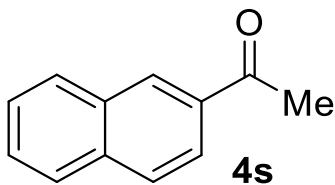

|                        |                     |
|------------------------|---------------------|
| Title                  | 2-naiyitong. 2. 1   |
| Origin                 | Bruker BioSpin GmbH |
| Owner                  | nrsu                |
| Spectrometer           | spect               |
| Solvent                | CDCl3               |
| Temperature            | 298.0               |
| Pulse Sequence         | zgpg30              |
| Experiment             | 1D                  |
| Number of Scans        | 400                 |
| Receiver Gain          | 202                 |
| Relaxation Delay       | 2.0000              |
| Pulse Width            | 10.5800             |
| Acquisition Time       | 1.3631              |
| Acquisition Date       | 2020-11-25T11:21:34 |
| Modification Date      | 2020-11-25T11:21:34 |
| Spectrometer Frequency | 100.62              |
| Spectral Width         | 24038.5             |
| Lowest Frequency       | -1948.7             |
| Nucleus                | 13C                 |
| Acquired Size          | 32768               |
| Spectral Size          | 65536               |

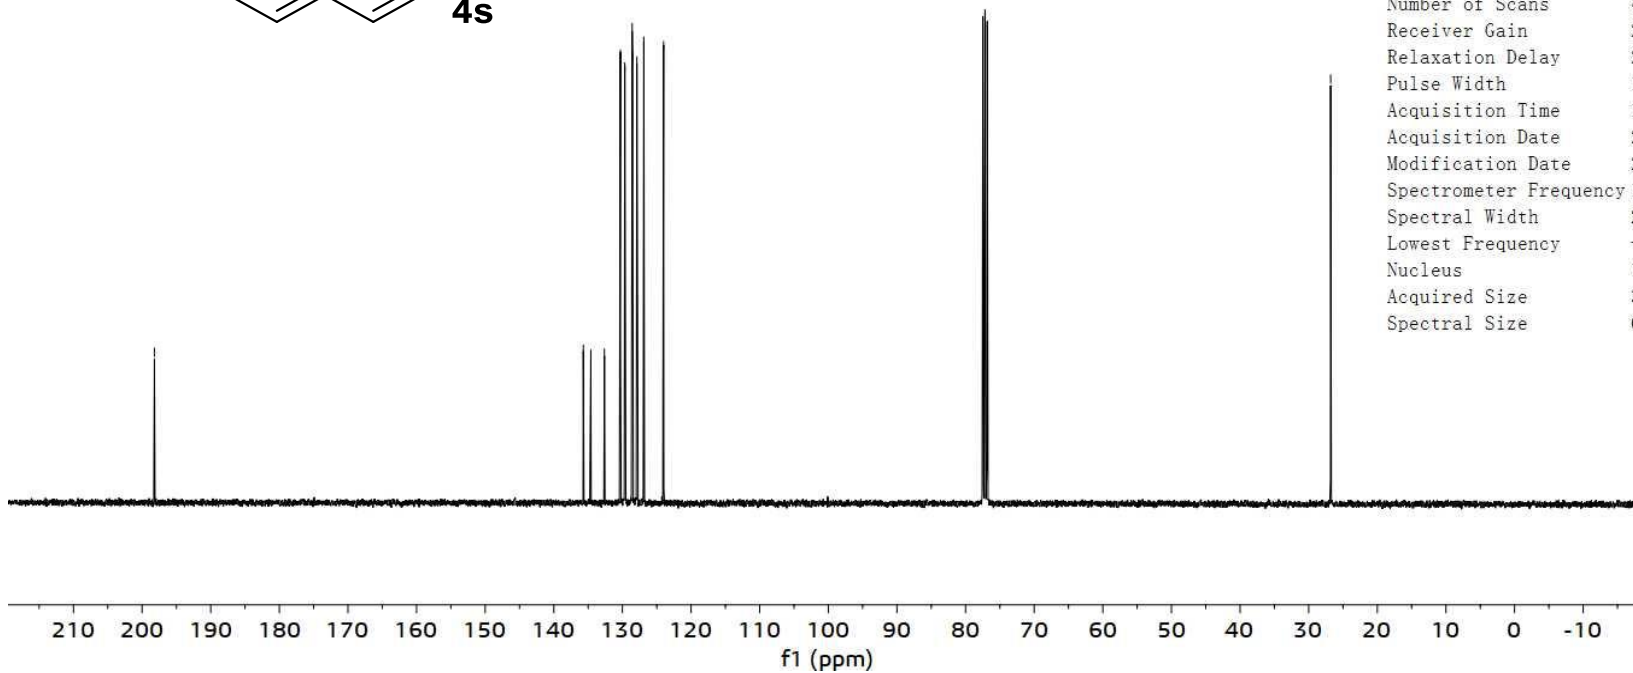

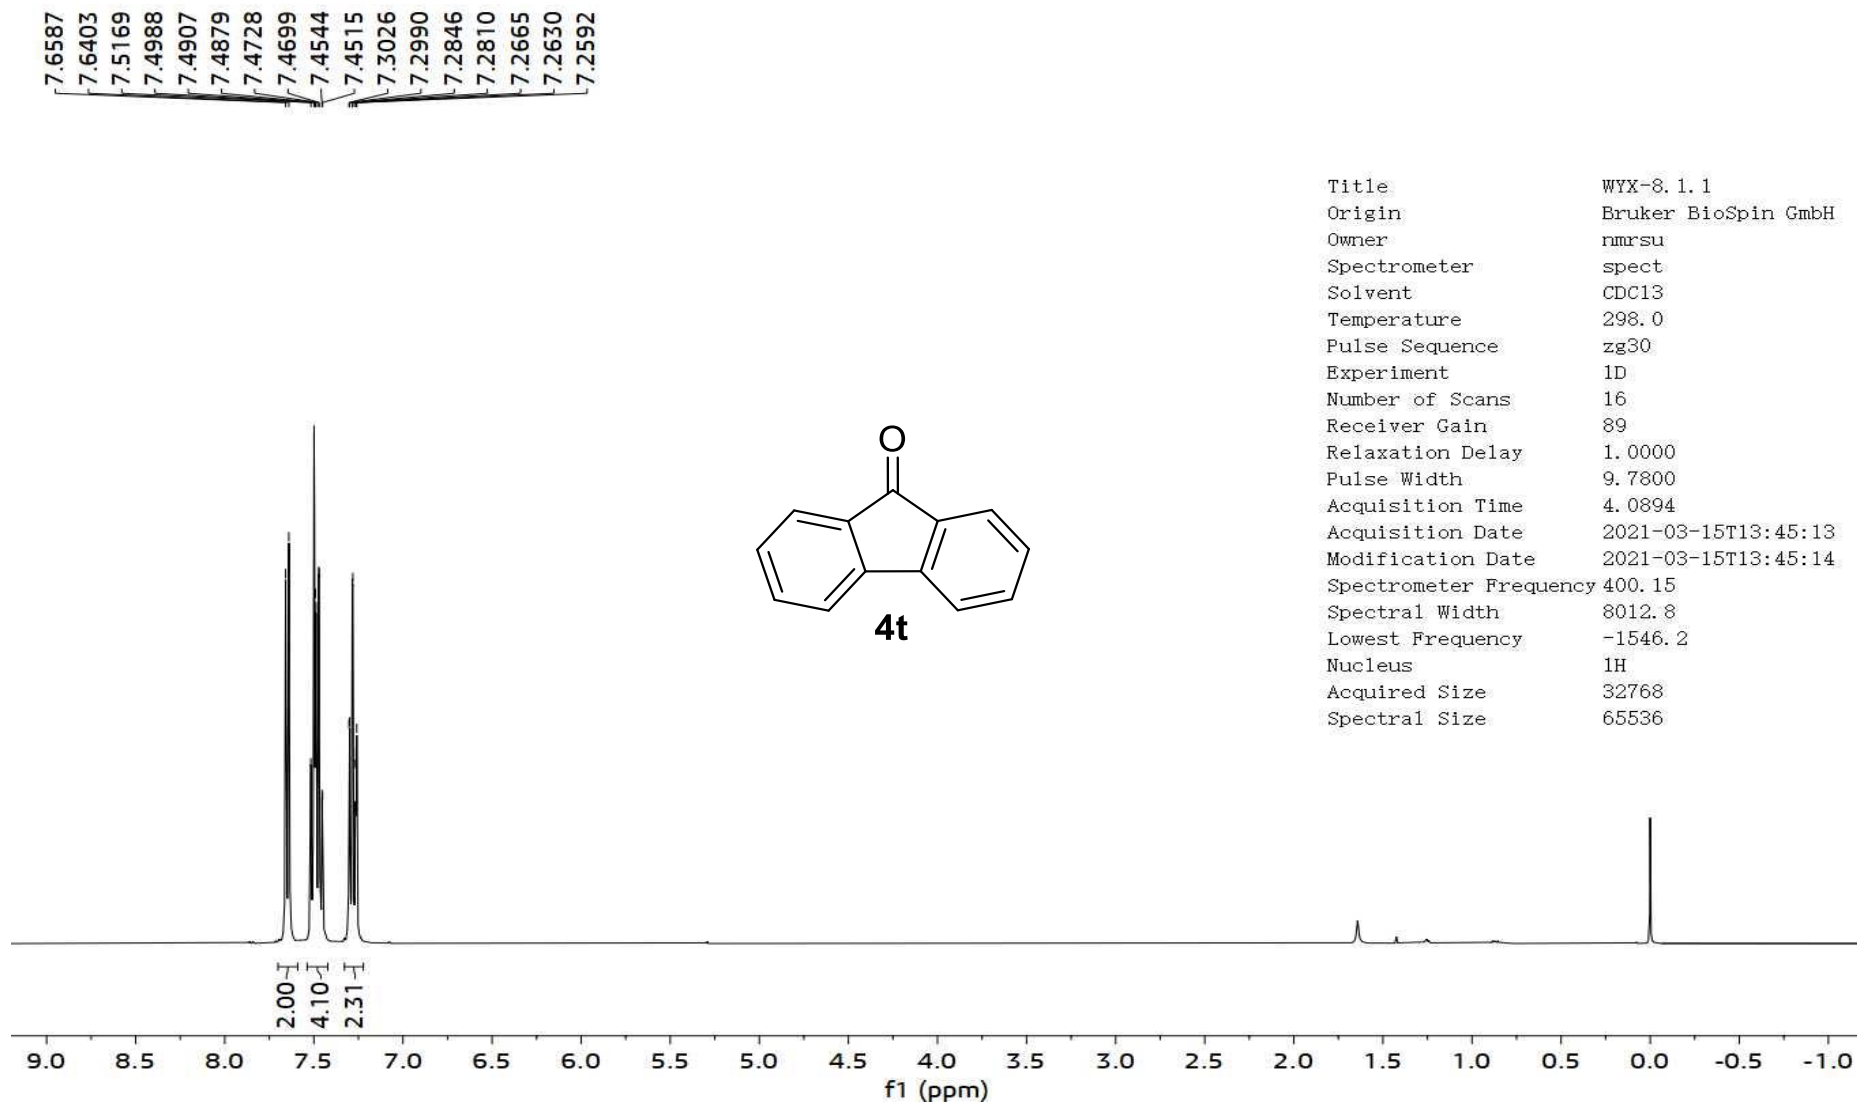

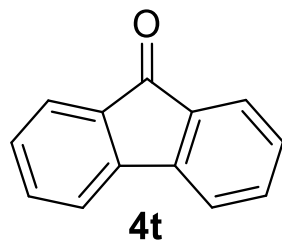

4t

—194.03

—144.55

134.80

134.28

129.20

124.43

120.43

134.804

134.277

135.0 134.5 134.0  
f1 (ppm)

|                        |                     |
|------------------------|---------------------|
| Title                  | WYX-8.2.1           |
| Origin                 | Bruker BioSpin GmbH |
| Owner                  | nmrsu               |
| Spectrometer           | spect               |
| Solvent                | CDC13               |
| Temperature            | 298.0               |
| Pulse Sequence         | zpg30               |
| Experiment             | 1D                  |
| Number of Scans        | 582                 |
| Receiver Gain          | 202                 |
| Relaxation Delay       | 2.0000              |
| Pulse Width            | 10.5800             |
| Acquisition Time       | 1.3631              |
| Acquisition Date       | 2021-03-15T14:19:39 |
| Modification Date      | 2021-03-15T14:19:42 |
| Spectrometer Frequency | 100.62              |
| Spectral Width         | 24038.5             |
| Lowest Frequency       | -1946.6             |
| Nucleus                | 13C                 |
| Acquired Size          | 32768               |
| Spectral Size          | 65536               |

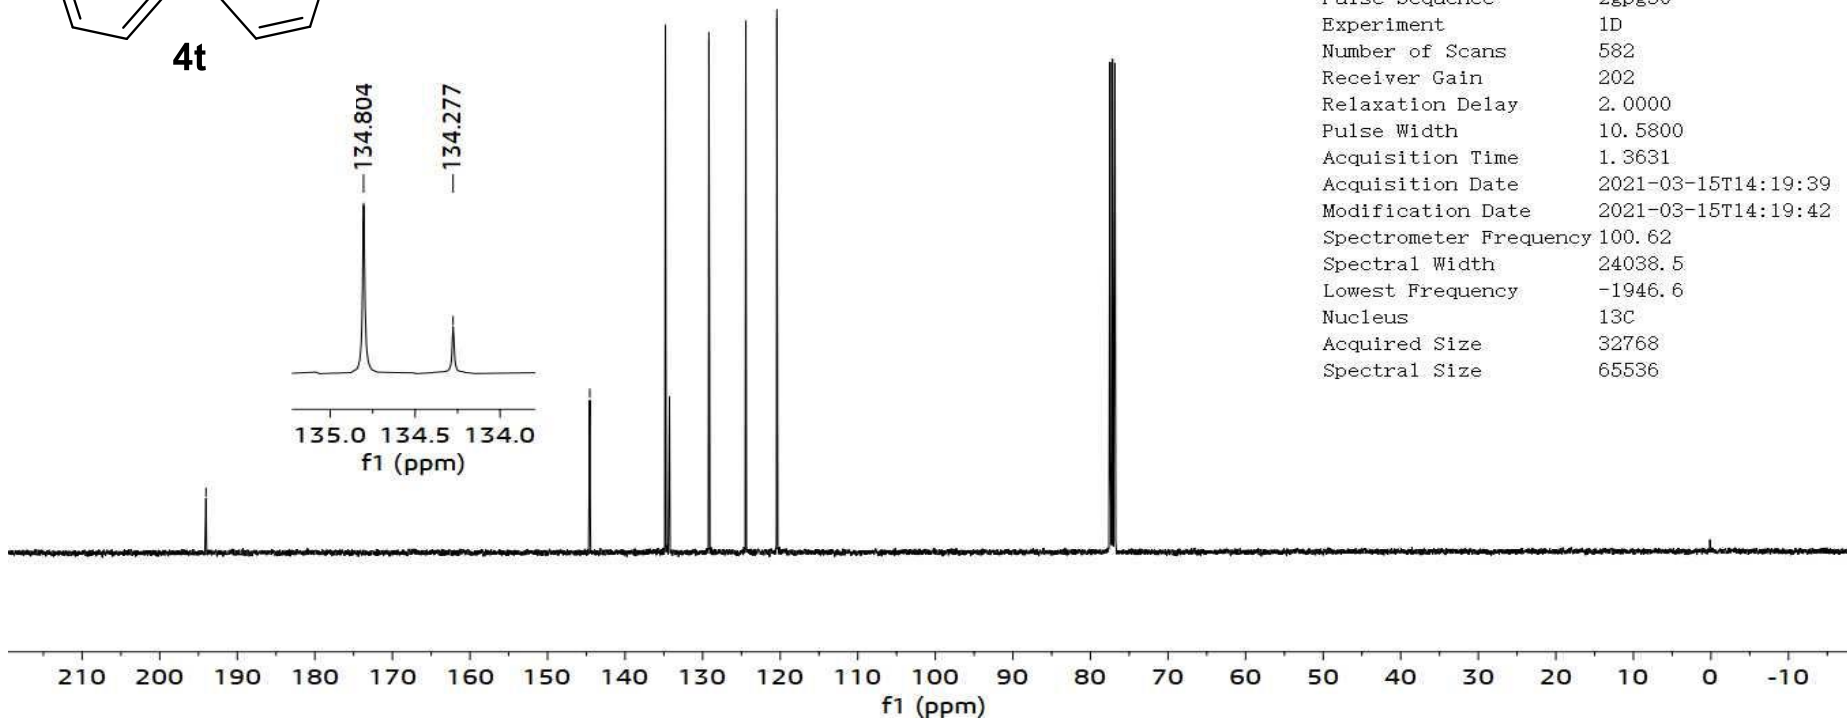

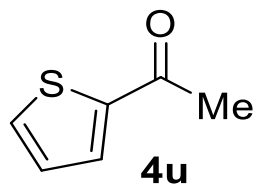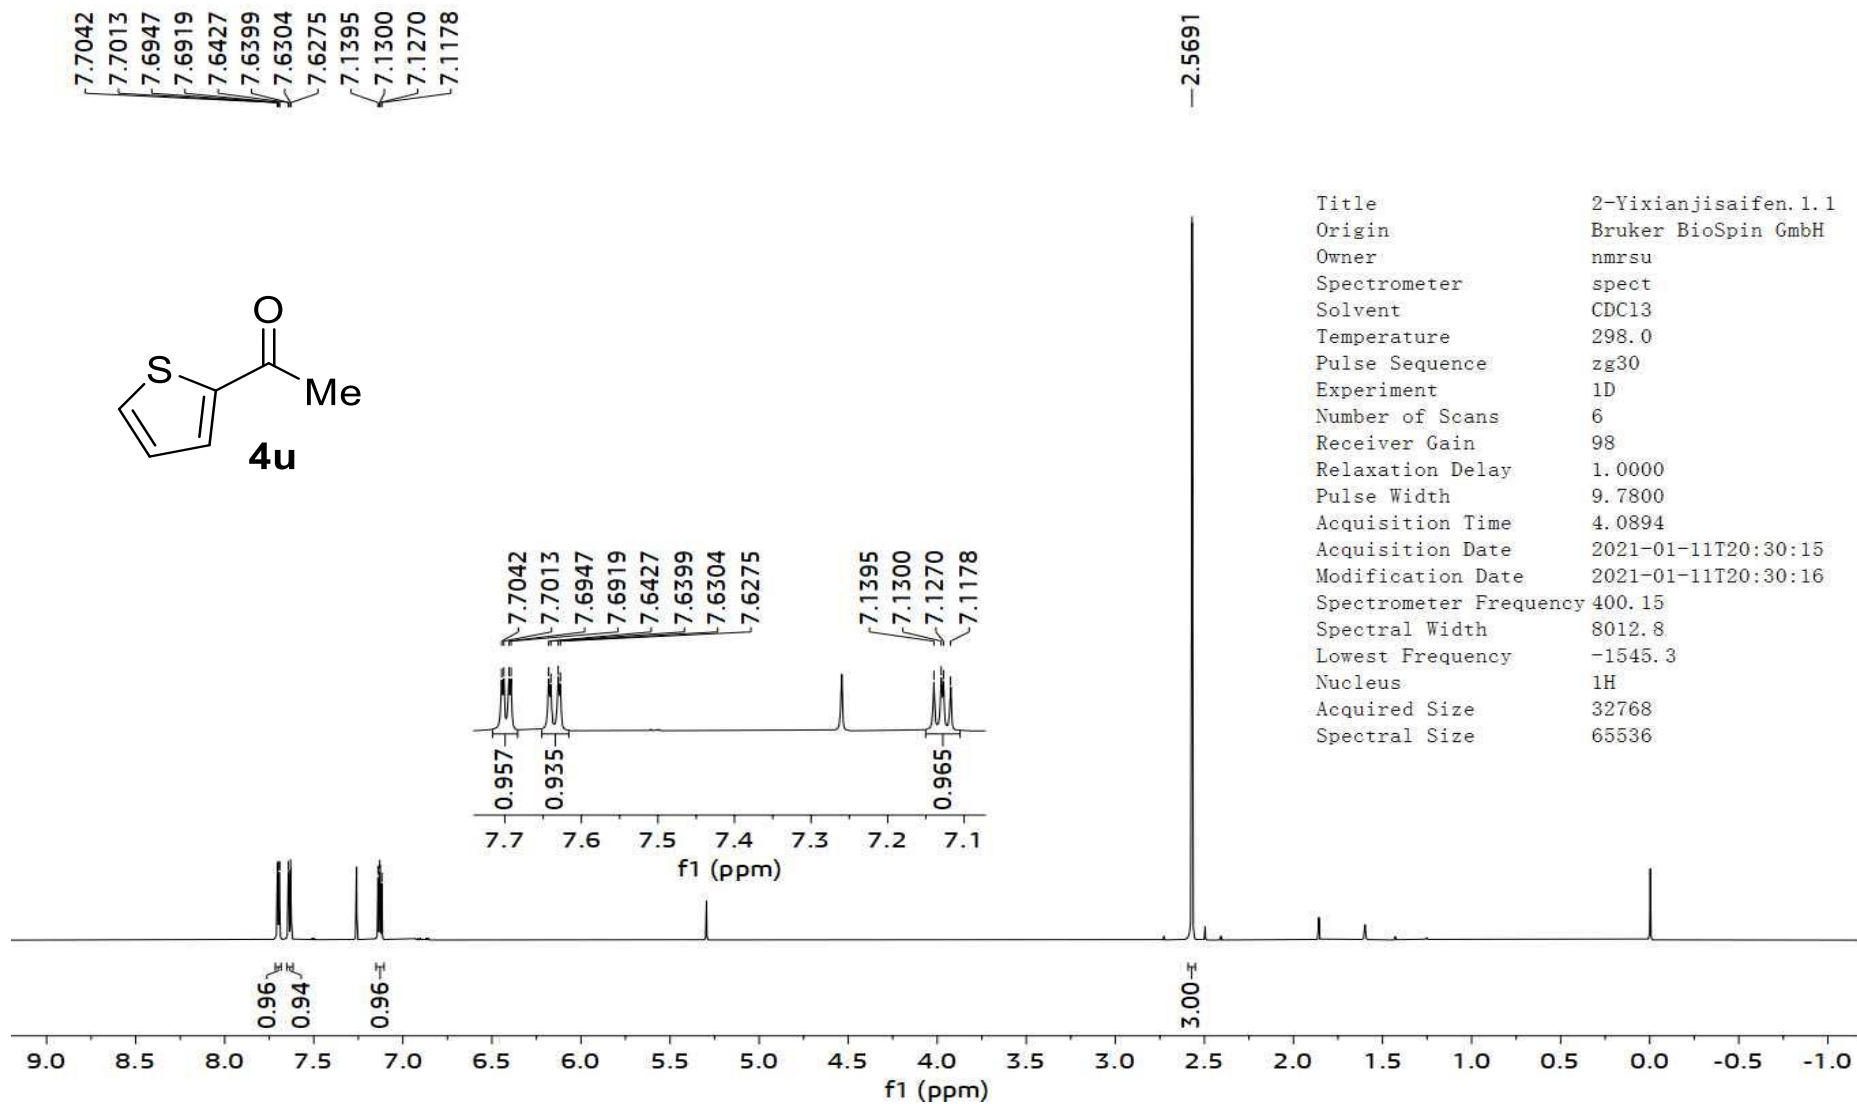

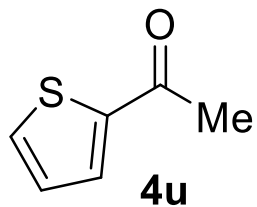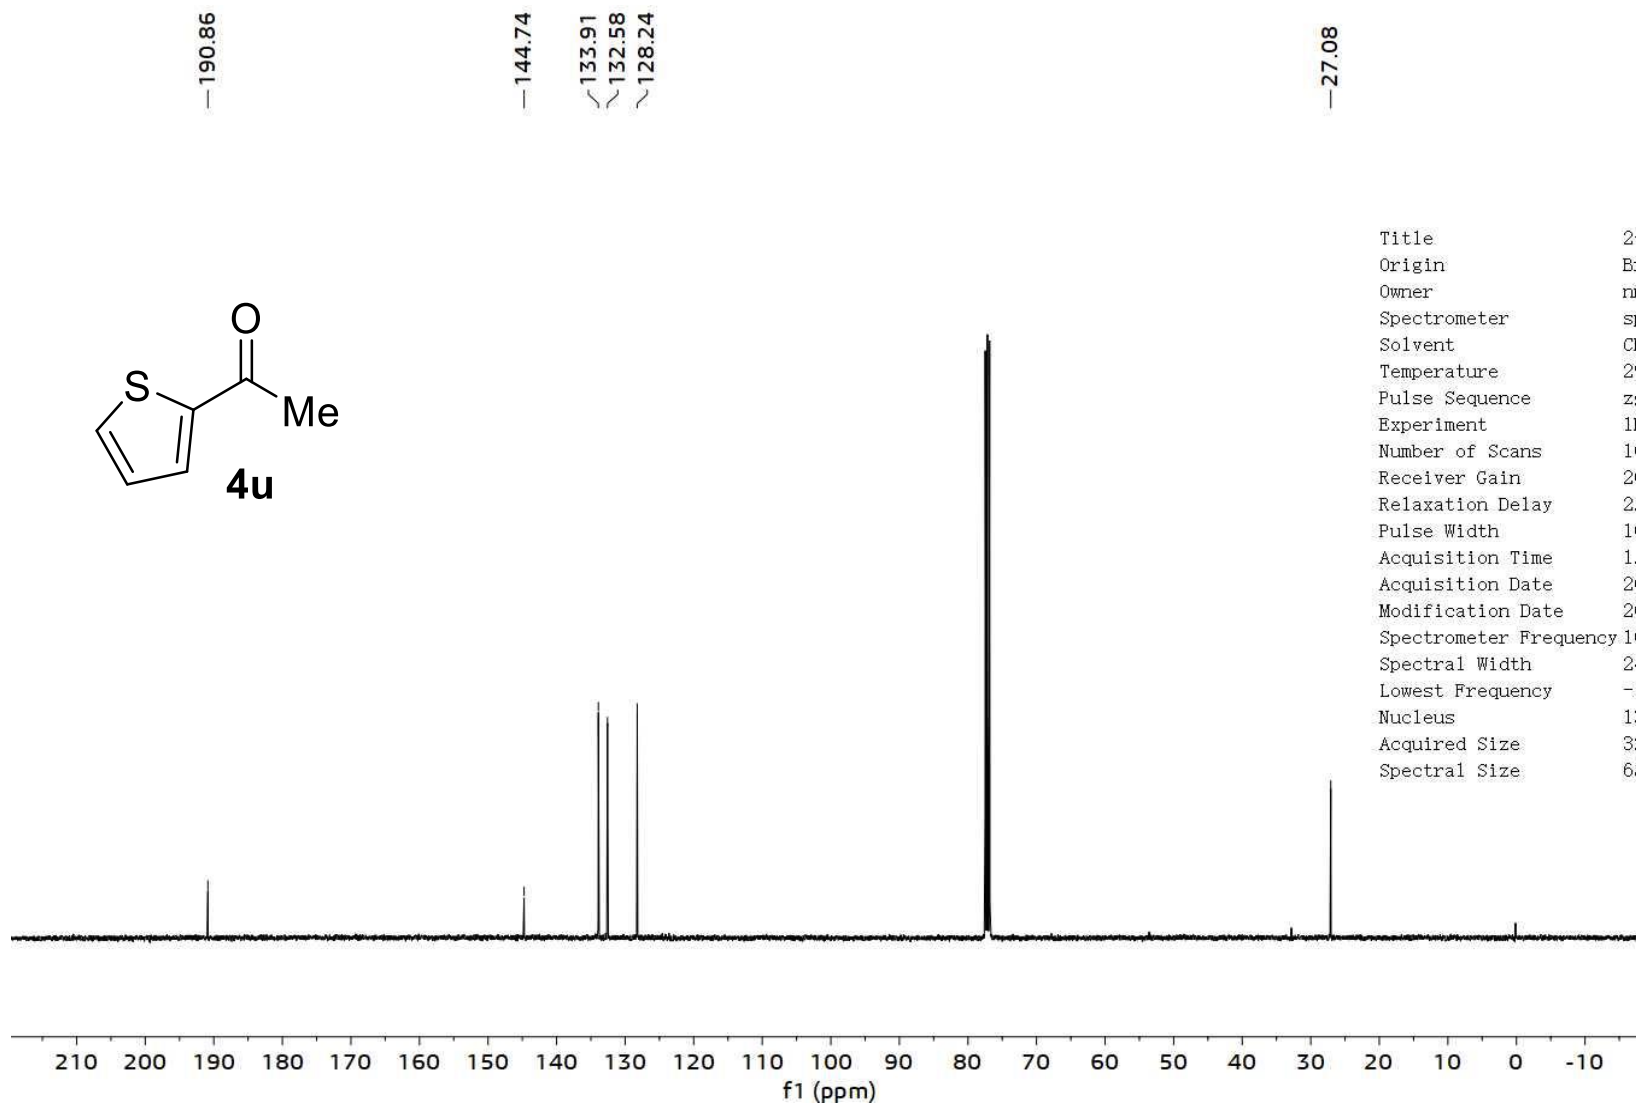

|                        |                       |
|------------------------|-----------------------|
| Title                  | 2-Yixianjisaifen. 2.1 |
| Origin                 | Bruker BioSpin GmbH   |
| Owner                  | nmrsu                 |
| Spectrometer           | spect                 |
| Solvent                | CDCl3                 |
| Temperature            | 298.0                 |
| Pulse Sequence         | zgpg30                |
| Experiment             | 1D                    |
| Number of Scans        | 1024                  |
| Receiver Gain          | 202                   |
| Relaxation Delay       | 2.0000                |
| Pulse Width            | 10.5800               |
| Acquisition Time       | 1.3631                |
| Acquisition Date       | 2021-01-11T21:29:50   |
| Modification Date      | 2021-01-11T21:29:52   |
| Spectrometer Frequency | 100.62                |
| Spectral Width         | 24038.5               |
| Lowest Frequency       | -1944.7               |
| Nucleus                | 13C                   |
| Acquired Size          | 32768                 |
| Spectral Size          | 65536                 |

7.8704  
7.8675  
7.8637  
7.8553  
7.8500  
7.8462  
7.7180  
7.7151  
7.7058  
7.7029  
7.6441  
7.6411  
7.6346  
7.6317  
7.6044  
7.6010  
7.5977  
7.5881  
7.5825  
7.5773  
7.5674  
7.5640  
7.5606  
7.5068  
7.4874  
7.4694  
7.1634  
7.1540  
7.1510  
7.1416

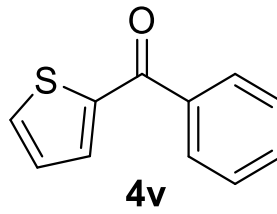

|                        |                     |
|------------------------|---------------------|
| Title                  | WYX-20.1.1          |
| Origin                 | Bruker BioSpin GmbH |
| Owner                  | nmrsu               |
| Spectrometer           | spect               |
| Solvent                | CDC13               |
| Temperature            | 298.0               |
| Pulse Sequence         | zg30                |
| Experiment             | 1D                  |
| Number of Scans        | 6                   |
| Receiver Gain          | 31                  |
| Relaxation Delay       | 1.0000              |
| Pulse Width            | 9.7800              |
| Acquisition Time       | 4.0894              |
| Acquisition Date       | 2021-04-20T19:20:30 |
| Modification Date      | 2021-04-20T19:20:32 |
| Spectrometer Frequency | 400.15              |
| Spectral Width         | 8012.8              |
| Lowest Frequency       | -1545.5             |
| Nucleus                | <sup>1</sup> H      |
| Acquired Size          | 32768               |
| Spectral Size          | 65536               |

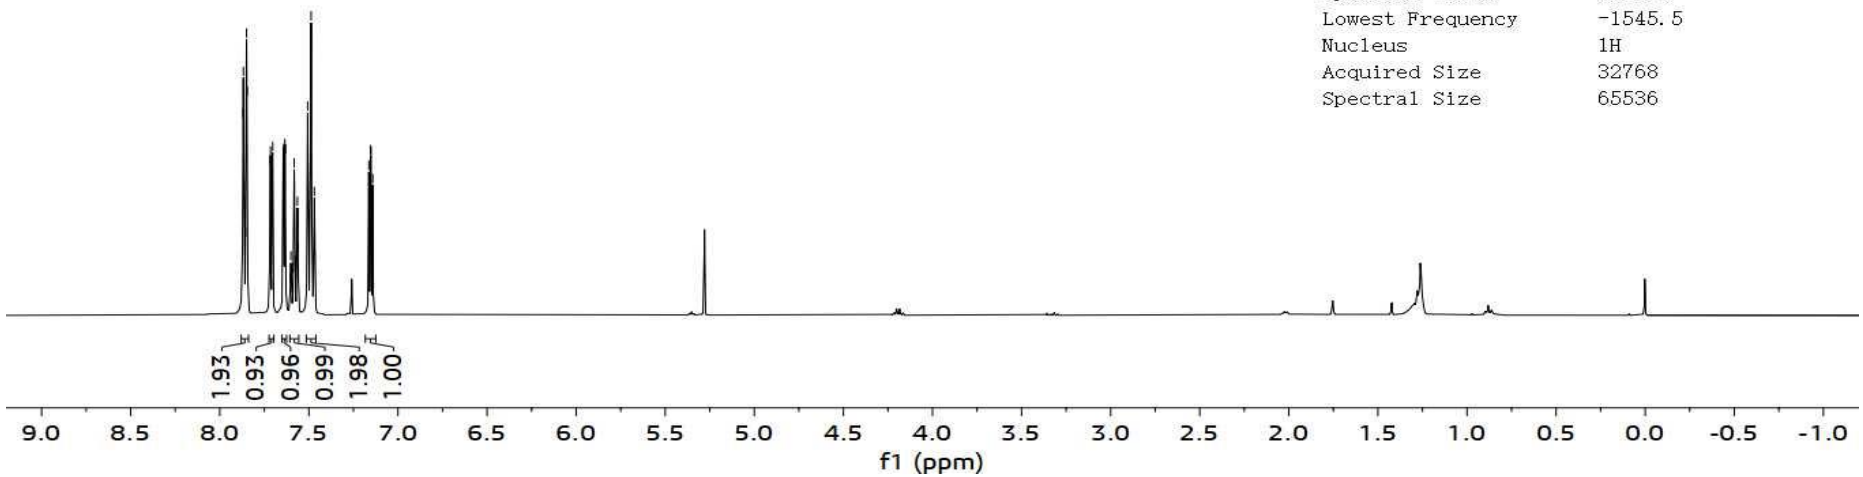

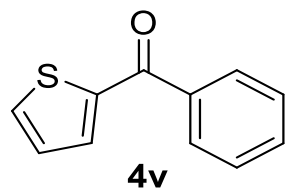

— 188.29

143.70  
 138.22  
 134.94  
 134.30  
 132.35  
 129.24  
 128.50  
 128.06

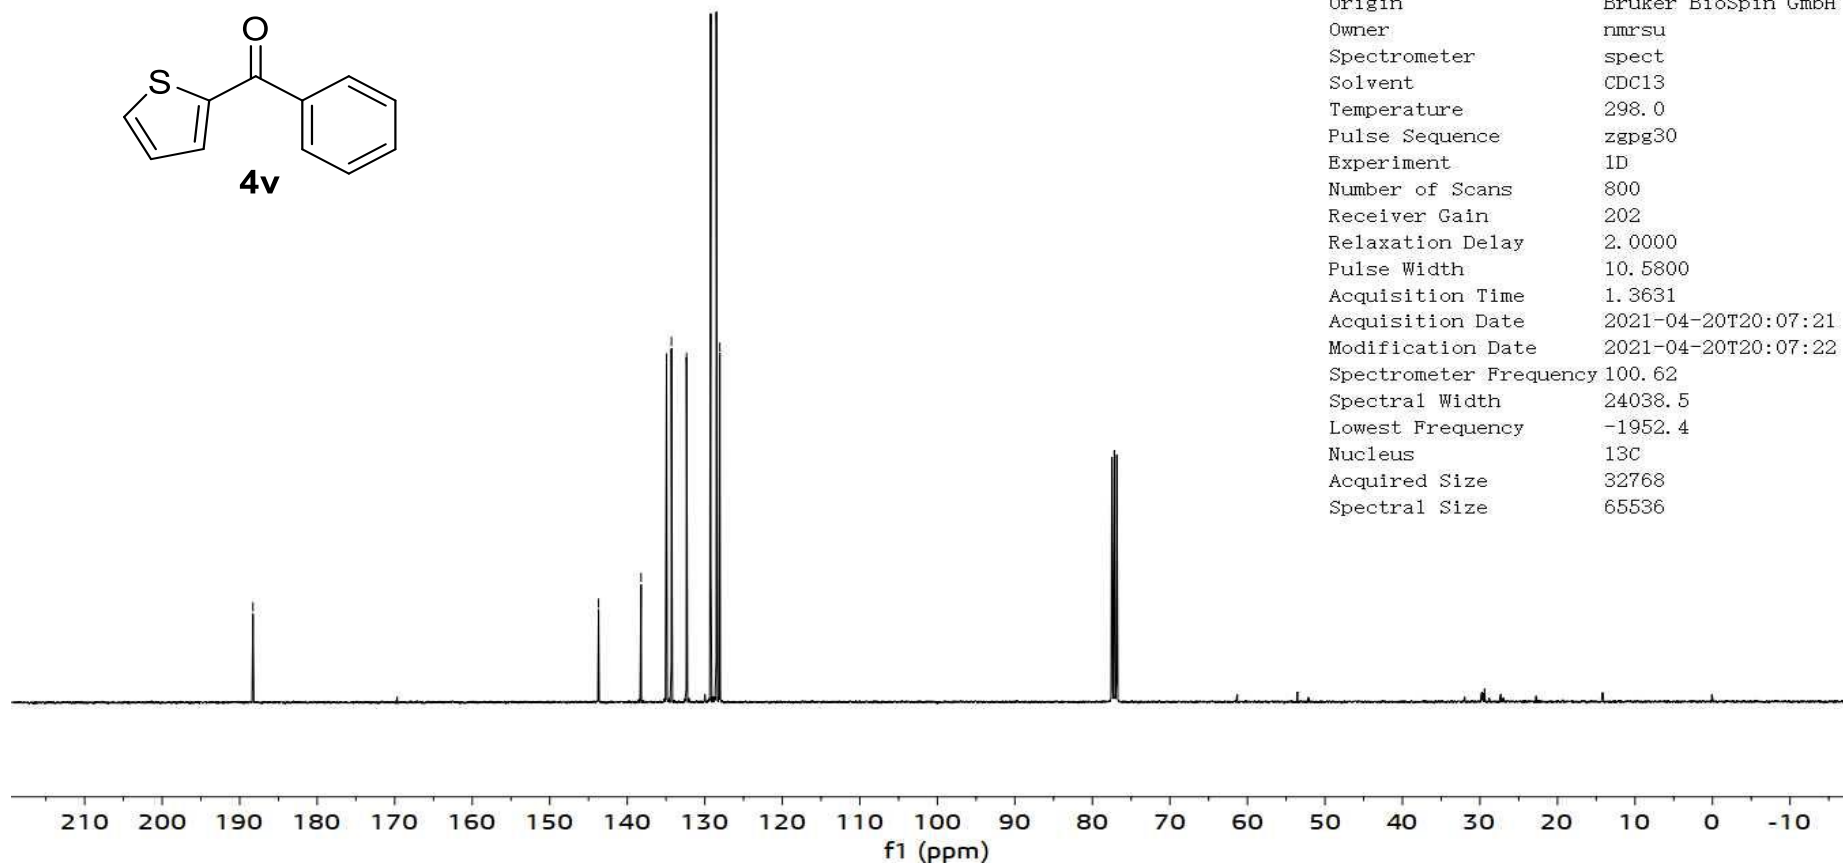

|                        |                     |
|------------------------|---------------------|
| Title                  | WYX-20. 2. 1        |
| Origin                 | Bruker BioSpin GmbH |
| Owner                  | nmrsu               |
| Spectrometer           | spect               |
| Solvent                | CDC13               |
| Temperature            | 298. 0              |
| Pulse Sequence         | zgpg30              |
| Experiment             | 1D                  |
| Number of Scans        | 800                 |
| Receiver Gain          | 202                 |
| Relaxation Delay       | 2. 0000             |
| Pulse Width            | 10. 5800            |
| Acquisition Time       | 1. 3631             |
| Acquisition Date       | 2021-04-20T20:07:21 |
| Modification Date      | 2021-04-20T20:07:22 |
| Spectrometer Frequency | 100. 62             |
| Spectral Width         | 24038. 5            |
| Lowest Frequency       | -1952. 4            |
| Nucleus                | 13C                 |
| Acquired Size          | 32768               |
| Spectral Size          | 65536               |

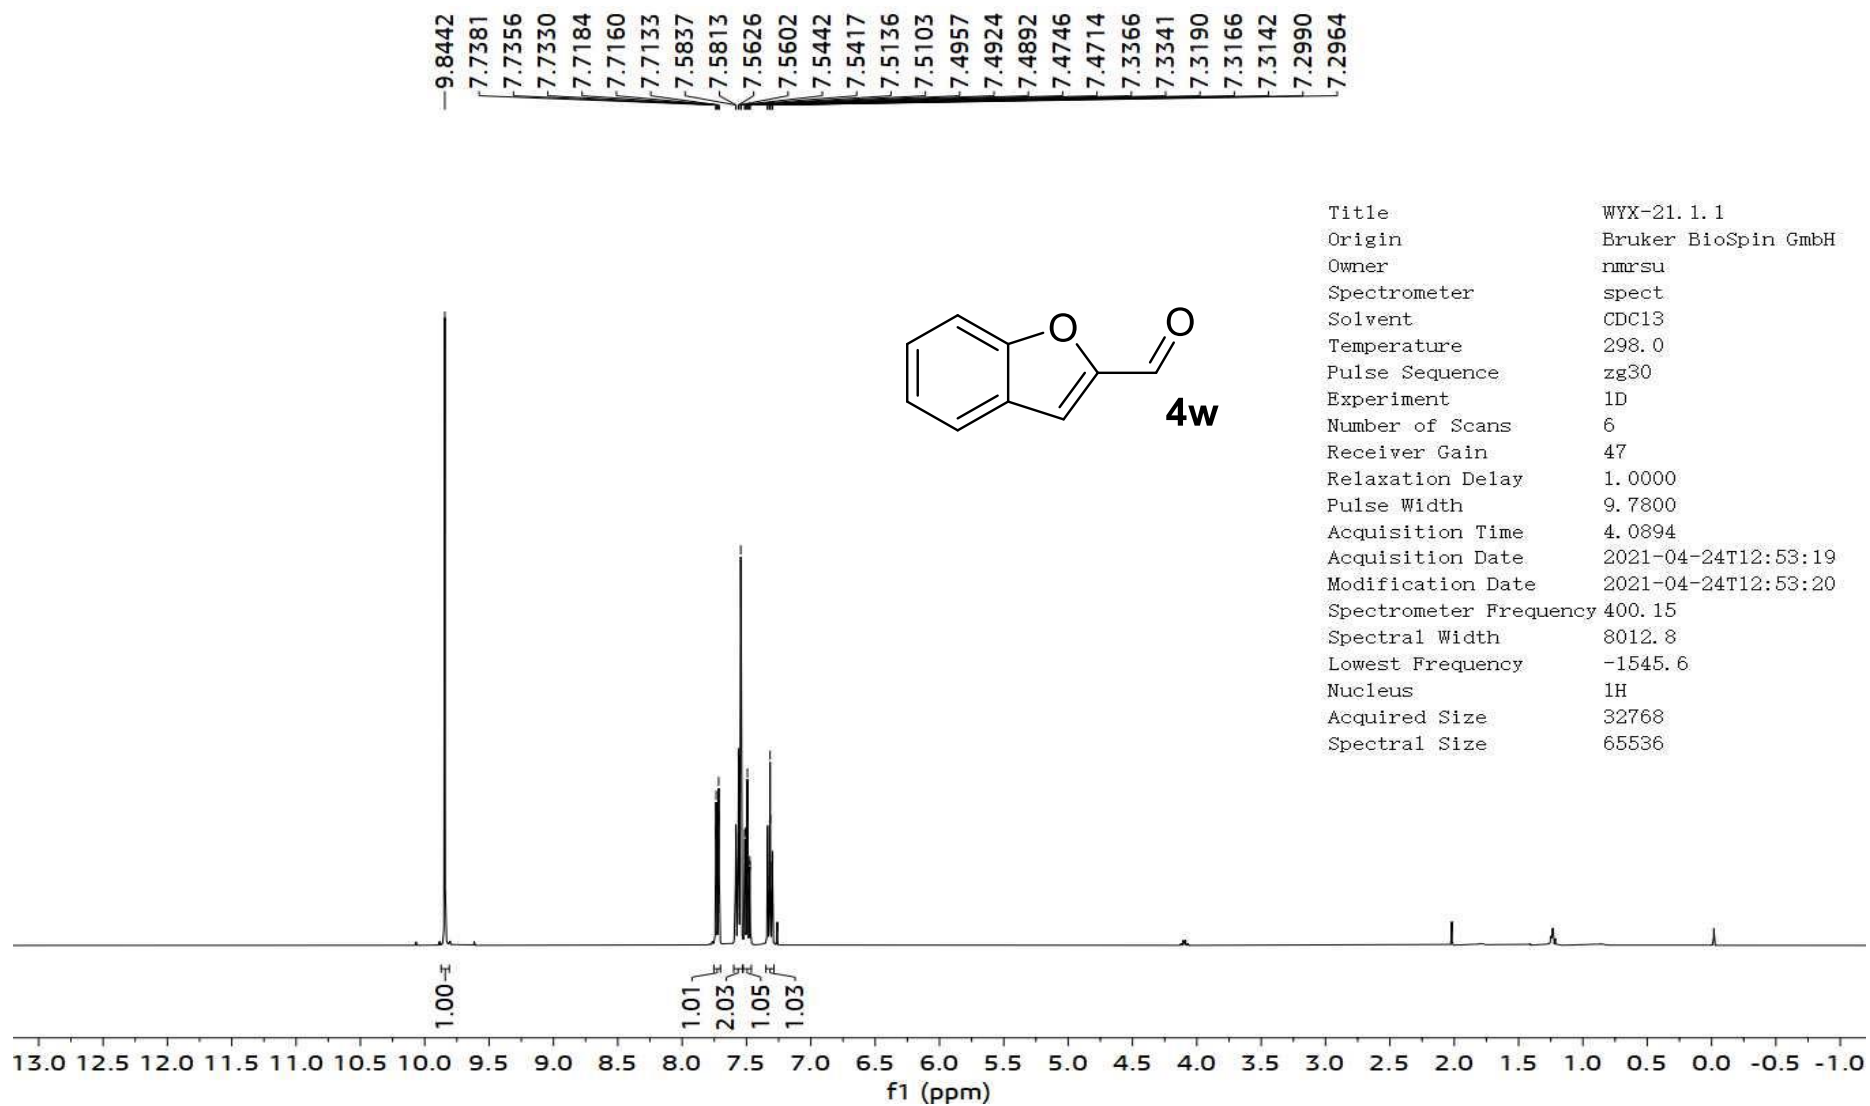



179.80  
 156.29  
 152.75  
 129.27  
 126.71  
 124.26  
 123.73  
 117.90  
 112.73

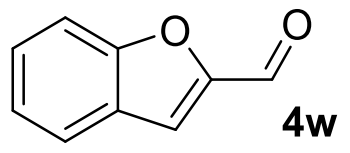

|                        |                     |
|------------------------|---------------------|
| Title                  | WYX-21. 2. 1        |
| Origin                 | Bruker BioSpin GmbH |
| Owner                  | nmsu                |
| Spectrometer           | spect               |
| Solvent                | CDC13               |
| Temperature            | 298.0               |
| Pulse Sequence         | zgpg30              |
| Experiment             | 1D                  |
| Number of Scans        | 1024                |
| Receiver Gain          | 202                 |
| Relaxation Delay       | 2.0000              |
| Pulse Width            | 10.5800             |
| Acquisition Time       | 1.3631              |
| Acquisition Date       | 2021-04-24T13:52:58 |
| Modification Date      | 2021-04-24T13:53:00 |
| Spectrometer Frequency | 100.62              |
| Spectral Width         | 24038.5             |
| Lowest Frequency       | -1953.9             |
| Nucleus                | <sup>13</sup> C     |
| Acquired Size          | 32768               |
| Spectral Size          | 65536               |

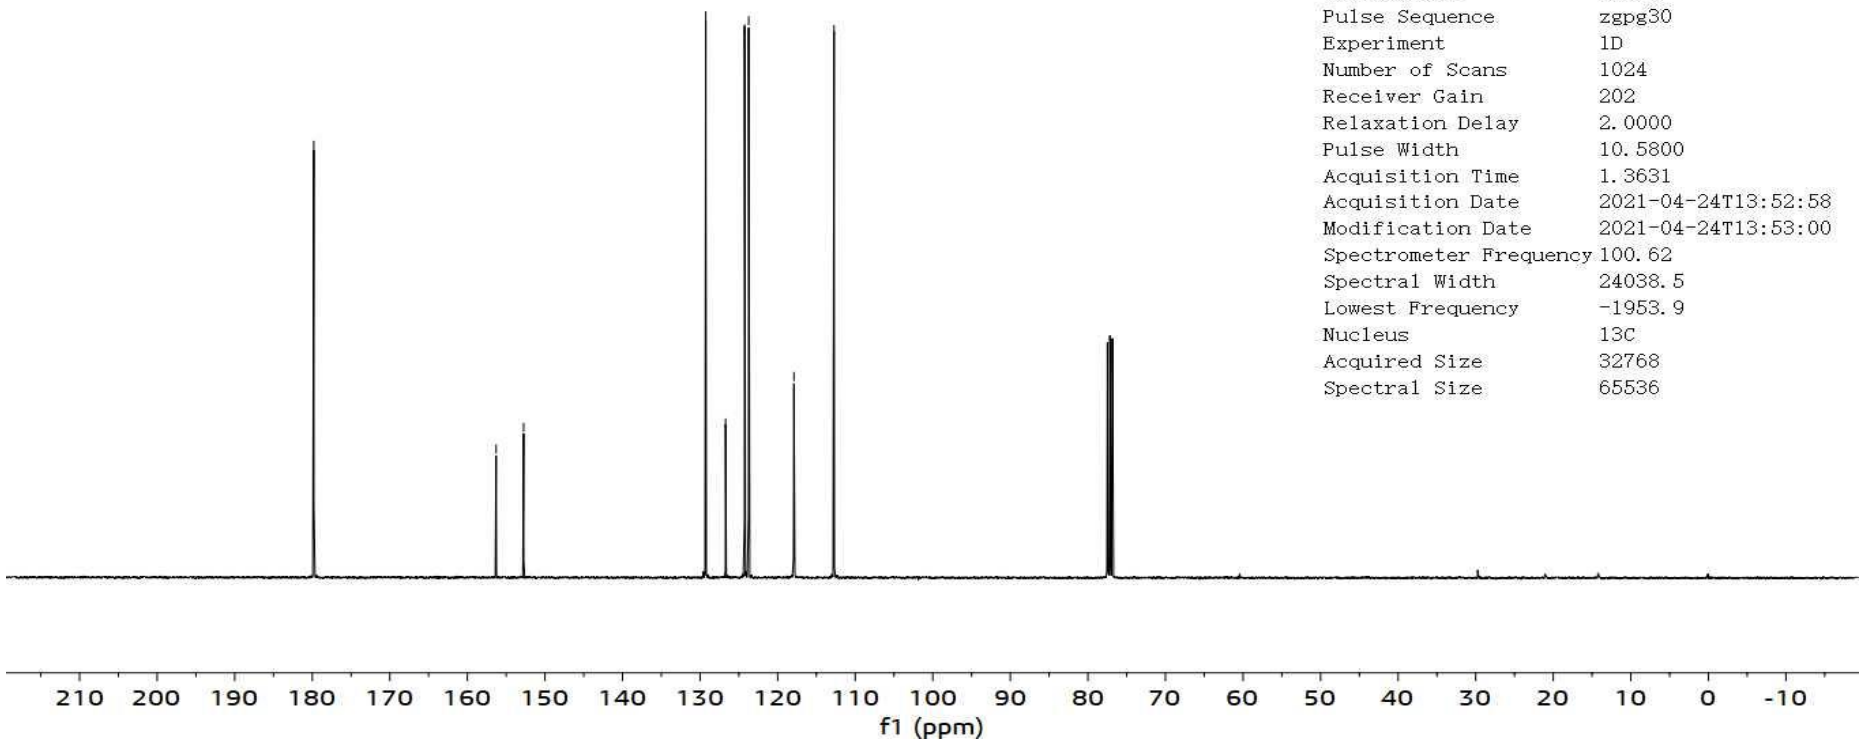

-12.1252

-9.9346

8.2832  
8.2774  
8.2686  
8.1041  
8.0840  
7.5189  
7.5017  
7.2528  
7.2338  
7.2226  
7.2078  
7.1908

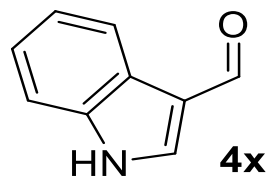

|                        |                     |
|------------------------|---------------------|
| Title                  | WYX-25YD.1.fid      |
| Origin                 | Bruker BioSpin GmbH |
| Owner                  | nmrsu               |
| Spectrometer           | spect               |
| Solvent                | DMSO                |
| Temperature            | 298.0               |
| Pulse Sequence         | zg30                |
| Experiment             | 1D                  |
| Number of Scans        | 10                  |
| Receiver Gain          | 112                 |
| Relaxation Delay       | 1.0000              |
| Pulse Width            | 9.7800              |
| Acquisition Time       | 4.0894              |
| Acquisition Date       | 2021-11-10T17:18:37 |
| Modification Date      | 2021-11-10T17:18:36 |
| Spectrometer Frequency | 400.15              |
| Spectral Width         | 8012.8              |
| Lowest Frequency       | -1537.8             |
| Nucleus                | 1H                  |
| Acquired Size          | 32768               |
| Spectral Size          | 65536               |

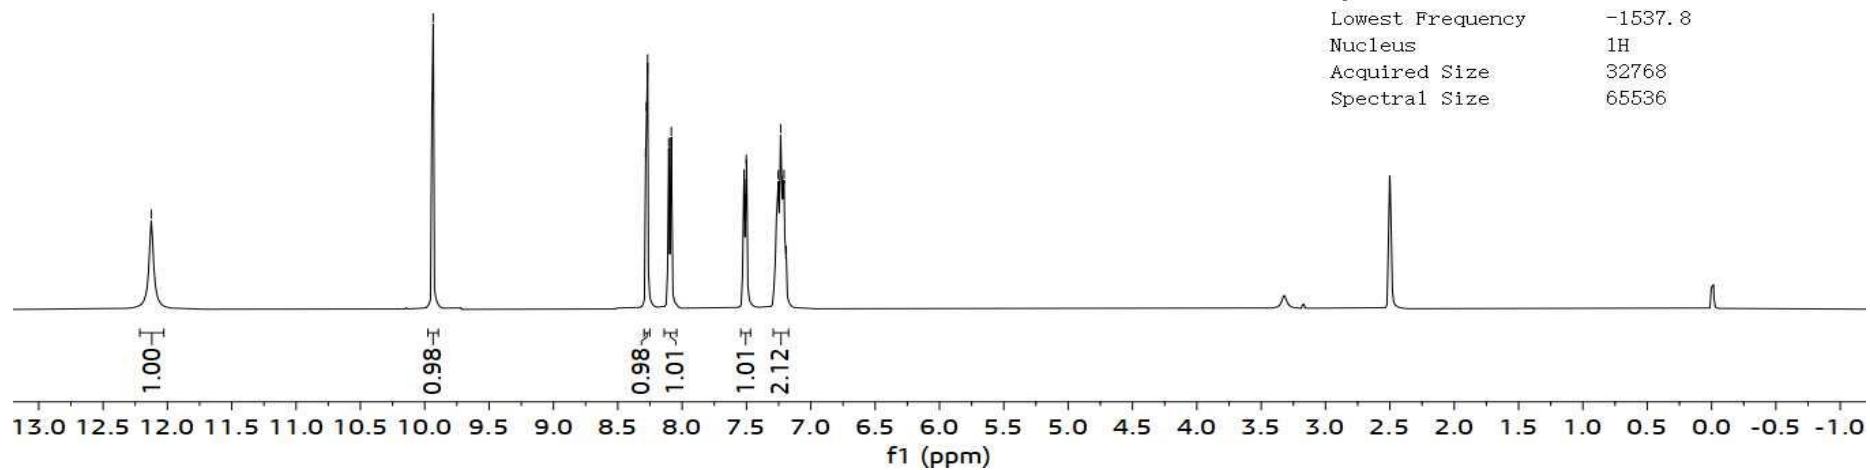

— 184.90

138.37  
137.02  
124.10  
123.41  
122.07  
120.78  
118.14  
112.38

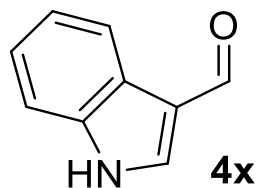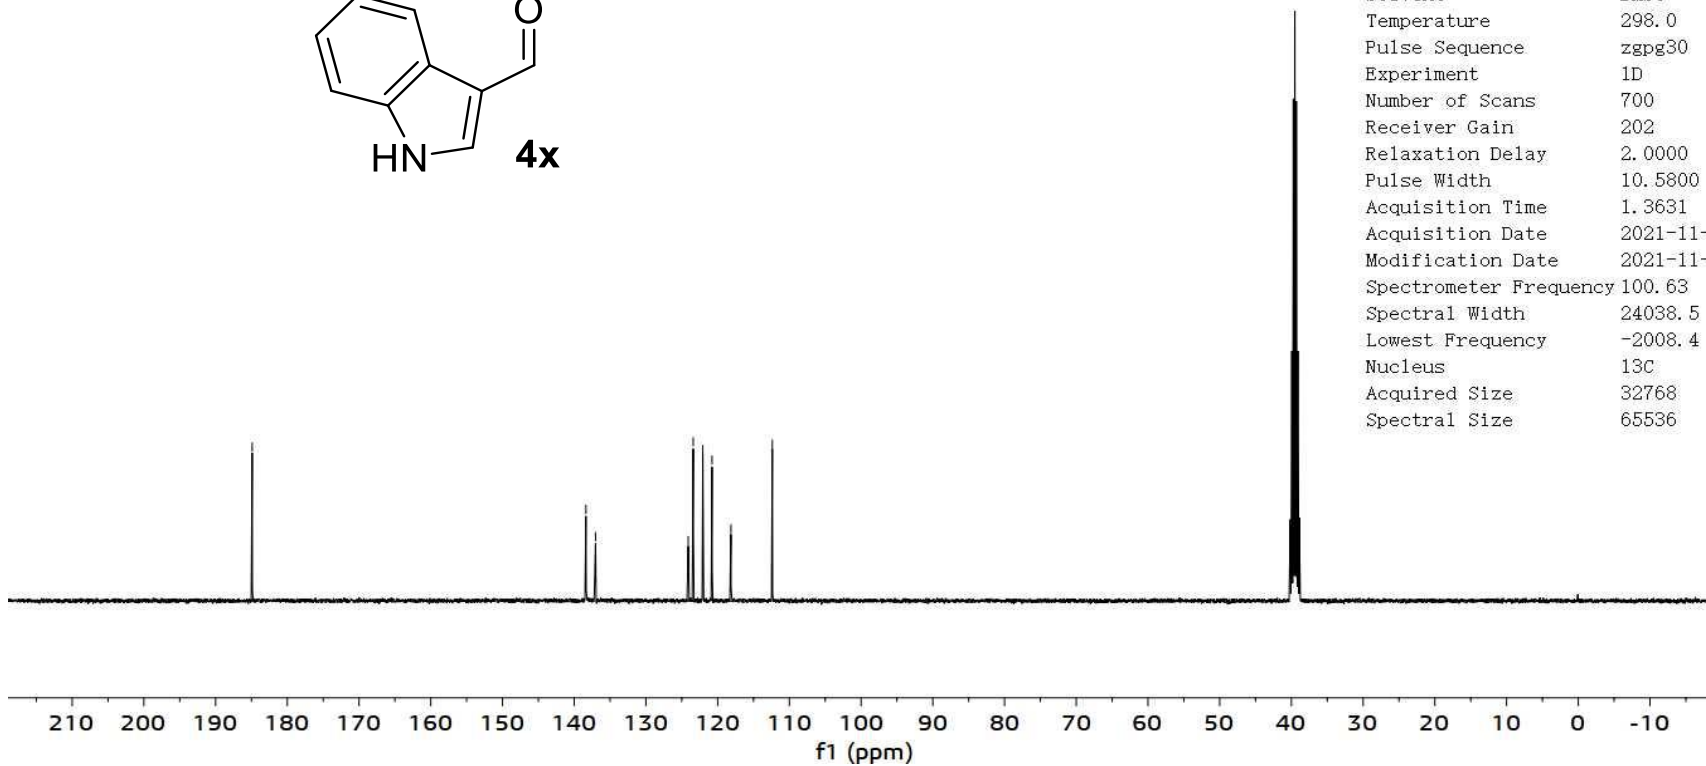

|                        |                     |
|------------------------|---------------------|
| Title                  | WYX-25YD. 2. fid    |
| Origin                 | Bruker BioSpin GmbH |
| Owner                  | rmrsu               |
| Spectrometer           | spect               |
| Solvent                | DMSO                |
| Temperature            | 298.0               |
| Pulse Sequence         | zgpg30              |
| Experiment             | 1D                  |
| Number of Scans        | 700                 |
| Receiver Gain          | 202                 |
| Relaxation Delay       | 2.0000              |
| Pulse Width            | 10.5800             |
| Acquisition Time       | 1.3631              |
| Acquisition Date       | 2021-11-11T02:02:49 |
| Modification Date      | 2021-11-11T02:02:48 |
| Spectrometer Frequency | 100.63              |
| Spectral Width         | 24038.5             |
| Lowest Frequency       | -2008.4             |
| Nucleus                | 13C                 |
| Acquired Size          | 32768               |
| Spectral Size          | 65536               |

7.9689  
7.9493  
7.5628  
7.5455  
7.5261  
7.4706  
7.4513  
7.4324

2.9818  
2.9633  
2.9447  
1.7604  
1.7421  
1.7234  
1.7045  
1.6855  
1.4586  
1.4400  
1.4213  
1.4025  
1.3840  
1.3657  
0.9715  
0.9531  
0.9348

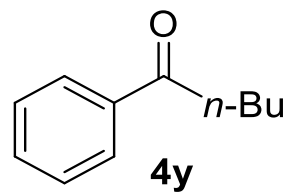

|                        |                     |
|------------------------|---------------------|
| Title                  | Benwutong.1.1       |
| Origin                 | Bruker BioSpin GmbH |
| Owner                  | nrsu                |
| Spectrometer           | spect               |
| Solvent                | CDC13               |
| Temperature            | 298.0               |
| Pulse Sequence         | zg30                |
| Experiment             | 1D                  |
| Number of Scans        | 16                  |
| Receiver Gain          | 31                  |
| Relaxation Delay       | 1.0000              |
| Pulse Width            | 9.7800              |
| Acquisition Time       | 4.0894              |
| Acquisition Date       | 2021-03-05T15:55:20 |
| Modification Date      | 2021-03-05T15:55:22 |
| Spectrometer Frequency | 400.15              |
| Spectral Width         | 8012.8              |
| Lowest Frequency       | -1545.4             |
| Nucleus                | 1H                  |
| Acquired Size          | 32768               |
| Spectral Size          | 65536               |

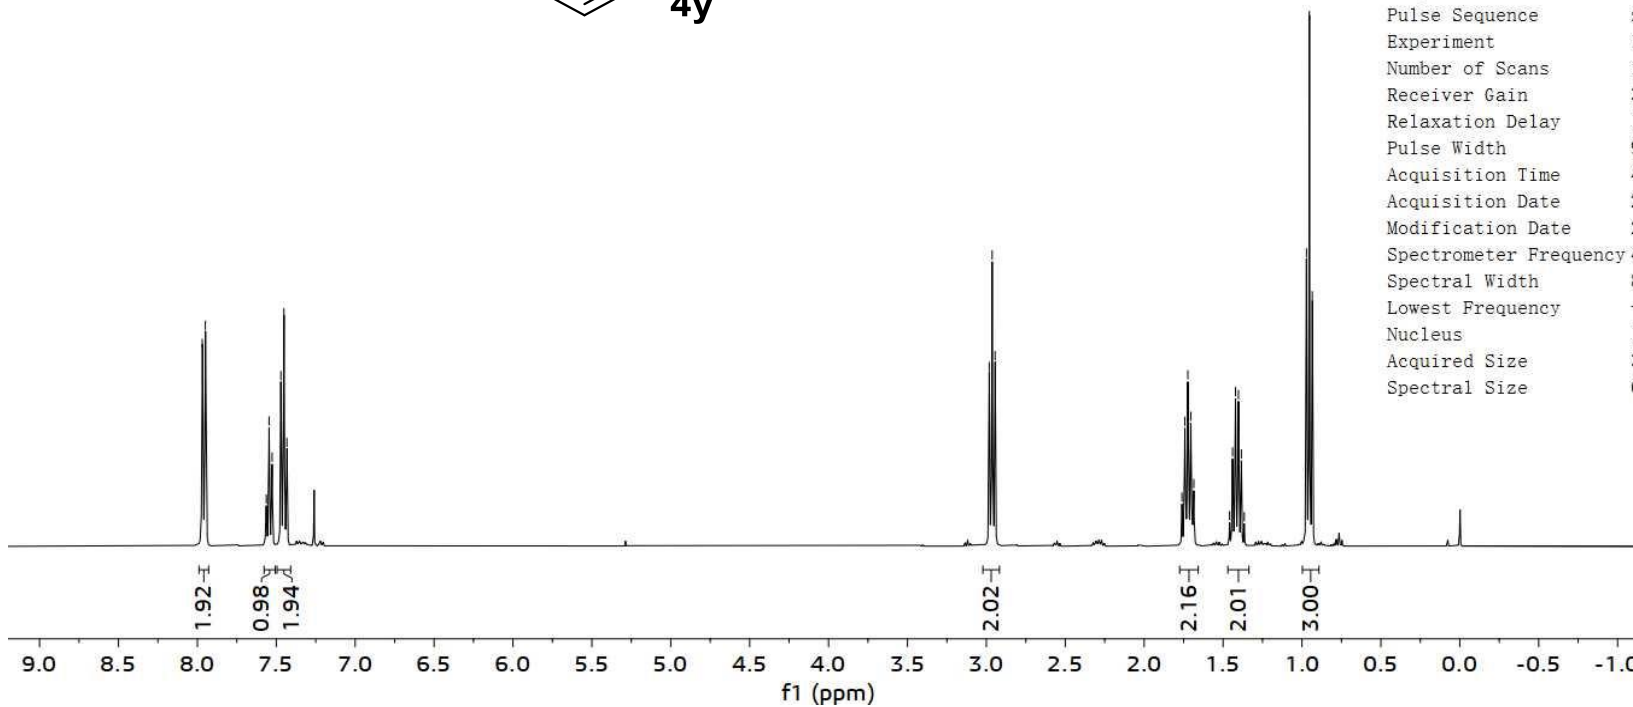

—200.69

✓137.22  
✓132.96  
✓128.66  
✓128.16

—38.44

✓26.60  
✓22.60  
✓14.06

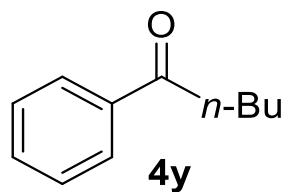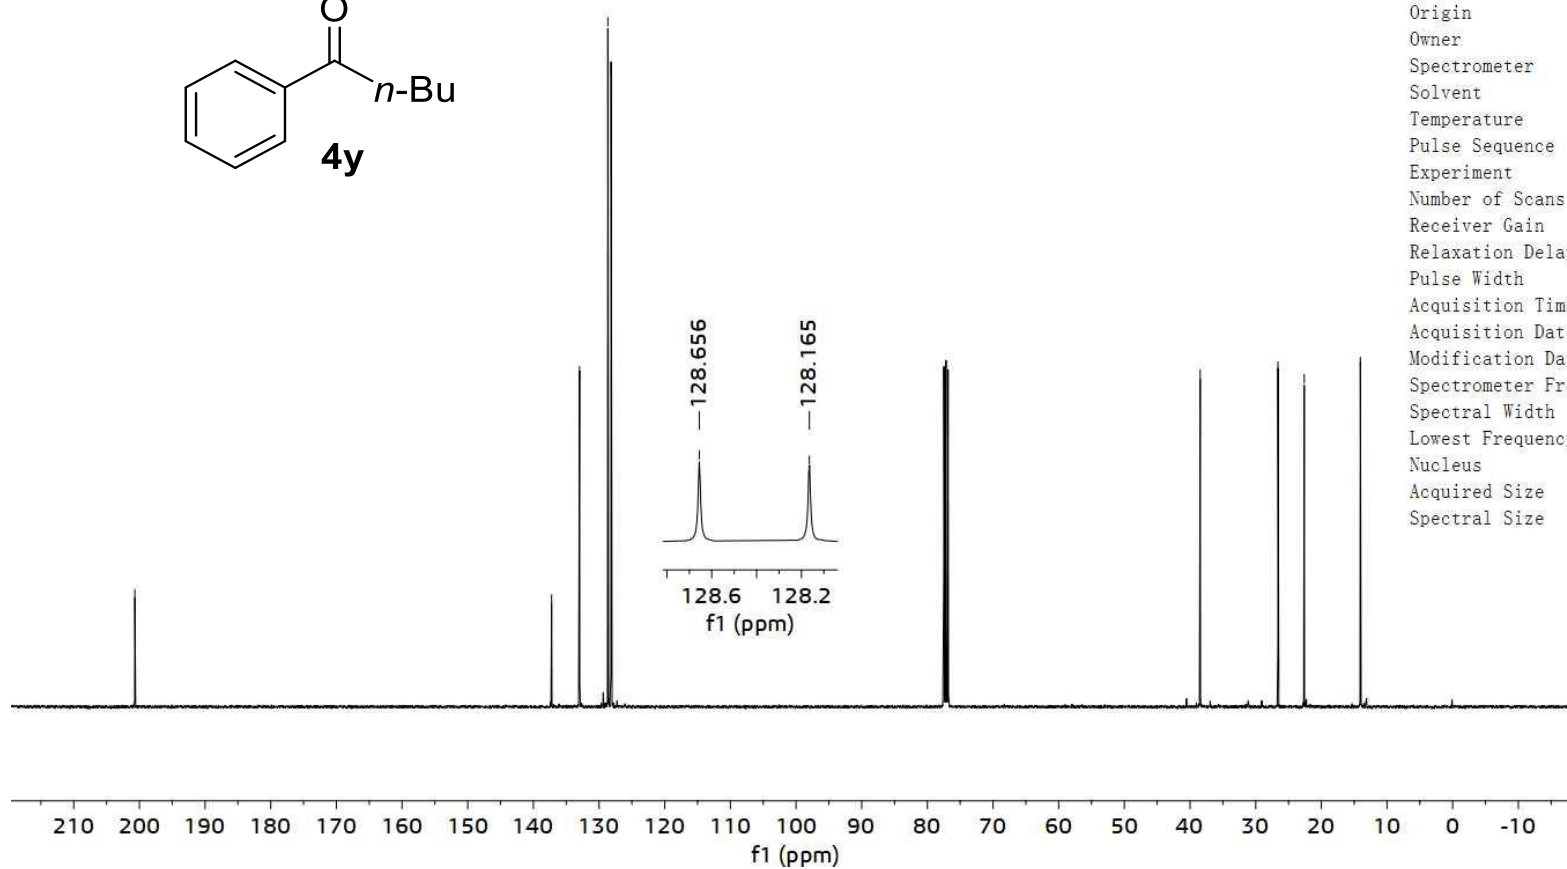

|                        |                     |
|------------------------|---------------------|
| Title                  | Benwutong. 2. 1     |
| Origin                 | Bruker BioSpin GmbH |
| Owner                  | nrsu                |
| Spectrometer           | spect               |
| Solvent                | CDC13               |
| Temperature            | 298.0               |
| Pulse Sequence         | zgpg30              |
| Experiment             | 1D                  |
| Number of Scans        | 1024                |
| Receiver Gain          | 202                 |
| Relaxation Delay       | 2.0000              |
| Pulse Width            | 10.5800             |
| Acquisition Time       | 1.3631              |
| Acquisition Date       | 2021-03-05T18:33:43 |
| Modification Date      | 2021-03-05T18:33:44 |
| Spectrometer Frequency | 100.62              |
| Spectral Width         | 24038.5             |
| Lowest Frequency       | -1947.3             |
| Nucleus                | 13C                 |
| Acquired Size          | 32768               |
| Spectral Size          | 65536               |

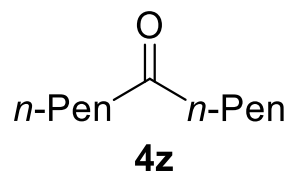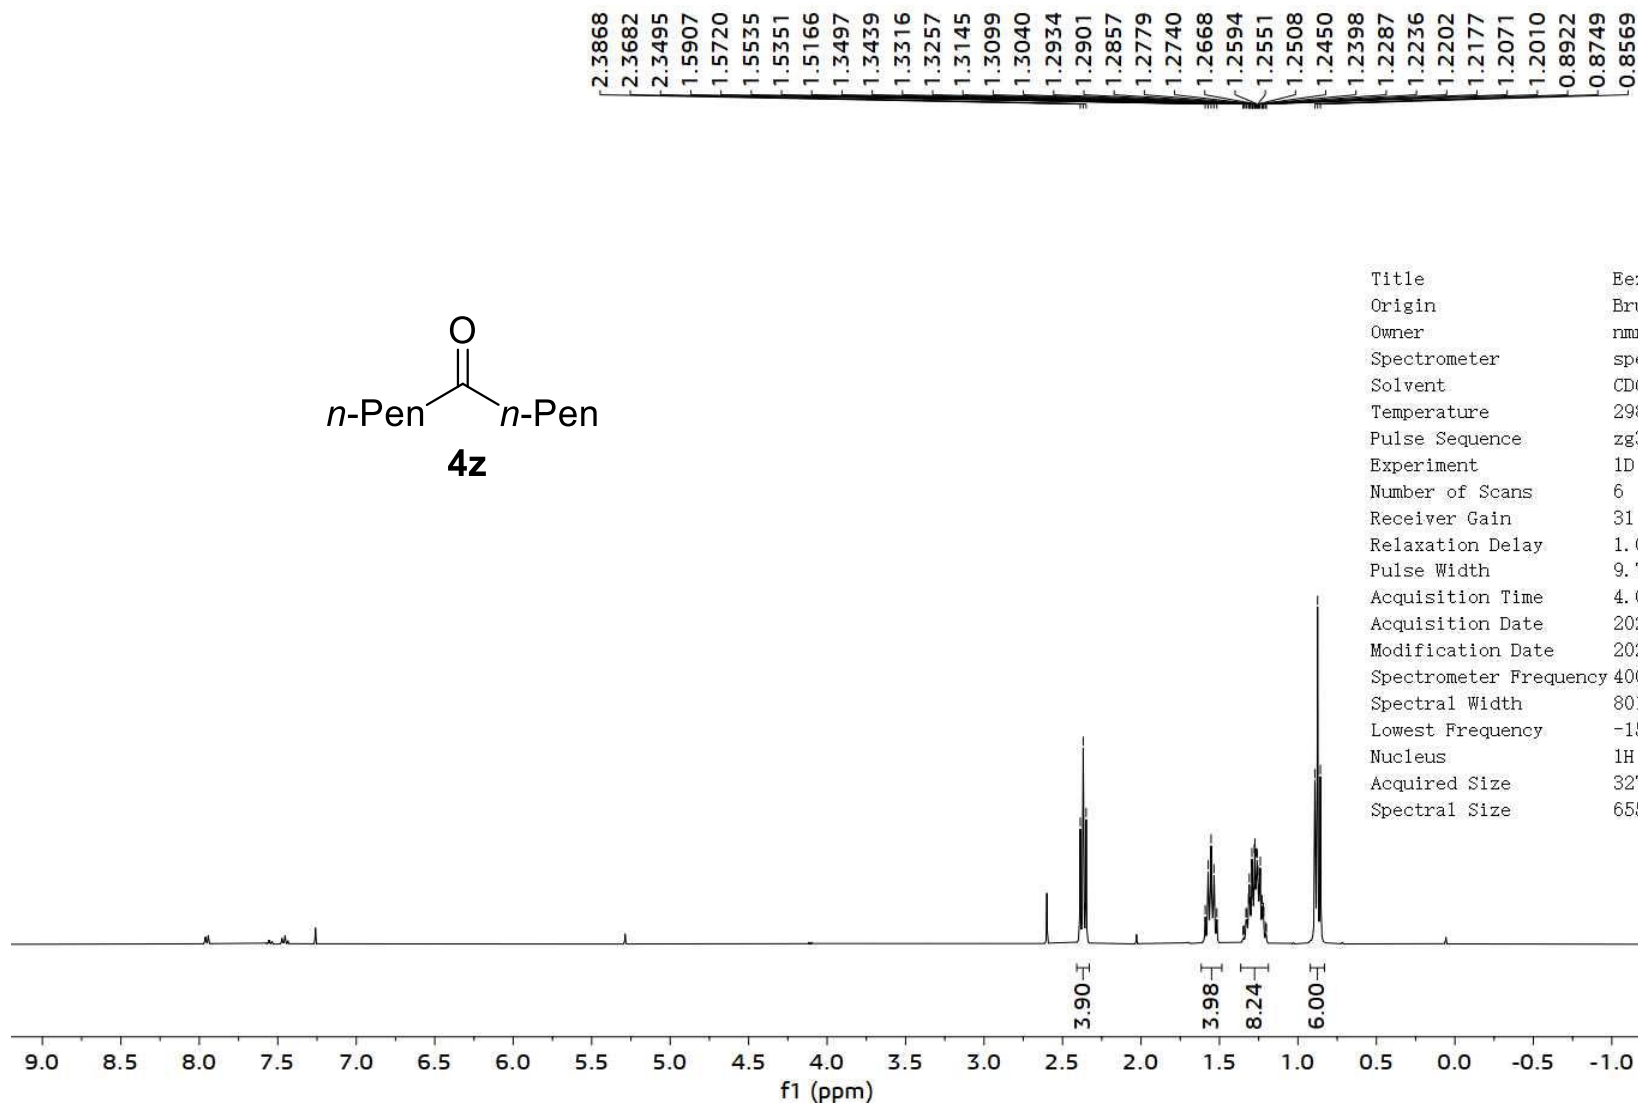

|                        |                       |
|------------------------|-----------------------|
| Title                  | Bezhengwujitong.1.fid |
| Origin                 | Bruker BioSpin GmbH   |
| Owner                  | nmrsu                 |
| Spectrometer           | spect                 |
| Solvent                | CDC13                 |
| Temperature            | 298.0                 |
| Pulse Sequence         | zg30                  |
| Experiment             | 1D                    |
| Number of Scans        | 6                     |
| Receiver Gain          | 31                    |
| Relaxation Delay       | 1.0000                |
| Pulse Width            | 9.7800                |
| Acquisition Time       | 4.0894                |
| Acquisition Date       | 2020-12-14T19:47:26   |
| Modification Date      | 2020-12-14T19:47:28   |
| Spectrometer Frequency | 400.15                |
| Spectral Width         | 8012.8                |
| Lowest Frequency       | -1545.4               |
| Nucleus                | 1H                    |
| Acquired Size          | 32768                 |
| Spectral Size          | 65536                 |

— 211.82

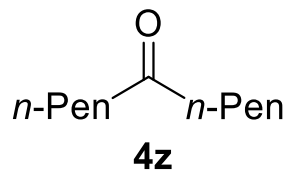

— 42.90

31.58  
23.70  
22.59  
14.04

|                        |                     |
|------------------------|---------------------|
| Title                  | Ezhenhwujitong.2.1  |
| Origin                 | Bruker BioSpin GmbH |
| Owner                  | nmrsu               |
| Spectrometer           | spect               |
| Solvent                | CDC13               |
| Temperature            | 298.0               |
| Pulse Sequence         | zgpg30              |
| Experiment             | 1D                  |
| Number of Scans        | 500                 |
| Receiver Gain          | 202                 |
| Relaxation Delay       | 2.0000              |
| Pulse Width            | 10.5800             |
| Acquisition Time       | 1.3631              |
| Acquisition Date       | 2020-12-14T20:17:09 |
| Modification Date      | 2020-12-14T20:17:12 |
| Spectrometer Frequency | 100.62              |
| Spectral Width         | 24038.5             |
| Lowest Frequency       | -1944.7             |
| Nucleus                | 13C                 |
| Acquired Size          | 32768               |
| Spectral Size          | 65536               |

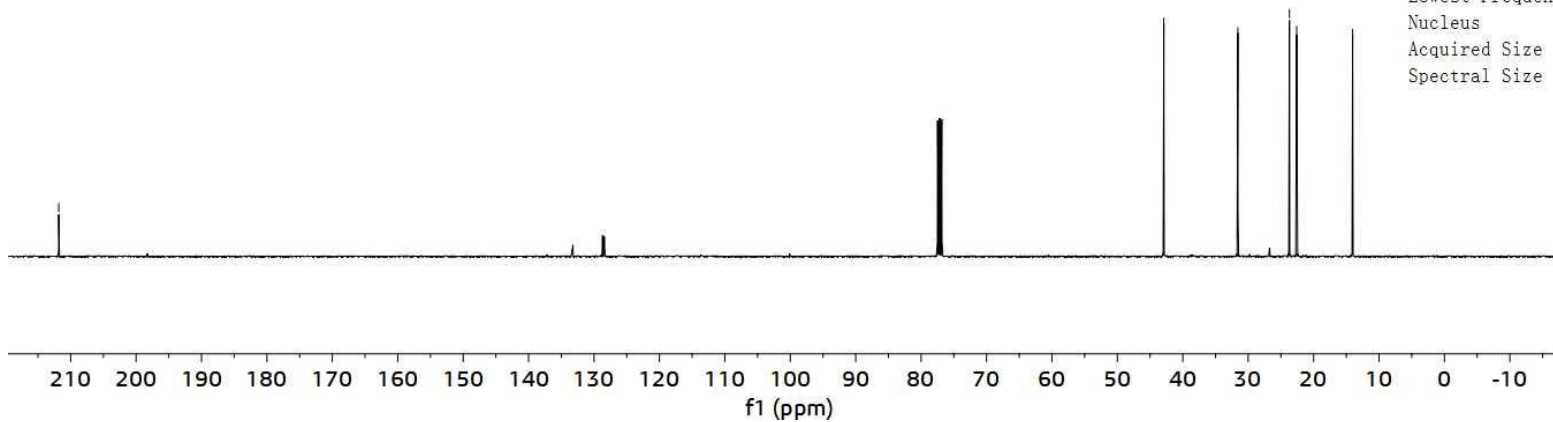

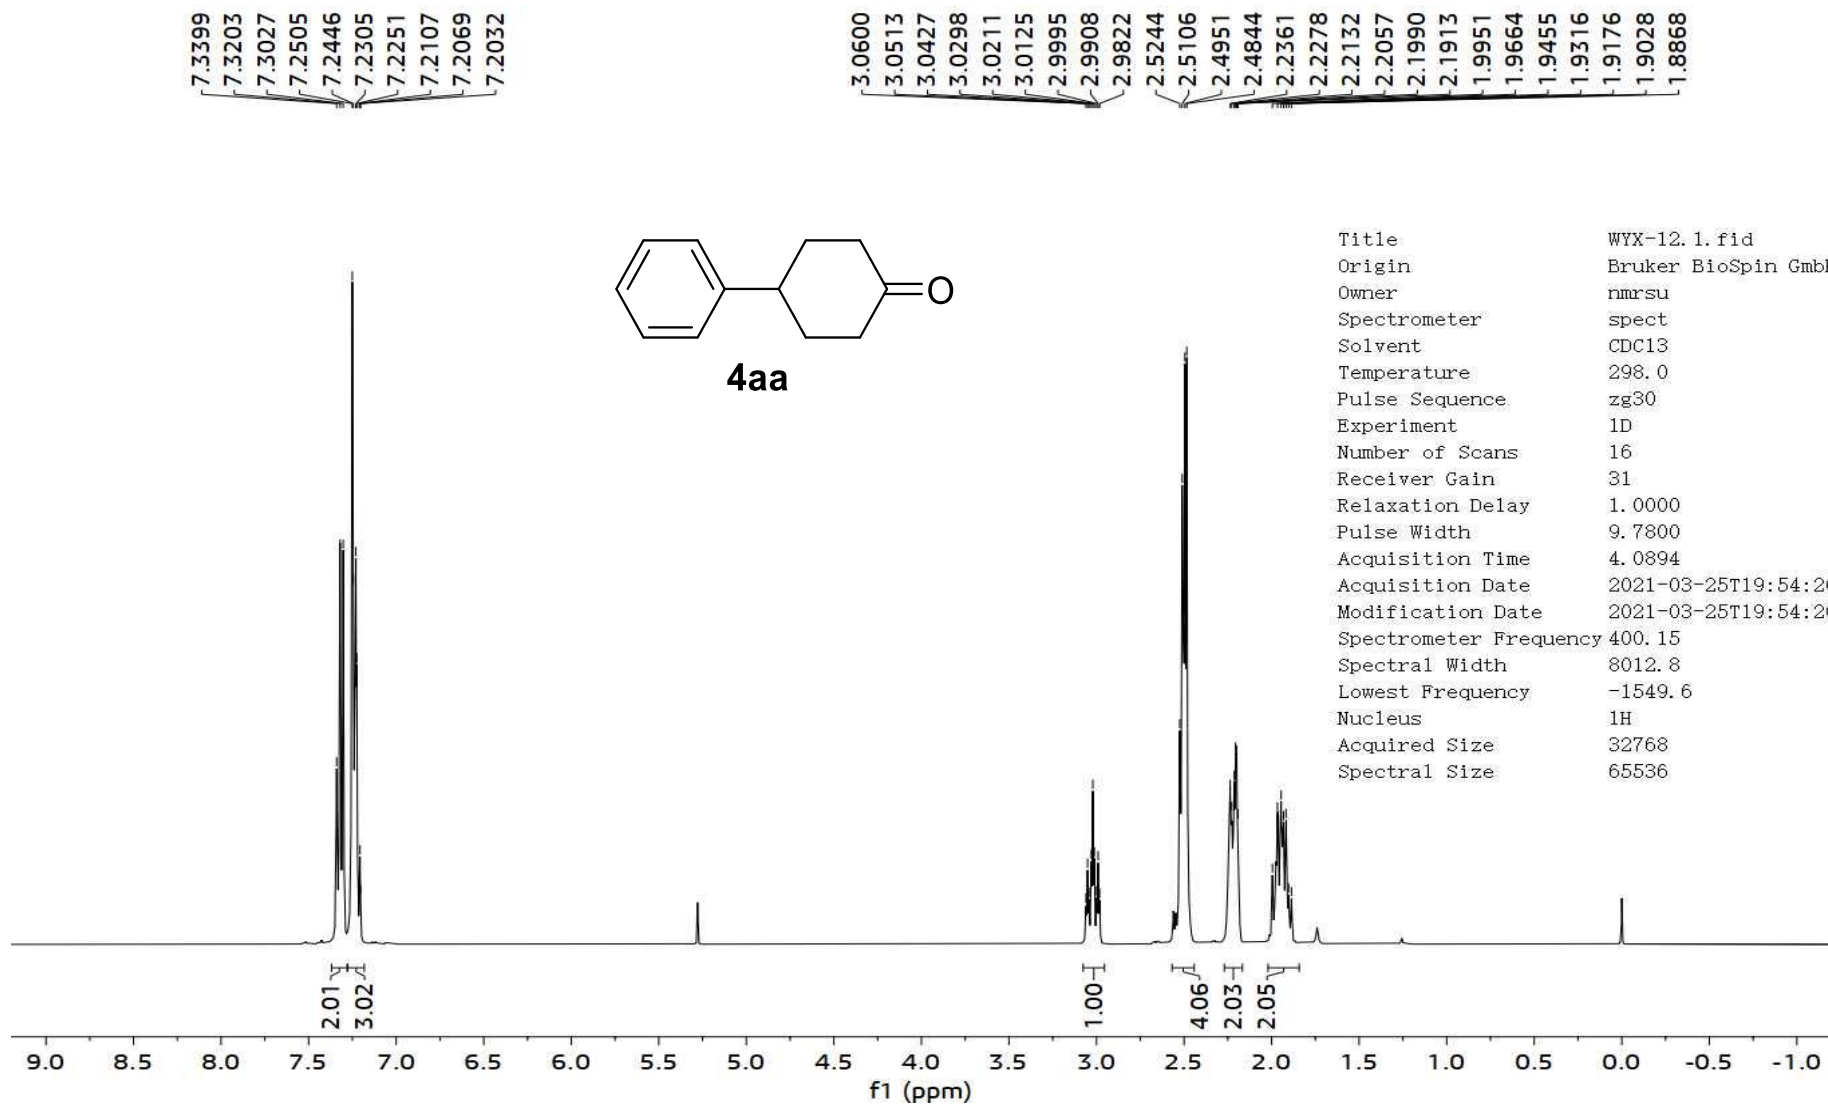



-211.19

-144.88

128.69  
126.77  
126.67

42.84  
41.45  
34.05

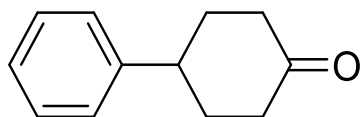

4aa

|                        |                     |
|------------------------|---------------------|
| Title                  | WYX-12. 2. fid      |
| Origin                 | Bruker BioSpin GmbH |
| Owner                  | nmrsu               |
| Spectrometer           | spect               |
| Solvent                | CDC13               |
| Temperature            | 298.0               |
| Pulse Sequence         | zgpg30              |
| Experiment             | 1D                  |
| Number of Scans        | 800                 |
| Receiver Gain          | 202                 |
| Relaxation Delay       | 2.0000              |
| Pulse Width            | 10.5800             |
| Acquisition Time       | 1.3631              |
| Acquisition Date       | 2021-03-25T20:41:07 |
| Modification Date      | 2021-03-25T20:41:06 |
| Spectrometer Frequency | 100.63              |
| Spectral Width         | 24038.5             |
| Lowest Frequency       | -1951.5             |
| Nucleus                | 13C                 |
| Acquired Size          | 32768               |
| Spectral Size          | 65536               |

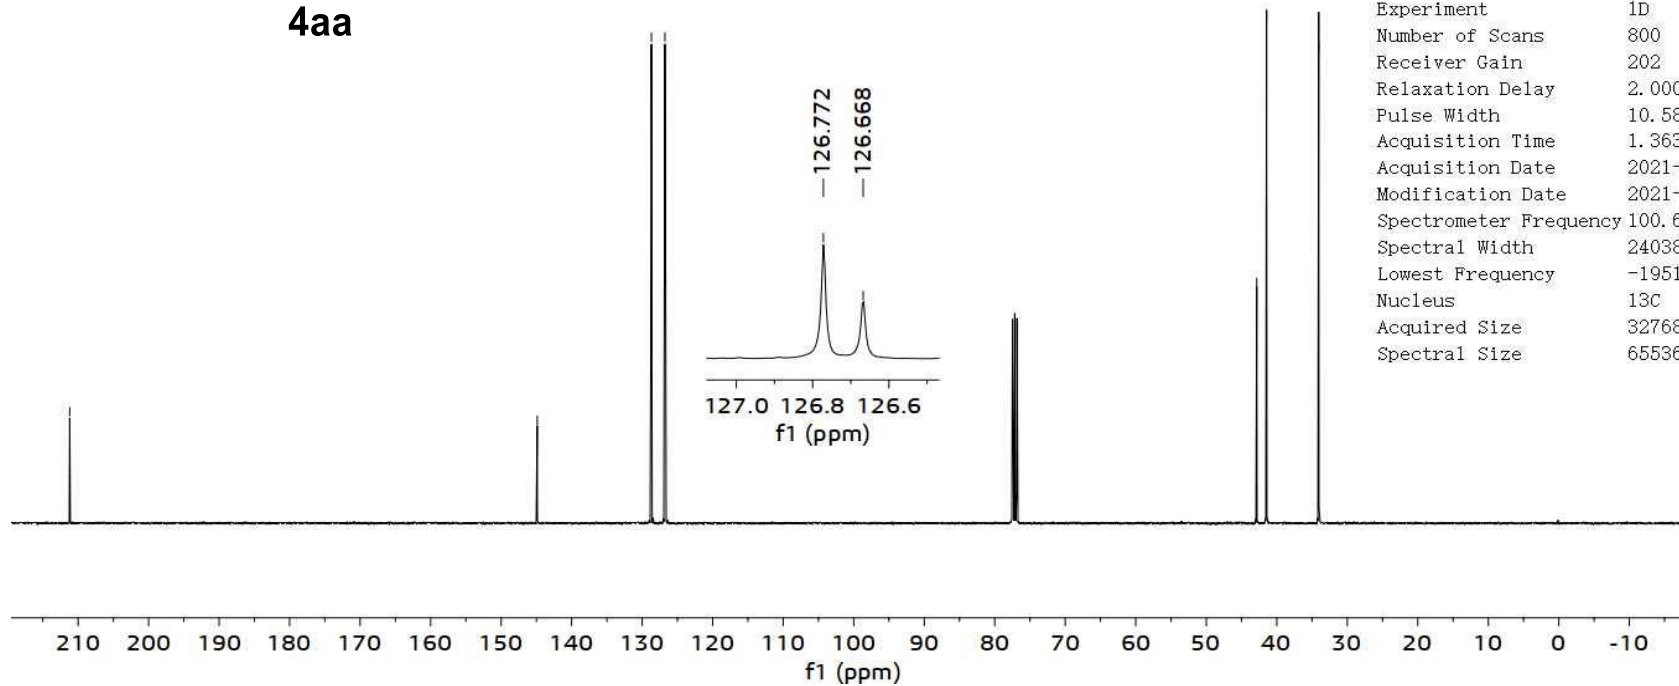

2.3909  
2.3853  
2.3826  
2.3790  
2.3745  
2.3584  
2.3530  
2.3464  
2.3418  
2.3378  
2.3212  
2.3178  
2.3086  
2.3061  
2.3036  
2.2920  
2.2888  
2.2864  
2.2830  
2.2779  
2.2737  
2.2703  
2.2532  
2.0760  
2.0699  
2.0663  
2.0616  
2.0574  
2.0510  
2.0426  
2.0366  
2.0316  
1.4735  
1.4693  
1.4621  
1.4520  
1.4467  
1.4437  
1.4387  
1.4316  
1.4220  
1.4102  
1.4032  
1.4011  
1.3923  
1.3883  
0.8902

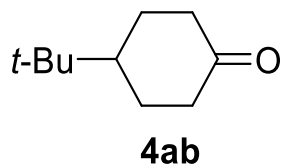

|                        |                     |
|------------------------|---------------------|
| Title                  | WYX-11.1.fid        |
| Origin                 | Bruker BioSpin GmbH |
| Owner                  | nmrsm               |
| Spectrometer           | spect               |
| Solvent                | CDC13               |
| Temperature            | 298.0               |
| Pulse Sequence         | zg30                |
| Experiment             | 1D                  |
| Number of Scans        | 16                  |
| Receiver Gain          | 31                  |
| Relaxation Delay       | 1.0000              |
| Pulse Width            | 9.7800              |
| Acquisition Time       | 4.0894              |
| Acquisition Date       | 2021-03-25T20:50:29 |
| Modification Date      | 2021-03-25T20:50:28 |
| Spectrometer Frequency | 400.15              |
| Spectral Width         | 8012.8              |
| Lowest Frequency       | -1545.6             |
| Nucleus                | 1H                  |
| Acquired Size          | 32768               |
| Spectral Size          | 65536               |

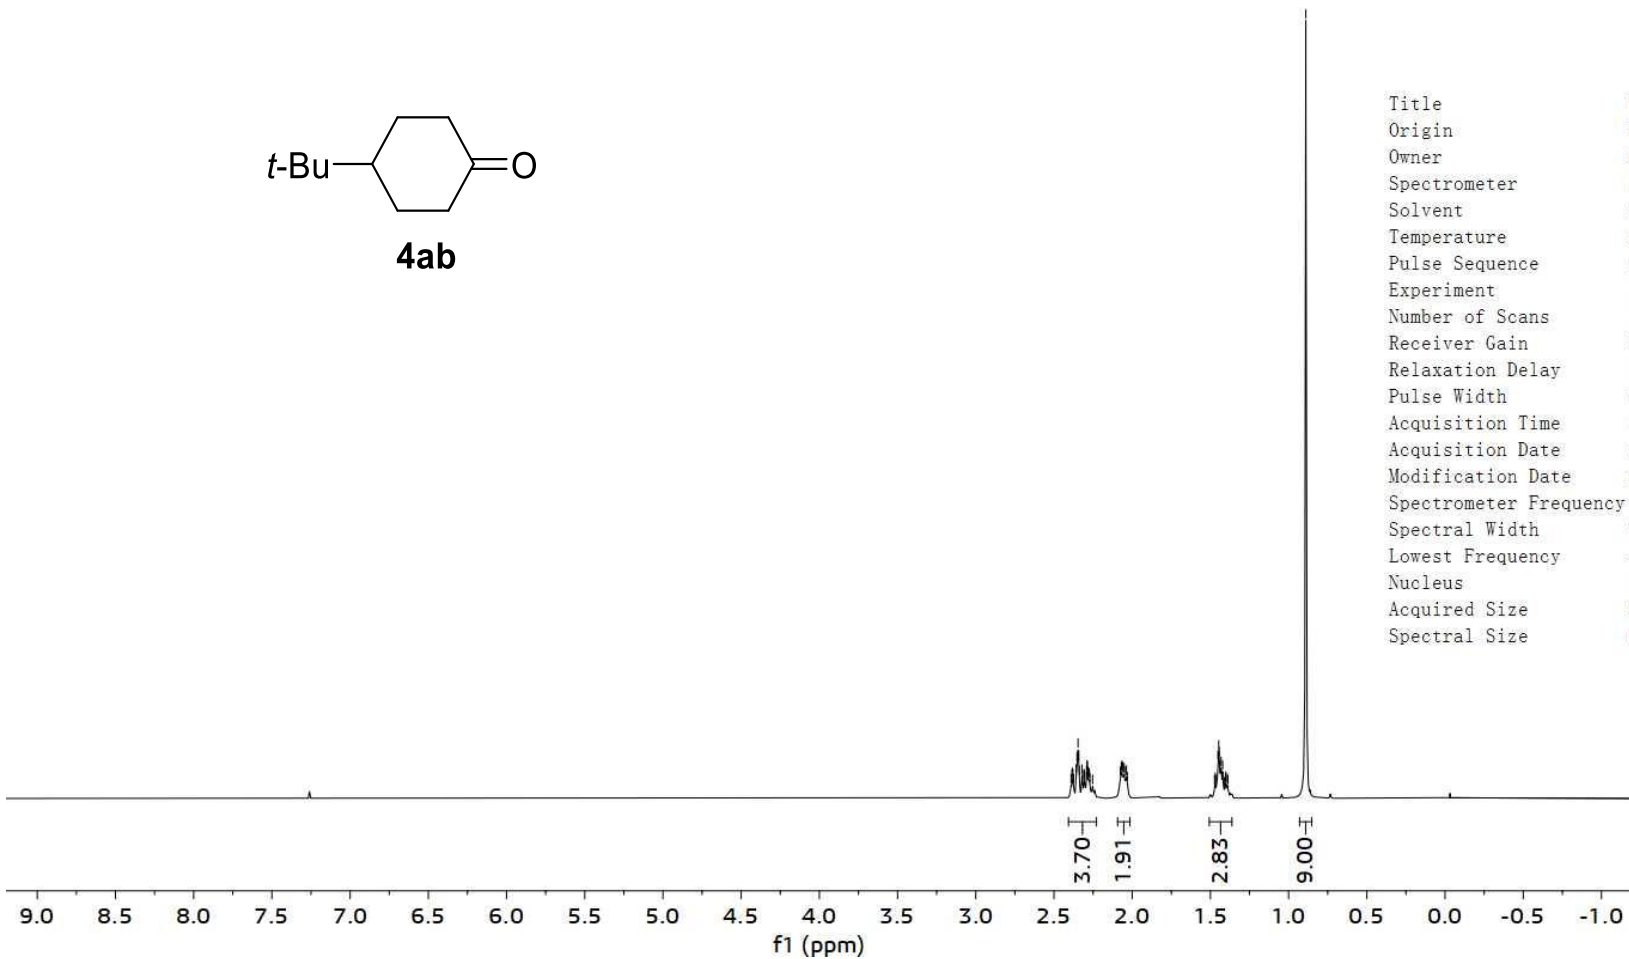

—212.61

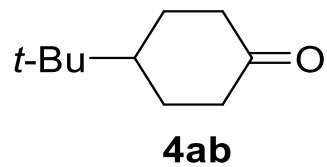

—46.80  
—41.40  
—32.55  
—27.69

|                        |                     |
|------------------------|---------------------|
| Title                  | WYX-11.2.fid        |
| Origin                 | Bruker BioSpin GmbH |
| Owner                  | nmrsu               |
| Spectrometer           | spect               |
| Solvent                | CDC13               |
| Temperature            | 298.0               |
| Pulse Sequence         | zgpg30              |
| Experiment             | 1D                  |
| Number of Scans        | 800                 |
| Receiver Gain          | 202                 |
| Relaxation Delay       | 2.0000              |
| Pulse Width            | 10.5800             |
| Acquisition Time       | 1.3631              |
| Acquisition Date       | 2021-03-25T21:37:16 |
| Modification Date      | 2021-03-25T21:37:16 |
| Spectrometer Frequency | 100.63              |
| Spectral Width         | 24038.5             |
| Lowest Frequency       | -1947.8             |
| Nucleus                | <sup>13</sup> C     |
| Acquired Size          | 32768               |
| Spectral Size          | 65536               |

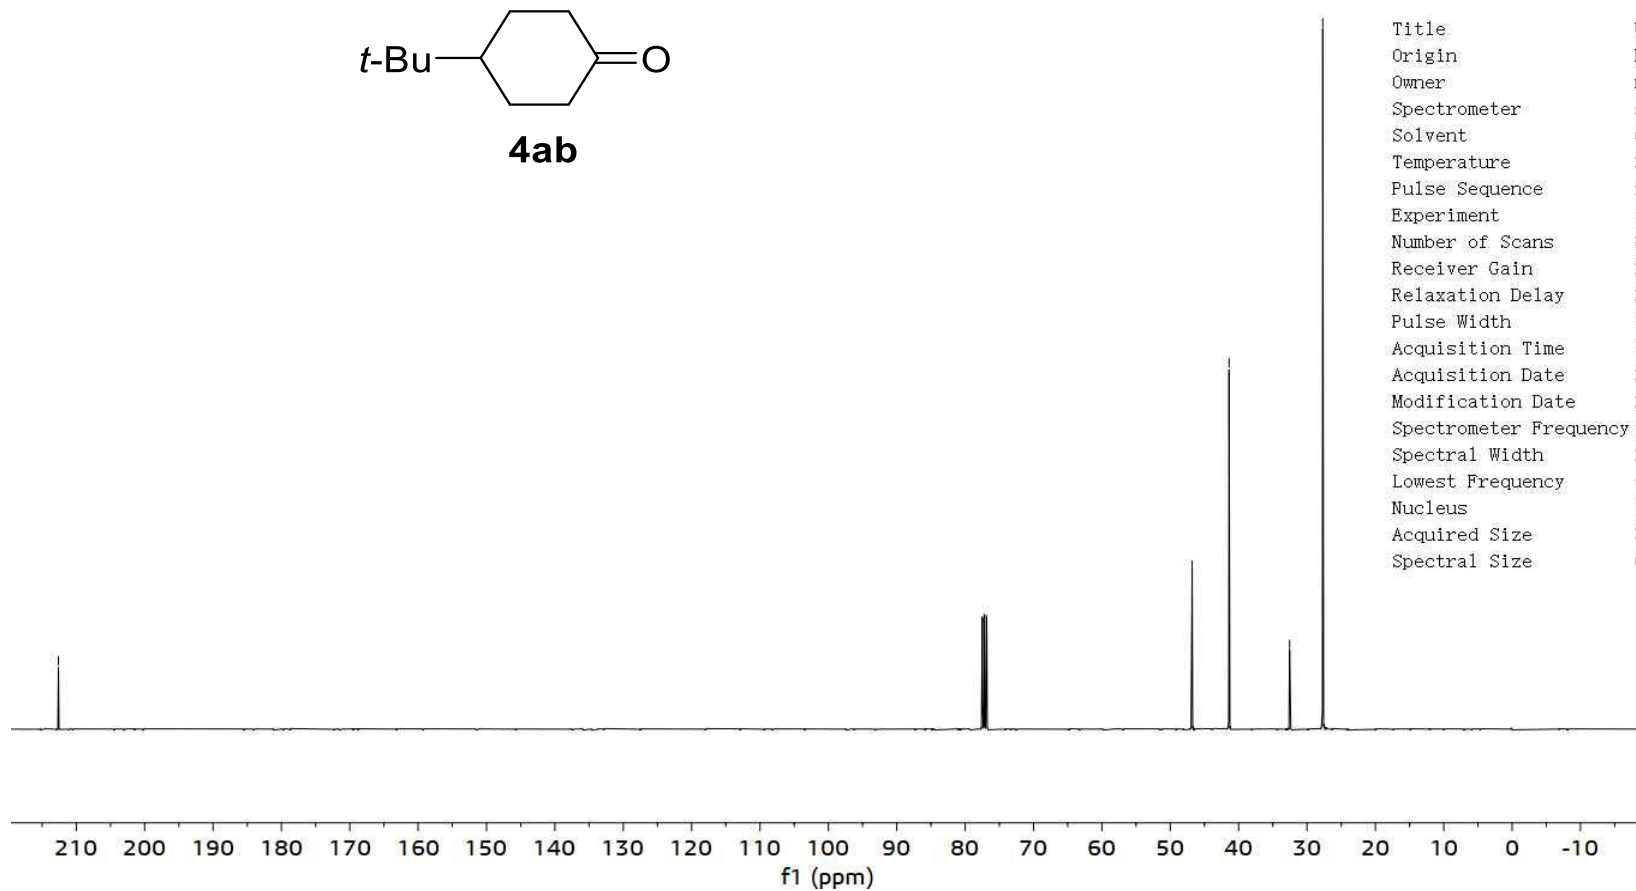

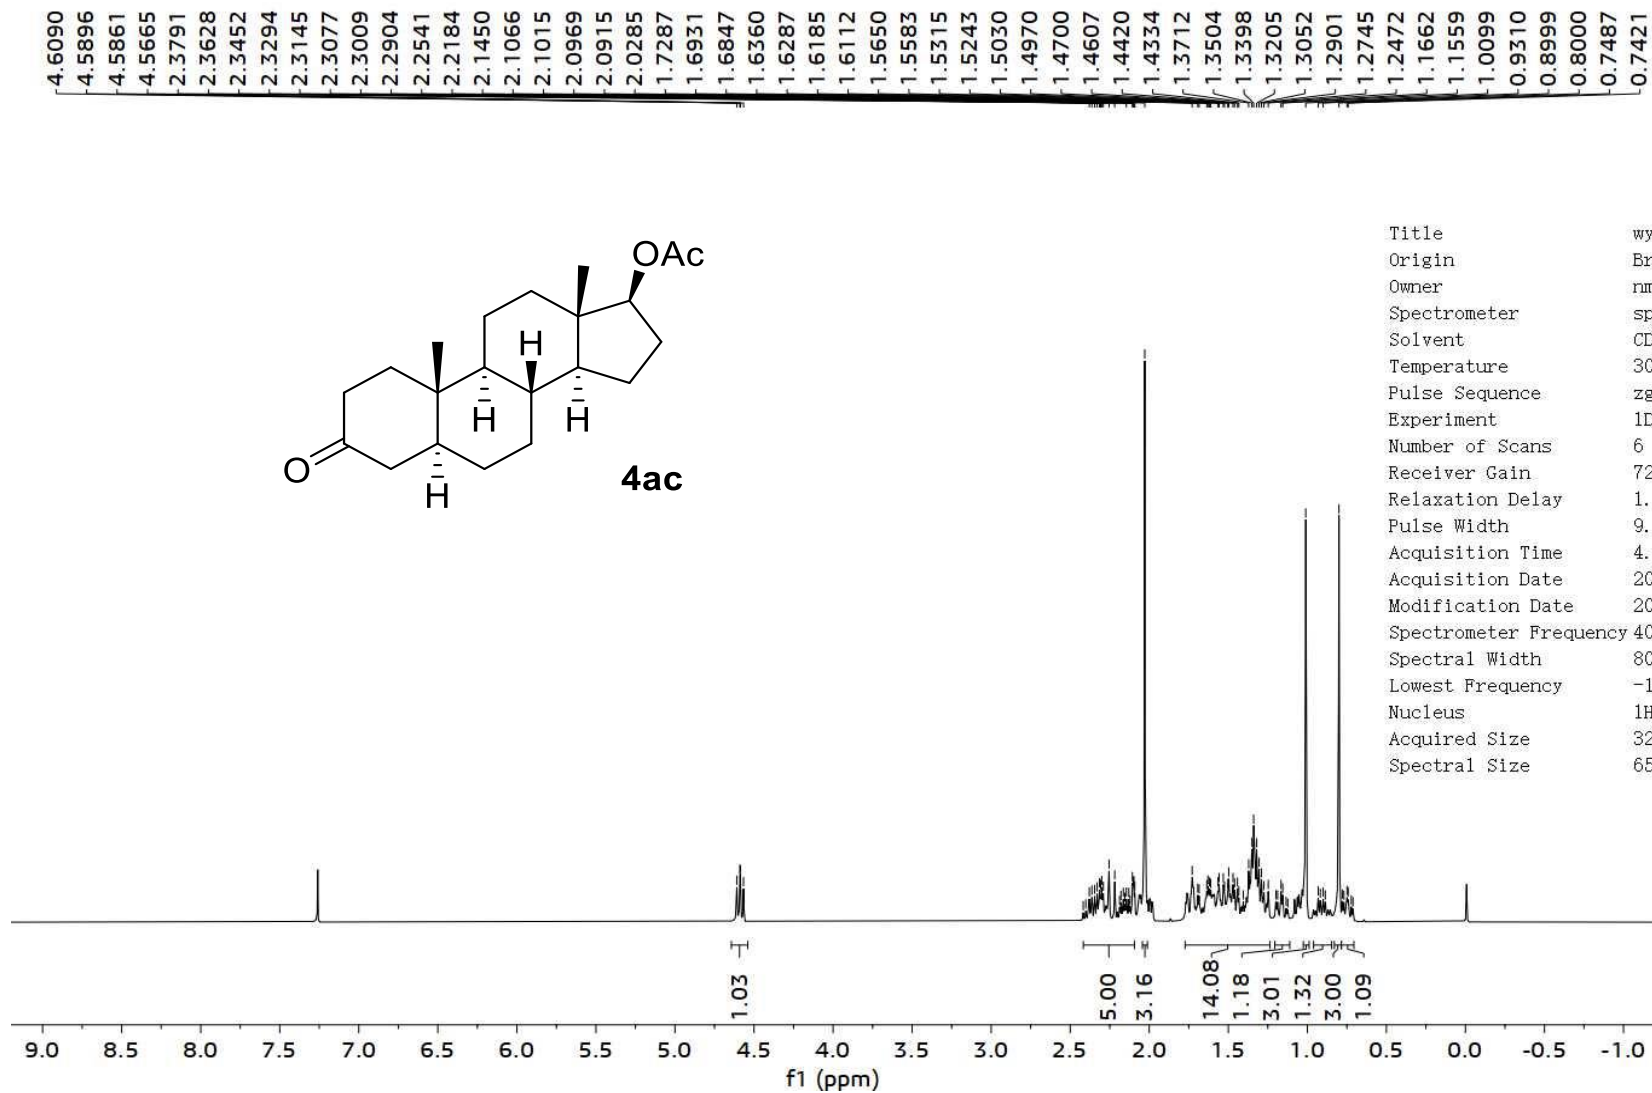

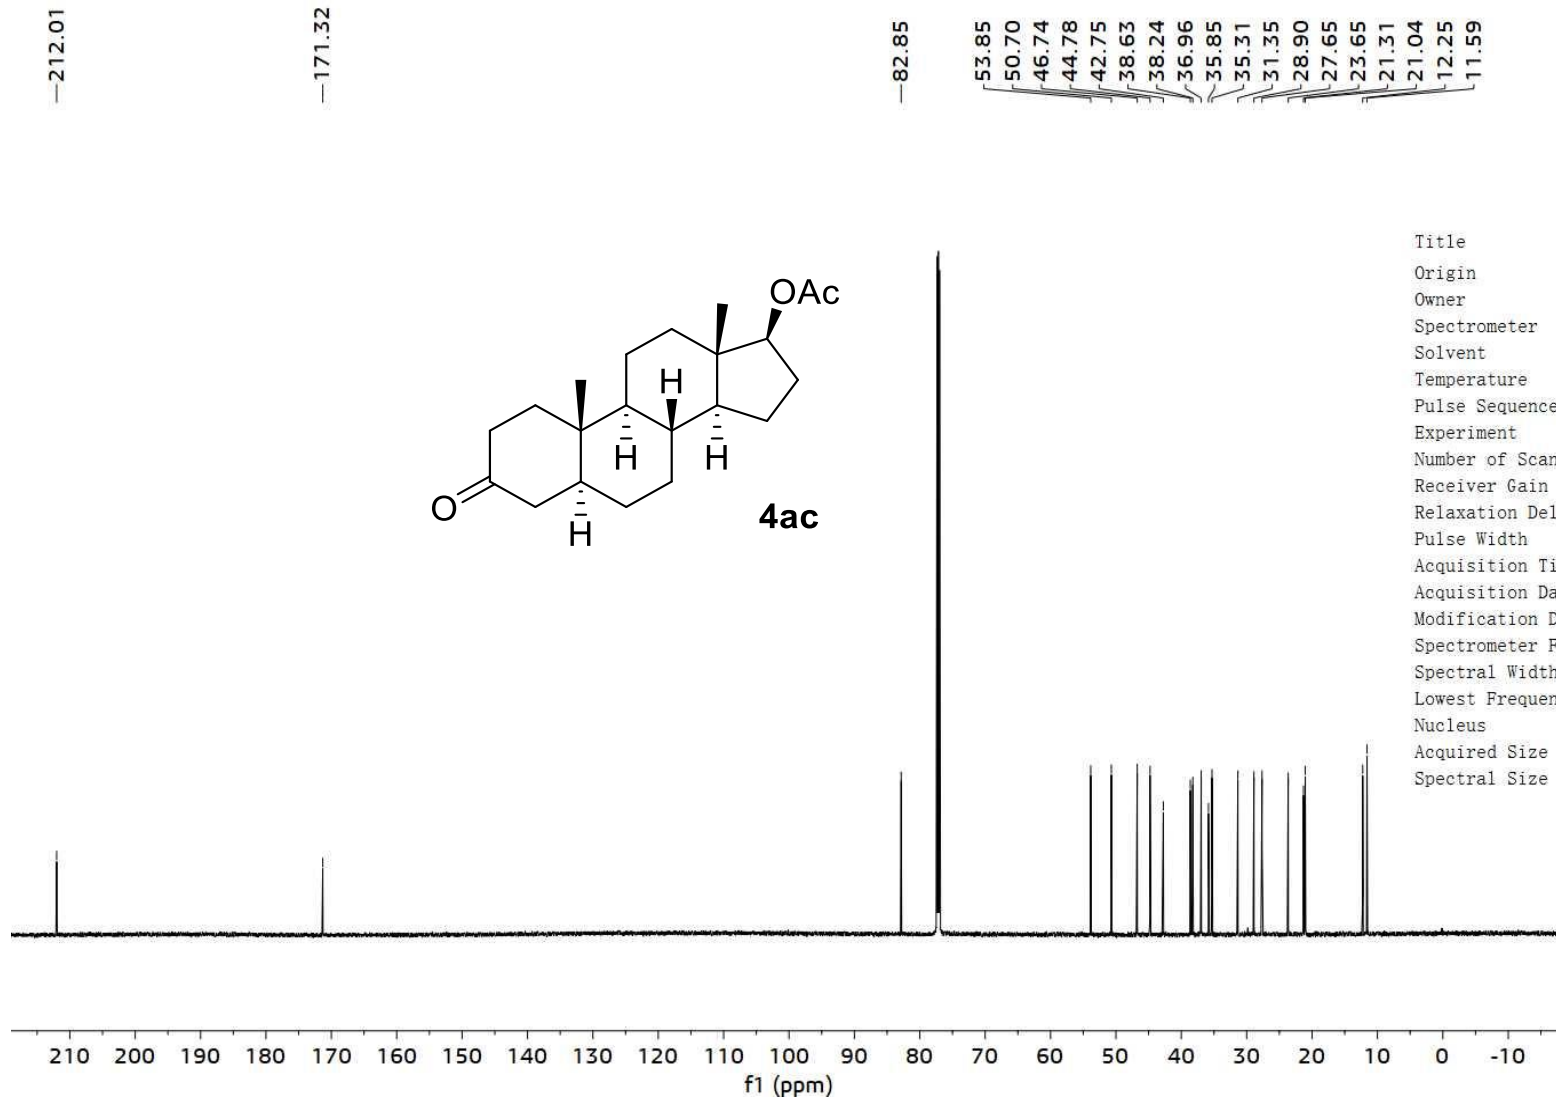

7.7602  
7.7410  
7.5965  
7.5934  
7.5766  
7.5595  
7.5564  
7.4805  
7.4613  
7.3776  
7.3590  
7.3405

3.1521  
3.1376  
3.1226  
2.6960  
2.6859  
2.6810  
2.6767  
2.6663

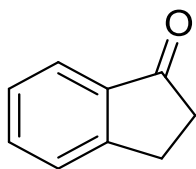

4ad

|                        |                     |
|------------------------|---------------------|
| Title                  | WYX-71-charwu. 1. 1 |
| Origin                 | Bruker BioSpin GmbH |
| Owner                  | nmrsu               |
| Spectrometer           | spect               |
| Solvent                | CDC13               |
| Temperature            | 296.9               |
| Pulse Sequence         | zg30                |
| Experiment             | 1D                  |
| Number of Scans        | 6                   |
| Receiver Gain          | 72                  |
| Relaxation Delay       | 1.0000              |
| Pulse Width            | 9.7800              |
| Acquisition Time       | 4.0894              |
| Acquisition Date       | 2021-05-27T15:55:16 |
| Modification Date      | 2021-05-27T15:55:18 |
| Spectrometer Frequency | 400.15              |
| Spectral Width         | 8012.8              |
| Lowest Frequency       | -1545.2             |
| Nucleus                | 1H                  |
| Acquired Size          | 32768               |
| Spectral Size          | 65536               |

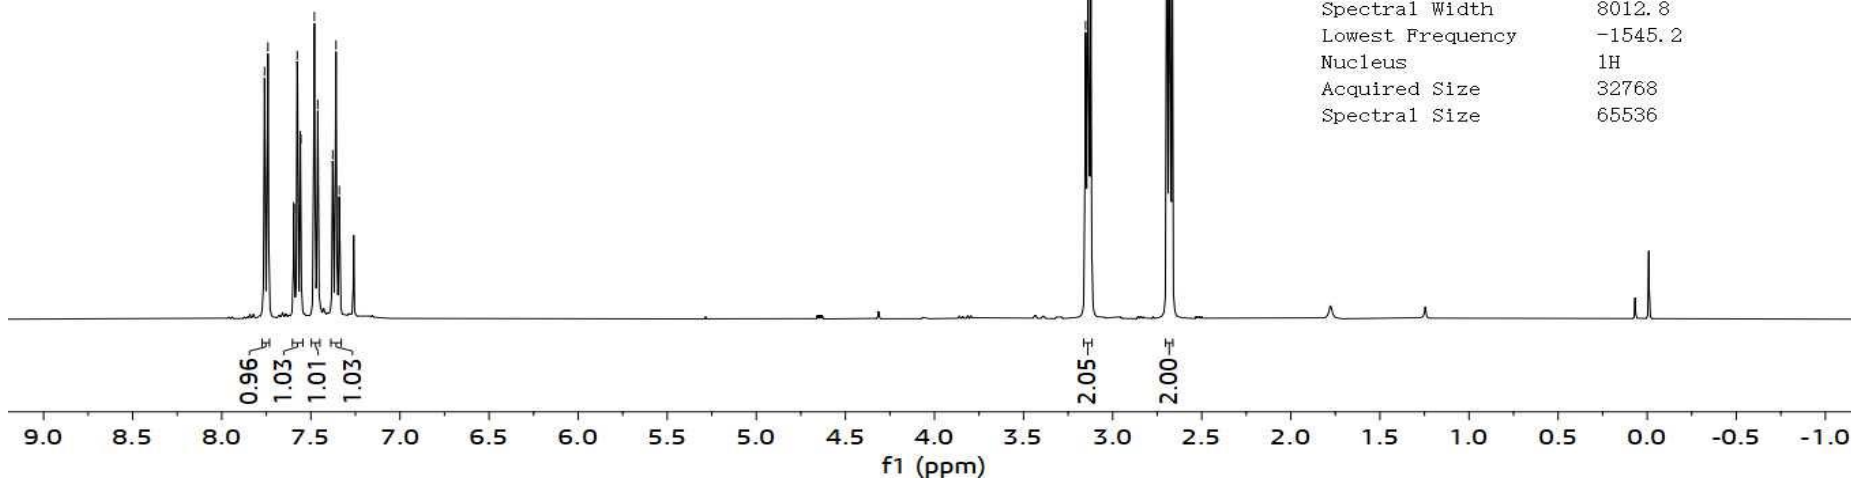

—207.17

—155.27

✓137.20

—134.70

✓127.39

✓126.81

✓123.82

—36.33

—25.91

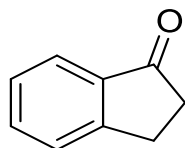

**4ad**

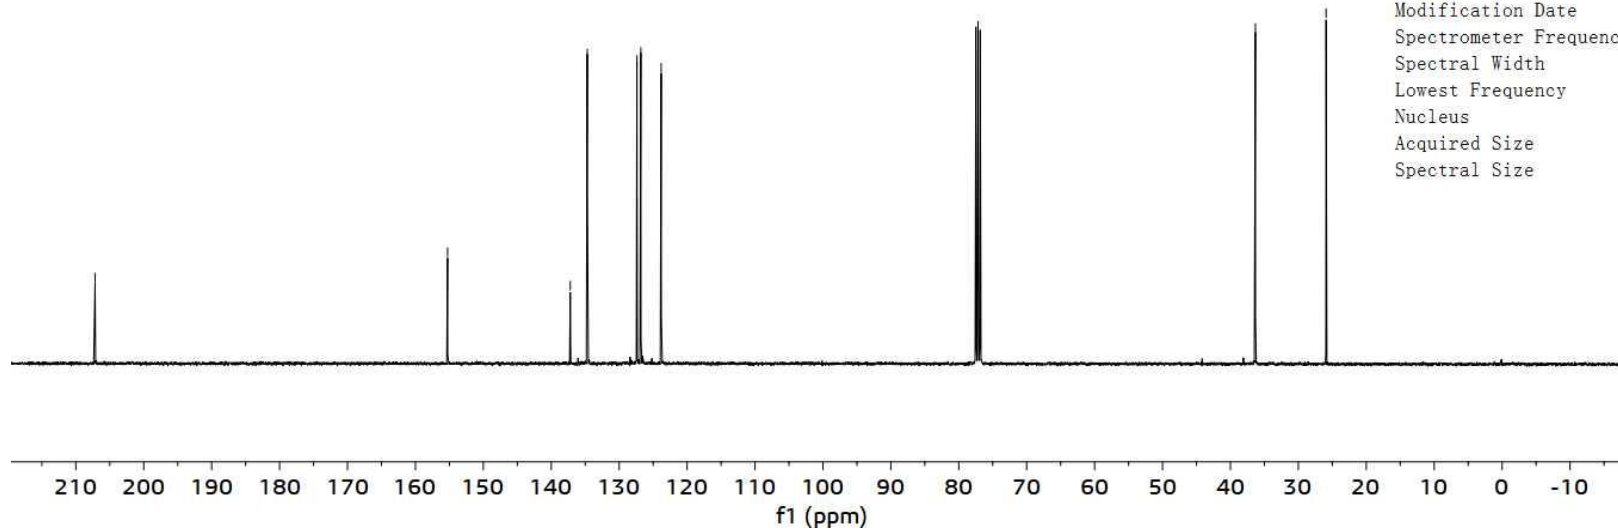

|                        |                     |
|------------------------|---------------------|
| Title                  | WYX-71-chanwu. 2. 1 |
| Origin                 | Bruker BioSpin GmbH |
| Owner                  | nmrsu               |
| Spectrometer           | spect               |
| Solvent                | CDC13               |
| Temperature            | 296. 9              |
| Pulse Sequence         | zgpg30              |
| Experiment             | 1D                  |
| Number of Scans        | 1024                |
| Receiver Gain          | 202                 |
| Relaxation Delay       | 2. 0000             |
| Pulse Width            | 10. 5800            |
| Acquisition Time       | 1. 3631             |
| Acquisition Date       | 2021-05-28T02:54:29 |
| Modification Date      | 2021-05-28T02:54:30 |
| Spectrometer Frequency | 100. 62             |
| Spectral Width         | 24038. 5            |
| Lowest Frequency       | -1947. 9            |
| Nucleus                | 13C                 |
| Acquired Size          | 32768               |
| Spectral Size          | 65536               |

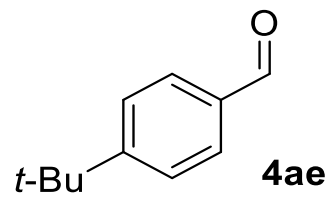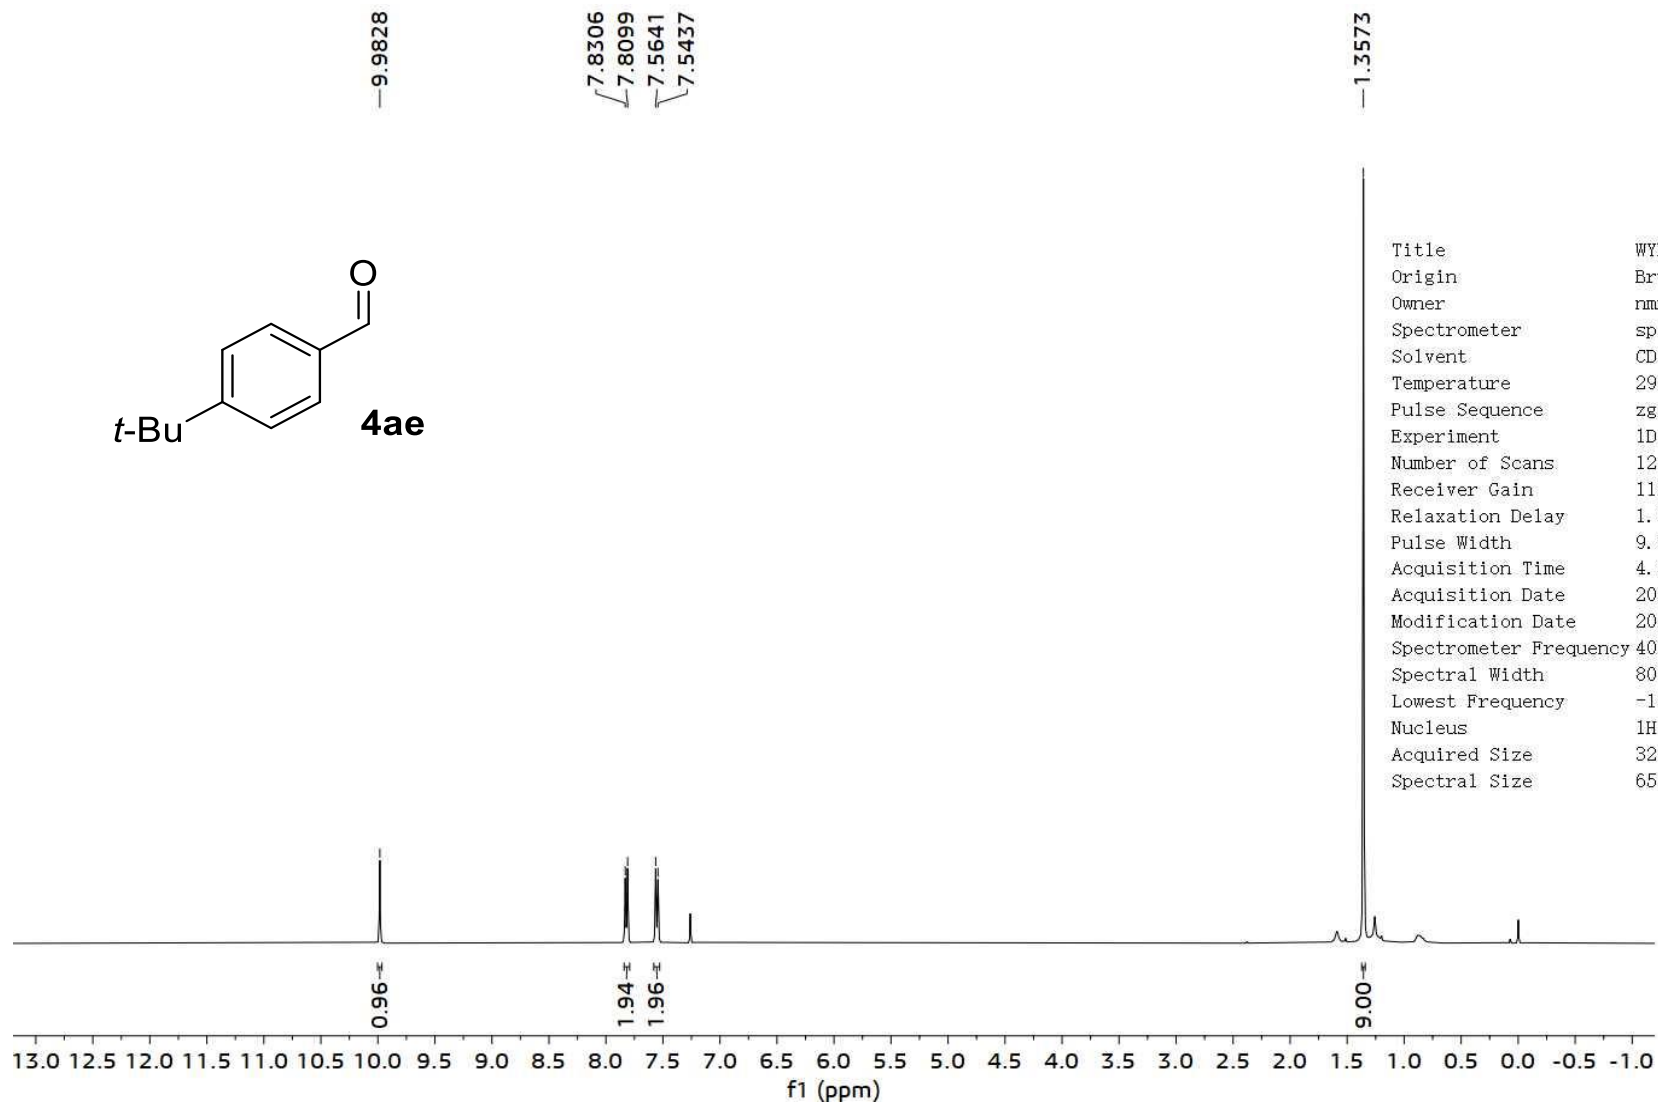

|                        |                     |
|------------------------|---------------------|
| Title                  | WYX-62chanwu.1.1    |
| Origin                 | Bruker BioSpin GmbH |
| Owner                  | nmrsu               |
| Spectrometer           | spect               |
| Solvent                | CDCl3               |
| Temperature            | 298.0               |
| Pulse Sequence         | zg30                |
| Experiment             | 1D                  |
| Number of Scans        | 12                  |
| Receiver Gain          | 112                 |
| Relaxation Delay       | 1.0000              |
| Pulse Width            | 9.7800              |
| Acquisition Time       | 4.0894              |
| Acquisition Date       | 2021-05-17T14:58:01 |
| Modification Date      | 2021-05-17T14:58:00 |
| Spectrometer Frequency | 400.15              |
| Spectral Width         | 8012.8              |
| Lowest Frequency       | -1546.5             |
| Nucleus                | 1H                  |
| Acquired Size          | 32768               |
| Spectral Size          | 65536               |



—192.20

—158.60

—134.23

—129.84

—126.14

—35.50

—31.22

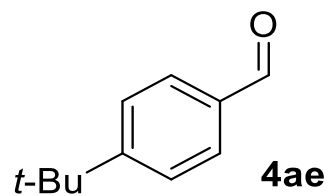

|                        |                     |
|------------------------|---------------------|
| Title                  | WYX-62chanwu. 2. 1  |
| Origin                 | Bruker BioSpin GmbH |
| Owner                  | nrsu                |
| Spectrometer           | spect               |
| Solvent                | CDC13               |
| Temperature            | 298.0               |
| Pulse Sequence         | zgpg30              |
| Experiment             | 1D                  |
| Number of Scans        | 300                 |
| Receiver Gain          | 202                 |
| Relaxation Delay       | 2.0000              |
| Pulse Width            | 10.5800             |
| Acquisition Time       | 1.3631              |
| Acquisition Date       | 2021-05-17T15:16:14 |
| Modification Date      | 2021-05-17T15:16:14 |
| Spectrometer Frequency | 100.62              |
| Spectral Width         | 24038.5             |
| Lowest Frequency       | -1944.4             |
| Nucleus                | 13C                 |
| Acquired Size          | 32768               |
| Spectral Size          | 65536               |

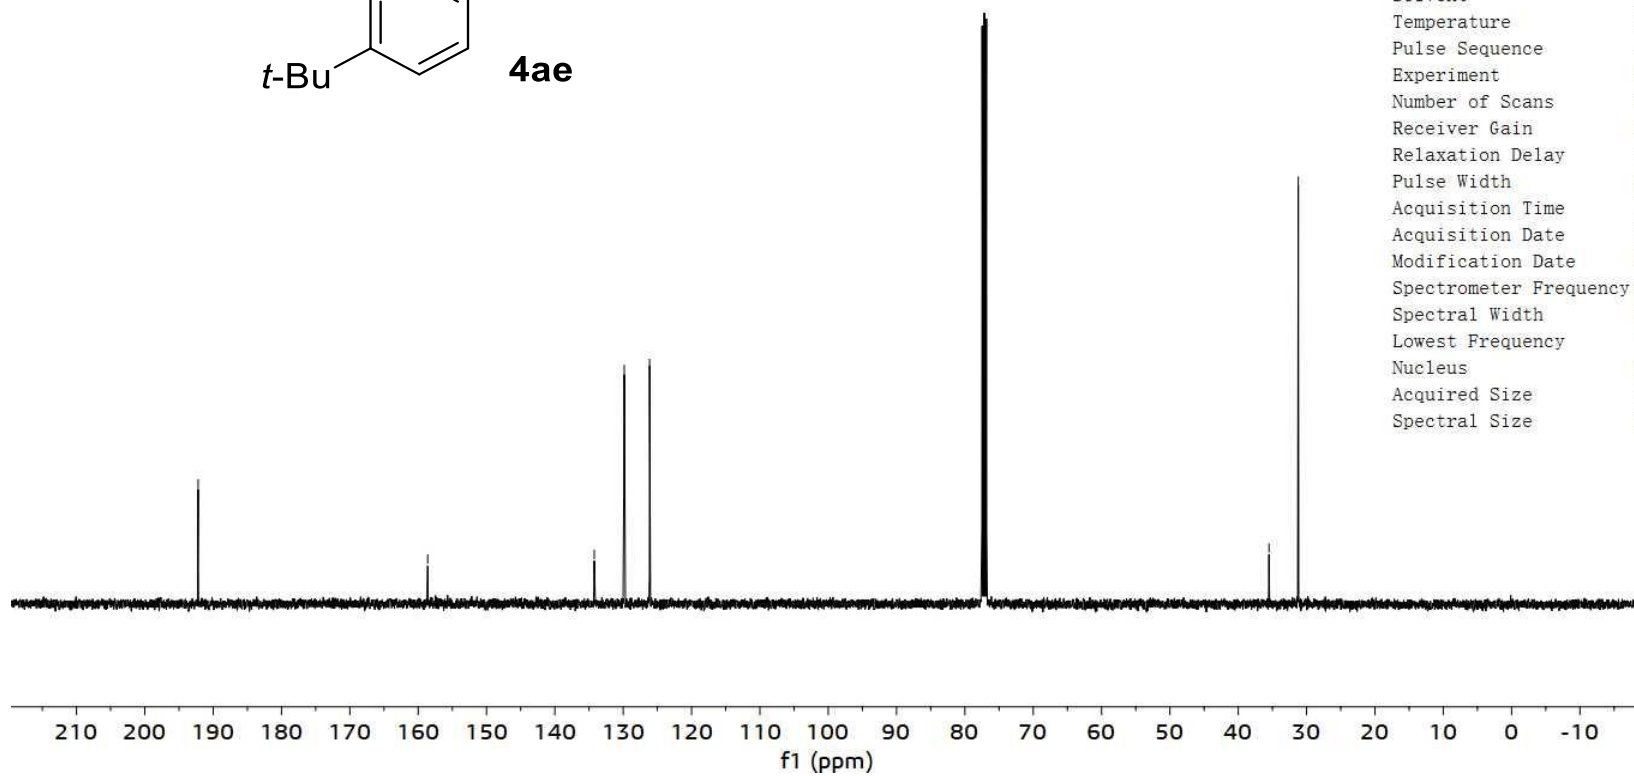

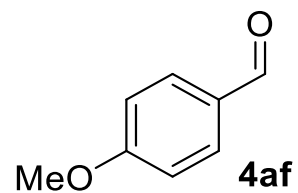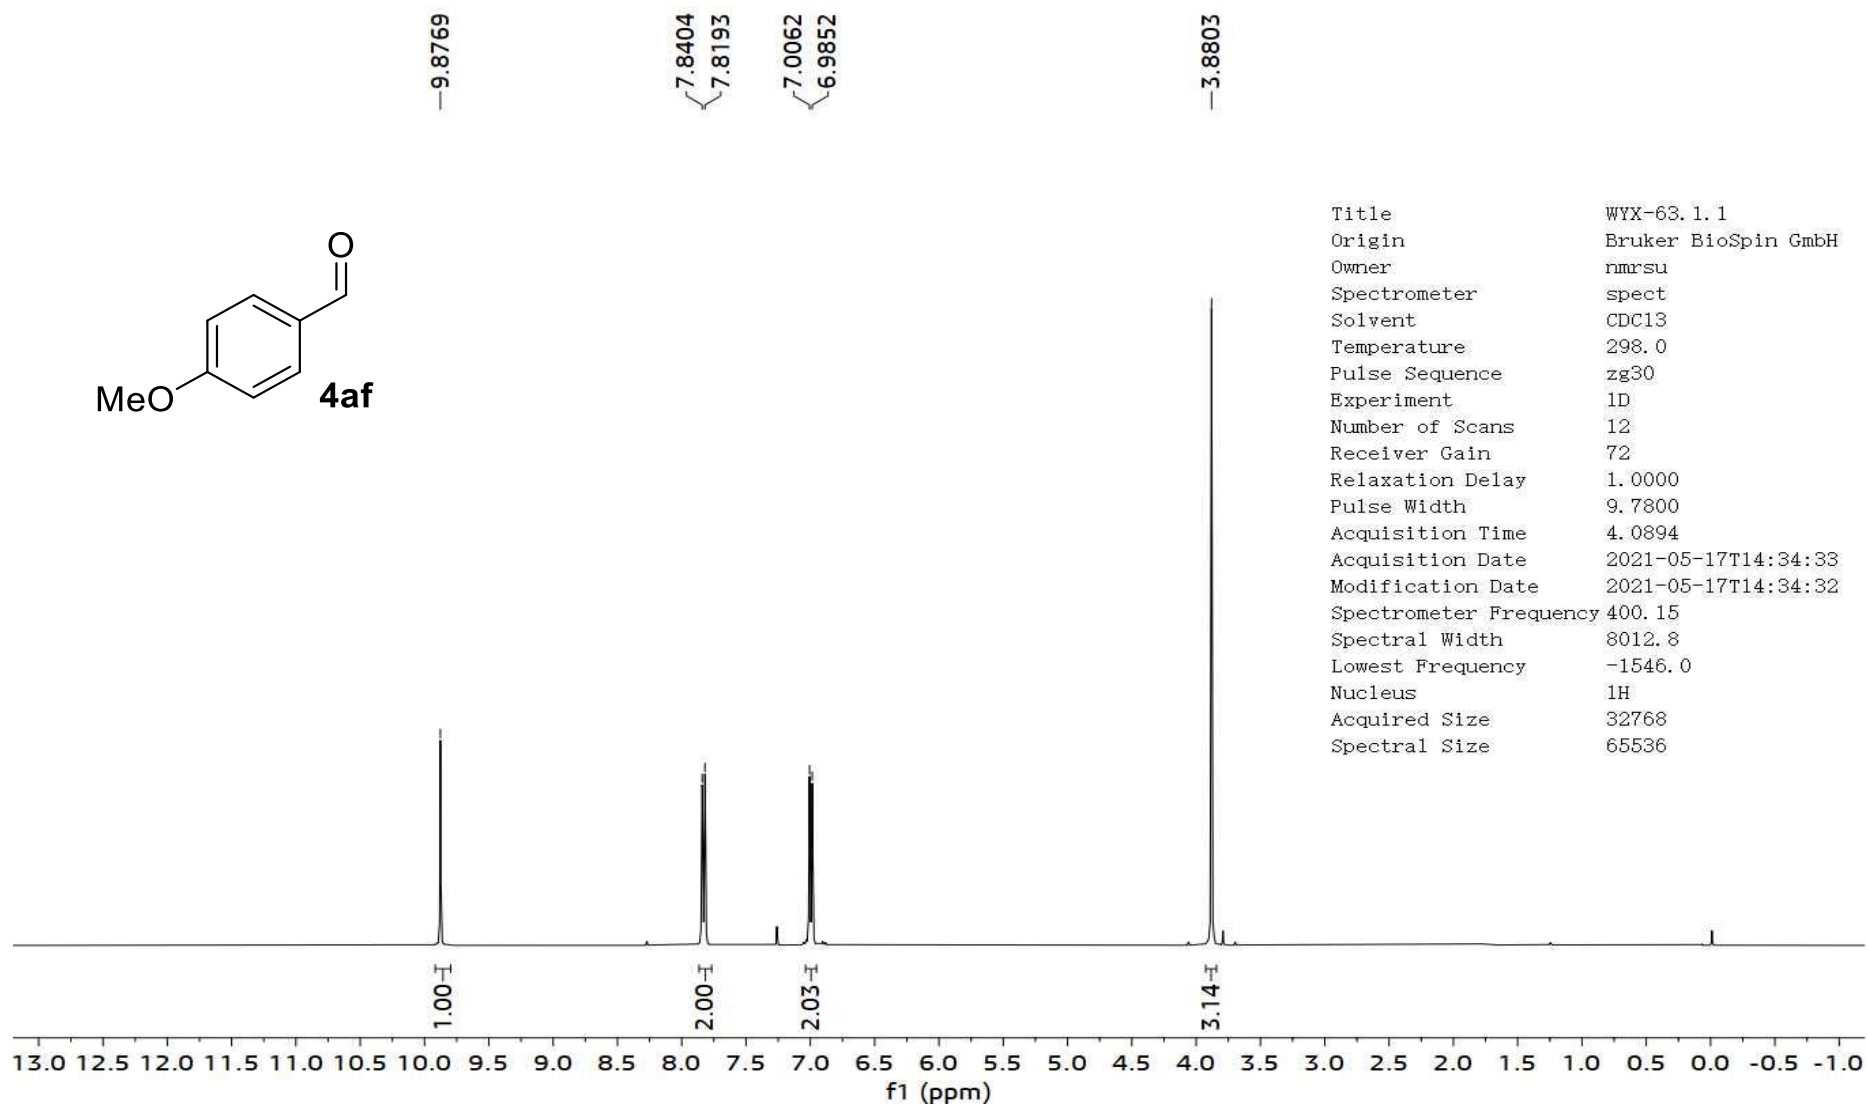

|                        |                     |
|------------------------|---------------------|
| Title                  | WYX-63. 1. 1        |
| Origin                 | Bruker BioSpin GmbH |
| Owner                  | nmrsu               |
| Spectrometer           | spect               |
| Solvent                | CDCl3               |
| Temperature            | 298.0               |
| Pulse Sequence         | zg30                |
| Experiment             | 1D                  |
| Number of Scans        | 12                  |
| Receiver Gain          | 72                  |
| Relaxation Delay       | 1.0000              |
| Pulse Width            | 9.7800              |
| Acquisition Time       | 4.0894              |
| Acquisition Date       | 2021-05-17T14:34:33 |
| Modification Date      | 2021-05-17T14:34:32 |
| Spectrometer Frequency | 400.15              |
| Spectral Width         | 8012.8              |
| Lowest Frequency       | -1546.0             |
| Nucleus                | 1H                  |
| Acquired Size          | 32768               |
| Spectral Size          | 65536               |

—190.93

—164.73

✓132.10

✓130.08

—114.43

—55.70

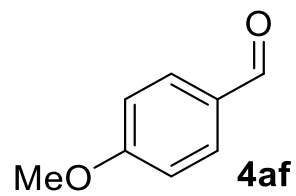

|                        |                     |
|------------------------|---------------------|
| Title                  | WYX-63. 2. 1        |
| Origin                 | Bruker BioSpin GmbH |
| Owner                  | nmrsu               |
| Spectrometer           | spect               |
| Solvent                | CDC13               |
| Temperature            | 298.0               |
| Pulse Sequence         | zgpg30              |
| Experiment             | 1D                  |
| Number of Scans        | 300                 |
| Receiver Gain          | 202                 |
| Relaxation Delay       | 2.0000              |
| Pulse Width            | 10.5800             |
| Acquisition Time       | 1.3631              |
| Acquisition Date       | 2021-05-17T14:52:46 |
| Modification Date      | 2021-05-17T14:52:46 |
| Spectrometer Frequency | 100.62              |
| Spectral Width         | 24038.5             |
| Lowest Frequency       | -1947.7             |
| Nucleus                | 13C                 |
| Acquired Size          | 32768               |
| Spectral Size          | 65536               |

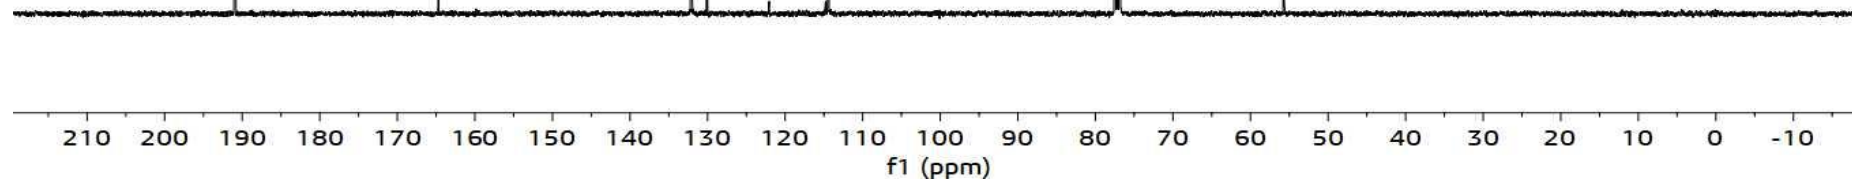

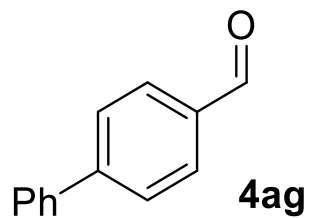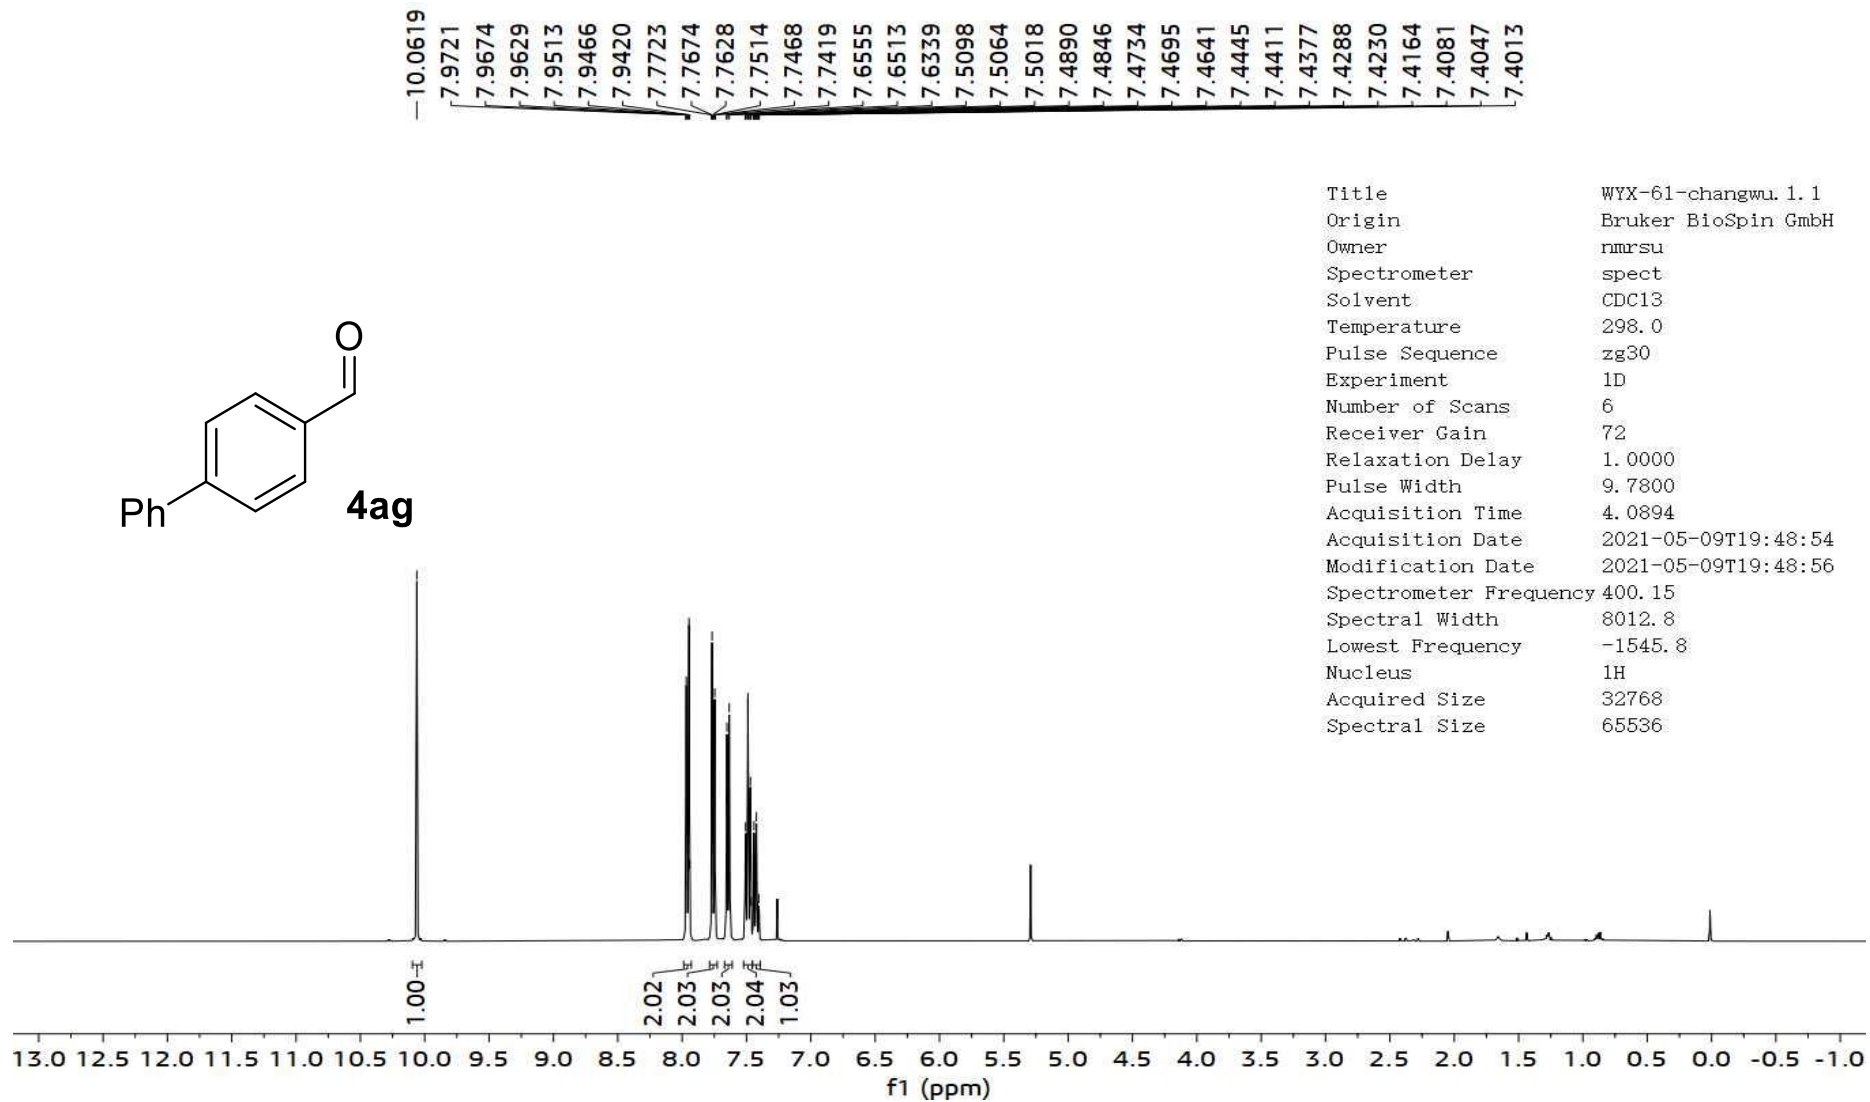

—192.02

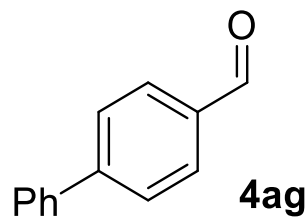

147.30  
139.83  
135.32  
130.38  
129.13  
128.59  
127.80  
127.48

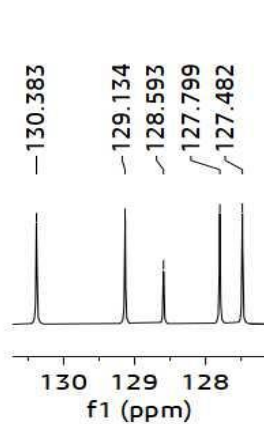

|                        |                      |
|------------------------|----------------------|
| Title                  | WYX-61-changwu. 2. 1 |
| Origin                 | Bruker BioSpin GmbH  |
| Owner                  | nmrsu                |
| Spectrometer           | spect                |
| Solvent                | CDC13                |
| Temperature            | 298.0                |
| Pulse Sequence         | zgpg30               |
| Experiment             | 1D                   |
| Number of Scans        | 1024                 |
| Receiver Gain          | 202                  |
| Relaxation Delay       | 2.0000               |
| Pulse Width            | 10.5800              |
| Acquisition Time       | 1.3631               |
| Acquisition Date       | 2021-05-09T20:48:28  |
| Modification Date      | 2021-05-09T20:48:30  |
| Spectrometer Frequency | 100.62               |
| Spectral Width         | 24038.5              |
| Lowest Frequency       | -1948.8              |
| Nucleus                | 13C                  |
| Acquired Size          | 32768                |
| Spectral Size          | 65536                |

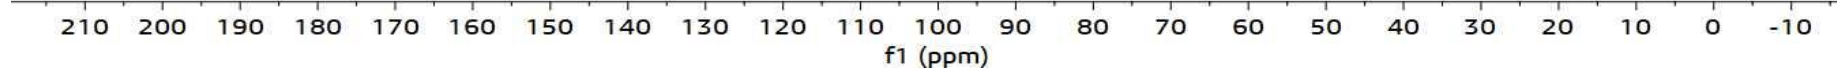

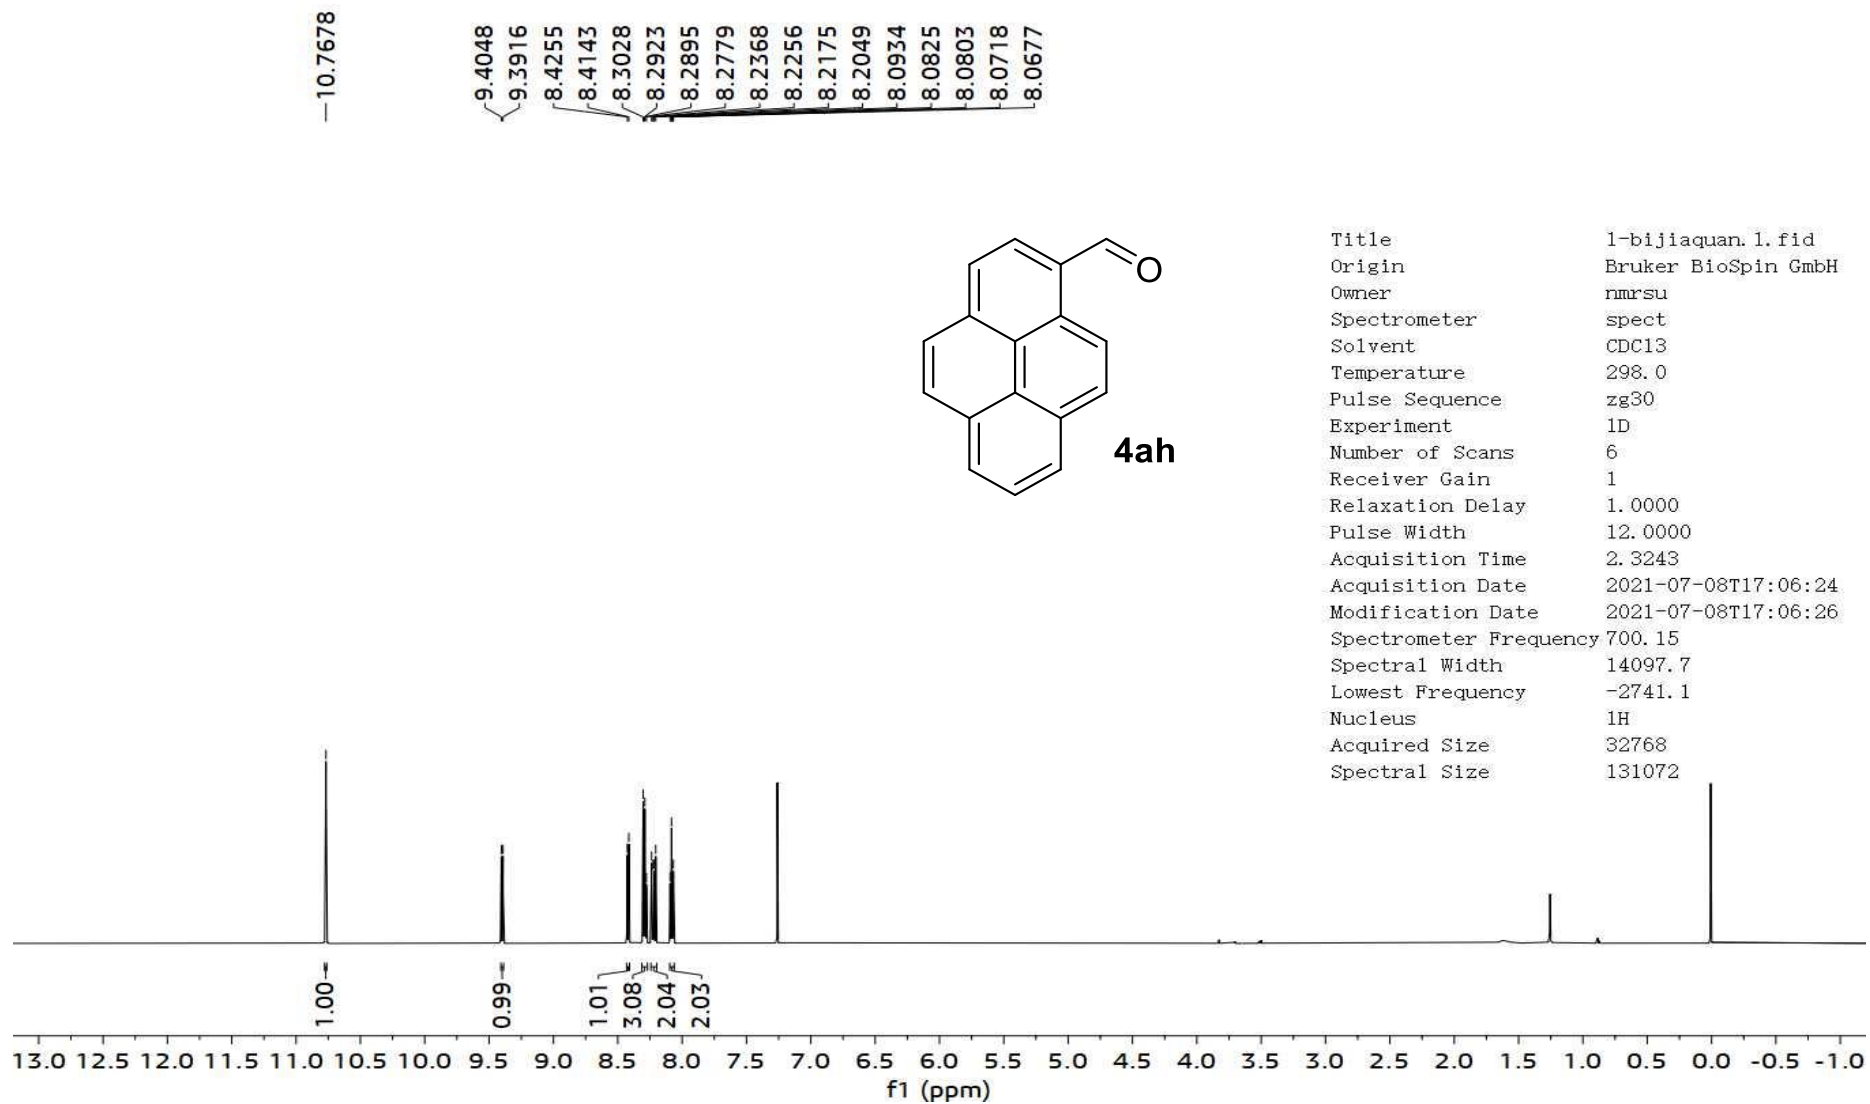

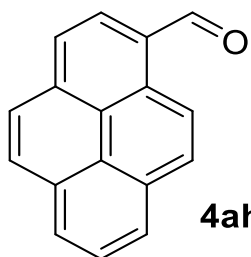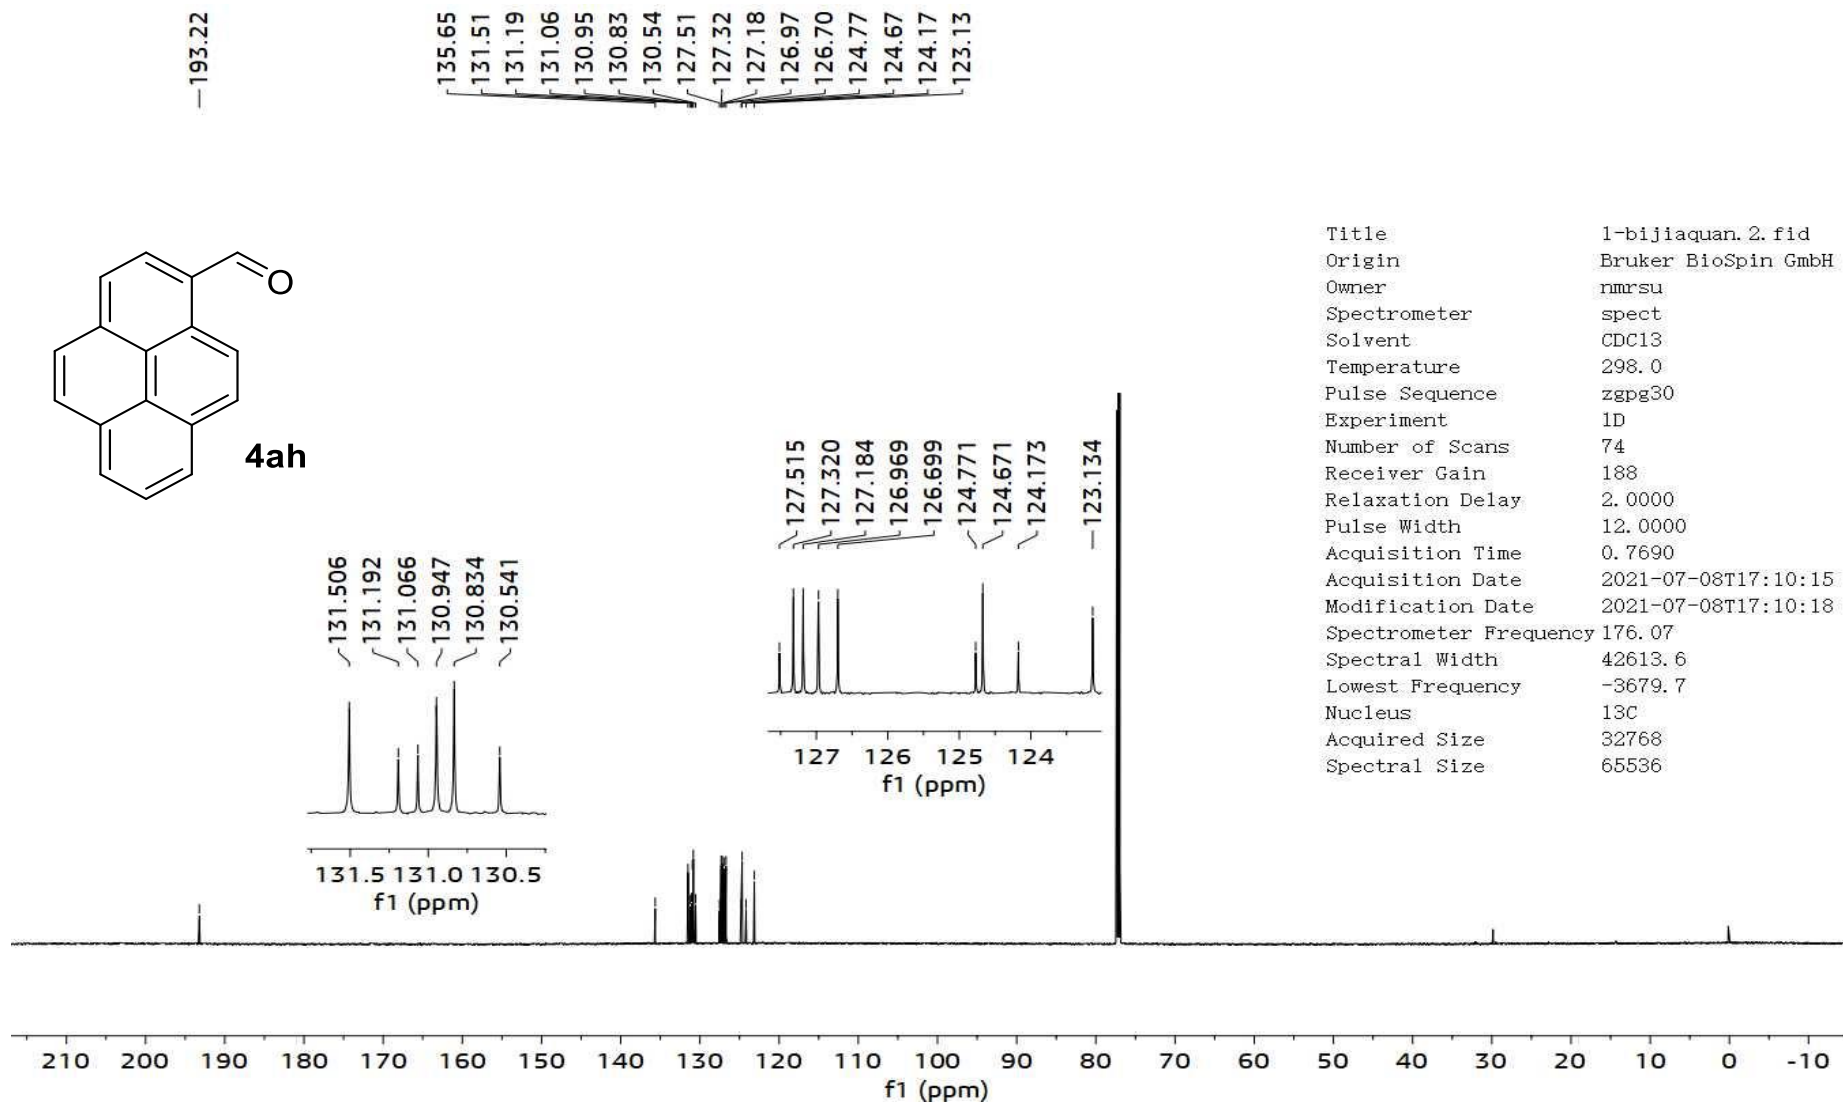

|                        |                     |
|------------------------|---------------------|
| Title                  | 1-bijiaquan.2.fid   |
| Origin                 | Bruker BioSpin GmbH |
| Owner                  | nmrsu               |
| Spectrometer           | spect               |
| Solvent                | CDC13               |
| Temperature            | 298.0               |
| Pulse Sequence         | zgpg30              |
| Experiment             | 1D                  |
| Number of Scans        | 74                  |
| Receiver Gain          | 188                 |
| Relaxation Delay       | 2.0000              |
| Pulse Width            | 12.0000             |
| Acquisition Time       | 0.7690              |
| Acquisition Date       | 2021-07-08T17:10:15 |
| Modification Date      | 2021-07-08T17:10:18 |
| Spectrometer Frequency | 176.07              |
| Spectral Width         | 42613.6             |
| Lowest Frequency       | -3679.7             |
| Nucleus                | 13C                 |
| Acquired Size          | 32768               |
| Spectral Size          | 65536               |

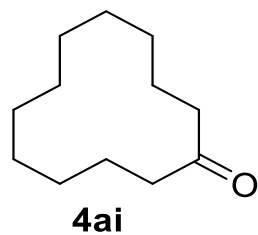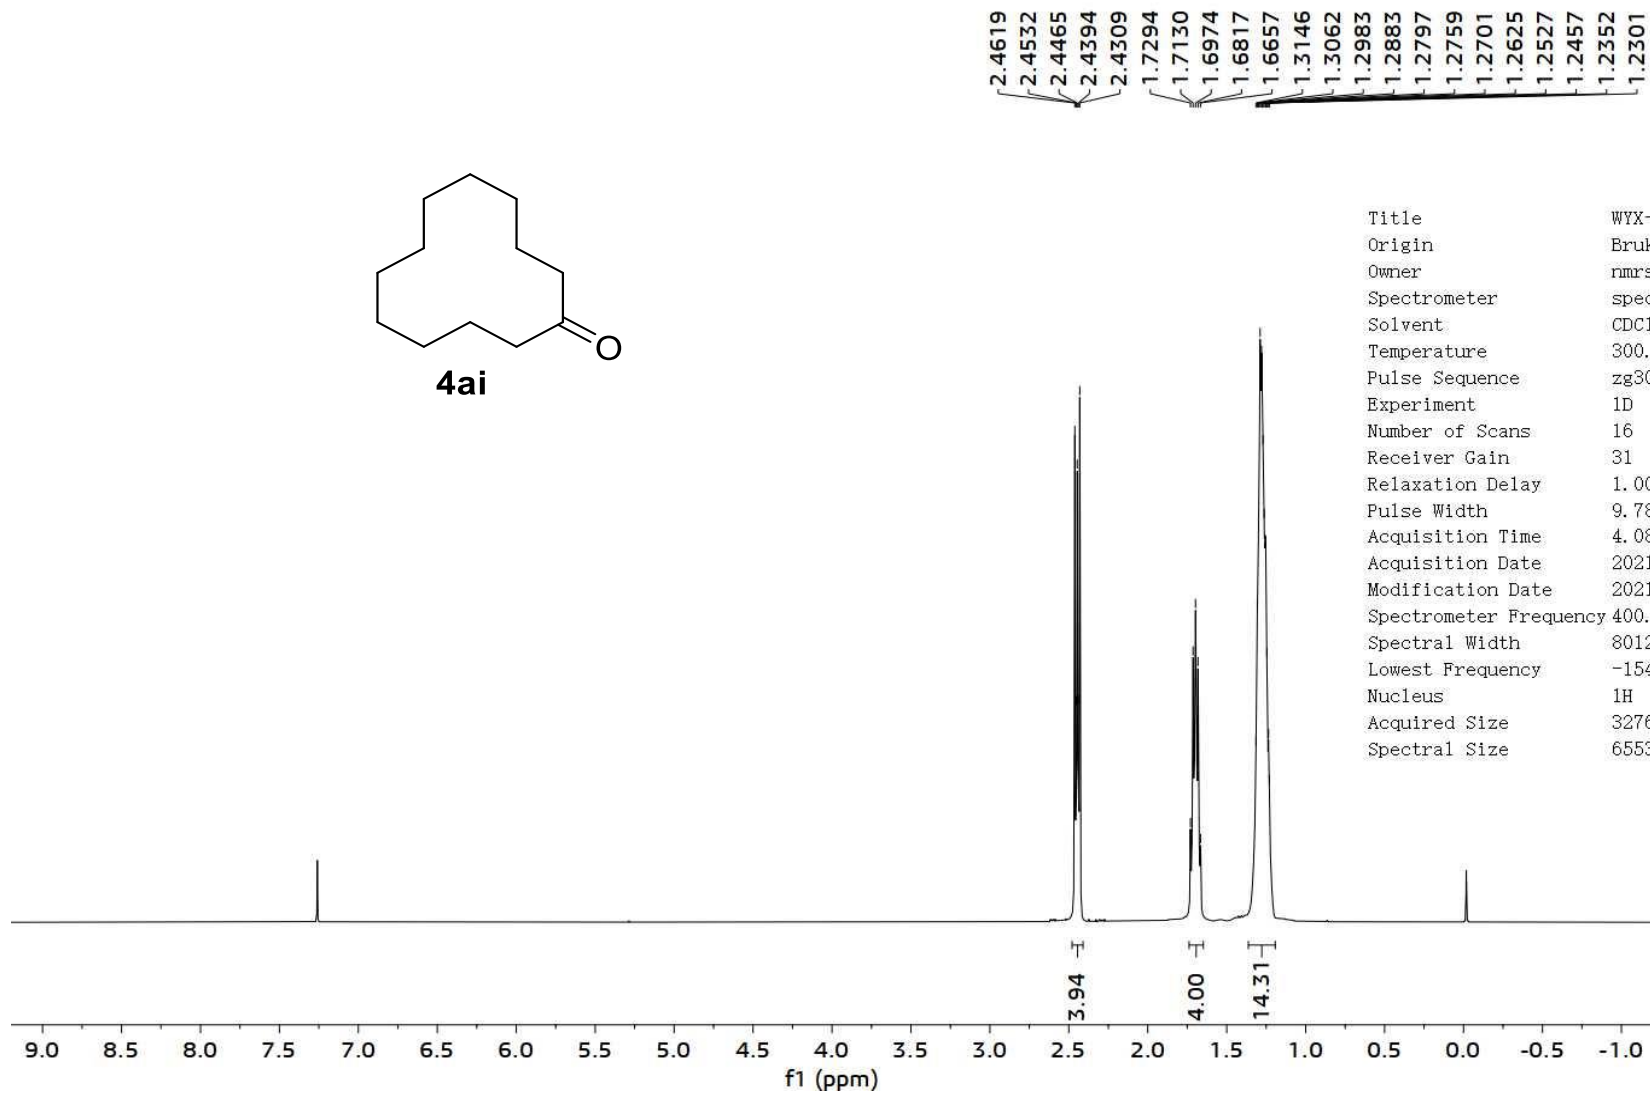



-212.73

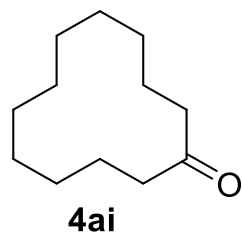

-40.36  
24.76  
24.62  
24.24  
22.56  
22.37

|                        |                      |
|------------------------|----------------------|
| Title                  | WYX-81chanwu. 2. fid |
| Origin                 | Bruker BioSpin GmbH  |
| Owner                  | nmsu                 |
| Spectrometer           | spect                |
| Solvent                | CDC13                |
| Temperature            | 299.9                |
| Pulse Sequence         | zgpg30               |
| Experiment             | 1D                   |
| Number of Scans        | 1024                 |
| Receiver Gain          | 202                  |
| Relaxation Delay       | 2.0000               |
| Pulse Width            | 10.5800              |
| Acquisition Time       | 1.3631               |
| Acquisition Date       | 2021-07-15T21:24:01  |
| Modification Date      | 2021-07-15T21:24:00  |
| Spectrometer Frequency | 100.63               |
| Spectral Width         | 24038.5              |
| Lowest Frequency       | -1951.9              |
| Nucleus                | 13C                  |
| Acquired Size          | 32768                |
| Spectral Size          | 65536                |

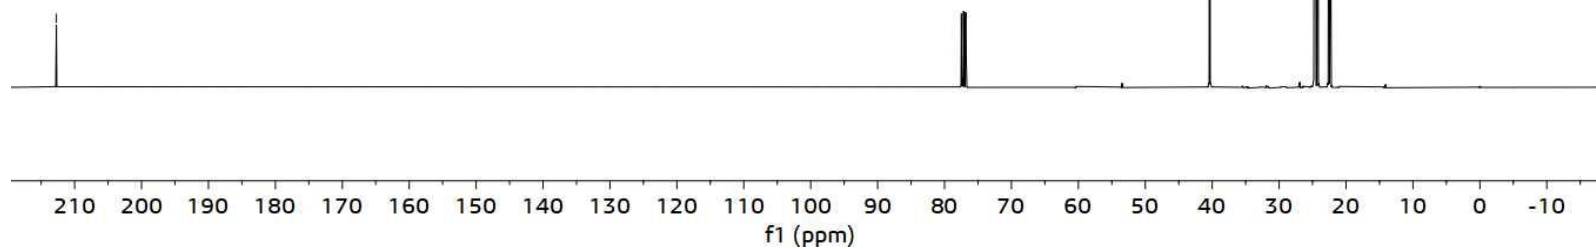

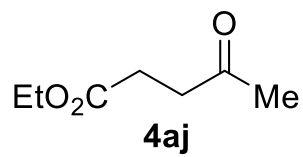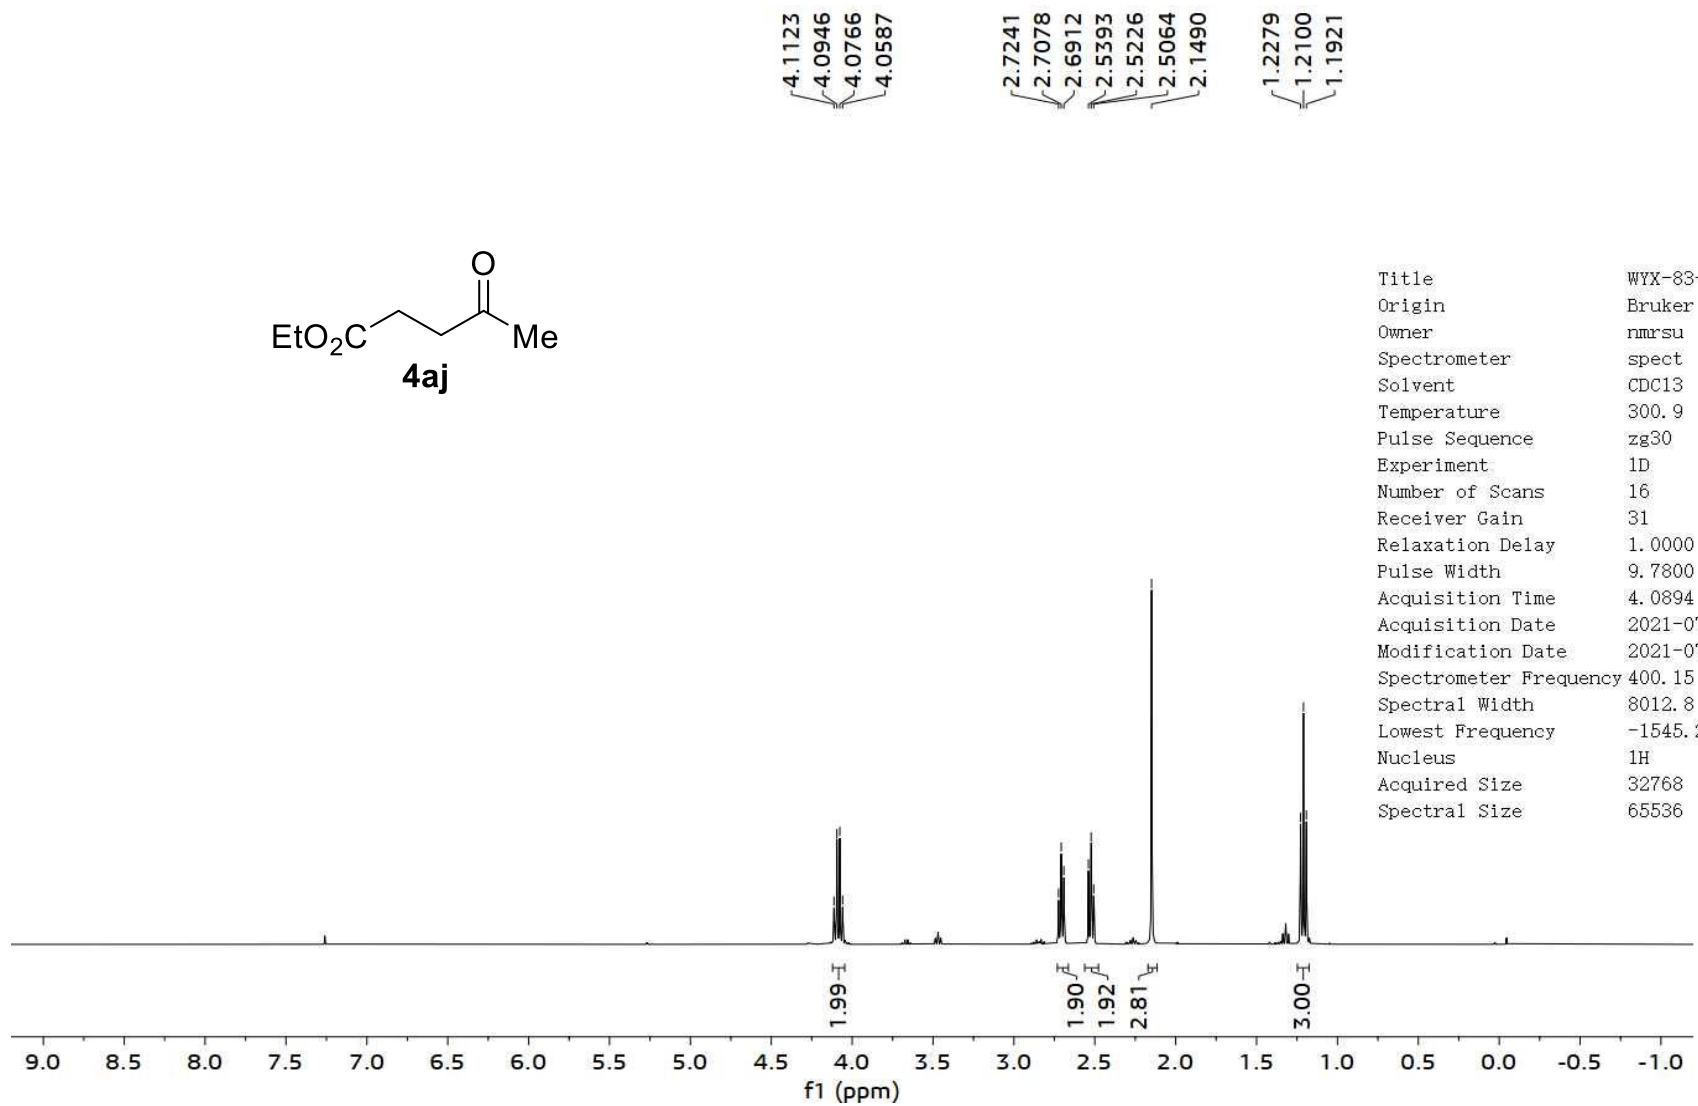

|                        |                     |
|------------------------|---------------------|
| Title                  | WYX-83-charwu.1.fid |
| Origin                 | Bruker BioSpin GmbH |
| Owner                  | nmrsu               |
| Spectrometer           | spect               |
| Solvent                | CDCl3               |
| Temperature            | 300.9               |
| Pulse Sequence         | zg30                |
| Experiment             | 1D                  |
| Number of Scans        | 16                  |
| Receiver Gain          | 31                  |
| Relaxation Delay       | 1.0000              |
| Pulse Width            | 9.7800              |
| Acquisition Time       | 4.0894              |
| Acquisition Date       | 2021-07-21T01:50:28 |
| Modification Date      | 2021-07-21T01:50:30 |
| Spectrometer Frequency | 400.15              |
| Spectral Width         | 8012.8              |
| Lowest Frequency       | -1545.2             |
| Nucleus                | 1H                  |
| Acquired Size          | 32768               |
| Spectral Size          | 65536               |

—206.75

—172.80

—60.66

—38.00  
—29.90  
—28.08

—14.21

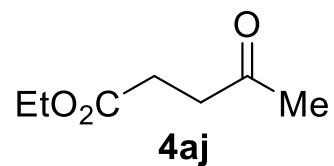

|                        |                     |
|------------------------|---------------------|
| Title                  | WYX-83-chanwu.2.fid |
| Origin                 | Bruker BioSpin GmbH |
| Owner                  | nmsu                |
| Spectrometer           | spect               |
| Solvent                | CDCl3               |
| Temperature            | 301.5               |
| Pulse Sequence         | zgpg30              |
| Experiment             | 1D                  |
| Number of Scans        | 750                 |
| Receiver Gain          | 202                 |
| Relaxation Delay       | 2.0000              |
| Pulse Width            | 10.5800             |
| Acquisition Time       | 1.3631              |
| Acquisition Date       | 2021-07-21T02:34:23 |
| Modification Date      | 2021-07-21T02:34:24 |
| Spectrometer Frequency | 100.63              |
| Spectral Width         | 24038.5             |
| Lowest Frequency       | -1948.6             |
| Nucleus                | 13C                 |
| Acquired Size          | 32768               |
| Spectral Size          | 65536               |

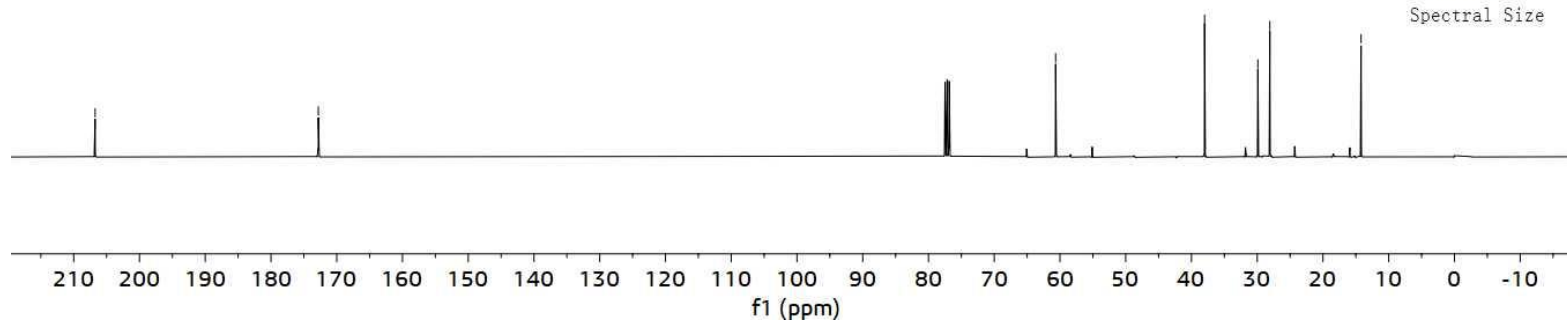

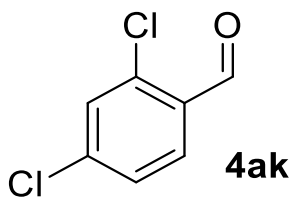

10.3813

7.8497  
7.8286  
7.4433  
7.3553  
7.3344

|                        |                       |
|------------------------|-----------------------|
| Title                  | WYX-82-fuchanwu.1.fid |
| Origin                 | Bruker BioSpin GmbH   |
| Owner                  | nmrsu                 |
| Spectrometer           | spect                 |
| Solvent                | CDC13                 |
| Temperature            | 299.3                 |
| Pulse Sequence         | zg30                  |
| Experiment             | 1D                    |
| Number of Scans        | 16                    |
| Receiver Gain          | 53                    |
| Relaxation Delay       | 1.0000                |
| Pulse Width            | 9.7800                |
| Acquisition Time       | 4.0894                |
| Acquisition Date       | 2021-07-17T10:46:19   |
| Modification Date      | 2021-07-17T10:46:20   |
| Spectrometer Frequency | 400.15                |
| Spectral Width         | 8012.8                |
| Lowest Frequency       | -1545.6               |
| Nucleus                | 1H                    |
| Acquired Size          | 32768                 |
| Spectral Size          | 65536                 |

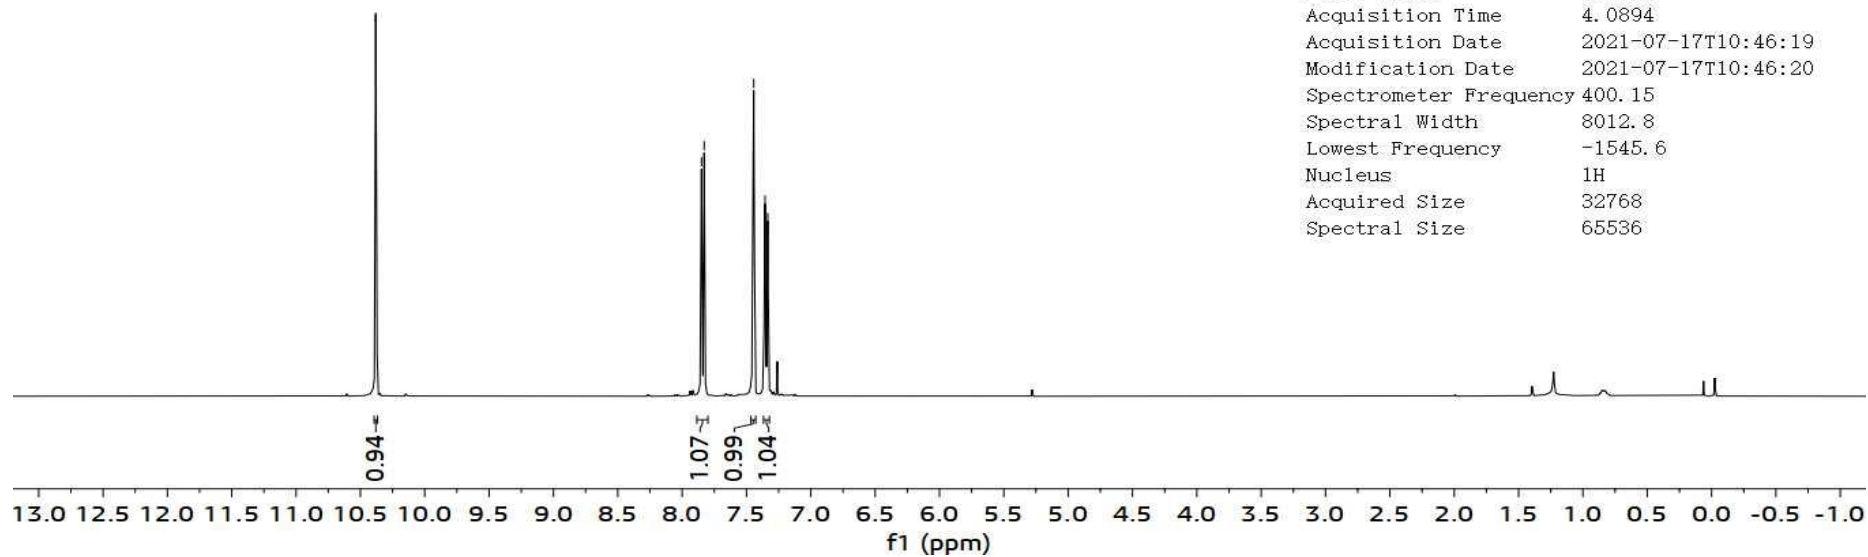

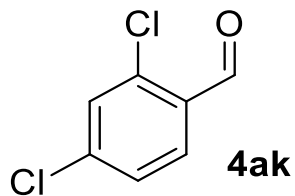

—188.52

141.16  
138.59  
131.03  
130.52  
130.40  
128.03

|                        |                         |
|------------------------|-------------------------|
| Title                  | WYX-82-fuchanwu. 2. fid |
| Origin                 | Bruker BioSpin GmbH     |
| Owner                  | nmrsu                   |
| Spectrometer           | spect                   |
| Solvent                | CDC13                   |
| Temperature            | 300.0                   |
| Pulse Sequence         | zgpg30                  |
| Experiment             | 1D                      |
| Number of Scans        | 322                     |
| Receiver Gain          | 202                     |
| Relaxation Delay       | 2.0000                  |
| Pulse Width            | 10.5800                 |
| Acquisition Time       | 1.3631                  |
| Acquisition Date       | 2021-07-17T11:05:48     |
| Modification Date      | 2021-07-17T11:05:50     |
| Spectrometer Frequency | 100.63                  |
| Spectral Width         | 24038.5                 |
| Lowest Frequency       | -1948.6                 |
| Nucleus                | 13C                     |
| Acquired Size          | 32768                   |
| Spectral Size          | 65536                   |

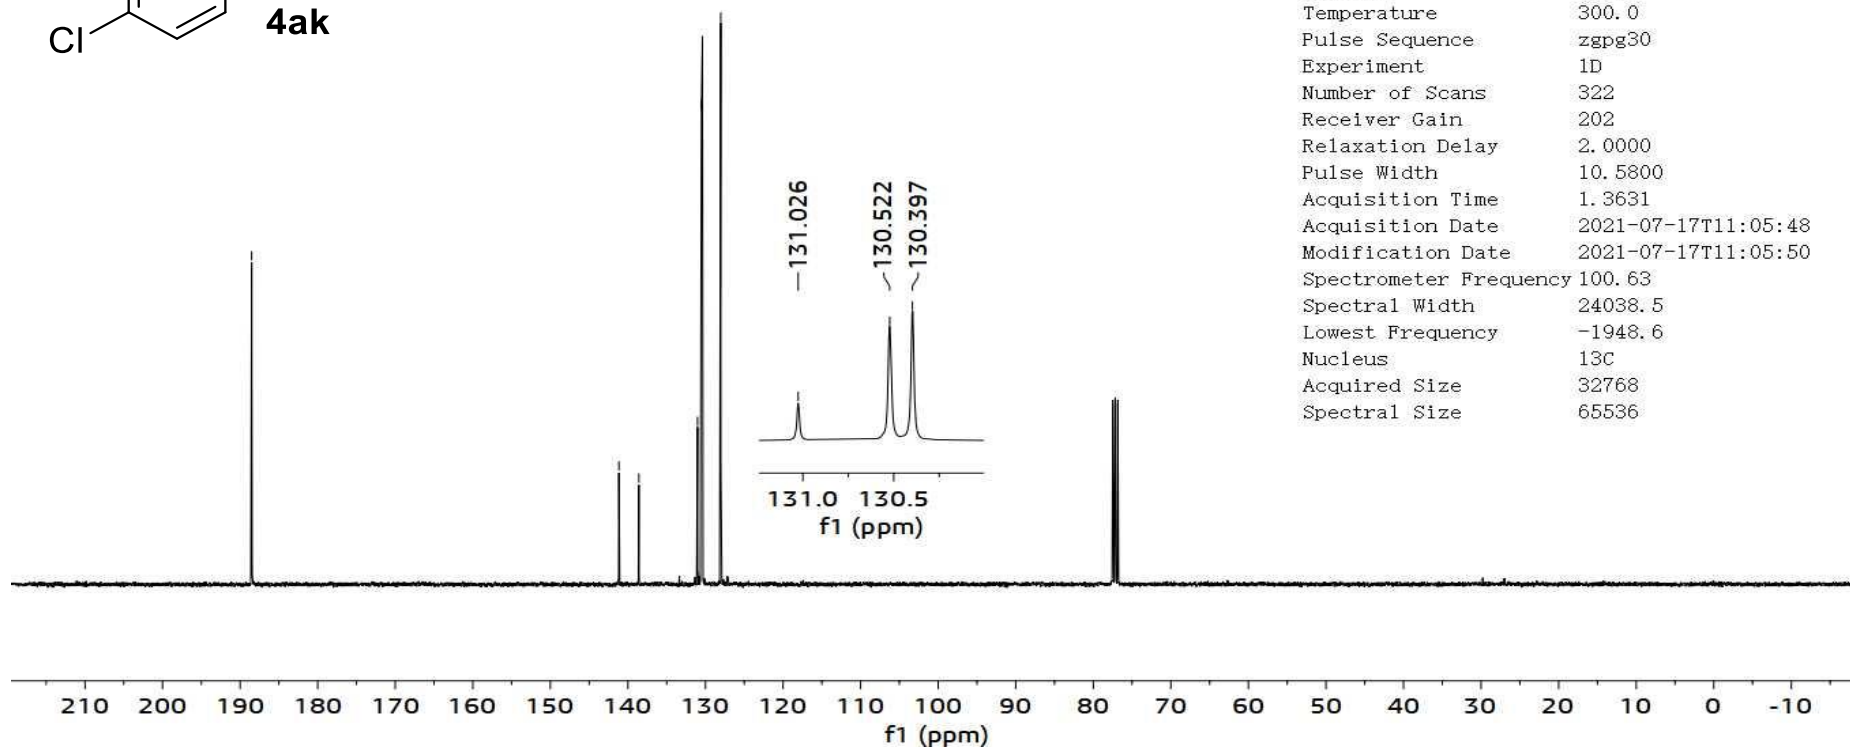

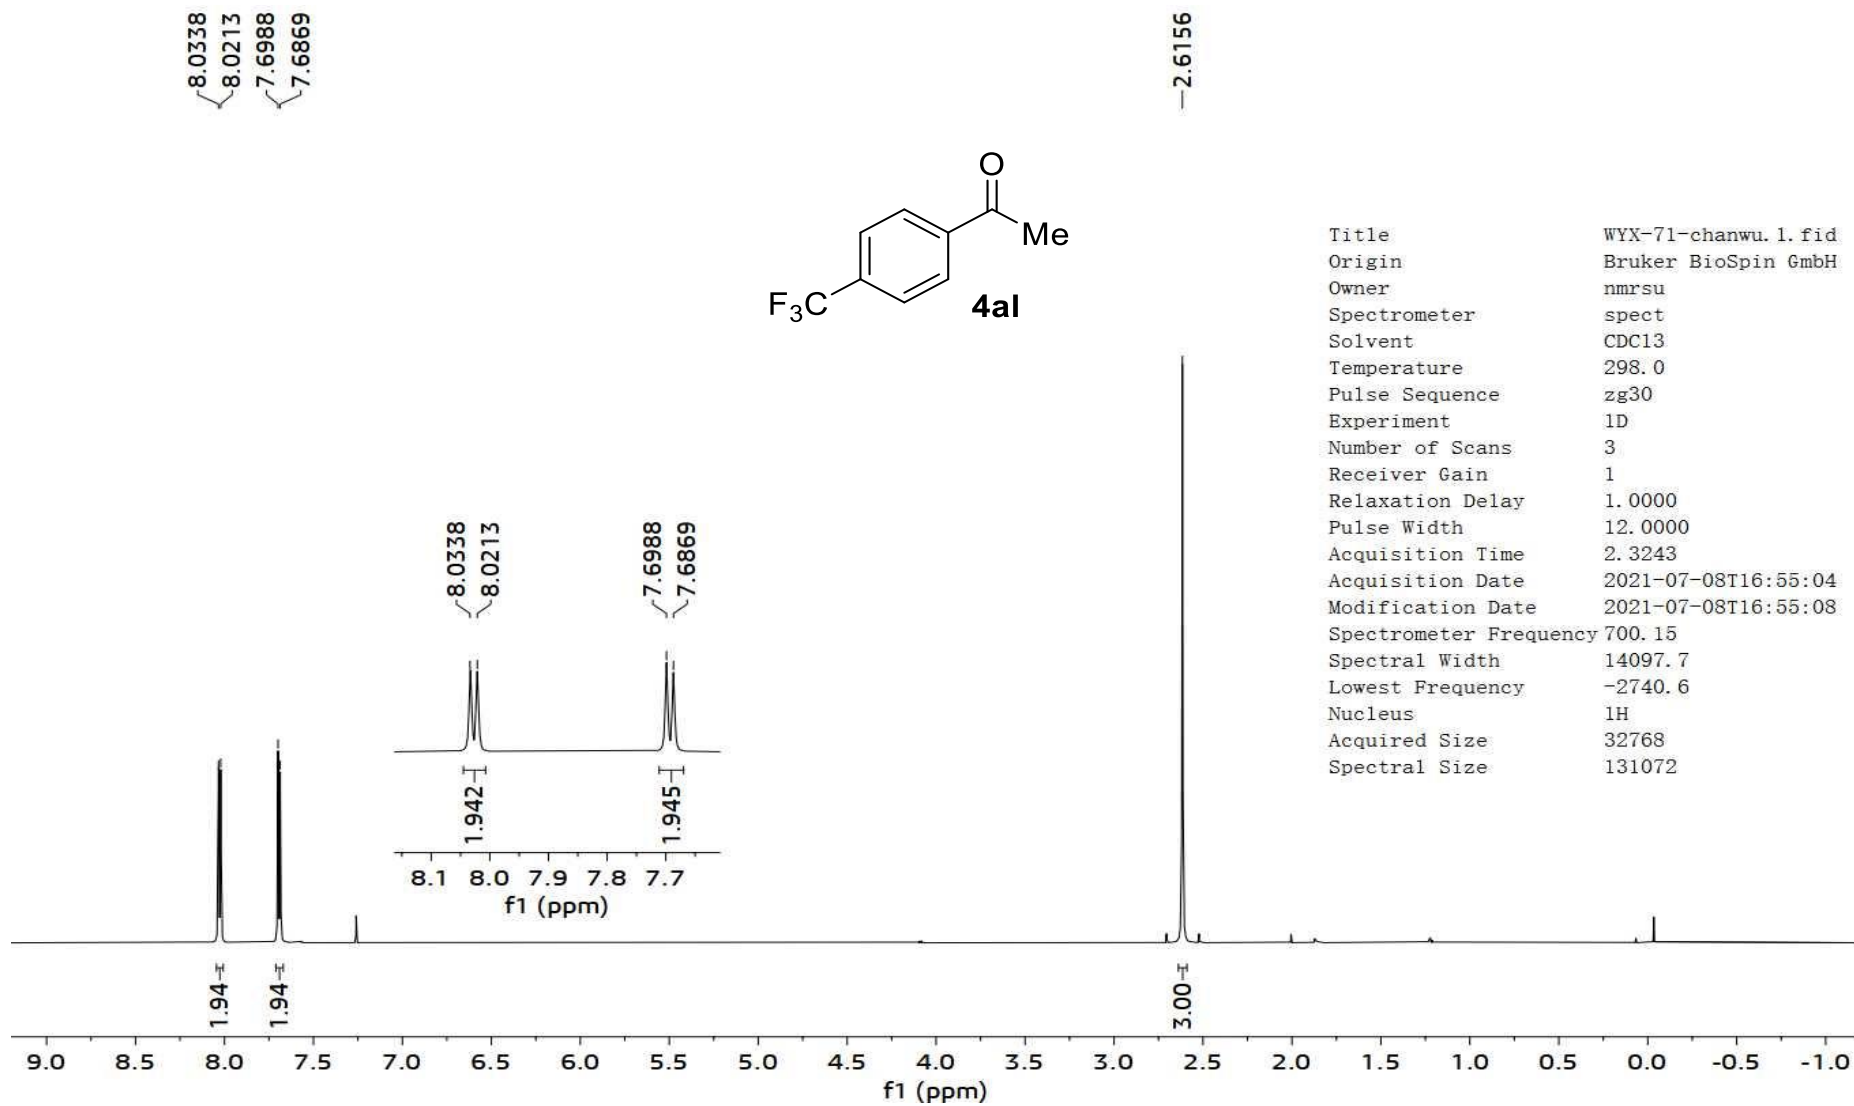

|                        |                     |
|------------------------|---------------------|
| Title                  | WYX-71-ghanwu.1.fid |
| Origin                 | Bruker BioSpin GmbH |
| Owner                  | nmrsu               |
| Spectrometer           | spect               |
| Solvent                | CDC13               |
| Temperature            | 298.0               |
| Pulse Sequence         | zg30                |
| Experiment             | 1D                  |
| Number of Scans        | 3                   |
| Receiver Gain          | 1                   |
| Relaxation Delay       | 1.0000              |
| Pulse Width            | 12.0000             |
| Acquisition Time       | 2.3243              |
| Acquisition Date       | 2021-07-08T16:55:04 |
| Modification Date      | 2021-07-08T16:55:08 |
| Spectrometer Frequency | 700.15              |
| Spectral Width         | 14097.7             |
| Lowest Frequency       | -2740.6             |
| Nucleus                | <sup>1</sup> H      |
| Acquired Size          | 32768               |
| Spectral Size          | 131072              |

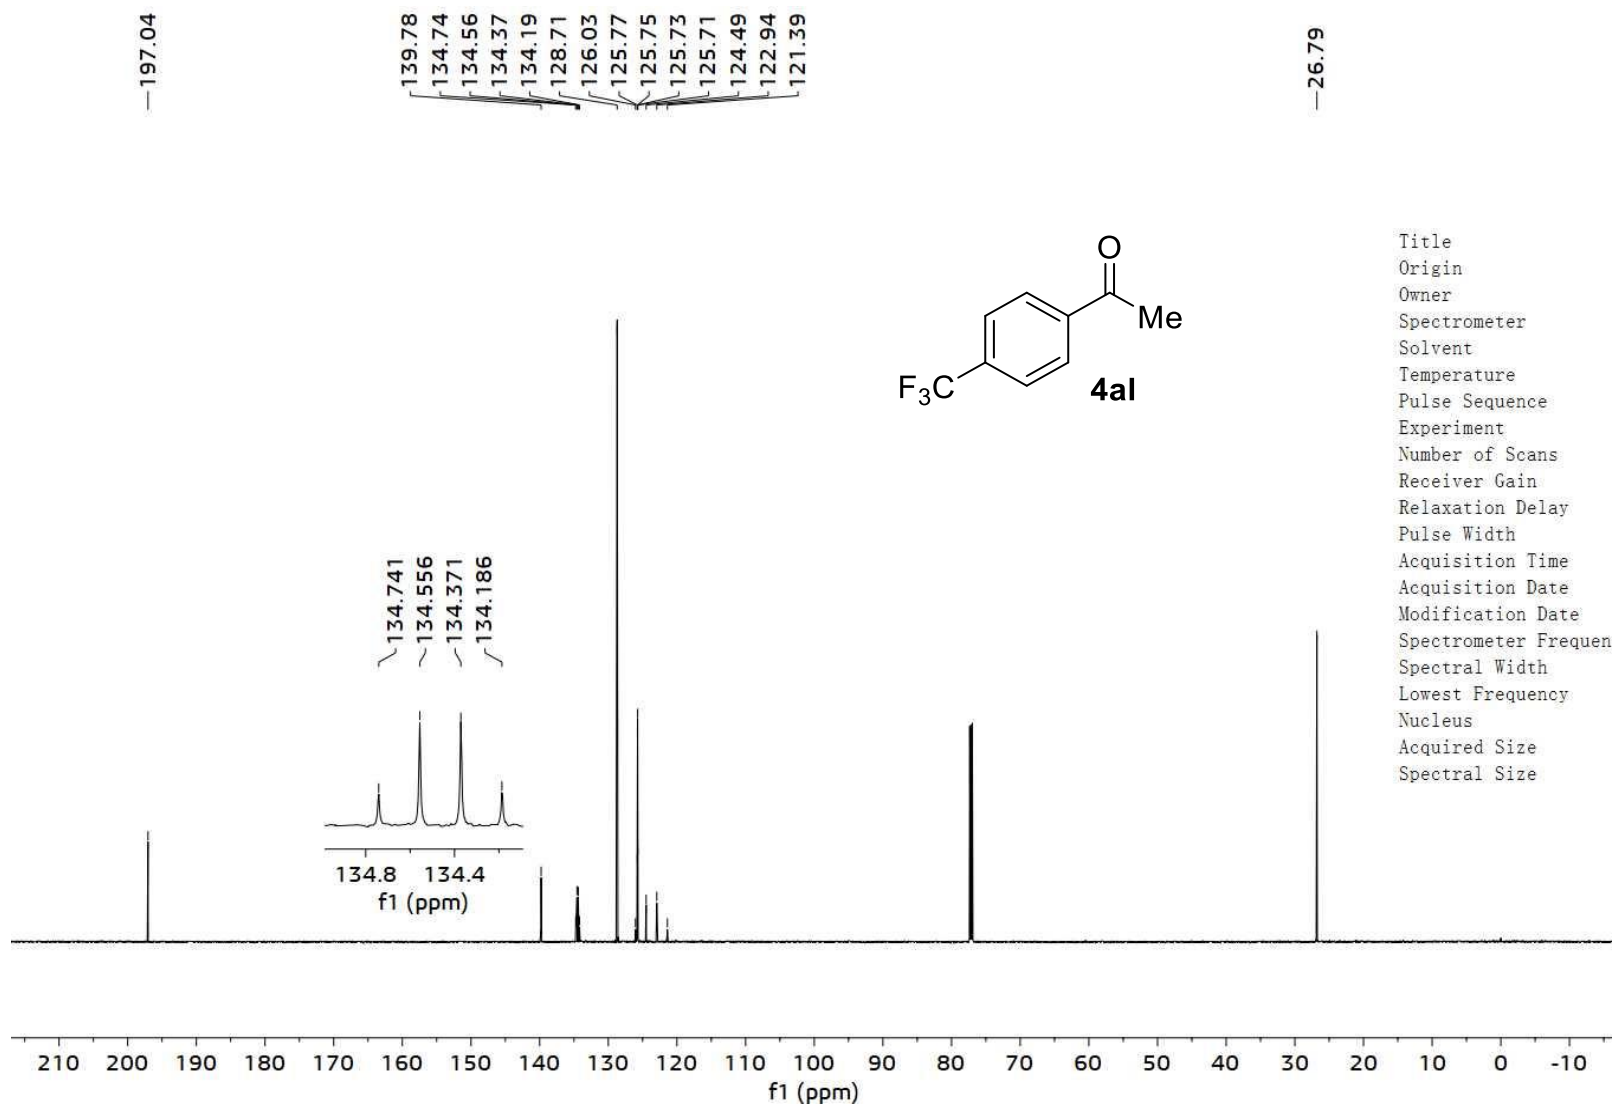

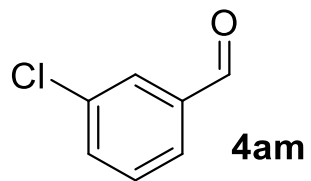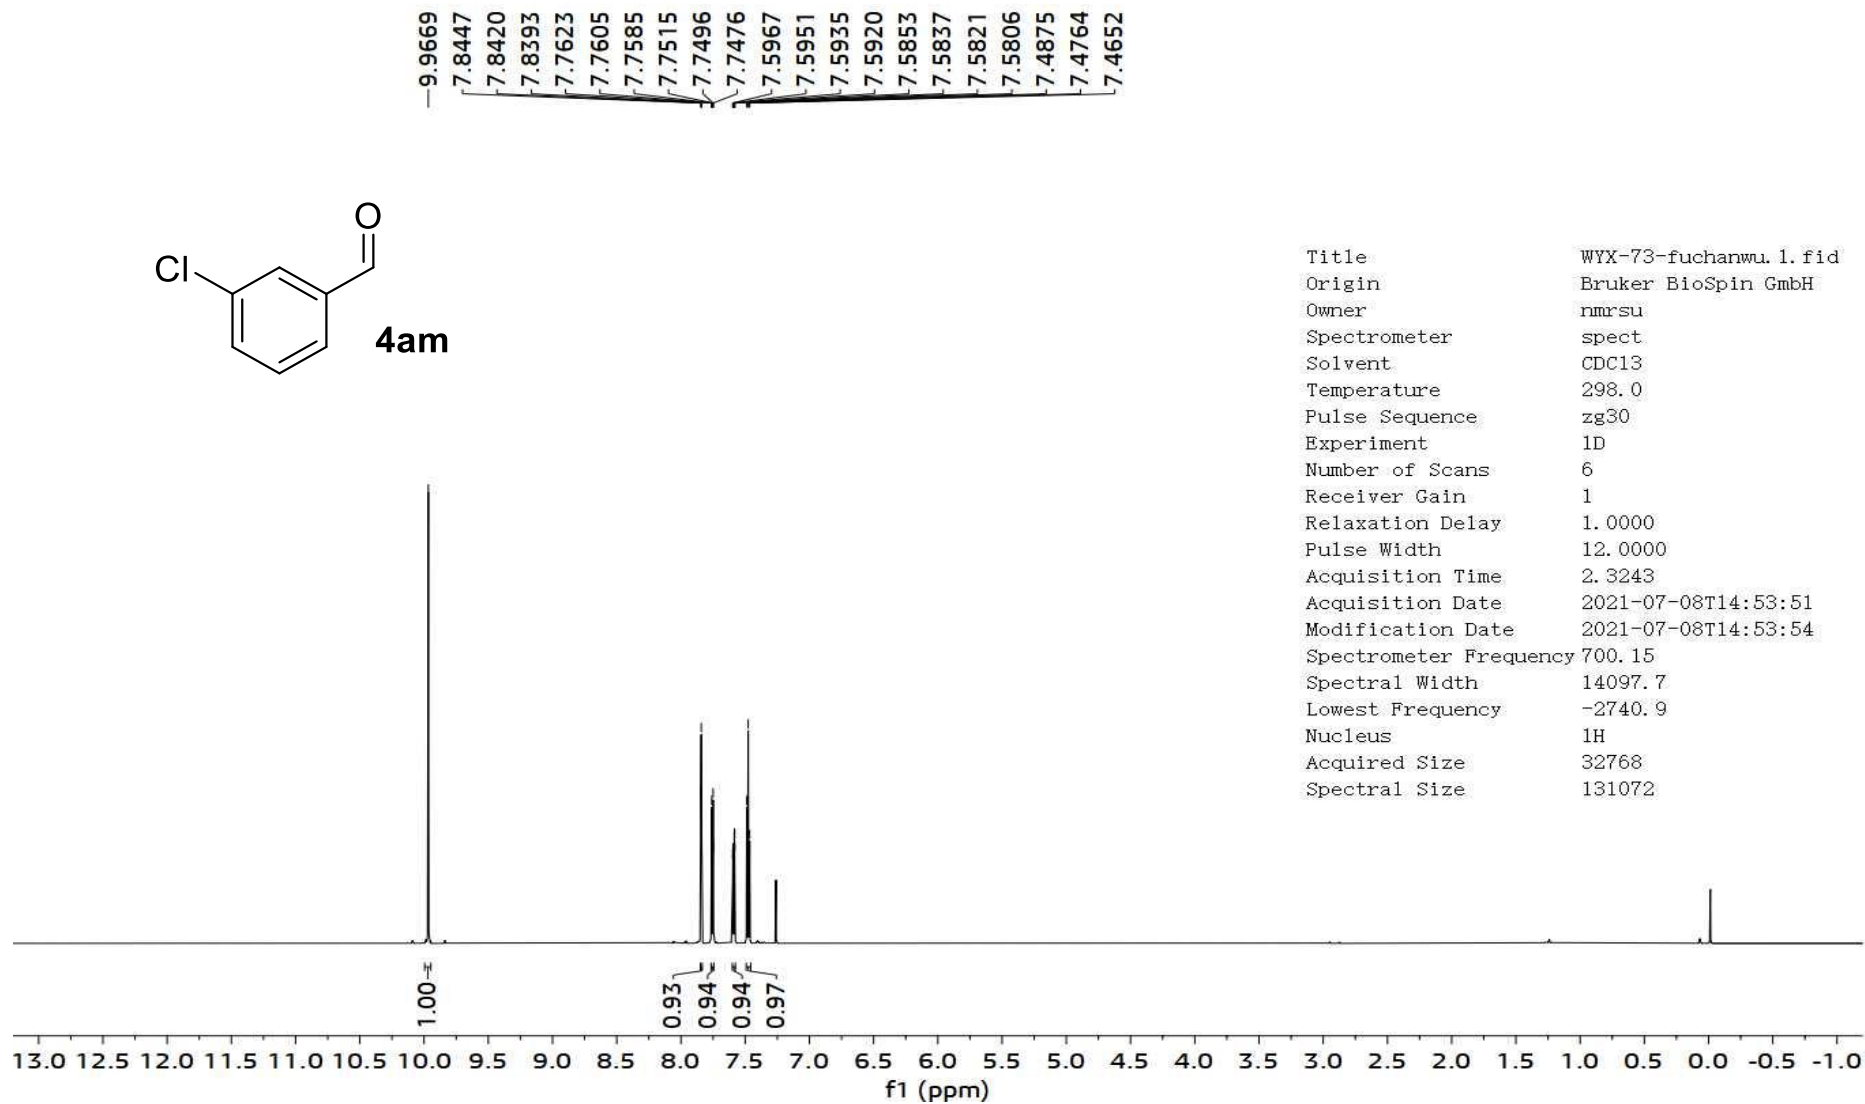



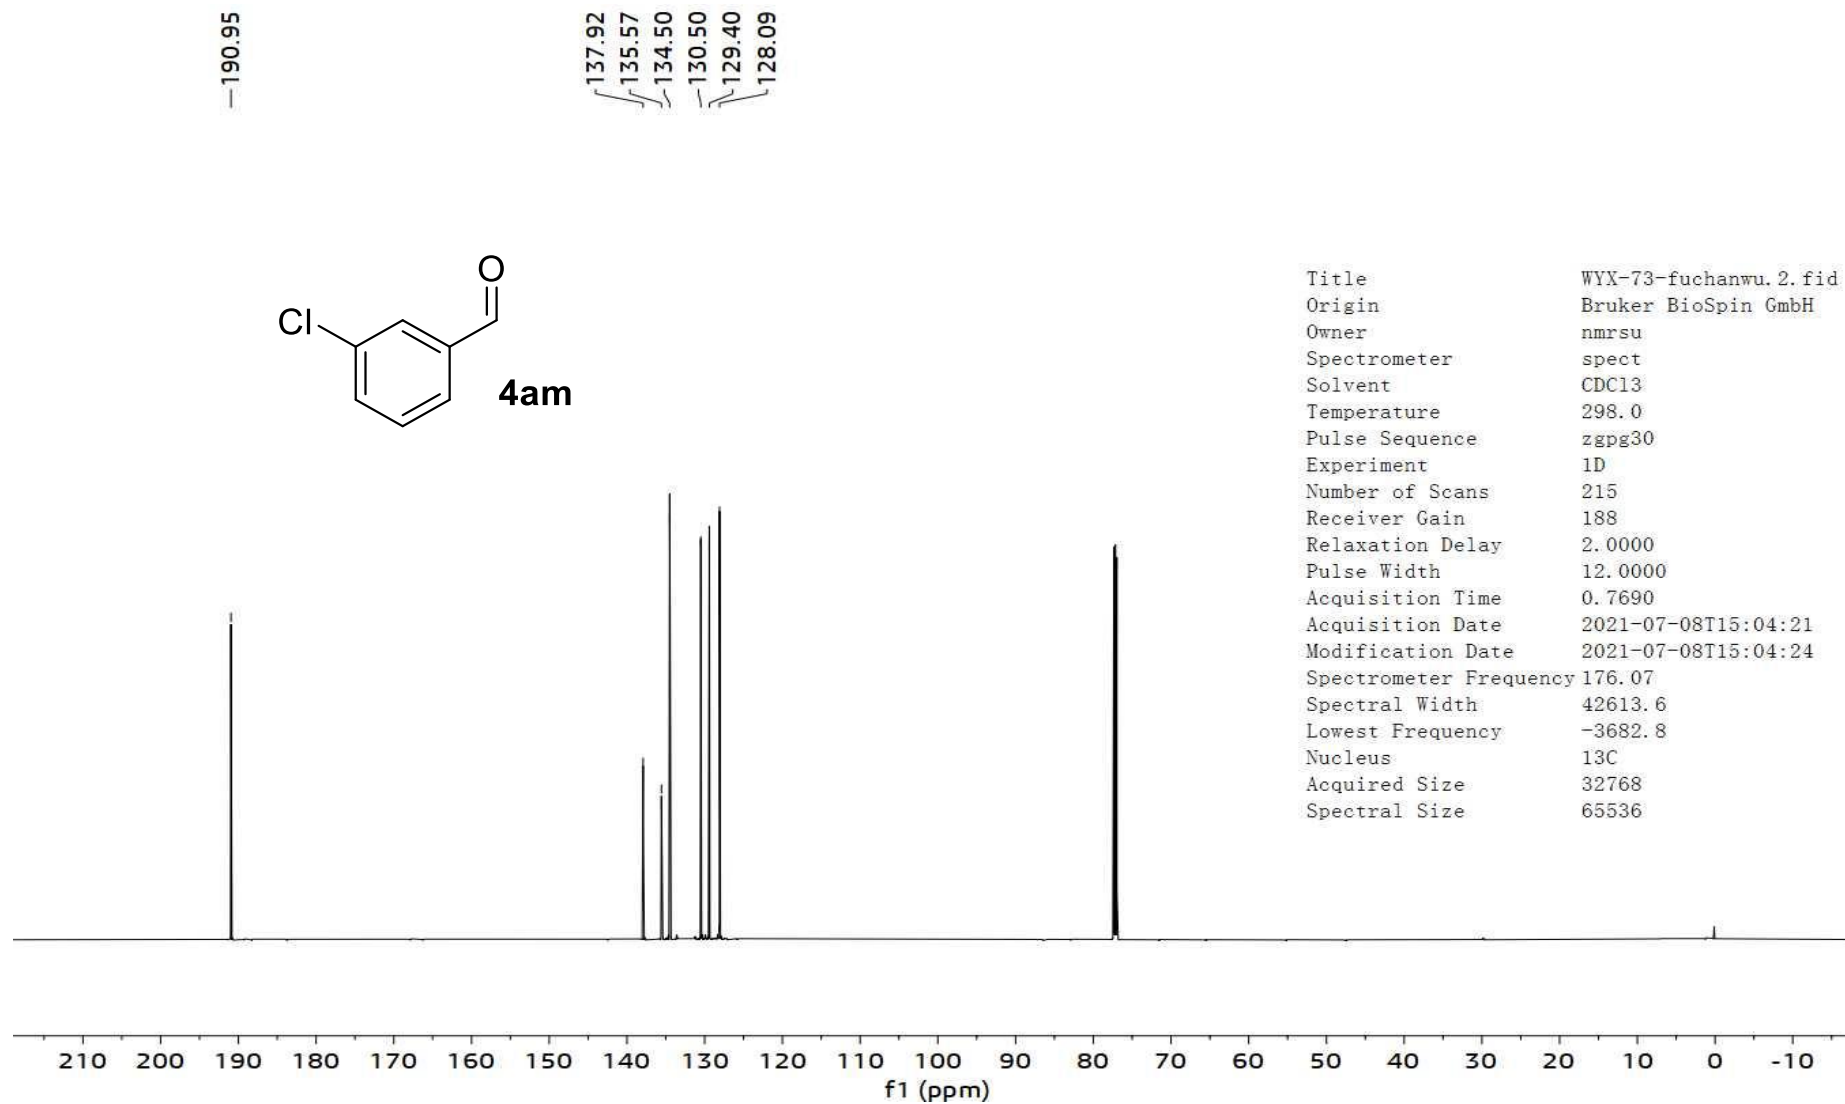

8.3773  
8.0042  
8.0016  
7.9920  
7.9894  
7.8241  
7.8113  
7.7441  
7.7318  
7.1897  
7.1860  
7.1769  
7.1733  
7.1272  
7.1235

3.9217

3.1001  
3.0898  
3.0794  
3.0690

1.2788  
1.2685  
1.2579

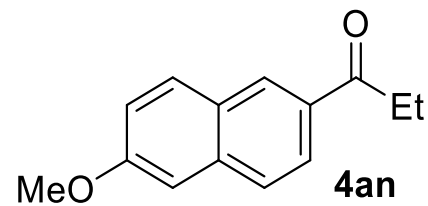

|                        |                     |
|------------------------|---------------------|
| Title                  | WYX-72-chanwu.1.fid |
| Origin                 | Bruker BioSpin GmbH |
| Owner                  | nmrsu               |
| Spectrometer           | spect               |
| Solvent                | CDC13               |
| Temperature            | 298.0               |
| Pulse Sequence         | zg30                |
| Experiment             | 1D                  |
| Number of Scans        | 6                   |
| Receiver Gain          | 1                   |
| Relaxation Delay       | 1.0000              |
| Pulse Width            | 12.0000             |
| Acquisition Time       | 2.3243              |
| Acquisition Date       | 2021-07-08T16:48:30 |
| Modification Date      | 2021-07-08T16:48:32 |
| Spectrometer Frequency | 700.15              |
| Spectral Width         | 14097.7             |
| Lowest Frequency       | -2740.6             |
| Nucleus                | <sup>1</sup> H      |
| Acquired Size          | 32768               |
| Spectral Size          | 131072              |

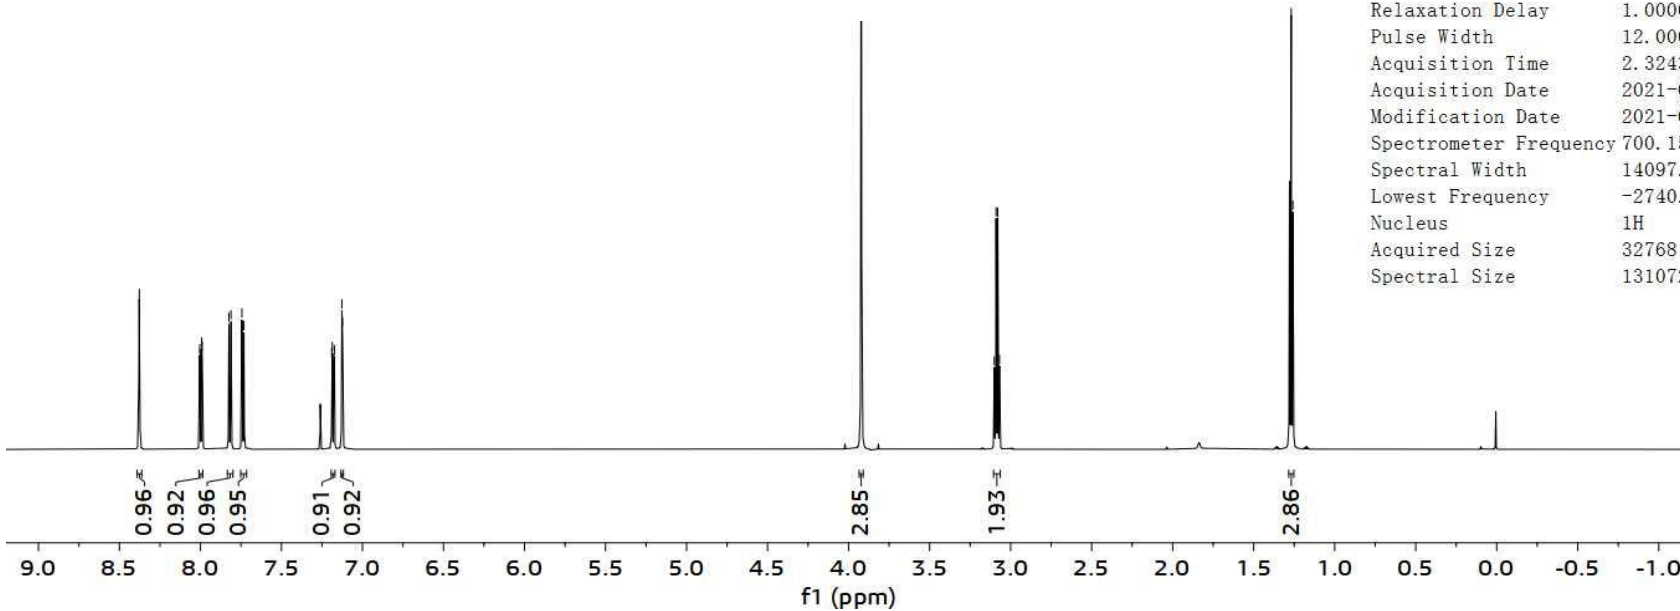

—200.61

—159.70

137.24

132.38

131.15

129.45

127.92

127.12

124.70

119.71

—105.78

—55.46

—31.73

—8.55

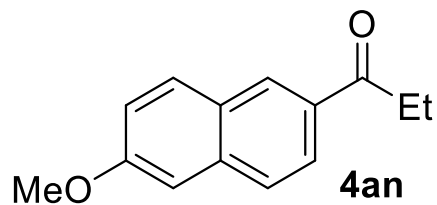

|                        |                     |
|------------------------|---------------------|
| Title                  | WYX-72-chanwu.2.fid |
| Origin                 | Bruker BioSpin GmbH |
| Owner                  | nmrsu               |
| Spectrometer           | spect               |
| Solvent                | CDC13               |
| Temperature            | 298.0               |
| Pulse Sequence         | zgpg30              |
| Experiment             | 1D                  |
| Number of Scans        | 40                  |
| Receiver Gain          | 188                 |
| Relaxation Delay       | 2.0000              |
| Pulse Width            | 12.0000             |
| Acquisition Time       | 0.7690              |
| Acquisition Date       | 2021-07-08T16:50:39 |
| Modification Date      | 2021-07-08T16:50:48 |
| Spectrometer Frequency | 176.07              |
| Spectral Width         | 42613.6             |
| Lowest Frequency       | -3690.7             |
| Nucleus                | 13C                 |
| Acquired Size          | 32768               |
| Spectral Size          | 65536               |

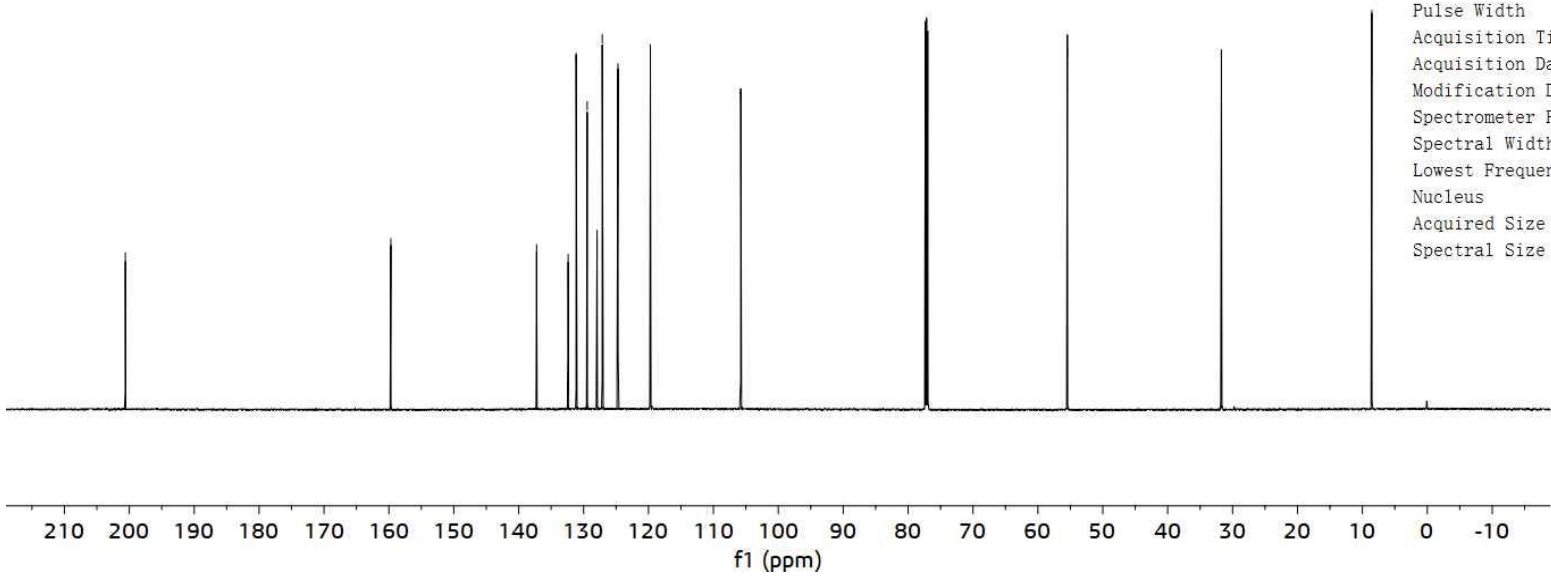

— 11.5314

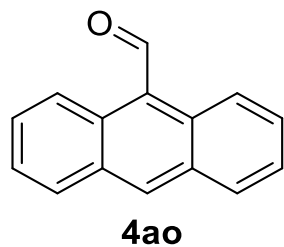

9.0011  
8.9986  
8.9787  
8.9761  
8.6965  
8.0761  
8.0551  
7.7069  
7.7034  
7.6869  
7.6842  
7.6679  
7.6644  
7.5746  
7.5720  
7.5582  
7.5553  
7.5533  
7.5507  
7.5370  
7.5344

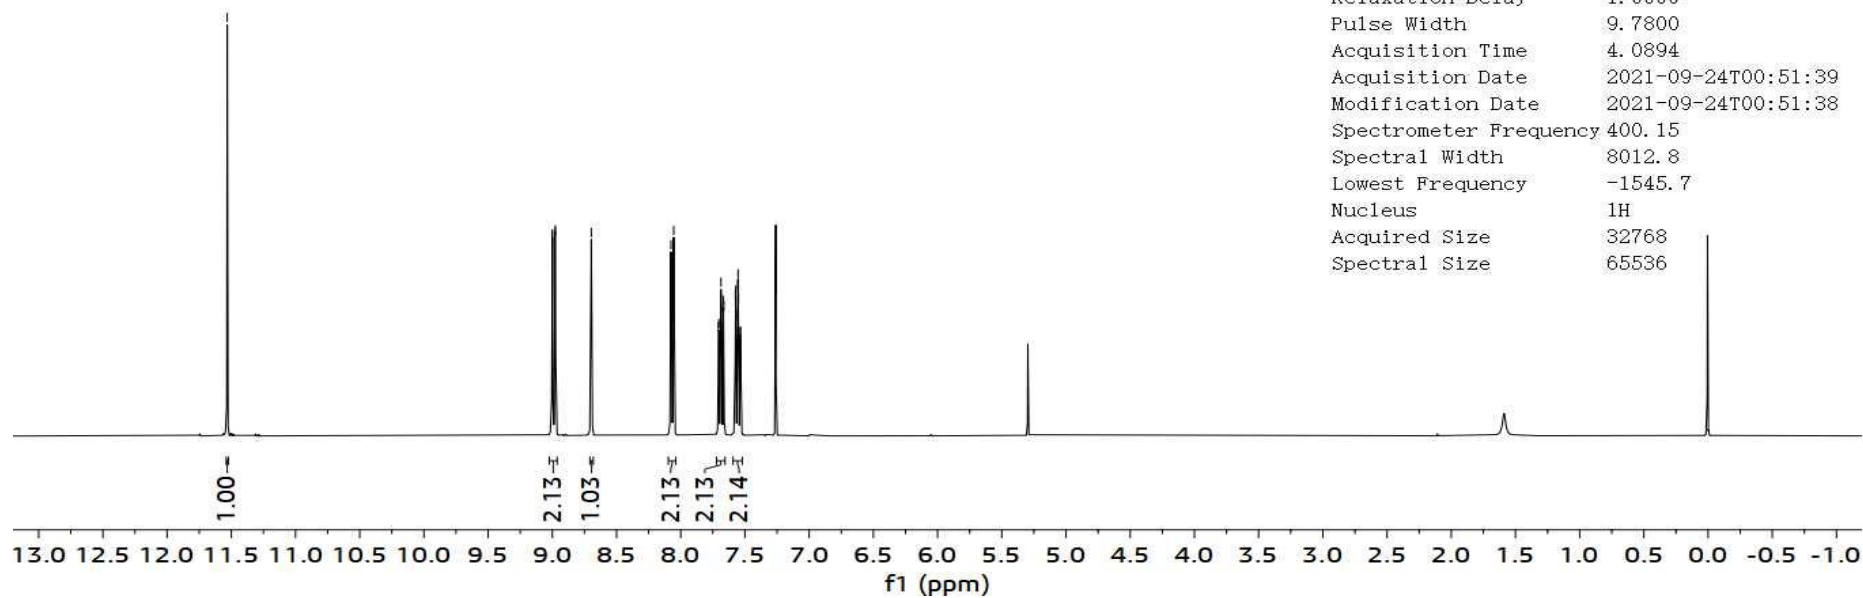

|                        |                     |
|------------------------|---------------------|
| Title                  | SN-2-20210923.1.fid |
| Origin                 | Bruker BioSpin GmbH |
| Owner                  | nmrsu               |
| Spectrometer           | spect               |
| Solvent                | CDC13               |
| Temperature            | 298.0               |
| Pulse Sequence         | zg30                |
| Experiment             | 1D                  |
| Number of Scans        | 16                  |
| Receiver Gain          | 127                 |
| Relaxation Delay       | 1.0000              |
| Pulse Width            | 9.7800              |
| Acquisition Time       | 4.0894              |
| Acquisition Date       | 2021-09-24T00:51:39 |
| Modification Date      | 2021-09-24T00:51:38 |
| Spectrometer Frequency | 400.15              |
| Spectral Width         | 8012.8              |
| Lowest Frequency       | -1545.7             |
| Nucleus                | 1H                  |
| Acquired Size          | 32768               |
| Spectral Size          | 65536               |

—193.16

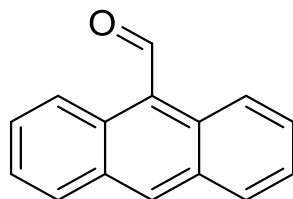

4ao

135.38  
132.29  
131.23  
129.44  
129.28  
125.84  
124.89  
123.70

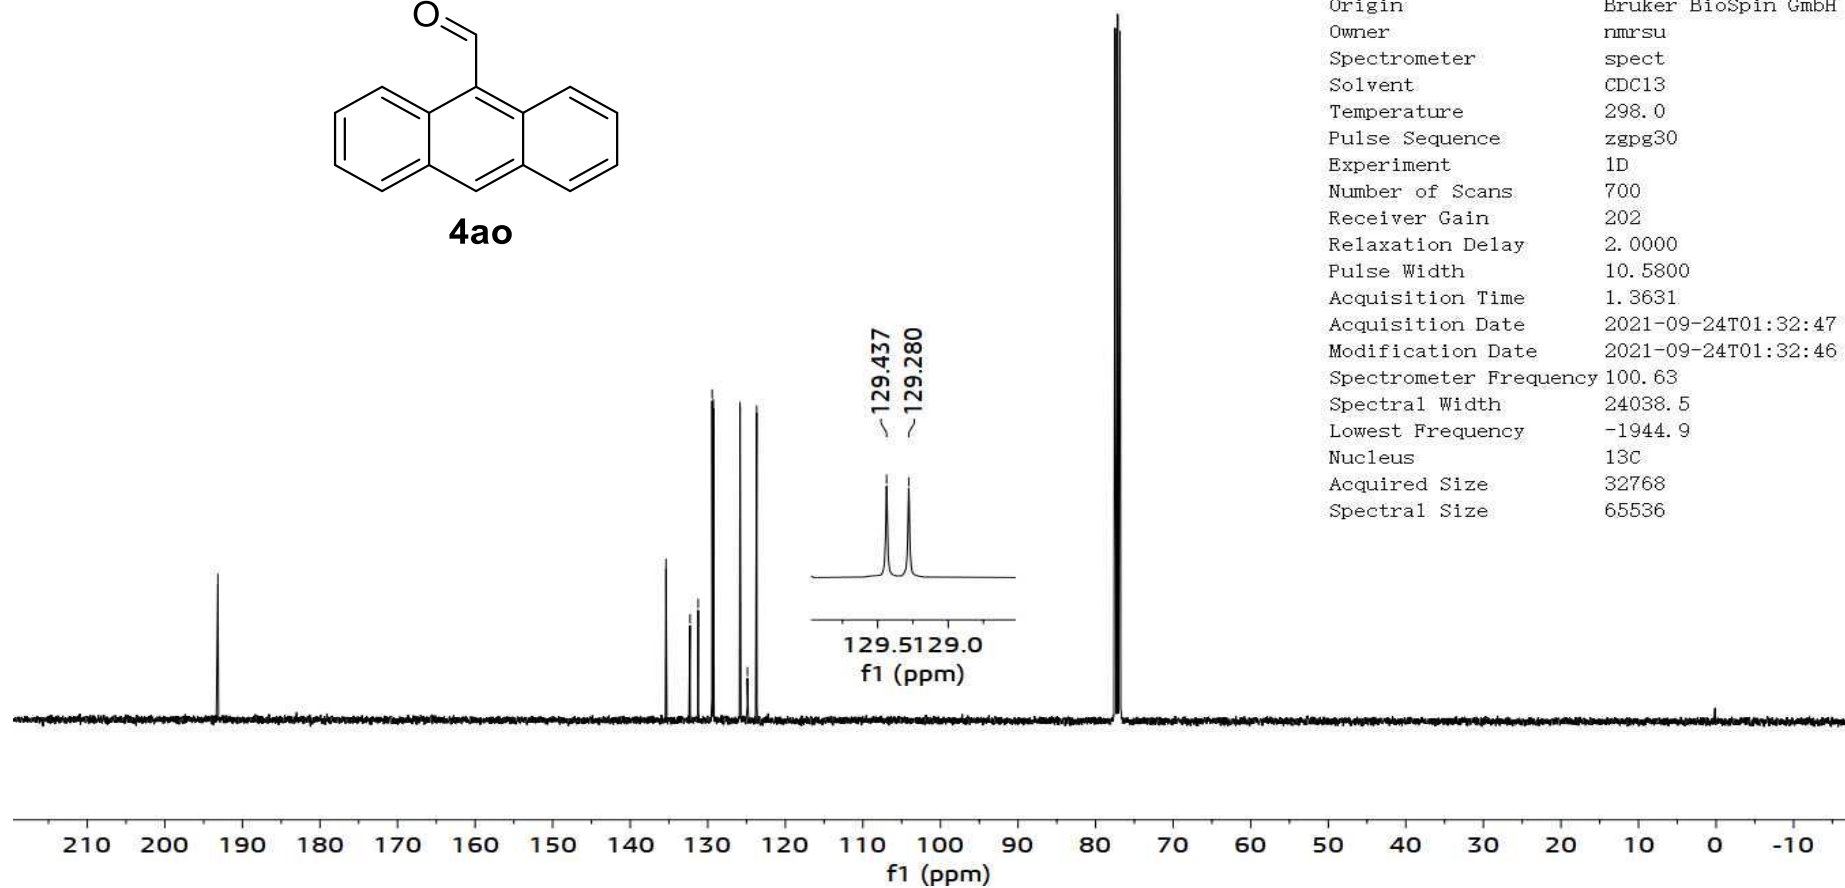

|                        |                     |
|------------------------|---------------------|
| Title                  | SN-2-20210923.2.fid |
| Origin                 | Bruker BioSpin GmbH |
| Owner                  | nmrsu               |
| Spectrometer           | spect               |
| Solvent                | CDC13               |
| Temperature            | 298.0               |
| Pulse Sequence         | zgpg30              |
| Experiment             | 1D                  |
| Number of Scans        | 700                 |
| Receiver Gain          | 202                 |
| Relaxation Delay       | 2.0000              |
| Pulse Width            | 10.5800             |
| Acquisition Time       | 1.3631              |
| Acquisition Date       | 2021-09-24T01:32:47 |
| Modification Date      | 2021-09-24T01:32:46 |
| Spectrometer Frequency | 100.63              |
| Spectral Width         | 24038.5             |
| Lowest Frequency       | -1944.9             |
| Nucleus                | 13C                 |
| Acquired Size          | 32768               |
| Spectral Size          | 65536               |

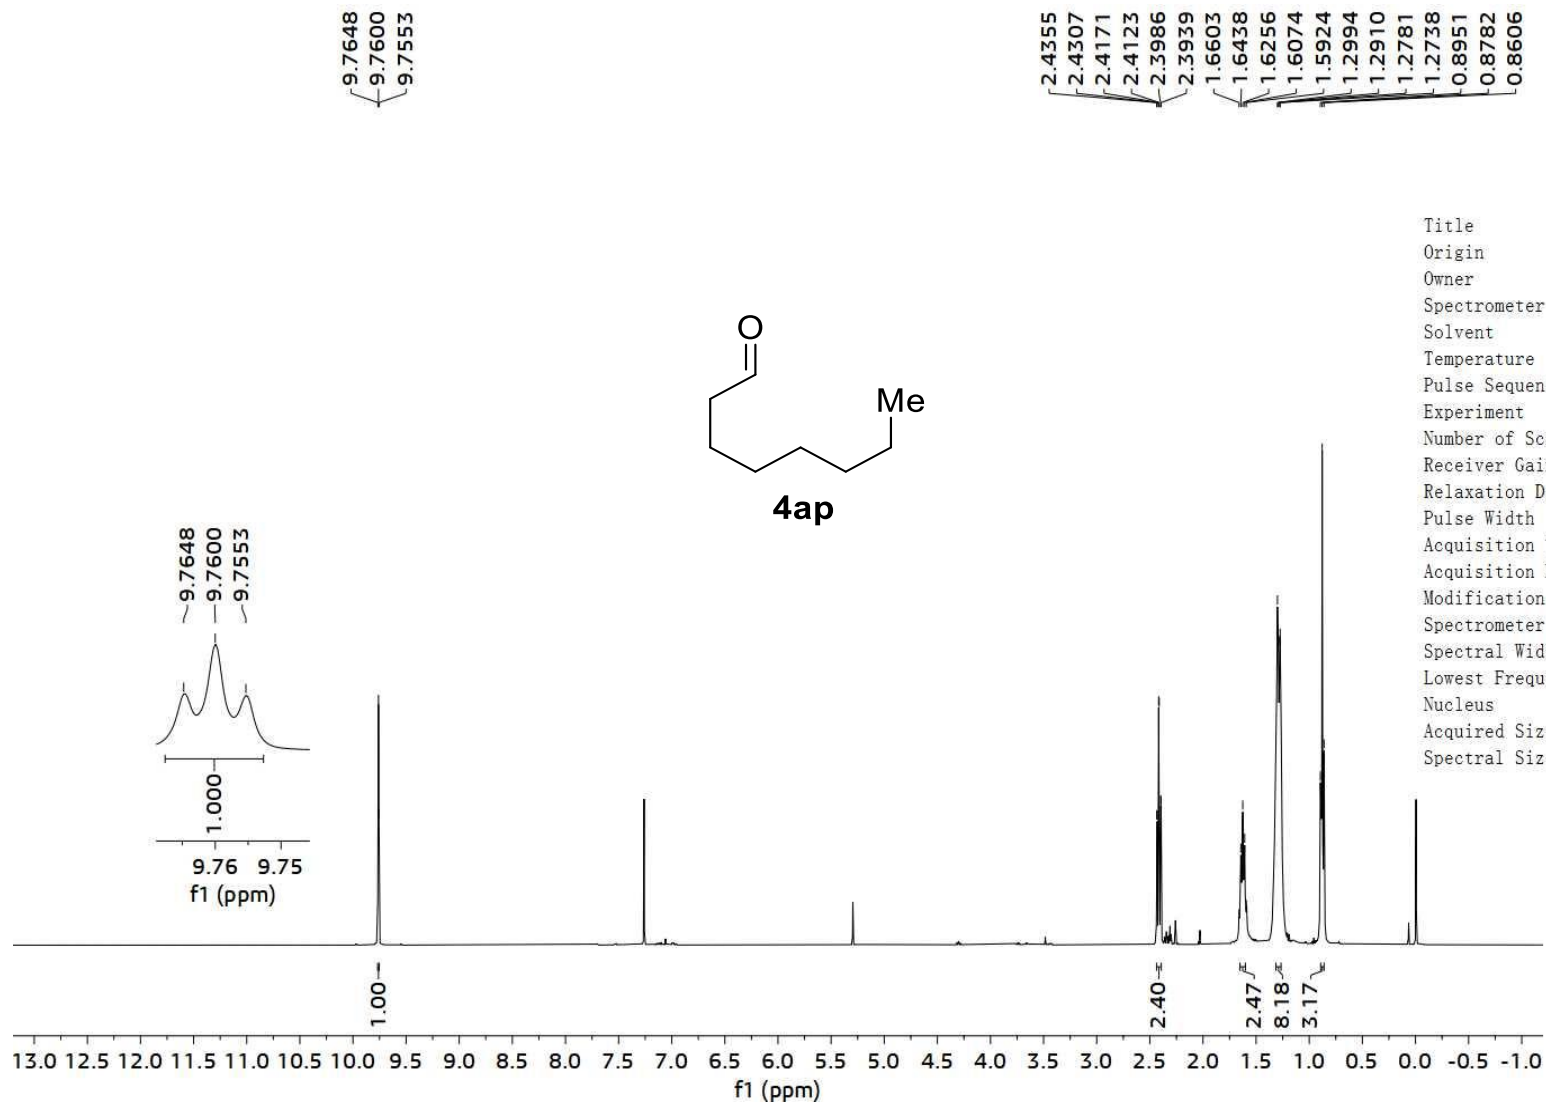

|                        |                     |
|------------------------|---------------------|
| Title                  | SN-3.3.fid          |
| Origin                 | Bruker BioSpin GmbH |
| Owner                  | nmrsu               |
| Spectrometer           | spect               |
| Solvent                | CDC13               |
| Temperature            | 298.0               |
| Pulse Sequence         | zg30                |
| Experiment             | 1D                  |
| Number of Scans        | 16                  |
| Receiver Gain          | 79                  |
| Relaxation Delay       | 1.0000              |
| Pulse Width            | 9.7800              |
| Acquisition Time       | 4.0894              |
| Acquisition Date       | 2021-09-23T08:27:55 |
| Modification Date      | 2021-09-23T08:27:54 |
| Spectrometer Frequency | 400.15              |
| Spectral Width         | 8012.8              |
| Lowest Frequency       | -1545.5             |
| Nucleus                | 1H                  |
| Acquired Size          | 32768               |
| Spectral Size          | 65536               |

—203.15

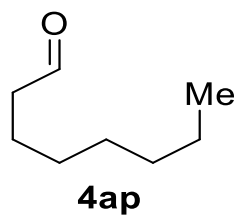

—44.07  
31.77  
29.27  
29.16  
22.73  
22.24  
14.19

|                        |                     |
|------------------------|---------------------|
| Title                  | SN-3.4.fid          |
| Origin                 | Bruker BioSpin GmbH |
| Owner                  | nmrsu               |
| Spectrometer           | spect               |
| Solvent                | CDC13               |
| Temperature            | 298.0               |
| Pulse Sequence         | zgpg30              |
| Experiment             | 1D                  |
| Number of Scans        | 500                 |
| Receiver Gain          | 202                 |
| Relaxation Delay       | 2.0000              |
| Pulse Width            | 10.5800             |
| Acquisition Time       | 1.3631              |
| Acquisition Date       | 2021-09-23T08:57:37 |
| Modification Date      | 2021-09-23T08:57:36 |
| Spectrometer Frequency | 100.63              |
| Spectral Width         | 24038.5             |
| Lowest Frequency       | -1943.1             |
| Nucleus                | 13C                 |
| Acquired Size          | 32768               |
| Spectral Size          | 65536               |

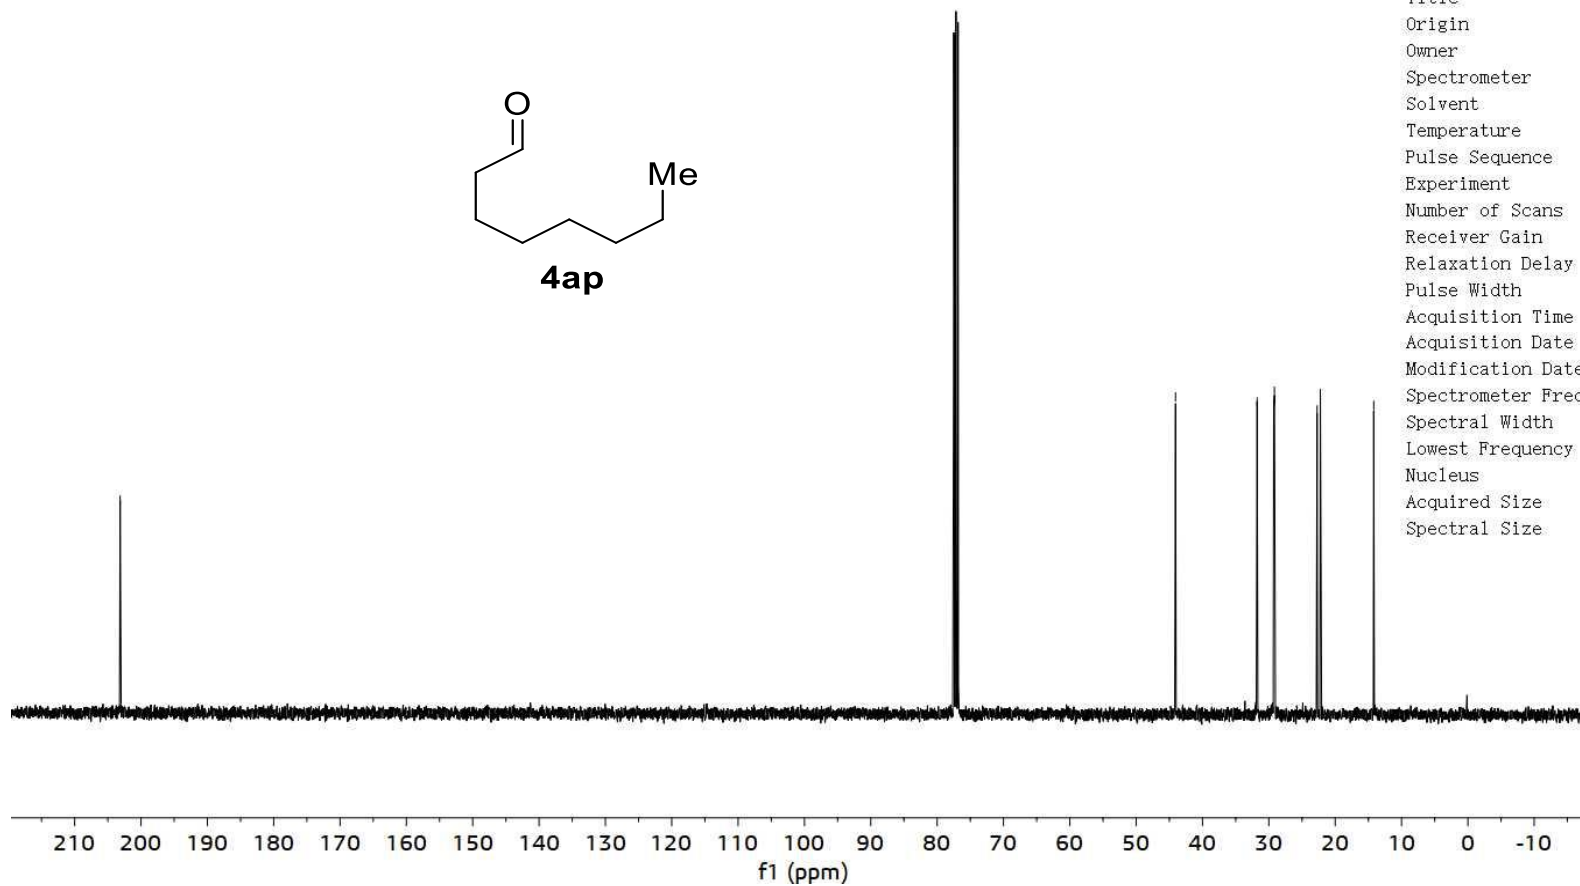

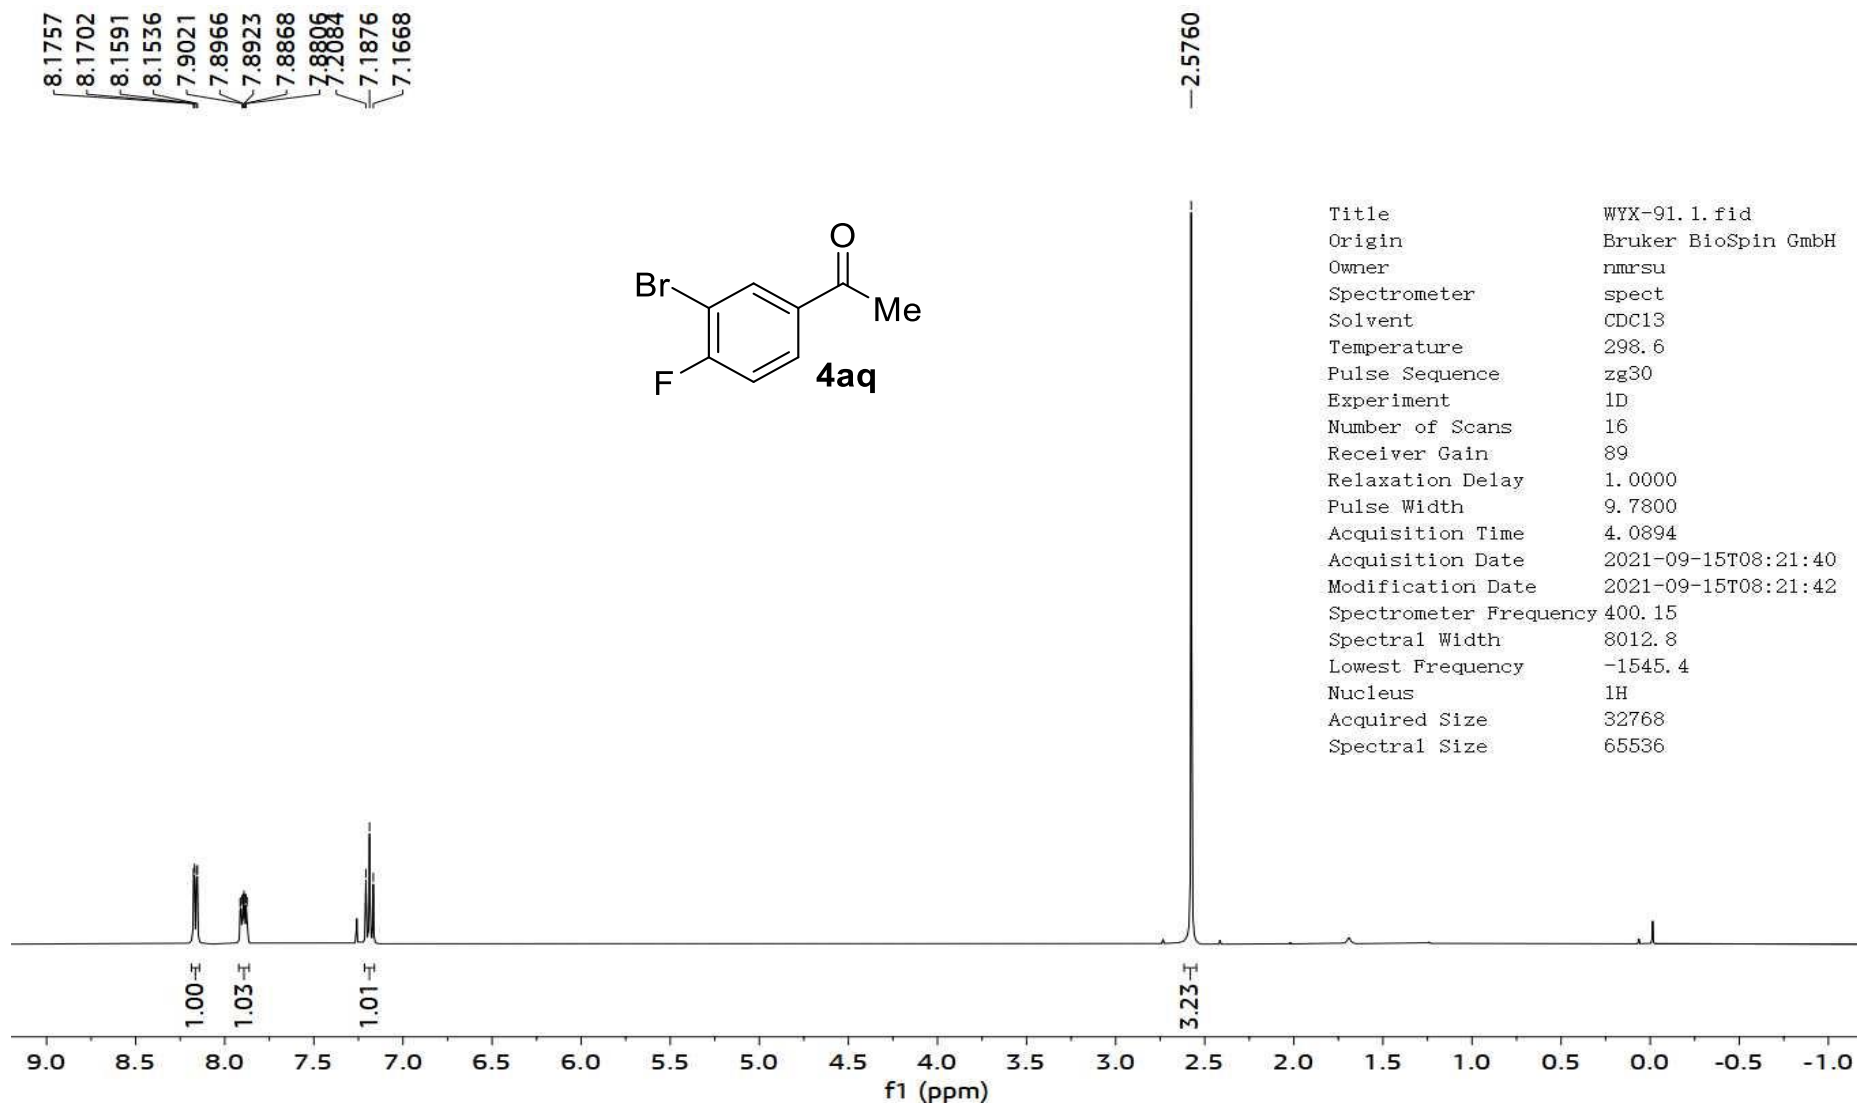



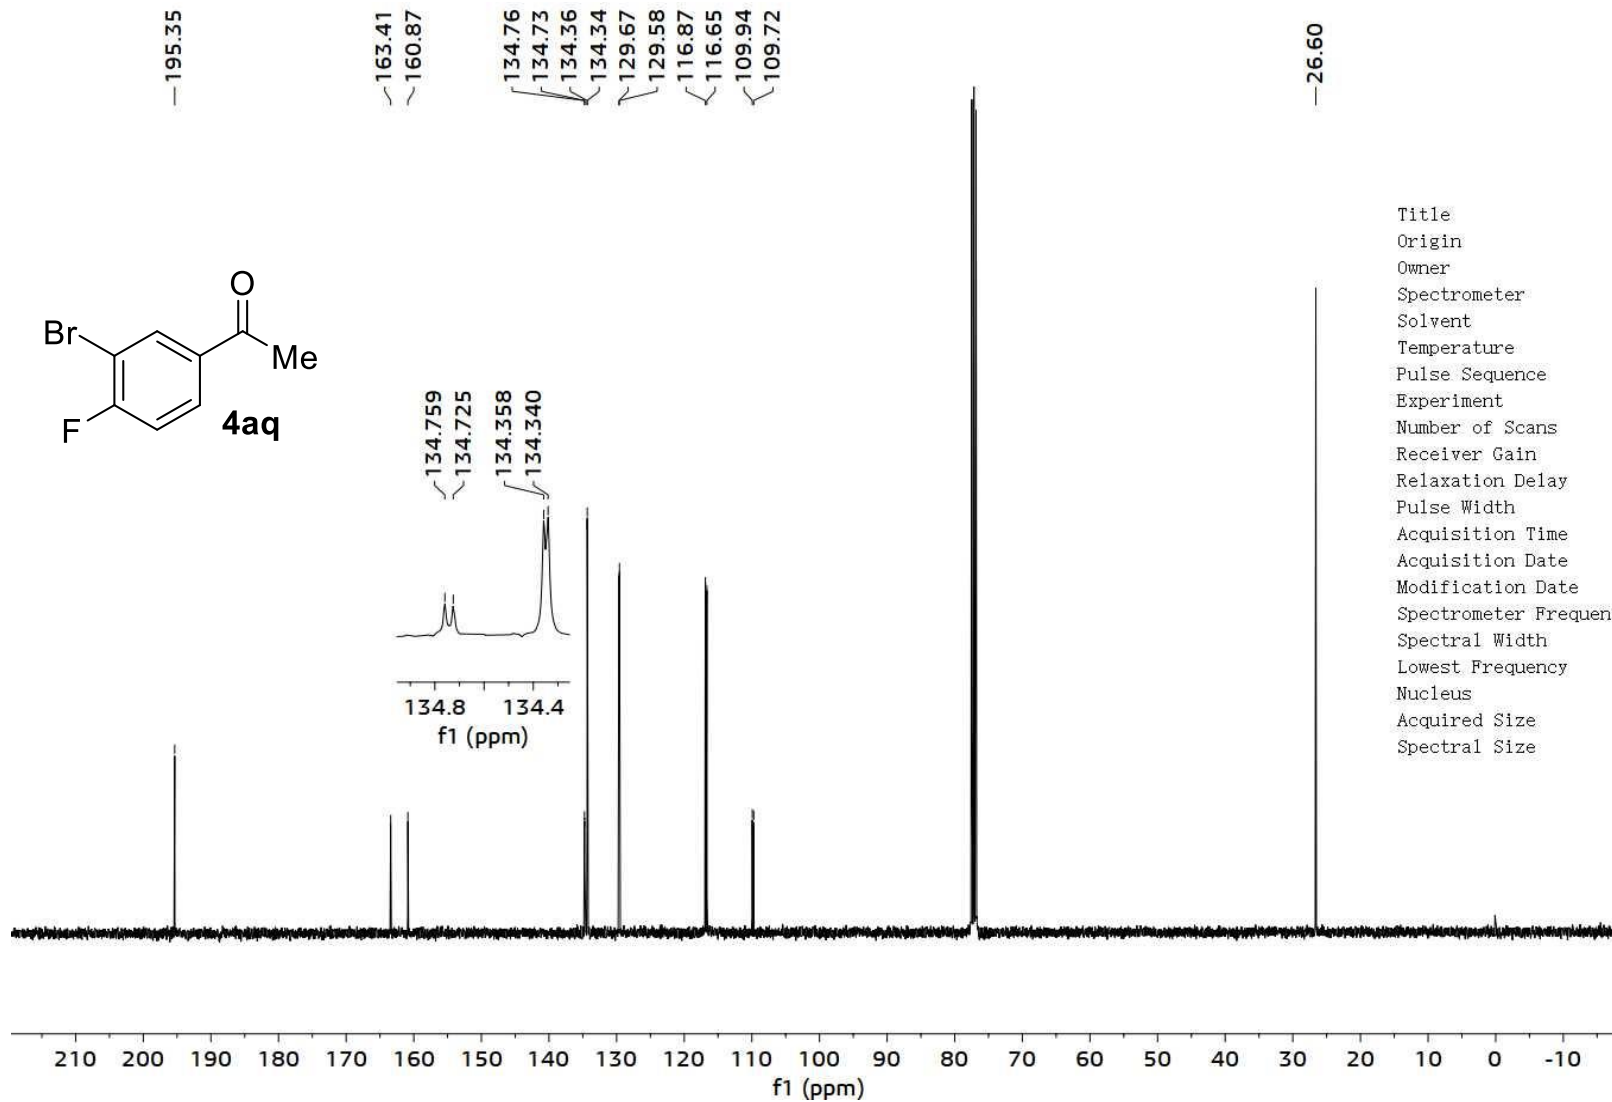

|                        |                     |
|------------------------|---------------------|
| Title                  | WYX-91.2.fid        |
| Origin                 | Bruker BioSpin GmbH |
| Owner                  | nmrsu               |
| Spectrometer           | spect               |
| Solvent                | CDC13               |
| Temperature            | 299.2               |
| Pulse Sequence         | zgpg30              |
| Experiment             | 1D                  |
| Number of Scans        | 441                 |
| Receiver Gain          | 202                 |
| Relaxation Delay       | 2.0000              |
| Pulse Width            | 10.5800             |
| Acquisition Time       | 1.3631              |
| Acquisition Date       | 2021-09-15T08:47:57 |
| Modification Date      | 2021-09-15T08:48:00 |
| Spectrometer Frequency | 100.63              |
| Spectral Width         | 24038.5             |
| Lowest Frequency       | -1946.4             |
| Nucleus                | 13C                 |
| Acquired Size          | 32768               |
| Spectral Size          | 65536               |

7.7543  
7.7349  
7.6609  
7.6567  
7.6539  
7.6504  
7.6370  
7.6328  
7.6300  
7.6267  
7.4676  
7.4535  
7.4474  
7.4335  
7.4273  
7.4137  
7.2782  
7.2718  
7.2632  
7.2583  
7.2512  
7.2369  
7.2306

3.0158  
2.9978  
2.9792  
2.9617

1.2498  
1.2313  
1.2132

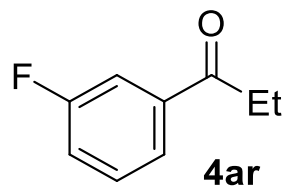

|                        |                     |
|------------------------|---------------------|
| Title                  | WYX-93.3.fid        |
| Origin                 | Bruker BioSpin GmbH |
| Owner                  | nmrsu               |
| Spectrometer           | spect               |
| Solvent                | CDC13               |
| Temperature            | 298.5               |
| Pulse Sequence         | zg30                |
| Experiment             | 1D                  |
| Number of Scans        | 16                  |
| Receiver Gain          | 112                 |
| Relaxation Delay       | 1.0000              |
| Pulse Width            | 9.7800              |
| Acquisition Time       | 4.0894              |
| Acquisition Date       | 2021-09-15T08:59:12 |
| Modification Date      | 2021-09-15T08:59:14 |
| Spectrometer Frequency | 400.15              |
| Spectral Width         | 8012.8              |
| Lowest Frequency       | -1544.2             |
| Nucleus                | <sup>1</sup> H      |
| Acquired Size          | 32768               |
| Spectral Size          | 65536               |

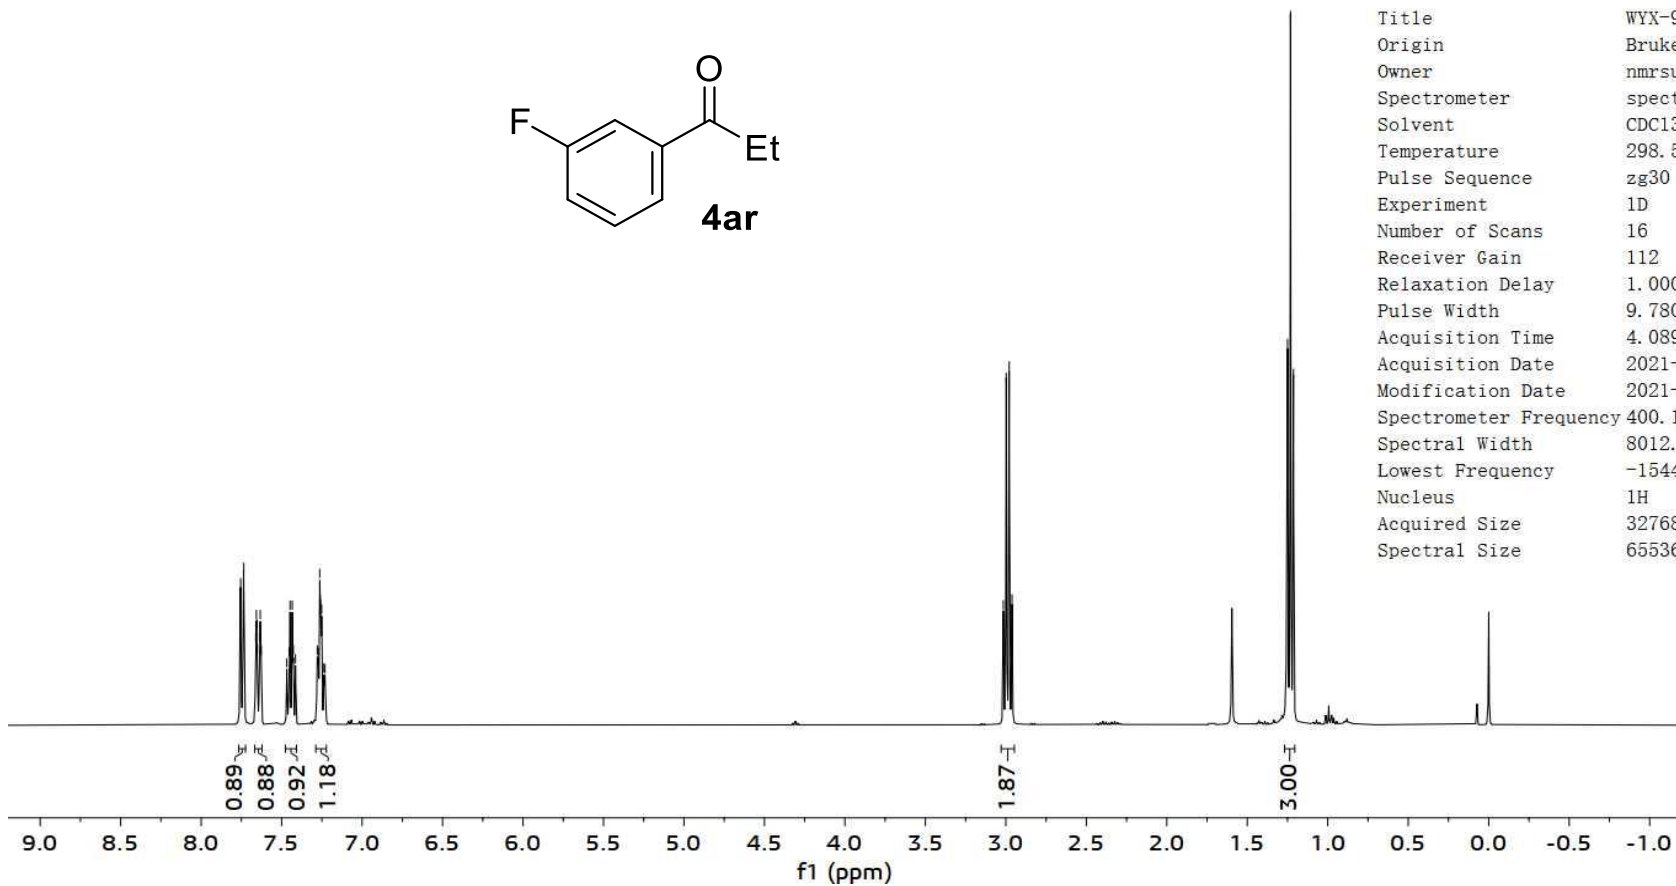

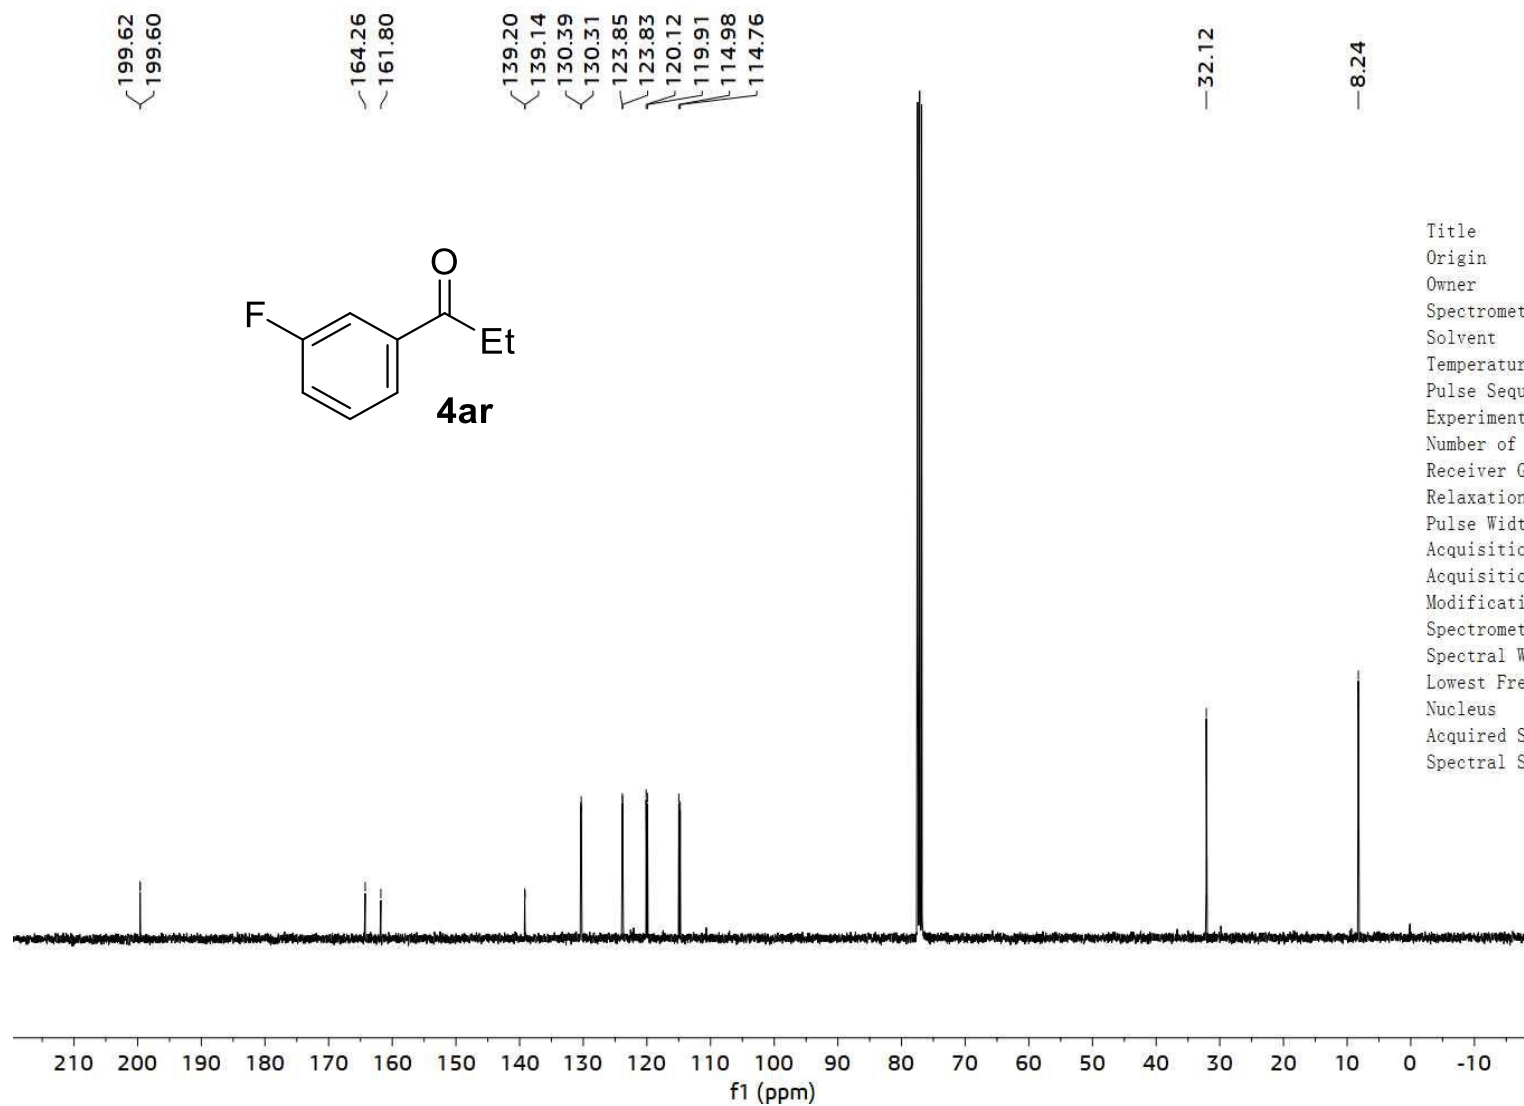

|                        |                     |
|------------------------|---------------------|
| Title                  | WYX-93.4.fid        |
| Origin                 | Bruker BioSpin GmbH |
| Owner                  | nmsu                |
| Spectrometer           | spect               |
| Solvent                | CDC13               |
| Temperature            | 299.2               |
| Pulse Sequence         | zgpg30              |
| Experiment             | 1D                  |
| Number of Scans        | 500                 |
| Receiver Gain          | 202                 |
| Relaxation Delay       | 2.0000              |
| Pulse Width            | 10.5800             |
| Acquisition Time       | 1.3631              |
| Acquisition Date       | 2021-09-15T09:28:50 |
| Modification Date      | 2021-09-15T09:28:52 |
| Spectrometer Frequency | 100.63              |
| Spectral Width         | 24038.5             |
| Lowest Frequency       | -1944.2             |
| Nucleus                | 13C                 |
| Acquired Size          | 32768               |
| Spectral Size          | 65536               |

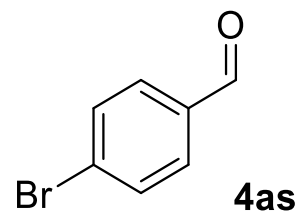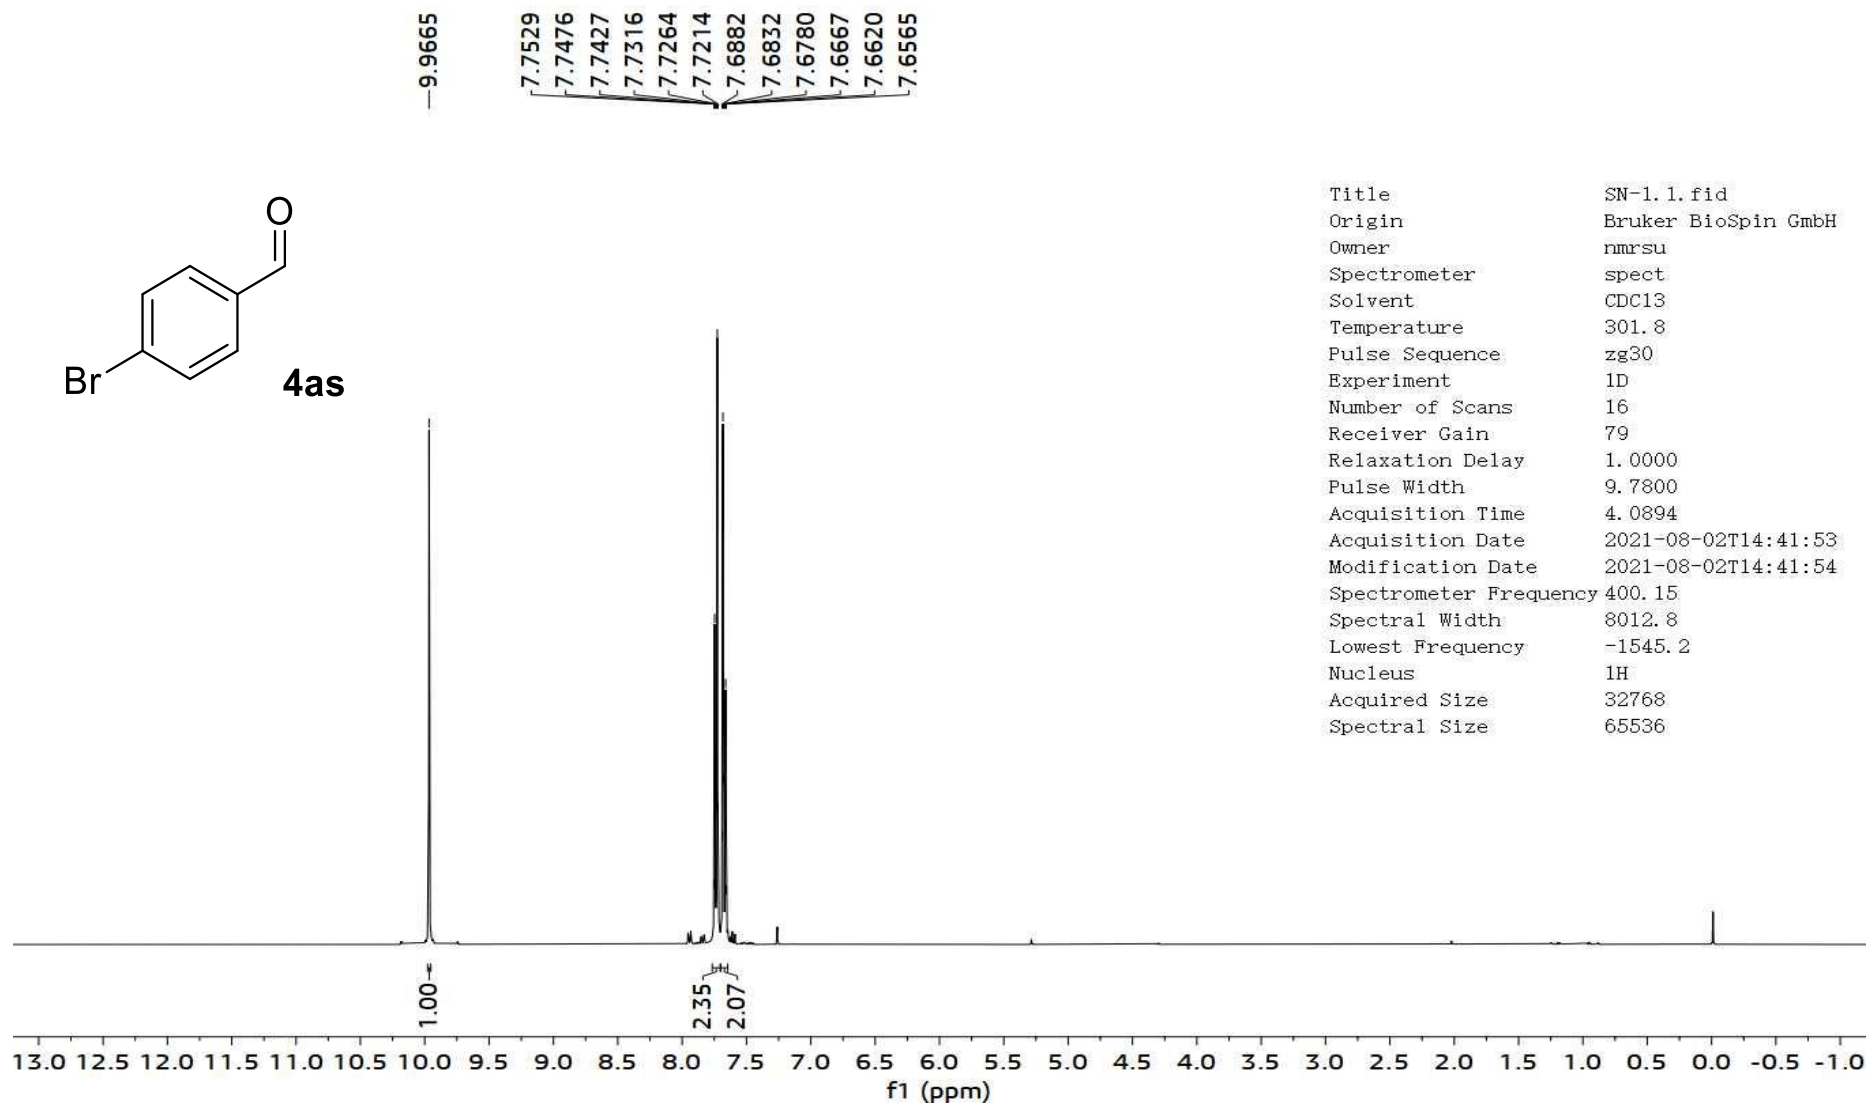

-191.15

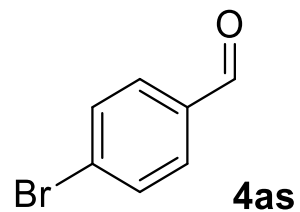

135.23  
132.57  
131.09  
129.89

|                        |                     |
|------------------------|---------------------|
| Title                  | SN-1.2.fid          |
| Origin                 | Bruker BioSpin GmbH |
| Owner                  | nmrsu               |
| Spectrometer           | spect               |
| Solvent                | CDC13               |
| Temperature            | 302.4               |
| Pulse Sequence         | zpgp30              |
| Experiment             | 1D                  |
| Number of Scans        | 507                 |
| Receiver Gain          | 202                 |
| Relaxation Delay       | 2.0000              |
| Pulse Width            | 10.5800             |
| Acquisition Time       | 1.3631              |
| Acquisition Date       | 2021-08-02T15:11:58 |
| Modification Date      | 2021-08-02T15:12:00 |
| Spectrometer Frequency | 100.63              |
| Spectral Width         | 24038.5             |
| Lowest Frequency       | -1945.2             |
| Nucleus                | 13C                 |
| Acquired Size          | 32768               |
| Spectral Size          | 65536               |

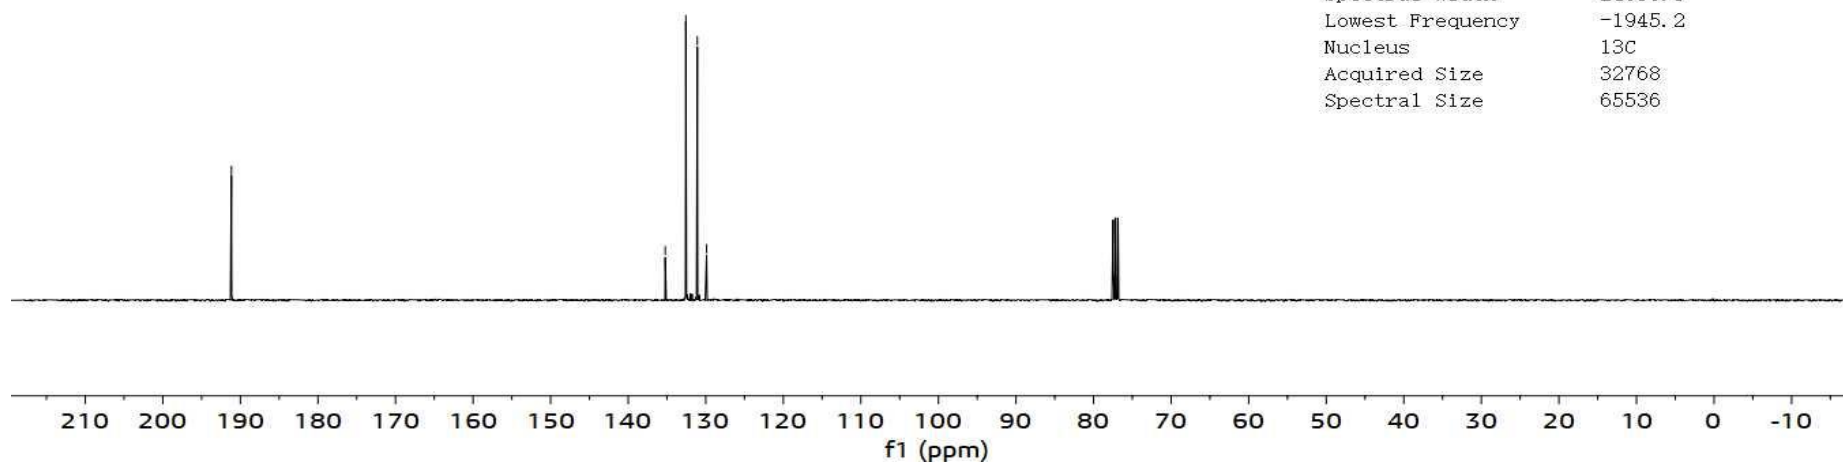

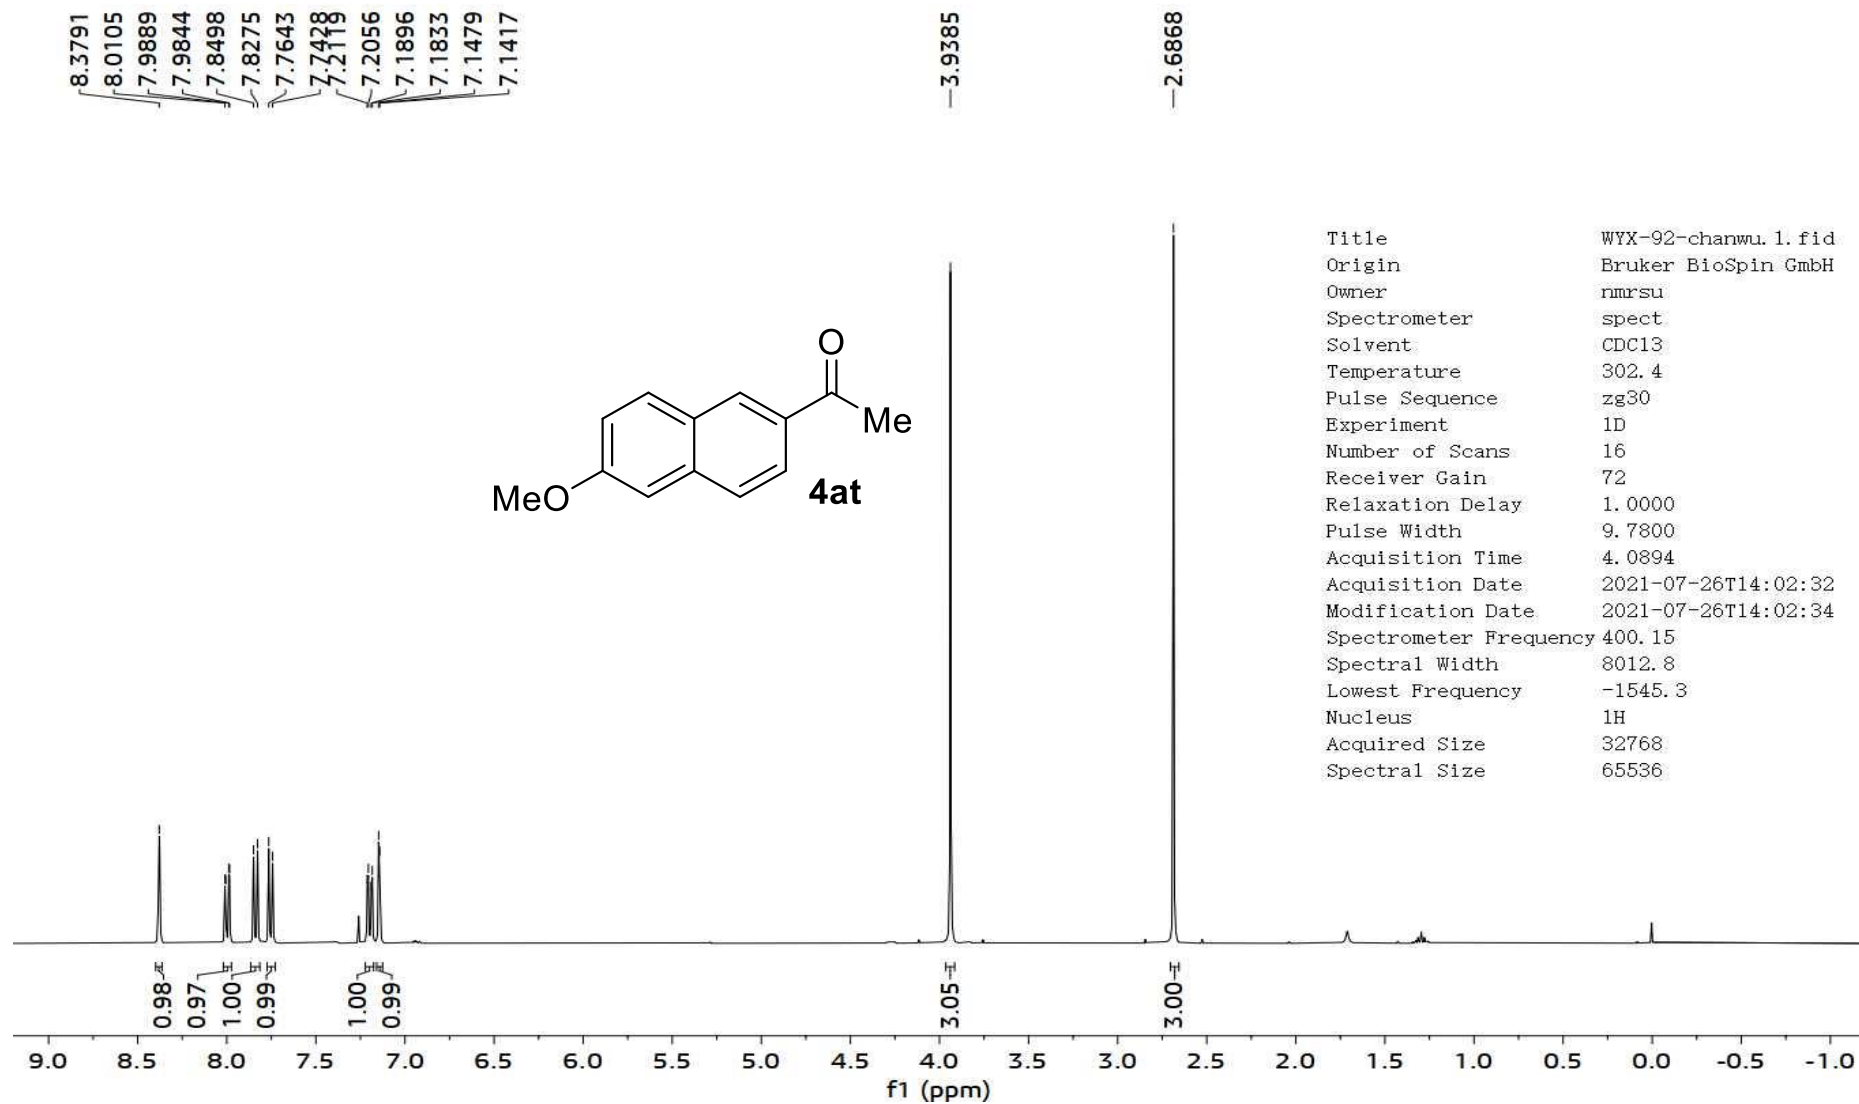

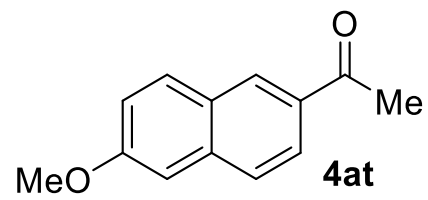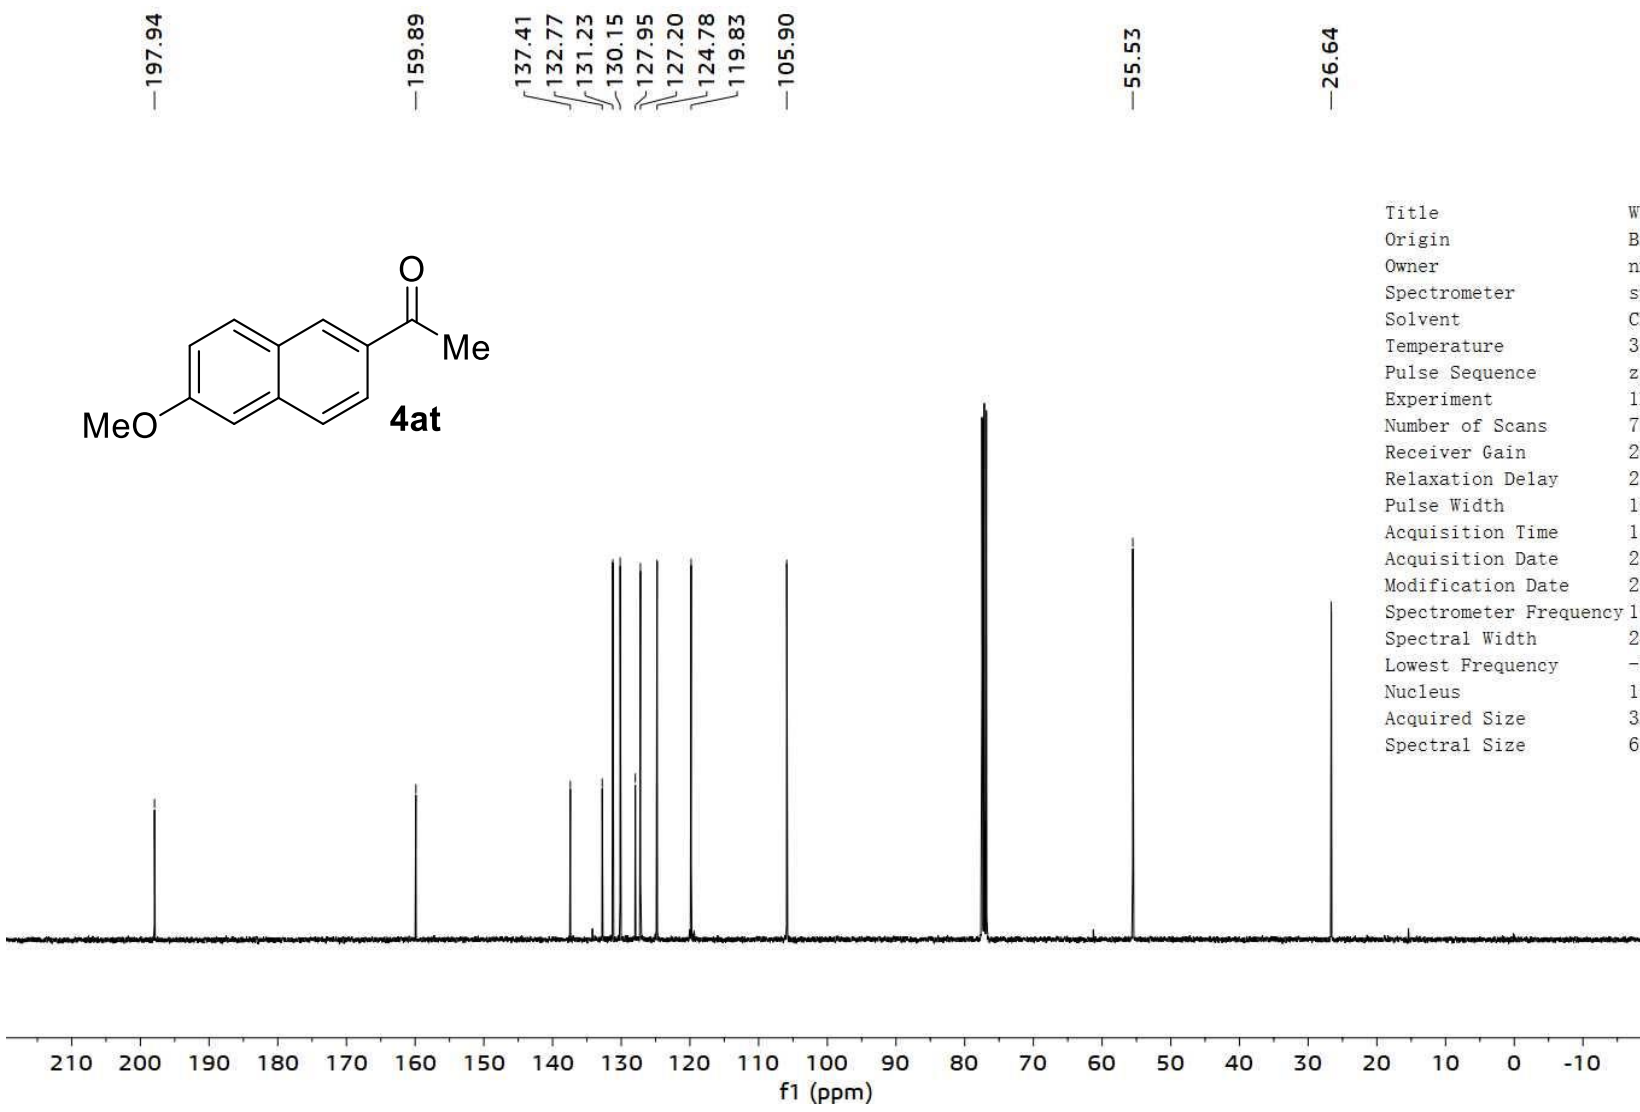

|                        |                       |
|------------------------|-----------------------|
| Title                  | WYX-92-chanwu. 2. fid |
| Origin                 | Bruker BioSpin GmbH   |
| Owner                  | nmrsu                 |
| Spectrometer           | spect                 |
| Solvent                | CDC13                 |
| Temperature            | 303.0                 |
| Pulse Sequence         | zgpg30                |
| Experiment             | 1D                    |
| Number of Scans        | 750                   |
| Receiver Gain          | 202                   |
| Relaxation Delay       | 2.0000                |
| Pulse Width            | 10.5800               |
| Acquisition Time       | 1.3631                |
| Acquisition Date       | 2021-07-26T14:46:27   |
| Modification Date      | 2021-07-26T14:46:28   |
| Spectrometer Frequency | 100.63                |
| Spectral Width         | 24038.5               |
| Lowest Frequency       | -1946.4               |
| Nucleus                | 13C                   |
| Acquired Size          | 32768                 |
| Spectral Size          | 65536                 |

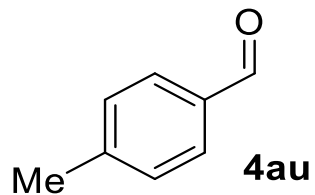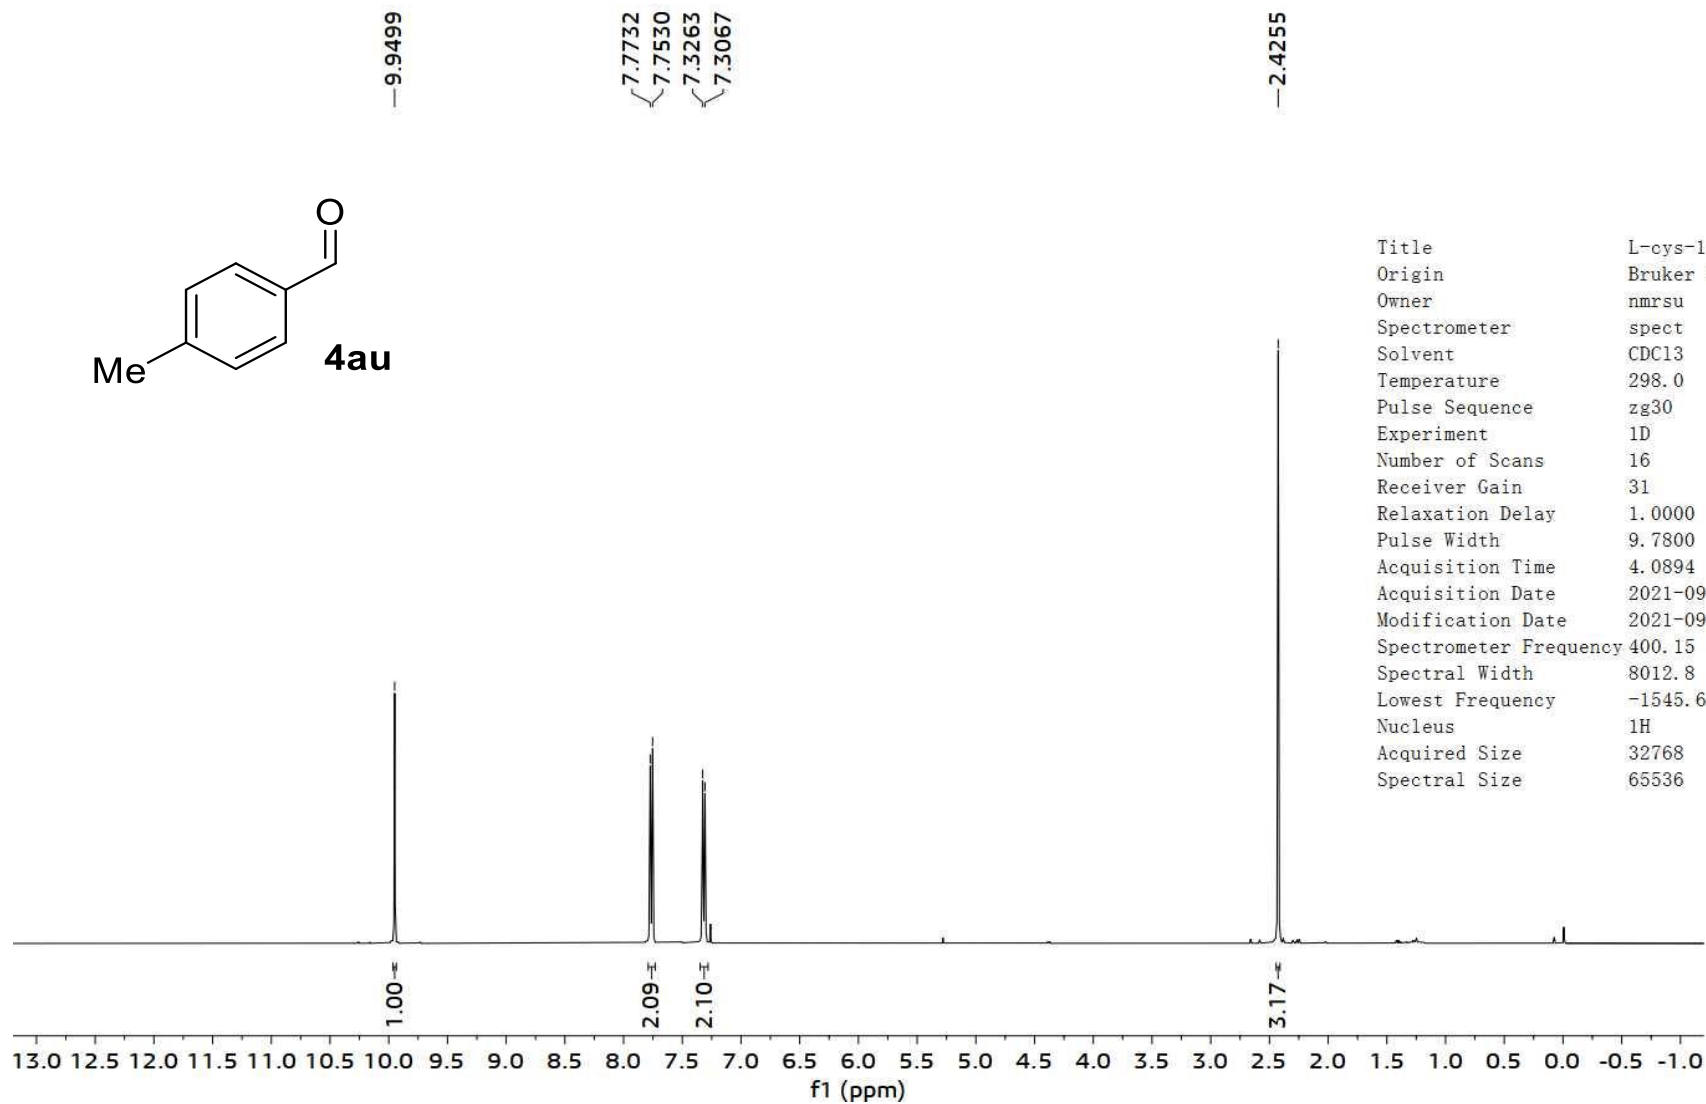

|                        |                     |
|------------------------|---------------------|
| Title                  | L-cys-1.1.fid       |
| Origin                 | Bruker BioSpin GmbH |
| Owner                  | nmrsu               |
| Spectrometer           | spect               |
| Solvent                | CDCl3               |
| Temperature            | 298.0               |
| Pulse Sequence         | zg30                |
| Experiment             | 1D                  |
| Number of Scans        | 16                  |
| Receiver Gain          | 31                  |
| Relaxation Delay       | 1.0000              |
| Pulse Width            | 9.7800              |
| Acquisition Time       | 4.0894              |
| Acquisition Date       | 2021-09-23T09:02:44 |
| Modification Date      | 2021-09-23T09:02:44 |
| Spectrometer Frequency | 400.15              |
| Spectral Width         | 8012.8              |
| Lowest Frequency       | -1545.6             |
| Nucleus                | <sup>1</sup> H      |
| Acquired Size          | 32768               |
| Spectral Size          | 65536               |



— 192.07

— 145.63

✓ 134.30

✓ 129.93

✓ 129.80

— 21.96

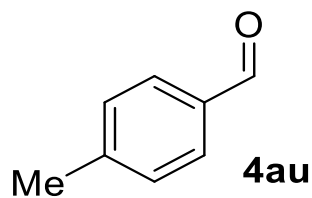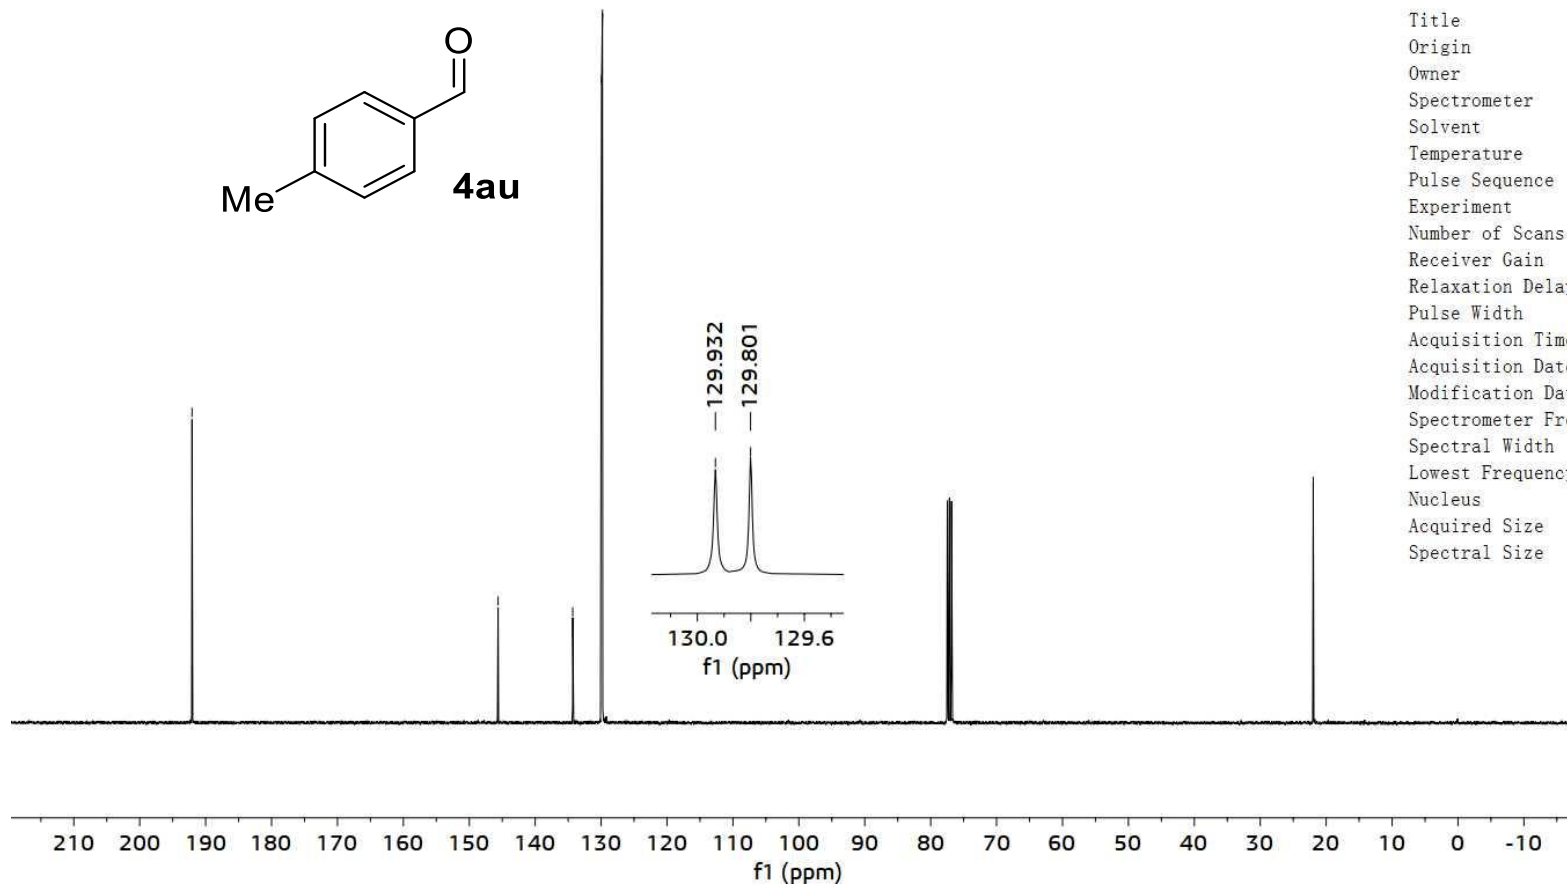

|                        |                     |
|------------------------|---------------------|
| Title                  | L-cys-1.2.fid       |
| Origin                 | Bruker BioSpin GmbH |
| Owner                  | nmrsu               |
| Spectrometer           | spect               |
| Solvent                | CDC13               |
| Temperature            | 298.0               |
| Pulse Sequence         | zgpg30              |
| Experiment             | 1D                  |
| Number of Scans        | 500                 |
| Receiver Gain          | 202                 |
| Relaxation Delay       | 2.0000              |
| Pulse Width            | 10.5800             |
| Acquisition Time       | 1.3631              |
| Acquisition Date       | 2021-09-23T09:32:22 |
| Modification Date      | 2021-09-23T09:32:22 |
| Spectrometer Frequency | 100.63              |
| Spectral Width         | 24038.5             |
| Lowest Frequency       | -1949.7             |
| Nucleus                | 13C                 |
| Acquired Size          | 32768               |
| Spectral Size          | 65536               |

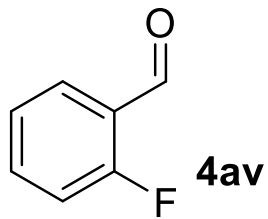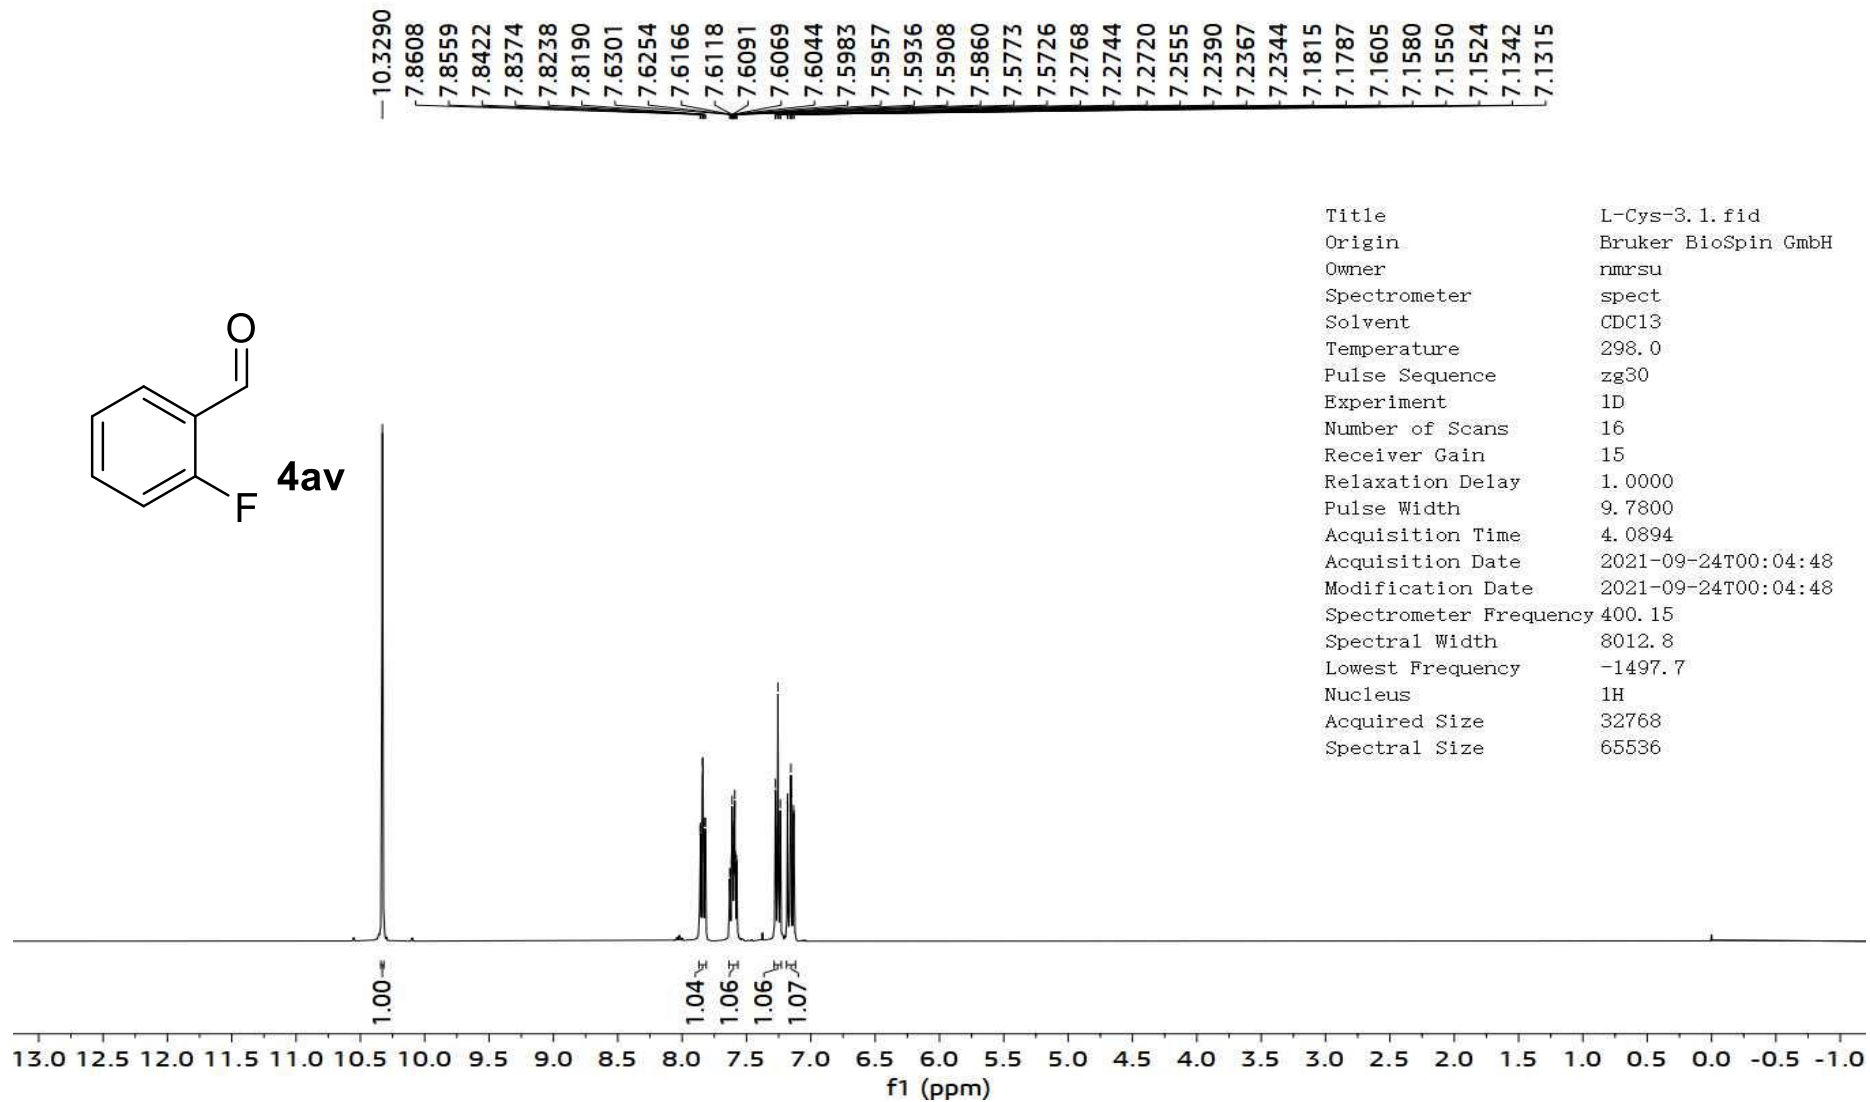

|                        |                     |
|------------------------|---------------------|
| Title                  | L-Cys-3.1.fid       |
| Origin                 | Bruker BioSpin GmbH |
| Owner                  | nmrsu               |
| Spectrometer           | spect               |
| Solvent                | CDCl3               |
| Temperature            | 298.0               |
| Pulse Sequence         | zg30                |
| Experiment             | 1D                  |
| Number of Scans        | 16                  |
| Receiver Gain          | 15                  |
| Relaxation Delay       | 1.0000              |
| Pulse Width            | 9.7800              |
| Acquisition Time       | 4.0894              |
| Acquisition Date       | 2021-09-24T00:04:48 |
| Modification Date      | 2021-09-24T00:04:48 |
| Spectrometer Frequency | 400.15              |
| Spectral Width         | 8012.8              |
| Lowest Frequency       | -1497.7             |
| Nucleus                | 1H                  |
| Acquired Size          | 32768               |
| Spectral Size          | 65536               |

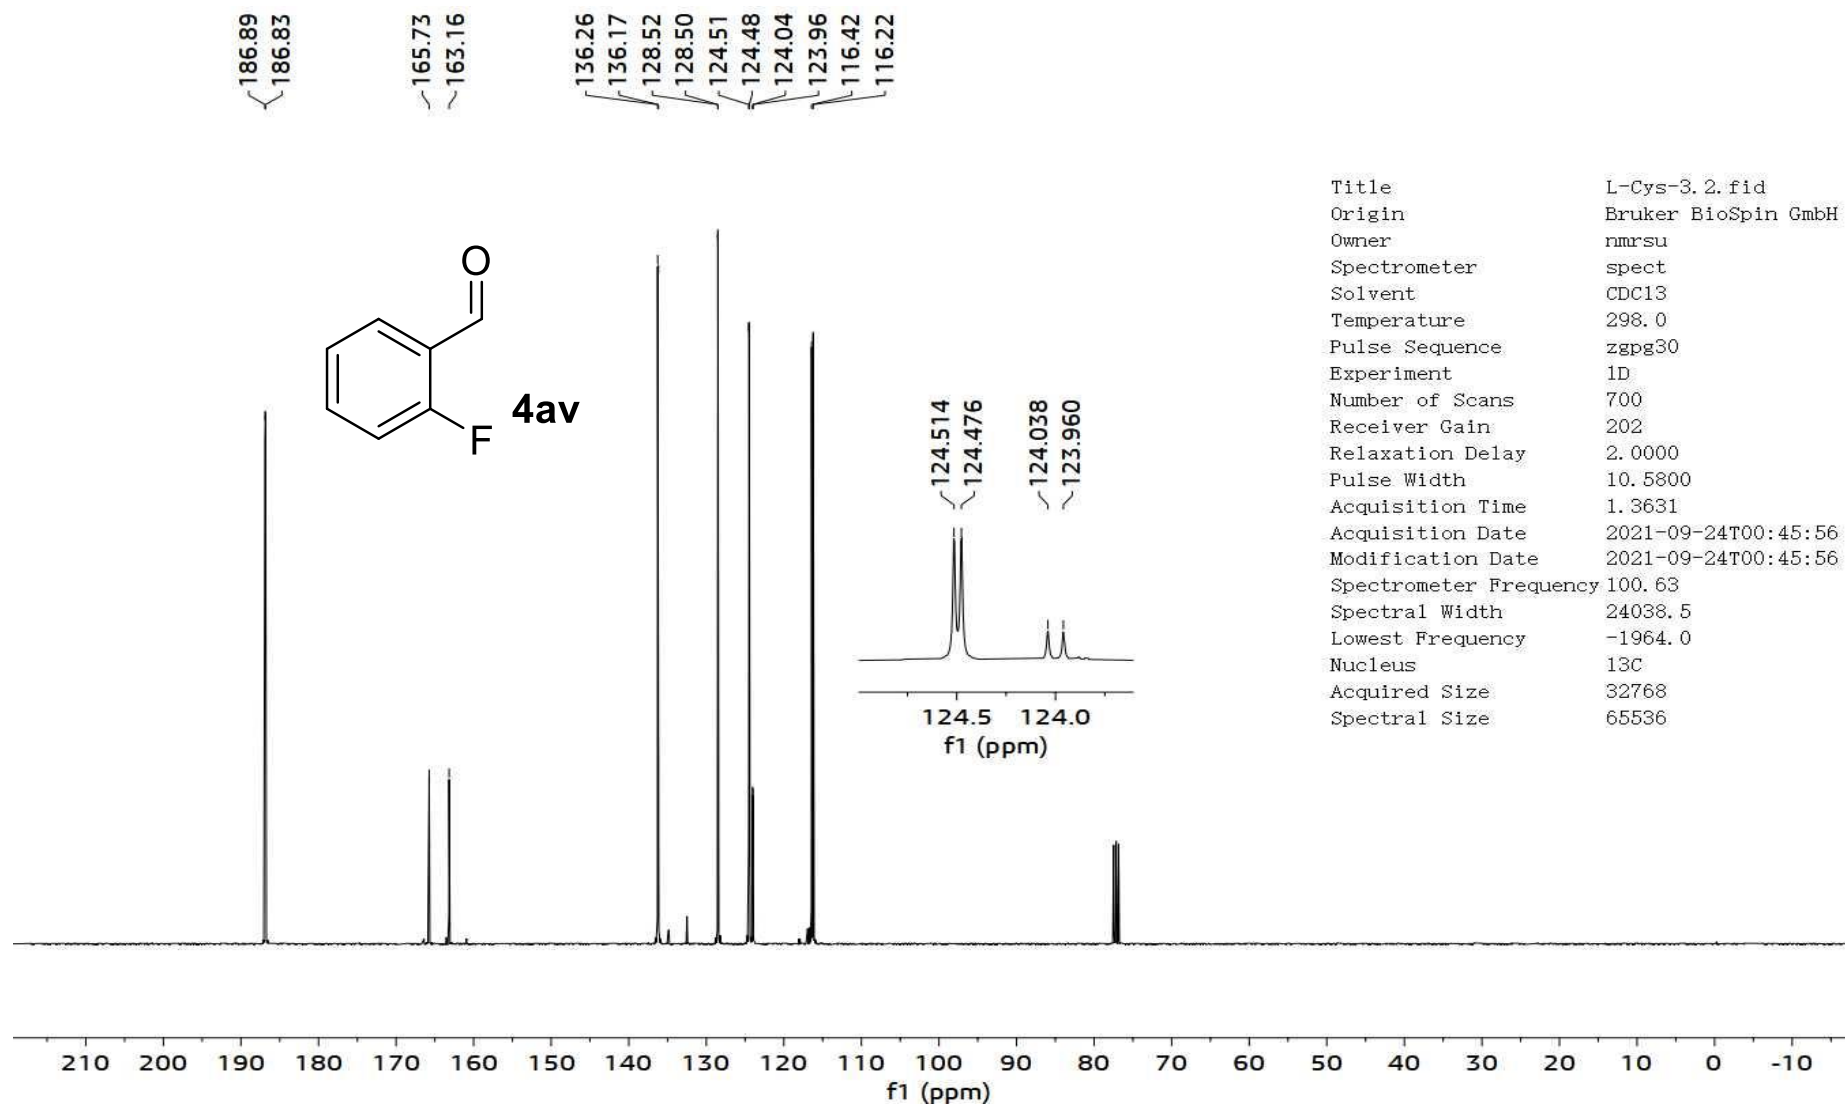

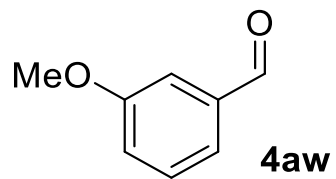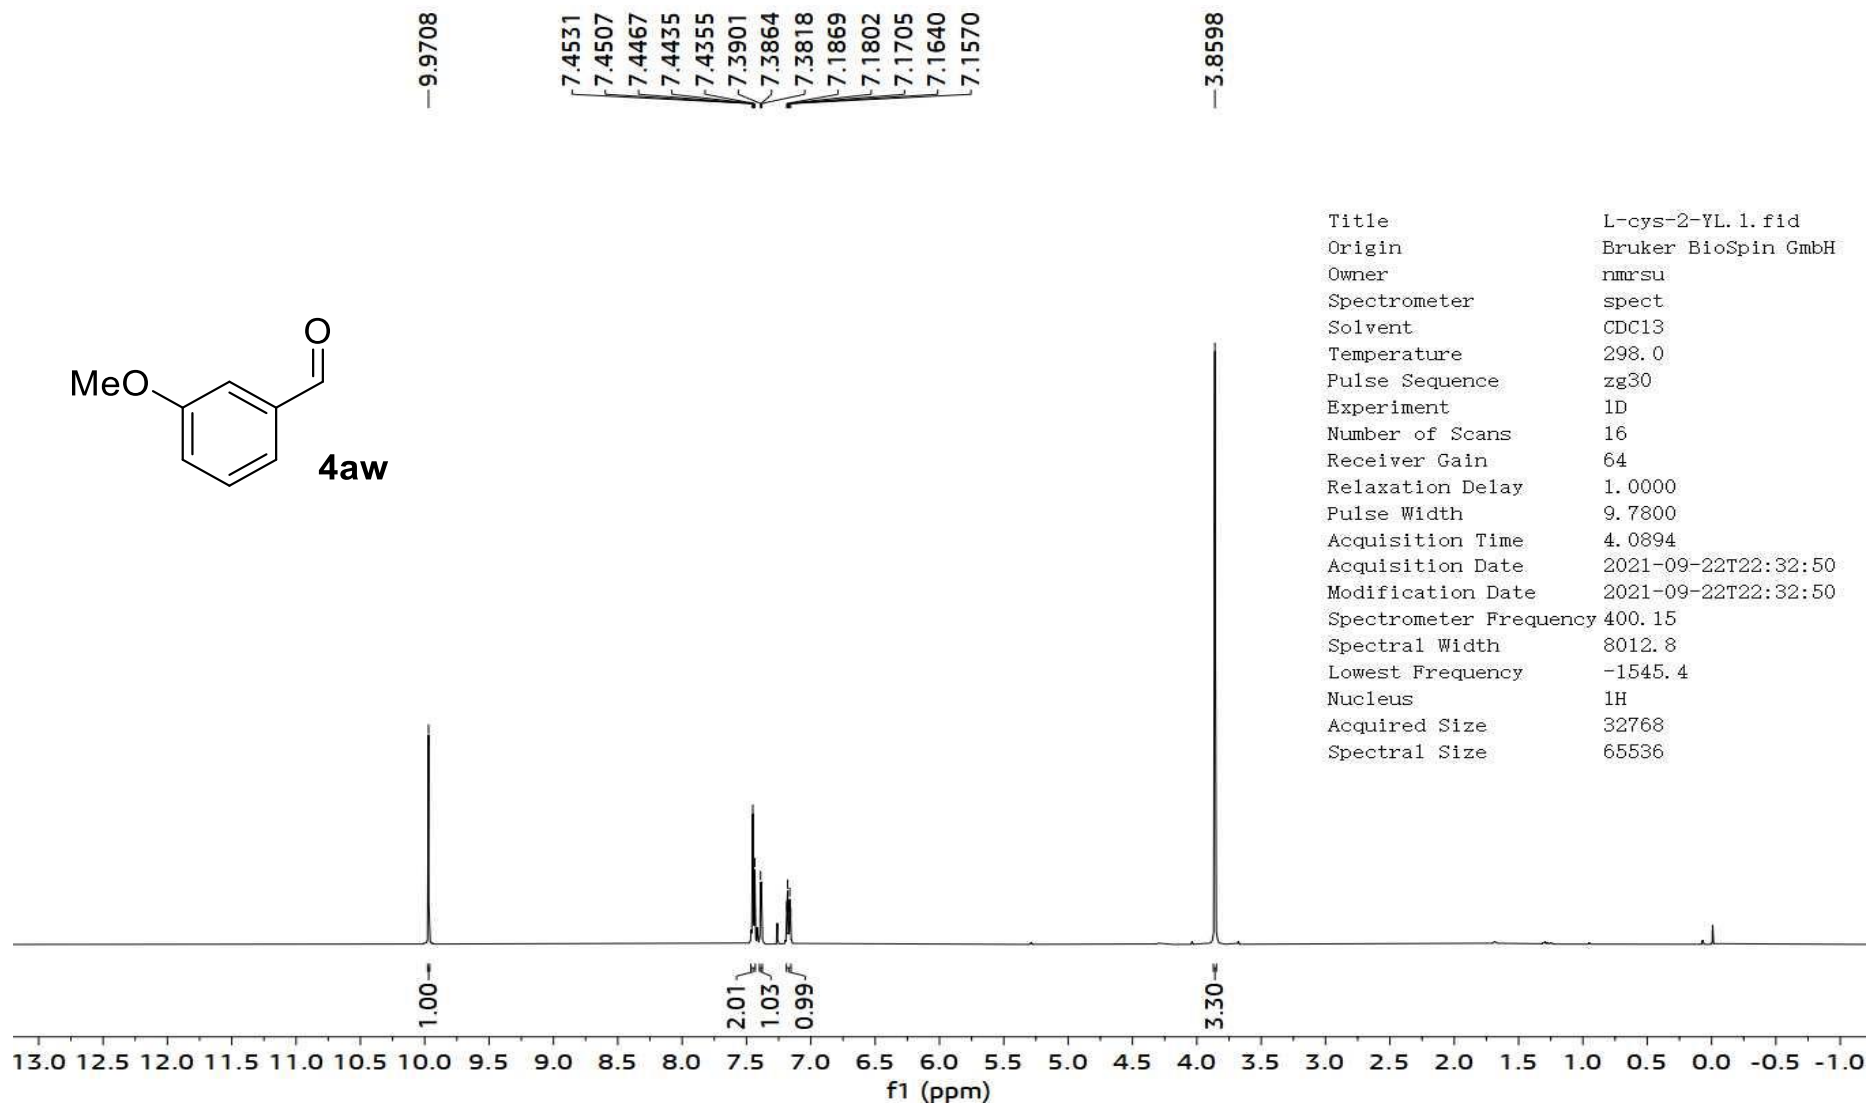

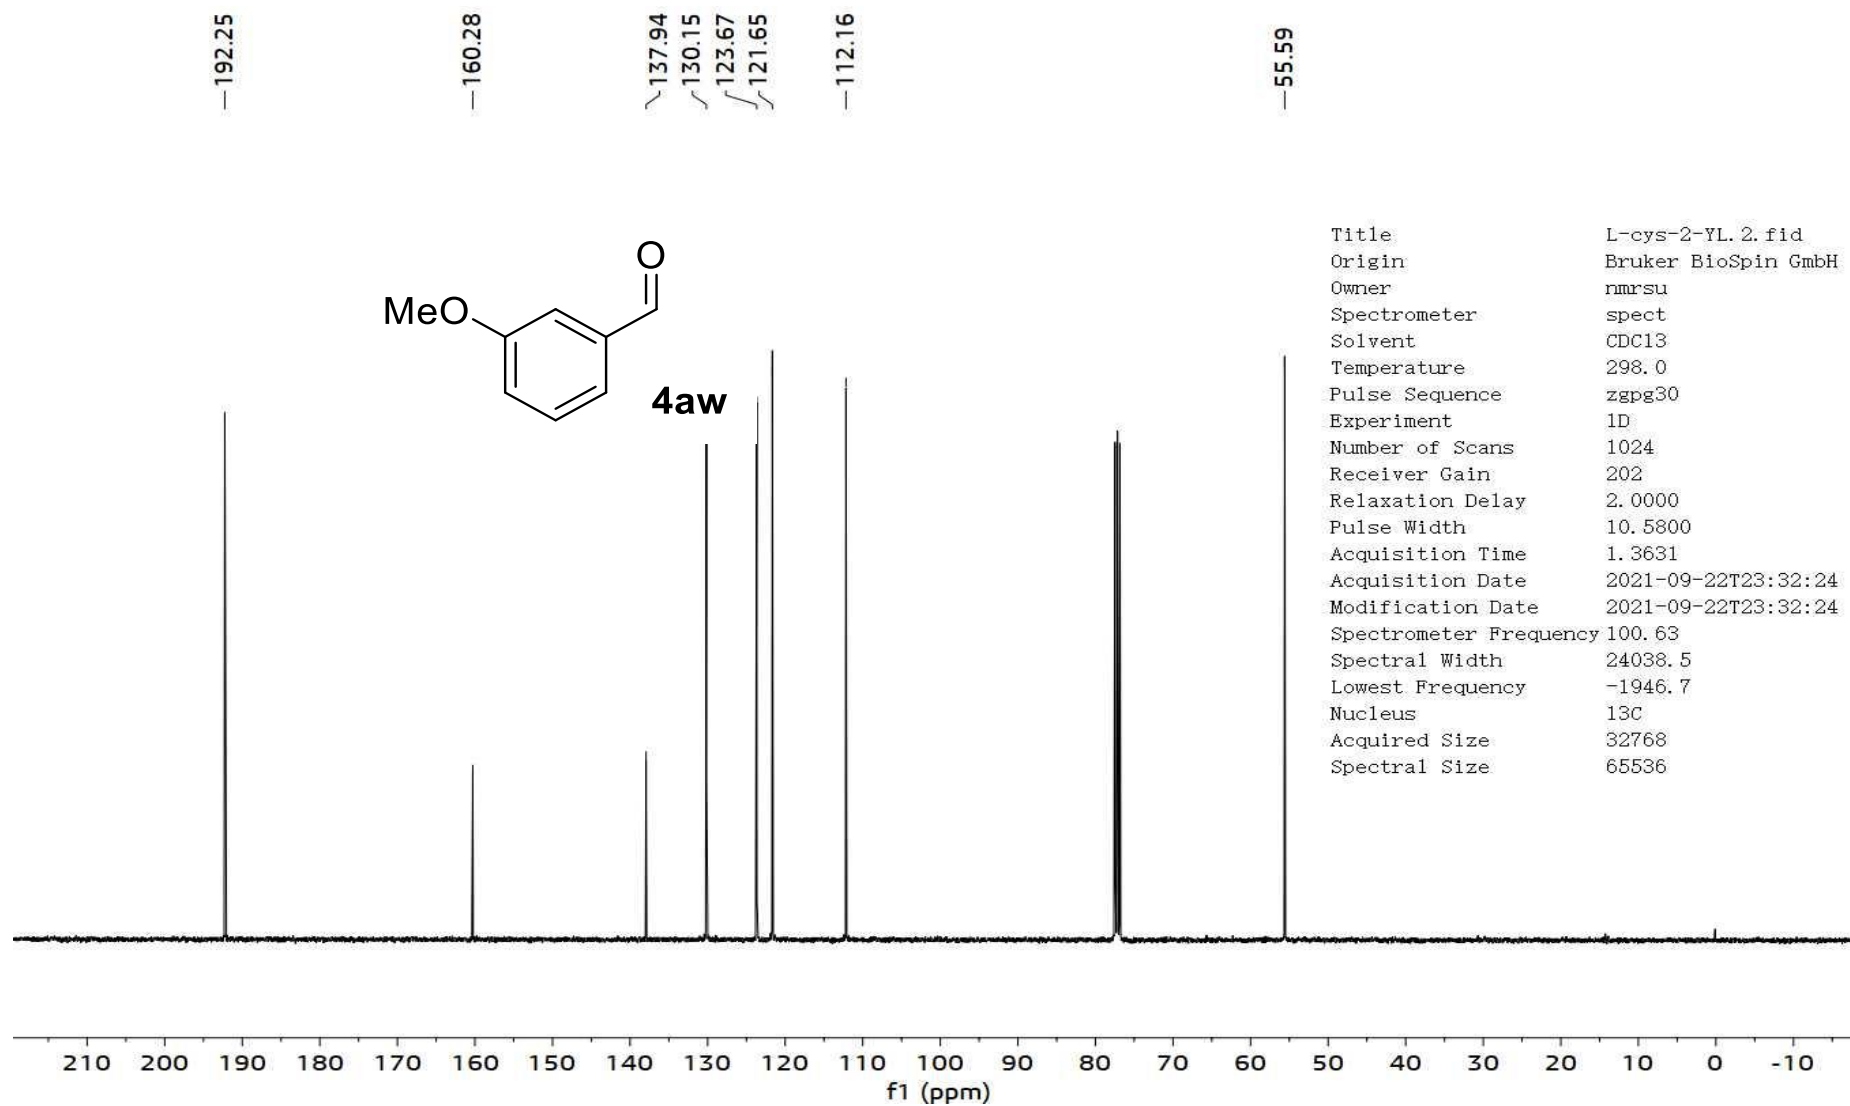

|                        |                     |
|------------------------|---------------------|
| Title                  | L-cys-2-YL. 2. fid  |
| Origin                 | Bruker BioSpin GmbH |
| Owner                  | nmrsu               |
| Spectrometer           | spect               |
| Solvent                | CDCl3               |
| Temperature            | 298.0               |
| Pulse Sequence         | zgpg30              |
| Experiment             | 1D                  |
| Number of Scans        | 1024                |
| Receiver Gain          | 202                 |
| Relaxation Delay       | 2.0000              |
| Pulse Width            | 10.5800             |
| Acquisition Time       | 1.3631              |
| Acquisition Date       | 2021-09-22T23:32:24 |
| Modification Date      | 2021-09-22T23:32:24 |
| Spectrometer Frequency | 100.63              |
| Spectral Width         | 24038.5             |
| Lowest Frequency       | -1946.7             |
| Nucleus                | 13C                 |
| Acquired Size          | 32768               |
| Spectral Size          | 65536               |

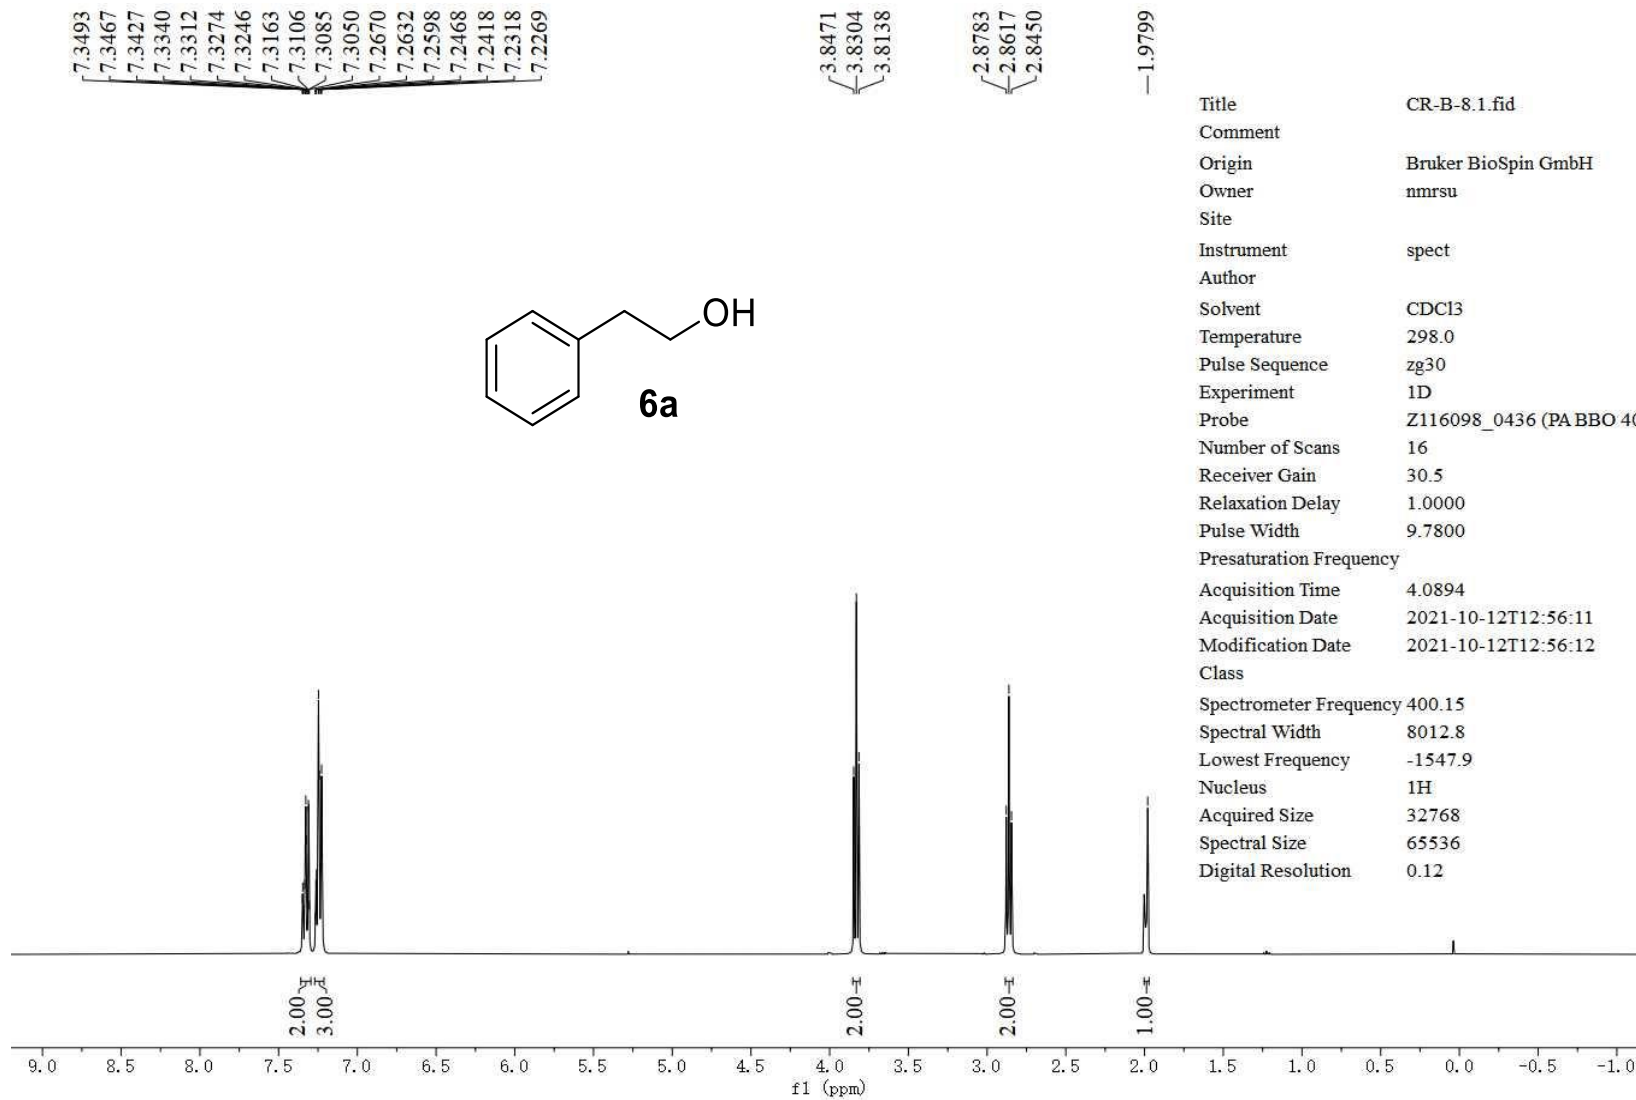

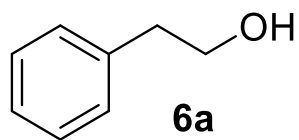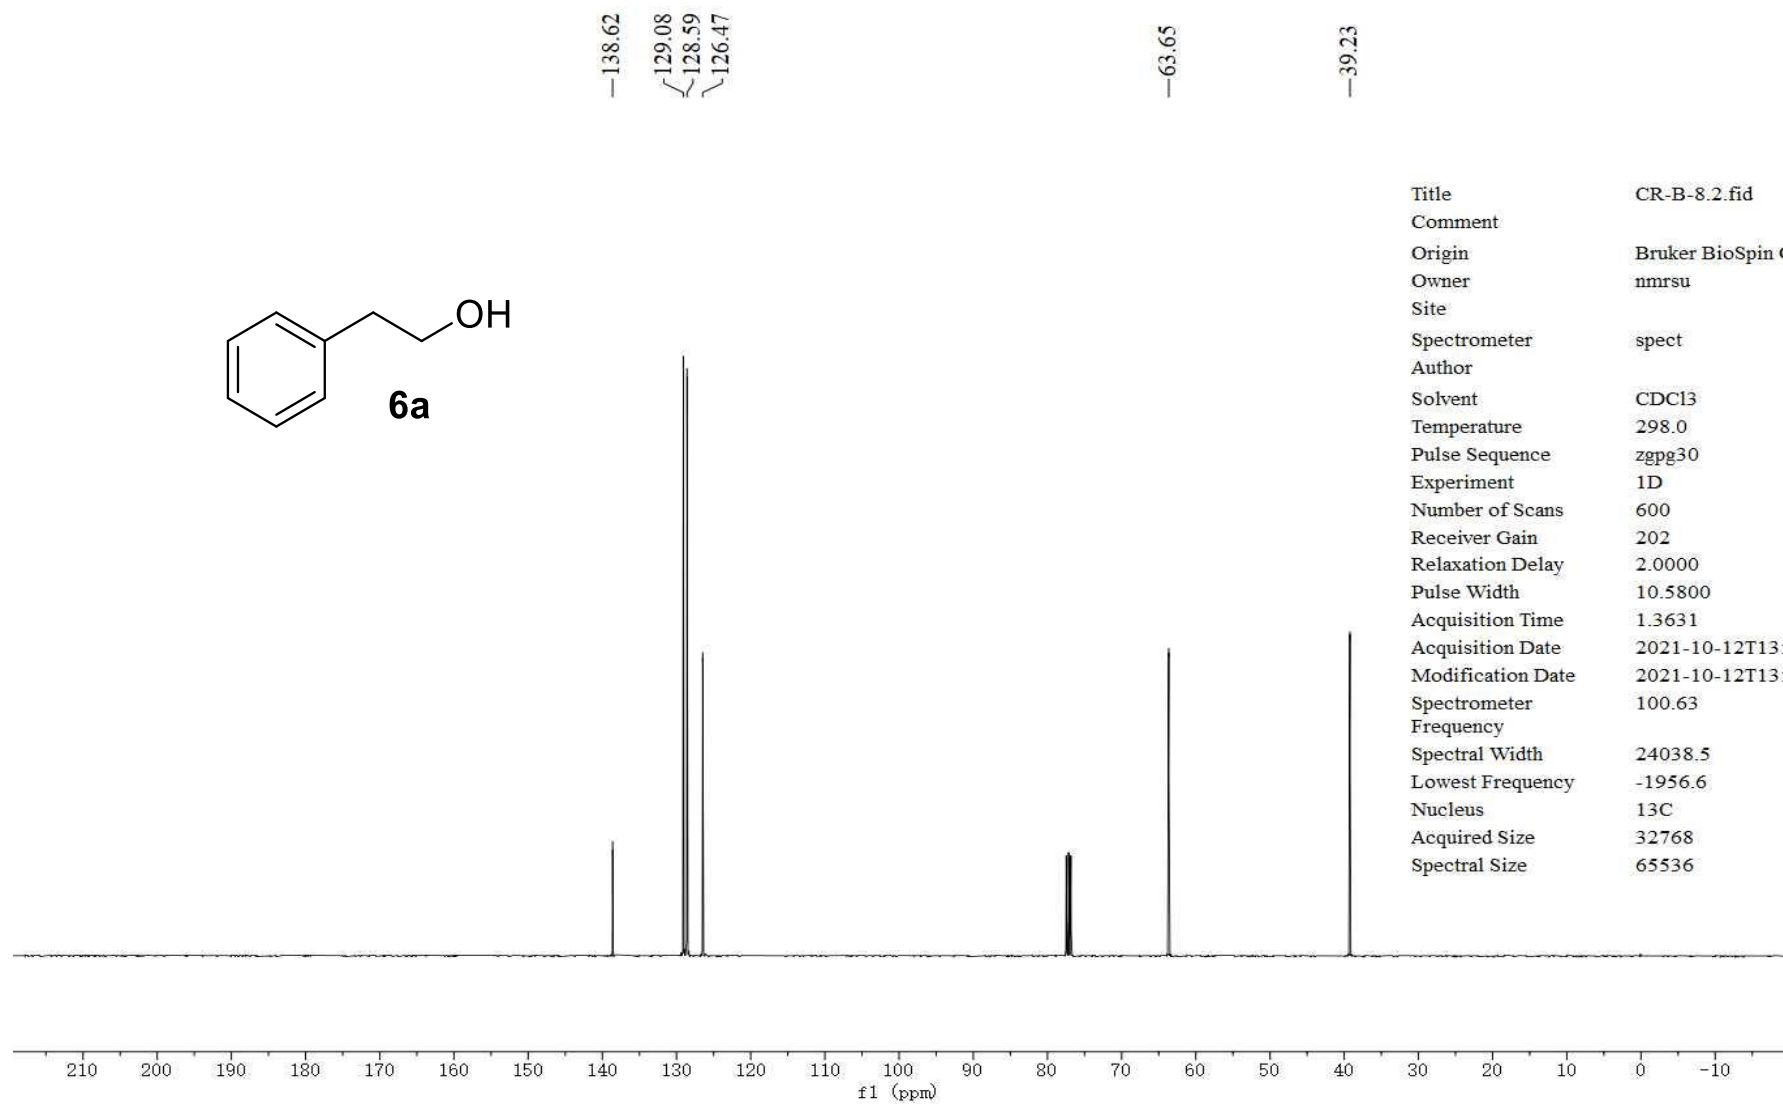

|                   |                     |
|-------------------|---------------------|
| Title             | CR-B-8.2.fid        |
| Comment           |                     |
| Origin            | Bruker BioSpin GmbH |
| Owner             | nmrsu               |
| Site              |                     |
| Spectrometer      | spect               |
| Author            |                     |
| Solvent           | CDCl3               |
| Temperature       | 298.0               |
| Pulse Sequence    | zgpg30              |
| Experiment        | 1D                  |
| Number of Scans   | 600                 |
| Receiver Gain     | 202                 |
| Relaxation Delay  | 2.0000              |
| Pulse Width       | 10.5800             |
| Acquisition Time  | 1.3631              |
| Acquisition Date  | 2021-10-12T13:31:33 |
| Modification Date | 2021-10-12T13:31:34 |
| Spectrometer      | 100.63              |
| Frequency         |                     |
| Spectral Width    | 24038.5             |
| Lowest Frequency  | -1956.6             |
| Nucleus           | 13C                 |
| Acquired Size     | 32768               |
| Spectral Size     | 65536               |

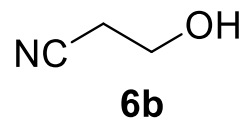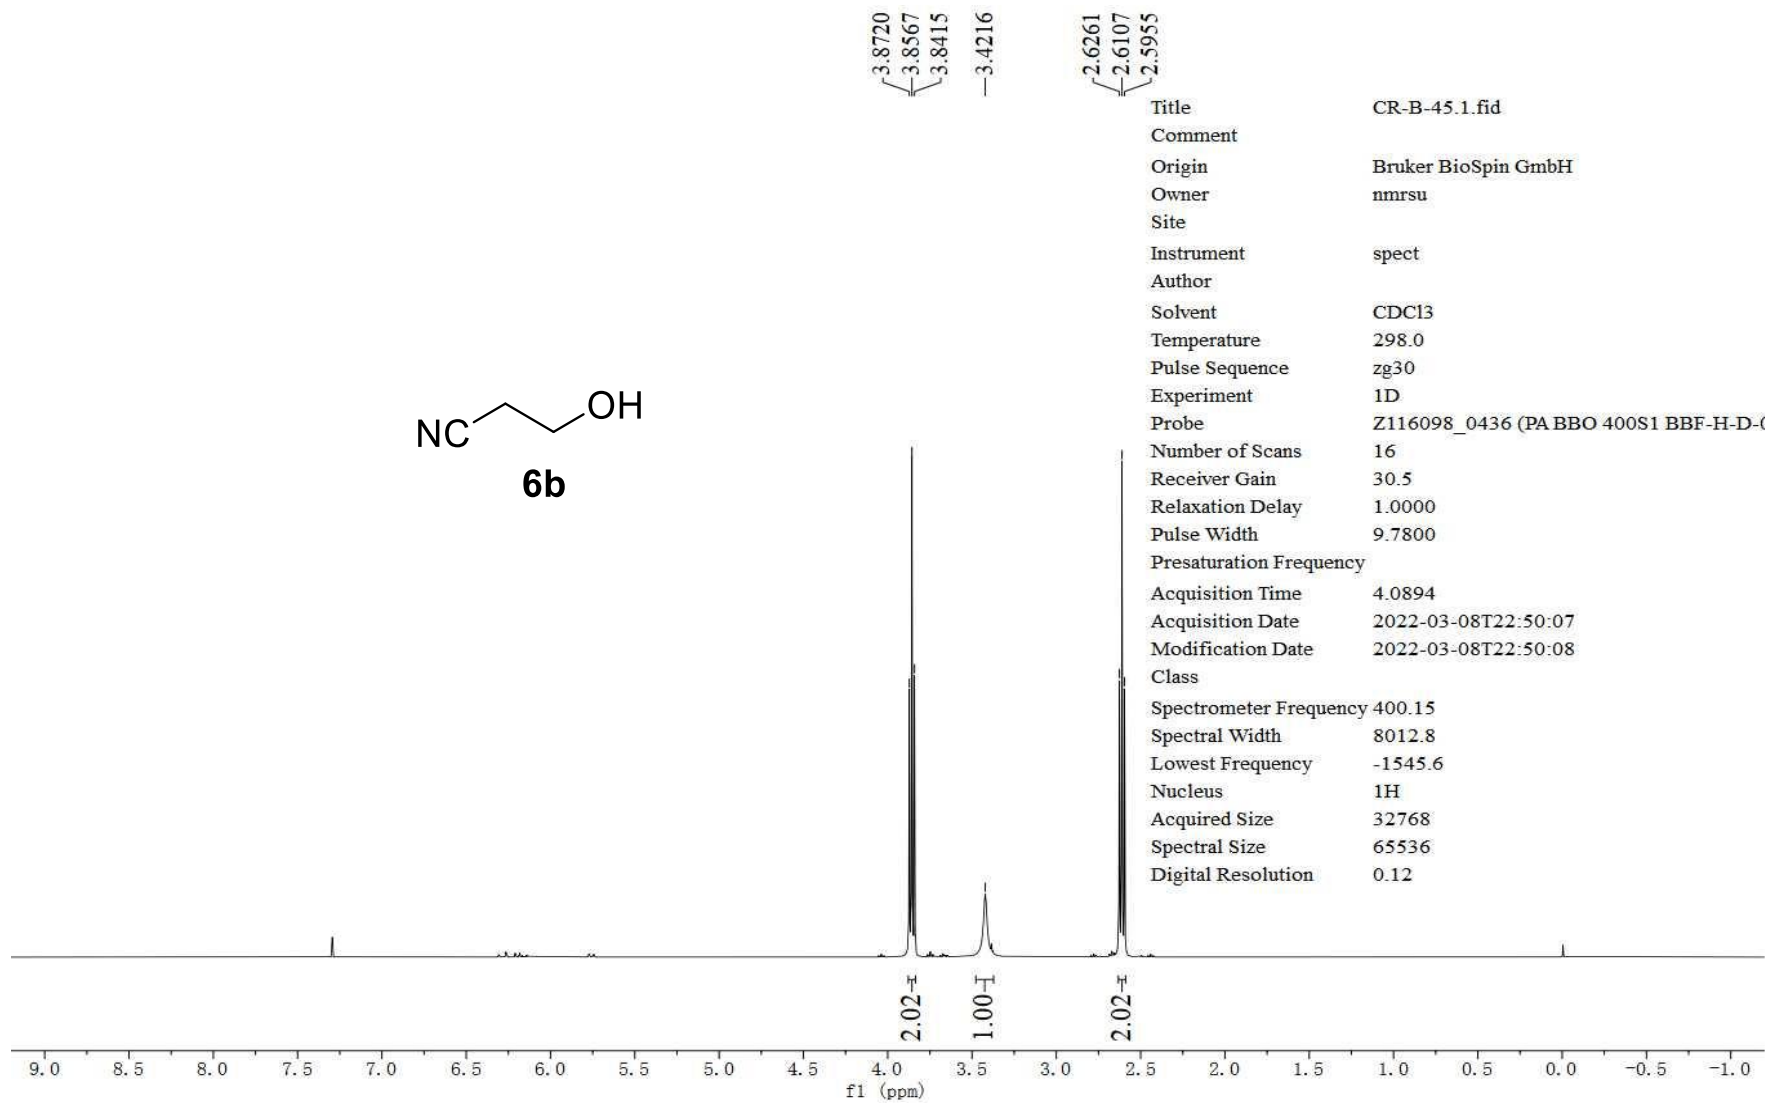



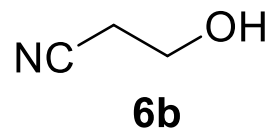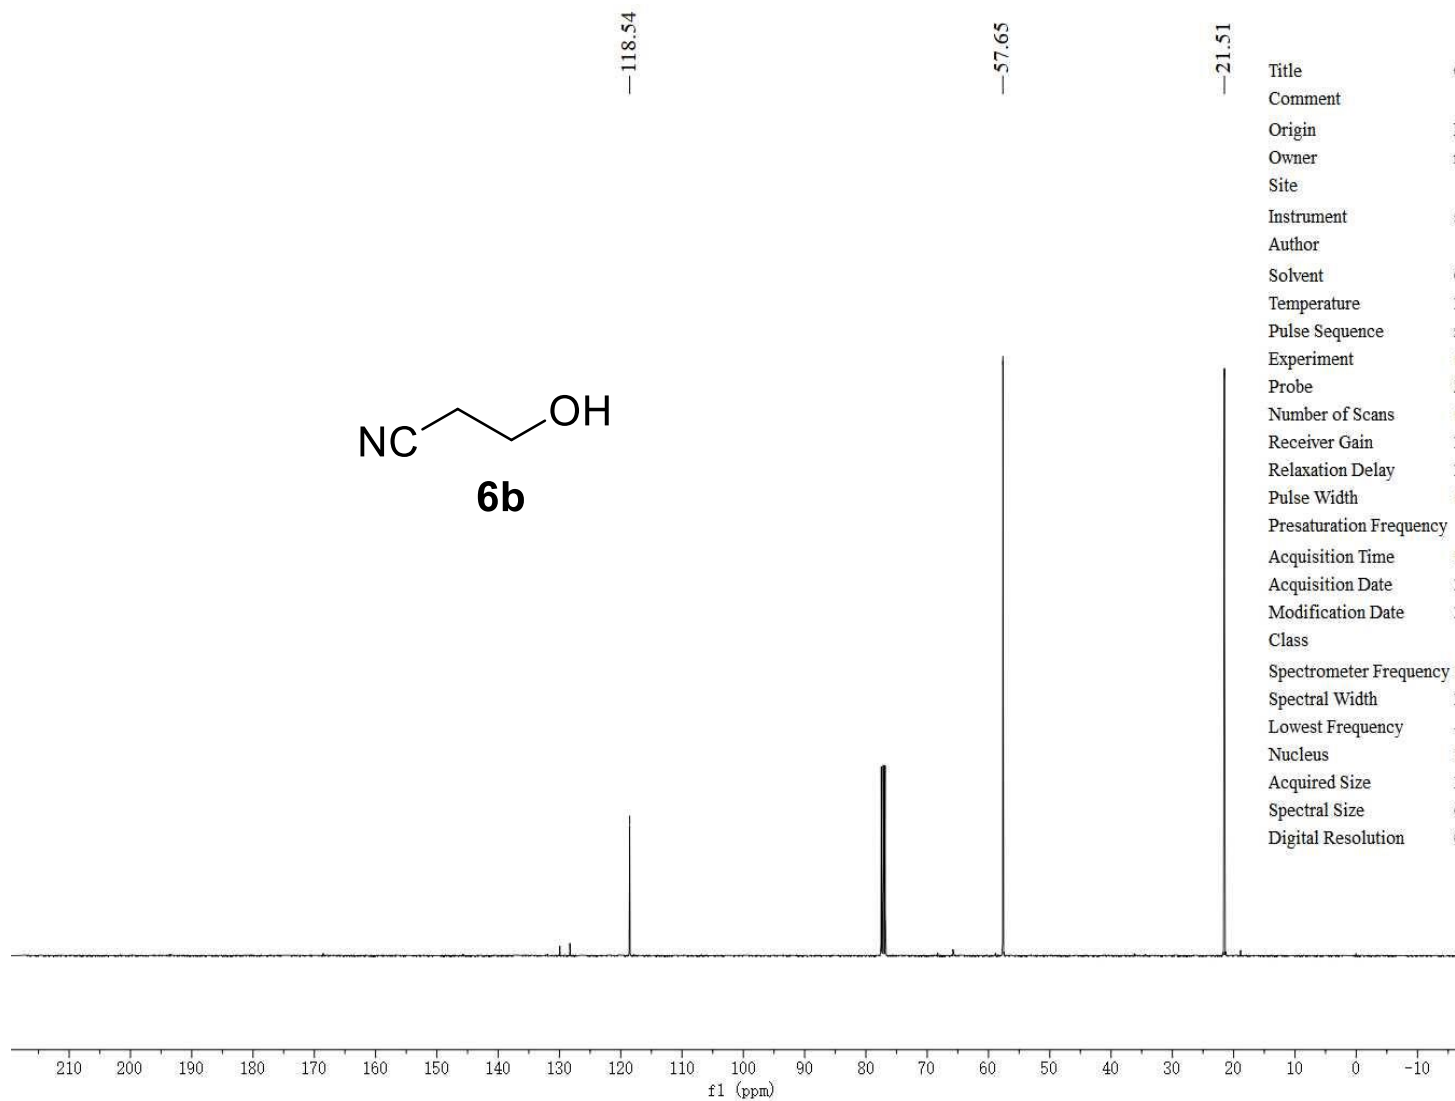

|                         |                                             |
|-------------------------|---------------------------------------------|
| Title                   | CR-B-45.2.fid                               |
| Comment                 |                                             |
| Origin                  | Bruker BioSpin GmbH                         |
| Owner                   | nmrsu                                       |
| Site                    |                                             |
| Instrument              | spect                                       |
| Author                  |                                             |
| Solvent                 | CDCl3                                       |
| Temperature             | 298.0                                       |
| Pulse Sequence          | zgpg30                                      |
| Experiment              | 1D                                          |
| Probe                   | Z116098_0436 (PA BBO 400S1 BBF-H-D-05 Z SP) |
| Number of Scans         | 1024                                        |
| Receiver Gain           | 202.1                                       |
| Relaxation Delay        | 2.0000                                      |
| Pulse Width             | 10.5800                                     |
| Presaturation Frequency |                                             |
| Acquisition Time        | 1.3631                                      |
| Acquisition Date        | 2022-03-08T23:49:46                         |
| Modification Date       | 2022-03-08T23:49:48                         |
| Class                   |                                             |
| Spectrometer Frequency  | 100.63                                      |
| Spectral Width          | 24038.5                                     |
| Lowest Frequency        | -1955.5                                     |
| Nucleus                 | 13C                                         |
| Acquired Size           | 32768                                       |
| Spectral Size           | 65536                                       |
| Digital Resolution      | 0.37                                        |

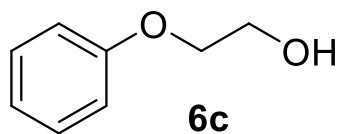

7.3159  
7.2973  
7.2782  
6.9962  
6.9778  
6.9595  
6.9386  
6.9187

4.0861  
4.0755  
4.0647  
3.9649  
3.9543  
3.9439

-2.5276

| Parameter              | Value               |
|------------------------|---------------------|
| Title                  | CR-B-49.21.fid      |
| Comment                | CR-B-49-H           |
| Origin                 | Bruker BioSpin GmbH |
| Owner                  | nmrsu               |
| Site                   |                     |
| Spectrometer           | Avance NEO          |
| Author                 |                     |
| Solvent                | CDCl3               |
| Temperature            | 298.8               |
| Pulse Sequence         | zg30                |
| Experiment             | 1D                  |
| Number of Scans        | 16                  |
| Receiver Gain          | 32                  |
| Relaxation Delay       | 1.0000              |
| Pulse Width            | 8.0000              |
| Acquisition Time       | 3.9977              |
| Acquisition Date       | 2021-09-28T13:26:18 |
| Modification Date      | 2021-09-28T13:26:38 |
| Spectrometer Frequency | 400.13              |
| Spectral Width         | 8196.7              |
| Lowest Frequency       | -1651.3             |
| Nucleus                | 1H                  |
| Acquired Size          | 32768               |
| Spectral Size          | 65536               |

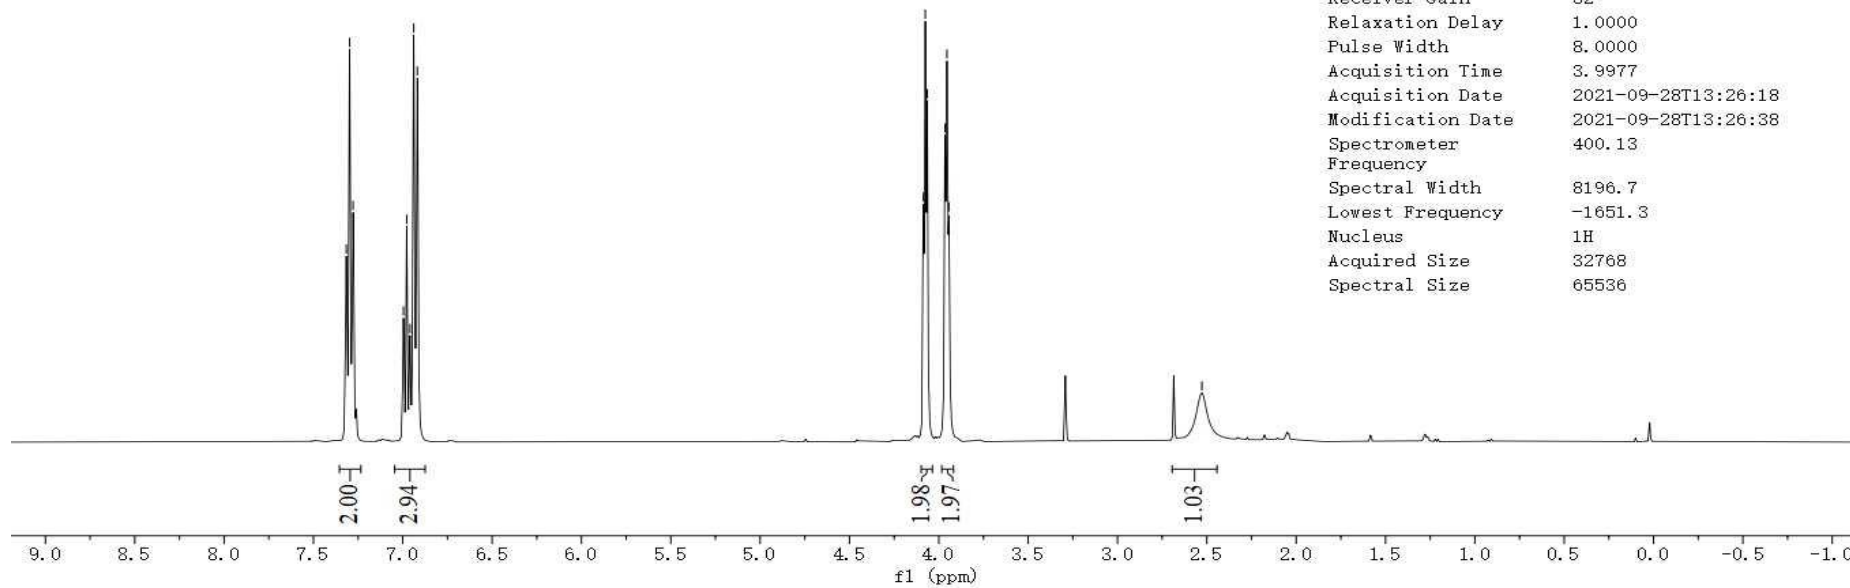

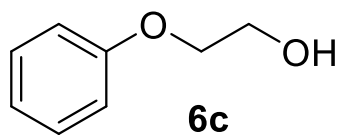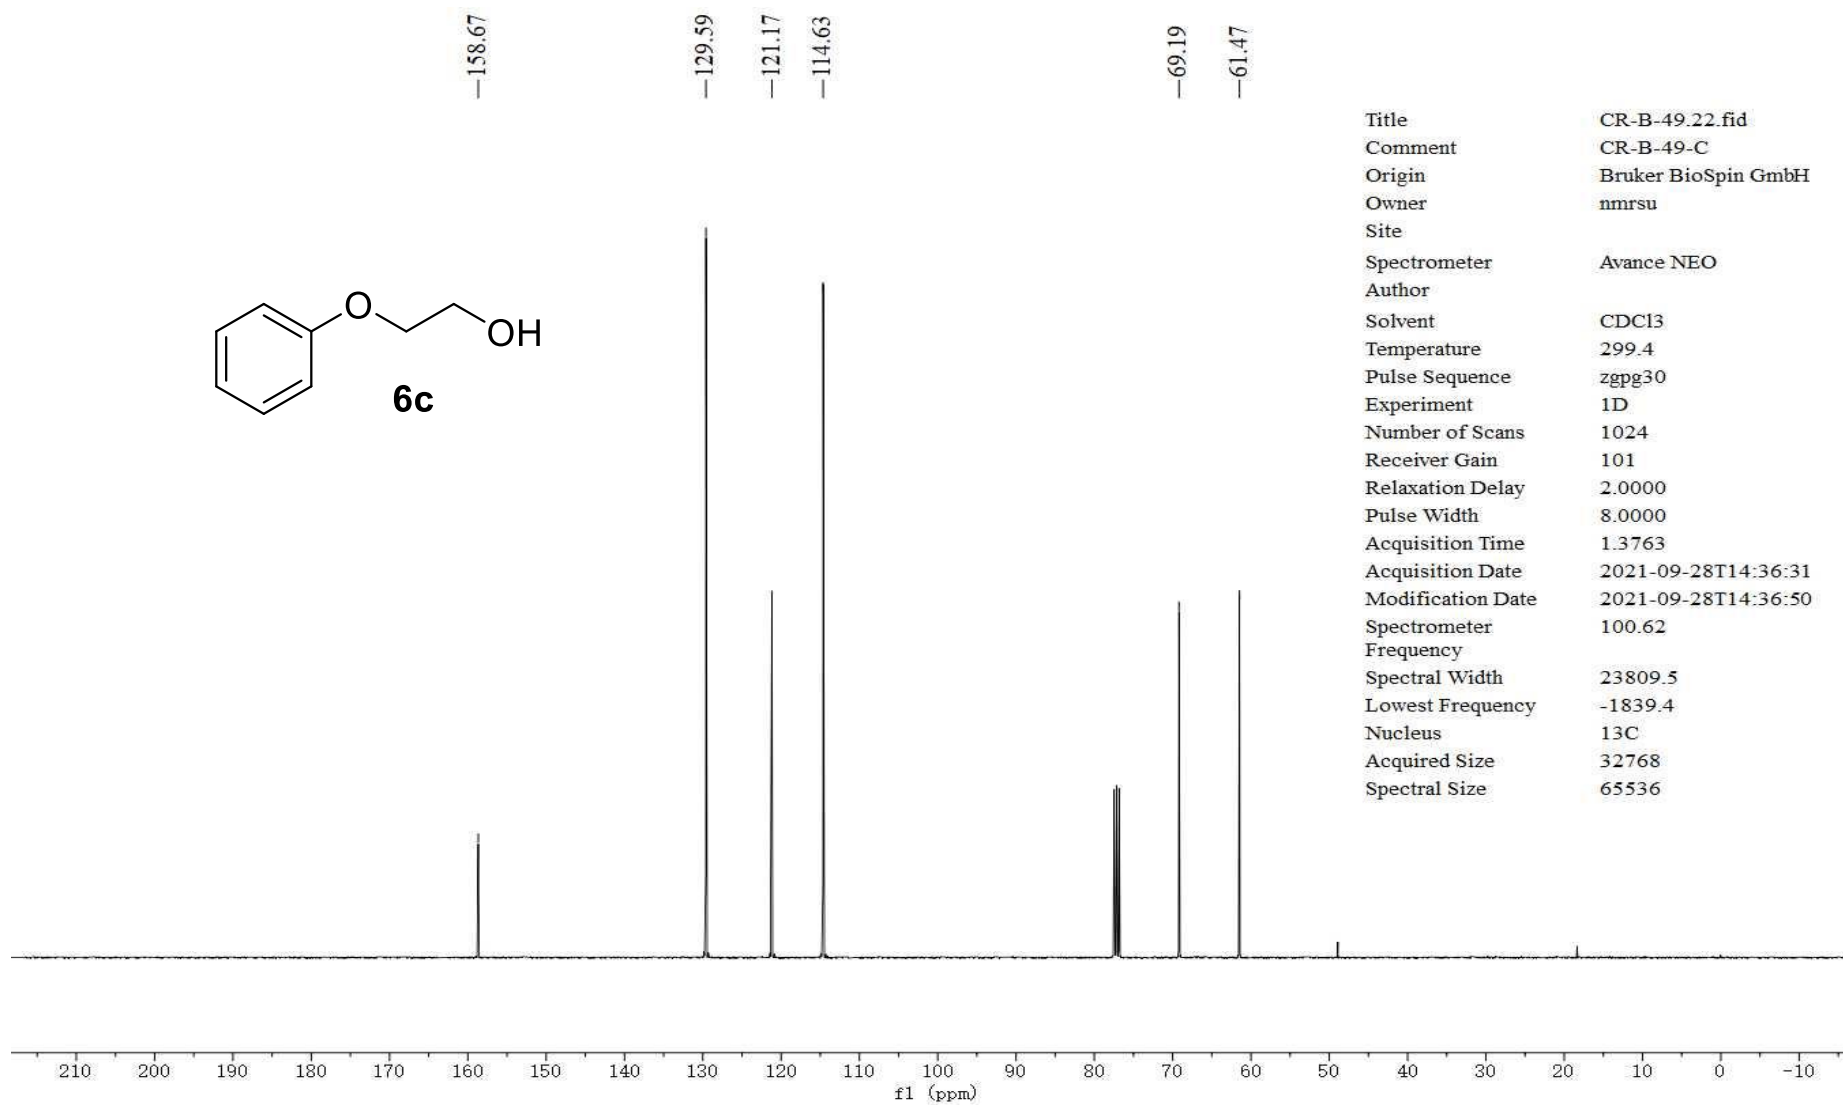

|                   |                     |
|-------------------|---------------------|
| Title             | CR-B-49.22.fid      |
| Comment           | CR-B-49-C           |
| Origin            | Bruker BioSpin GmbH |
| Owner             | nmrsu               |
| Site              |                     |
| Spectrometer      | Avance NEO          |
| Author            |                     |
| Solvent           | CDCl3               |
| Temperature       | 299.4               |
| Pulse Sequence    | zgpg30              |
| Experiment        | 1D                  |
| Number of Scans   | 1024                |
| Receiver Gain     | 101                 |
| Relaxation Delay  | 2.0000              |
| Pulse Width       | 8.0000              |
| Acquisition Time  | 1.3763              |
| Acquisition Date  | 2021-09-28T14:36:31 |
| Modification Date | 2021-09-28T14:36:50 |
| Spectrometer      | 100.62              |
| Frequency         |                     |
| Spectral Width    | 23809.5             |
| Lowest Frequency  | -1839.4             |
| Nucleus           | 13C                 |
| Acquired Size     | 32768               |
| Spectral Size     | 65536               |

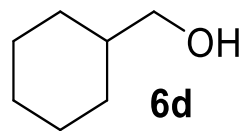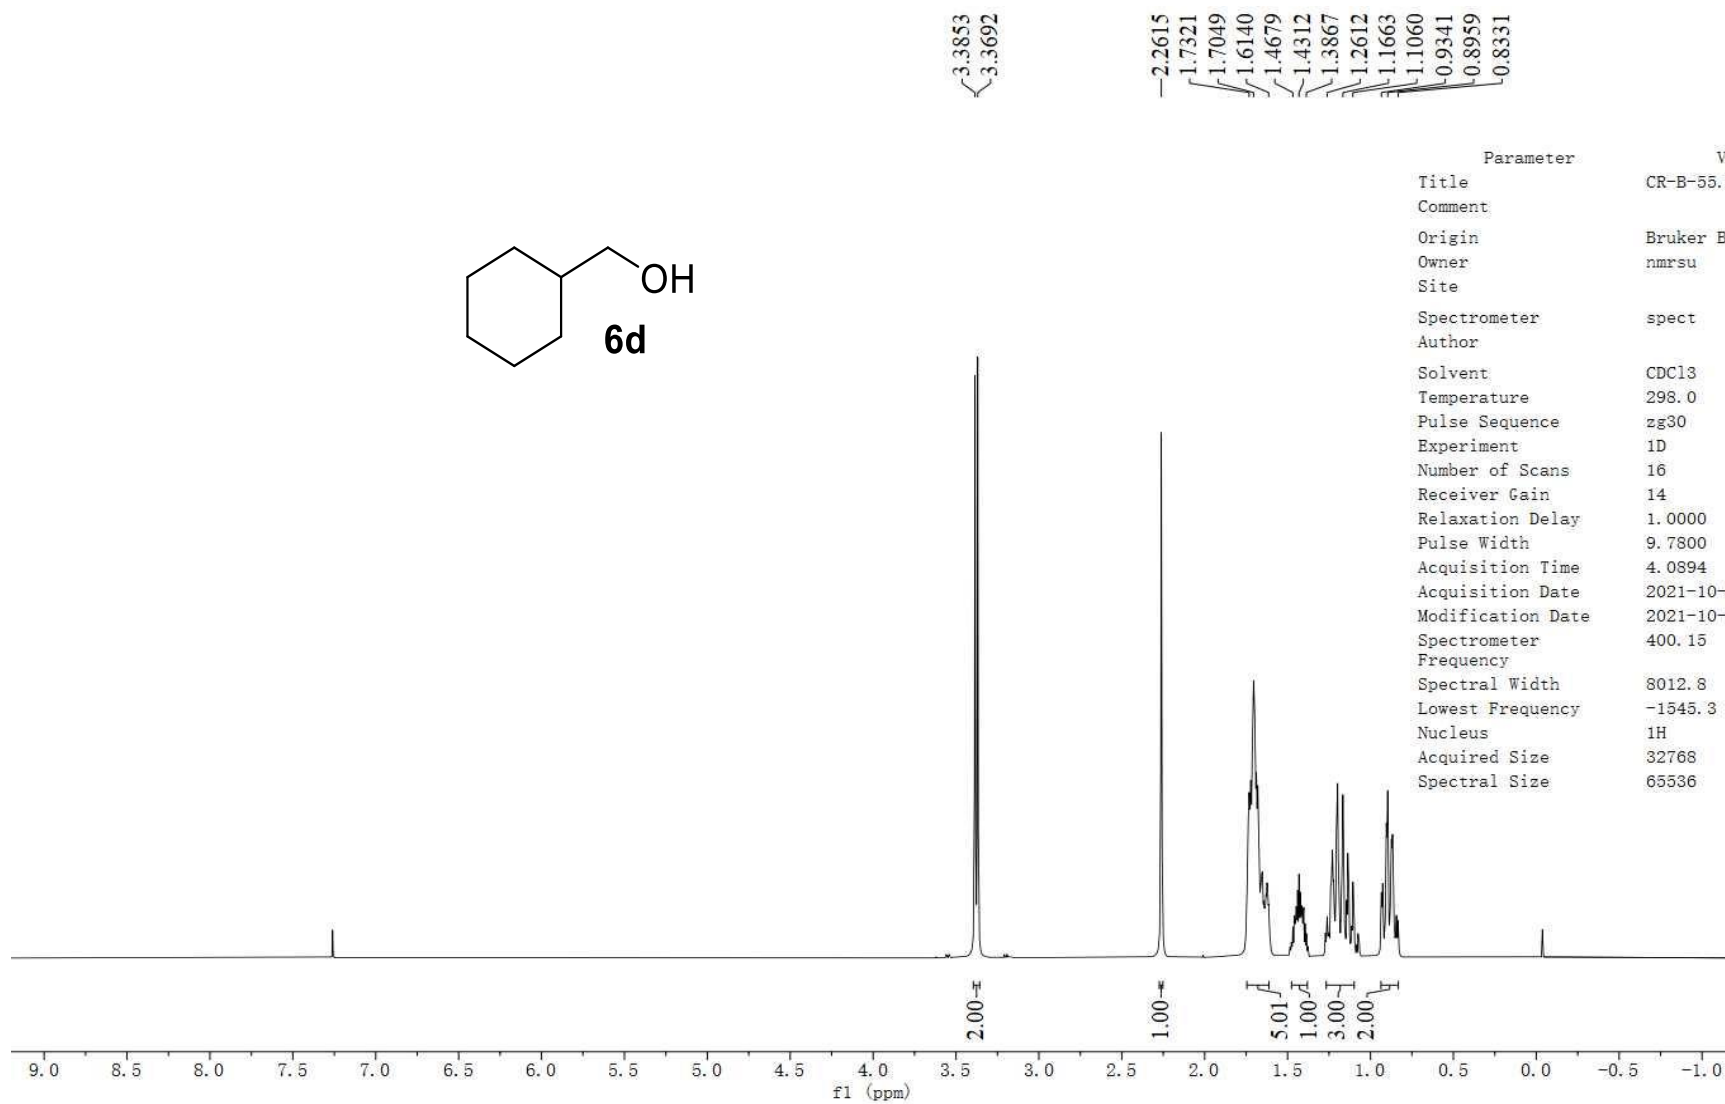

| Parameter         | Value               |
|-------------------|---------------------|
| Title             | CR-B-55.3.fid       |
| Comment           |                     |
| Origin            | Bruker BioSpin GmbH |
| Owner             | nmrsu               |
| Site              |                     |
| Spectrometer      | spect               |
| Author            |                     |
| Solvent           | CDCl3               |
| Temperature       | 298.0               |
| Pulse Sequence    | zg30                |
| Experiment        | 1D                  |
| Number of Scans   | 16                  |
| Receiver Gain     | 14                  |
| Relaxation Delay  | 1.0000              |
| Pulse Width       | 9.7800              |
| Acquisition Time  | 4.0894              |
| Acquisition Date  | 2021-10-15T13:07:18 |
| Modification Date | 2021-10-15T13:07:20 |
| Spectrometer      | 400.15              |
| Frequency         |                     |
| Spectral Width    | 8012.8              |
| Lowest Frequency  | -1545.3             |
| Nucleus           | 1H                  |
| Acquired Size     | 32768               |
| Spectral Size     | 65536               |

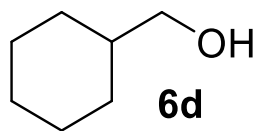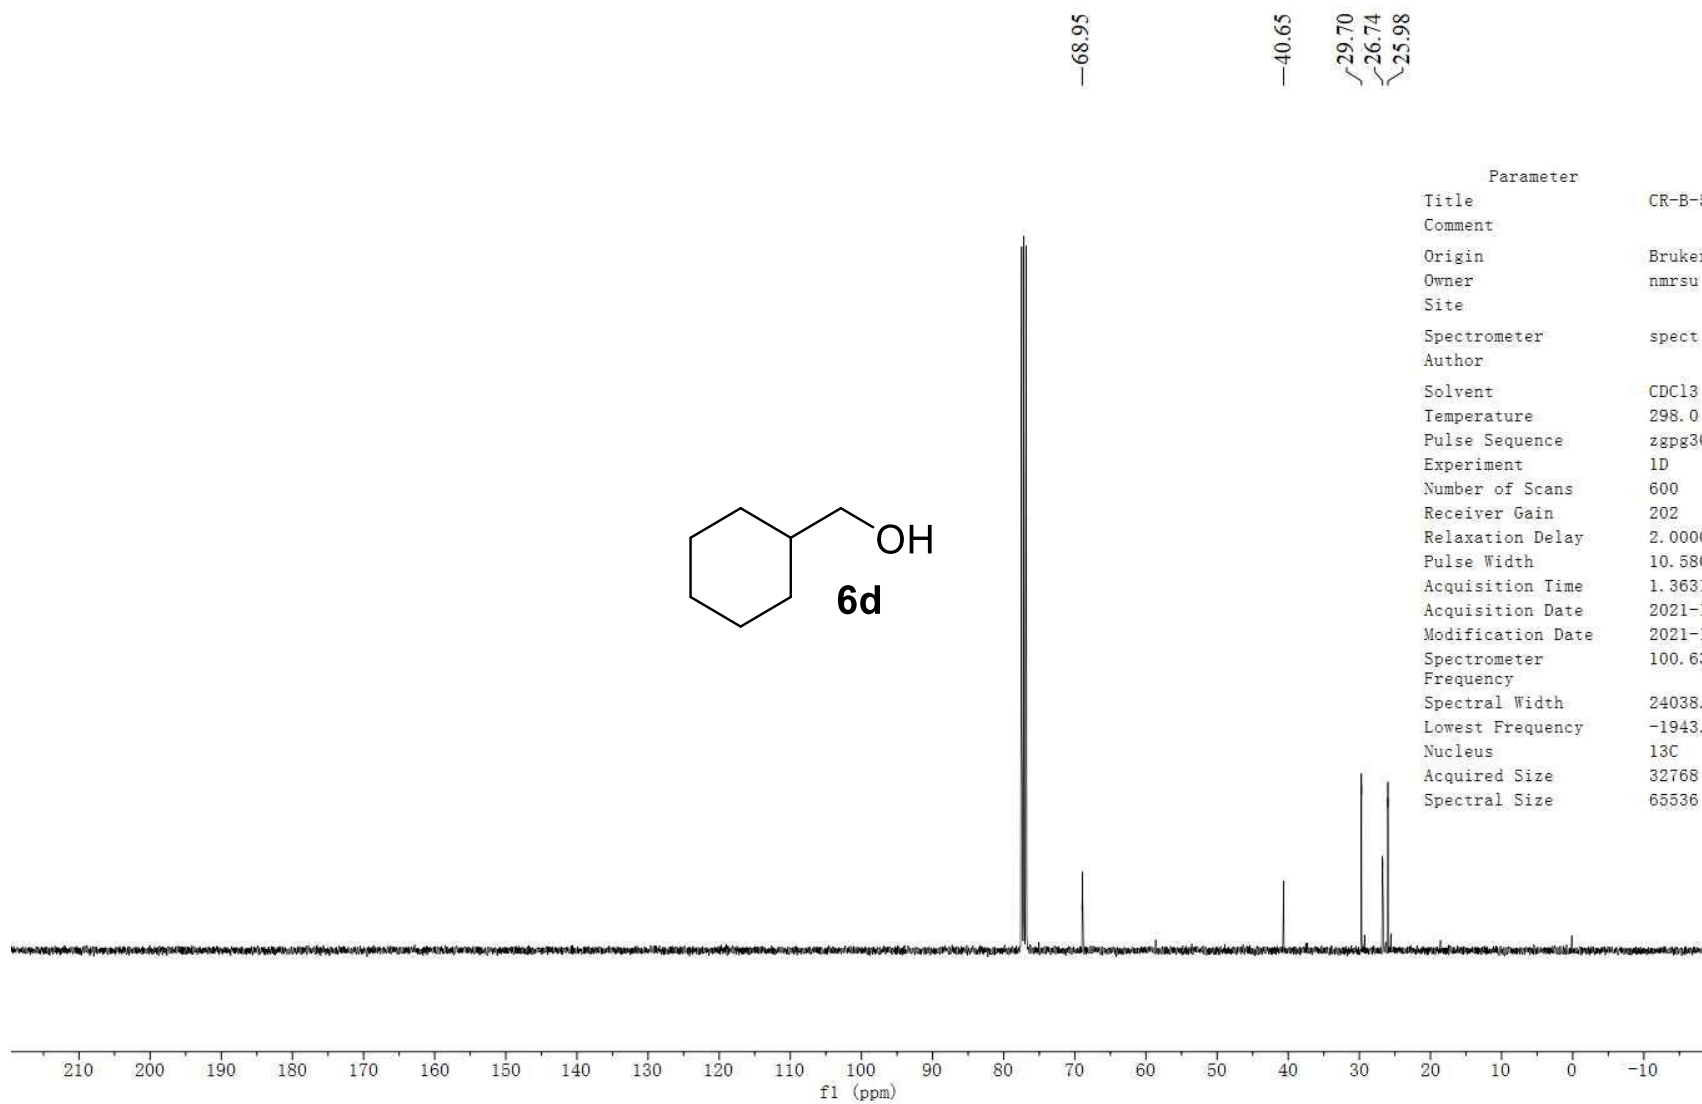

| Parameter         | Value               |
|-------------------|---------------------|
| Title             | CR-B-55.2.fid       |
| Comment           |                     |
| Origin            | Bruker BioSpin GmbH |
| Owner             | nmrsu               |
| Site              |                     |
| Spectrometer      | spect               |
| Author            |                     |
| Solvent           | CDCl3               |
| Temperature       | 298.0               |
| Pulse Sequence    | zgpg30              |
| Experiment        | 1D                  |
| Number of Scans   | 600                 |
| Receiver Gain     | 202                 |
| Relaxation Delay  | 2.0000              |
| Pulse Width       | 10.5800             |
| Acquisition Time  | 1.3631              |
| Acquisition Date  | 2021-10-12T23:17:56 |
| Modification Date | 2021-10-12T23:17:58 |
| Spectrometer      | 100.63              |
| Frequency         |                     |
| Spectral Width    | 24038.5             |
| Lowest Frequency  | -1943.8             |
| Nucleus           | 13C                 |
| Acquired Size     | 32768               |
| Spectral Size     | 65536               |

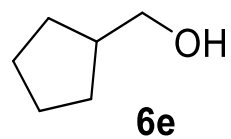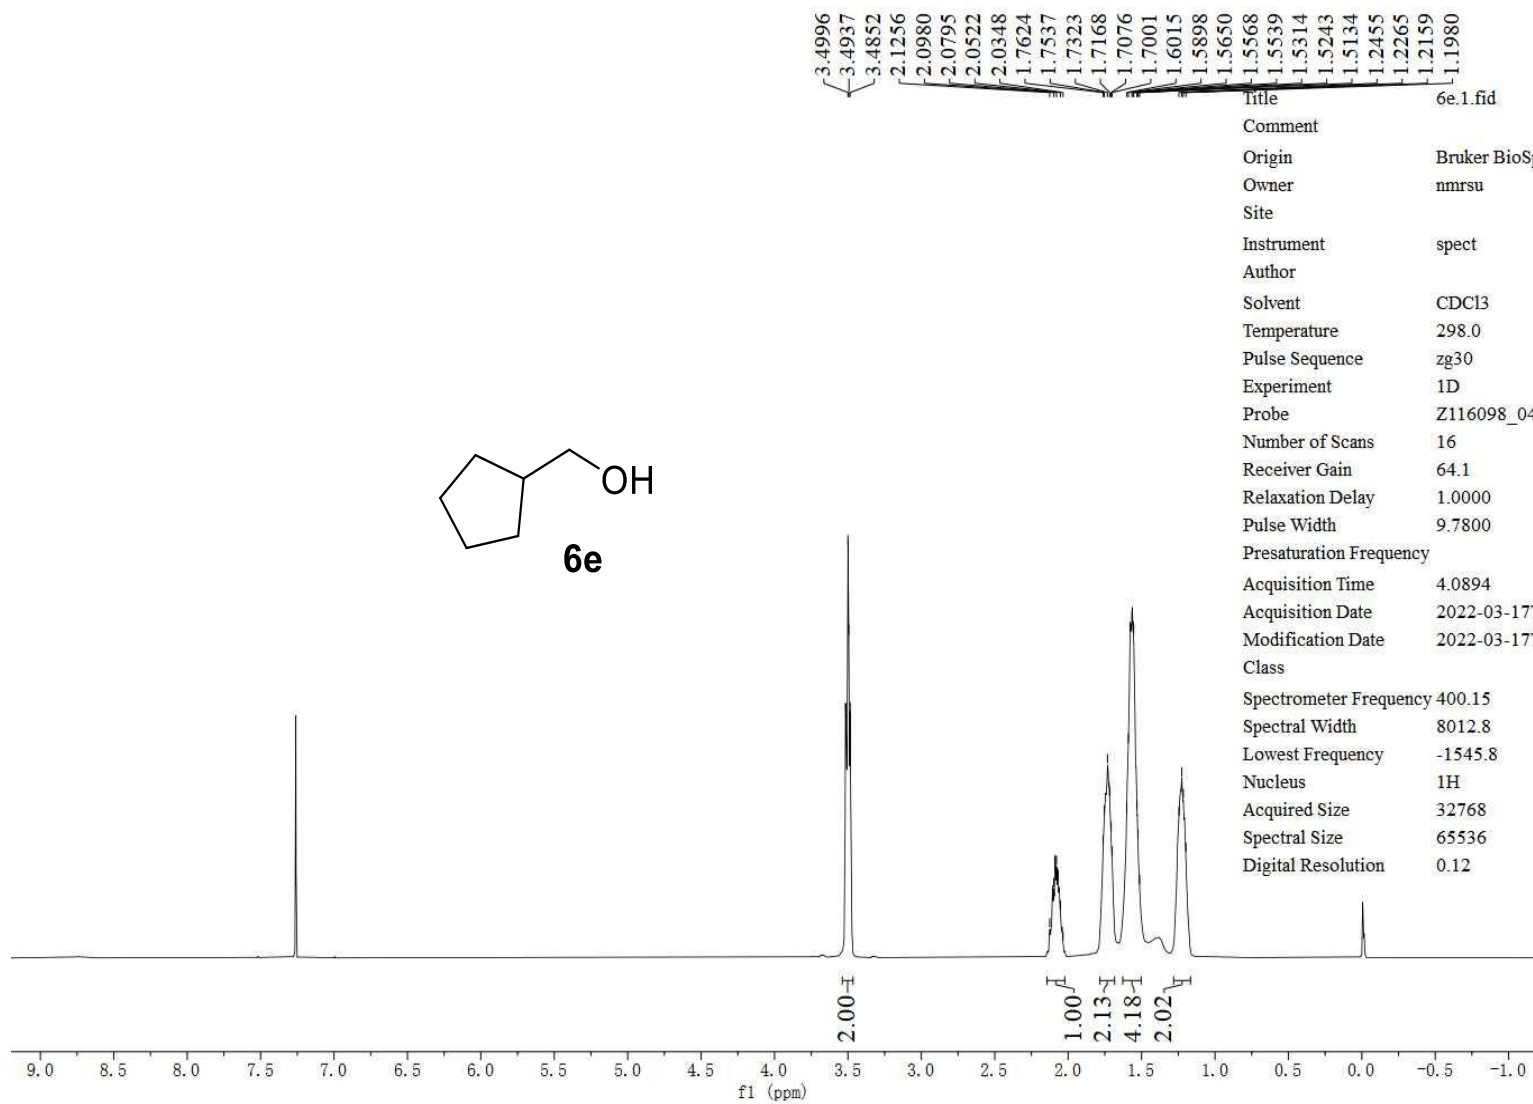

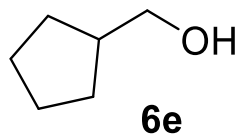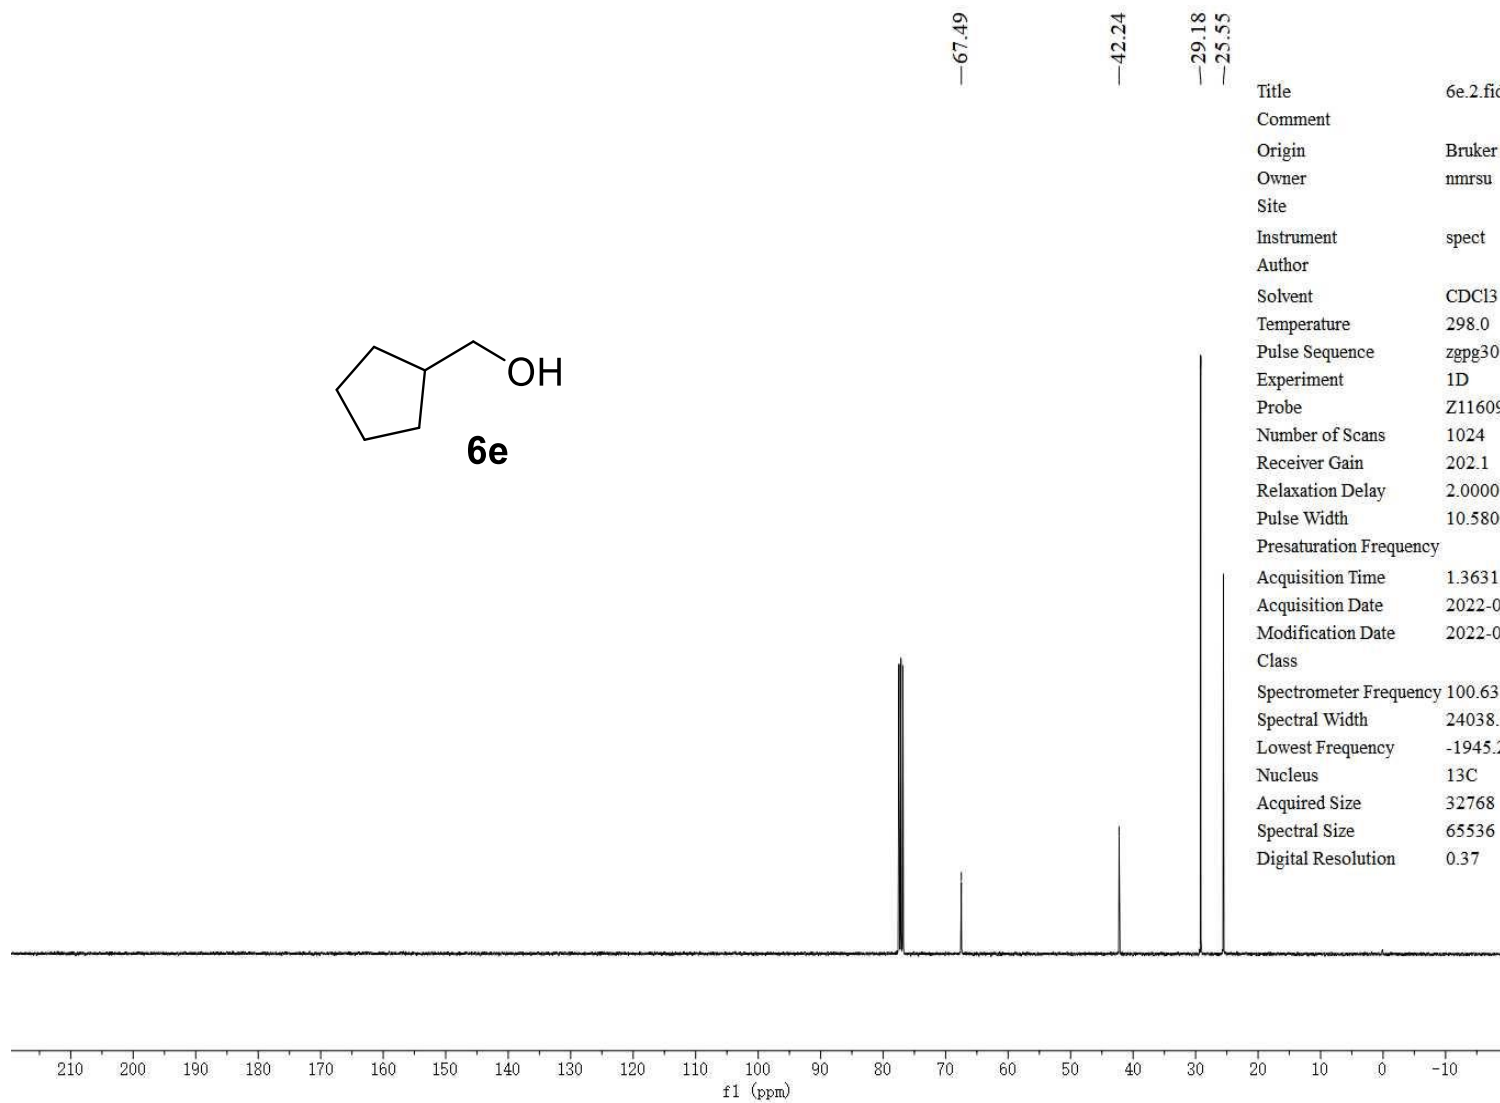

|                         |                                             |
|-------------------------|---------------------------------------------|
| Title                   | 6e.2.fid                                    |
| Comment                 |                                             |
| Origin                  | Bruker BioSpin GmbH                         |
| Owner                   | nmrsu                                       |
| Site                    |                                             |
| Instrument              | spect                                       |
| Author                  |                                             |
| Solvent                 | CDCl3                                       |
| Temperature             | 298.0                                       |
| Pulse Sequence          | zgpg30                                      |
| Experiment              | 1D                                          |
| Probe                   | Z116098_0436 (PA BBO 400S1 BBF-H-D-05 Z SP) |
| Number of Scans         | 1024                                        |
| Receiver Gain           | 202.1                                       |
| Relaxation Delay        | 2.0000                                      |
| Pulse Width             | 10.5800                                     |
| Presaturation Frequency |                                             |
| Acquisition Time        | 1.3631                                      |
| Acquisition Date        | 2022-03-18T04:25:38                         |
| Modification Date       | 2022-03-18T04:25:38                         |
| Class                   |                                             |
| Spectrometer Frequency  | 100.63                                      |
| Spectral Width          | 24038.5                                     |
| Lowest Frequency        | -1945.2                                     |
| Nucleus                 | 13C                                         |
| Acquired Size           | 32768                                       |
| Spectral Size           | 65536                                       |
| Digital Resolution      | 0.37                                        |

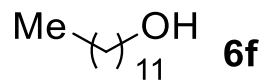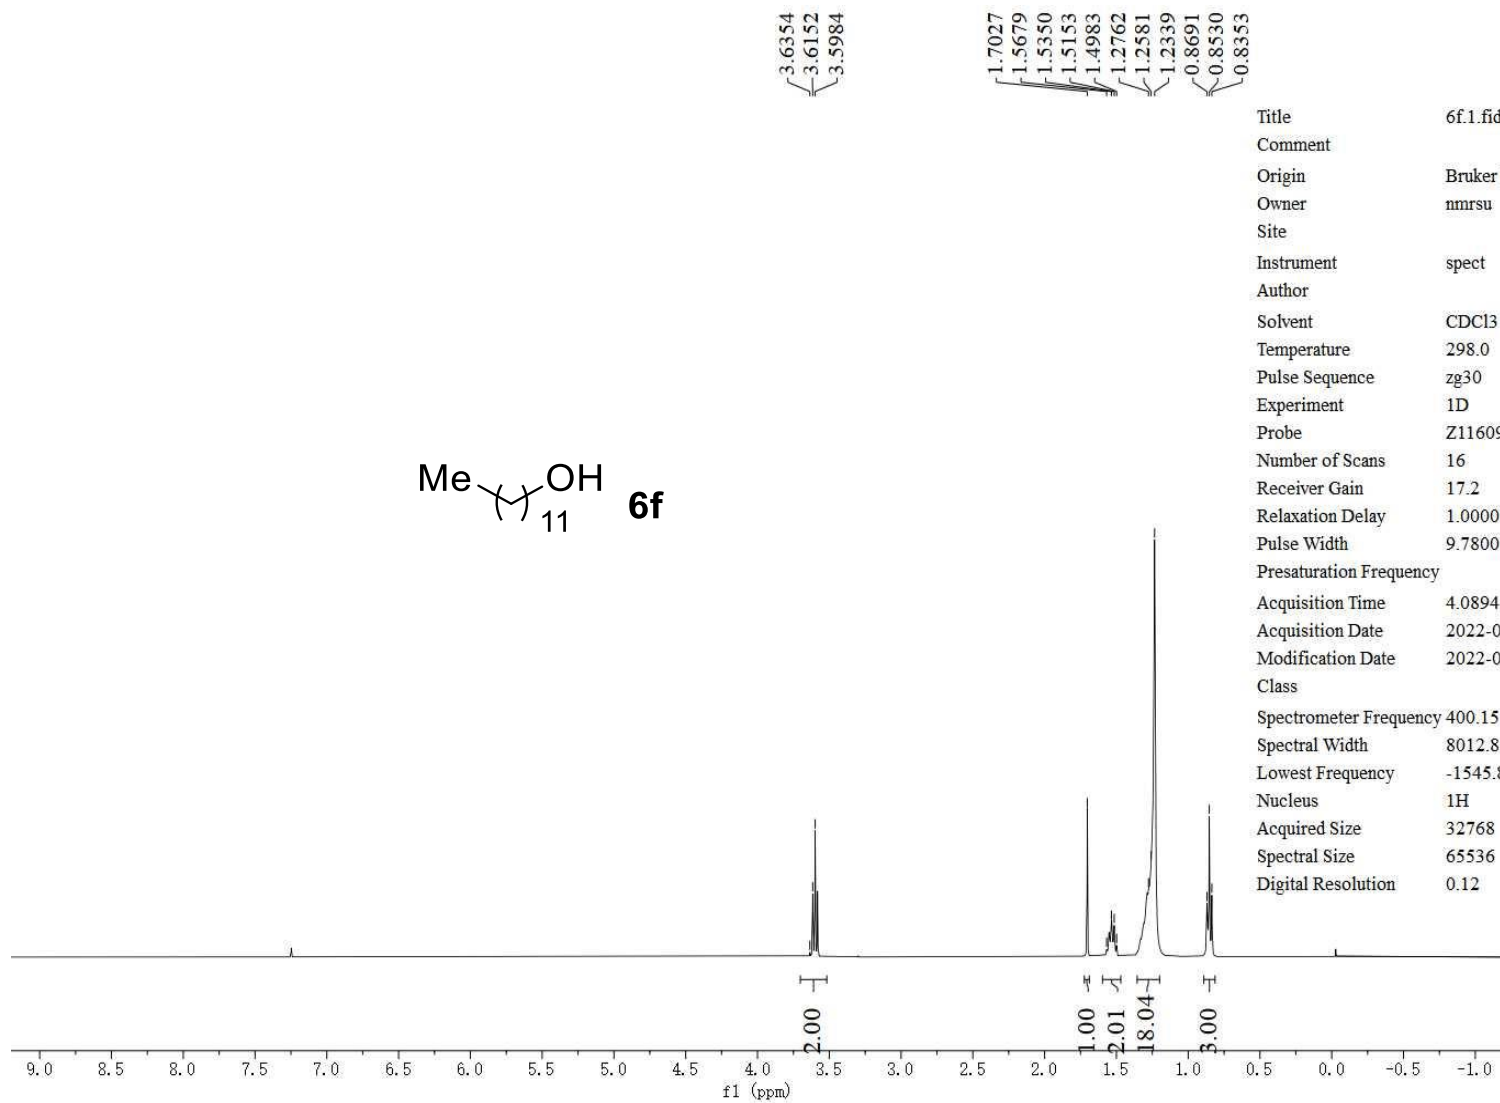

|                         |                                             |
|-------------------------|---------------------------------------------|
| Title                   | 6f.1.fid                                    |
| Comment                 |                                             |
| Origin                  | Bruker BioSpin GmbH                         |
| Owner                   | nmrsu                                       |
| Site                    |                                             |
| Instrument              | spect                                       |
| Author                  |                                             |
| Solvent                 | CDCl3                                       |
| Temperature             | 298.0                                       |
| Pulse Sequence          | zg30                                        |
| Experiment              | 1D                                          |
| Probe                   | Z116098_0436 (PA BBO 400S1 BBF-H-D-05 Z SP) |
| Number of Scans         | 16                                          |
| Receiver Gain           | 17.2                                        |
| Relaxation Delay        | 1.0000                                      |
| Pulse Width             | 9.7800                                      |
| Presaturation Frequency |                                             |
| Acquisition Time        | 4.0894                                      |
| Acquisition Date        | 2022-03-17T11:56:31                         |
| Modification Date       | 2022-03-17T11:56:30                         |
| Class                   |                                             |
| Spectrometer Frequency  | 400.15                                      |
| Spectral Width          | 8012.8                                      |
| Lowest Frequency        | -1545.8                                     |
| Nucleus                 | 1H                                          |
| Acquired Size           | 32768                                       |
| Spectral Size           | 65536                                       |
| Digital Resolution      | 0.12                                        |



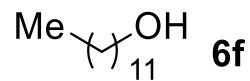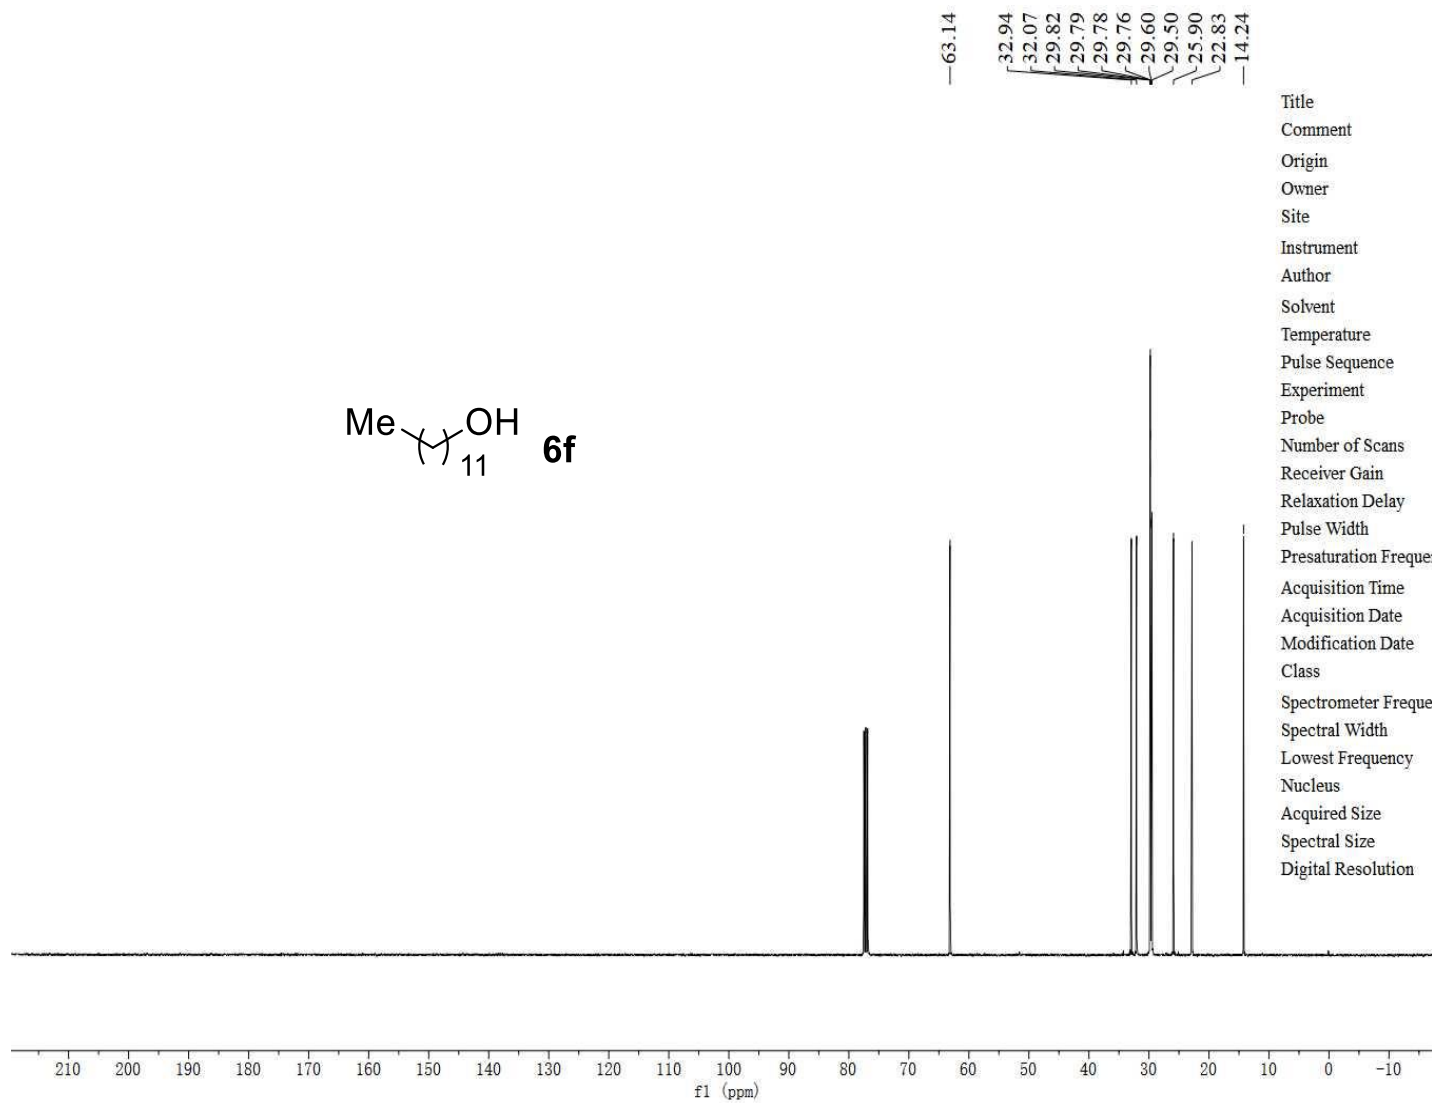

|                         |                                             |
|-------------------------|---------------------------------------------|
| Title                   | 6f.2.fid                                    |
| Comment                 |                                             |
| Origin                  | Bruker BioSpin GmbH                         |
| Owner                   | nmrsu                                       |
| Site                    |                                             |
| Instrument              | spect                                       |
| Author                  |                                             |
| Solvent                 | CDCl3                                       |
| Temperature             | 298.0                                       |
| Pulse Sequence          | zgpg30                                      |
| Experiment              | 1D                                          |
| Probe                   | Z116098_0436 (PA BBO 400S1 BBF-H-D-05 Z SP) |
| Number of Scans         | 1024                                        |
| Receiver Gain           | 202.1                                       |
| Relaxation Delay        | 2.0000                                      |
| Pulse Width             | 10.5800                                     |
| Presaturation Frequency |                                             |
| Acquisition Time        | 1.3631                                      |
| Acquisition Date        | 2022-03-17T21:38:27                         |
| Modification Date       | 2022-03-17T21:38:26                         |
| Class                   |                                             |
| Spectrometer Frequency  | 100.63                                      |
| Spectral Width          | 24038.5                                     |
| Lowest Frequency        | -1944.9                                     |
| Nucleus                 | 13C                                         |
| Acquired Size           | 32768                                       |
| Spectral Size           | 65536                                       |
| Digital Resolution      | 0.37                                        |

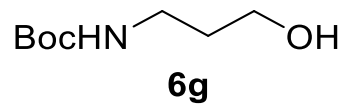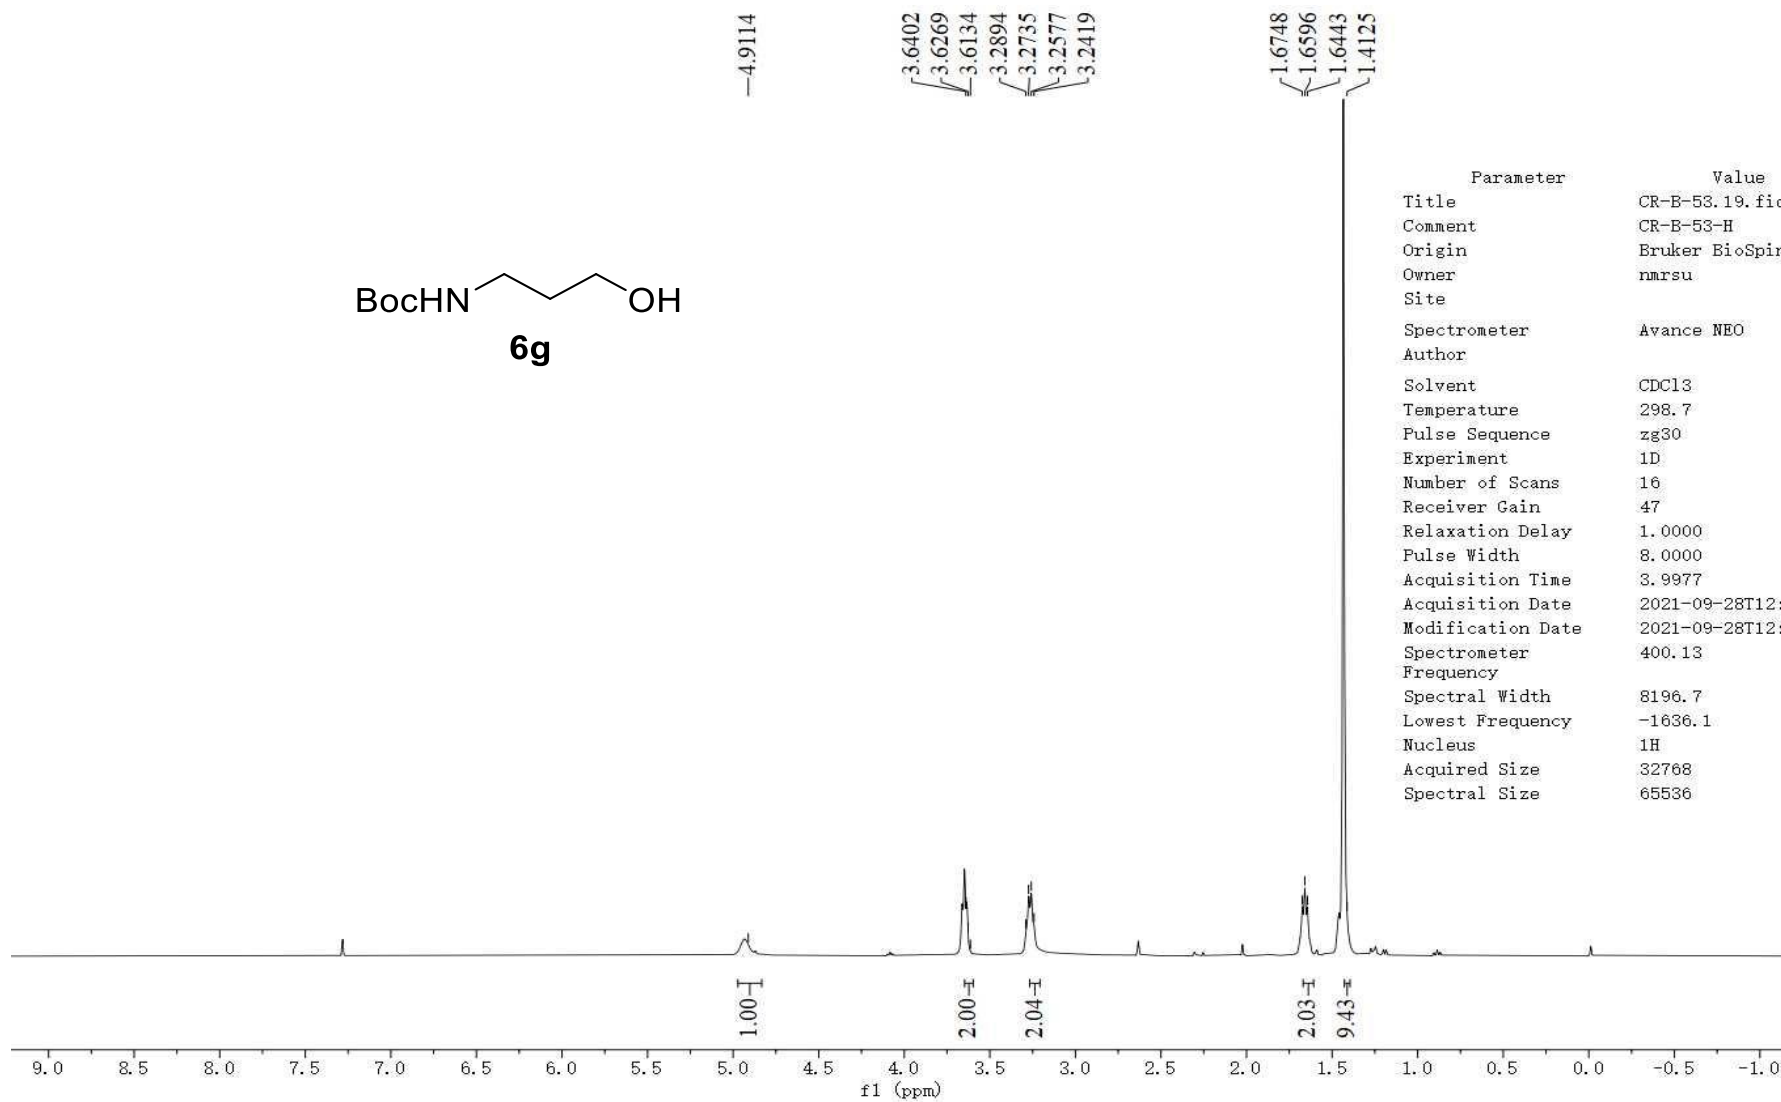

4.9114

3.6402  
3.6269  
3.6134  
3.2894  
3.2735  
3.2577  
3.2419

1.6748  
1.6596  
1.6443  
1.4125

| Parameter         | Value               |
|-------------------|---------------------|
| Title             | CR-B-53.19.fid      |
| Comment           | CR-B-53-H           |
| Origin            | Bruker BioSpin GmbH |
| Owner             | nmrsu               |
| Site              |                     |
| Spectrometer      | Avance NEO          |
| Author            |                     |
| Solvent           | CDCl <sub>3</sub>   |
| Temperature       | 298.7               |
| Pulse Sequence    | zg30                |
| Experiment        | 1D                  |
| Number of Scans   | 16                  |
| Receiver Gain     | 47                  |
| Relaxation Delay  | 1.0000              |
| Pulse Width       | 8.0000              |
| Acquisition Time  | 3.9977              |
| Acquisition Date  | 2021-09-28T12:21:36 |
| Modification Date | 2021-09-28T12:21:56 |
| Spectrometer      | 400.13              |
| Frequency         |                     |
| Spectral Width    | 8196.7              |
| Lowest Frequency  | -1636.1             |
| Nucleus           | <sup>1</sup> H      |
| Acquired Size     | 32768               |
| Spectral Size     | 65536               |

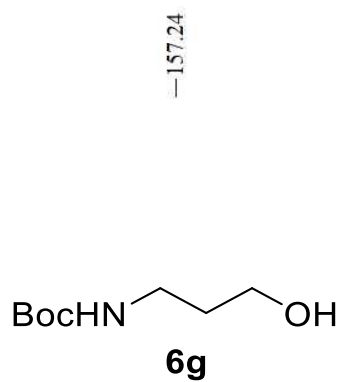

-157.24

-79.64

-59.34

~37.05  
 ~32.90  
 ~28.46

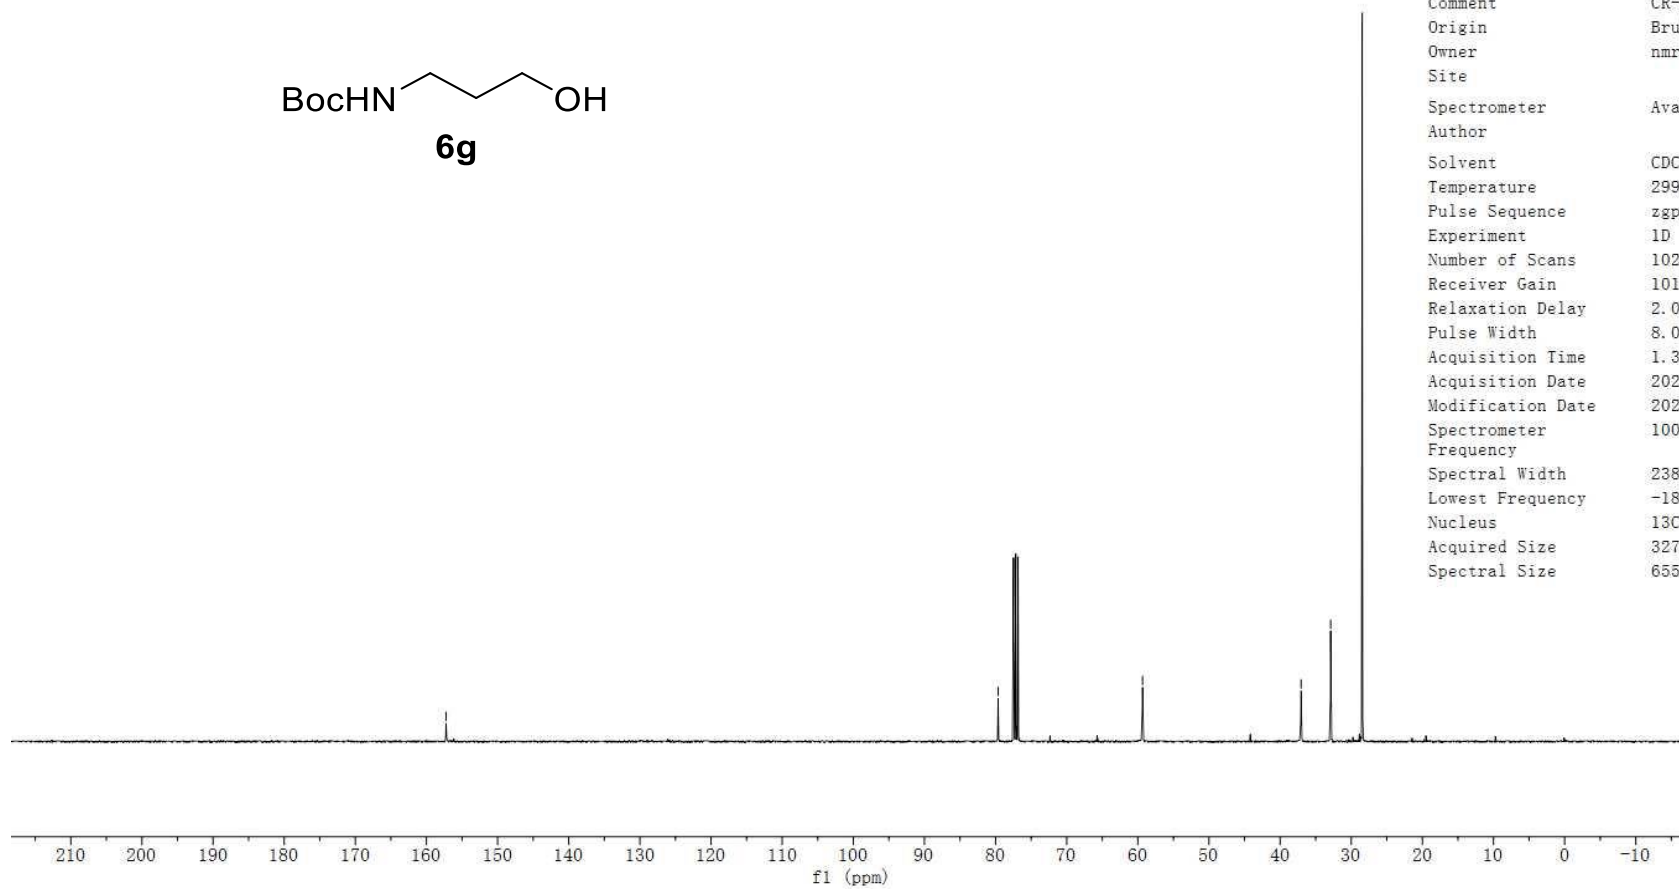

| Parameter         | Value               |
|-------------------|---------------------|
| Title             | CR-B-53.20.fid      |
| Comment           | CR-B-53-C           |
| Origin            | Bruker BioSpin GmbH |
| Owner             | nmrsu               |
| Site              |                     |
| Spectrometer      | Avance NEO          |
| Author            |                     |
| Solvent           | CDCl3               |
| Temperature       | 299.4               |
| Pulse Sequence    | zgpg30              |
| Experiment        | 1D                  |
| Number of Scans   | 1024                |
| Receiver Gain     | 101                 |
| Relaxation Delay  | 2.0000              |
| Pulse Width       | 8.0000              |
| Acquisition Time  | 1.3763              |
| Acquisition Date  | 2021-09-28T13:20:57 |
| Modification Date | 2021-09-28T13:21:16 |
| Spectrometer      | 100.62              |
| Frequency         |                     |
| Spectral Width    | 23809.5             |
| Lowest Frequency  | -1832.8             |
| Nucleus           | 13C                 |
| Acquired Size     | 32768               |
| Spectral Size     | 65536               |

7.4547  
7.3948  
7.3861

3.6979  
3.6818  
3.6658

2.8001  
2.7812  
2.7610

1.9359  
1.9200  
1.9044  
1.8809

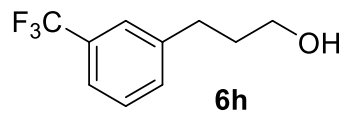

|                         |                                             |
|-------------------------|---------------------------------------------|
| Title                   | 6h.1.fid                                    |
| Comment                 |                                             |
| Origin                  | Bruker BioSpin GmbH                         |
| Owner                   | nmrsu                                       |
| Site                    |                                             |
| Instrument              | spect                                       |
| Author                  |                                             |
| Solvent                 | CDC13                                       |
| Temperature             | 298.0                                       |
| Pulse Sequence          | zg30                                        |
| Experiment              | 1D                                          |
| Probe                   | Z116098_0436 (PA BBO 400S1 BBF-H-D-05 Z SP) |
| Number of Scans         | 16                                          |
| Receiver Gain           | 13.8                                        |
| Relaxation Delay        | 1.0000                                      |
| Pulse Width             | 9.7800                                      |
| Presaturation Frequency |                                             |
| Acquisition Time        | 4.0894                                      |
| Acquisition Date        | 2022-03-17T12:01:51                         |
| Modification Date       | 2022-03-17T12:01:50                         |
| Class                   |                                             |
| Spectrometer Frequency  | 400.15                                      |
| Spectral Width          | 8012.8                                      |
| Lowest Frequency        | -1545.1                                     |
| Nucleus                 | 1H                                          |
| Acquired Size           | 32768                                       |
| Spectral Size           | 65536                                       |
| Digital Resolution      | 0.12                                        |

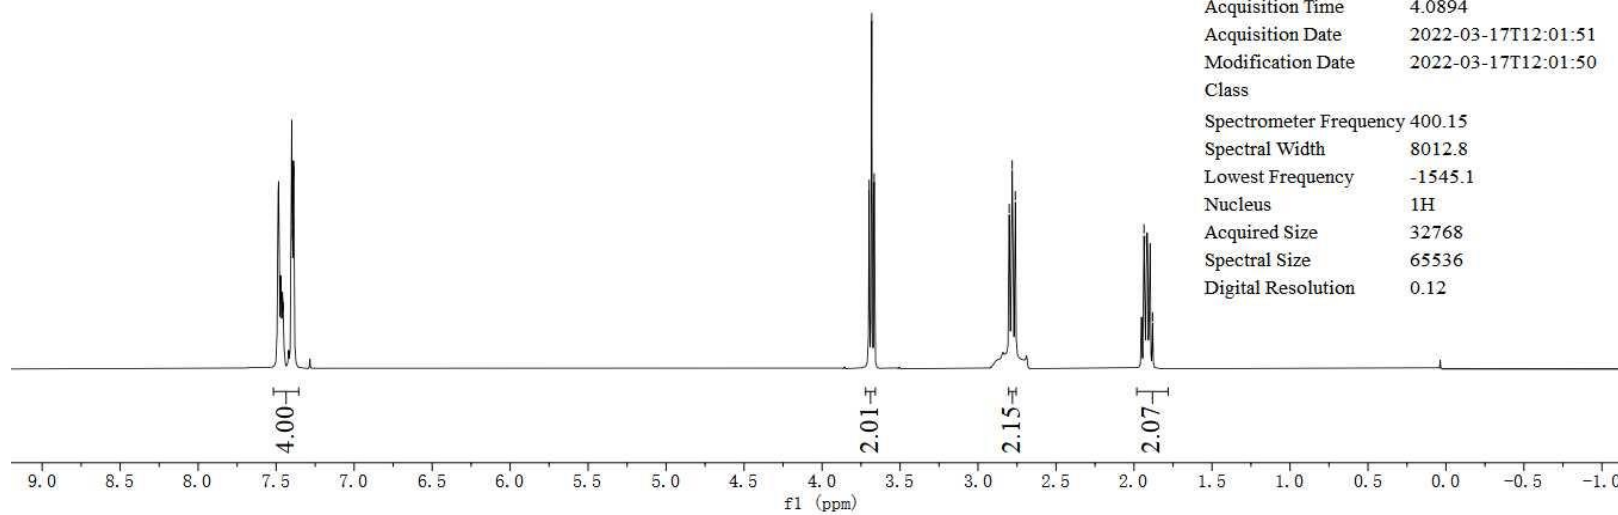

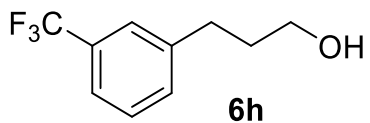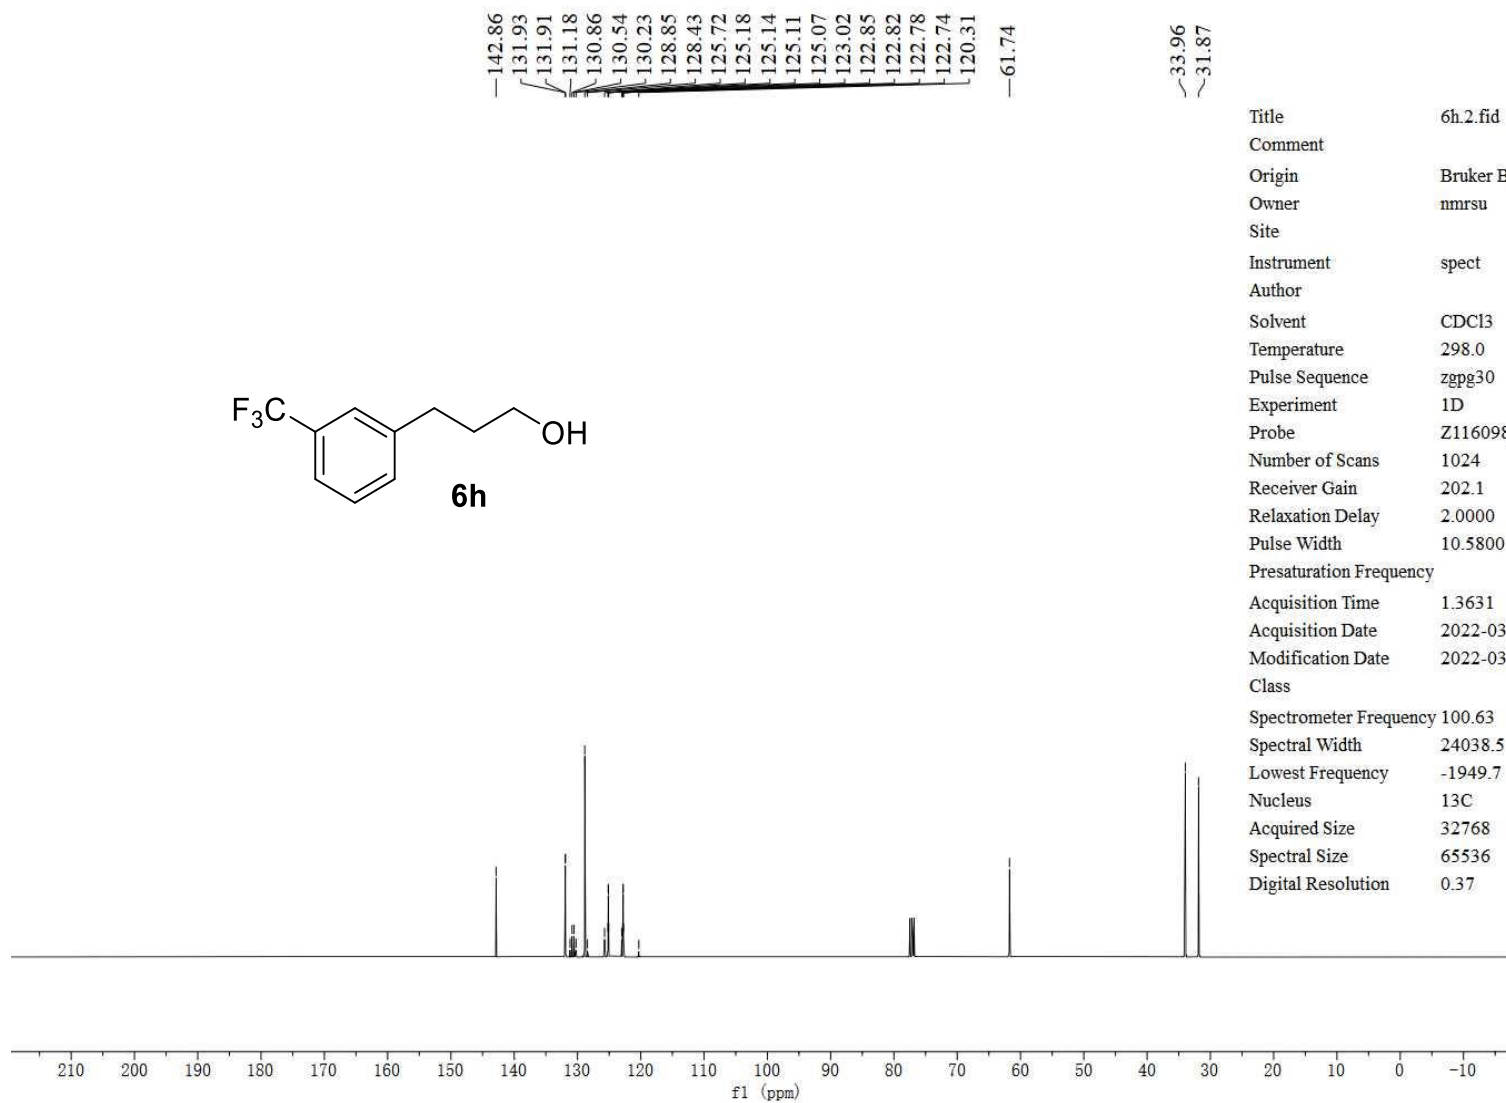

|                         |                                             |
|-------------------------|---------------------------------------------|
| Title                   | 6h.2.fid                                    |
| Comment                 |                                             |
| Origin                  | Bruker BioSpin GmbH                         |
| Owner                   | nmrsu                                       |
| Site                    |                                             |
| Instrument              | spect                                       |
| Author                  |                                             |
| Solvent                 | CDCl3                                       |
| Temperature             | 298.0                                       |
| Pulse Sequence          | zgpg30                                      |
| Experiment              | 1D                                          |
| Probe                   | Z116098_0436 (PA BBO 400S1 BBF-H-D-05 Z SP) |
| Number of Scans         | 1024                                        |
| Receiver Gain           | 202.1                                       |
| Relaxation Delay        | 2.0000                                      |
| Pulse Width             | 10.5800                                     |
| Presaturation Frequency |                                             |
| Acquisition Time        | 1.3631                                      |
| Acquisition Date        | 2022-03-17T22:59:55                         |
| Modification Date       | 2022-03-17T22:59:54                         |
| Class                   |                                             |
| Spectrometer Frequency  | 100.63                                      |
| Spectral Width          | 24038.5                                     |
| Lowest Frequency        | -1949.7                                     |
| Nucleus                 | 13C                                         |
| Acquired Size           | 32768                                       |
| Spectral Size           | 65536                                       |
| Digital Resolution      | 0.37                                        |

8.0744  
8.0540  
7.8856  
7.8661  
7.7766  
7.7566  
7.5552  
7.5174  
7.4802  
7.4476  
7.3940  
7.3766

4.0116  
3.9950  
3.9783  
3.3763  
3.3597  
3.3429

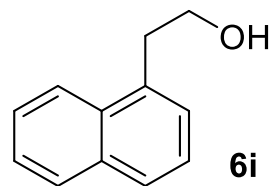

| Parameter         | Value               |
|-------------------|---------------------|
| Title             | CR-B-87.11.fid      |
| Comment           | CR-B-87-H           |
| Origin            | Bruker BioSpin GmbH |
| Owner             | nmrsu               |
| Site              |                     |
| Spectrometer      | Avance NEO          |
| Author            |                     |
| Solvent           | CDCl3               |
| Temperature       | 296.7               |
| Pulse Sequence    | zg30                |
| Experiment        | 1D                  |
| Number of Scans   | 16                  |
| Receiver Gain     | 101                 |
| Relaxation Delay  | 1.0000              |
| Pulse Width       | 8.0000              |
| Acquisition Time  | 3.9977              |
| Acquisition Date  | 2021-10-18T09:44:04 |
| Modification Date | 2021-10-18T09:43:24 |
| Spectrometer      | 400.13              |
| Frequency         |                     |
| Spectral Width    | 8196.7              |
| Lowest Frequency  | -1636.2             |
| Nucleus           | 1H                  |
| Acquired Size     | 32768               |
| Spectral Size     | 65536               |

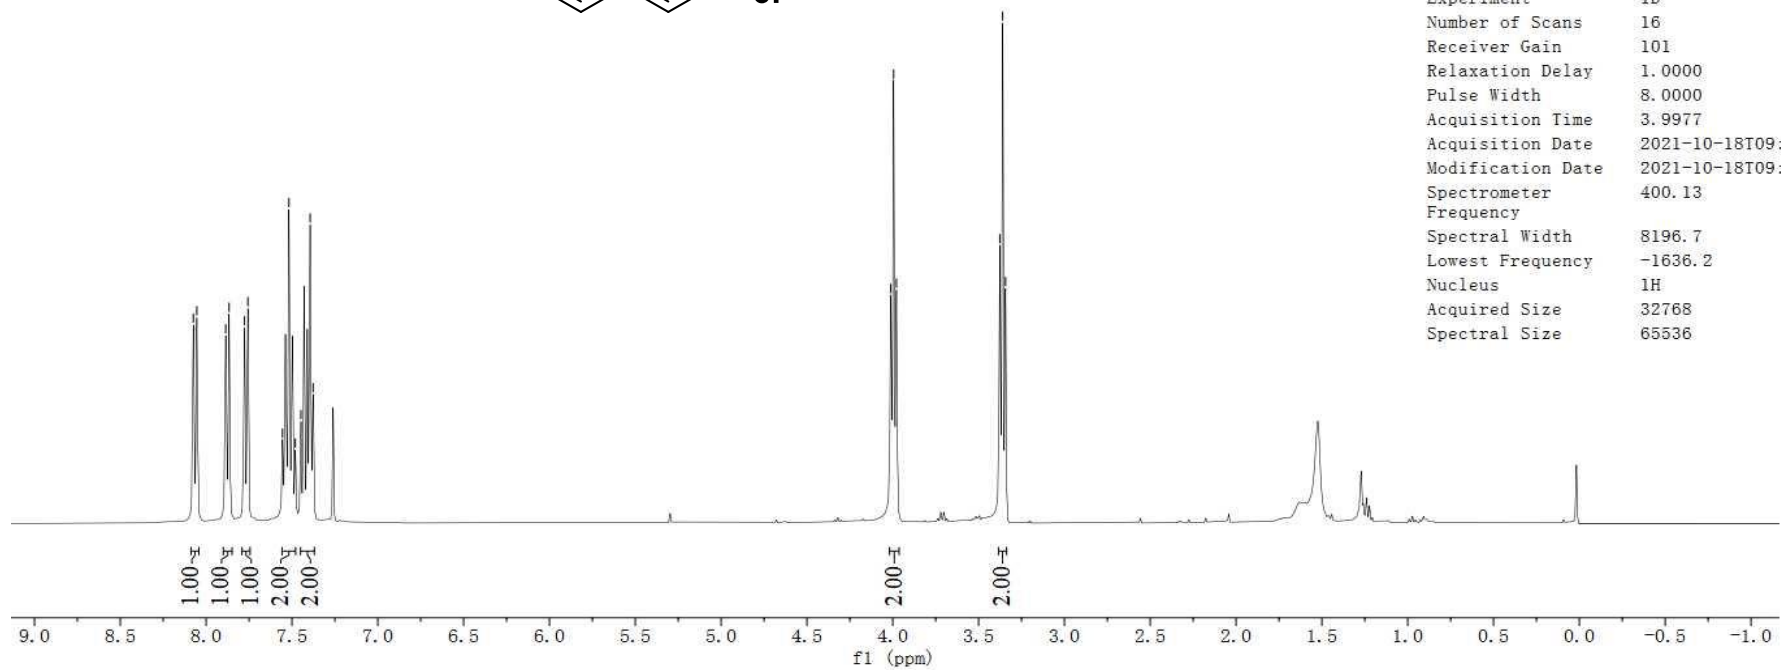

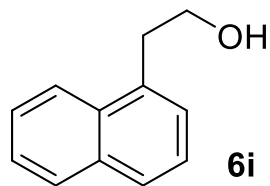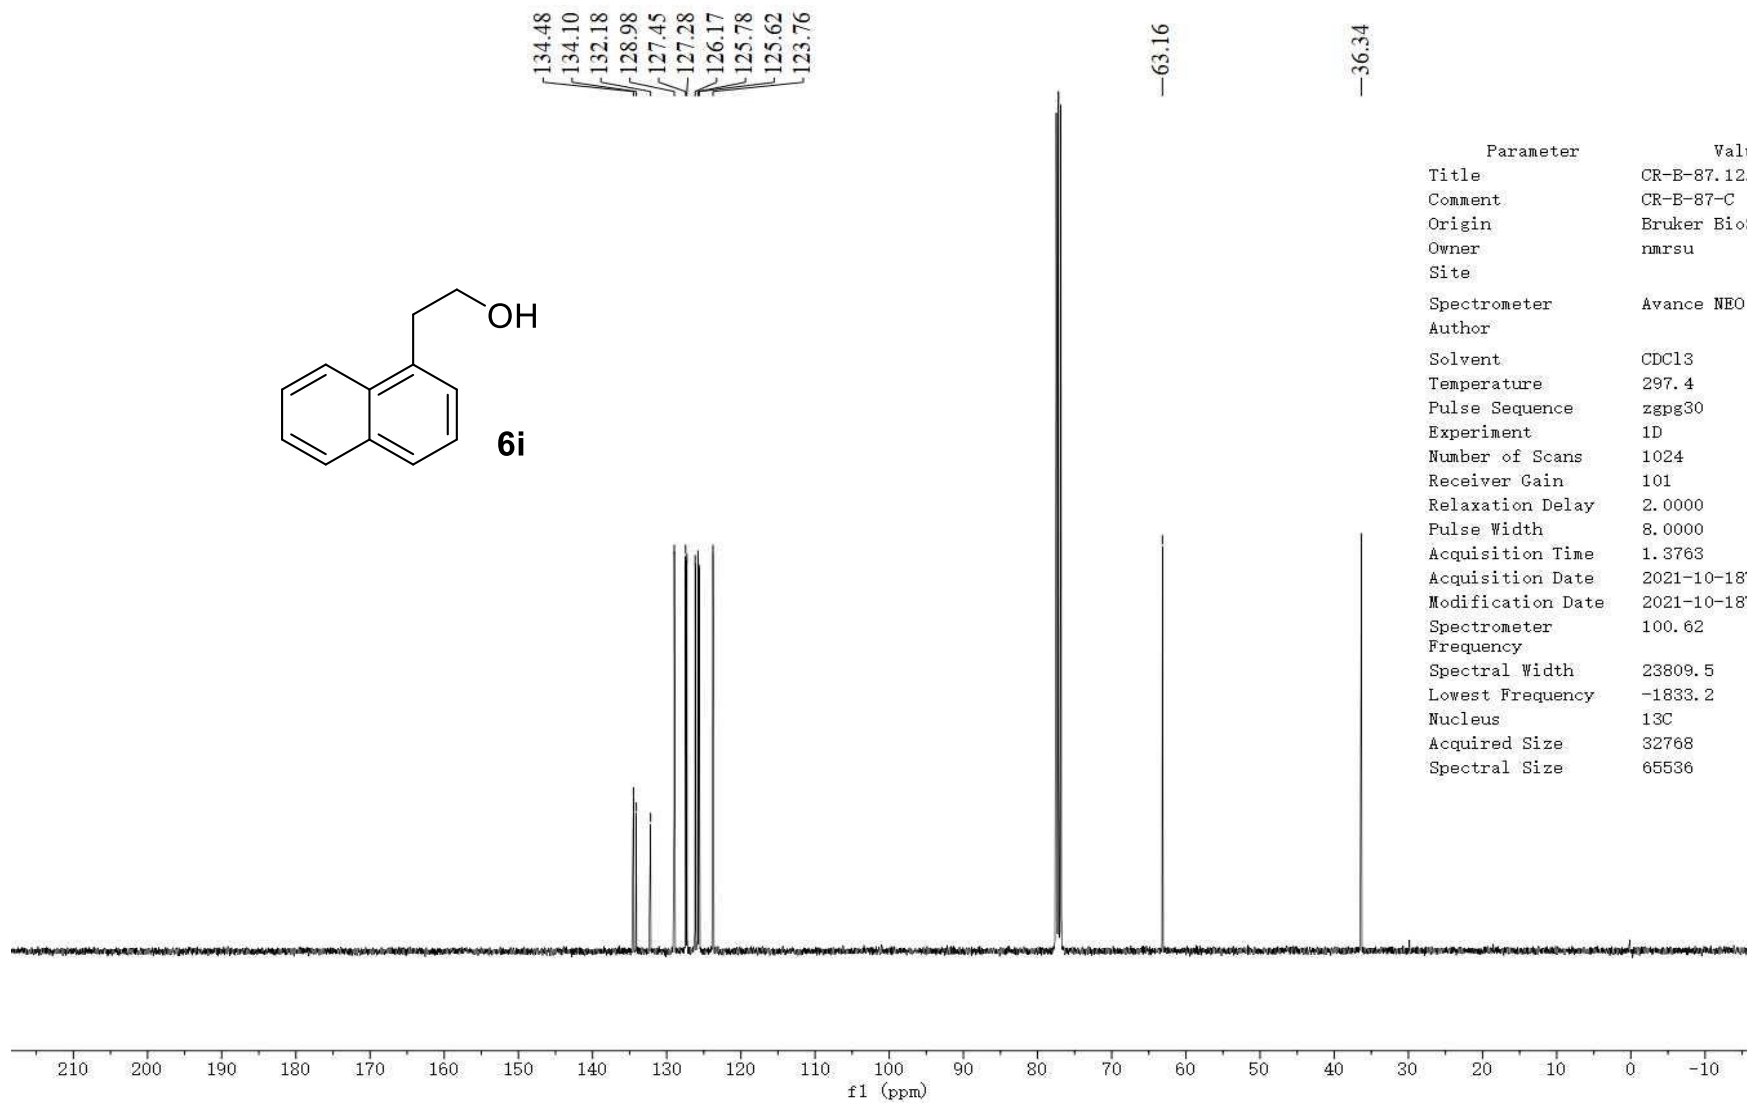

| Parameter         | Value               |
|-------------------|---------------------|
| Title             | CR-B-87.12.fid      |
| Comment           | CR-B-87-C           |
| Origin            | Bruker BioSpin GmbH |
| Owner             | nmrsu               |
| Site              |                     |
| Spectrometer      | Avance NEO          |
| Author            |                     |
| Solvent           | CDCl3               |
| Temperature       | 297.4               |
| Pulse Sequence    | zgpg30              |
| Experiment        | 1D                  |
| Number of Scans   | 1024                |
| Receiver Gain     | 101                 |
| Relaxation Delay  | 2.0000              |
| Pulse Width       | 8.0000              |
| Acquisition Time  | 1.3763              |
| Acquisition Date  | 2021-10-18T10:43:15 |
| Modification Date | 2021-10-18T10:42:36 |
| Spectrometer      | 100.62              |
| Frequency         |                     |
| Spectral Width    | 23809.5             |
| Lowest Frequency  | -1833.2             |
| Nucleus           | 13C                 |
| Acquired Size     | 32768               |
| Spectral Size     | 65536               |

3.6235  
 3.6127  
 3.6009  
 3.5899  
 1.9156  
 1.9038  
 1.8948  
 1.8816  
 1.8678  
 1.7716  
 1.7637  
 1.7542  
 1.7416  
 1.7304  
 1.7197  
 1.6950  
 1.5735  
 1.5622  
 1.5456  
 1.5339  
 1.5240  
 1.5070  
 1.4869  
 1.4684  
 1.4496  
 1.3117  
 1.3045  
 1.2838  
 1.2737  
 1.2625  
 1.2517  
 1.2429  
 1.2285  
 1.2125  
 1.1836  
 1.1783  
 1.1648  
 1.1521  
 1.1436

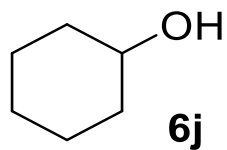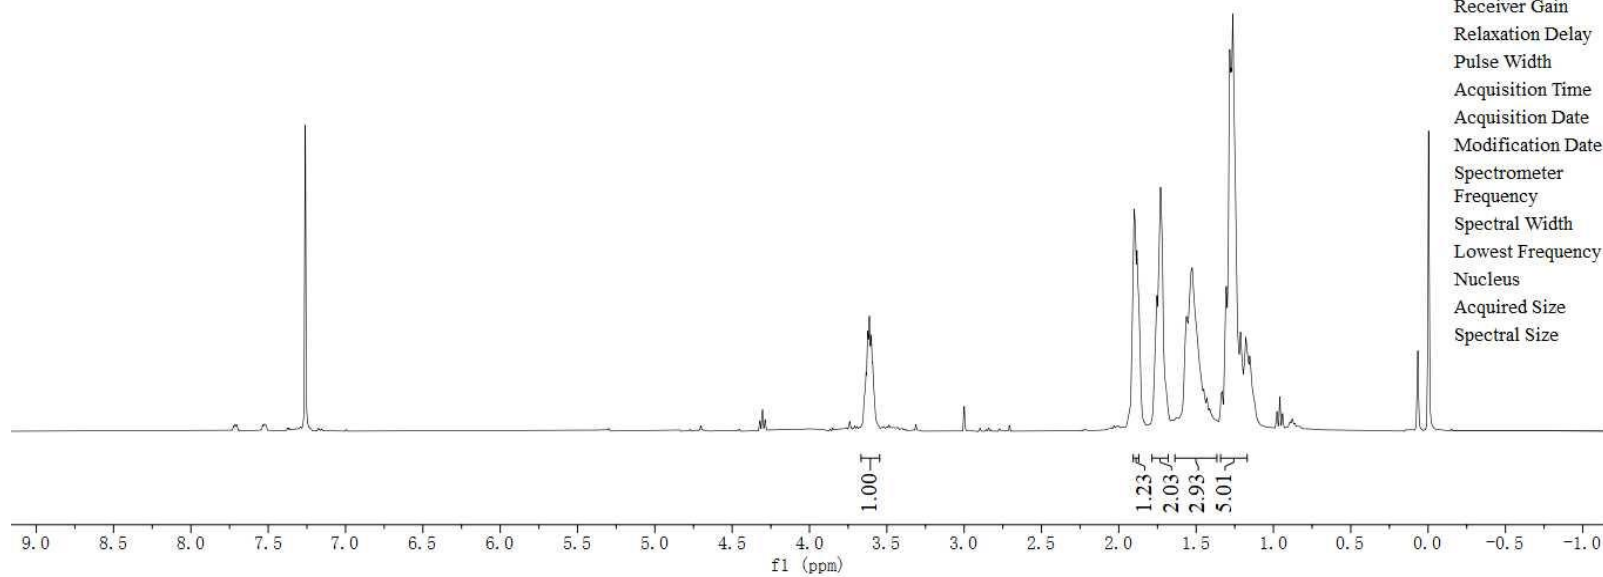

|                   |                     |
|-------------------|---------------------|
| Title             | CR-B-12.29.fid      |
| Comment           | CR-B-12-H           |
| Origin            | Bruker BioSpin GmbH |
| Owner             | nmrsu               |
| Site              |                     |
| Spectrometer      | Avance NEO          |
| Author            |                     |
| Solvent           | CDCl3               |
| Temperature       | 298.8               |
| Pulse Sequence    | zg30                |
| Experiment        | 1D                  |
| Number of Scans   | 16                  |
| Receiver Gain     | 101                 |
| Relaxation Delay  | 1.0000              |
| Pulse Width       | 8.0000              |
| Acquisition Time  | 3.9977              |
| Acquisition Date  | 2021-09-28T18:01:26 |
| Modification Date | 2021-09-28T18:01:46 |
| Spectrometer      | 400.13              |
| Frequency         |                     |
| Spectral Width    | 8196.7              |
| Lowest Frequency  | -1636.3             |
| Nucleus           | 1H                  |
| Acquired Size     | 32768               |
| Spectral Size     | 65536               |



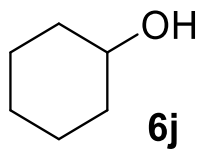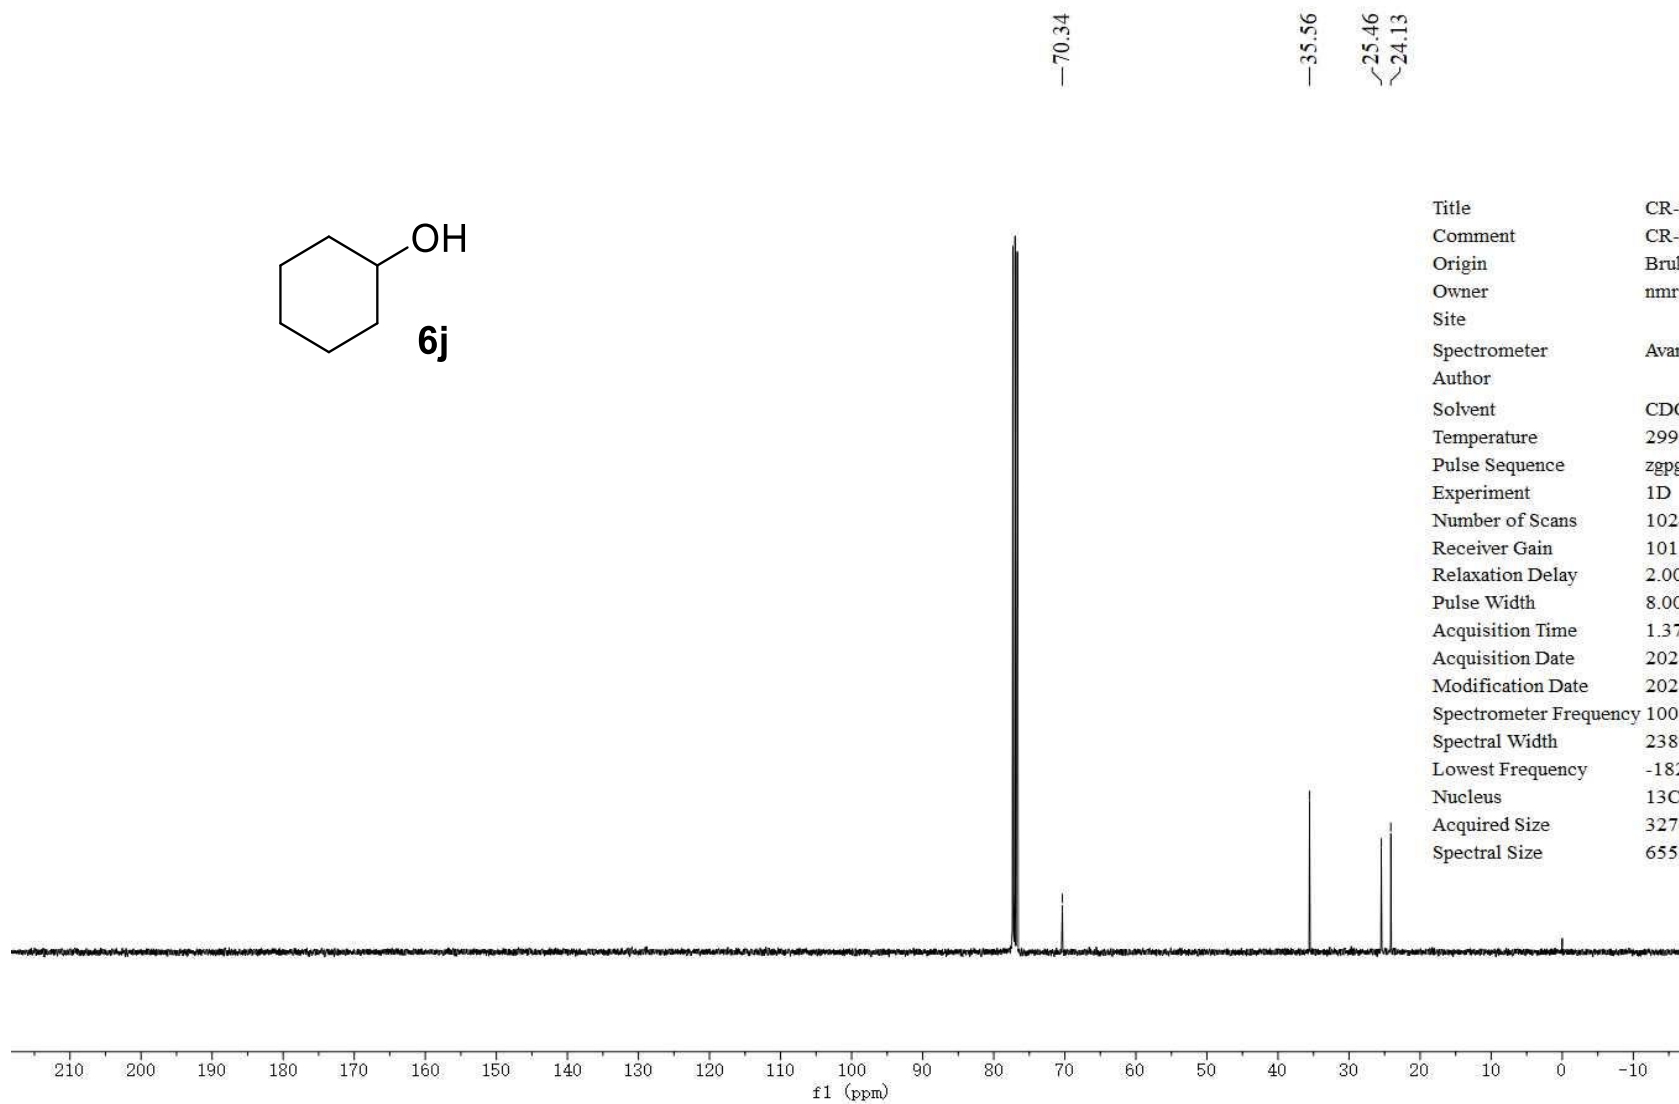

|                        |                     |
|------------------------|---------------------|
| Title                  | CR-B-12.30.fid      |
| Comment                | CR-B-12-C           |
| Origin                 | Bruker BioSpin GmbH |
| Owner                  | nmrsu               |
| Site                   |                     |
| Spectrometer           | Avance NEO          |
| Author                 |                     |
| Solvent                | CDCl3               |
| Temperature            | 299.5               |
| Pulse Sequence         | zgpg30              |
| Experiment             | 1D                  |
| Number of Scans        | 1024                |
| Receiver Gain          | 101                 |
| Relaxation Delay       | 2.0000              |
| Pulse Width            | 8.0000              |
| Acquisition Time       | 1.3763              |
| Acquisition Date       | 2021-09-28T19:00:46 |
| Modification Date      | 2021-09-28T19:01:06 |
| Spectrometer Frequency | 100.62              |
| Spectral Width         | 23809.5             |
| Lowest Frequency       | -1828.9             |
| Nucleus                | 13C                 |
| Acquired Size          | 32768               |
| Spectral Size          | 65536               |

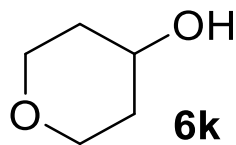

3.9739  
3.9630  
3.9518  
3.9447  
3.9335  
3.9225  
3.8787  
3.8680  
3.8561  
3.8446  
3.8333  
3.8213  
3.8105  
3.4636  
3.4588  
3.4539  
3.4342  
3.4287  
3.4089  
3.4039  
3.3991  
1.9093  
1.8780  
1.8689  
1.7441  
1.5978  
1.5874  
1.5739  
1.5637  
1.5520  
1.5403  
1.5302  
1.5167  
1.5062

| Parameter         | Value               |
|-------------------|---------------------|
| Title             | CR-B-59.11.fid      |
| Comment           | CR-B-59-H           |
| Origin            | Bruker BioSpin GmbH |
| Owner             | nmsu                |
| Site              |                     |
| Spectrometer      | Avance NEO          |
| Author            |                     |
| Solvent           | CDC13               |
| Temperature       | 298.8               |
| Pulse Sequence    | zg30                |
| Experiment        | 1D                  |
| Number of Scans   | 16                  |
| Receiver Gain     | 101                 |
| Relaxation Delay  | 1.0000              |
| Pulse Width       | 8.0000              |
| Acquisition Time  | 3.9977              |
| Acquisition Date  | 2021-09-27T20:28:47 |
| Modification Date | 2021-09-27T20:29:06 |
| Spectrometer      | 400.13              |
| Frequency         |                     |
| Spectral Width    | 8196.7              |
| Lowest Frequency  | -1636.2             |
| Nucleus           | 1H                  |
| Acquired Size     | 32768               |
| Spectral Size     | 65536               |

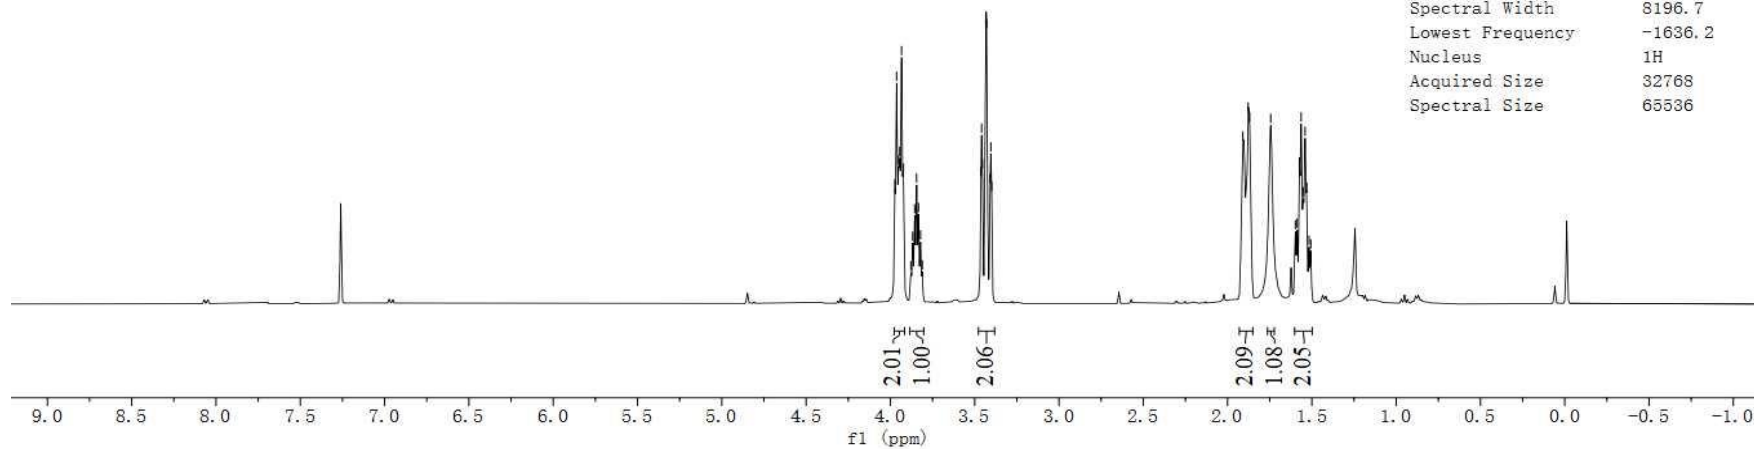

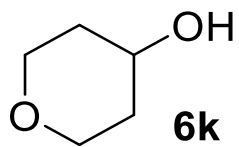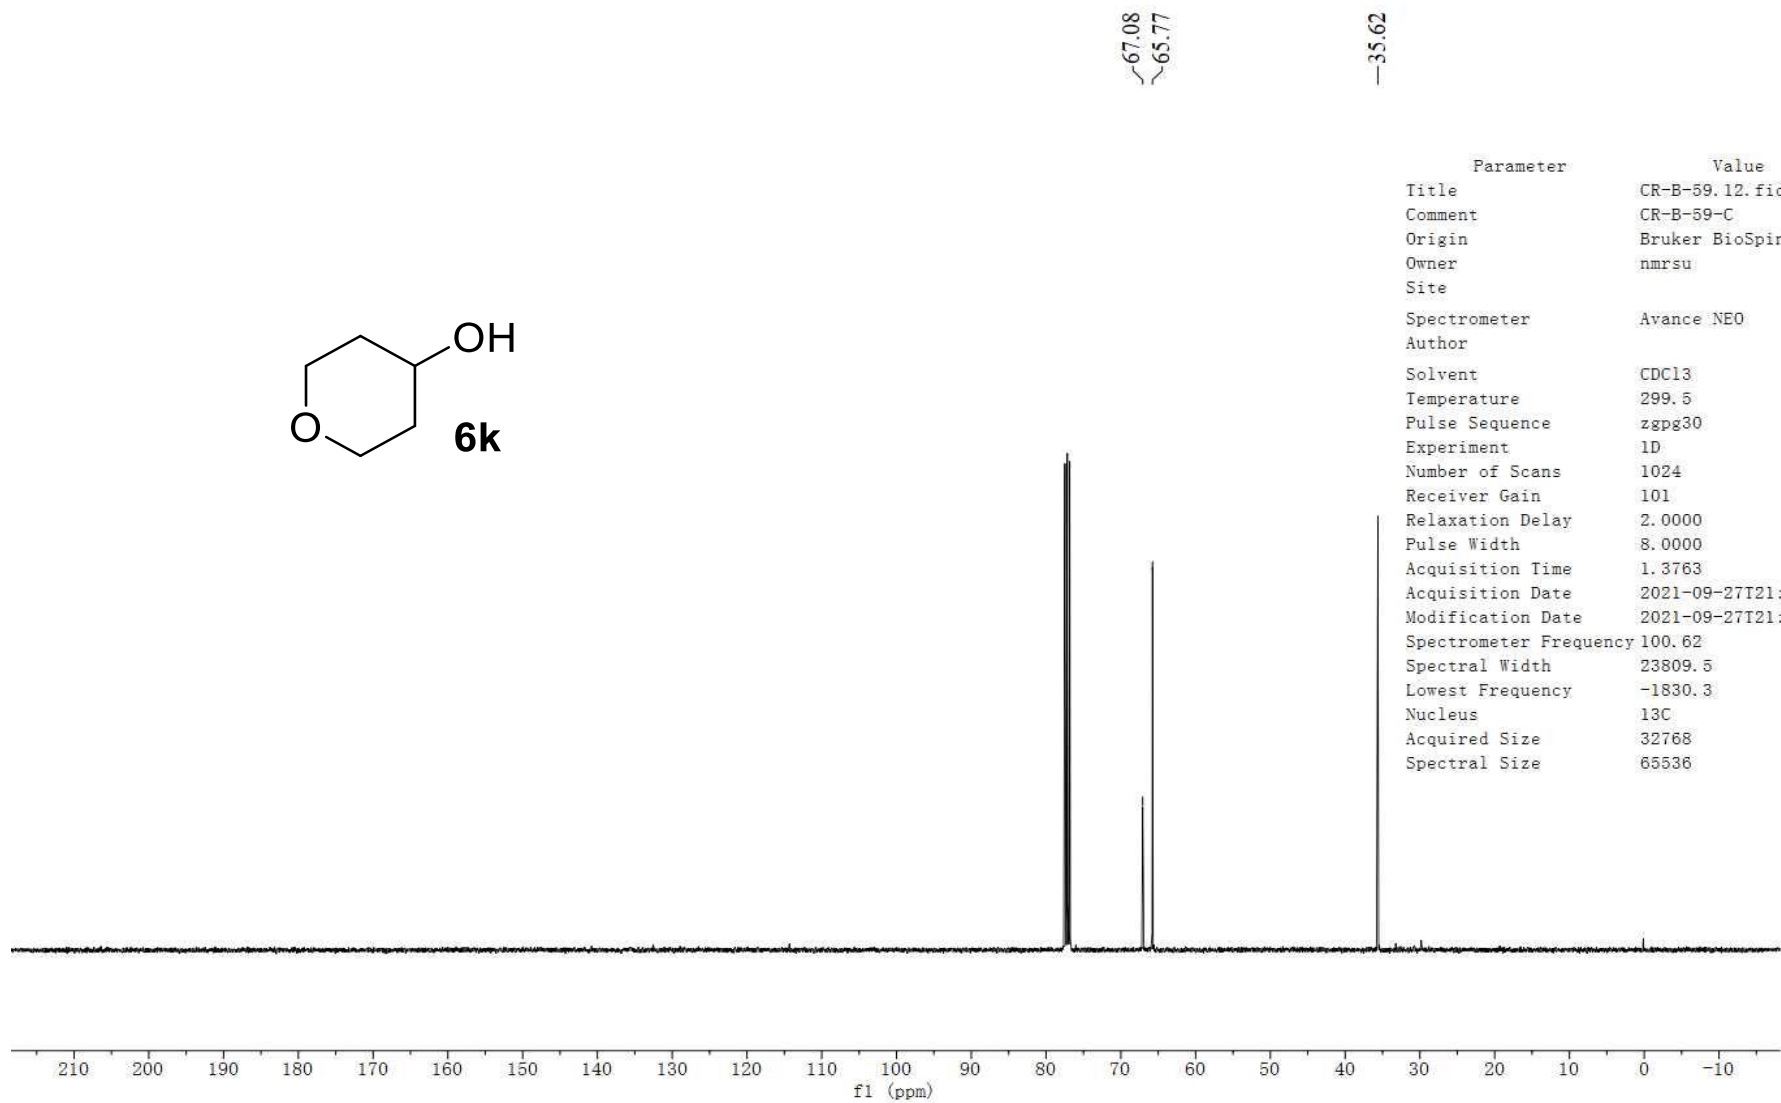

| Parameter              | Value               |
|------------------------|---------------------|
| Title                  | CR-B-59.12.fid      |
| Comment                | CR-B-59-C           |
| Origin                 | Bruker BioSpin GmbH |
| Owner                  | nmrsu               |
| Site                   |                     |
| Spectrometer           | Avance NEO          |
| Author                 |                     |
| Solvent                | CDCl3               |
| Temperature            | 299.5               |
| Pulse Sequence         | zgpg30              |
| Experiment             | 1D                  |
| Number of Scans        | 1024                |
| Receiver Gain          | 101                 |
| Relaxation Delay       | 2.0000              |
| Pulse Width            | 8.0000              |
| Acquisition Time       | 1.3763              |
| Acquisition Date       | 2021-09-27T21:28:27 |
| Modification Date      | 2021-09-27T21:28:46 |
| Spectrometer Frequency | 100.62              |
| Spectral Width         | 23809.5             |
| Lowest Frequency       | -1830.3             |
| Nucleus                | 13C                 |
| Acquired Size          | 32768               |
| Spectral Size          | 65536               |

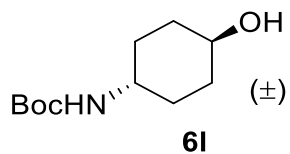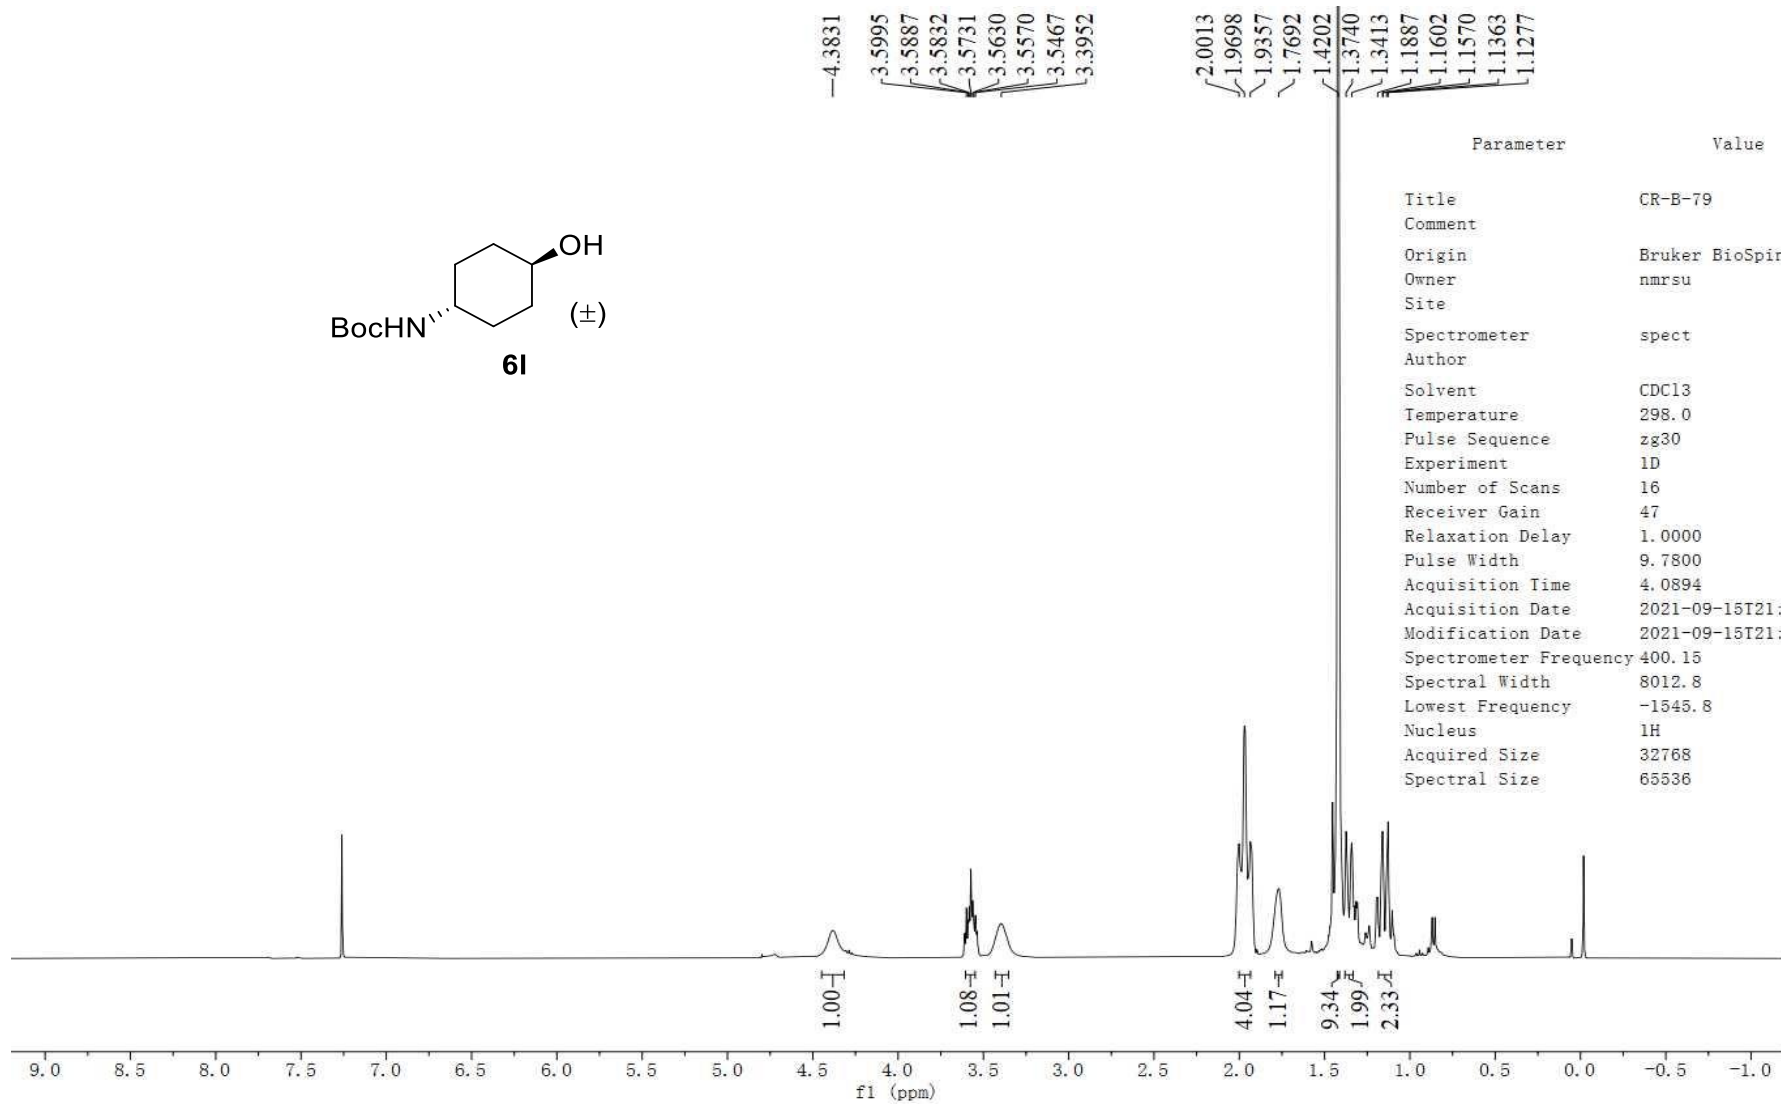

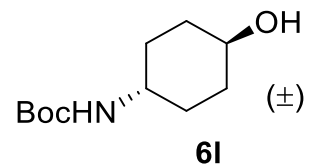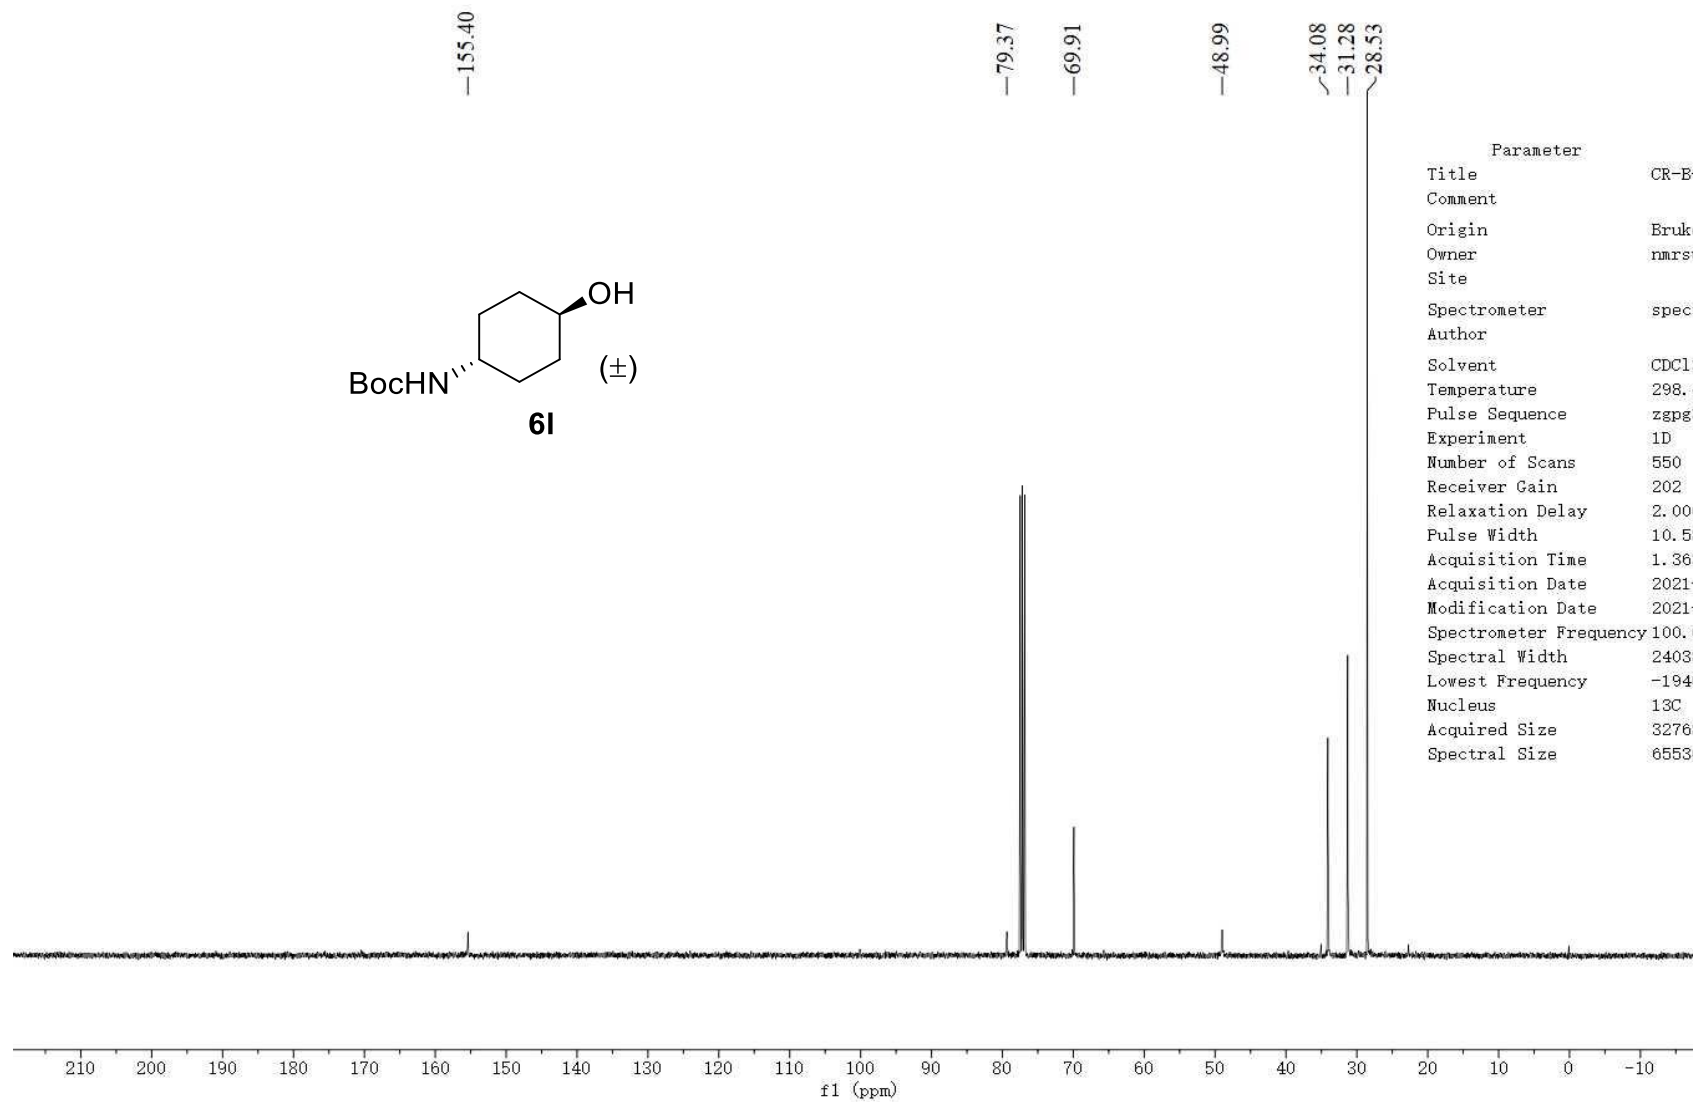

| Parameter              | Value               |
|------------------------|---------------------|
| Title                  | CR-B-79             |
| Comment                |                     |
| Origin                 | Bruker BioSpin GmbH |
| Owner                  | nmrsu               |
| Site                   |                     |
| Spectrometer           | spect               |
| Author                 |                     |
| Solvent                | CDC13               |
| Temperature            | 298.4               |
| Pulse Sequence         | zgpg30              |
| Experiment             | 1D                  |
| Number of Scans        | 550                 |
| Receiver Gain          | 202                 |
| Relaxation Delay       | 2.0000              |
| Pulse Width            | 10.5800             |
| Acquisition Time       | 1.3631              |
| Acquisition Date       | 2021-09-15T22:30:53 |
| Modification Date      | 2021-09-15T22:30:54 |
| Spectrometer Frequency | 100.62              |
| Spectral Width         | 24038.5             |
| Lowest Frequency       | -1946.2             |
| Nucleus                | 13C                 |
| Acquired Size          | 32768               |
| Spectral Size          | 65536               |

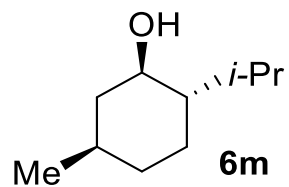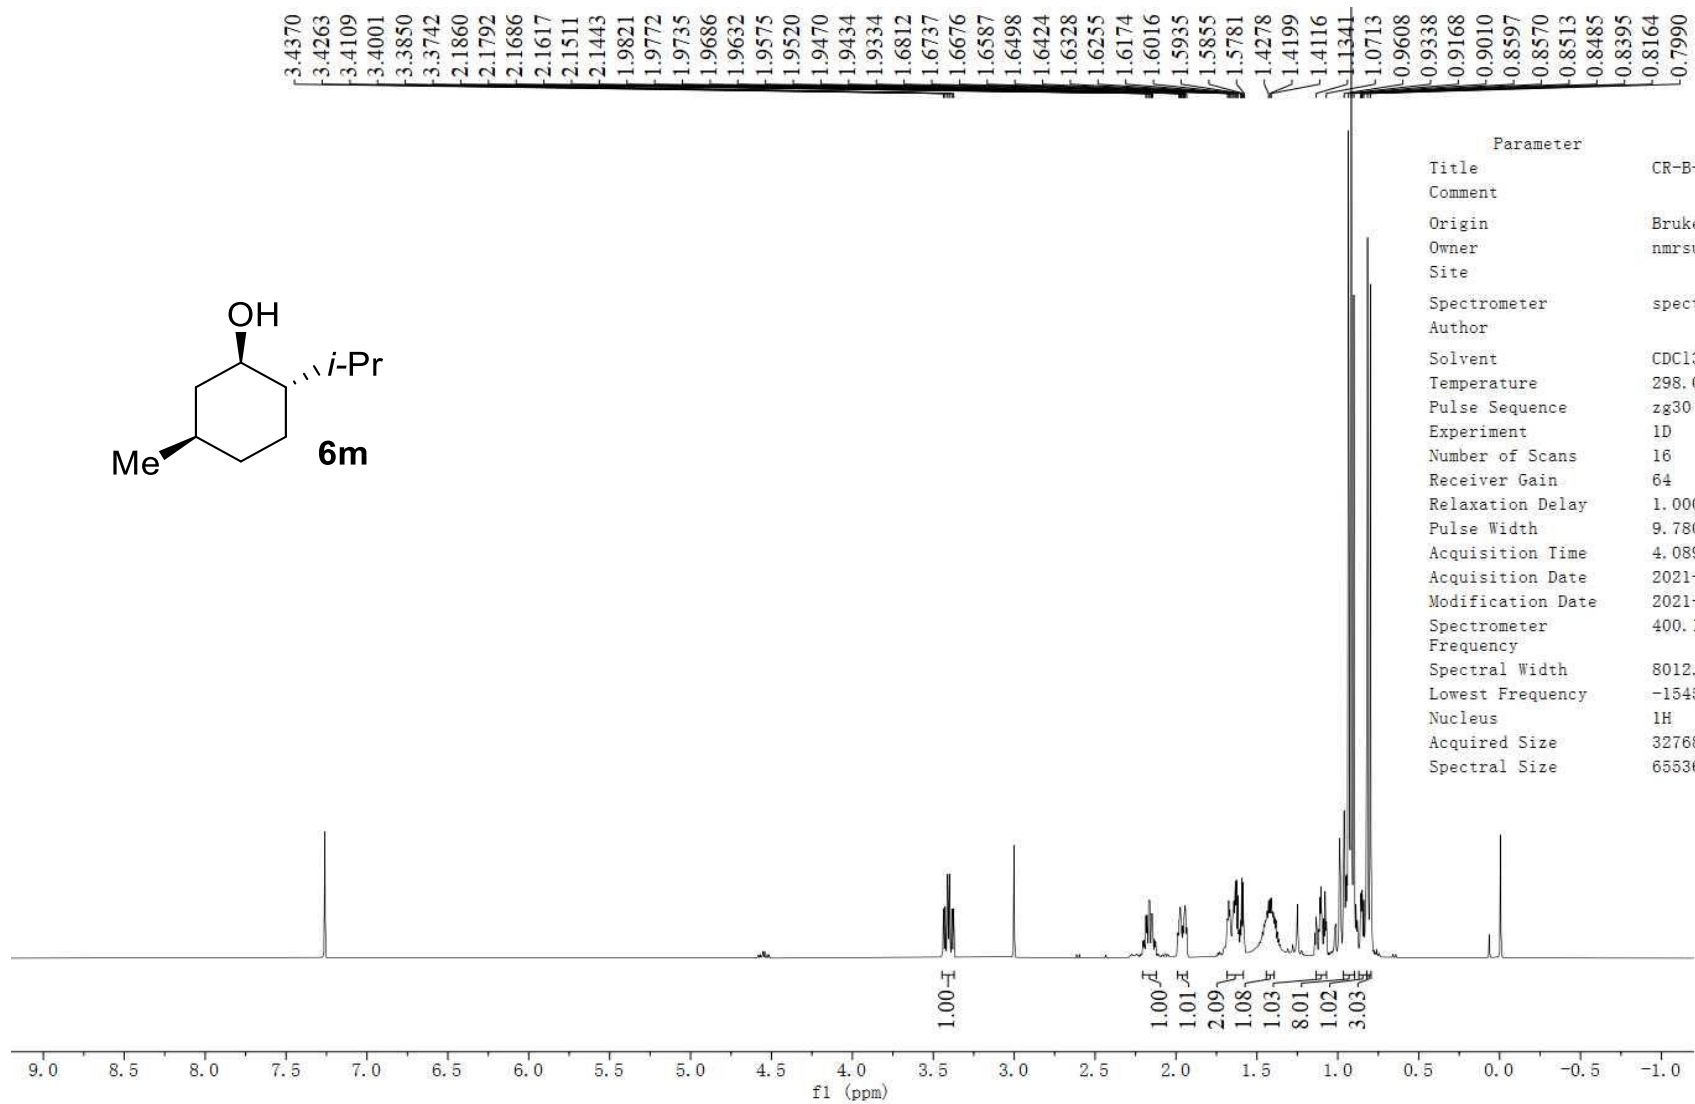

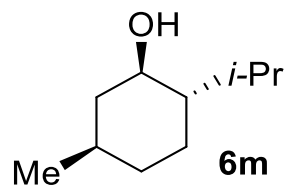

—71.70  
 —50.29  
 —45.20  
 /34.68  
 /31.78  
 /25.99  
 /23.28  
 /22.35  
 /21.15  
 /16.24

| Parameter         | Value               |
|-------------------|---------------------|
| Title             | CR-B-83.3.fid       |
| Comment           |                     |
| Origin            | Bruker BioSpin GmbH |
| Owner             | nmrsu               |
| Site              |                     |
| Spectrometer      | spect               |
| Author            |                     |
| Solvent           | CDCl3               |
| Temperature       | 298.0               |
| Pulse Sequence    | zgpg30              |
| Experiment        | 1D                  |
| Number of Scans   | 600                 |
| Receiver Gain     | 202                 |
| Relaxation Delay  | 2.0000              |
| Pulse Width       | 10.5800             |
| Acquisition Time  | 1.3631              |
| Acquisition Date  | 2021-09-26T04:34:06 |
| Modification Date | 2021-09-26T04:34:08 |
| Spectrometer      | 100.63              |
| Frequency         |                     |
| Spectral Width    | 24038.5             |
| Lowest Frequency  | -1944.2             |
| Nucleus           | 13C                 |
| Acquired Size     | 32768               |
| Spectral Size     | 65536               |

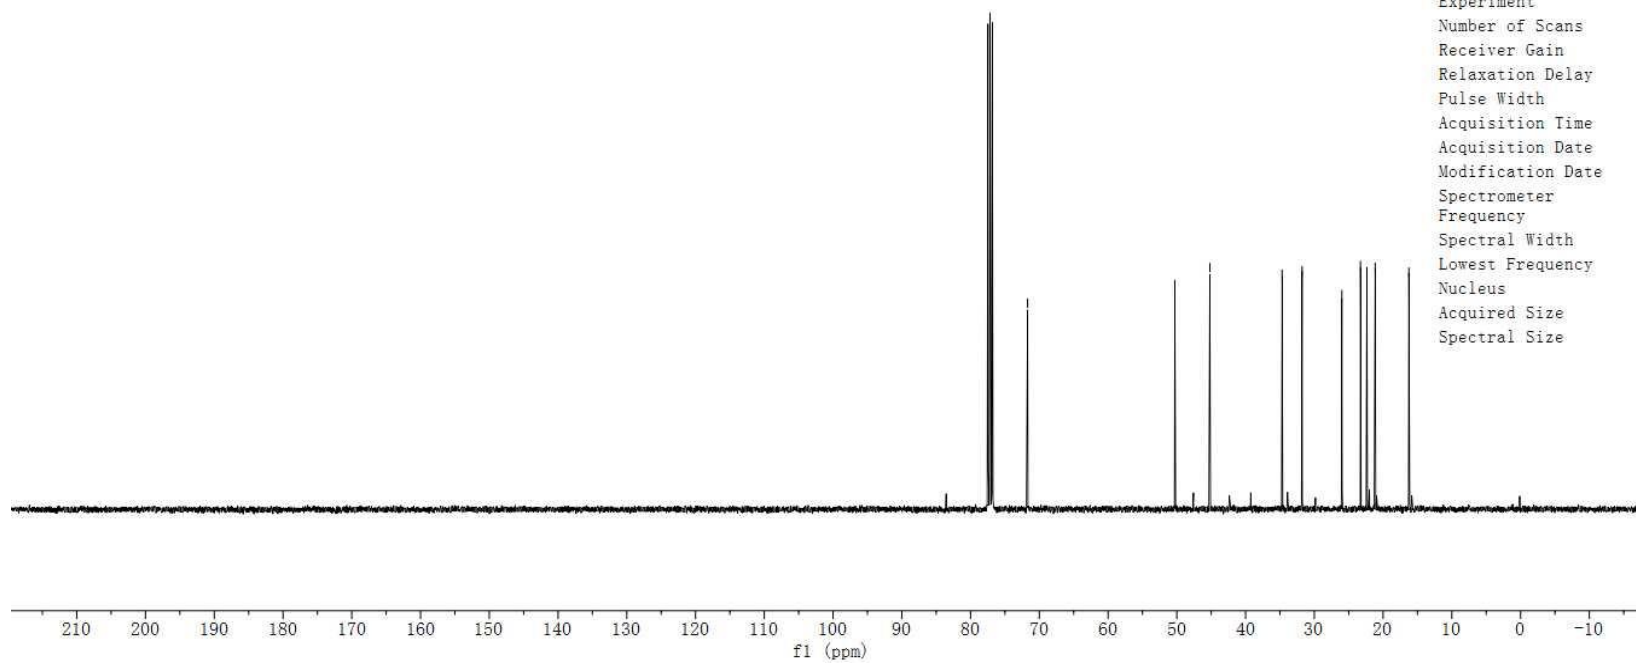

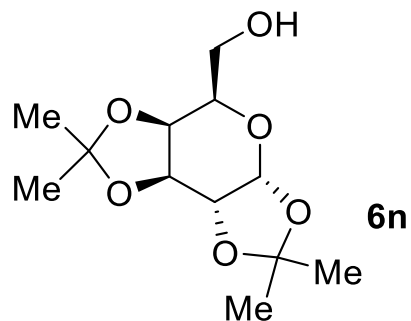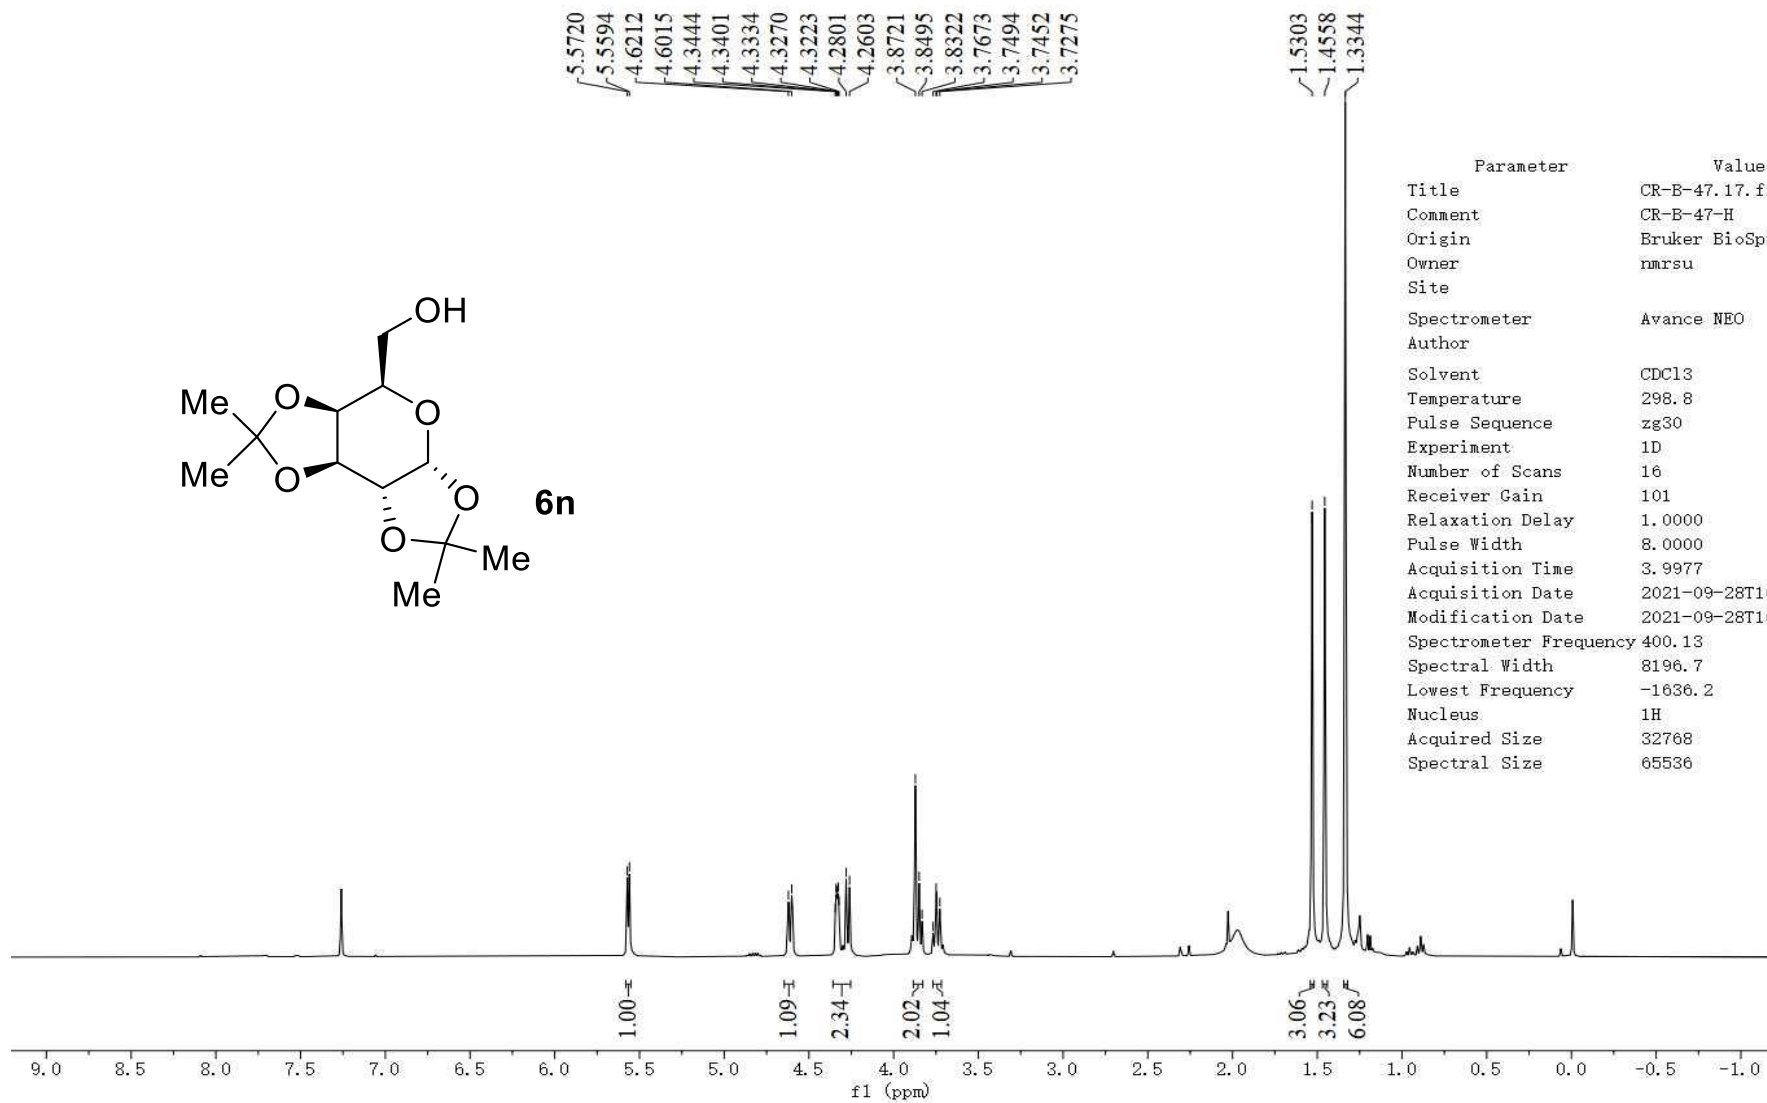

| Parameter              | Value               |
|------------------------|---------------------|
| Title                  | CR-B-47.17.fid      |
| Comment                | CR-B-47-H           |
| Origin                 | Bruker BioSpin GmbH |
| Owner                  | nmrsu               |
| Site                   |                     |
| Spectrometer           | Avance NEO          |
| Author                 |                     |
| Solvent                | CDC13               |
| Temperature            | 298.8               |
| Pulse Sequence         | zg30                |
| Experiment             | 1D                  |
| Number of Scans        | 16                  |
| Receiver Gain          | 101                 |
| Relaxation Delay       | 1.0000              |
| Pulse Width            | 8.0000              |
| Acquisition Time       | 3.9977              |
| Acquisition Date       | 2021-09-28T10:50:20 |
| Modification Date      | 2021-09-28T10:50:38 |
| Spectrometer Frequency | 400.13              |
| Spectral Width         | 8196.7              |
| Lowest Frequency       | -1636.2             |
| Nucleus                | <sup>1</sup> H      |
| Acquired Size          | 32768               |
| Spectral Size          | 65536               |



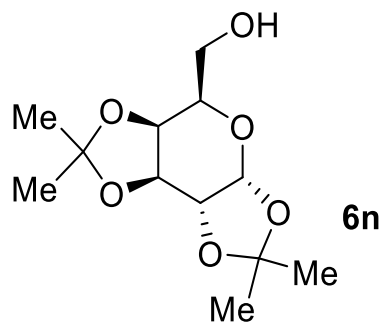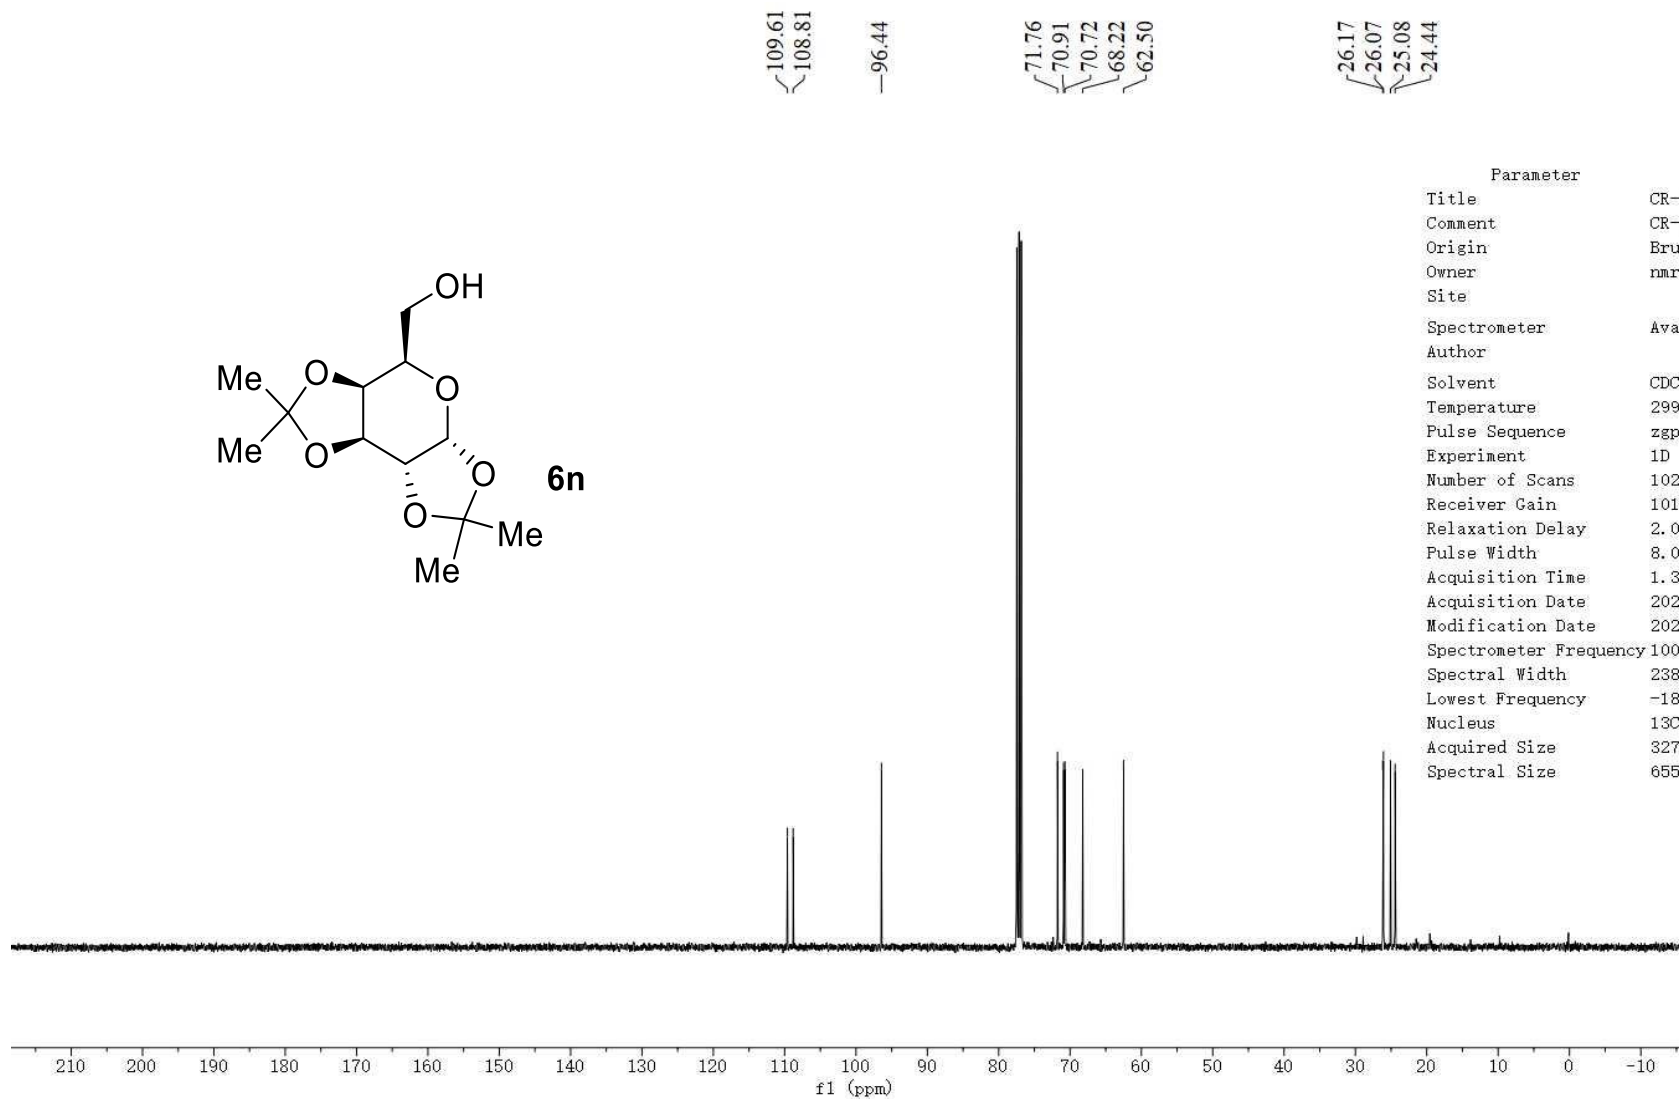

| Parameter              | Value               |
|------------------------|---------------------|
| Title                  | CR-B-47.18.fid      |
| Comment                | CR-B-47-C           |
| Origin                 | Bruker BioSpin GmbH |
| Owner                  | nrsu                |
| Site                   |                     |
| Spectrometer           | Avance NEO          |
| Author                 |                     |
| Solvent                | CDCl <sub>3</sub>   |
| Temperature            | 299.5               |
| Pulse Sequence         | zgpg30              |
| Experiment             | 1D                  |
| Number of Scans        | 1024                |
| Receiver Gain          | 101                 |
| Relaxation Delay       | 2.0000              |
| Pulse Width            | 8.0000              |
| Acquisition Time       | 1.3763              |
| Acquisition Date       | 2021-09-28T11:49:46 |
| Modification Date      | 2021-09-28T11:50:06 |
| Spectrometer Frequency | 100.62              |
| Spectral Width         | 23809.5             |
| Lowest Frequency       | -1829.6             |
| Nucleus                | 13C                 |
| Acquired Size          | 32768               |
| Spectral Size          | 65536               |

4.0159  
4.0118  
4.0076  
4.0035  
3.9911  
3.9868  
3.9827  
3.9785  
2.3042  
2.2957  
2.2926  
2.2840  
2.2794  
2.2708  
2.2592  
2.2506  
2.2460  
2.2373  
2.2342  
2.2257  
1.9138  
1.8927  
1.8823  
1.8727  
1.8621  
1.8551  
1.8433  
1.7518  
1.7381  
1.7270  
1.7180  
1.7069  
1.6927  
1.6261  
1.6147  
1.6033  
1.2673  
1.2625  
1.2566  
1.2371  
1.2113  
1.2006  
0.9554  
0.9468  
0.9220  
0.9133  
0.8589  
0.8476  
0.8380

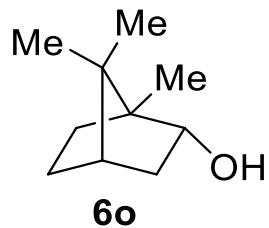

| Parameter              | Value               |
|------------------------|---------------------|
| Title                  | CR-B-85             |
| Comment                |                     |
| Origin                 | Bruker BioSpin GmbH |
| Owner                  | nmrsu               |
| Site                   |                     |
| Spectrometer           | spect               |
| Author                 |                     |
| Solvent                | CDCl3               |
| Temperature            | 298.0               |
| Pulse Sequence         | zg30                |
| Experiment             | 1D                  |
| Number of Scans        | 16                  |
| Receiver Gain          | 31                  |
| Relaxation Delay       | 1.0000              |
| Pulse Width            | 9.7800              |
| Acquisition Time       | 4.0894              |
| Acquisition Date       | 2021-09-26T01:56:12 |
| Modification Date      | 2021-09-26T01:56:14 |
| Spectrometer Frequency | 400.15              |
| Spectral Width         | 8012.8              |
| Lowest Frequency       | -1545.8             |
| Nucleus                | 1H                  |
| Acquired Size          | 32768               |
| Spectral Size          | 65536               |

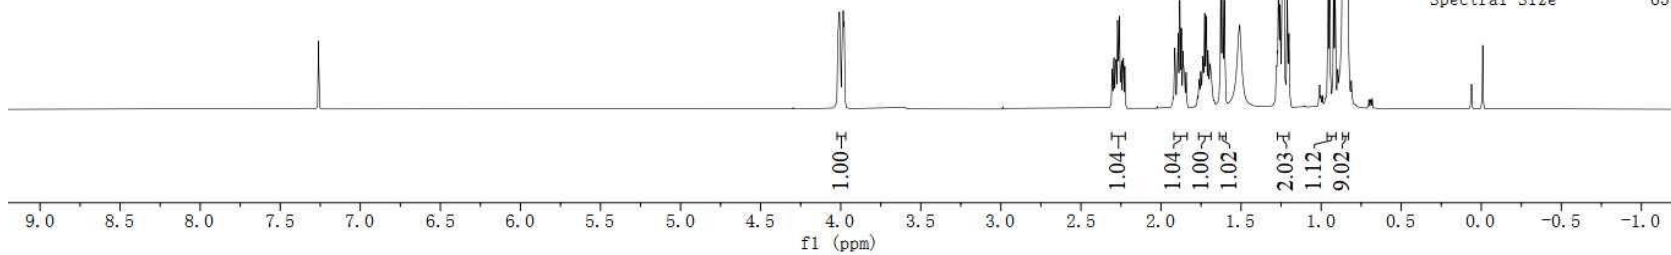

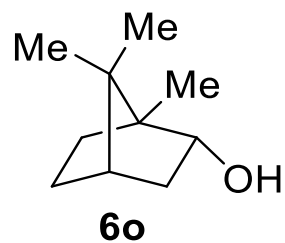

—77.50

~49.61  
~48.15  
~45.22  
~39.15

~28.41  
~26.04  
~20.32  
~18.81  
~13.46

| Parameter              | Value               |
|------------------------|---------------------|
| Title                  | CR-B-85             |
| Comment                |                     |
| Origin                 | Bruker BioSpin GmbH |
| Owner                  | nmrsu               |
| Site                   |                     |
| Spectrometer           | spect               |
| Author                 |                     |
| Solvent                | CDCl3               |
| Temperature            | 298.0               |
| Pulse Sequence         | zpg30               |
| Experiment             | 1D                  |
| Number of Scans        | 600                 |
| Receiver Gain          | 202                 |
| Relaxation Delay       | 2.0000              |
| Pulse Width            | 10.5800             |
| Acquisition Time       | 1.3631              |
| Acquisition Date       | 2021-09-26T02:31:33 |
| Modification Date      | 2021-09-26T02:31:34 |
| Spectrometer Frequency | 100.62              |
| Spectral Width         | 24038.5             |
| Lowest Frequency       | -1945.2             |
| Nucleus                | 13C                 |
| Acquired Size          | 32768               |
| Spectral Size          | 65536               |

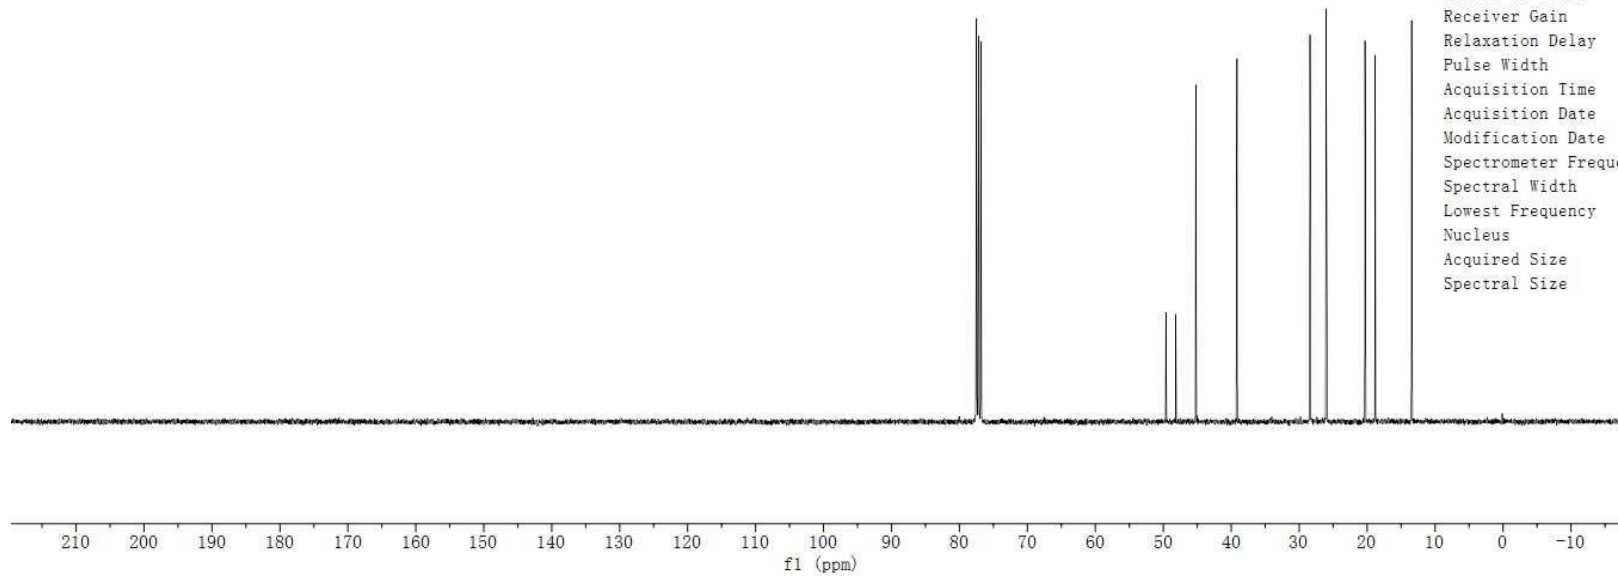

7.3246  
7.3075  
7.2888  
7.2599  
7.2566  
7.2474  
7.2420  
7.2349  
7.2217  
7.2181  
7.2011

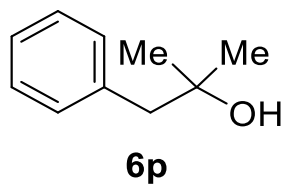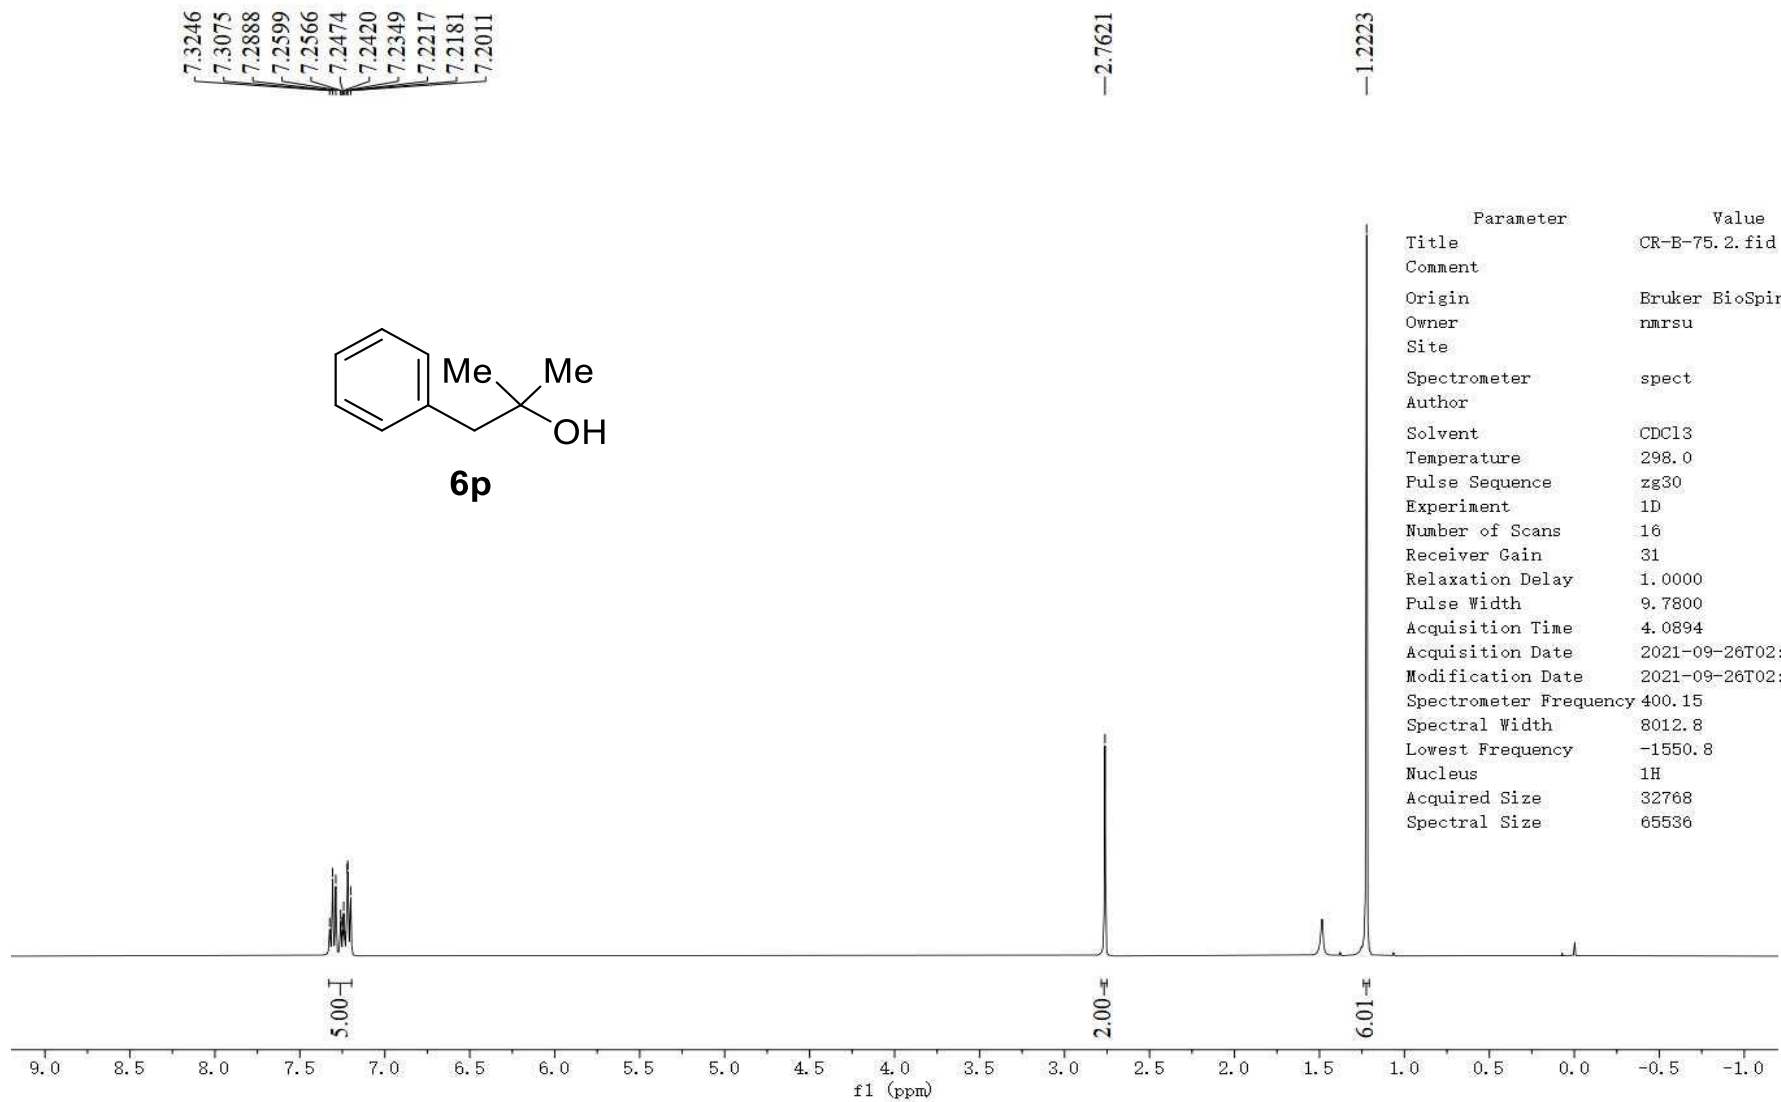

| Parameter              | Value               |
|------------------------|---------------------|
| Title                  | CR-B-75. 2. fid     |
| Comment                |                     |
| Origin                 | Bruker BioSpin GmbH |
| Owner                  | nmsu                |
| Site                   |                     |
| Spectrometer           | spect               |
| Author                 |                     |
| Solvent                | CDC13               |
| Temperature            | 298.0               |
| Pulse Sequence         | zg30                |
| Experiment             | 1D                  |
| Number of Scans        | 16                  |
| Receiver Gain          | 31                  |
| Relaxation Delay       | 1.0000              |
| Pulse Width            | 9.7800              |
| Acquisition Time       | 4.0894              |
| Acquisition Date       | 2021-09-26T02:37:07 |
| Modification Date      | 2021-09-26T02:37:08 |
| Spectrometer Frequency | 400.15              |
| Spectral Width         | 8012.8              |
| Lowest Frequency       | -1550.8             |
| Nucleus                | 1H                  |
| Acquired Size          | 32768               |
| Spectral Size          | 65536               |

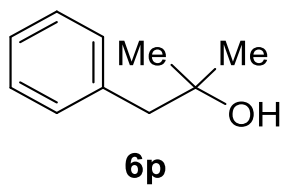

137.89  
130.59  
128.32  
126.61

70.87

49.87

29.29

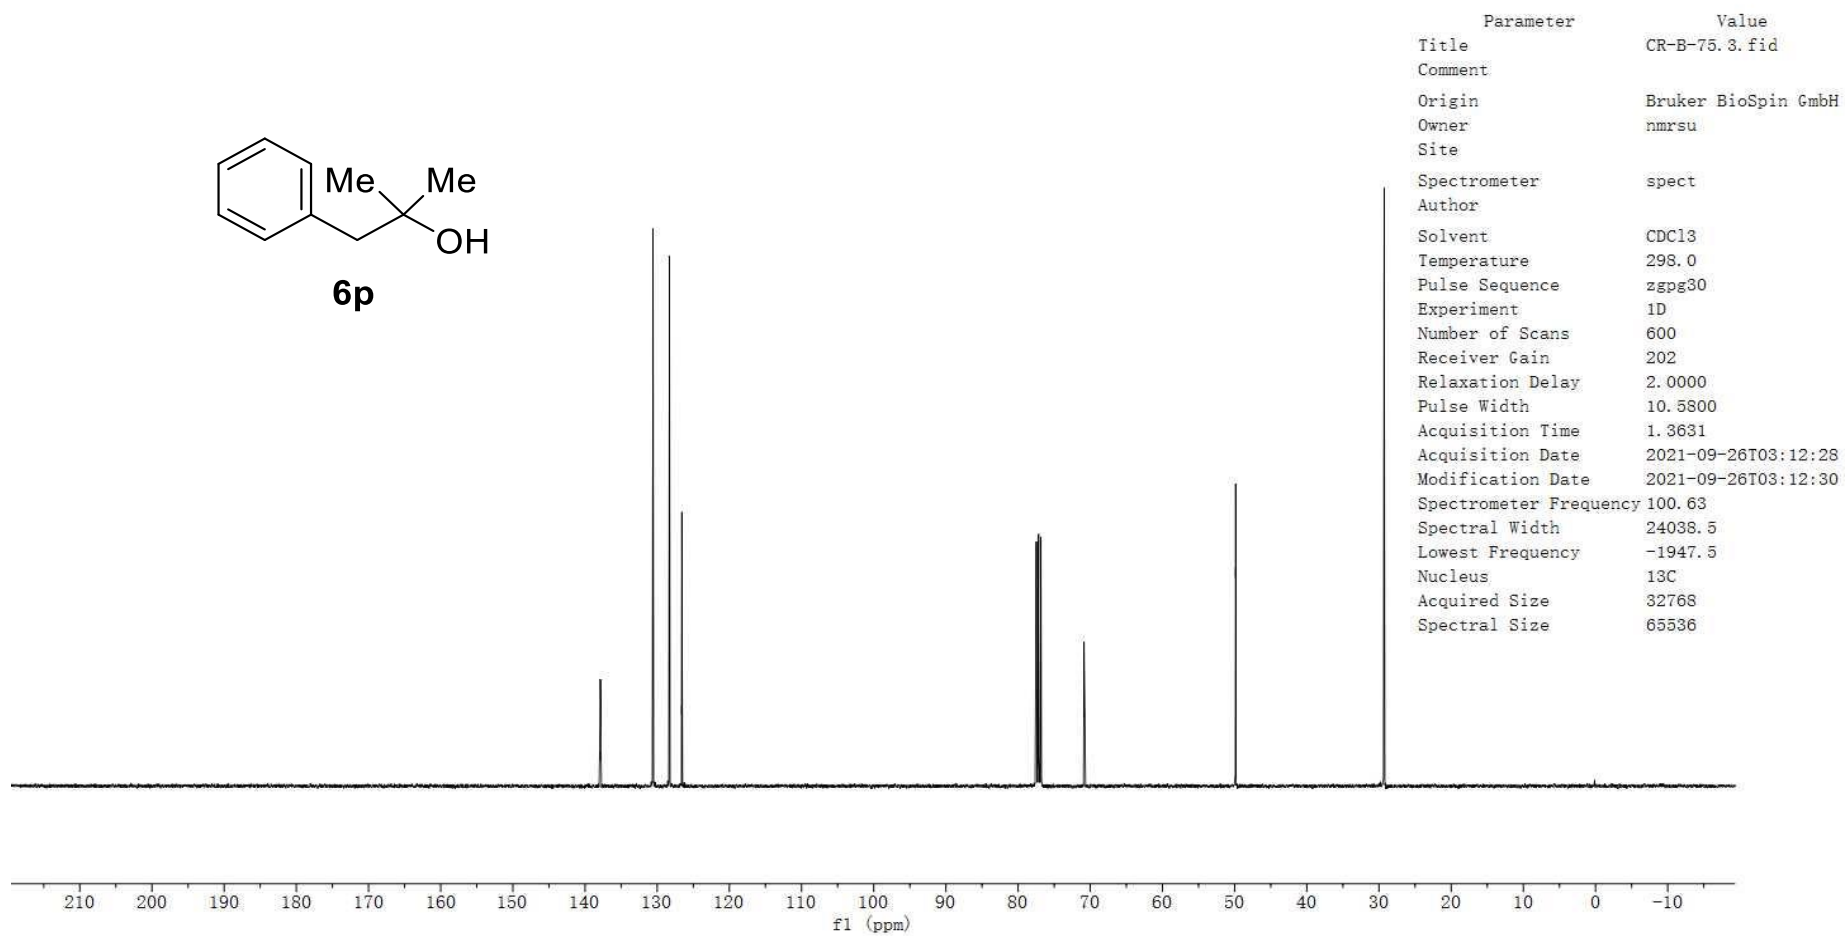

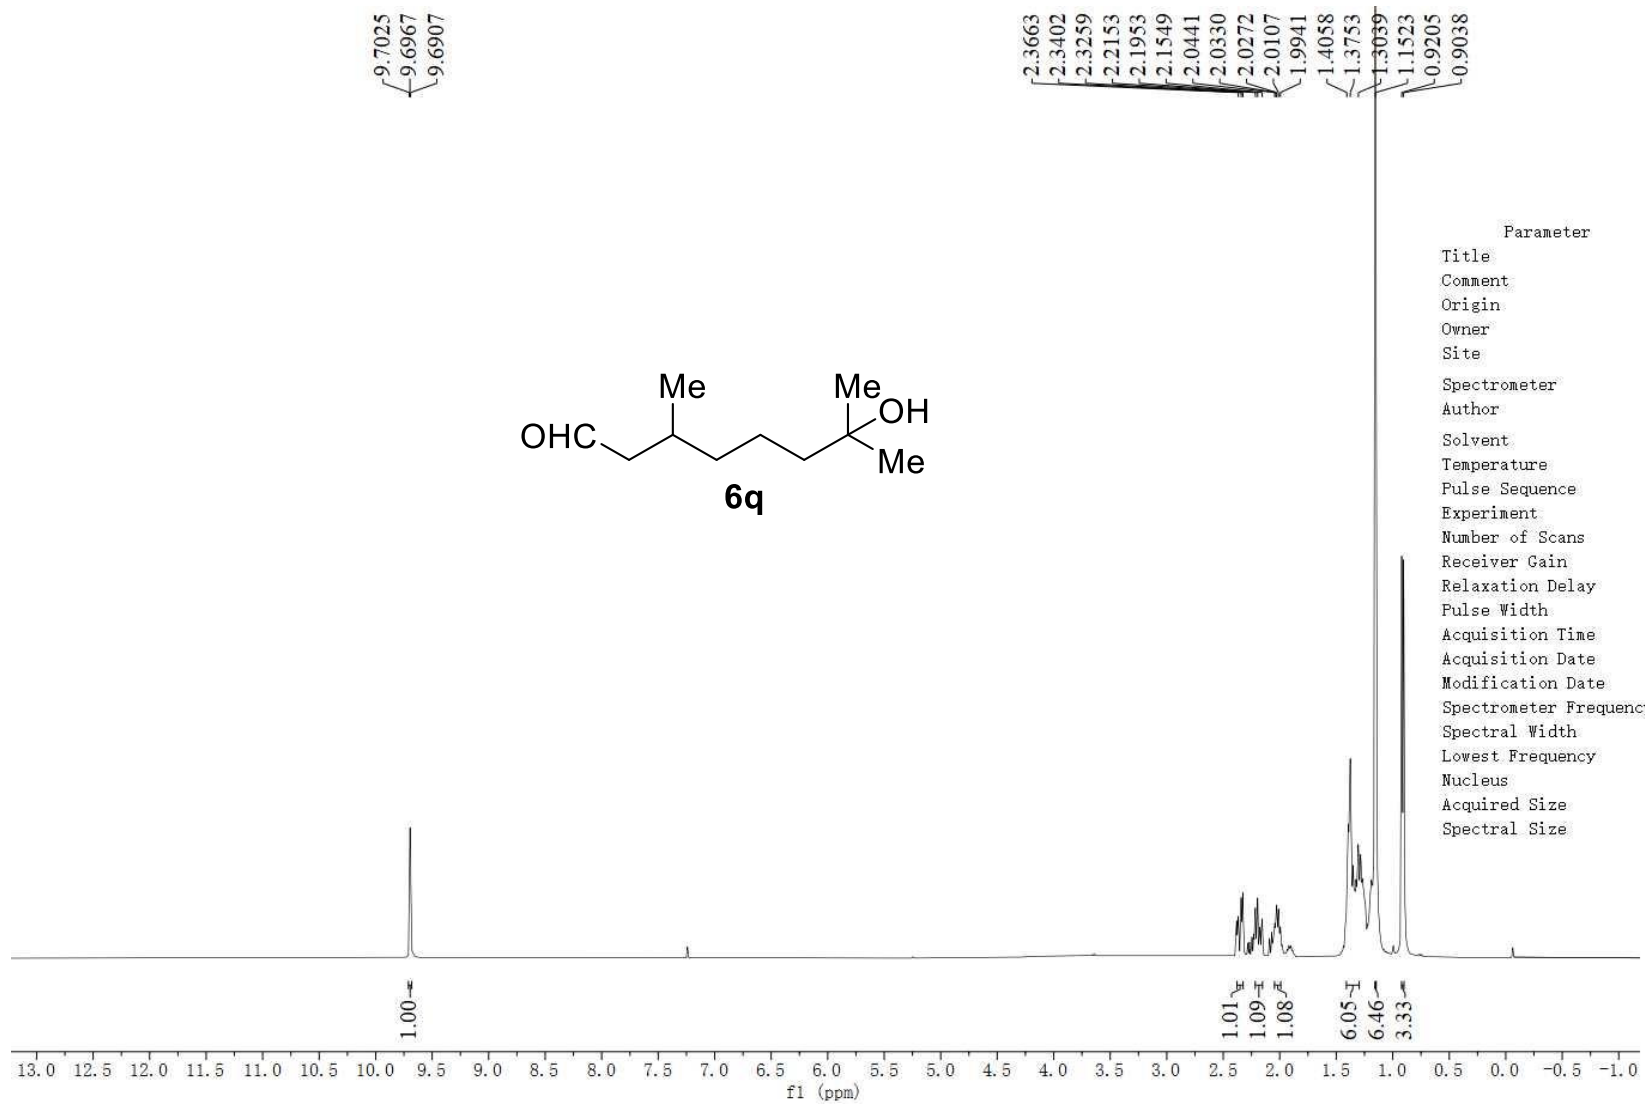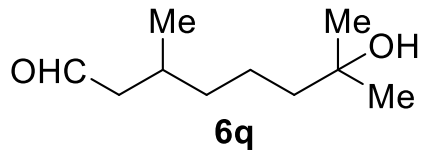

| Parameter              | Value               |
|------------------------|---------------------|
| Title                  | CR-B-89.13.fid      |
| Comment                | CR-B-89-H           |
| Origin                 | Bruker BioSpin GmbH |
| Owner                  | nmrsu               |
| Site                   |                     |
| Spectrometer           | Avance NEO          |
| Author                 |                     |
| Solvent                | CDCl3               |
| Temperature            | 296.8               |
| Pulse Sequence         | zg30                |
| Experiment             | 1D                  |
| Number of Scans        | 16                  |
| Receiver Gain          | 32                  |
| Relaxation Delay       | 1.0000              |
| Pulse Width            | 8.0000              |
| Acquisition Time       | 3.9977              |
| Acquisition Date       | 2021-10-18T10:48:06 |
| Modification Date      | 2021-10-18T10:47:28 |
| Spectrometer Frequency | 400.13              |
| Spectral Width         | 8196.7              |
| Lowest Frequency       | -1635.3             |
| Nucleus                | 1H                  |
| Acquired Size          | 32768               |
| Spectral Size          | 65536               |

-203.24

-71.07

51.11  
43.89  
37.40  
29.34  
29.25  
28.18  
21.72  
20.02

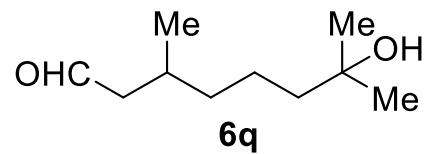

| Parameter              | Value               |
|------------------------|---------------------|
| Title                  | CR-B-89. 14. fid    |
| Comment                | CR-B-89-C           |
| Origin                 | Bruker BioSpin GmbH |
| Owner                  | nmrsu               |
| Site                   |                     |
| Spectrometer           | Avance NEO          |
| Author                 |                     |
| Solvent                | CDC13               |
| Temperature            | 297.4               |
| Pulse Sequence         | zgpg30              |
| Experiment             | 1D                  |
| Number of Scans        | 1024                |
| Receiver Gain          | 101                 |
| Relaxation Delay       | 2.0000              |
| Pulse Width            | 8.0000              |
| Acquisition Time       | 1.3763              |
| Acquisition Date       | 2021-10-18T11:47:20 |
| Modification Date      | 2021-10-18T11:46:40 |
| Spectrometer Frequency | 100.62              |
| Spectral Width         | 23809.5             |
| Lowest Frequency       | -1833.9             |
| Nucleus                | 13C                 |
| Acquired Size          | 32768               |
| Spectral Size          | 65536               |

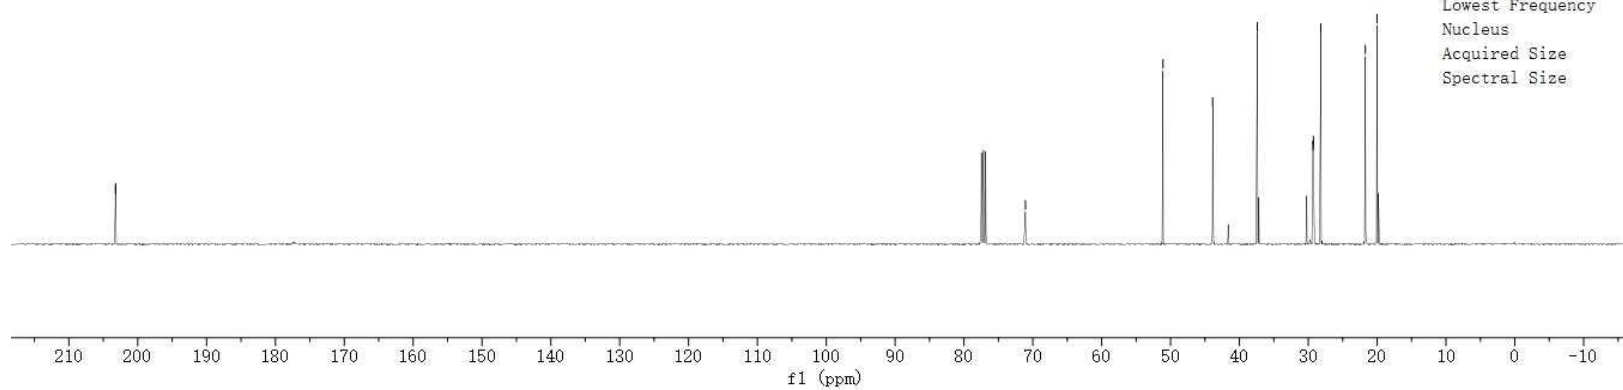

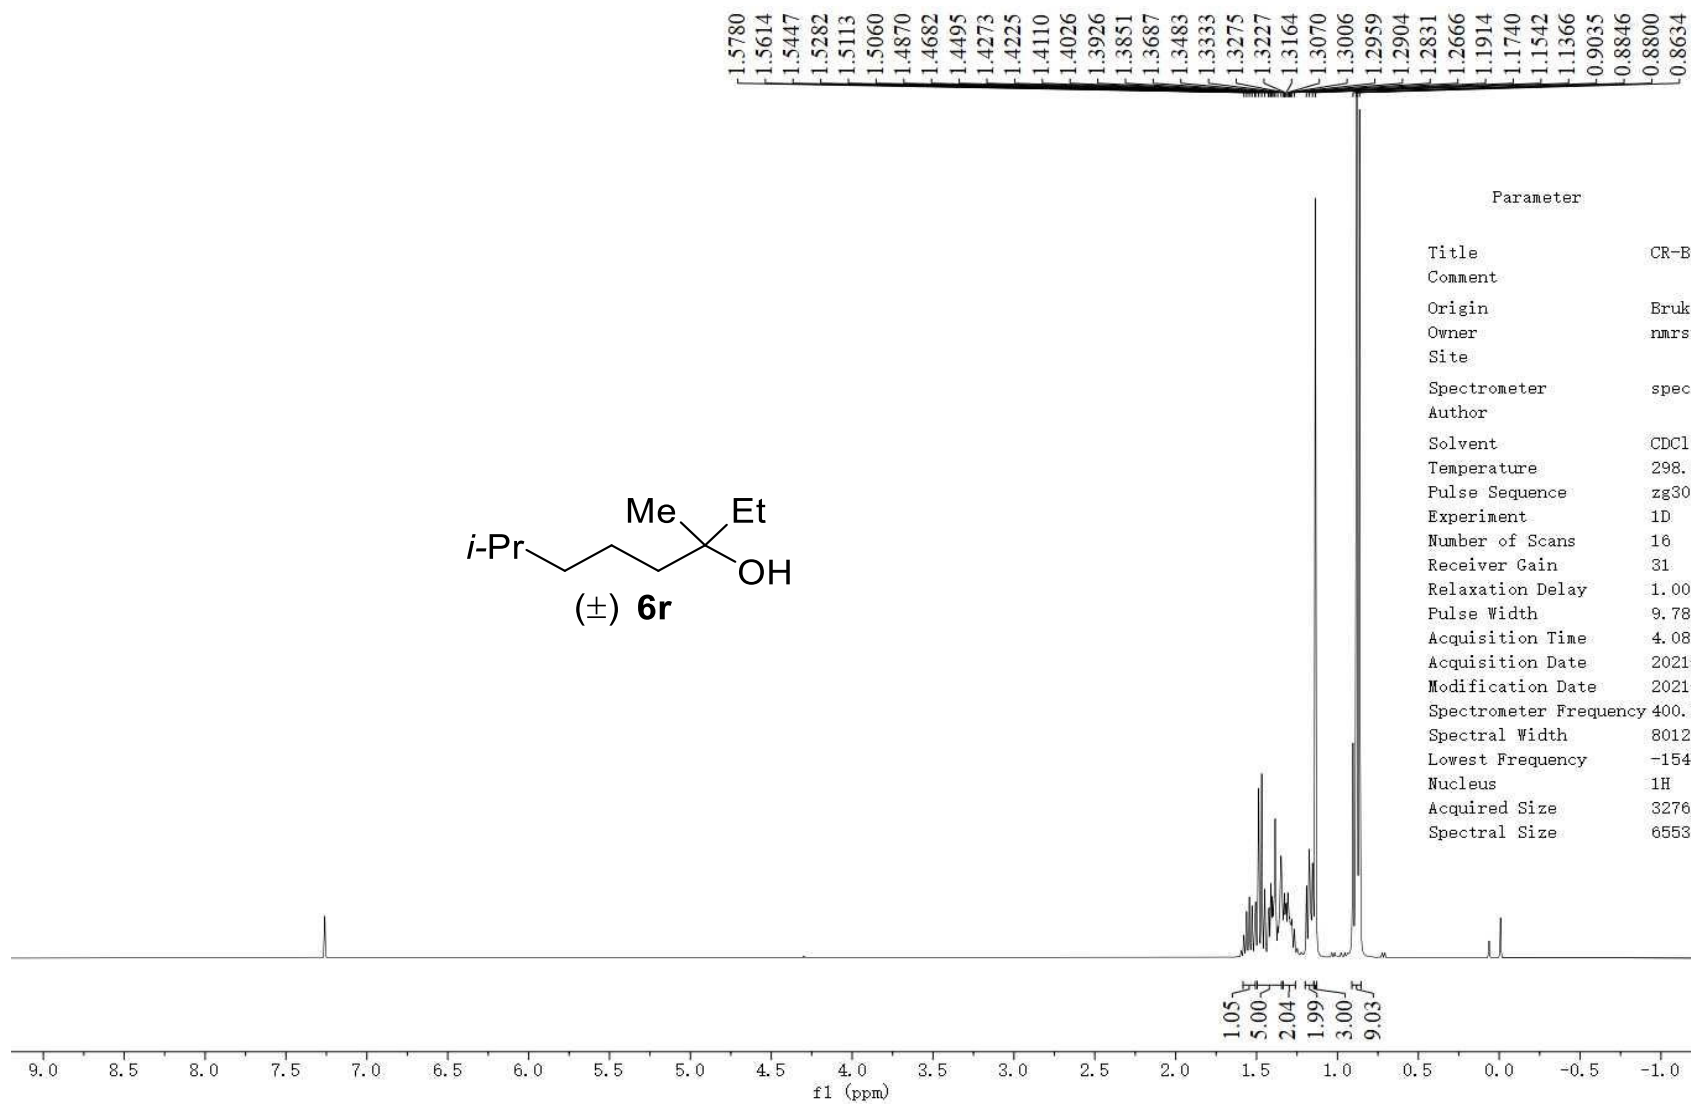

| Parameter              | Value               |
|------------------------|---------------------|
| Title                  | CR-B-81             |
| Comment                |                     |
| Origin                 | Bruker BioSpin GmbH |
| Owner                  | nmrsu               |
| Site                   |                     |
| Spectrometer           | spect               |
| Author                 |                     |
| Solvent                | CDC13               |
| Temperature            | 298.7               |
| Pulse Sequence         | zg30                |
| Experiment             | 1D                  |
| Number of Scans        | 16                  |
| Receiver Gain          | 31                  |
| Relaxation Delay       | 1.0000              |
| Pulse Width            | 9.7800              |
| Acquisition Time       | 4.0894              |
| Acquisition Date       | 2021-09-15T07:53:01 |
| Modification Date      | 2021-09-15T07:53:02 |
| Spectrometer Frequency | 400.15              |
| Spectral Width         | 8012.8              |
| Lowest Frequency       | -1545.5             |
| Nucleus                | <sup>1</sup> H      |
| Acquired Size          | 32768               |
| Spectral Size          | 65536               |



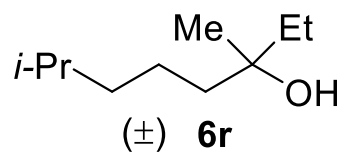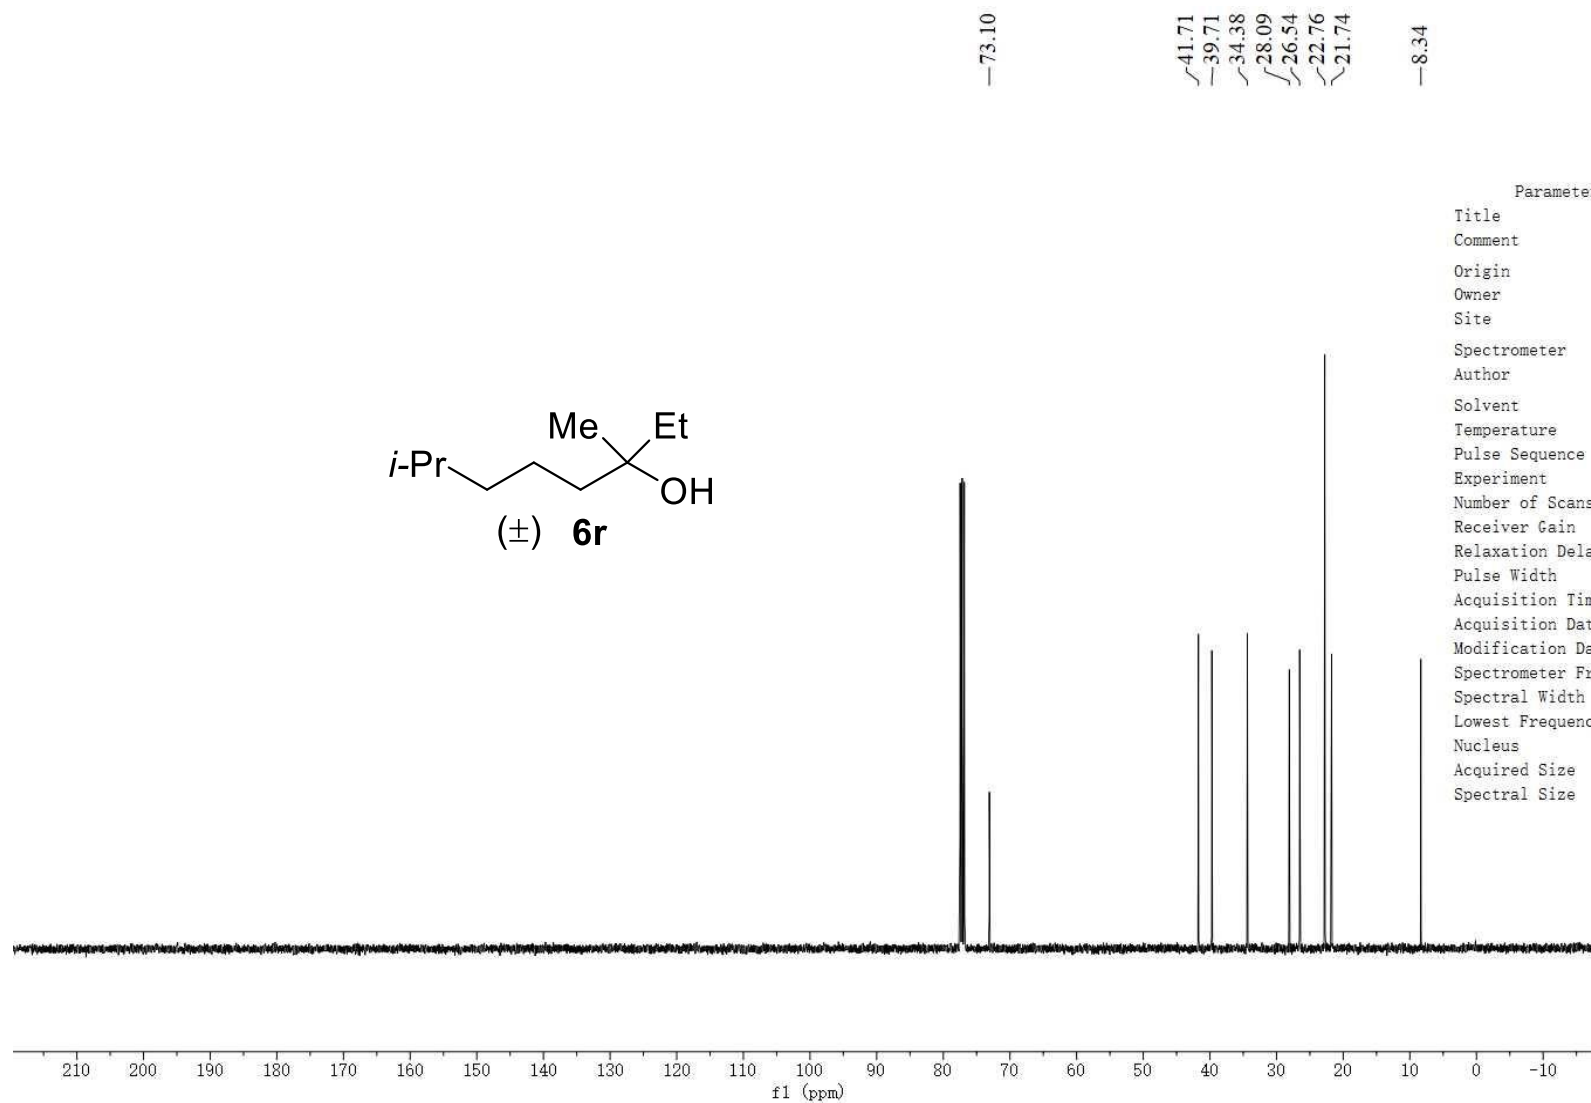

| Parameter              | Value               |
|------------------------|---------------------|
| Title                  | CR-B-81             |
| Comment                |                     |
| Origin                 | Bruker BioSpin GmbH |
| Owner                  | nmrsu               |
| Site                   |                     |
| Spectrometer           | spect               |
| Author                 |                     |
| Solvent                | CDCl <sub>3</sub>   |
| Temperature            | 299.3               |
| Pulse Sequence         | zgpg30              |
| Experiment             | 1D                  |
| Number of Scans        | 198                 |
| Receiver Gain          | 202                 |
| Relaxation Delay       | 2.0000              |
| Pulse Width            | 10.5800             |
| Acquisition Time       | 1.3631              |
| Acquisition Date       | 2021-09-15T08:12:50 |
| Modification Date      | 2021-09-15T08:12:52 |
| Spectrometer Frequency | 100.62              |
| Spectral Width         | 24038.5             |
| Lowest Frequency       | -1943.9             |
| Nucleus                | 13C                 |
| Acquired Size          | 32768               |
| Spectral Size          | 65536               |

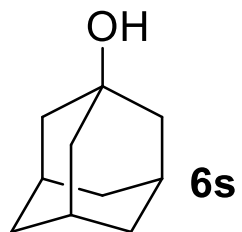

2.1261  
 1.7039  
 1.6973  
 1.6430  
 1.6129  
 1.5916  
 1.5610

| Parameter              | Value               |
|------------------------|---------------------|
| Title                  | CR-B-77             |
| Comment                |                     |
| Origin                 | Bruker BioSpin GmbH |
| Owner                  | nmrsu               |
| Site                   |                     |
| Spectrometer           | spect               |
| Author                 |                     |
| Solvent                | CDCl3               |
| Temperature            | 298.0               |
| Pulse Sequence         | zg30                |
| Experiment             | 1D                  |
| Number of Scans        | 16                  |
| Receiver Gain          | 31                  |
| Relaxation Delay       | 1.0000              |
| Pulse Width            | 9.7800              |
| Acquisition Time       | 4.0894              |
| Acquisition Date       | 2021-09-16T02:20:18 |
| Modification Date      | 2021-09-16T02:20:20 |
| Spectrometer Frequency | 400.15              |
| Spectral Width         | 8012.8              |
| Lowest Frequency       | -1545.5             |
| Nucleus                | 1H                  |
| Acquired Size          | 32768               |
| Spectral Size          | 65536               |

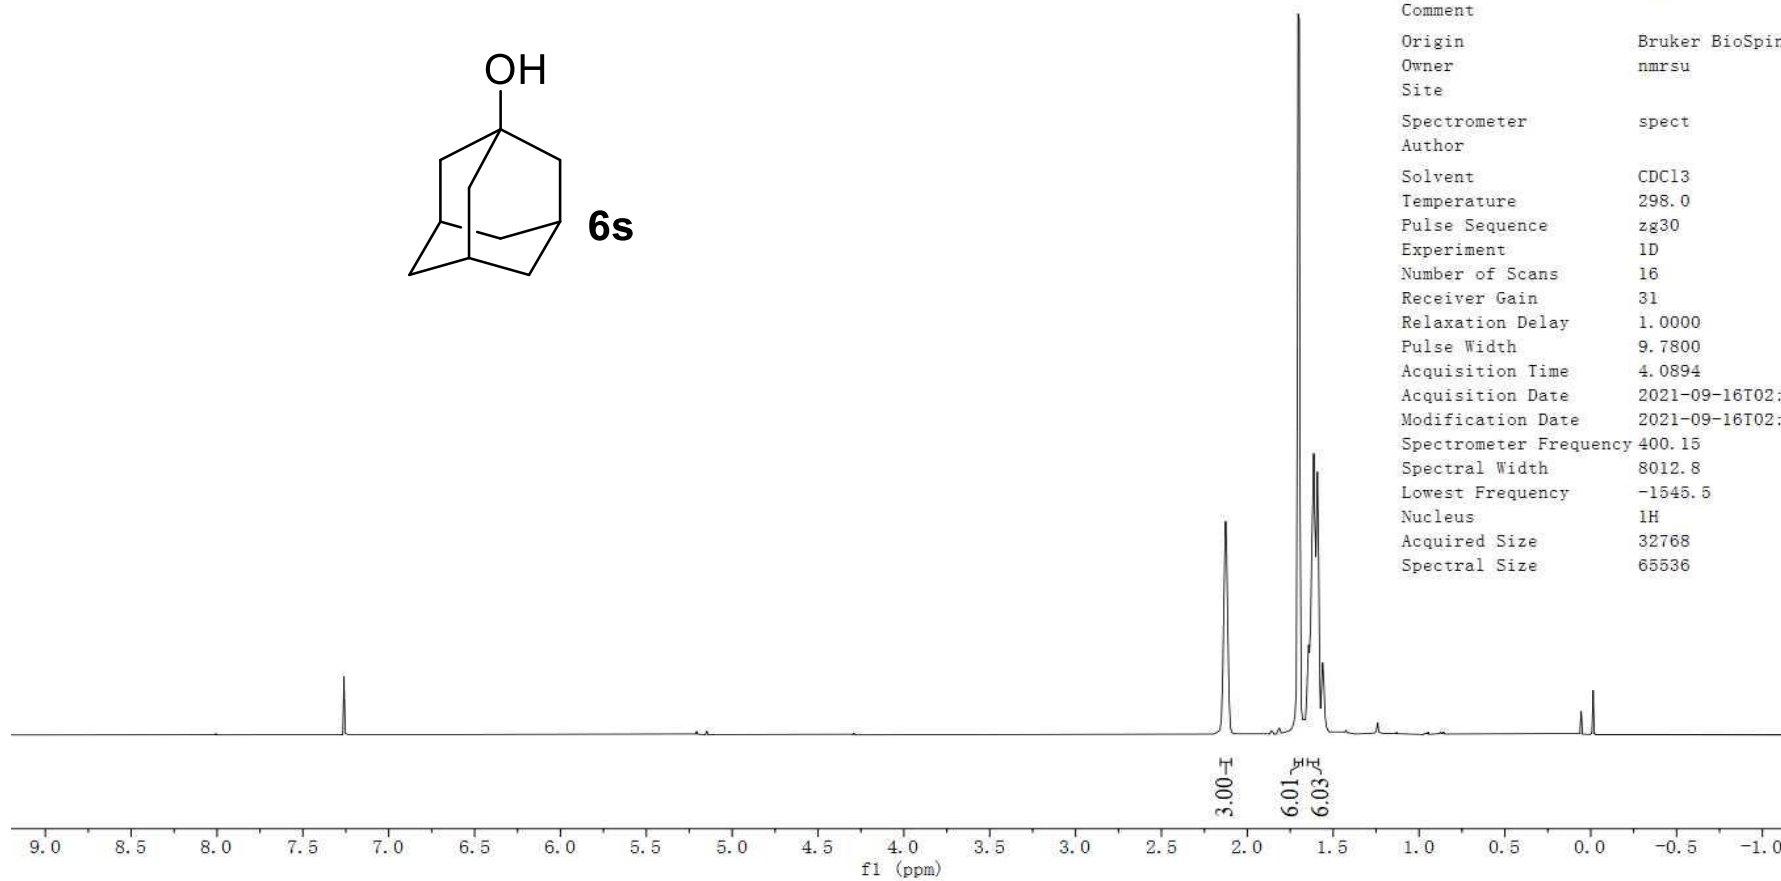

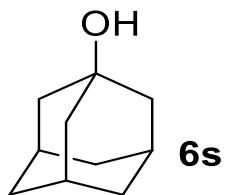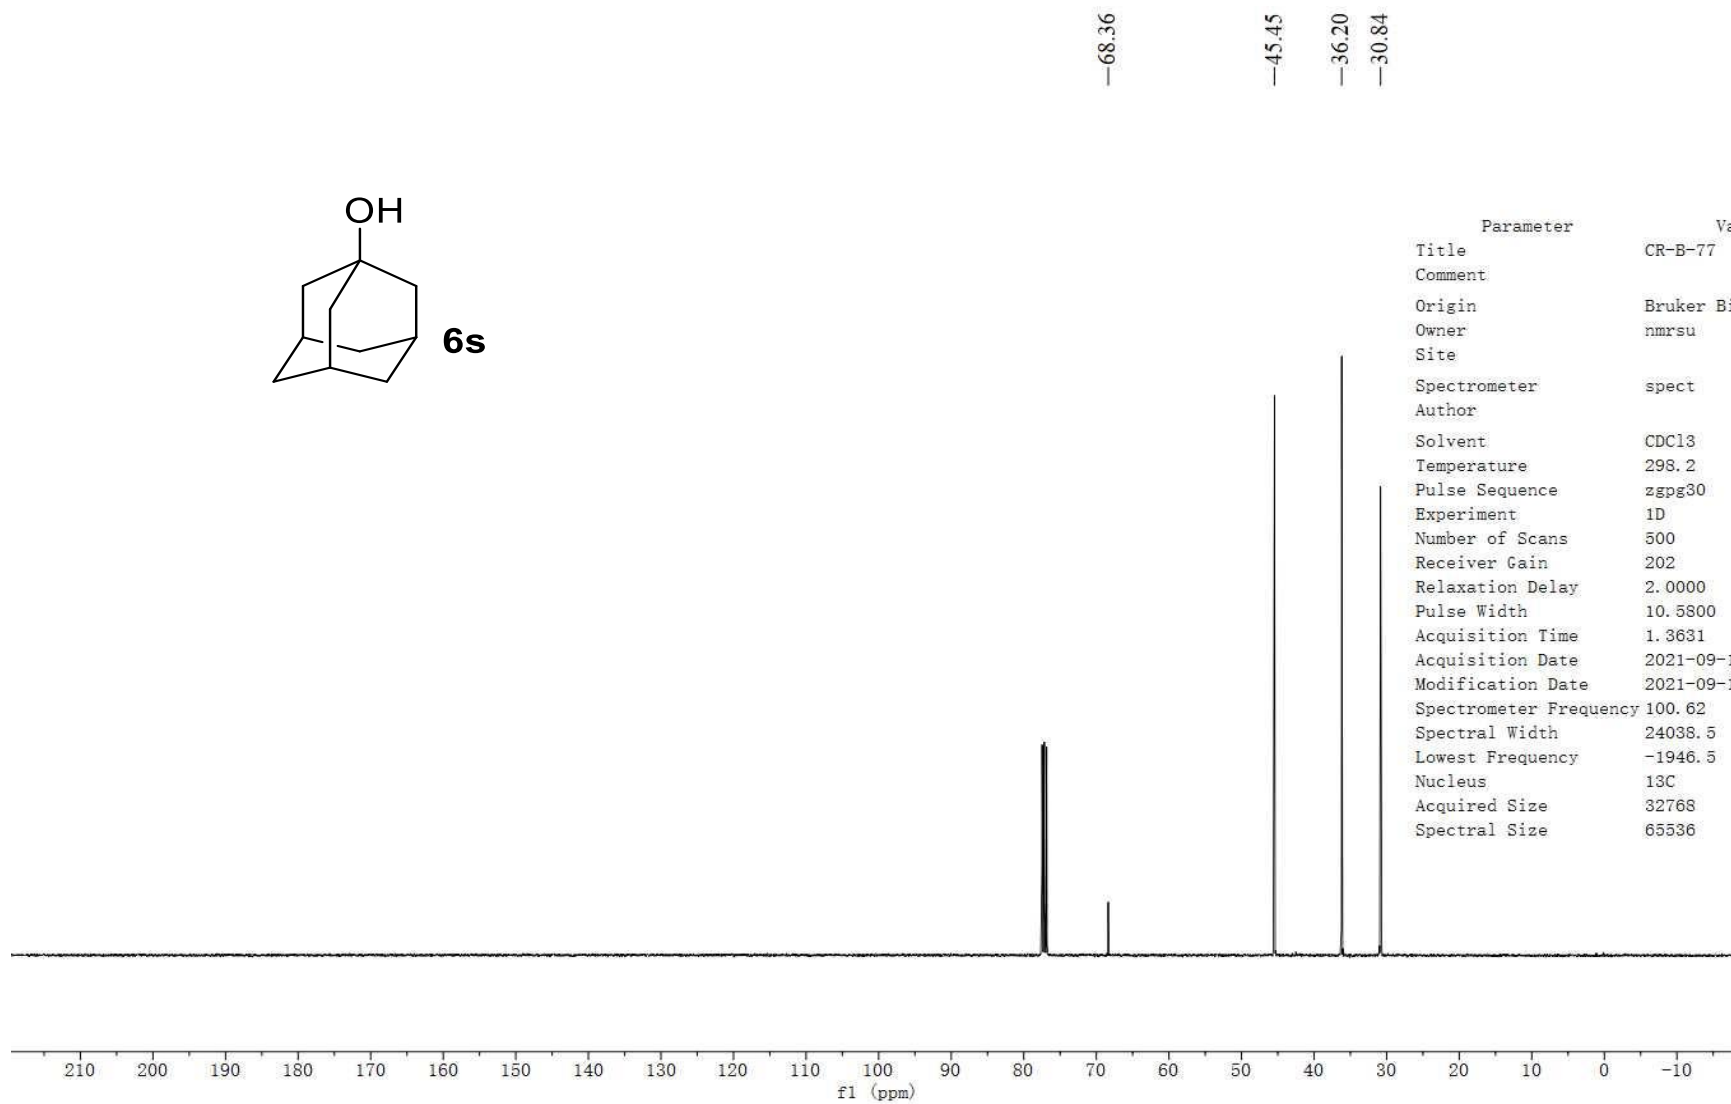

| Parameter              | Value               |
|------------------------|---------------------|
| Title                  | CR-B-77             |
| Comment                |                     |
| Origin                 | Bruker BioSpin GmbH |
| Owner                  | nmrsu               |
| Site                   |                     |
| Spectrometer           | spect               |
| Author                 |                     |
| Solvent                | CDC13               |
| Temperature            | 298.2               |
| Pulse Sequence         | zgpg30              |
| Experiment             | 1D                  |
| Number of Scans        | 500                 |
| Receiver Gain          | 202                 |
| Relaxation Delay       | 2.0000              |
| Pulse Width            | 10.5800             |
| Acquisition Time       | 1.3631              |
| Acquisition Date       | 2021-09-16T02:49:57 |
| Modification Date      | 2021-09-16T02:49:58 |
| Spectrometer Frequency | 100.62              |
| Spectral Width         | 24038.5             |
| Lowest Frequency       | -1946.5             |
| Nucleus                | 13C                 |
| Acquired Size          | 32768               |
| Spectral Size          | 65536               |

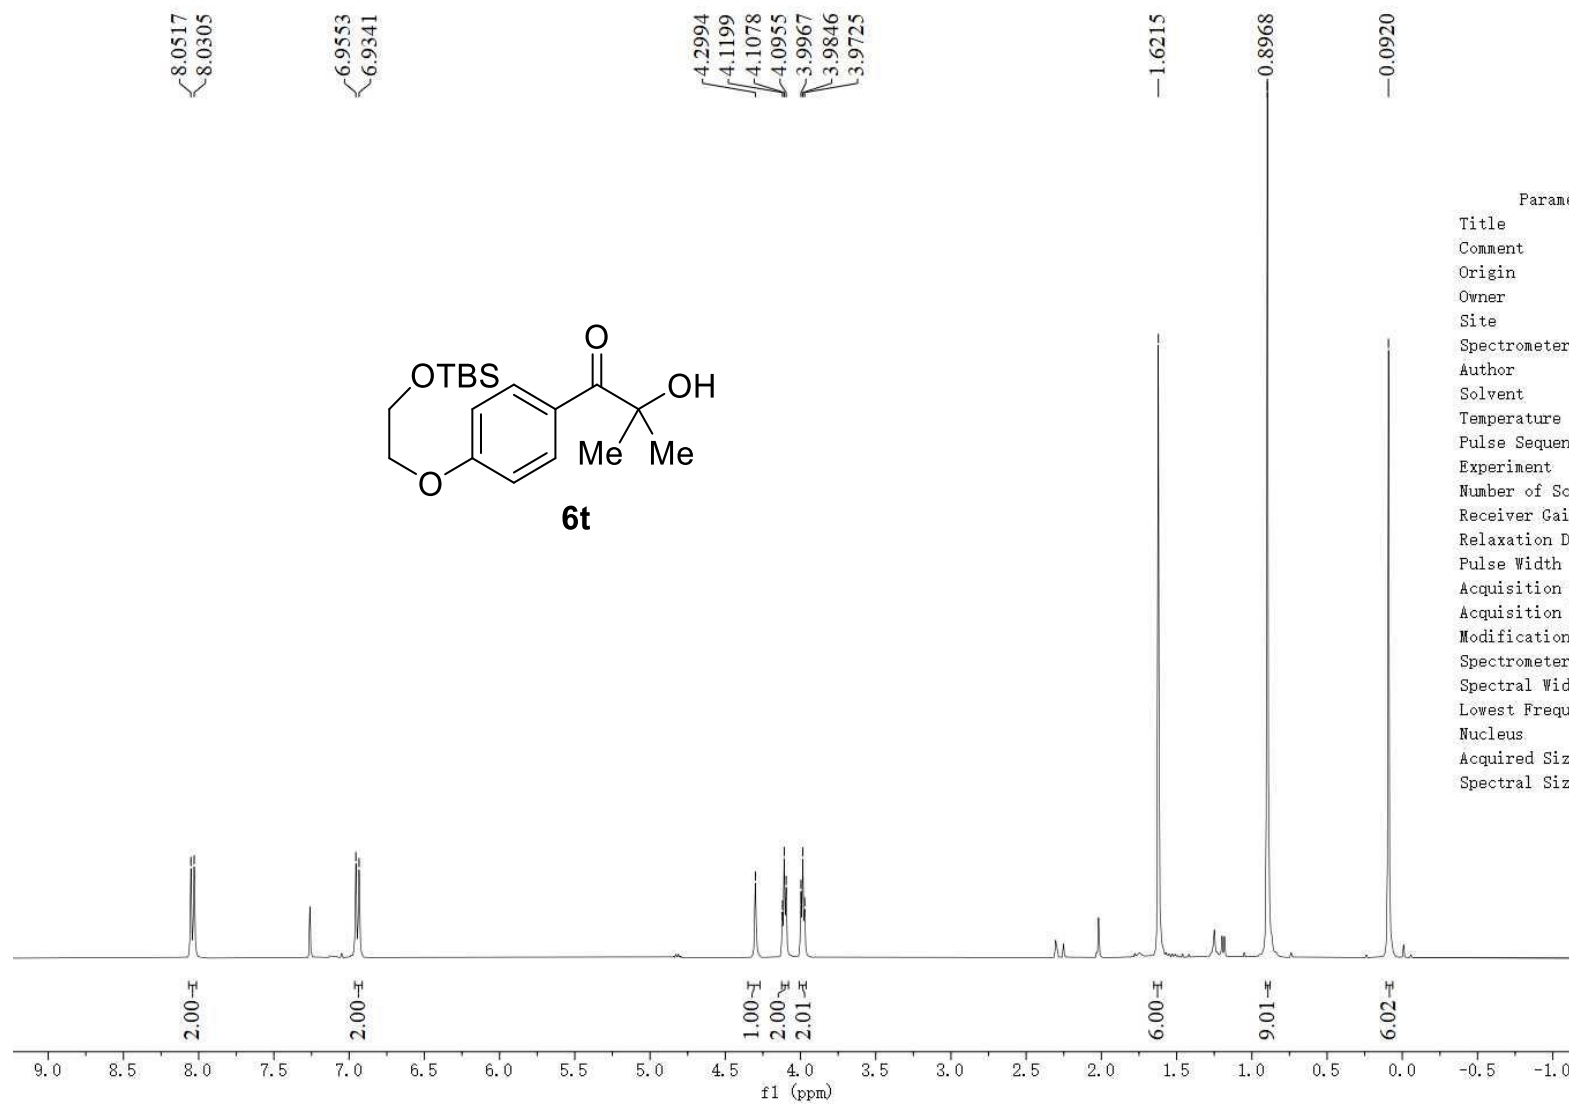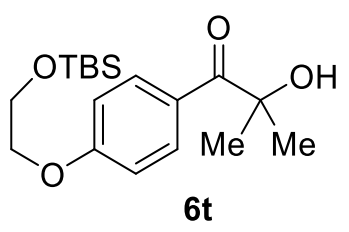

| Parameter              | Value               |
|------------------------|---------------------|
| Title                  | CR-B-100.23.fid     |
| Comment                | CR-B-100-H          |
| Origin                 | Bruker BioSpin GmbH |
| Owner                  | nmrsu               |
| Site                   |                     |
| Spectrometer           | Avance NEO          |
| Author                 |                     |
| Solvent                | CDCl3               |
| Temperature            | 298.7               |
| Pulse Sequence         | zg30                |
| Experiment             | 1D                  |
| Number of Scans        | 16                  |
| Receiver Gain          | 43                  |
| Relaxation Delay       | 1.0000              |
| Pulse Width            | 8.0000              |
| Acquisition Time       | 3.9977              |
| Acquisition Date       | 2021-09-28T14:44:14 |
| Modification Date      | 2021-09-28T14:44:34 |
| Spectrometer Frequency | 400.13              |
| Spectral Width         | 8196.7              |
| Lowest Frequency       | -1636.1             |
| Nucleus                | 1H                  |
| Acquired Size          | 32768               |
| Spectral Size          | 65536               |

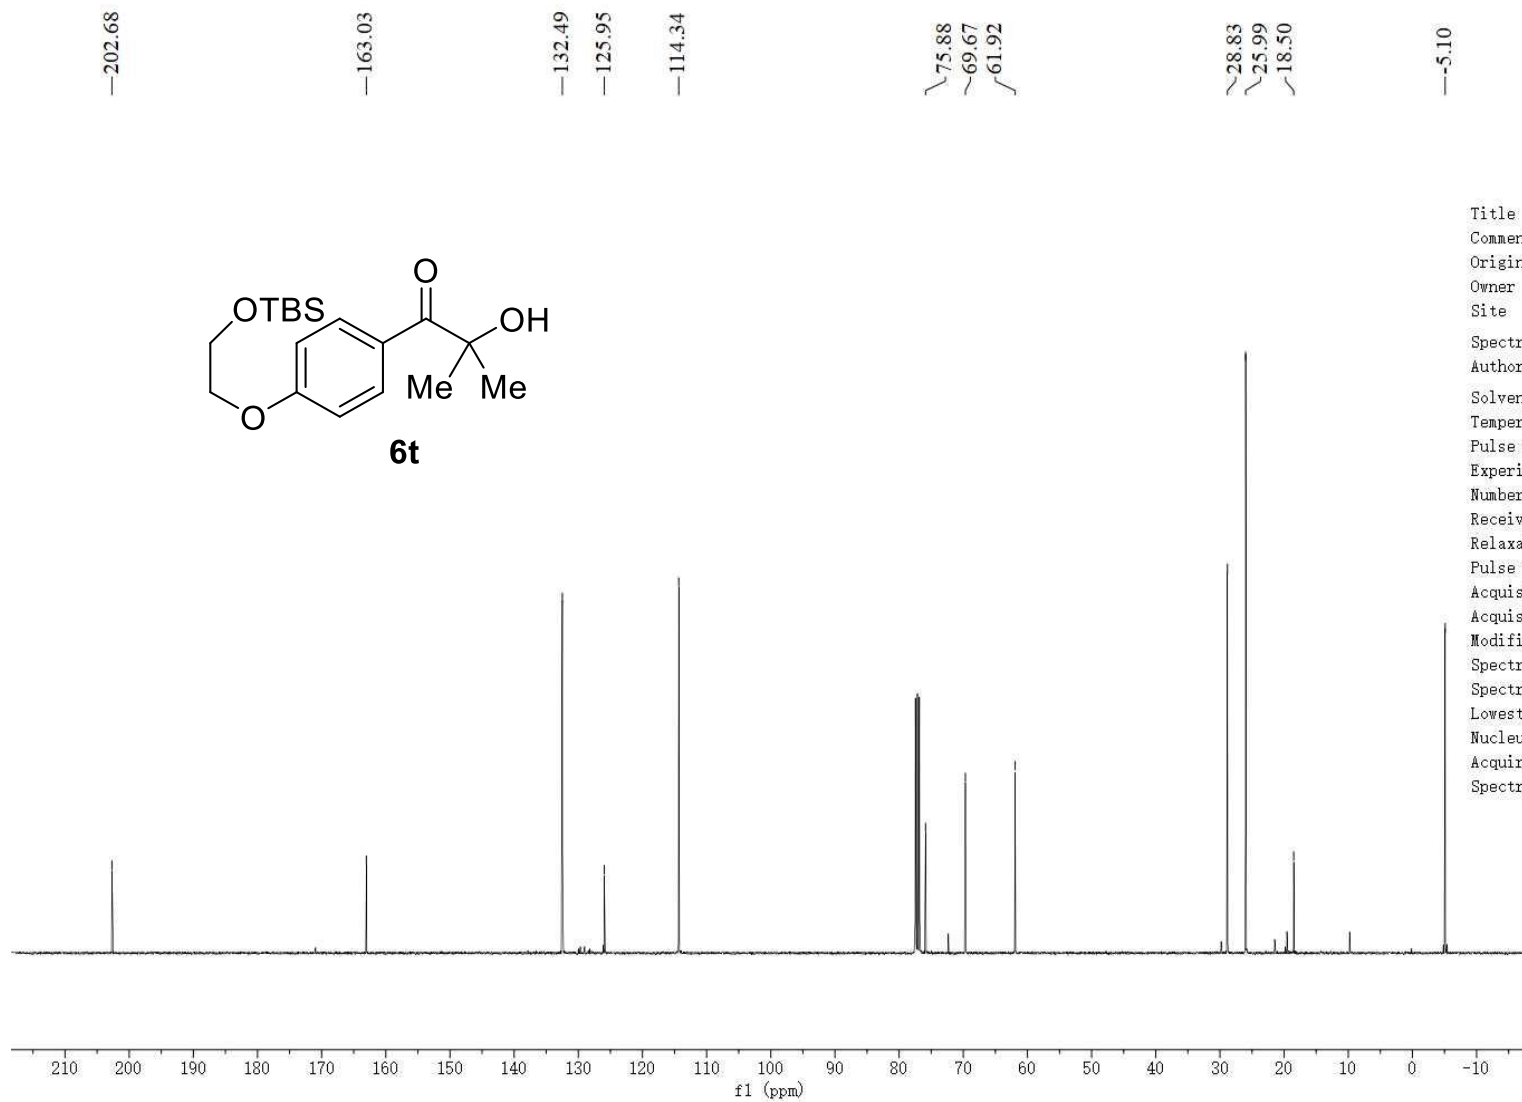

| Parameter              | Value               |
|------------------------|---------------------|
| Title                  | CR-B-100.24.fid     |
| Comment                | CR-B-100-C          |
| Origin                 | Bruker BioSpin GmbH |
| Owner                  | nmrsu               |
| Site                   |                     |
| Spectrometer           | Avance NEO          |
| Author                 |                     |
| Solvent                | CDCl3               |
| Temperature            | 299.4               |
| Pulse Sequence         | zgpg30              |
| Experiment             | 1D                  |
| Number of Scans        | 1024                |
| Receiver Gain          | 101                 |
| Relaxation Delay       | 2.0000              |
| Pulse Width            | 8.0000              |
| Acquisition Time       | 1.3763              |
| Acquisition Date       | 2021-09-28T15:45:51 |
| Modification Date      | 2021-09-28T15:46:10 |
| Spectrometer Frequency | 100.62              |
| Spectral Width         | 23809.5             |
| Lowest Frequency       | -1831.4             |
| Nucleus                | 13C                 |
| Acquired Size          | 32768               |
| Spectral Size          | 65536               |

7.1775  
7.1745  
7.1647  
7.1616  
6.9700  
6.9615  
6.9572  
6.9486  
6.8842  
6.8788  
6.8701

3.8623  
3.8465  
3.8308  
3.8305  
3.0916  
3.0757  
3.0577

-1.8856

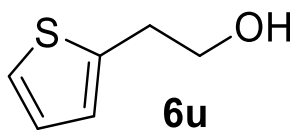

| Parameter              | Value               |
|------------------------|---------------------|
| Title                  | CR-B-93. 2. fid     |
| Comment                |                     |
| Origin                 | Bruker BioSpin GmbH |
| Owner                  | nmrsu               |
| Site                   |                     |
| Spectrometer           | spect               |
| Author                 |                     |
| Solvent                | CDCl3               |
| Temperature            | 298.0               |
| Pulse Sequence         | zg30                |
| Experiment             | 1D                  |
| Number of Scans        | 16                  |
| Receiver Gain          | 31                  |
| Relaxation Delay       | 1.0000              |
| Pulse Width            | 9.7800              |
| Acquisition Time       | 4.0894              |
| Acquisition Date       | 2021-11-03T23:14:12 |
| Modification Date      | 2021-11-03T23:14:14 |
| Spectrometer Frequency | 400.15              |
| Spectral Width         | 8012.8              |
| Lowest Frequency       | -1545.6             |
| Nucleus                | 1H                  |
| Acquired Size          | 32768               |
| Spectral Size          | 65536               |

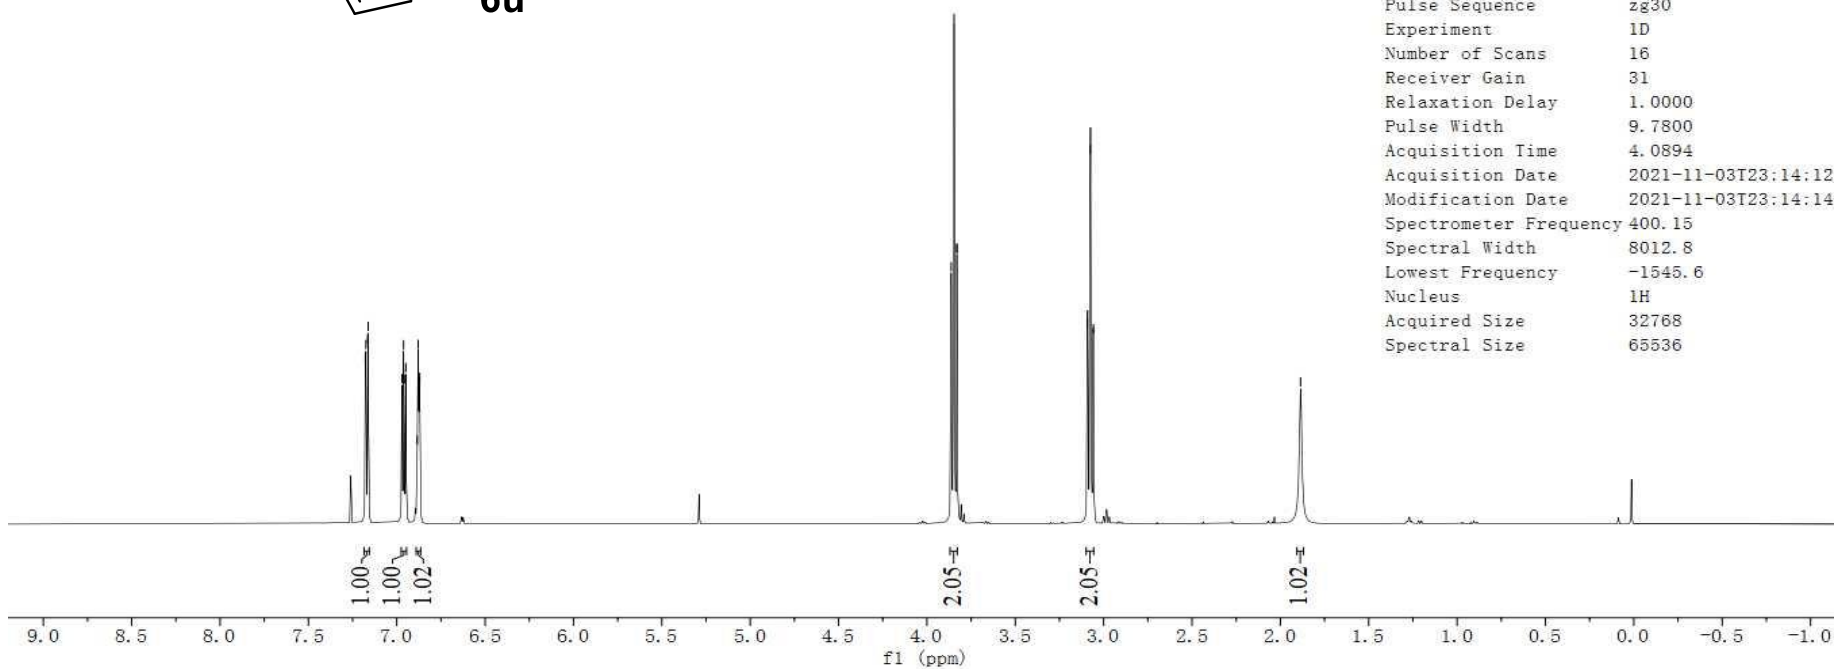

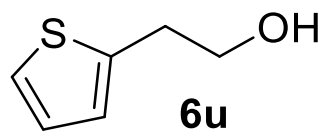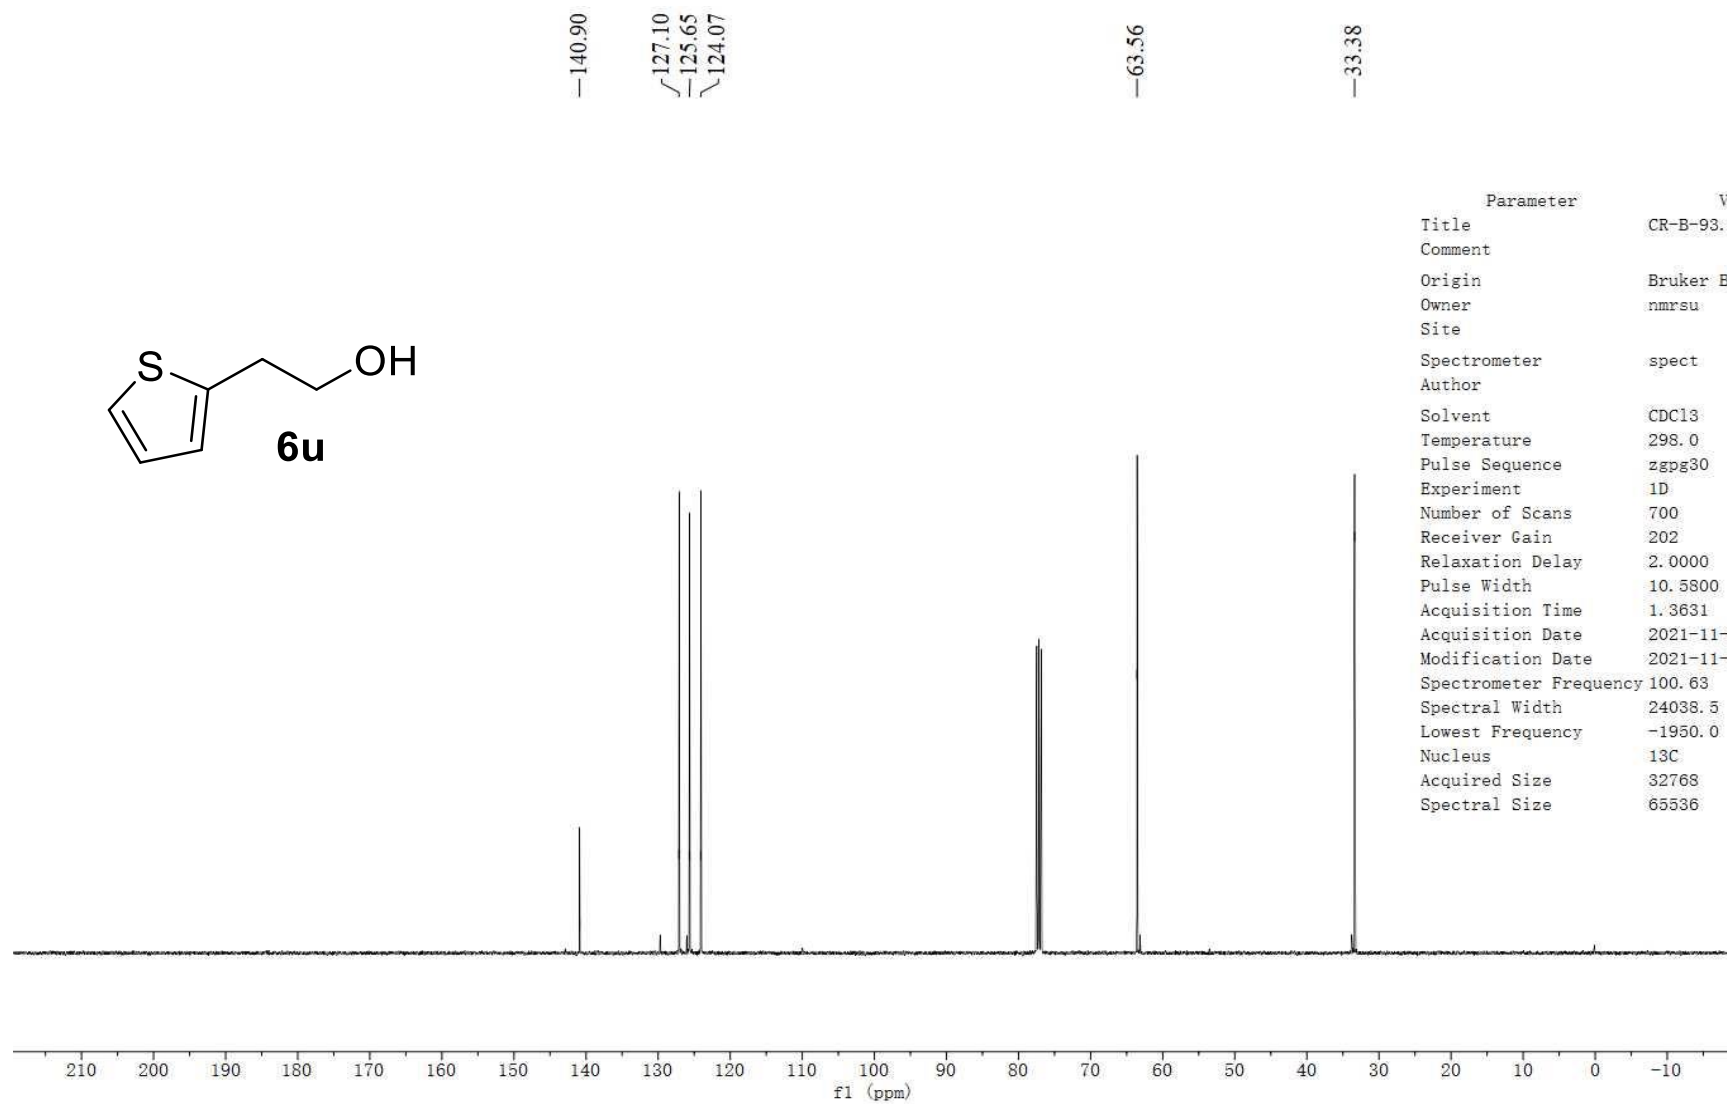

| Parameter              | Value               |
|------------------------|---------------------|
| Title                  | CR-B-93.3.fid       |
| Comment                |                     |
| Origin                 | Bruker BioSpin GmbH |
| Owner                  | nmrsu               |
| Site                   |                     |
| Spectrometer           | spect               |
| Author                 |                     |
| Solvent                | CDC13               |
| Temperature            | 298.0               |
| Pulse Sequence         | zgpg30              |
| Experiment             | 1D                  |
| Number of Scans        | 700                 |
| Receiver Gain          | 202                 |
| Relaxation Delay       | 2.0000              |
| Pulse Width            | 10.5800             |
| Acquisition Time       | 1.3631              |
| Acquisition Date       | 2021-11-03T23:55:16 |
| Modification Date      | 2021-11-03T23:55:18 |
| Spectrometer Frequency | 100.63              |
| Spectral Width         | 24038.5             |
| Lowest Frequency       | -1950.0             |
| Nucleus                | 13C                 |
| Acquired Size          | 32768               |
| Spectral Size          | 65536               |

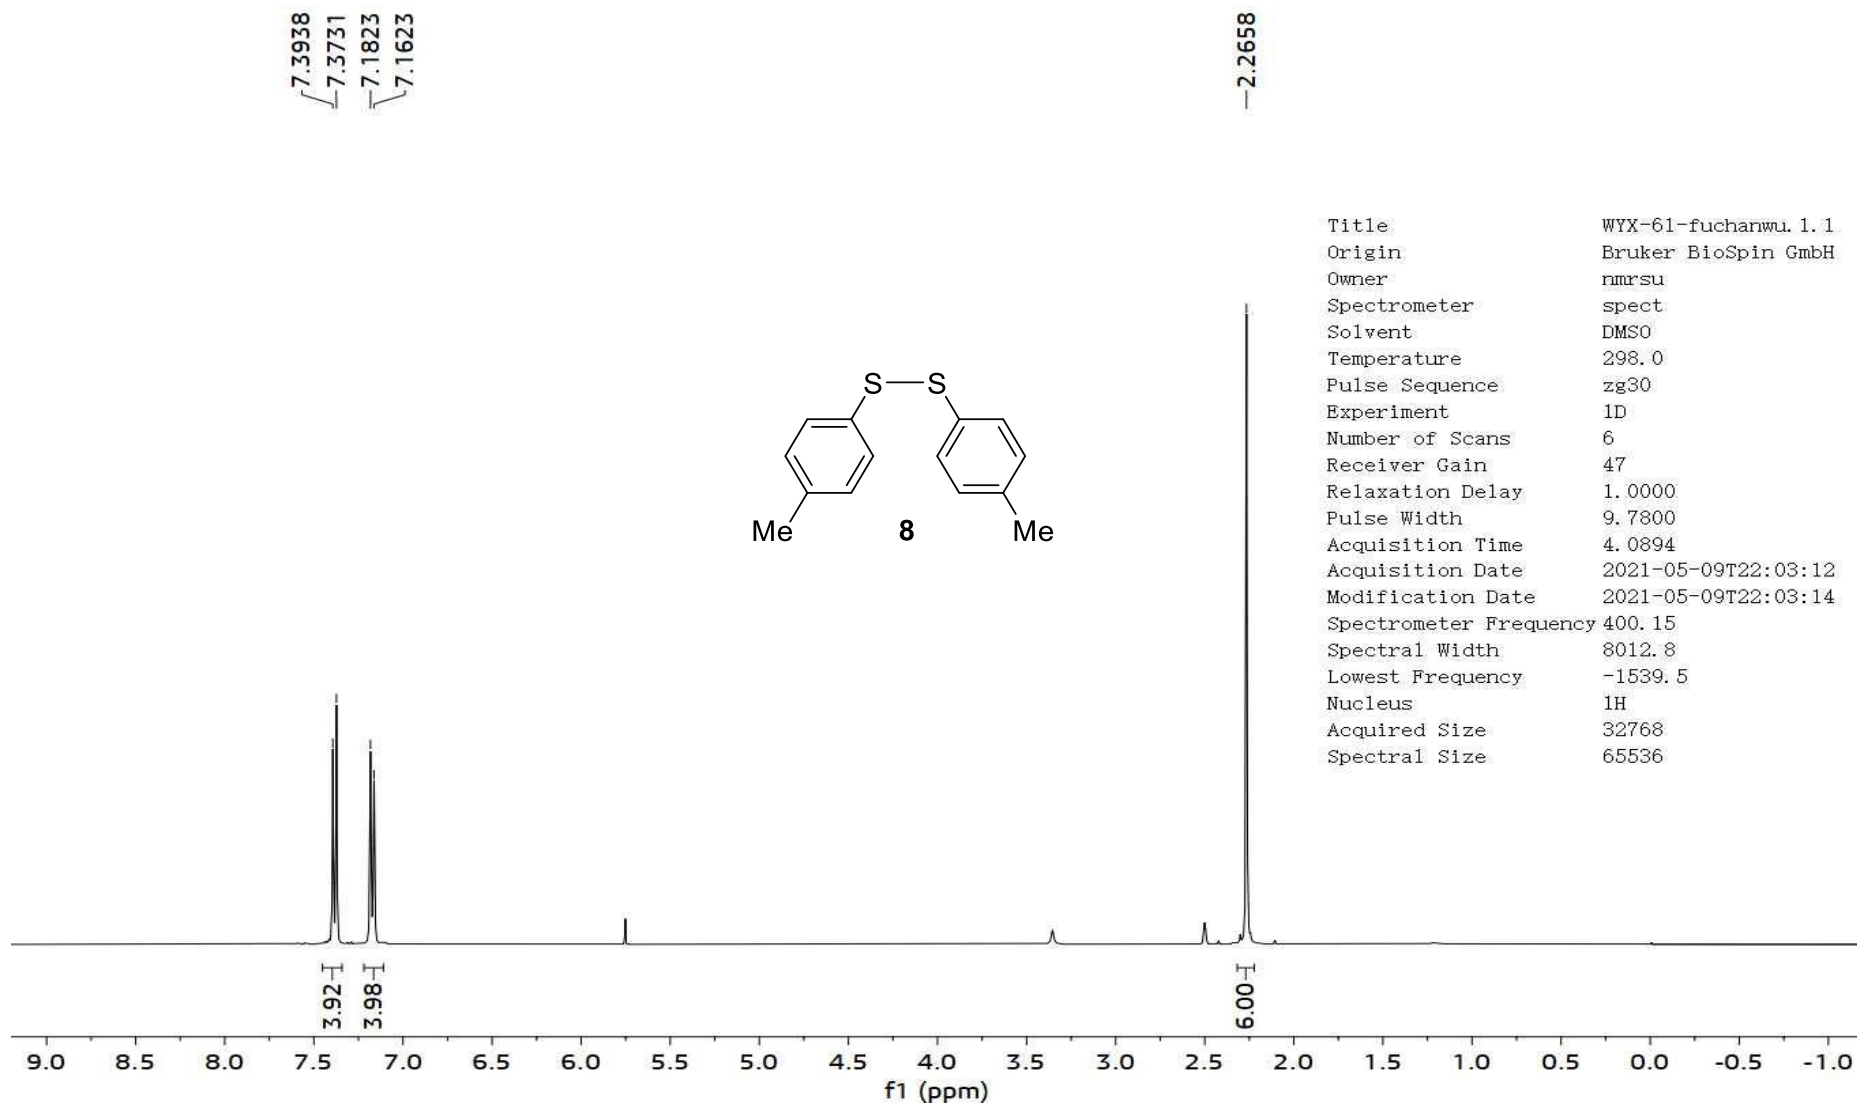

```

Title      WYX-61-fuchanwu.1.1
Origin     Bruker BioSpin GmbH
Owner      nmrsu
Spectrometer spect
Solvent    DMSO
Temperature 298.0
Pulse Sequence zg30
Experiment 1D
Number of Scans 6
Receiver Gain 47
Relaxation Delay 1.0000
Pulse Width 9.7800
Acquisition Time 4.0894
Acquisition Date 2021-05-09T22:03:12
Modification Date 2021-05-09T22:03:14
Spectrometer Frequency 400.15
Spectral Width 8012.8
Lowest Frequency -1539.5
Nucleus    1H
Acquired Size 32768
Spectral Size 65536

```



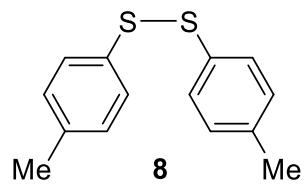

137.43  
132.61  
129.99  
128.09

20.54

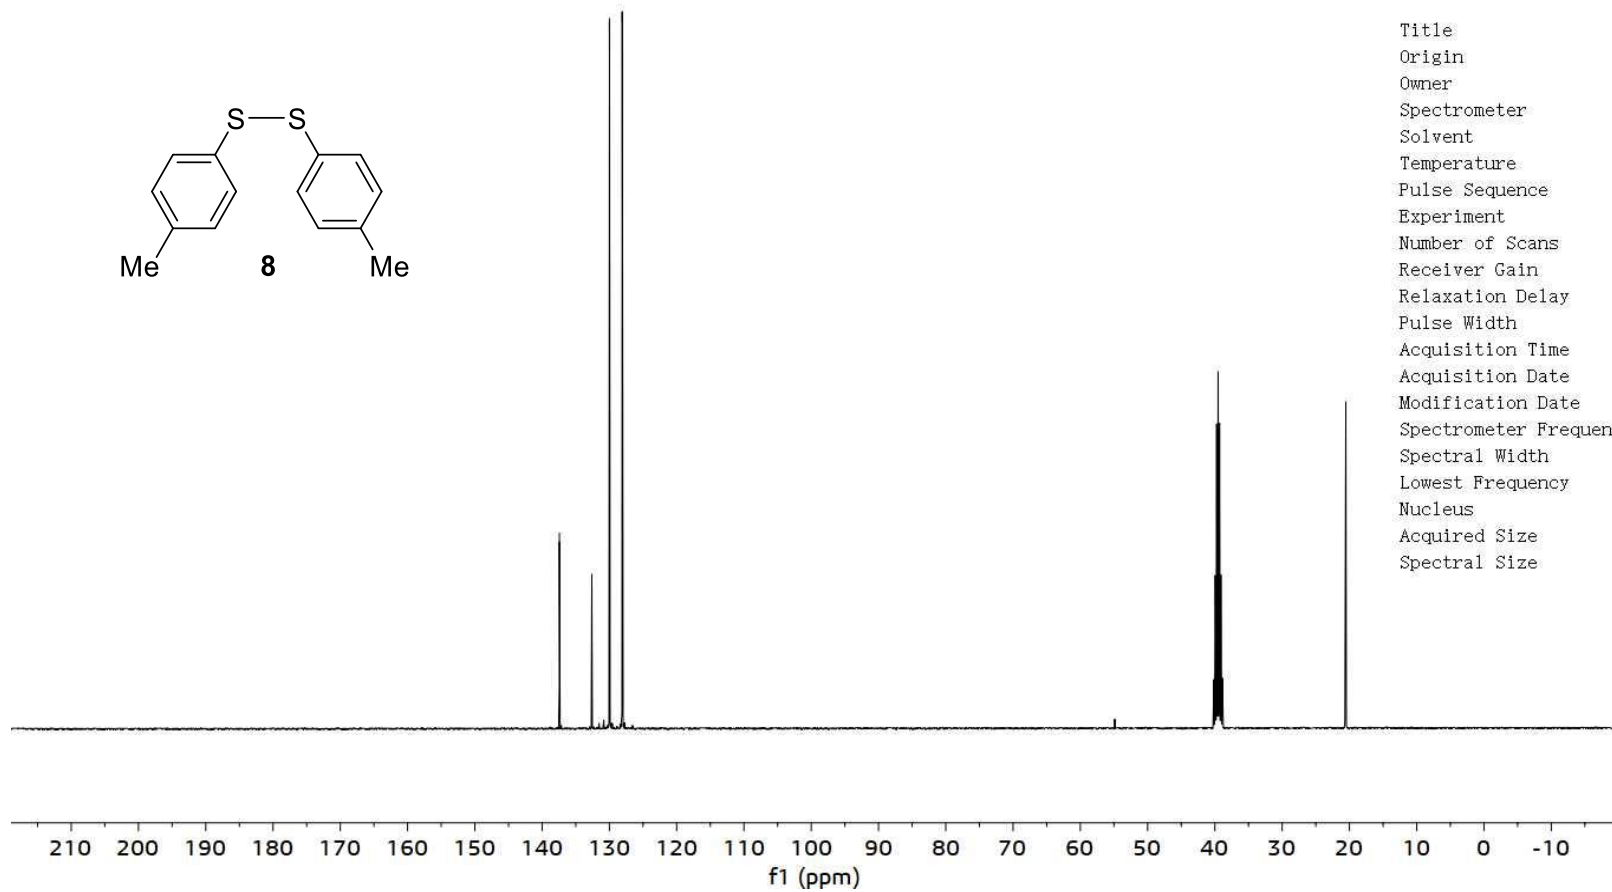

|                        |                       |
|------------------------|-----------------------|
| Title                  | WYX-61-fuchanwu. 2. 1 |
| Origin                 | Bruker BioSpin GmbH   |
| Owner                  | nmrsu                 |
| Spectrometer           | spect                 |
| Solvent                | DMSO                  |
| Temperature            | 298.0                 |
| Pulse Sequence         | zgpg30                |
| Experiment             | 1D                    |
| Number of Scans        | 1024                  |
| Receiver Gain          | 202                   |
| Relaxation Delay       | 2.0000                |
| Pulse Width            | 10.5800               |
| Acquisition Time       | 1.3631                |
| Acquisition Date       | 2021-05-09T23:02:46   |
| Modification Date      | 2021-05-09T23:02:48   |
| Spectrometer Frequency | 100.62                |
| Spectral Width         | 24038.5               |
| Lowest Frequency       | -2008.3               |
| Nucleus                | 13C                   |
| Acquired Size          | 32768                 |
| Spectral Size          | 65536                 |

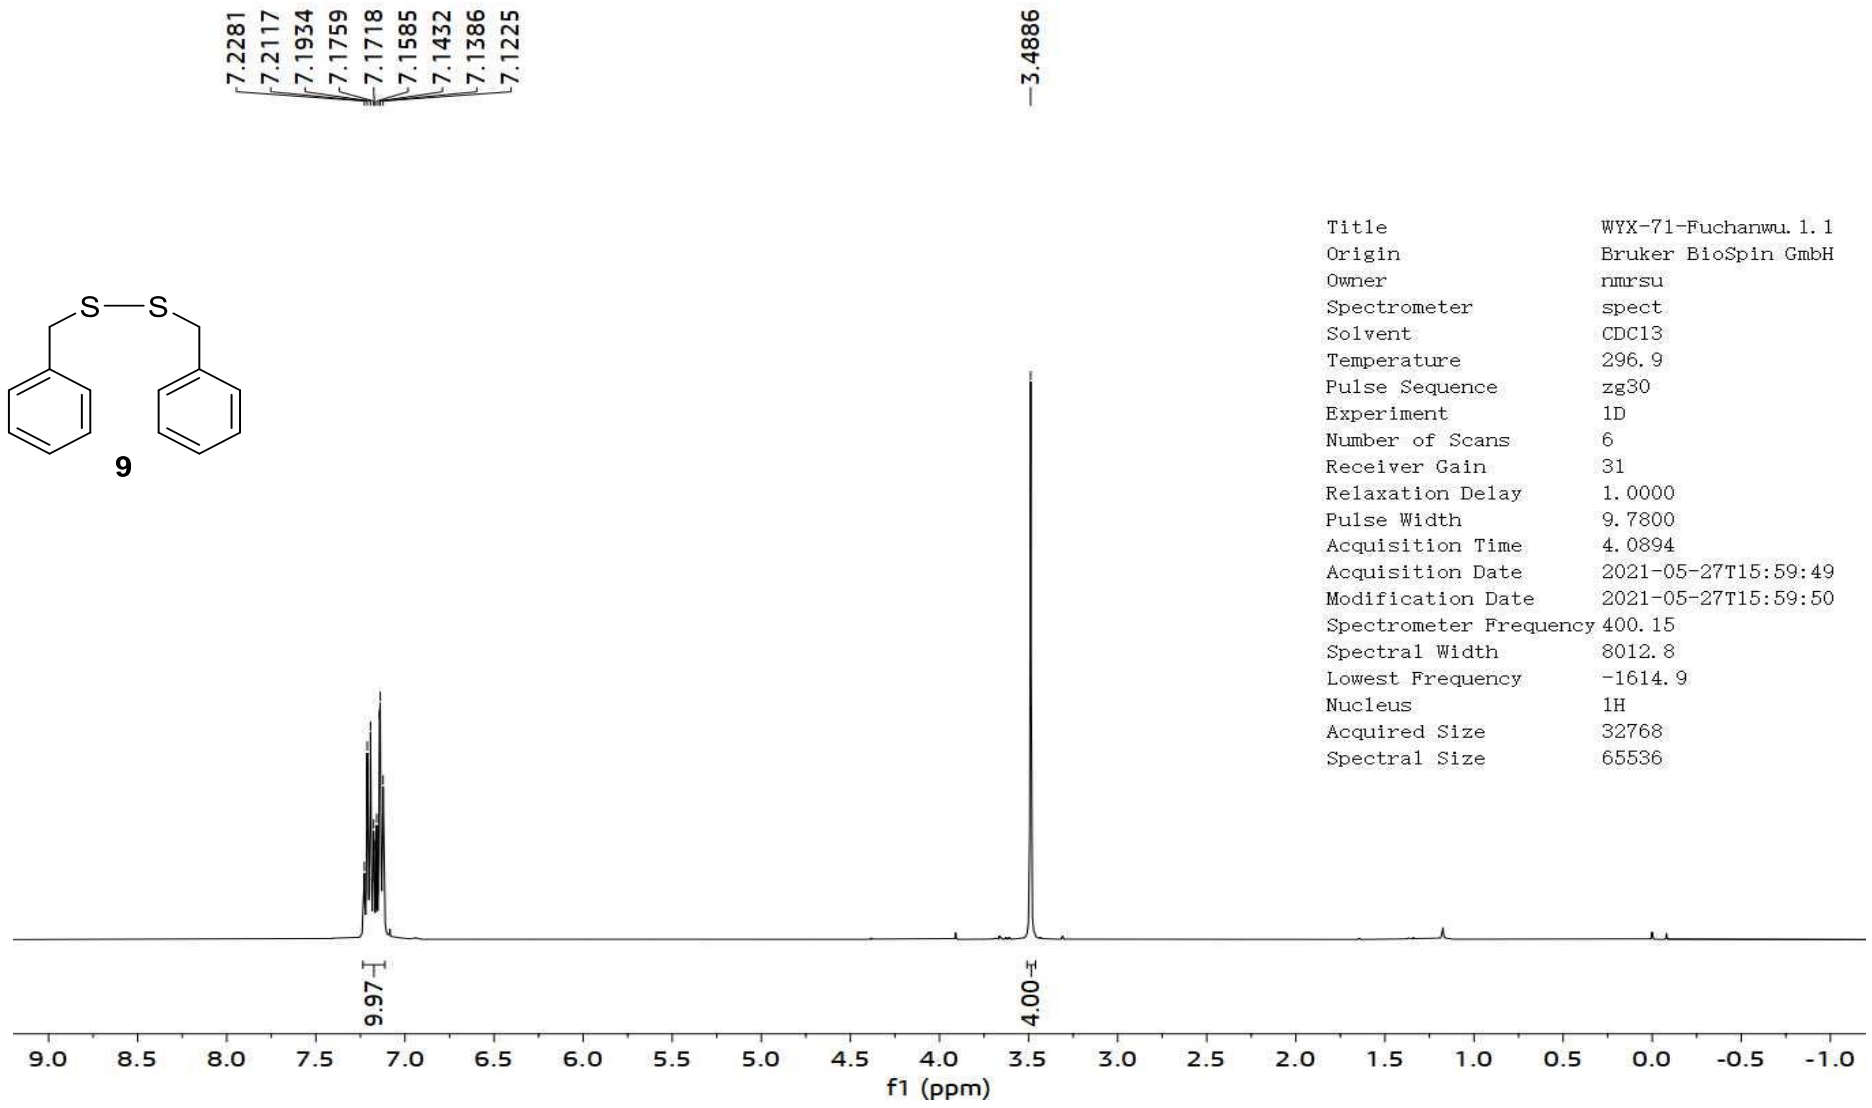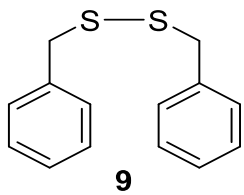

|                        |                       |
|------------------------|-----------------------|
| Title                  | WYX-71-Fuchanwu. 1. 1 |
| Origin                 | Bruker BioSpin GmbH   |
| Owner                  | nmrsu                 |
| Spectrometer           | spect                 |
| Solvent                | CDCl3                 |
| Temperature            | 296.9                 |
| Pulse Sequence         | zg30                  |
| Experiment             | 1D                    |
| Number of Scans        | 6                     |
| Receiver Gain          | 31                    |
| Relaxation Delay       | 1.0000                |
| Pulse Width            | 9.7800                |
| Acquisition Time       | 4.0894                |
| Acquisition Date       | 2021-05-27T15:59:49   |
| Modification Date      | 2021-05-27T15:59:50   |
| Spectrometer Frequency | 400.15                |
| Spectral Width         | 8012.8                |
| Lowest Frequency       | -1614.9               |
| Nucleus                | 1H                    |
| Acquired Size          | 32768                 |
| Spectral Size          | 65536                 |

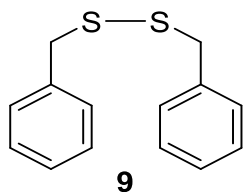

137.45  
129.50  
128.56  
127.50

-43.34

|                        |                      |
|------------------------|----------------------|
| Title                  | WYX-71-Fuchanwu. 2.1 |
| Origin                 | Bruker BioSpin GmbH  |
| Owner                  | nmrsu                |
| Spectrometer           | spect                |
| Solvent                | CDC13                |
| Temperature            | 296.9                |
| Pulse Sequence         | zgpg30               |
| Experiment             | 1D                   |
| Number of Scans        | 1024                 |
| Receiver Gain          | 202                  |
| Relaxation Delay       | 2.0000               |
| Pulse Width            | 10.5800              |
| Acquisition Time       | 1.3631               |
| Acquisition Date       | 2021-05-28T03:57:58  |
| Modification Date      | 2021-05-28T03:58:00  |
| Spectrometer Frequency | 100.62               |
| Spectral Width         | 24038.5              |
| Lowest Frequency       | -1960.9              |
| Nucleus                | 13C                  |
| Acquired Size          | 32768                |
| Spectral Size          | 65536                |

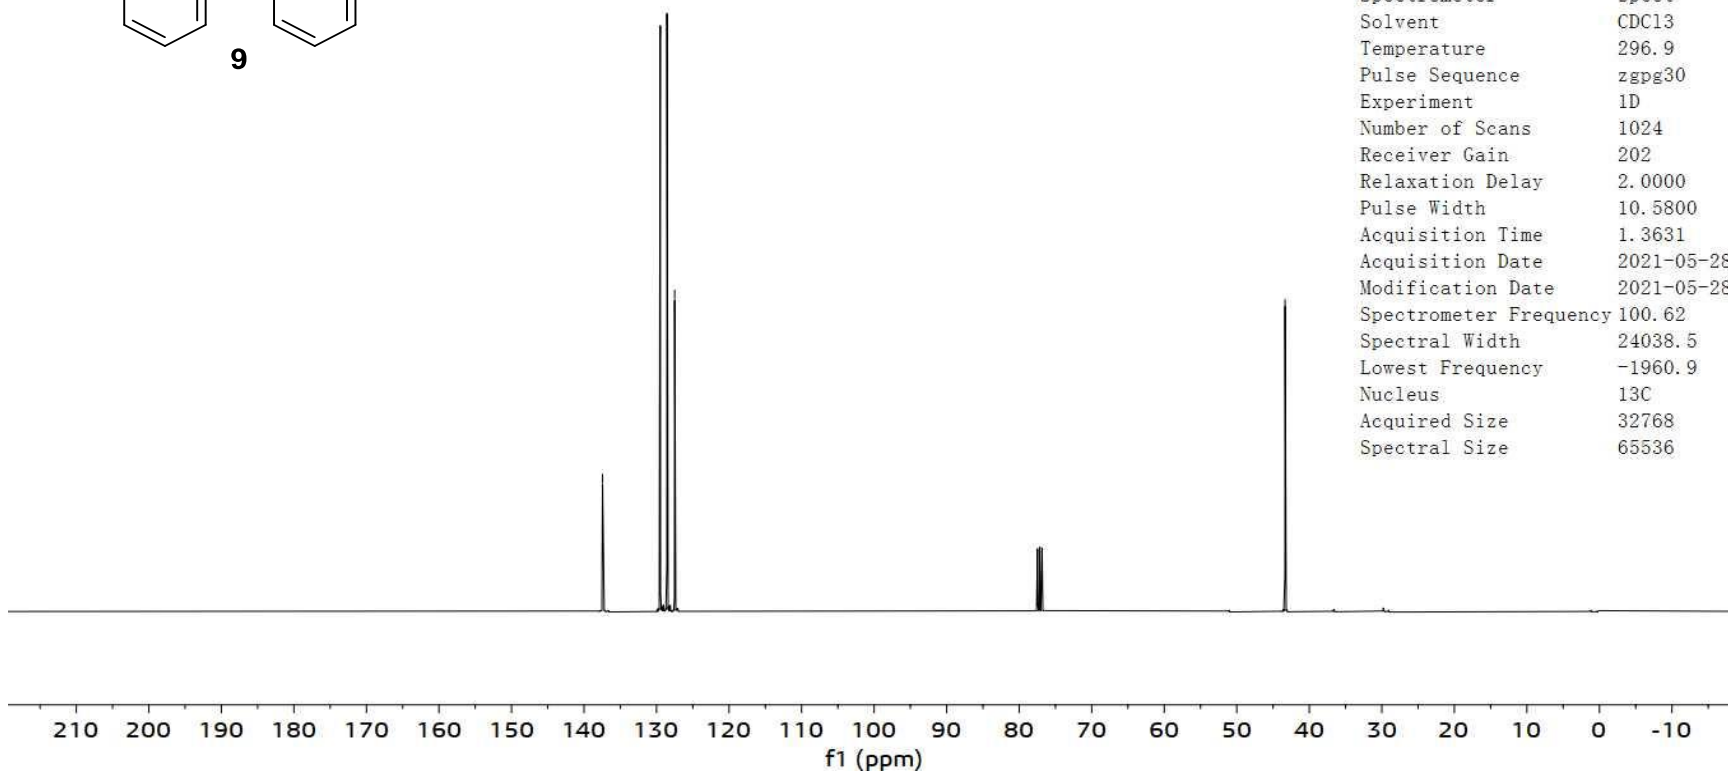

7.3476  
7.3454  
7.3434  
7.3411  
7.2458  
7.2416  
7.2264  
7.2222  
7.0203  
7.0170  
6.9998  
6.9965  
6.8510  
6.8354  
6.8321  
6.2943

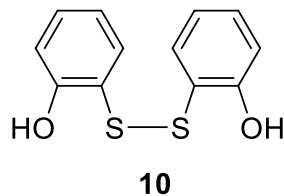

|                        |                     |
|------------------------|---------------------|
| Title                  | Fu-OH. 1. fid       |
| Origin                 | Bruker BioSpin GmbH |
| Owner                  | nmrsu               |
| Spectrometer           | spect               |
| Solvent                | CDC13               |
| Temperature            | 298.0               |
| Pulse Sequence         | zg30                |
| Experiment             | 1D                  |
| Number of Scans        | 16                  |
| Receiver Gain          | 31                  |
| Relaxation Delay       | 1.0000              |
| Pulse Width            | 9.7800              |
| Acquisition Time       | 4.0894              |
| Acquisition Date       | 2021-10-12T01:29:41 |
| Modification Date      | 2021-10-12T01:29:42 |
| Spectrometer Frequency | 400.15              |
| Spectral Width         | 8012.8              |
| Lowest Frequency       | -1545.5             |
| Nucleus                | <sup>1</sup> H      |
| Acquired Size          | 32768               |
| Spectral Size          | 65536               |

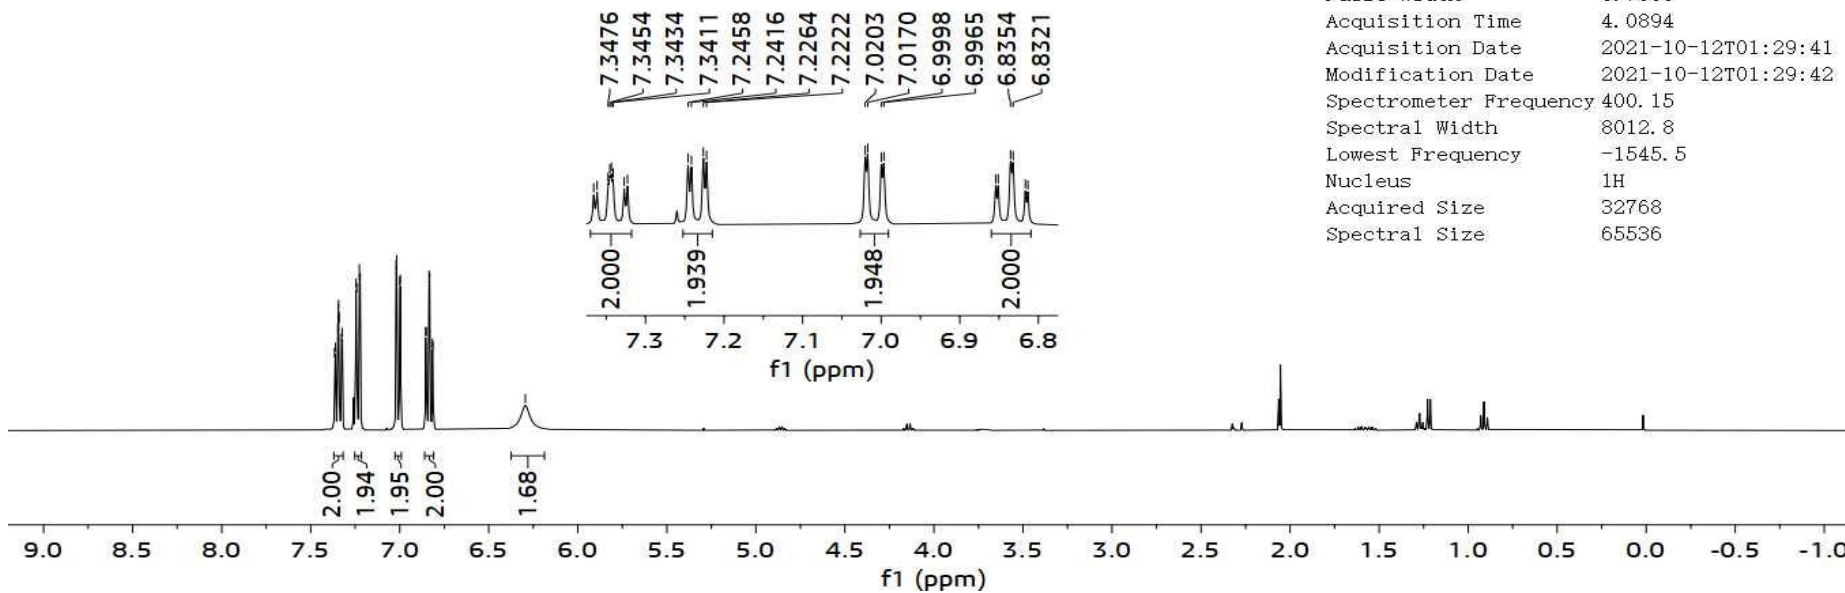

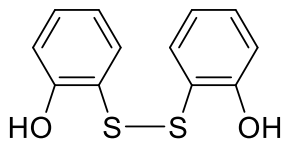

10

— 157.01  
~ 136.32  
~ 133.33  
~ 121.16  
~ 120.13  
~ 115.90

|                        |                     |
|------------------------|---------------------|
| Title                  | Fu-OH. 2. fid       |
| Origin                 | Bruker BioSpin GmbH |
| Owner                  | nmrsu               |
| Spectrometer           | spect               |
| Solvent                | CDC13               |
| Temperature            | 298.0               |
| Pulse Sequence         | zgpg30              |
| Experiment             | 1D                  |
| Number of Scans        | 700                 |
| Receiver Gain          | 202                 |
| Relaxation Delay       | 2.0000              |
| Pulse Width            | 10.5800             |
| Acquisition Time       | 1.3631              |
| Acquisition Date       | 2021-10-12T02:10:45 |
| Modification Date      | 2021-10-12T02:10:46 |
| Spectrometer Frequency | 100.63              |
| Spectral Width         | 24038.5             |
| Lowest Frequency       | -1950.4             |
| Nucleus                | 13C                 |
| Acquired Size          | 32768               |
| Spectral Size          | 65536               |

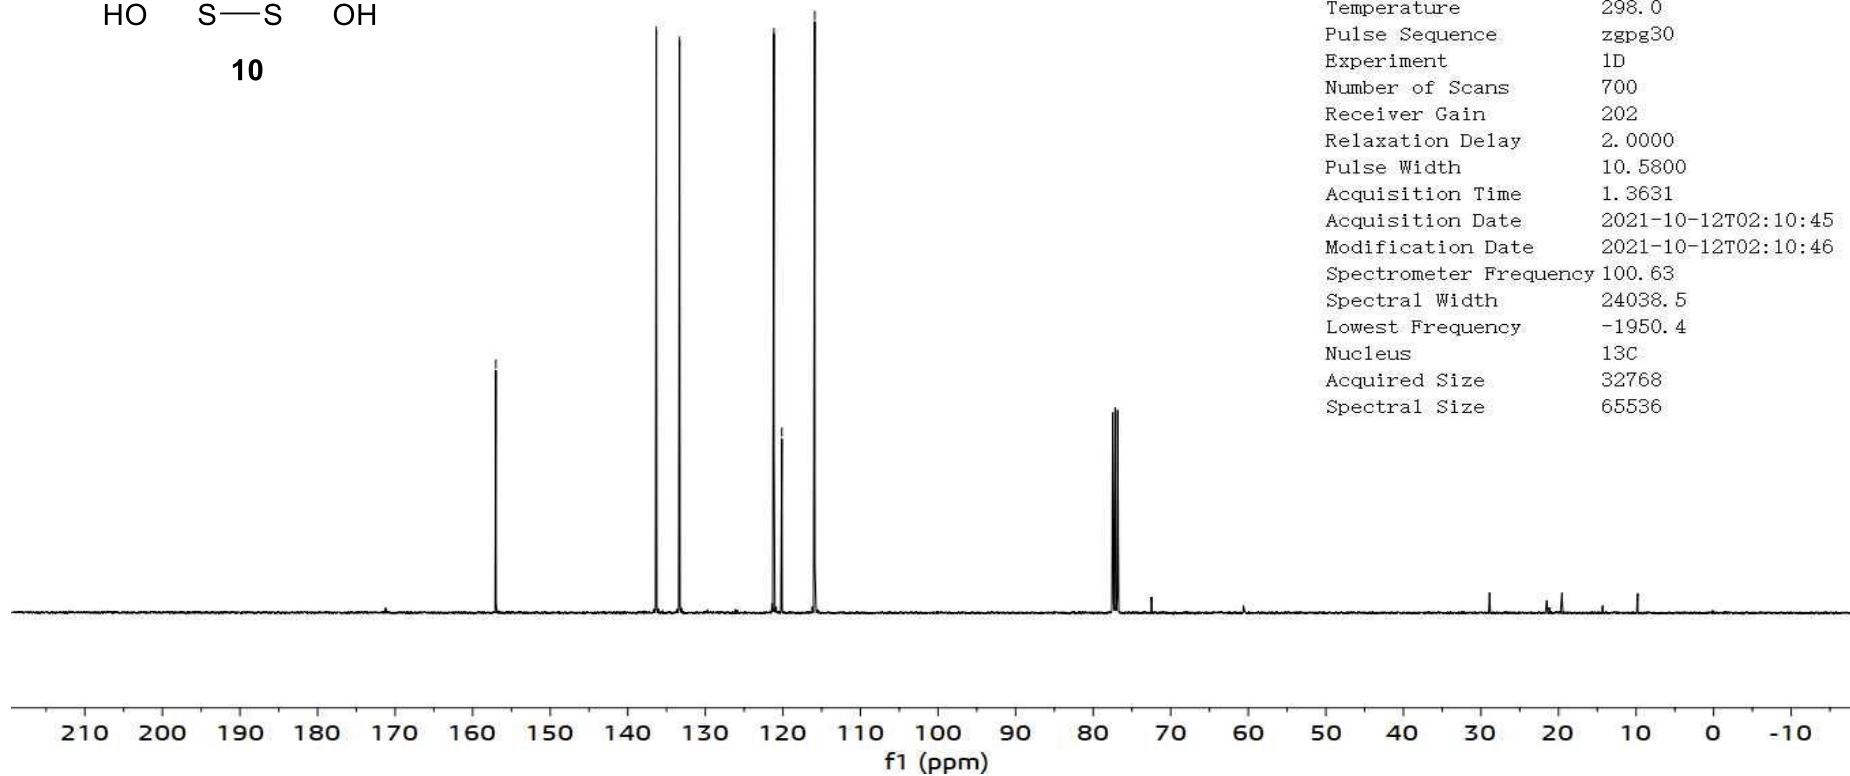

7.1763  
7.1729  
7.1689  
7.1589  
7.1538  
7.1496  
7.1412  
7.1372  
6.7220  
6.7189  
6.7011  
6.6978  
6.6100  
6.6067  
6.5914  
6.5880  
6.5725  
6.5692

4.2164

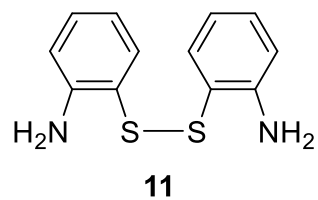

|                        |                     |
|------------------------|---------------------|
| Title                  | Fu-NH2. 1. fid      |
| Origin                 | Bruker BioSpin GmbH |
| Owner                  | nmrsu               |
| Spectrometer           | spect               |
| Solvent                | CDC13               |
| Temperature            | 298.0               |
| Pulse Sequence         | zg30                |
| Experiment             | 1D                  |
| Number of Scans        | 16                  |
| Receiver Gain          | 79                  |
| Relaxation Delay       | 1.0000              |
| Pulse Width            | 9.7800              |
| Acquisition Time       | 4.0894              |
| Acquisition Date       | 2021-10-12T02:16:44 |
| Modification Date      | 2021-10-12T02:16:46 |
| Spectrometer Frequency | 400.15              |
| Spectral Width         | 8012.8              |
| Lowest Frequency       | -1545.5             |
| Nucleus                | 1H                  |
| Acquired Size          | 32768               |
| Spectral Size          | 65536               |

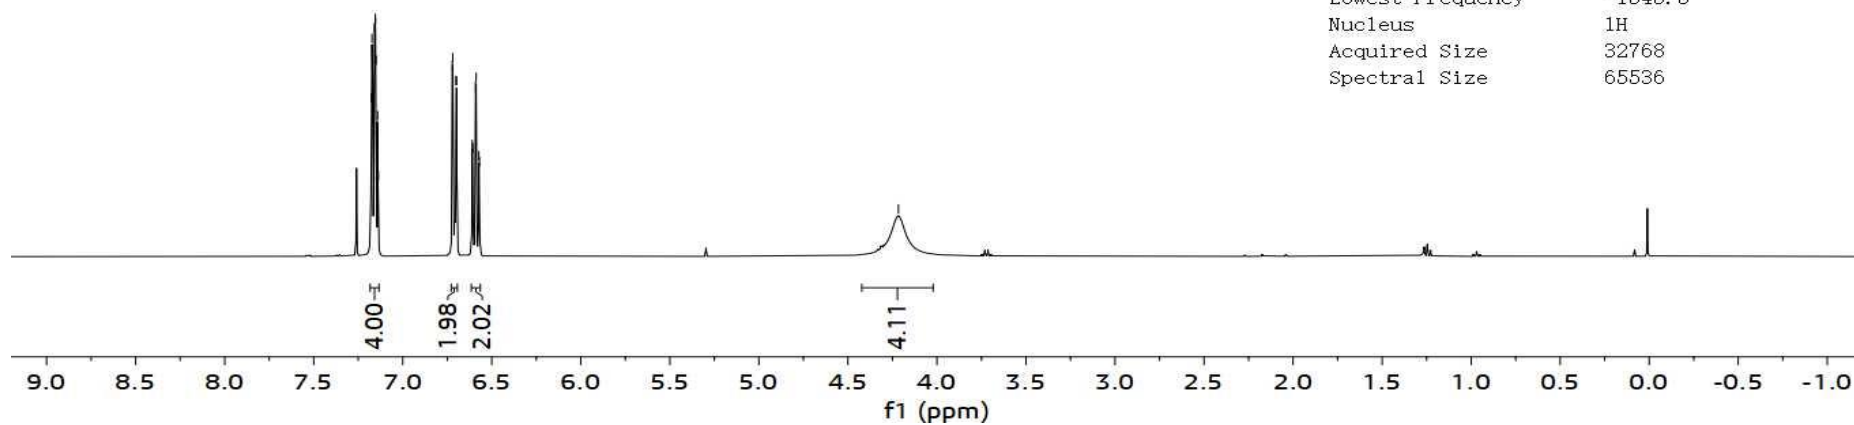

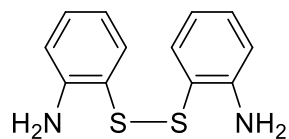

11

— 148.75  
 — 136.95  
 — 131.73  
 { 118.87  
 { 118.36  
 { 115.36

|                        |                     |
|------------------------|---------------------|
| Title                  | Fu-NH2. 2. fid      |
| Origin                 | Bruker BioSpin GmbH |
| Owner                  | nmrsu               |
| Spectrometer           | spect               |
| Solvent                | CDC13               |
| Temperature            | 298.0               |
| Pulse Sequence         | zgpg30              |
| Experiment             | 1D                  |
| Number of Scans        | 700                 |
| Receiver Gain          | 202                 |
| Relaxation Delay       | 2.0000              |
| Pulse Width            | 10.5800             |
| Acquisition Time       | 1.3631              |
| Acquisition Date       | 2021-10-12T02:57:48 |
| Modification Date      | 2021-10-12T02:57:50 |
| Spectrometer Frequency | 100.63              |
| Spectral Width         | 24038.5             |
| Lowest Frequency       | -1947.8             |
| Nucleus                | 13C                 |
| Acquired Size          | 32768               |
| Spectral Size          | 65536               |

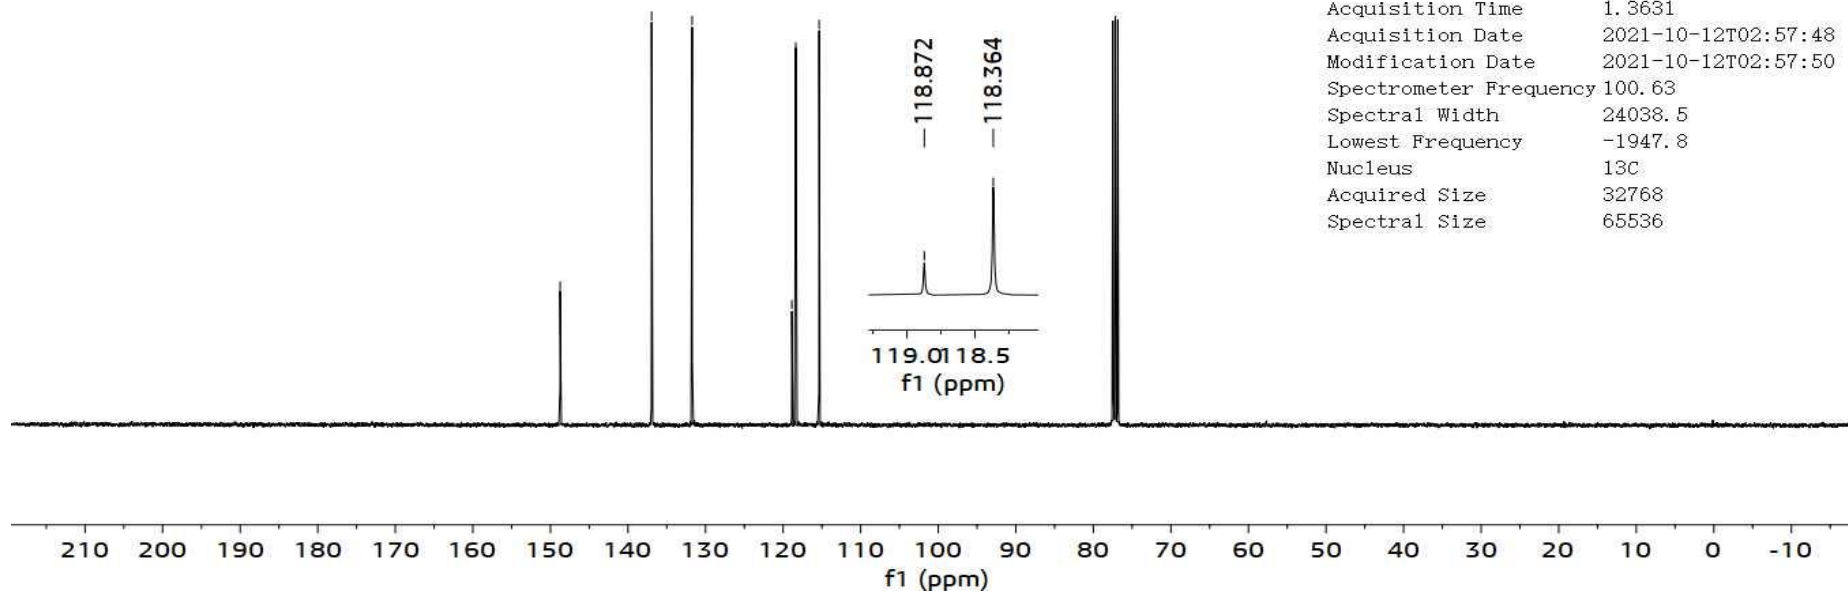

Supplement: d2gc01050j1.pdf [file d2gc01050j1.pdf]
